# Supplementary material for: Widespread premature transcription termination of Arabidopsis thaliana NLR genes by the spen protein FPA
Source: eLife. 2021 Apr 27;10:e65537. doi: 10.7554/eLife.65537 (PMC8116057; doi:10.7554/eLife.65537)
Supplement: Figure 2—figure supplement 3—source data 1. [file elife-65537-fig2-figsupp3-data1.csv]

genotype	m6A	A
Col-0	0.051704258	4.425659045
Col-0	0.021585906	2.293148935
Col-0	0.031023377	2.90377624
Col-0	0.026879023	2.674497072
vir-1	0.00318408	2.512245176
vir-1	0.003246056	2.656687633
vir-1	0.003352818	2.747061275
vir-1	0.002939701	2.503332037
fpa-8	0.029718794	3.109417144
fpa-8	0.033756333	3.391386934
fpa-8	0.039352388	3.882937407
fpa-8	0.028645085	2.875358956
35S::FPA:YFP	0.033475601	3.085790447
35S::FPA:YFP	0.02586809	2.454466084
35S::FPA:YFP	0.029228382	2.672754203
35S::FPA:YFP	0.027060359	2.623717096
