# Supplementary material for: Widespread premature transcription termination of Arabidopsis thaliana NLR genes by the spen protein FPA
Source: eLife. 2021 Apr 27;10:e65537. doi: 10.7554/eLife.65537 (PMC8116057; doi:10.7554/eLife.65537)
Supplement: Figure 2—figure supplement 4—source data 1. [file elife-65537-fig2-figsupp4-data1.tds]

	logFC_inagaki	logCPM_inagaki	LR_inagaki	PValue_inagaki	FDR_inagaki	logFC_lai	logCPM_lai	LR_lai	PValue_lai	FDR_lai
RLOC_00000002	-0.40525370864716964	5.04586788305397	7.004409563612912	0.008130918612440832	0.02307607017934681	-0.2504010505285307	6.621227183101516	4.876831998553284	0.027219533068327813	0.06302996861146311
RLOC_00000006	0.46373457069056834	3.819146329430949	3.754710603828327	0.05265891058311679	0.1087358857792211	0.6494680881258141	5.227211448047753	13.673697196481095	0.00021747932776141116	0.0008826113112358159
RLOC_00000008	-0.19909399024341198	4.544457884227106	1.3120307111017038	0.25202731298267117	0.36722202676959753	0.15846598820016122	6.174973151129287	1.5200405803154862	0.21761335233886944	0.3276057622893304
RLOC_00000011	-0.5598247298331782	4.626704077511461	10.466202214011918	0.0012157840063159154	0.0043221471379290485	-0.22147392743679542	5.930034718992366	2.539621575202542	0.11102139219541866	0.19517977171126935
RLOC_00000012	-0.5895741945983417	2.6987758842659417	3.299988803695443	0.06928035544023564	0.13594489185263434	-0.11611391681393558	4.006619150309266	0.19769384477010732	0.6565887828985071	0.7421969887652268
RLOC_00000014	-0.16730347438897267	3.3378963398951793	0.4127826607638738	0.5205605050198077	0.6307530218949609	-0.1506733323424011	4.975797063121286	0.6328652801385726	0.42630625415878237	0.5423950845163598
RLOC_00000015	-0.5110874980055734	4.796606693447184	9.45008697699898	0.0021113908807065284	0.0070725531160361	-0.11569003618040705	6.127789612406389	0.7837716830485846	0.37599010149213075	0.49467670119873186
RLOC_00000017	-0.2936699315466093	3.450903626772625	1.3742458101398884	0.24108373219198756	0.3553878564317132	-0.31471472260233013	4.72244561216881	2.3269747735871222	0.12714876894322308	0.2167102151193018
RLOC_00000019	-0.2816242813964069	3.1577679811299233	0.9939765673376435	0.31877240505464777	0.4381346829358068	-0.29066280829596647	4.523499959408091	1.7304891173437622	0.1883484448057623	0.2928005227780304
RLOC_00000021	-0.21608440612052712	3.095955143102304	0.571423800055513	0.44969369026785266	0.5666647893928601	-0.42507615661098025	4.436653950382956	3.4634701166038155	0.06273851927619463	0.12418772886138149
RLOC_00000025	-0.5864957235601551	3.50952121481455	5.483921443411537	0.019192157185124147	0.0477099848755466	-0.45388452486083625	4.786046260672201	5.013813263814862	0.02514585953722014	0.05896948386894667
RLOC_00000027	1.0489145273704221	5.30969845574137	47.83191163074226	4.643716912975164e-12	4.120857155740767e-11	0.8960836838613242	6.716927216867495	63.75990925884242	1.405448297770702e-15	1.3562317719020773e-14
RLOC_00000029	-0.11224409674433629	3.9057127434452306	0.2640116178327939	0.6073774180158146	0.7076981209696953	-0.26617908018585057	5.505164090153703	2.8316418035433992	0.09242382938680013	0.16986450864808597
RLOC_00000030	0.33555917015236164	2.957444986522749	1.193921655323182	0.2745399368633305	0.3912734533249041	0.023650833458959943	4.7772224222634465	0.013795604199078326	0.9064997475991109	0.934997627472548
RLOC_00000032	0.5813058865258026	4.31306072561428	8.89013221449829	0.002867159697207175	0.009269923776187534	-0.06983328715001423	5.537726728541979	0.2011598515238672	0.6537862716344305	0.7394271319497884
RLOC_00000036	-0.4147977131932659	3.6251061740866555	2.785051782368674	0.09514761797565646	0.17447330890977145	-0.1675116702399312	4.588248590876487	0.6029167973588327	0.43746729485628305	0.5529034704100296
RLOC_00000038	1.4026381043271283	6.58212362801689	129.72987180218138	4.695164782242934e-30	1.2510111645681807e-28	1.0201031739128545	7.662038981367014	110.55330859634263	7.41250475690621e-26	1.1845340554453317e-24
RLOC_00000044	-0.10301757071110612	2.4508244646722086	0.08300543856791887	0.7732651066495205	0.8399107180141403	-0.22541971531780453	4.181740188440047	0.8303430400884197	0.362173354149295	0.48136493717459544
RLOC_00000050	-0.14484709982012303	3.3268959716125943	0.2989347829719413	0.5845509880062538	0.6874990221924325	0.07928890378261845	4.6553877417020155	0.14244236568876367	0.7058649422947085	0.7835563574912396
RLOC_00000051	-0.20441711901146	3.6388948422010996	0.7206044775157001	0.3959457011394998	0.5161849544646492	-0.18042479282700505	4.701380202714035	0.7576095806078305	0.38407763507106996	0.5019207232525721
RLOC_00000052	1.1799389367338242	4.888262171645061	48.652089872471905	3.0564243800345558e-12	2.7636815798107464e-11	1.1669769481780372	6.204430605242297	79.51420328255908	4.787711034768648e-19	5.475618535298043e-18
RLOC_00000057	-0.6951390403820582	3.052530524490977	5.851290994887534	0.015565628187242173	0.04002154413658299	-0.2076092529546564	4.26291693450135	0.7437115729925328	0.3884745168445865	0.5059662513771633
RLOC_00000060	0.030043154764795944	3.346680542144963	0.012648501880441643	0.9104542766756977	0.9389051679220141	-0.13160410002712553	4.702114391963568	0.4038460639050543	0.5251096439429462	0.6309368450168222
RLOC_00000061	0.228682941699738	3.561542935155443	0.8444124536500155	0.35813784856972564	0.4792518972957272	0.21337579881212684	4.628034628998152	1.0104489735316502	0.3147953028814639	0.4331065240404259
RLOC_00000062	0.41343878021155733	5.323857325770337	7.437393726472038	0.006388233646496287	0.018738104727834038	0.3413450798842599	6.669508398415764	9.294896187740612	0.002297931626288489	0.007539370045125889
RLOC_00000064	0.07062750876780542	3.918164423318228	0.1000144806874328	0.7518122573488815	0.8235964810235373	-0.16260956978105176	5.2527297929399275	0.879656028100106	0.3482959078346586	0.46767071452824627
RLOC_00000065	-0.4664972192940871	3.6425457582120577	3.9211537244491677	0.04768214656452374	0.10018088779288557	0.11222387695219578	4.675793503495754	0.28925485464863243	0.5906984330270975	0.6875855472752671
RLOC_00000071	-0.46064669080513865	3.8620532919972486	4.029396197010653	0.04471394133267093	0.09511792423715895	-0.25801282766693645	5.545436239943519	2.7410952081460107	0.09779771883123256	0.17767403530180145
RLOC_00000072	-0.36750579631147334	3.4321906146781713	2.124370278904789	0.1449723526542205	0.24149789878832228	0.009957831016930298	4.480407515142735	0.0019942428504382548	0.9643807513347131	0.9757187538077627
RLOC_00000073	-0.2479742483199795	3.863881395827091	1.2338496094674136	0.26665968491028946	0.38253530639358	-0.24549729965171296	5.508883949414341	2.4172991210142403	0.12000167099914825	0.2075271856069935
RLOC_00000075	1.4672670410136845	5.8002243107560965	108.48153726309212	2.1080483101430333e-25	4.356356527535741e-24	1.3856907079581748	6.974004196334179	161.88400475864364	4.385615705831355e-37	1.0885243332275035e-35
RLOC_00000081	0.09521128760536905	5.665921842731508	0.4855089062730489	0.4859375478474499	0.599879160077908	0.11918614482285599	7.4236936857907185	1.4800129500164	0.22377249616327016	0.33514799389702904
RLOC_00000084	-0.17931680962442423	4.02880023937258	0.7186424130426106	0.39658958362062485	0.5165505519664169	-0.14179153231912164	4.706696141807779	0.4704513597740263	0.4927795952146503	0.6030531946021734
RLOC_00000085	-0.37413011534278584	4.880510043717682	5.1942944806624	0.022661151896698397	0.05455189563505713	-0.1688006305565594	6.11957462378485	1.6548237074054604	0.19830366824455964	0.304696357807644
RLOC_00000086	-0.37065400928595005	3.127198635086079	1.5879963716692638	0.2076126301206241	0.31776022612717764	0.013704498945400895	4.361634608735154	0.003483776633163238	0.9529333696579133	0.9684297210375019
RLOC_00000091	0.8773909574607518	5.922834654841047	46.128425259657874	1.1074990170030117e-11	9.632580514082532e-11	0.6635662963932779	7.189682008186577	42.29945265641537	7.831447453271138e-11	5.651021774013312e-10
RLOC_00000093	-0.4115668471556403	3.384937854680836	2.4465321963006534	0.11778482488313434	0.20502488668929603	-0.33289766124660275	4.677553342859519	2.518117342761683	0.11254487833662438	0.19741543570934128
RLOC_00000095	0.05959604729216774	3.576770679265223	0.05691056799033767	0.8114472817270756	0.8672952111149297	-0.3884516512331268	5.009789137599516	4.251395474336597	0.039218091989223484	0.08494793676556879
RLOC_00000099	0.08132724706840663	3.4290226490776434	0.10218348682372835	0.7492249335962271	0.8214478697538582	-0.354461491701847	5.099303209084109	3.7446724299636402	0.0529761101883703	0.10854823110605903
RLOC_00000106	0.48061102529926303	4.395338101398642	6.432456235959744	0.011205351516538023	0.03028676112786204	0.4693680254791116	5.912691126112627	11.320557201800304	0.0007665370806501119	0.0028139415418690647
RLOC_00000109	0.6045008023473277	4.469136658020586	10.408674021587057	0.0012542477188647524	0.004437847169747951	0.342729143201478	5.5852710957373475	5.007164450308897	0.025242620602178457	0.05916996510432499
RLOC_00000110	0.29358425994668436	3.8302941794802554	1.5888389733629227	0.20749209057934231	0.3176220424178967	0.0923009218372879	5.489881312434663	0.3398102900276554	0.5599387465731981	0.660390575182207
RLOC_00000112	1.4999535983786927	6.3784807656260405	141.17098192172148	1.476231306451064e-32	4.492022102934281e-31	1.2733217648693334	7.509006295756933	162.72031513781766	2.8795362174034624e-37	7.198154939647369e-36
RLOC_00000113	0.743656250178631	3.716145449942272	9.325986105545438	0.0022592670401034593	0.00751752310206216	0.4498875144970424	5.07284868318583	5.986792182192471	0.014413390286301278	0.037410676048424504
RLOC_00000115	-0.06967967785299238	3.0826904818931933	0.05952834614643032	0.8072429674235909	0.8643856254603077	-0.35066235134432017	4.444334887412167	2.379509283435637	0.12293615850586888	0.21124496369118123
RLOC_00000124	1.5838847151400972	7.213594994898146	175.3519065023056	5.0160259666484e-40	2.3095719560471448e-38	1.074521613429214	8.386813269365424	139.31158179722232	3.7649347612055236e-32	7.73543053970583e-31
RLOC_00000125	-0.31601530714173215	3.9026802902843793	2.041821195243151	0.15302634028822637	0.2516401191017858	-0.27166157865002755	5.4133933790759885	2.752017919535917	0.09713177098609826	0.17673545531663157
RLOC_00000126	0.5461955589124244	6.174108960000976	19.831769054428662	8.45654215238705e-06	4.331948778332854e-05	0.4538614340966648	7.4079847162992545	21.24176656717754	4.048456487710057e-06	1.9992824395328266e-05
RLOC_00000127	-0.36240426877067833	3.4026977990836866	1.8812744531722982	0.17018936850487362	0.2736286924578992	-0.04731318163478512	4.656948411356448	0.05061646175297252	0.8219940354883576	0.8734050580500219
RLOC_00000130	0.13427101617433956	2.5711499410115364	0.15053751666389825	0.6980222165005763	0.7822200286958849	-0.664510601692187	4.315101407159951	7.654353816068222	0.005663547331926653	0.016679266041486094
RLOC_00000131	0.1626026778939492	6.004530422251619	1.7219049409359322	0.18944802181407816	0.29686071799969777	0.07432446797304226	7.266778986594604	0.5504080658136346	0.4581510066008647	0.5712740401784416
RLOC_00000134	-0.1431411114163697	4.3646322890702445	0.5565615985508199	0.45564895372765835	0.571715124908337	-0.441641300158897	6.003400005383098	10.41403190324456	0.0012506139844194787	0.004366219072791536
RLOC_00000142	-0.14796382455585666	3.816983114903151	0.4292734125209994	0.5123456891503317	0.623317307300983	-0.040927402926196385	5.529478451524693	0.0686677712517687	0.7932864706458367	0.8500423204032088
RLOC_00000143	0.21750963699303666	4.533601152571786	1.5334869507724558	0.21558986906578	0.32711122158275446	0.0932641501411101	6.165050366739044	0.5223943018149821	0.46982212423498837	0.582850346489796
RLOC_00000145	0.6521940360805787	3.9264270395635053	8.491706578318984	0.0035676899908460586	0.011267632227407317	0.5814409297102872	5.481402225424309	13.274291907710403	0.00026907049694485137	0.0010757696677166772
RLOC_00000150	-0.25917218857901025	4.656851514332133	2.3821138286646795	0.12273137599175662	0.21187863594169726	-0.34066050450971924	6.5172215965770395	8.560157005764513	0.0034359978731476754	0.010791068402685445
RLOC_00000151	-0.45899757198871965	3.271010294783044	2.5561781763542974	0.10986388571237062	0.19416684717314256	-0.35200505490189193	5.000929928058121	3.4790996111666015	0.062148546518338975	0.12320573827342161
RLOC_00000152	-0.5397972379478355	2.8315902832816113	2.726064145354023	0.09872230370038873	0.1789341754569546	-0.30252466092831004	4.618620529117092	1.995669516851859	0.15774934182396055	0.2543320546390912
RLOC_00000159	-0.47582341408153817	3.469722552570646	3.662177026805968	0.055660859503222554	0.11399313178725891	-0.2060174566898667	4.838433658494741	1.0861721768339048	0.29732088959531083	0.41648726082203713
RLOC_00000165	-0.7458088363731774	4.274825756642979	14.048686430178662	0.00017813821471855622	0.0007515249195963632	-0.22419193314265903	5.964697590456707	2.6551533024181744	0.1032148055456924	0.18485678397627778
RLOC_00000168	0.2618208611069256	3.8401302275054423	1.3015857163636841	0.2539237773251026	0.36931169497906996	0.3671677333168587	5.276219358438656	4.563221394808591	0.032665576440318166	0.0731717275542779
RLOC_00000174	-0.2277116267989892	3.457150033012716	0.7617440406023848	0.3827832801342667	0.5031209155974483	-0.04181989467458046	5.206129924254701	0.05661854074931305	0.8119225829389802	0.8647123244508456
RLOC_00000181	-0.603235953345385	3.3832503888433165	5.483108248391255	0.01920108705538892	0.04772088350082218	-0.0584655661745966	5.266021514610735	0.11498507171326511	0.7345385507423271	0.8048979058556985
RLOC_00000186	-0.19709118559986613	4.081367753025658	0.8401043698317299	0.35936692270599363	0.48052909878582617	-0.2075075874081111	5.258358672092197	1.4341343635689014	0.23109089149929082	0.34302605257331464
RLOC_00000190	0.08064000350664387	3.3001016010822224	0.091273589927372	0.7625642508362883	0.8317247687078335	-0.5458406866310035	5.292958907539582	9.94810537634959	0.0016101502523478413	0.005497550406308939
RLOC_00000201	-0.012470273991890766	3.0245449650777347	0.0018078296577905828	0.9660853003271561	0.9766913985780513	-0.46255881665968884	4.491603681448225	4.244353511205347	0.039381060657139824	0.08519714729843623
RLOC_00000206	-0.3000191166247303	2.9263560637337678	0.8775440772481851	0.34887522023909634	0.46991173493328625	-0.15639549106543887	4.271631264010808	0.4250951135886343	0.5144055686435574	0.6217529565488887
RLOC_00000207	0.35271650867152227	2.4221656315911115	0.9684972932315522	0.32505523574796336	0.4449641237295761	-1.0353575178274814	3.9101552720068495	13.70870408605639	0.000213462873543843	0.0008683249551866748
RLOC_00000209	-0.20431147964116347	3.90660054721782	0.78201057442047	0.37652693917682334	0.496705178119916	0.2631049124528237	5.807436292163003	3.367169512604744	0.0665079296864478	0.13024934784145037
RLOC_00000210	-0.10305014784524472	4.32122541541923	0.3010719625502498	0.5832111757220485	0.6863076922688113	0.40824259681375935	5.8315185744376015	8.198938778528365	0.004191489904282327	0.012844848950688893
RLOC_00000211	-0.611199530384851	3.392318970394413	5.363231712852492	0.020565628894244476	0.05043166833258082	-0.002967931277653183	5.032180381169125	0.0002546598624473262	0.9872678461157008	0.9913279568064981
RLOC_00000213	-0.0197483798782087	2.7378719332733623	0.003680449169050526	0.9516246478982978	0.9673821587717952	-0.24565195663089004	4.353703011531356	1.1032058397587967	0.29356363144729536	0.4126555852945714
RLOC_00000217	-0.17033028351836488	3.536454024142711	0.47566349699562593	0.4903931682463594	0.603605051031807	-0.1382139477133819	5.022258915633573	0.547880538418088	0.4591850004327974	0.572291467182329
RLOC_00000218	1.0908067642928994	5.915767665336234	69.36259896197218	8.192760470096912e-17	1.019047386434566e-15	0.9950907997754204	7.345215884861165	97.25773987842238	6.086562047408168e-23	8.441587177772571e-22
RLOC_00000220	0.47047821564487396	4.16631529329577	4.905453549395784	0.026772020140959855	0.06273497041066887	0.2821499231957917	5.612273831399589	3.4538583720408997	0.0631042988510646	0.12472365091064141
RLOC_00000230	1.7200099257842547	6.135580792513215	169.97914059479703	7.476914103201533e-39	3.1778398483971537e-37	1.3270769560399567	7.386716482016079	169.76507648240337	8.326765417491827e-39	2.2076441949052196e-37
RLOC_00000231	1.6725106217854424	5.749143386903452	137.0927298453517	1.150834074785478e-31	3.3282248256468176e-30	1.039504666851708	6.98397755779561	94.83097757720381	2.0735524503266075e-22	2.8163295182379113e-21
RLOC_00000235	-0.2973013439748772	3.791202043386189	1.7384213215642066	0.1873389801022835	0.2942376740146278	-0.14600284763768315	5.3204669649547585	0.7402779056170208	0.38957186958398843	0.5069921423308553
RLOC_00000238	2.6633128372934403	8.296404350964801	373.730193154879	2.884206053734068e-83	2.523199596008354e-80	2.3625051873932894	9.465904427299051	654.249807524325	2.659906525902184e-144	3.1029287350496707e-141
RLOC_00000240	0.5281776341152097	5.69989357187523	15.594455157722338	7.848440506103508e-05	0.0003528733419642266	0.5869585384255604	7.030767585763682	31.68610838786118	1.8121378141545272e-08	1.0965783810264197e-07
RLOC_00000241	1.599045917872691	6.348081097641229	159.25398908034015	1.6468158823607498e-36	6.196513667750234e-35	1.4135616227396643	7.695453227431888	205.85347751992768	1.1029646044506483e-46	3.9387841435807336e-45
RLOC_00000245	-0.6298557053986331	2.3084296884419513	3.012143225108489	0.0826429529880126	0.15651916299263147	-0.16215204795013127	3.880504477014466	0.3550553111885836	0.5512652970666816	0.653464418415162
RLOC_00000246	1.0080013543702857	4.785997725064569	34.793718995082344	3.665541279861791e-09	2.619527049420632e-08	1.1350402445448675	6.163590472590671	73.38989723643493	1.0640935185796298e-17	1.152932698820179e-16
RLOC_00000248	-0.11660414786219961	4.095221166473073	0.3037205646931955	0.5815593076843677	0.6846708099215535	-0.08297112872614337	5.626661388697226	0.30048383148108027	0.5835792607921759	0.6810046303275598
RLOC_00000249	-0.20324764533042924	4.409341816689038	1.25138155894919	0.26328877098672865	0.37909827428592474	-0.05989822212631636	6.340620765361758	0.2402719002659377	0.6240098030281063	0.7156175774977704
RLOC_00000251	0.8515939319319171	5.720278246800531	40.115606927247676	2.3936892255078845e-10	1.8893946984497573e-09	0.4323935266224469	7.006861643132451	17.19718268403704	3.369356662580855e-05	0.00015228099698853378
RLOC_00000258	-0.19359404509213166	3.388585705799286	0.5259745939715863	0.4683041577851282	0.583878509314522	-0.25961096828414004	4.428654446258466	1.2975895918307758	0.25465398220249913	0.36979409162041926
RLOC_00000261	0.5135480730459804	5.115199187594234	11.041965786286607	0.0008907236358390514	0.0032591784092275036	0.5298266034869925	6.595271701972796	21.53967254891284	3.465840458442042e-06	1.7261792681775616e-05
RLOC_00000263	1.1092191326979945	5.071319162358272	47.615129003144304	5.186666249969238e-12	4.583301539745544e-11	0.6320580723873949	6.352454352353702	26.67098623778647	2.412165211515167e-07	1.3399641563861237e-06
RLOC_00000264	0.43169772495507513	5.228171194764803	8.296481625740647	0.003972195948908007	0.012381268726732857	0.06892662875843558	6.664071696947478	0.37943872315252936	0.5379037753576882	0.6413914522976001
RLOC_00000266	0.84877560856799	4.513368357946543	21.14583626633097	4.256249900766234e-06	2.270432492796947e-05	0.18452122171313848	5.95857783041626	1.8065269055758426	0.17892542243798276	0.28096590041525293
RLOC_00000269	-0.5031496800569398	2.9109058677010764	2.789010436524986	0.09491282194394884	0.17413400992093236	-0.1731307370544562	4.616096267455111	0.6551499574789146	0.41827743063160944	0.5343753482938771
RLOC_00000271	-0.4229348698704419	3.581935798039989	3.0780750993579655	0.0793543916577055	0.15177456768105252	0.2434351468713957	4.881147560025404	1.5691910942896792	0.21032452531438148	0.3193805599183817
RLOC_00000272	-0.25224118323926376	3.4084157485414375	0.9179246703090937	0.33802047672524965	0.4584675664937559	-0.16434243084665062	4.692565526896379	0.6241537860733732	0.4295078883435289	0.5455363319282251
RLOC_00000273	1.733699743650213	5.755066603826908	147.156539470831	7.252889094632487e-34	2.3500256085016004e-32	1.9945678429740816	7.121949093431568	323.15497826931886	2.9763844478164417e-72	2.648225450646171e-70
RLOC_00000274	0.7678443296765238	5.219326535532417	25.475905308642133	4.4794232129392835e-07	2.6552786498834894e-06	0.4646780509167308	6.530904207732608	16.152118228269366	5.8453162561271e-05	0.00025818247948287097
RLOC_00000275	0.9023032389916644	6.103864771923634	51.72883044995875	6.372017216854604e-13	6.070184822372018e-12	0.8702208725235051	7.449697781524979	77.37345681955705	1.4150415063962625e-18	1.585541171361191e-17
RLOC_00000277	-0.38779540127801077	3.075938028222083	1.7805379759116184	0.18208327997107282	0.2875748868867643	-0.04213040911836233	4.6547202145978535	0.04013551960788142	0.8412158443752215	0.8892393425388089
RLOC_00000278	-0.13968730207346122	3.999575742214238	0.4205482942593566	0.5166635828308117	0.627189843158777	-0.2572090816523656	5.559520370939628	2.7549108659012984	0.09695621986798528	0.17651176563100007
RLOC_00000279	0.3992407590826934	4.108985388332461	3.5439490674562704	0.05976301460272626	0.12072197946881283	-0.25991419381356373	5.790926358718275	3.2288709848927315	0.07235055225380167	0.1395569443528686
RLOC_00000280	-0.009255466974504708	3.5082488525916395	0.0012611229619157172	0.9716712440748662	0.9803425398460773	-0.5970336574701811	5.074093128367481	10.278460265743616	0.001345922183017981	0.0046698073362543896
RLOC_00000284	0.14740944989408622	3.8697676846782727	0.41674474174011955	0.5185658403240647	0.6290621899378358	-0.17064375081242397	5.194108772509551	0.93147643807055	0.3344795672332527	0.45370813648345215
RLOC_00000287	-0.6496224266753297	3.903910399689337	8.677904253390977	0.0032209115958206917	0.010302599004547722	-0.08234959165541768	5.243715365239	0.22456126064858228	0.6355862297744257	0.7251705962183976
RLOC_00000290	0.4247869931652688	4.329185045014731	4.8639147188480845	0.027424042350802705	0.0638842088820109	0.6494585901100128	5.517159340464739	16.931112474174626	3.876105187752645e-05	0.0001737627171913536
RLOC_00000297	-0.594841385151424	4.036517683242165	7.925983941041364	0.004872983760804695	0.0147638047679445	-0.5408433496602596	5.7006113098419045	13.060465770591495	0.0003015944268491077	0.0011975945111530944
RLOC_00000298	-0.07275774772155984	2.7163934265468725	0.0498973804781484	0.8232419356132902	0.8758997520533114	-0.1567288827549083	3.921708285919817	0.3404498534619247	0.5595696730161911	0.6601777724460041
RLOC_00000300	-0.5023044021178379	3.4308565458444336	3.4222316353205855	0.06432400437157368	0.1279896508515505	-0.04951439003316136	4.870162356867444	0.0643445004140708	0.7997565562813683	0.8555781622578038
RLOC_00000302	0.04057730381261504	3.492876136512886	0.026496937147785005	0.8706926021768857	0.9109510509455004	-0.4568425124984147	4.893646365909872	5.456996071520651	0.019490125224846454	0.04812653109731183
RLOC_00000307	-0.43600011057363103	2.460588584106507	1.5594986699846185	0.21173863971601348	0.3228045657477069	-0.6945318002894325	4.353118337728914	8.54678622851409	0.003461327790870562	0.01086087282616558
RLOC_00000308	-0.4932584148847264	3.7073894342075957	4.388546883567438	0.03618113763751445	0.07999780600645044	-0.09695251892330284	5.285443605375535	0.3198294148129175	0.5717101784309478	0.6704165765962026
RLOC_00000314	-0.21693307969630024	4.234214315287181	1.2309961531910338	0.26721339744194134	0.38301559890025944	-0.46126493825149867	5.662293183056531	9.329224535323094	0.002255277748631913	0.007415922695121408
RLOC_00000326	-0.5368700428370917	2.5125769736847783	2.4456526960115004	0.11785085581122134	0.20502703055863736	-0.20891082631043514	4.315963667290406	0.7800154472586214	0.37713641550834415	0.49591375962695894
RLOC_00000329	-0.47473903112429866	3.077171006369559	2.7695137516812904	0.0960753424295259	0.1754131368122958	-0.15141164332095242	4.855918838383785	0.5941943908303156	0.4408017418915301	0.556180445633839
RLOC_00000330	0.3114426766289385	4.191359136887249	2.2314755926207863	0.13522465030083378	0.22878136645578614	0.8237814210662403	5.493160377835378	26.49138242359969	2.647163736969339e-07	1.4627669512863732e-06
RLOC_00000331	-0.1780763258715687	3.0801694382019233	0.3334667226675787	0.5636248514382004	0.6682780314432152	-0.42915042567526496	3.978968601252091	2.611648723356101	0.10608142168944683	0.1887070224190956
RLOC_00000334	-0.4140689102503393	3.288642347981366	2.4148218483420996	0.120191642814667	0.20838511416488428	-0.11456268716718593	4.860342771733875	0.3416423583680972	0.5588827521926703	0.6599522334080727
RLOC_00000336	1.3549220993768636	5.496469774006367	83.80965331734248	5.447814582700863e-20	8.228943523624986e-19	1.0231529583122625	6.797434656369187	84.91788288643936	3.110174118626705e-20	3.792534038497302e-19
RLOC_00000338	0.21527290523303416	4.47238158408955	1.346363335430131	0.24591489095044194	0.36081265201925083	0.12771007442911134	6.113193052000301	0.9479797412421305	0.3302340704339919	0.44928437287630957
RLOC_00000339	-0.5512108250159109	4.053232192028654	6.707945662273307	0.009598423917279412	0.026572851868037782	-0.13140811191957227	5.320056025135098	0.5999609424161436	0.4385929287061773	0.5541887138420024
RLOC_00000343	-0.24741714006426777	2.486223361728791	0.5044916847864025	0.47753313557924904	0.5925000422303458	-0.21999793807029103	4.0423764452742015	0.7233152703568826	0.3950585888665403	0.5126805366964892
RLOC_00000347	-0.22658827234600123	4.5231262463480135	1.5943039139502382	0.20671230076408162	0.31665923441140065	-0.1919360253795933	5.963348120981559	1.9462294362835877	0.16299374495624094	0.2611033457881559
RLOC_00000352	0.5891517912108452	3.612482425296129	5.627533196918689	0.017680495223965743	0.044628477725701464	0.34736938290790714	4.892512931330356	3.210954073564251	0.07314681945251819	0.1408857929612894
RLOC_00000355	-0.22247184512481724	2.120991963142586	0.32974718473056286	0.5658079927929561	0.6702351352898813	-0.45669920317204177	3.52540249605143	2.199013347367605	0.13809910554471935	0.2302894709520344
RLOC_00000356	1.2695953925067027	5.814308558472751	88.2130327849393	5.8771402047861356e-21	9.390900741224482e-20	0.9117846136779135	6.998278711951872	74.28302819221946	6.768290260828678e-18	7.402112442545862e-17
RLOC_00000361	1.3464204424966473	6.142134785404274	112.4330408526264	2.872024350608726e-26	6.229444552208762e-25	0.7496330710036245	7.27896847455119	55.098067215469285	1.146636047771753e-13	9.883852106367517e-13
RLOC_00000364	1.8875486391951983	6.065345612696366	191.11141128316783	1.818601716501568e-43	1.0209454983868163e-41	1.3869823178339462	7.168463824916638	172.7560017090171	1.8503582624817553e-39	5.072300626056383e-38
RLOC_00000367	0.5566918365984795	3.9712388905677845	6.405147445913751	0.01137899764335548	0.030679930217095447	-0.02132654538867893	5.682355997790121	0.020559785339812064	0.8859846772399264	0.9214416172701325
RLOC_00000368	-0.6618469723218539	3.41598462015768	6.816080459209996	0.009034062823885549	0.02523000572629702	-0.5081549045965699	4.778092667360752	6.2308462394586135	0.012554372619254501	0.03313432833824862
RLOC_00000369	0.06615245753259723	3.8018229161811137	0.083096266965339	0.7731444849556438	0.8398665979992083	0.25046951274349694	5.372923603042298	2.2824373870670396	0.1308460995282611	0.22132321555456955
RLOC_00000371	0.8282290937803347	5.413777755291636	32.06775120458516	1.4888840921945226e-08	1.0175979947824284e-07	1.1192048785141018	6.893698044432084	105.01953134540712	1.2093786170243973e-24	1.803588934678856e-23
RLOC_00000375	-0.2763860352315911	2.9412926492405815	0.8316039352001785	0.3618091441218818	0.48262673379815946	-0.28207930689268934	4.518015205329223	1.6238692313111645	0.20255312142150192	0.3097718027083152
RLOC_00000377	-0.08040113155556487	3.27015248626385	0.08808218315284799	0.7666295686627076	0.8346896091911538	-0.23690555253991857	5.0345639958790995	1.6163524813228838	0.20360113296458496	0.31084897228169694
RLOC_00000378	-0.30471004733053136	3.782098880568511	1.6117948916834992	0.20423967909462729	0.3143392686021694	-0.6041711773255971	5.27763151994118	12.030049383289402	0.0005234968938560601	0.0019849020905000994
RLOC_00000379	0.34816186028117113	6.504266941186124	7.51758256880359	0.006109962195152441	0.018022585873759576	0.3316619799169794	7.877551174006368	12.631110488900267	0.0003793797409048844	0.0014730320804295983
RLOC_00000383	-0.20114028549802498	3.877467689607263	0.8083772373637794	0.3686004562738212	0.4894113457572153	-0.21441577928980313	5.55838800422732	1.9174315982995367	0.16614007606084263	0.26513218704404723
RLOC_00000384	-0.48860501063993844	3.3714060602464904	3.4718451515099504	0.06242164507851402	0.1251054658331883	-0.5251196115765584	4.842221019289607	6.948326474456348	0.008389768165803287	0.02353933083184626
RLOC_00000390	0.2388416750829529	3.9270360607876813	1.1491883232023747	0.2837191264533285	0.40157521767655957	0.13206189473200727	5.55026456284408	0.7272778344950837	0.3937669738343424	0.5113369769062165
RLOC_00000391	-0.09217437662075828	3.7910304131167467	0.16633811708149204	0.6833869580489316	0.7709674615492792	-0.0177198541550846	5.06734738697341	0.009280295945323758	0.9232550761145083	0.9471619155878662
RLOC_00000392	-0.43225053112860823	3.6497007747801926	3.0573718383933794	0.08037156940817877	0.15321240886999468	0.12751776555614755	5.205258529165713	0.5265262300852447	0.4680709770172979	0.58115860781748
RLOC_00000394	-0.05209208686125468	4.26173284202314	0.07243007408555169	0.7878309072579686	0.8510649171016829	-0.07802401955930632	5.70578721509824	0.27900476483118863	0.5973542721830056	0.6936883637605181
RLOC_00000395	0.30137240088053	5.076359492160082	3.7246829455181834	0.053613805617866814	0.11036059854503089	0.27885884561864527	6.484337193557069	5.6800418784445785	0.017158958219293467	0.04332657584039493
RLOC_00000401	-0.5188262590923565	2.8718069316872783	2.8028627384916684	0.09409616386330052	0.17333243169625	0.3137579973475176	4.338062967943789	1.7982459488513607	0.17992469584017523	0.28240833930722076
RLOC_00000407	1.0902961763750403	5.231816254895744	47.77056922472656	4.791308489977812e-12	4.2482395716036384e-11	0.9035875253501875	6.650738347845936	62.766583095703766	2.3271392270064136e-15	2.2151074110915987e-14
RLOC_00000409	-0.23707983729681667	3.0430620170746225	0.6369982820833151	0.4247998574652006	0.5437811125069718	-0.31817138724417227	5.025411592160085	2.888301502138546	0.08922494522141697	0.1653322802470273
RLOC_00000412	-0.46370976852092255	3.1782457098350214	2.8030765935484476	0.09408361618828706	0.17333243169625	-0.48715184412405793	4.923781803350986	6.306612104547993	0.012028848211706846	0.03191581434791766
RLOC_00000414	-0.3685975146751251	2.8729853192414683	1.390057148657169	0.238395448827641	0.35229102221179265	-0.2919597066451252	4.492921645573904	1.7087010620914658	0.19115398781278525	0.2962734044556642
RLOC_00000416	-0.3469542153625614	5.652991031389248	6.761727990398221	0.009313353122460023	0.025913485576354447	-0.23006471565579165	7.0964299889050855	4.994407722677156	0.025429355043958803	0.059492542486755826
RLOC_00000420	-0.35869893467494735	3.930599399603883	2.4904265312068254	0.11454067900349486	0.2004080080297815	-0.38434778130377883	5.718191726152581	6.724723820584529	0.009508545303382788	0.026167815764145713
RLOC_00000421	-0.23798151171702187	3.2682774152225478	0.7875492631727266	0.3748422047137696	0.49522247876212727	-0.21656960187393265	5.032997753793883	1.3518138227857581	0.24496127202414364	0.3590963969535722
RLOC_00000427	-0.26029716695626925	4.286248489813443	1.8311642910137276	0.1759900871245505	0.2802281108195861	-0.35759988580097224	6.027563655117259	6.958455165858708	0.008342403325233323	0.023431529808966747
RLOC_00000428	-0.5042300626239791	3.6730154496591036	4.60647259042481	0.031851486764268244	0.07231334516680105	-0.23836257711935893	5.045818931555504	1.6490145186141092	0.1990931134567657	0.3056856680582894
RLOC_00000430	1.323467212587235	5.071133645706757	63.07673065757719	1.9880894952433474e-15	2.268582991420072e-14	1.1788892903615082	6.316561374772723	86.83817572762644	1.1777406502545009e-20	1.45987002208052e-19
RLOC_00000433	-0.45562993644055616	3.607228641799139	3.5355408094723666	0.06006674260910093	0.12124219648343426	-0.29495152689851933	5.046085537585267	2.517957064349405	0.11255631947386578	0.19741543570934128
RLOC_00000438	-0.30944517510298025	4.159876687020028	2.329341292932598	0.1269555895203374	0.21741921350481272	-0.08728229098802841	5.540144953646042	0.3147816491590798	0.574760690052851	0.6733770000226008
RLOC_00000439	1.4956996357905779	6.7754130503111165	152.17080553936975	5.814270828048666e-35	2.0278476794968402e-33	1.10693390050086	8.10242154096412	140.98925076196915	1.6176803710883633e-32	3.363173508130045e-31
RLOC_00000440	-0.019159596587761823	2.795385060289988	0.003709117579870025	0.95143683833544	0.9673785887501645	-0.16979234878982147	4.224244127311985	0.48534291205806834	0.4860121124397628	0.5970794720928001
RLOC_00000441	-0.07501488337204844	3.6901891472684003	0.09886985443847962	0.7531900910614634	0.8244176390327644	-0.7059922239745209	5.081263341494072	14.304499740536166	0.00015549274296398598	0.0006470544226630555
RLOC_00000442	0.03206777588951083	4.247532099316055	0.02719897175911523	0.8690060783627276	0.9098260507282253	0.08787679290685362	6.055507427245646	0.4326776497033773	0.5106779828671578	0.6183379243596229
RLOC_00000444	0.6708238890683055	4.8981581452756116	16.85518445114453	4.034297626365949e-05	0.0001878139977010631	0.7649984760667605	6.154834692882861	34.20024174545934	4.97227763748567e-09	3.157935650802305e-08
RLOC_00000445	1.1635853207626823	5.303932779314229	54.991317431906424	1.2106345415116568e-13	1.2185274608618764e-12	1.2313263681021962	6.733461980535748	117.30509625134692	2.4613712779080937e-27	4.1281049595458586e-26
RLOC_00000446	0.21679529352176577	3.9690756435785812	0.9601586248847642	0.32714691560249876	0.44710871594271223	0.16885187392156403	5.41134207930355	1.0704955793656588	0.3008335330022324	0.4199509723428318
RLOC_00000452	0.8106007329767936	4.730598484746252	21.962525278823822	2.780264573736185e-06	1.5115078972077924e-05	0.25181878518871686	6.100652217906328	3.6581136172983566	0.05579677255615113	0.11291212611499533
RLOC_00000456	-0.10853384307609668	4.562552660640014	0.3894344905057805	0.5325968073607702	0.6409722897711069	-0.03756842011826813	6.174831122392856	0.08514256374020057	0.770445672133693	0.8320210976889161
RLOC_00000457	1.1850413201333967	5.603626244344234	68.06989574176649	1.5780154738793133e-16	1.924042560369922e-15	1.1161438187205306	6.870325758381335	103.52320002833916	2.5736269955135334e-24	3.7633022041638703e-23
RLOC_00000458	0.2303732766168886	3.8082945606583287	1.0297323193276204	0.3102215464484532	0.4298807673143386	-0.05182076751723996	5.770902003148397	0.12768872366671946	0.7208405896383838	0.7944683340975637
RLOC_00000459	0.007293644629427713	4.069363513346161	0.0012091309768555991	0.9722611007931643	0.9803425398460773	-0.3454658538359817	5.29947168821757	4.056760497429256	0.04399482241501984	0.09320049244053538
RLOC_00000460	0.4930047783306967	3.9570045603726167	5.00813204521029	0.02522851506157948	0.05981231958366337	-0.1440591989835337	5.476314398026857	0.8151561478392342	0.3666002116154592	0.48573140102861007
RLOC_00000461	-0.4083353830991771	4.629688158485009	5.091338101238323	0.0240456312834357	0.05734462453737119	-0.18004616922475752	6.314300333735944	2.1283081184918005	0.144600283809241	0.238307043632643
RLOC_00000465	0.3429318227091223	2.9700123805764846	1.2946790885240436	0.25518744154373924	0.37084132908723344	-0.3987316648032304	4.4714234946636005	3.1246393266467587	0.07711693514767293	0.1472359887462117
RLOC_00000468	-1.4164955359463052	7.523033587423458	90.93739648673773	1.482903820032959e-21	2.4593245343927334e-20	-0.4449825277785722	9.600165368286035	26.888480695597934	2.155397298752468e-07	1.2083390871122403e-06
RLOC_00000473	-0.00411588058982571	3.7092219058707907	0.00030573337359118824	0.9860495133937484	0.9894876377259221	-0.2605462450671871	5.517614428867751	2.7399447304120947	0.09786815171346602	0.17777123267122485
RLOC_00000474	-0.5201336419501633	4.419258500785905	8.222974680632424	0.004136334207214361	0.012821346384894171	-0.3826131742318015	5.993008902862559	7.801782342506229	0.005219472492309336	0.015554709536405255
RLOC_00000475	-0.35931184454905324	2.986073963585329	1.438573326244824	0.2303703468342467	0.34362431103522617	-0.42508458876968613	4.700937998569768	4.1516754509835945	0.04159334912680417	0.08910193276521465
RLOC_00000480	-0.020039314284880906	4.2960318209520585	0.010433493935334326	0.9186419990279321	0.9442772648384639	0.08680501463546872	5.747173788024243	0.35402480644629897	0.5518435797070645	0.6539284134700305
RLOC_00000482	0.9661476680346543	5.391386583614283	42.14605700086964	8.470456181862147e-11	6.925455529376077e-10	0.6115842582079836	6.8576083235738645	32.06083998453517	1.494190258332112e-08	9.10476118527501e-08
RLOC_00000483	-0.20836603966610207	4.035662062973147	0.9278278936863185	0.33542798231783455	0.45548091558305875	-0.6693715486818975	3.9967481831091503	6.3070668507258745	0.012025763174229544	0.03191569453140444
RLOC_00000486	0.04851183341784861	3.0161147909651103	0.027072938432773475	0.8693071921968024	0.9099837531243092	-0.06909285385454954	4.602514540518261	0.10376241315406443	0.7473604718169287	0.814698582712443
RLOC_00000487	0.13894944008959048	3.859472983195162	0.35572460276633056	0.5508903232327208	0.6578599264357984	-0.2916798466333281	5.2510618723831035	2.8086197762585297	0.09375901113669499	0.17179836823083358
RLOC_00000488	0.13101626217590304	5.18180863881355	0.7697217525892337	0.3803031441489807	0.5008056205815352	0.1132833565967436	6.825373970538774	1.0987665220545695	0.2945369605722203	0.413691444688661
RLOC_00000490	0.6294643353533291	4.605985867903344	12.986450172155656	0.0003137532411444033	0.0012653789955950618	0.4382079050441319	6.212904703730469	11.843159349525745	0.0005787355241810606	0.002170826819713096
RLOC_00000491	0.024304009263253136	3.21039566849871	0.007421169558887719	0.9313501895801098	0.9530474988022218	0.128813518873057	4.802944515749368	0.41724862782016314	0.5183131279703906	0.6251042732708527
RLOC_00000492	0.35848880690787055	4.979040162306142	5.145113798972389	0.023311882420068014	0.05588676447724914	0.36356620720342464	6.246442403016322	8.342636065995343	0.0038725369484160334	0.01196757506858013
RLOC_00000494	-0.01712586342757468	2.5801967280651983	0.0025180962095938675	0.9599784425013329	0.9727658001331074	0.18635563221009274	4.339129445892568	0.6350351329583133	0.42551438673331116	0.5417748661548671
RLOC_00000504	-0.05086642495819086	3.861358834165132	0.04925523982686553	0.8243643161450749	0.8768162706069904	0.16237176433228176	5.4351843110570695	1.0089089381085494	0.31516436560976424	0.4335006779165354
RLOC_00000514	0.351414913409278	4.5121225098562645	3.8759431886188462	0.048982780336048554	0.1025980103686827	0.6975954414541667	6.4008820891542	33.28982675061897	7.939690853456761e-09	4.9412456591845014e-08
RLOC_00000516	-0.5870941827578562	2.322903848094604	2.6383736593802682	0.10431027585399841	0.18620838666927353	-0.6229298754098302	3.918740147931873	5.218644742536682	0.02234595964597643	0.05388383792446177
RLOC_00000517	0.48682539292139737	4.323703697511088	5.23190170643562	0.02217627319744492	0.05355567426426887	-0.2799976532459444	5.940444833435481	4.079577513955293	0.04340451030304873	0.09219177699205111
RLOC_00000518	0.6151251305162725	4.505222666854478	11.613383779605186	0.0006547891376365701	0.002478895191817062	0.23788591978407958	5.8945552636380265	2.895746238864458	0.0888136402270449	0.16474459518440712
RLOC_00000520	1.6693020000856336	5.968215807160346	148.86032346752648	3.076607097557353e-34	1.0156673367973928e-32	0.8552898933097333	7.241785143347831	70.5419191411221	4.5058950208624044e-17	4.726013169234204e-16
RLOC_00000521	0.17578973830058534	2.205596649525831	0.21234397090619894	0.6449363942869044	0.7390393308192308	-0.5720660894073921	3.9392904431080735	4.478555065066228	0.034322727289336975	0.07610439573616662
RLOC_00000524	1.326838869067123	4.46573705573244	45.97651062090235	1.1967937747804224e-11	1.0374848098798409e-10	1.1215762102273825	6.0516161562127095	66.84614328830634	2.935459640391906e-16	2.952048923800251e-15
RLOC_00000526	-0.7907137211352494	3.0821284066567207	7.677891334147127	0.005590145182912927	0.016657775796258843	-0.4045136730335077	4.7310736914508045	3.8429989355507255	0.049954096882803126	0.10340458658764788
RLOC_00000532	0.6049386417007434	4.7091364246460135	11.623208454612975	0.0006513394750898437	0.0024676152325850517	0.247071530806484	6.357634118717085	4.136888235260755	0.04195823252534324	0.08977368723936799
RLOC_00000534	0.29491891499867695	4.870630905547921	3.3312727000174203	0.06797425654889179	0.13380719018381135	0.15862228809592296	6.338373117121136	1.684681198316146	0.19430359084793128	0.3000431534508649
RLOC_00000538	-0.13779328357171414	3.558733248917625	0.32476157371661807	0.5687600671178487	0.6726952664041432	0.2137812034328277	4.603267065090868	0.9967876023601576	0.31808906456466485	0.43643715223005963
RLOC_00000539	-0.13779328357171414	3.558733248917625	0.32476157371661807	0.5687600671178487	0.6726952664041432	0.2137812034328277	4.603267065090868	0.9967876023601576	0.31808906456466485	0.43643715223005963
RLOC_00000544	0.17412890603008055	4.84159946687637	1.129174308922654	0.287951528809125	0.4063057996556713	0.04315605854344452	6.142225105039959	0.11026855240414601	0.7398385996613719	0.8092056941186315
RLOC_00000560	0.16145199627966705	2.816371008228457	0.26455657691194145	0.6070068653438365	0.7074109760634543	0.2005844876613531	4.702658775062898	0.9431666702380355	0.33146478352760844	0.450608411531317
RLOC_00000573	-0.41944567584362435	5.389028839373386	8.421294893951206	0.0037085158224626344	0.011666766288346639	-0.26717167447770573	7.011107194409137	6.549240641112849	0.010492893205813442	0.028400331468892842
RLOC_00000574	1.4775622215623814	6.685471349958685	132.20513395533402	1.3493068877679234e-30	3.660212844389576e-29	1.146954036826971	7.96376498509183	147.16968590533992	7.205053027353998e-34	1.5858669126664492e-32
RLOC_00000575	0.564492742691378	4.8566741263283095	11.515406540779871	0.0006902173475255263	0.0026045656773267343	0.4578403682511322	6.2722413461037165	13.409894821848544	0.0002503004485672367	0.0010049347646299879
RLOC_00000577	-0.22757407806588434	3.498511446253291	0.8341900489549485	0.3610637242039929	0.4822115620669471	-0.2340499236752552	5.317969107872087	1.8948763002913118	0.1686529470612116	0.2682453099826784
RLOC_00000579	-0.4752008154556063	3.135289520807151	2.7391227705662087	0.09791850642951958	0.17790731749690145	-0.4031281477700916	4.887645703754835	4.250306908334711	0.03924323783699086	0.08495149568052929
RLOC_00000581	1.0257223383322638	5.256107577588748	44.27323025912838	2.8559509024117462e-11	2.402385622878086e-10	0.7461758708715776	6.80128715964297	46.287003206551105	1.021392346424156e-11	7.793312678130243e-11
RLOC_00000583	0.29062222339499494	3.8885412820041396	1.67686070859779	0.19534211325835205	0.30394271601988737	0.14725199730976282	5.788572707709152	1.0437724099933714	0.30694572934227315	0.4256535744768889
RLOC_00000584	2.19508331926859	6.68246463225309	288.48135922944795	1.0652642166509226e-64	2.3793922864683798e-62	1.8444835499166834	7.930926939103024	349.71765690039786	4.882293517126179e-78	5.511741896377178e-76
RLOC_00000587	0.010521875170737206	4.478854880770532	0.0034087467080148315	0.9534423822848233	0.9683860419142875	0.17149482701316876	5.744665412258476	1.3801282862870687	0.2400792967248116	0.3535688787086263
RLOC_00000589	1.4710056255031818	6.281589597729863	136.13085161150386	1.8680532090853733e-31	5.3290278774397416e-30	0.9122436034291712	7.551957470460106	86.92014025370283	1.1299283271025587e-20	1.4022597525117925e-19
RLOC_00000590	-0.013740078543215292	2.9235421016554053	0.0020659243285099382	0.9637466828379868	0.9753861531131623	0.3645779935513233	4.472317867082866	2.655512650099764	0.10319148347055128	0.18485678397627778
RLOC_00000594	0.07338111251901208	3.262704357614549	0.07428337397414442	0.7851993326131753	0.8491833309748753	-0.025750132504357818	4.302754354947669	0.011793758233714868	0.9135204975891561	0.9408526294083334
RLOC_00000597	-0.3312664023145017	3.2654131807021347	1.5117133293563523	0.21887783355566381	0.3304731046551645	-0.003776358573387813	5.002394812340137	0.0004060891122239438	0.9839223954875662	0.9891118960311717
RLOC_00000600	-0.30135442495838366	3.3370593579762273	1.2452588598330578	0.26445994509129084	0.3802852506627779	-0.10205813970223257	4.907997557639316	0.2790027359989127	0.5973556049870316	0.6936883637605181
RLOC_00000603	-0.7083313582450685	3.4506451258368327	7.3529519361710705	0.006695273469845153	0.01950790477003453	-0.5398570544354283	5.207181395026567	9.206140346858236	0.0024120469714310924	0.007871955596224755
RLOC_00000605	-0.29817003511677226	4.211132830252764	2.2944509120963232	0.1298371193629881	0.22163090716628442	-0.44612585318133124	5.786676442010496	9.407424876418139	0.0021610852321710954	0.007134979198919601
RLOC_00000608	0.6267447744115089	4.619942726188227	12.924961161558953	0.0003242293823746521	0.001303623154411757	0.7466007056237147	6.025819767616039	30.116374248064645	4.0688120321173525e-08	2.4039649704670837e-07
RLOC_00000612	0.6322474701741035	5.488838605230523	19.502103858390512	1.0048894421944997e-05	5.088919133698919e-05	0.3745764886758598	6.938102265120468	12.555688792941414	0.0003950019766756524	0.0015291761626540098
RLOC_00000617	-0.7125634106163284	3.0770294343455884	5.973286311567	0.014524188505712226	0.03770398885582763	-0.48877190816721755	4.83440785738165	5.996479616515048	0.014334453484369682	0.03724261992882883
RLOC_00000618	-0.4966751063328887	3.3457547638835634	3.36220347764157	0.0667087535668922	0.13186000657978428	-0.2604058975257016	4.769476522255158	1.6496180182823972	0.1990109288165096	0.30560417458600764
RLOC_00000619	-0.14059882167111756	3.7685708144610786	0.36185198885347836	0.5474794830960908	0.6547550254662522	-0.1584054333684837	5.32657043709636	0.8750208354306028	0.3495690689253244	0.468786007746453
RLOC_00000620	0.6034772803087556	3.8244371171339426	6.622713881454301	0.010068629499927973	0.027684775403416413	0.004480984113835573	5.198779310527915	0.0006477570867802207	0.9796951743915698	0.9862709402566968
RLOC_00000621	1.2363790890411928	5.855172135087	81.8967298789865	1.4338634264202212e-19	2.0994000349455345e-18	1.054889323879512	6.937541846407598	95.66527229221242	1.3604612567655341e-22	1.8646844301281125e-21
RLOC_00000623	0.5531958502715909	4.673013002665537	10.20597223430806	0.001399865729218624	0.004896964486950055	0.32497588712951825	6.16438032550544	6.33594475273788	0.011831507756614588	0.03151512013322496
RLOC_00000624	0.6644422815457419	4.803904815890478	15.884205274107101	6.733835434073878e-05	0.00030496895766569276	-0.047679670643102794	6.0255986790051805	0.12493703131283196	0.7237403669889585	0.7968092161884127
RLOC_00000629	-0.20248467021853372	4.633617480587111	1.3954255882090751	0.237490980279992	0.35130059334639363	-0.18016652997780744	5.867550419263052	1.6264512032382576	0.20219460047458757	0.30936186394384946
RLOC_00000635	-0.38734901495263074	2.896739688359425	1.6138165267113305	0.20395614483248992	0.3140410103331592	-0.23324135939198756	4.702935195981291	1.2637853434508872	0.26093579108363246	0.3774001709180065
RLOC_00000637	0.060074430136511446	2.6390593055780536	0.03274806526645202	0.8563956251377286	0.9003947193486104	0.3721852128170347	4.353149161007943	2.552186948529199	0.11014170160230256	0.19418601597356416
RLOC_00000638	-0.14319749178671318	4.411680910472654	0.5780565976098684	0.4470750823808882	0.5643133599656804	-0.38046356517448726	5.86525628616926	7.181448342470453	0.007366122046179294	0.020992648035514767
RLOC_00000639	-0.32993481472892644	3.524044573032611	1.7390232320214585	0.18726263729863163	0.2942058016104512	-0.15087214852396305	5.049033617109054	0.6632450872078266	0.4154166377597411	0.5318853628730926
RLOC_00000641	0.9965484307987663	5.201785834263521	40.68184028330903	1.791442856224944e-10	1.4225845011081288e-09	0.8267477336060084	6.3835133409950995	45.88496005713403	1.2540505068814879e-11	9.520084072124903e-11
RLOC_00000643	0.07142005874587518	4.204006890625201	0.12025877930110163	0.7287539918617622	0.806075166638371	0.3346030794740334	5.844381659406757	5.5577850205661115	0.01839867842494374	0.045828641704266745
RLOC_00000645	0.42014929693540715	4.79664661727864	5.606580950036736	0.017893142922342266	0.045024500095577444	0.25229249262756265	6.157664684220941	3.8107930064413758	0.050923335645155464	0.10510007881629392
RLOC_00000648	0.40192759430381386	4.845056116175736	6.05221483710869	0.013888864656144433	0.0362880291588363	0.34685334532561063	6.626038969961098	9.420302918023571	0.0021459606879796035	0.007091734738148523
RLOC_00000652	0.561535841527684	2.8136727000107604	3.0217671709014087	0.08215389974732781	0.1557615386576571	-0.5486168579858323	4.267602930916856	5.10873901483334	0.023805616412953933	0.05645700626148709
RLOC_00000654	0.04106562598962933	3.381392521557597	0.02521718764775538	0.8738270748364793	0.9127594032792399	-0.3175211107507407	5.046250404671916	2.9152145441227377	0.0877477421167758	0.1631999193062939
RLOC_00000656	-0.4099615246642072	4.5583550662712	5.5490178169177256	0.01849106020747706	0.04624086471131352	-0.22070068321626182	6.33662774000304	3.2400924359584575	0.0718565839964844	0.13883369072121635
RLOC_00000658	0.2434367768844375	3.5892508159493812	0.9995843095148798	0.3174111137012194	0.43689286372563274	0.003063795104728472	5.075499240163842	0.0002789977383425013	0.9866733740337432	0.9910906244002889
RLOC_00000659	0.34224848065772967	5.100967334598018	4.931195513890341	0.02637606394045916	0.06196840933406247	0.35624607262757113	6.665084434373449	10.093522142871516	0.0014879144009654105	0.005115132054923329
RLOC_00000660	0.954344639069851	5.235669937513931	39.23076960383503	3.765589320190646e-10	2.917428537517447e-09	0.8241067468960903	6.752483262322365	54.95409227053535	1.2337822720846524e-13	1.0617606618538333e-12
RLOC_00000661	-0.20220587384001065	3.9187167930003413	0.8664332381193753	0.35194463529611836	0.47319605293783945	0.042200887987015184	5.33434866671146	0.06278688551139266	0.8021441705061051	0.8573113105505921
RLOC_00000665	-0.06862436650601442	4.902627533247175	0.18359070618309525	0.6683054324971944	0.7584538381823186	-0.010177795088774068	6.480017983800401	0.0075545967846544215	0.9307373407661044	0.9515856948509819
RLOC_00000666	-0.32883775353395794	4.078824666552764	2.4040270948743085	0.12102334433714391	0.2092741012767809	-0.1963859671103262	5.277747105400837	1.3014138900920216	0.2539551217631716	0.36916259073123997
RLOC_00000669	1.3246219022033152	6.605452099321406	118.35732631751932	1.448040599529299e-27	3.378117825301907e-26	1.4594592142243221	7.999096402139555	232.44948635954293	1.7424586610729216e-52	7.719018347090549e-51
RLOC_00000670	-0.13336577590595616	3.951707476296386	0.3794994899274373	0.5378712226309984	0.6456176646673017	-0.21014901534997185	5.706583905231359	2.0122067718901295	0.15603820360667556	0.25246495602812247
RLOC_00000671	-0.38323646621893154	3.8405971711647844	2.6121581471051254	0.10604735396913151	0.18872438073706435	0.1677996004430749	5.730136851710356	1.3104689128698617	0.25230977368941127	0.367549132179793
RLOC_00000672	1.805819484716566	7.11180818384691	219.13753470923726	1.3947966830059672e-49	1.1177538609310415e-47	1.4158464486354132	8.536704000385212	239.8499160997671	4.240631704722406e-54	1.9700173569858645e-52
RLOC_00000677	0.037512365456365694	3.5415769484818416	0.023562147552074864	0.8780042534488394	0.9156853420133038	-0.20999047304720553	4.899574277210891	1.1725521924540085	0.278877453627105	0.3969004182772096
RLOC_00000680	-0.029968024749415057	4.523899381007496	0.027201248947601897	0.8690006443921401	0.9098260507282253	0.4812968852549459	6.262380794585618	14.702246126597757	0.00012589635701165062	0.0005299863080454369
RLOC_00000681	0.2535824378205094	4.5208371423470535	2.0126932817795495	0.1559881838910661	0.25535068680623924	0.13588941886798064	5.977409634248414	0.9901805264395012	0.3196982562582884	0.43812974708990604
RLOC_00000685	0.4686497398726664	4.323789853755859	5.632149599766738	0.017633994330324296	0.044532516834194	0.2914811649335584	5.954589754304496	4.492648025393141	0.03404091016286003	0.07560725953032948
RLOC_00000687	2.0085626862655612	6.332669948494927	196.96069193374527	9.618376697033016e-45	5.672680818283855e-43	1.789033187003101	7.728686456899257	317.3370817439346	5.507442303142753e-71	4.73956038858162e-69
RLOC_00000692	-0.5244024762363436	3.589238081816037	4.6116305674126465	0.031755824415949645	0.0721585811079306	0.019023097714545082	5.484954883114686	0.014375483671203337	0.9045641031991047	0.9339161982132927
RLOC_00000695	0.2738405732783694	4.105093977198193	1.7118205454149846	0.19074933432442318	0.2983442359561672	0.1394173202396388	5.669439266685886	0.8729475780900593	0.35014058488981203	0.46943251190884133
RLOC_00000696	0.921166649553023	5.842544608138304	42.45723559574668	7.224465561466258e-11	5.925190583146311e-10	1.0353148364043607	7.388172525439289	106.11095926846654	6.971998600838121e-25	1.054740825795381e-23
RLOC_00000702	1.8559000090491966	6.02942126158338	180.0083479370996	4.826114530393774e-41	2.389837280192162e-39	1.076022700655022	7.173083828574888	107.48256294218406	3.4896220392150185e-25	5.3878737926056585e-24
RLOC_00000703	0.11440929658736844	4.83454883862973	0.4941367187149903	0.48208778915846673	0.5963187946960745	-0.22356096749780535	6.363476337225141	3.3779427298204174	0.06607448307928665	0.12963504372742915
RLOC_00000707	-0.32317356531179403	3.9478267166962113	2.258347030175659	0.13289584491738737	0.22549548730284993	-0.11080380774680647	5.5455441688366145	0.5092220957319471	0.47547579890991687	0.5884041033421992
RLOC_00000708	0.19432628524604967	2.169191685692463	0.24794745895827752	0.6185240571128052	0.7166168802086116	-0.46113084462929704	3.8491560058854	2.768981813705192	0.09610727660013892	0.1753615392813449
RLOC_00000711	0.024086815800856802	3.895038354423977	0.0113814114005244	0.9150399159697415	0.9417734350833674	-0.1340058816329936	5.330252652048883	0.6284489009639818	0.42792483861002595	0.5439863034951764
RLOC_00000712	-0.5048544463533564	3.9272417102891373	5.102774463931448	0.023887605680944585	0.05701957354219105	0.282574849241653	5.090873109544063	2.395412835297006	0.12169162048224007	0.20979315655879122
RLOC_00000716	-0.1671843124945224	4.198112694373035	0.6843129885067754	0.40810550663437	0.5277521074953949	-0.04363240510310932	5.742439491341104	0.08923062053101471	0.7651575501933932	0.8280137208287399
RLOC_00000717	0.18287029326981913	3.0587644277099075	0.39407532069993967	0.5301649812079189	0.6386313221710537	-0.4136197350224473	4.694666515074808	3.916871648610292	0.04780375772568652	0.09956192270620567
RLOC_00000719	0.9708050106633862	5.679724794095426	48.3065965338529	3.6452389944279334e-12	3.2707452105559354e-11	0.7091560874653678	6.854076482400493	42.83094894668632	5.968046398533152e-11	4.345250980457667e-10
RLOC_00000724	-0.2744090901931344	3.4405063853577382	1.1619353869130529	0.28106451958450657	0.3988395953768789	-0.3432808254174949	5.028765831743703	3.3660809055642975	0.06655189705294011	0.13030576707079478
RLOC_00000727	-0.3199931375016904	2.6437888644781107	0.9558029578863392	0.3282465896976994	0.44816396132740904	-0.3191345302418153	4.052655955185637	1.5235818248008965	0.21707826005358605	0.3270690296862097
RLOC_00000729	-0.45372584372986596	3.922665514922176	4.365659836886872	0.0366702789287455	0.08092130309650444	-0.09161351498701993	5.364944690641983	0.3024164786105894	0.5823714567090501	0.6800487069278519
RLOC_00000732	0.04096845324721028	2.9362728579813058	0.01818825836663107	0.8927195209240296	0.9264303608798401	-0.08017727407263826	4.747903812186975	0.15503395088850463	0.6937704152806121	0.7731552478538527
RLOC_00000735	-0.2670460965497477	3.675283507374049	1.27205767994259	0.2593810152196317	0.37496308148935464	-0.1462796065458597	5.353395290988633	0.7626647466255763	0.3824958814478911	0.5006013786239601
RLOC_00000737	0.3633533535333185	3.2457632695741405	1.7150462630092225	0.1903319505059082	0.29804666115916234	-0.34871065407152085	4.443989486724535	2.352987335796358	0.12504317825259395	0.21398285613550957
RLOC_00000741	-0.7425142656972074	4.054321470224685	12.266546431313289	0.000461150909227355	0.0018010276209333232	-0.3174938468900922	5.478861166165959	3.9446708275032067	0.04702005208278038	0.09829763336169299
RLOC_00000744	-0.07717651192728173	4.155416979683515	0.14314711312288964	0.7051721862153432	0.7880453066732673	-0.01850866389950939	5.612355950264124	0.014839102003953997	0.9030448587007173	0.9329005186951521
RLOC_00000745	0.01885323771439013	4.704628673424771	0.01152037982646803	0.9145247798998769	0.9415060425500142	-0.24222476079242558	6.3193502499856224	3.8524179319843217	0.04967433081318668	0.1029879145354753
RLOC_00000747	0.5166578512771506	4.2297732640360985	6.668218021554853	0.00981472728726472	0.027078845482708284	0.6222899327787951	5.706520479546575	17.56606913437399	2.774958038809387e-05	0.00012694677320026037
RLOC_00000748	0.6812199021730583	4.016757373323181	9.599609157995838	0.0019461878927182464	0.006599186207285578	-0.21729205142325075	5.254676745284645	1.5680310066835679	0.21049318981207396	0.31940569444095457
RLOC_00000752	-0.29669036783604363	4.455646671940352	2.742247938490583	0.09772720348023113	0.1776344833795973	-0.07925502563441832	6.062842660434886	0.3528384531253437	0.5525107318747963	0.6543497094138169
RLOC_00000754	-0.6013419912040832	4.0111331401881385	7.981866915264485	0.004724819243999141	0.014381314126849227	-0.30074005451381813	5.585052914353099	3.8200405441592657	0.05064301271228856	0.10466554930439323
RLOC_00000756	0.8945639489836307	4.510297672365798	23.266970872034154	1.4100073862184648e-06	7.962483884088996e-06	0.6620178539315372	5.911584912490335	22.31137500579944	2.3182928425686682e-06	1.1832647814355103e-05
RLOC_00000761	0.7147913851556021	4.921421800291123	17.983407680918447	2.2283886795077627e-05	0.00010765588751713065	0.5735294049625367	6.311711701958536	21.463876893600826	3.60557209430252e-06	1.7923722262349505e-05
RLOC_00000766	0.5254042481738027	5.740261236503453	15.658914365607272	7.585418820568405e-05	0.00034162044949947285	0.5558406782430378	7.228770172794656	30.165559047983088	3.966918563716883e-08	2.3450832207468218e-07
RLOC_00000768	0.2669314712078993	4.092415409857582	1.585960762696498	0.207904178706328	0.3181600682301795	-0.19511780835903925	5.330086600451801	1.3292605249590261	0.24893681375950538	0.363654877926958
RLOC_00000773	0.34130975189197915	4.0810088771011905	2.531972274854592	0.11156069643601403	0.19640519724723718	-0.08732663219448937	5.30569023978632	0.2627777708556591	0.6082181794489532	0.7032690160831012
RLOC_00000776	-0.245203707723435	3.8824360933727333	1.2330303151084407	0.26681852237710924	0.3826063171581605	0.0028662172308410584	5.613936767552823	0.0003566181657437273	0.9849333749615742	0.9898358862564915
RLOC_00000778	-0.6400270873879434	1.6342061928309852	2.0076904004174043	0.15650341753604594	0.2559147783946122	-0.30508045565278474	3.5379686966638317	0.9988917223067952	0.3175788273055414	0.43602198350737265
RLOC_00000783	-0.10395683653069754	4.277804513562549	0.2878048018814816	0.5916307111127328	0.6934947750403605	-0.4930929225579047	5.9621456918064695	12.660388792458141	0.00037348454006828934	0.0014528396391911707
RLOC_00000784	0.33422987326807485	5.419017323927748	5.463427466135812	0.019418520639517864	0.04817004481891742	0.3888176232144292	7.040221461143542	14.066769906010567	0.00017643354898261703	0.0007278490494178766
RLOC_00000786	-0.18118555897098657	2.1370173572100994	0.22363125690767682	0.6362869035229437	0.7316254012249576	-0.2238893386986613	3.5245475906791364	0.5356422672938157	0.46424434451696	0.5773633467286855
RLOC_00000787	1.7056635637598596	5.90431198690139	152.07910586997914	6.088871589543467e-35	2.1096031005619573e-33	1.744244548314096	7.132971791259233	257.83803898901647	5.079014423528978e-58	2.706831087950799e-56
RLOC_00000790	0.2196651319903947	3.22042326508022	0.6158787168071003	0.4325829163480574	0.5511155390357814	0.43003726117880103	4.788079147702753	4.583532893019186	0.032280594605665056	0.07243299054603065
RLOC_00000791	1.7216156891008927	6.404088284194407	184.55218930123297	4.915407925397064e-42	2.580097620040919e-40	1.6109906163825967	7.7833832102793	267.19212577922724	4.6439212879067495e-60	2.621318795792095e-58
RLOC_00000794	-0.16966642979180832	3.6988633891346314	0.5351191021355093	0.46446259796315253	0.580191379511801	-0.3330577738382884	4.758949108813381	2.667814411284642	0.10239655257314964	0.1838654704062764
RLOC_00000797	0.2767303342655826	4.7574576240129804	2.7338072149910104	0.09824482983903376	0.17843844699830042	0.36855733753203196	5.919144841116478	7.0371633290880204	0.007983537936387461	0.02252597817633216
RLOC_00000800	-0.08084212558457889	3.340072772592106	0.0905113840201679	0.7635280406787331	0.8324350785175346	-0.21839326589102173	4.960175423702882	1.3143401200563396	0.2516103539380977	0.3667172651059199
RLOC_00000802	0.008874716099115073	3.2213053260014854	0.0008225705847060283	0.9771194156057932	0.9843392788628362	-0.7252914698763396	4.965552679603207	14.063271403458355	0.00017676205377432198	0.0007289178329051872
RLOC_00000803	0.814439397305128	1.739041715724401	2.632435739493701	0.10470098199002403	0.18680334958043376	-0.7756030870035652	3.612062400982013	6.526327091417422	0.010628921327182595	0.028642978699715108
RLOC_00000804	0.49855219056792044	4.191363795319115	6.072294567477614	0.013731845895471691	0.035940393470621244	0.07535801291848158	5.583078808382554	0.24227999082101248	0.6225642133125374	0.7145060860918594
RLOC_00000805	-0.3585332922956021	2.3068455377091466	0.9681978885979909	0.32513003184556577	0.4450084842652867	-0.14962221782961346	3.4857923976197704	0.23385465522123106	0.6286802733176383	0.7190077733308686
RLOC_00000808	1.7313735213493355	6.127213949837331	169.45097178992805	9.751711265676421e-39	4.111384131207673e-37	1.8405185515442237	7.375119101107518	305.1975561300223	2.4290181191448565e-68	1.889056387622359e-66
RLOC_00000809	-0.4186379947531267	2.3992095140058725	1.386568171864695	0.23898550921605413	0.35281533901703505	0.034049233278564316	3.8491744566801827	0.015413889938195702	0.9011943818266855	0.9311721105007746
RLOC_00000810	-0.3619730823362774	3.18299898848566	1.7288583400329474	0.18855676376241098	0.2957963099189765	-0.770669352187847	4.744366217311226	13.679930418517944	0.00021675863855646096	0.0008803670971776727
RLOC_00000811	-0.48427496533923803	4.909785080456231	8.593801574356988	0.0033730911614167293	0.010720772331986927	-0.26310758396018463	6.303261844161707	4.501919337271289	0.03385683127102917	0.07530993040562188
RLOC_00000814	-0.24809350513769507	3.872349663719097	1.2732119869165213	0.25916497711118197	0.3748056109261866	-0.02187165946288219	5.15230869110297	0.014957435358033067	0.9026609613756709	0.9325956931197764
RLOC_00000815	1.168026450136191	7.018151910979932	95.13619818855582	1.777269972557891e-22	3.1148213976482035e-21	0.9712192605540724	8.420494429922597	115.26054559484797	6.900820837175676e-27	1.1463879425554973e-25
RLOC_00000818	-0.017917947685543494	3.806729175960883	0.006321567050801918	0.9366283436647517	0.9566768195945284	-0.25513325302088746	5.301871389993975	2.227777211370853	0.13554872761315376	0.22711875059216427
RLOC_00000819	-0.3180156598168797	3.8546975337080487	2.0530721503028877	0.1518994093496121	0.2502042838581701	-0.02916587105984741	5.259201516551192	0.02849272243761014	0.8659556302348224	0.906086123364102
RLOC_00000820	-0.08388474041819845	2.6547138941174606	0.06561444753136714	0.7978325658439451	0.8586003358513312	-0.19390070384154892	4.587621787395362	0.8069535932054548	0.3690224573227612	0.48783263402564464
RLOC_00000821	-0.25250620415606345	3.394633553759745	0.9246912371378846	0.33624621395540943	0.4564148893333189	-0.1540217131999908	5.1578761383473175	0.7409903096864445	0.3893438311912779	0.5069338896607778
RLOC_00000823	0.19318573090650087	3.432331286950812	0.5567486791222844	0.45557322345559575	0.571715124908337	0.13187992241672356	5.509927660210468	0.7044147360155701	0.4013042432063294	0.5188265535583547
RLOC_00000825	1.147160971778697	5.882332290318895	75.03216136062893	4.631083946804229e-18	6.217022925006496e-17	0.9766284951235573	7.27335921661566	91.9768079812885	8.769825922340958e-22	1.1567135974705743e-20
RLOC_00000826	-0.25194887740719757	3.6815109603487293	1.1691326281580185	0.2795795337494549	0.39726934830830773	-0.134950326564118	5.09981178198707	0.5482981089807271	0.4590139208445143	0.572146165849051
RLOC_00000828	0.57025577593626	3.8064265231386143	5.670898436278858	0.017248619869306522	0.04370649562828382	0.29283815936601587	5.295814742949761	2.942574580561211	0.08627312123903008	0.1610564544609845
RLOC_00000829	0.625550236012158	4.764206682749167	11.928392781244433	0.0005528485147575712	0.002115859900811149	0.4035433383207756	6.27419913263334	10.445191897846112	0.0012296913063360732	0.004304944656626353
RLOC_00000831	1.1229337901794814	4.944446397702034	43.331949850038704	4.6197823344736945e-11	3.839942592819069e-10	0.8938431100449534	6.46271698671943	55.985602525489035	7.300367825341684e-14	6.323973745731217e-13
RLOC_00000833	2.6310270379300804	7.698714836277721	410.0635918289226	3.5504562488389455e-91	1.242422990010375e-87	2.389196967338301	8.869453462182026	633.1100567808774	1.052967882462729e-139	1.0050099816341993e-136
RLOC_00000840	0.06323294874473127	3.9805720548588326	0.08640483824900436	0.7687984036288322	0.8362497827371932	-0.1909989942362593	6.021699090882707	1.9931164410681674	0.15801540915449538	0.25460463178530496
RLOC_00000844	0.9269240088364349	4.663736477952402	27.882305523526075	1.289233920023073e-07	8.104417779881569e-07	0.6821967546440556	6.123526848888003	26.770700678933967	2.2908447240015322e-07	1.279339295600643e-06
RLOC_00000845	1.2596928557019584	5.662918560361385	79.33142688478556	5.251763810744737e-19	7.46048937553427e-18	0.8899027090371066	6.9633971459661215	69.70362511880987	6.891932285798395e-17	7.178412407598943e-16
RLOC_00000852	0.20395503752222446	2.333887262783976	0.290383689297796	0.5899747580386646	0.6920357349621747	0.026134804144638056	3.564832530495857	0.0075541352060017886	0.9307394514167762	0.9515856948509819
RLOC_00000853	1.0039136638788586	5.628606444235188	51.98203935447998	5.601062624397673e-13	5.3600688633479275e-12	0.8966569741997186	7.096772373368739	74.01811578648848	7.740341494165604e-18	8.43882090833278e-17
RLOC_00000854	-0.30098821628713707	3.855730863758143	1.808843212615292	0.1786470597260573	0.28346989616144946	-0.11805035473802004	5.5493969322028285	0.5783967621010402	0.4469414260119918	0.5609836538462245
RLOC_00000855	1.0554800298609008	5.15348683380825	42.63198436301473	6.607015128617504e-11	5.43577153763531e-10	0.9695501291195966	6.452924108750193	65.0995982206934	7.120659001405313e-16	6.993433008021925e-15
RLOC_00000857	-0.830870201730938	4.078415020174331	15.183279473868925	9.756349591916636e-05	0.0004316146566200625	-0.27416709132924244	5.7422141616658715	3.488924582667382	0.06178070671731431	0.1225922585191992
RLOC_00000859	0.04031647949489471	3.5752088294388336	0.027610732110123326	0.8680272803160779	0.9093454135074529	0.04923627770769131	4.753361082437258	0.0588476675158609	0.8083266065566183	0.8615041773029581
RLOC_00000870	0.012963570589000993	3.0797681881910814	0.002034545599819859	0.9640228687823948	0.9754517664074778	-0.11967952219860171	4.949970079743187	0.3938510019897934	0.5302820658008202	0.6349437550489534
RLOC_00000871	0.9822060953086144	4.258680383324247	22.00593169580893	2.7180913794486865e-06	1.4800944897869493e-05	0.46744791199917013	5.6698637970669274	9.752529667263847	0.0017907612103356984	0.006045402555406591
RLOC_00000872	-0.36092854333202845	2.400164791498962	1.0259614353630795	0.3111091014645615	0.4307601354754638	-0.2335465029894192	3.940315116406984	0.7630392420614274	0.38237907004179456	0.5005108909573371
RLOC_00000873	-0.055189602713560625	2.793530920084465	0.029849479477903174	0.8628322039613381	0.9056201236938739	-0.08727367098775765	4.090181849256337	0.11766780893556916	0.7315778342219166	0.802762926577749
RLOC_00000875	1.6568565600015854	7.016834026791774	180.41765104471128	3.9285358619716345e-41	1.9545862312311953e-39	1.154822691800572	8.161267356332187	154.5057493611798	1.7955759675830876e-35	4.134156158696236e-34
RLOC_00000878	1.2365651987320443	5.417100228727962	68.00285376568775	1.6325907789518118e-16	1.988275869772172e-15	1.368300216980521	6.759417422953914	144.24499648846052	3.14069919795315e-33	6.715723193342184e-32
RLOC_00000879	-0.5848077577945986	3.6213077877128925	5.884385548015159	0.015275727193765881	0.03939193910099588	0.13009191963661443	5.145004952825626	0.5272570530388689	0.4677623396101007	0.5808660071708761
RLOC_00000880	-0.024964477019980343	3.911962151427096	0.012783010771427072	0.9099814191563271	0.9388682986047294	-0.23483766668574022	5.937057976499168	2.868608881486873	0.09032291111466385	0.16671945214361036
RLOC_00000881	0.23815026070148312	3.60081644541614	0.932239552365826	0.3342816541922663	0.4543945106448804	-0.43898675876753324	4.95754436584165	5.244938698136467	0.02201070384843495	0.053197601221159886
RLOC_00000882	-0.33018340723003975	3.5737840132448544	1.838512150677162	0.17512543243601753	0.2792499896325449	-0.06559723027614117	4.91119938037494	0.11571692623267049	0.7337270730518997	0.8043646799594752
RLOC_00000883	0.7655279176379935	4.515053141036972	17.516725962906698	2.847912411511657e-05	0.000135835458864377	0.535481932314801	5.874215308686533	14.38703427357149	0.00014882351266792468	0.000621024665938212
RLOC_00000885	0.30166817002944557	4.307280263446086	2.342464879326701	0.12589021537132053	0.2159822652342087	0.13546320793640562	5.700680378636404	0.838552591011533	0.35981105885776016	0.4792763647484932
RLOC_00000886	0.33357757348263173	5.40340602048967	5.458202836324052	0.019476668814645094	0.04828006356933747	0.21721626662475546	6.828833392721357	4.046857915810019	0.04425364105845624	0.09365429902695667
RLOC_00000887	1.1691608763085162	5.702292106428659	68.144600980105	1.519349080692106e-16	1.8589891199423927e-15	0.6822349484041063	6.990929247382582	42.019103935141125	9.038605297247722e-11	6.508663718505063e-10
RLOC_00000888	-0.23546093393895792	3.2679561194434474	0.7632681582937453	0.3823076921149705	0.5027876123004843	-0.3145516187916595	4.5951631384811735	2.1208536433381457	0.1453055357363461	0.23904149478155717
RLOC_00000889	-0.2151494470000003	3.4144297214362025	0.7205465123928536	0.3959647016863993	0.5161849544646492	-0.3057677128921587	4.916895162627103	2.49860244776195	0.11394737503611449	0.19928927044880326
RLOC_00000890	0.2548352583492187	2.62688815977498	0.5788129716102717	0.4467779746351856	0.564054578700754	-0.4018419175213342	4.457163680147072	3.143330067973797	0.0762380035077394	0.14590280693178198
RLOC_00000896	0.9104667033225922	5.805236833444152	42.38539395388447	7.49476632971016e-11	6.13728993208247e-10	0.6528423519170979	7.3416749496678095	42.751762303627366	6.214587257203088e-11	4.5184869538348494e-10
RLOC_00000897	0.06005650678129979	5.561744906969151	0.19088877729063292	0.6621779231481735	0.7533099086702997	0.16980822116178537	7.098172860314959	2.7360135018225353	0.0981092415129974	0.17811670874026625
RLOC_00000899	0.06152318852286491	2.9793687608313197	0.0388561731243513	0.8437338734635037	0.8911880675741888	-0.38153010058773806	4.30681566479553	2.564372152018917	0.10929594185603804	0.19305149622250056
RLOC_00000900	0.08104798787422694	4.085880512328575	0.15101218615086176	0.6975699475927265	0.7817966595311672	0.19698189902589824	5.905082134986089	1.9972254992480565	0.1575874358926235	0.2541100429176247
RLOC_00000902	1.871217981705908	6.4312858608990515	205.3370743282049	1.4296750620879123e-46	9.439452076603084e-45	1.9655173423928243	8.068743251334599	402.40864895139447	1.6466675988299145e-89	2.7441846222405193e-87
RLOC_00000903	-0.12710932199930197	3.96700785086745	0.3422463891547576	0.5585354246805172	0.6641940290321783	-0.46091944367709875	5.347250251800719	7.422268167735337	0.006442155660523288	0.018637694207724993
RLOC_00000909	0.7628683287852804	5.087651475555024	22.016048864088187	2.7038016519628567e-06	1.4737543999120493e-05	0.12898564141709137	7.029435164685005	1.5486643411032452	0.21333272865137465	0.32278142644628655
RLOC_00000911	-0.05041247988115275	3.6345255169634987	0.045203637899676075	0.8316300228943275	0.8824878176836805	-0.16340030613858877	5.448759190504477	1.0262949089857276	0.31103047842146814	0.42946254950670265
RLOC_00000912	-0.6396501522075845	2.4747899341313935	3.427218232424457	0.06413003545724594	0.12775067501718104	-0.3457981446367163	4.149026190336732	1.8992476762360049	0.16816255217155335	0.2676061674332235
RLOC_00000914	0.3519009998456387	5.134221527330827	5.117677470696599	0.023683293642814497	0.05664780511785523	0.5150982468796992	6.775792147735138	22.076409859690592	2.6200989456991414e-06	1.3276263914524752e-05
RLOC_00000915	-0.5900057093101831	3.410231656027124	5.3425252901773	0.020811304206907147	0.05086776986358818	-0.2758062105969527	4.991299955313734	2.1325161201875176	0.14420387686446665	0.23786276562451458
RLOC_00000916	1.1401850613877624	5.049601044984539	41.94112139953276	9.406352049348087e-11	7.672718245070413e-10	0.7719647891883827	6.551408186857084	44.25240326262079	2.8864980528522354e-11	2.1402078430011032e-10
RLOC_00000918	0.017967148212742645	3.8387519656034277	0.006446790135032687	0.9360050956763913	0.9563193668526284	0.20908941542227896	5.289994928465055	1.4972397665826302	0.22109655783506962	0.33189773530317357
RLOC_00000923	-0.06841414792487412	2.4578463392982073	0.037295651181554756	0.846864347443345	0.8935955291446613	0.5582929616308158	3.940300004130458	4.367972492187286	0.03662053999457971	0.08036769427322164
RLOC_00000925	-0.5499472306984355	3.7924832111515694	5.817319941647179	0.01586910717796275	0.04066240838522161	-0.32003620450716685	5.741566255677971	4.748350476884378	0.029326393289988737	0.06708192117534108
RLOC_00000930	-0.45382433041075015	3.8471586410924763	4.154780843496821	0.041517146189458475	0.08953307327381575	-0.37880726333662	5.591740100198127	6.0581300271341	0.013842418289555874	0.03612516769128688
RLOC_00000931	-0.20604407905211816	4.260172977303455	1.1239900803559186	0.28906090585256783	0.40765198678670833	-0.09854167343475662	5.69756947912569	0.44254025141102904	0.505898925634616	0.613963894468822
RLOC_00000935	-0.3819532594237998	4.470406409218981	4.603955997664944	0.03189826981661896	0.07237377598613716	-0.07055853032121934	5.780984696808841	0.23809968780765223	0.6255820018225806	0.716698853398767
RLOC_00000939	0.6289366281906611	5.111516811261783	14.751820023423997	0.0001226290971683886	0.0005313084036622962	0.4834461052352198	6.2476954191438105	14.70613188350859	0.0001256371234890291	0.0005291071638633439
RLOC_00000940	1.0369573504450214	5.638179139780405	55.22613908575031	1.0743054808743932e-13	1.0865182021405953e-12	1.038786833368443	6.981745743325767	94.67185532564356	2.2471151758682654e-22	3.048121735328284e-21
RLOC_00000944	1.423277236787363	5.72073843045175	100.34078376812991	1.2830738503786058e-23	2.409608100406906e-22	1.2343729079071948	7.102727255245964	136.34565618135525	1.6765152229115104e-31	3.371979564242902e-30
RLOC_00000945	0.10706615550828298	4.204760884358551	0.2613067975683787	0.6092237855898136	0.7094432946335955	0.07482683647340503	4.286304186742552	0.09884810752046169	0.7532163533618259	0.8191710149137993
RLOC_00000948	0.7328018515830834	4.7720145809581815	18.659319280889555	1.5628151526158374e-05	7.698936401764928e-05	0.9217149125826555	6.028931453583134	45.34228851084783	1.6543811799637897e-11	1.2486950401466447e-10
RLOC_00000950	0.7911178950515675	5.494579162232422	30.40345728954039	3.509021996648118e-08	2.3110233952830582e-07	0.5356104518992568	7.097138034201638	26.9920204449537	2.0429710873195766e-07	1.147627257665502e-06
RLOC_00000951	0.748968190900823	4.499840289190175	16.672897620947957	4.441097295795463e-05	0.00020556719317134378	0.7954920930751332	6.159538240318236	37.05740303689387	1.1470227043241403e-09	7.683250904594005e-09
RLOC_00000953	0.4228886841633802	4.696733605818186	6.120006467320172	0.01336603117454289	0.035149447713013836	0.13295061443664175	6.1659146931497455	1.0641127740246912	0.3022790274203211	0.42136604968665176
RLOC_00000956	0.1807088453438281	5.644050212800351	1.7580702132473043	0.18486540218093214	0.2912240384296857	-0.11604807636873361	6.992537289700015	1.2329898599444564	0.26682636851575997	0.38375480041739235
RLOC_00000959	-0.2156453924003271	4.576794319915652	1.5353564538779354	0.215310313265196	0.3269676940052116	0.424587690047958	6.34911601155934	12.099916202265357	0.00050424089038758	0.0019153491708318385
RLOC_00000967	-0.13186461645001638	2.6965780522379914	0.14821129022875823	0.7002506073417183	0.7840443437107799	-0.05573092445155032	3.7079791525950148	0.037617136985482524	0.8462139536984283	0.8929045527517386
RLOC_00000969	1.0996537677599436	5.016719462263431	45.44336591346378	1.5711680886037276e-11	1.3453607336184283e-10	1.0492887128309598	6.661639491128541	84.21325770723563	4.441820462375459e-20	5.372658183695847e-19
RLOC_00000970	1.2044408690666617	5.124681286985618	55.74093919696036	8.267846381899251e-14	8.418608275187037e-13	0.5991132347615922	6.442780691962075	25.33449225386545	4.820119542976727e-07	2.601873268982656e-06
RLOC_00000971	0.6647893284453524	3.9578425394623586	8.902526844590266	0.0028477630944758916	0.009224257008888587	0.011844697850760897	5.379461581959306	0.005129958487220421	0.9429013559401185	0.9603726558028041
RLOC_00000974	-0.3298806184511162	2.5698269108184744	0.9463492590373748	0.33065030614959345	0.4505835994228613	-0.1042912302326594	4.079269213958174	0.16701859253995188	0.6827751862705541	0.7637392585397983
RLOC_00000975	-0.5116976984494481	4.726308946284901	9.536274495028742	0.002014502351448601	0.006784807727143861	-0.1689068359054649	6.325309263371894	1.8868648476602954	0.16955595994425632	0.2693551253525113
RLOC_00000976	-0.18563586429124526	3.984596557615253	0.7272966661937792	0.39376085007442485	0.5142404241224635	-0.092928769602507	5.66980407387868	0.3869648942216699	0.5338991122236811	0.6383385907256062
RLOC_00000981	-0.2797924748330943	5.536772076670197	4.093563681175445	0.0430467902998025	0.092131540176825	-0.2461284715405098	7.0902690383079	5.697208209822245	0.016991919713879432	0.043008236517844786
RLOC_00000985	0.26022180368535314	4.5049039560508675	2.0573184404194835	0.15147653298619815	0.24979589118584797	-0.10908426669925574	6.087049611370677	0.6779203245649894	0.4103037739882481	0.5270099489971393
RLOC_00000986	1.0128151989315677	4.655560170487363	32.6212860585532	1.1198159715168549e-08	7.70873971736652e-08	0.4430137535588652	6.056132623333909	10.946721020999108	0.0009376940855706721	0.0033738348884189465
RLOC_00000993	-0.5606864521938846	3.061932474733029	3.832754521045769	0.05026027078817694	0.10466818542636017	-0.007673657640613627	4.792373831247334	0.0014659413618112183	0.9694583663924154	0.9791187559998172
RLOC_00000994	-0.38257126562402827	3.051020950299427	1.7406410462232156	0.18705762244701177	0.29397169467795353	-0.7254248028723034	5.093682354885306	15.196152231175587	9.690066494892405e-05	0.0004144032917713864
RLOC_00000996	0.05019839155039624	3.065206800109265	0.02902024822589766	0.8647322932008069	0.9068080009476257	-0.39725452453071997	4.277054826682458	2.722932704870892	0.098916121529959	0.17920972561571002
RLOC_00000997	0.22585692295966273	4.277847483883898	1.2568007283278995	0.26225753892495857	0.3782879422415794	-0.18803088947599053	5.85998087991698	1.7632974864794093	0.18421374779823096	0.2877637461886069
RLOC_00001001	-0.12901459257281167	2.8412039564952623	0.1742349192254607	0.6763752030926331	0.7645727233839197	-0.13108238660562058	4.223291568049259	0.28961628751055635	0.5904665272110676	0.6874371334208249
RLOC_00001002	0.8652157091439451	5.551018730885156	35.811671637319975	2.1734194428936276e-09	1.5888967487115112e-08	0.6593237271000882	6.664524755936976	34.185600375784354	5.009829045926784e-09	3.178138679950774e-08
RLOC_00001004	-0.3266116016677184	4.215749259482297	2.7662261383448428	0.09627289502546563	0.17564700242915157	-0.1479821433412953	5.5576910065632585	0.9141551428035424	0.33901433551201055	0.458378816296278
RLOC_00001007	0.87442116864181	5.484137380567842	36.08991156434969	1.8841979625300194e-09	1.3842064528089672e-08	0.770101108470287	6.68247075984586	46.76204805291126	8.015066385321214e-12	6.151329092067794e-11
RLOC_00001009	-0.4856776881733682	3.1404817040374557	2.99691731195587	0.08342310953891535	0.1575592142531457	-0.09318316520346989	4.478068187148373	0.17387428811724348	0.6766913107989905	0.7590365461622437
RLOC_00001010	-0.5101424725377427	4.032448732420444	5.896821745688163	0.015168231652794326	0.039162837159624896	-0.36527740207405385	5.355530950066453	4.72688144097925	0.02969467969843592	0.06770129037000623
RLOC_00001011	-0.2455688604586827	2.950594233359249	0.6577592059874027	0.4173521441746863	0.5365372042059585	-0.4150408468404208	4.752380422928057	4.105172817577272	0.042752221989024716	0.09108270670916609
RLOC_00001014	0.6572332649229606	4.418877156741863	12.340550016379453	0.0004432244144113304	0.0017387779904671698	0.27514271229186865	5.965806452552201	4.030732772134391	0.04467853099469903	0.09438925081618542
RLOC_00001018	0.019552401861379742	4.607038419945165	0.012991571439407323	0.9092531921156976	0.938641282310771	-0.08433604561389084	5.947542173444143	0.37444402743952665	0.5405918016395101	0.6434889871770657
RLOC_00001021	1.0097340423250099	5.826575939760407	57.34904830344621	3.6493986000100033e-14	3.8007327879866085e-13	0.8291238247531474	7.318486033105378	67.8215262599662	1.7898472074704989e-16	1.8156140899741806e-15
RLOC_00001022	0.0790599616716808	3.3405539071444275	0.07710452979252835	0.781260299250453	0.846230976220724	-0.01725821208895265	4.949660066880379	0.00821523143235936	0.927780304987285	0.9500405171229401
RLOC_00001023	-0.3667726518058125	4.639680889451013	4.703412743530778	0.03010278678142767	0.06896967604352416	0.2564232459390486	6.042932349905095	3.6538943583961085	0.05593827106873078	0.11309376236291246
RLOC_00001024	-0.6154759110278352	3.424776554089479	5.836493612430215	0.015697078065799702	0.04029289985461022	0.01831063793591196	4.519307284187188	0.0069126606395455426	0.9337383028290333	0.9539085765692342
RLOC_00001025	0.6925771645399078	4.892410071700274	17.264238050110468	3.2525107017107223e-05	0.00015380566372323948	0.36648564188488253	6.157487393641372	8.009831599829635	0.00465240638824073	0.014104999904747163
RLOC_00001026	-0.28042652618689257	3.848670997849789	1.5482281436126941	0.21339720557918673	0.3245789429397714	-0.18301308654823875	5.339087826929603	1.1780321189790541	0.2777569814014083	0.3957886193992109
RLOC_00001028	0.3117601994421896	4.7532639609502345	3.473123284108306	0.06237343637152256	0.1250565956891222	-0.08449772806046987	6.18998887101858	0.434710124757129	0.5096867661656042	0.6172801197338422
RLOC_00001030	0.3892955485277859	4.792876676032906	5.128372476569437	0.023537788649610474	0.056376843541777494	0.26267146382093626	6.157601773087618	4.125865801714587	0.04223240505034802	0.09026832667418645
RLOC_00001033	-0.6638222675370257	2.2484627374395045	3.07137669813915	0.07968196622339078	0.1521464680635061	-0.6684717389168353	3.359236585051763	4.15043225777562	0.04162389690515143	0.08914918270240409
RLOC_00001035	0.6557789915407464	4.2590595787493815	10.90955641772913	0.0009566943149771644	0.0034788281671736306	0.06603059045408573	5.523034821089093	0.17822531396398977	0.6729028344522574	0.7560795011680491
RLOC_00001036	0.4400616210500492	4.826747113190295	6.7305087439090165	0.009477756418564853	0.026315124803515957	0.4386310316292924	6.563370576548748	14.599073206222908	0.00013297992841164374	0.000558462507357539
RLOC_00001037	0.37103591873045955	3.9390909238040575	2.8278300266050436	0.09264346126768352	0.1711670285793984	0.1926086053448008	5.434045993347097	1.4166591083691111	0.23395408107343132	0.3465411818834587
RLOC_00001041	0.8386968089160219	4.60860132773426	22.13735633766865	2.538221426027441e-06	1.3892726032552699e-05	0.6583233605883029	6.232817203723887	26.83658901902414	2.2140546006308804e-07	1.2404140475999793e-06
RLOC_00001045	1.5927642177045984	4.5013972604202905	67.16833204729659	2.4928645030353726e-16	3.0149875060904773e-15	1.1914035441928663	5.876789163768509	67.95025419947858	1.676727940666996e-16	1.70581072180841e-15
RLOC_00001046	1.0305456155345518	6.3178372300826275	72.39515914946217	1.7614550706428378e-17	2.3085836868425107e-16	1.06604466216288	7.745229696820001	122.29563807415519	1.9888078685877842e-28	3.485892122254281e-27
RLOC_00001055	-0.3342581834173291	4.558430372918449	3.6149450732300936	0.05726261261009006	0.11679481390727131	-0.24807151611483624	5.315868750251856	2.1231521826747928	0.14508766344392726	0.2388128735451008
RLOC_00001056	1.160536708956365	5.516535161695403	64.74786393959683	8.512184351610542e-16	9.984459365721505e-15	0.9569028183097379	7.0058863344841935	81.70118067903194	1.5829889782279261e-19	1.8548885359838165e-18
RLOC_00001057	0.03277299096708377	3.843340042634179	0.020841262848003694	0.8852122268873837	0.9211893296851461	-0.3482180547175287	5.136049752717215	3.701941095835185	0.05434920587537071	0.11070992301198072
RLOC_00001059	-0.17519724536289175	3.7872729457268606	0.6023692870579975	0.4376754609678883	0.555924620597809	-0.07698128761692037	4.8618892603533475	0.15444895808263803	0.6943195207750432	0.7735208667887498
RLOC_00001060	-0.6172653593187986	3.576140734706478	6.2326227266368806	0.012541784416095948	0.03329884997475348	-0.1817810349014453	5.209588423896572	1.0677313207967152	0.3014584494965004	0.4204878784726661
RLOC_00001063	-0.17447335310058185	3.9060733763264164	0.6375624668467365	0.42459484395173275	0.5437175740186986	-0.11852821002862246	5.583249778283132	0.5969185814379916	0.4397561479452145	0.5553283374160219
RLOC_00001065	0.43492542788187566	5.322582941056054	7.572396838930928	0.005926891601279507	0.017546674571413498	0.6800566002212667	6.81963133282354	38.92690876556907	4.3997388415999294e-10	3.0390038222340564e-09
RLOC_00001073	1.8736587874098942	7.095028198446471	227.1549382187674	2.487823577463188e-51	2.418256658908199e-49	1.5256530249446272	8.525091679585122	275.1344766054521	8.628010799837973e-62	5.176313450714222e-60
RLOC_00001074	0.0012266339726674446	2.4084959379652675	1.1257370019723822e-05	0.9973229423900694	0.9979883947393908	-0.21854306719439104	3.9974497513094067	0.6934734926426289	0.4049854240146552	0.5220950352074981
RLOC_00001075	-0.3110468119506874	3.0134707940784033	1.0899913119337157	0.2964731338704807	0.4158149578319715	-0.12428499308065646	4.6312852970245295	0.34247687366433244	0.5584030007759846	0.6597445485192676
RLOC_00001078	1.2193207694258799	6.565787352566107	98.94141983857874	2.6008241781547198e-23	4.748426473437957e-22	1.1793739288634892	7.77475216268616	149.4702156830446	2.263389507035879e-34	5.0668073420830904e-33
RLOC_00001080	-0.3328695820889505	2.7654215154210773	1.1110175406087217	0.29186086473060613	0.41082801795949353	-0.2808406695308687	4.767812635704751	1.9160802234907681	0.1662894188455547	0.2653301836564557
RLOC_00001084	-0.020786799156596154	2.284388948295922	0.0031429871001238396	0.9552921370015515	0.9695143903946526	-0.46094051166368283	3.562174973991042	2.2948822889272846	0.12980105098892047	0.22015851927829982
RLOC_00001091	1.602648147413048	6.466225026880836	165.8737981050438	5.894319532513112e-38	2.3350402434838736e-36	1.4725141961138823	7.733833865294912	224.07164218848942	1.1702824835718972e-50	4.7439366003943435e-49
RLOC_00001093	0.907662599605593	5.655753981671511	43.33467937506586	4.613342473118322e-11	3.837970690457209e-10	0.6462833600716015	7.262565958916098	41.030428660061794	1.4987750742006506e-10	1.058925942397889e-09
RLOC_00001096	-0.23369991478241411	3.649355334099881	0.9644925027079028	0.3260575844741074	0.44592919773439016	-0.2307219230936216	5.030231847639992	1.529491219146395	0.21618881973367532	0.3260770324728194
RLOC_00001097	-0.471744431092784	3.7924409182590177	3.94945874003821	0.046886446349405045	0.09889771223147562	-0.5477651116156875	5.390387024023268	10.788793377096972	0.0010211642408534945	0.0036479085963663964
RLOC_00001098	-0.7946450310589508	3.4605556123600794	9.568821568493465	0.001979097816109765	0.006693482240180513	-0.36003031832296717	4.92375071986133	3.473053826018057	0.06237605517783079	0.12361007990034834
RLOC_00001101	1.8881264149920134	6.383219151845634	210.84236402571125	8.996789580410566e-48	6.254854106963584e-46	1.520664815639873	7.519478686195343	226.09292178624784	4.2407467410509874e-51	1.7598260883120283e-49
RLOC_00001103	-0.11205735606391043	4.8536309792876	0.484296821197864	0.48648245259886974	0.6003400478879669	-0.1274511354449981	6.511850387086681	1.2053592892698801	0.27225315416410895	0.3897976088325351
RLOC_00001108	0.1625151400735922	3.535231779162352	0.43716388772736536	0.5084945119425569	0.6195575295335677	0.10173941060919331	5.044620340992983	0.3024527831223158	0.5823488164151197	0.6800487069278519
RLOC_00001110	1.713742022316157	6.243703691718985	169.6051688859699	9.024062910524847e-39	3.8199440497858804e-37	1.6740445501788273	7.738100176771723	283.1380771680578	1.5551350474709917e-63	9.89537143236239e-62
RLOC_00001113	-0.7212257824607832	3.0655342705569533	6.233457372421452	0.012535874587755883	0.033291578907731156	-0.24161701459862425	4.695312841320963	1.3494471661482004	0.2453747872099239	0.3593513587553342
RLOC_00001115	2.083316167697458	6.680285461756183	263.225134793715	3.400400725154424e-59	5.852033903716581e-57	1.5204765716676931	7.873731647130886	244.46636918606782	4.177093888390861e-55	2.0025255129778834e-53
RLOC_00001116	-0.44959810896434094	3.2721613235815923	2.810499945626286	0.09364918650510043	0.17272121572918908	0.07276019440816386	4.775800593682714	0.1305667820060683	0.7178451023066921	0.7921647812821064
RLOC_00001117	1.2779538615995725	5.310555414755527	67.49709417601659	2.109978395346142e-16	2.5607575947218262e-15	1.0966992819601413	6.665776594578751	91.53128585247245	1.0984174830164536e-21	1.437940792292986e-20
RLOC_00001119	-0.2809695860554163	3.5031250286538027	1.0883073318351855	0.29684655389778153	0.4161718914020981	-0.30202393980503944	5.00582541974262	2.575608725259995	0.10852234776990355	0.19204047349337897
RLOC_00001128	-0.6280825082538112	4.305694839312956	10.519952358725975	0.0011809252889515584	0.004212488509484696	-0.3444863442007837	5.774889531002786	5.601304417745337	0.017947110299843857	0.044959845153438475
RLOC_00001131	-0.6509605535411784	3.000154231260886	4.568681863280281	0.032561610584876305	0.07350347971123525	-0.07231164716343813	4.294845790494581	0.09250721423278474	0.7610136259032626	0.8247194527620101
RLOC_00001132	-0.06637828099730239	4.890450973011133	0.16344453707891127	0.6860048133249519	0.7728781423358386	-0.4672120109943299	6.343911502266244	14.397120333181476	0.00014802850648236378	0.00061795279902916
RLOC_00001134	-0.048250760238872724	3.240272065608648	0.0308850995717318	0.8604969750632202	0.9037112089049306	-0.034595265948628426	4.948371340333331	0.03299372798139899	0.8558638763749362	0.8993961160936721
RLOC_00001136	-0.5860863688237141	3.9020528234152643	6.842311461839334	0.008902357499226824	0.024935151821473638	-0.4885086576202593	5.372543441018969	8.49640167305305	0.0035584953107697117	0.011129175534039679
RLOC_00001137	-0.9931725508065036	3.552472817339689	16.33673165733335	5.302610992871104e-05	0.0002429804024581443	-0.3857372567604989	5.2561494909469255	4.909488933550682	0.026709542828245267	0.06201315571732575
RLOC_00001140	0.311123650712919	4.217386460714595	2.3106066048332314	0.12849389603260944	0.21961928385355198	-0.28636074934602107	5.4619425506742445	3.168019862069567	0.07509343807394962	0.14397480028093446
RLOC_00001141	0.691147352185343	4.246356969239074	11.497130210685556	0.0006970372660458145	0.0026236992538361276	0.23340000304433878	5.652864652618029	2.42078726062039	0.11973474327286772	0.20720208828446318
RLOC_00001143	-0.8875994469653784	1.7552410984011555	4.169832506423143	0.04114986744389227	0.08896031886861225	-0.5200233240384015	3.4594668847198426	2.7170858541079035	0.0992791199230853	0.17968134460825247
RLOC_00001145	-0.6323882529933408	3.6095614599346524	7.031808423287575	0.008007445025216511	0.022781072594775863	-0.4090881487873061	5.109274184014708	5.00223451495625	0.025314616171525476	0.059277030378762266
RLOC_00001150	-0.5897078032351071	3.2069470506261717	4.643312017770413	0.03117478208968092	0.07103817286248541	-0.16966454945936765	4.854526085680262	0.7454651299835802	0.38791580657717	0.5059289507147463
RLOC_00001152	0.23026114364857478	3.6177962544038045	0.8884095446719091	0.3459086703835381	0.46705456227477593	-0.6068454852698679	5.349876341680785	12.756394325659578	0.00035479416981236157	0.0013873310945474802
RLOC_00001157	1.3008952466152444	6.5274740181033675	110.33909560264547	8.25837510786521e-26	1.7443948064862972e-24	0.8896701542619113	7.81716737442661	87.5720771057683	8.126381743410364e-21	1.0169115843154399e-19
RLOC_00001162	1.39702802953429	6.0175494346882825	108.28897760598112	2.323129048495333e-25	4.7820017159027466e-24	1.1823393945380896	7.214233002954154	130.02141482235095	4.053805055736003e-30	7.64894855122149e-29
RLOC_00001164	-0.15233275196621424	3.4635845024794203	0.3633556054234828	0.5466484986768682	0.6539847224056708	-0.36718724791063784	4.939942713855125	3.6442098948031107	0.056264494201552544	0.11353467703672884
RLOC_00001165	0.2089552138242022	4.318789047261367	1.2053948579392078	0.27224608005238493	0.38879599352332156	0.697808708097058	5.812915234844393	23.431653725572435	1.294311870840206e-06	6.74056564084887e-06
RLOC_00001167	0.3430813060718704	4.333550153827546	3.163113945636332	0.07531938714218163	0.14556386712419417	0.07454588010388925	5.671395004023972	0.24986923021857077	0.6171671715188146	0.7097084483872985
RLOC_00001168	0.489661363418633	3.265417044400281	3.064587333382814	0.08001547662521007	0.15264446185925046	0.15500183461043415	4.779904338122472	0.5950145859507483	0.44048653444380714	0.5559163511390228
RLOC_00001173	0.14942600092946956	4.152677336831269	0.5317213288771037	0.4658840748261745	0.5815367084683624	0.25126552428018845	5.745111567715918	2.9617361009424883	0.08525635434019584	0.15945631825835874
RLOC_00001174	0.9404265334032513	5.432304389138747	41.38747967311437	1.2485450531189372e-10	1.0042201235778885e-09	0.7785022476421063	6.8508330139773825	51.32114623591342	7.842627533402991e-13	6.402779663545723e-12
RLOC_00001175	1.3264191609272993	5.425494074462154	79.29134309260215	5.359402928553413e-19	7.592849115243418e-18	0.9143839082171995	6.803228201982564	68.6787212713007	1.1588460180948437e-16	1.1869974969734403e-15
RLOC_00001176	1.6464193015249988	7.230730726019426	188.38716969349662	7.151296136158009e-43	3.930591981015015e-41	1.3980184829724005	8.757558980505864	239.75922833412213	4.4381768362368544e-54	2.0527056653590635e-52
RLOC_00001177	0.7079721519820861	5.356760886738856	23.40159139023747	1.3146973128232742e-06	7.448295947122899e-06	0.6813565480721243	6.9346108213293585	40.97734264641146	1.5400427897987051e-10	1.0866202453021913e-09
RLOC_00001182	0.024894368895106697	3.1198126289694676	0.0075362389709559	0.9308213352932803	0.952873020291771	-0.4055588686868772	4.875609006103734	4.263927872991509	0.03892980810190971	0.08444711885577481
RLOC_00001191	-0.1999843557123697	3.352791239567339	0.5968857144671569	0.4397687401715129	0.5578410142968272	0.09599025168925572	4.559257882023505	0.19521475520528808	0.6586114037328439	0.7437626253405537
RLOC_00001201	0.036137610530079925	4.442392811970153	0.040163308739000037	0.8411616159366786	0.8892658722865793	-0.020463898607393123	5.894621547662343	0.02138833886884406	0.883725988512836	0.9195479834882324
RLOC_00001204	0.7766038100276949	4.291529800320909	13.849068256484191	0.00019809493451639827	0.0008285261444434857	0.7669630507304884	5.754070672254849	27.229021604437733	1.807254243270681e-07	1.0201270053816601e-06
RLOC_00001205	-0.2764552813721952	3.124475019919738	0.9490510649578585	0.3299609582208753	0.4499779344508637	-0.04255287649941335	4.465649366707584	0.03598638303615376	0.8495436155401652	0.8950685819925935
RLOC_00001208	-0.8636537738006067	4.061078460049565	17.004271888322446	3.7295812190691574e-05	0.00017488082244923595	-0.6292416828740481	5.58082927649813	16.338938350049247	5.2964402293262515e-05	0.00023443223426516154
RLOC_00001212	-1.2194645930166483	4.78805915593311	52.43073692870831	4.45693335135967e-13	4.300449110530681e-12	-0.594401684639754	6.201702950131698	21.147887344070234	4.251697017151702e-06	2.0947239316318964e-05
RLOC_00001215	-0.3689433848712104	4.510395208903216	4.279288712109256	0.03857948959313136	0.08432385628746471	-0.49426532173669396	6.214273093921294	14.8483581586678	0.00011650944512355784	0.0004940358095122107
RLOC_00001219	-0.47342037679354815	4.416964617060453	6.704877699326179	0.009614952527421946	0.026604578711880756	-0.10918113345024957	5.864024218577931	0.5970516397113685	0.4397051753752106	0.5553283374160219
RLOC_00001223	0.7966427004585734	6.141007938717436	39.001196744146604	4.2354582379005486e-10	3.271805782301689e-09	0.49114976549898787	7.39652790967009	24.74956059472823	6.528368236197258e-07	3.4916626648922574e-06
RLOC_00001227	0.7817412541045209	4.912651106798106	22.807060628479526	1.7910648784725709e-06	9.990754035178027e-06	0.9842347619541248	6.355182487760576	63.21097585458464	1.8571067967019647e-15	1.775752664715294e-14
RLOC_00001228	1.522327250602971	6.059867170526447	119.31748401772643	8.923989064694137e-28	2.1005389506986335e-26	1.2557802158825733	7.417810241957765	154.59555593861725	1.716239667687545e-35	3.96017588374759e-34
RLOC_00001231	-0.12539930551187228	4.087205822178236	0.36053722009855704	0.5482080285163757	0.6553277025011287	-0.08238110794482652	5.605942864514392	0.2924757342778195	0.5886383721920267	0.6858010258690973
RLOC_00001235	-0.5788482775475084	3.1636390742659515	4.278859566142482	0.03858923165882334	0.08432759241347365	-0.02701907586767186	4.837466637646564	0.018797582405285063	0.8909483728958307	0.9241322828525319
RLOC_00001236	0.3983874169794713	4.453858317936474	4.457099059712471	0.03475647556944602	0.07735286846047154	0.1647502476479855	5.673190442978999	1.2231924393046305	0.2687350432286876	0.38586559338867493
RLOC_00001242	-0.8074676161607565	2.434547465151742	5.169141052537334	0.022991581494504074	0.055219771798056226	-0.525196361774311	3.939085013489244	3.7877915518266114	0.05162772426337235	0.10634480616855922
RLOC_00001245	-0.0050987106052438076	2.953666225661713	0.0002841706509544295	0.986550408186482	0.9897559427696567	-0.42913031675474855	4.8641238214725275	4.735604123546335	0.029544470428220185	0.06744464647407412
RLOC_00001250	-0.4859603237486427	3.940657358151821	5.023063893927165	0.02501187410811779	0.05937916200520592	-0.5651137850004633	5.362804423191881	11.210141585023397	0.0008135151261114714	0.002967719009396921
RLOC_00001253	-0.26103441255088927	3.3956169866263055	1.0112800049352946	0.31459638463834494	0.4340977580045658	0.07435510460707125	5.223164708109399	0.18125350585974387	0.6702982032351946	0.7537982900349517
RLOC_00001257	-0.735270470533011	3.6767753419255897	9.820476981121729	0.0017257957982757543	0.005924592639077459	-0.4538706257505504	4.853744066269461	5.254252992820451	0.02189319720094223	0.052978186063595
RLOC_00001263	0.1991711881674317	4.70924759190395	1.3982386524072807	0.23701870033512498	0.35070081974885725	0.28956809339550077	5.918184539415827	4.3435362226882965	0.03714968854410766	0.08130802168534217
RLOC_00001265	1.2320109783056608	5.374825936673761	67.40367183211308	2.2123653731584693e-16	2.681918208708731e-15	0.715062072029283	6.497752721846162	37.023544997183734	1.167113741116624e-09	7.799826332261893e-09
RLOC_00001268	-0.2191087644712762	3.6221278684621505	0.8046080741701678	0.3697191924036196	0.49062218200647184	-0.18752337309084002	5.175868033844467	1.1116508785851655	0.291723365551155	0.4110332437576839
RLOC_00001272	-0.945190984445177	2.7272887537486983	8.294378573887418	0.003976798629733408	0.012391935890454531	-0.3642940701120429	3.659966440114889	1.5369992944940618	0.21506500736109074	0.32493416495669764
RLOC_00001273	1.182219202084137	6.474840586678218	91.1864498830841	1.3075256301411286e-21	2.177009678252157e-20	0.7921538430012206	7.680174309580262	67.88287077603843	1.7350190457903605e-16	1.7616987390476783e-15
RLOC_00001276	-0.5100003895743305	1.579395011499922	1.2359786530177528	0.26624747528506215	0.38215285692406104	-0.8050785397028505	3.8881798727294	8.400171580573389	0.003751855956075809	0.011640288322352222
RLOC_00001279	0.11260638814910053	3.873409931593168	0.25231823524315233	0.6154474464245208	0.7139994774966922	0.01217055877178408	5.17829408755543	0.004711733523566741	0.9452745322544137	0.9618967463566584
RLOC_00001281	-0.123063726064134	3.6004673191769885	0.255727764256219	0.6130705489226135	0.712815884659386	-0.2897855634975426	5.221641735421749	2.722050416729119	0.09897080495565246	0.17927786080562372
RLOC_00001285	0.6377707017710914	4.336526799736217	10.23426895678279	0.0013785523831514905	0.00483368166944701	-0.007465876497123851	5.7767550122102485	0.0026665413240472002	0.9588166904402985	0.9724441630057952
RLOC_00001287	1.0418848873742108	4.905549915094834	38.84786112642114	4.5815564866382533e-10	3.5339588535435993e-09	0.6817876837949255	6.438496792510889	32.6107602481371	1.125896918272536e-08	6.945236042857436e-08
RLOC_00001292	0.1830263644164543	3.945778333976471	0.6957701031748145	0.4042086615195717	0.5238097183844542	-0.40654767606852105	5.430967848203201	6.193066085166494	0.012825179377520635	0.03377780798734943
RLOC_00001294	-0.3741945133928015	3.6846254398564544	2.3909893549226338	0.12203637325530577	0.21088688830192592	-0.49867397192321533	5.4331794035594045	9.280968306331868	0.002315469940326218	0.007592167052930969
RLOC_00001295	-0.8481256911502001	2.450892570508275	5.799349570134204	0.016032104147259064	0.04100000714687592	-0.7193200278698	3.9201999265965592	6.901538978775302	0.008612158257480166	0.02409247256735525
RLOC_00001296	0.8925436036639584	5.521649563859617	39.41256219627595	3.4308271104184907e-10	2.678514814679114e-09	0.6887391467236378	6.862605705918698	40.57545630369819	1.8916791597162638e-10	1.329366766925104e-09
RLOC_00001299	-0.72137114567768	3.123932166309714	6.288453273442196	0.012152705899997566	0.03246287698172378	-0.3227180699513351	5.258342422861713	3.4500985614521458	0.0632479981041301	0.12491360648895068
RLOC_00001303	-0.28482648922719145	3.2435682828308487	1.1170124185942267	0.290562668131488	0.40949481675988203	-0.15999854417772177	4.753498500850957	0.618207084647211	0.43171432577469515	0.5474839910930193
RLOC_00001304	0.44882388823277586	4.868352022388939	7.29526994631601	0.006913638134564898	0.020021896037699945	0.3766518686510084	6.271979798915146	9.103950485570056	0.002550580221482445	0.008285439896455504
RLOC_00001308	-0.16838314186970307	3.1908628134526644	0.3738459342302778	0.5409153315742685	0.648455995302806	-0.2844758735096009	4.770369060050396	1.9666859586578416	0.16080006856599643	0.25825912802117124
RLOC_00001315	1.2601756534406074	5.017166972428439	57.7765400576034	2.9365114063652746e-14	3.092025751657237e-13	1.0536421739454869	6.839407554189807	91.59454486770086	1.0638588346977242e-21	1.3944386898241454e-20
RLOC_00001318	-0.8690743274361648	3.395283722560282	11.504344947634225	0.0006943369501832718	0.002616349354997842	-0.1291004983014132	5.383899349277551	0.608894605564827	0.435204314479272	0.5509054856182634
RLOC_00001322	-0.2998395853177516	4.28189265741446	2.3779943053494907	0.1230554480799156	0.2123682547991047	-0.30838888146891863	6.001246801406404	5.109755287993049	0.023791675758880595	0.05643669312979833
RLOC_00001325	-0.5639996850973396	2.441431123698661	2.5517869514465557	0.11016958660825518	0.19460883732348358	-0.0887932283020777	4.254263856428379	0.13589781867863904	0.7123936811254089	0.7882201768506343
RLOC_00001326	-0.05042398850902946	2.8838842551301798	0.027219804503049533	0.8689563746628483	0.9098260507282253	-0.5871850127859732	4.205876553519219	5.596036075518359	0.018001161580129734	0.045052251592319924
RLOC_00001328	-0.40419421906921144	4.389219354912306	4.744451259280069	0.029392926363312175	0.0675940724999017	-0.6989786346030449	6.291647110984664	30.67882718747138	3.0446931487242245e-08	1.8152318778225798e-07
RLOC_00001329	0.4054526544064957	4.025175253701436	3.494219930424319	0.06158341494058941	0.12389856076012029	0.3485048879586927	5.799462995077023	5.873663454648101	0.015369036252327346	0.03951984119842881
RLOC_00001331	-0.4644910033091819	4.334059059960127	6.170695356722757	0.012988354787659768	0.03430232668197541	-0.13800300702656676	5.945566780715527	0.9984441807165816	0.3176872636641437	0.43611383122513653
RLOC_00001341	0.6419098431842536	5.422762470618735	19.18736506620703	1.1849510783877898e-05	5.946279359902015e-05	0.26182377311903765	7.03692330976829	6.378089704184561	0.011553772293159062	0.030881633224510437
RLOC_00001342	-0.3678280798363784	5.117734059968753	5.840811028376363	0.01565860732687347	0.04022120374786339	-0.2961390764694795	6.731113942497573	7.156577223047421	0.00746895874280319	0.021251110525932437
RLOC_00001345	-0.029960624543499507	4.0508726397366805	0.018587233749770782	0.8915564517692632	0.9256746033178115	-0.06198427809668531	5.505849504017796	0.15473363276359287	0.6940521601991305	0.7733109341338966
RLOC_00001349	-0.5198304334287611	2.7902692127510935	2.62259157023173	0.10535225078422361	0.18771010331513568	-0.1627187594075425	4.437947981655632	0.5145861638285806	0.47316025195916694	0.5860912559366793
RLOC_00001352	-0.39927406291836803	3.7409710512412757	2.8778845140429707	0.08980393143634528	0.1667244015354593	-0.36202581106038634	4.99379283760621	3.6592246240740463	0.05575957663566035	0.11290642142676913
RLOC_00001354	0.704764465476931	5.806170741265547	28.156033785178245	1.1191821785546604e-07	7.073554792574848e-07	0.5813529024101198	7.371552446440844	34.32513565220166	4.66320031540416e-09	2.9726132429525365e-08
RLOC_00001357	-0.4919903200676127	3.6306988446061523	4.291332717869228	0.03830712695428422	0.08381580216049932	-0.3503083879952934	5.227727228060718	3.983856124314869	0.04593828228605824	0.09646390307349205
RLOC_00001358	-0.21942189225943134	3.304119352183685	0.6828535359136094	0.4086058477914205	0.5280738877402846	-0.5139096752662585	5.0372441530097305	7.50023927499235	0.00616907964307886	0.01795762139083343
RLOC_00001362	-0.3617880597754515	2.9466349673077605	1.4257511817843165	0.23245910137949516	0.34556154719370435	-0.4549275419968211	3.8985188963053736	2.7849512886744296	0.0951535866895058	0.17401454566332022
RLOC_00001364	1.3601237734128768	5.167267615259565	72.58398972676407	1.6007241755336365e-17	2.1058148364351023e-16	0.8569734463982271	6.4278963274051275	50.49201594717028	1.1965057036055469e-12	9.640915872720366e-12
RLOC_00001365	1.374270563041487	5.886094913555955	105.28183964103388	1.0594266984461454e-24	2.0905754662194803e-23	0.8834529993018082	7.19273676406603	74.03296746831032	7.682324689430421e-18	8.384275147019749e-17
RLOC_00001370	-0.3456498656673739	3.0103154788890247	1.328842333445273	0.24901127230364445	0.364204394607987	-0.17038168626040126	4.770655107124591	0.7090692428796377	0.3997529739537021	0.5173186827979684
RLOC_00001371	-0.12554043053602335	4.2521645185038155	0.42166037020506764	0.516109712450035	0.6268844693192744	-0.35375027565371797	5.812700336835792	6.0332621850465324	0.014038764595039433	0.036564869631188046
RLOC_00001376	0.8747141570444372	4.566969648846268	23.494116150803432	1.2529636597567103e-06	7.117755681886334e-06	0.7747594199436332	6.022903022295125	32.28611565870798	1.3306073547952266e-08	8.143690341648799e-08
RLOC_00001384	0.2603899870520983	4.102743435050748	1.542951966406051	0.21417894518032612	0.32557928851767504	0.3194682057535993	5.801980739729469	4.945617164412175	0.026156898663465593	0.06088678151777756
RLOC_00001385	-0.43690477861165716	3.10915893451952	2.296977652970316	0.12962601174688765	0.22134252949232702	-0.3220804449613496	5.10321663916388	3.105597002658252	0.07802362058267238	0.14872367329293343
RLOC_00001393	0.6741355056988274	4.775045237802582	15.70222164150642	7.41370405976389e-05	0.00033431729046134583	0.4313338798451744	6.20417827476589	11.417185923806038	0.0007276782990664683	0.0026853759092790334
RLOC_00001402	0.7063648184509098	5.575915484678753	24.19263983256665	8.716475605492965e-07	5.0112574428513225e-06	0.5092898092901166	6.9973102177350475	23.684337499745098	1.1350252170669203e-06	5.9434562364017935e-06
RLOC_00001403	-0.0494662208676973	5.241765504225584	0.1053056944109656	0.7455531722479891	0.818115356819941	-0.048603712746832776	6.772185251442835	0.1975428641135042	0.6567115283661685	0.7422558226199164
RLOC_00001404	0.5590325658375415	4.6692185676364515	10.13154721621291	0.0014575301079083963	0.005076692459463286	0.4256431869875698	6.198886575124525	11.09002462752471	0.0008679333177096296	0.003146557977428661
RLOC_00001406	-1.0006918745105997	2.8470015595329983	9.854302589215926	0.001694350184379652	0.0058280760929284355	-0.3044073932394035	4.632666852657308	2.0394894974855218	0.15326107368231207	0.2489306950171093
RLOC_00001408	-0.5774999207146522	3.939379577118222	6.501411949969409	0.010778886002010053	0.029307626327143628	-0.1390151228542467	5.340719118911036	0.6823516992453857	0.4087780993733469	0.5258222574516993
RLOC_00001410	-0.6293533599283596	2.0869895889233105	2.6074038414574545	0.10636576537445085	0.18913072576236195	-0.1040584699624898	3.8496113924900186	0.1436307146351723	0.704697940307994	0.7825091142563331
RLOC_00001411	0.003676975799404381	4.381554138241643	0.0003859222933120243	0.9843266417076182	0.9882805168942785	0.09823574204619437	6.060560405775517	0.5418020219586666	0.46168686818732174	0.5747565913794689
RLOC_00001412	-0.3286101418575815	1.9894809433789185	0.6632467810987088	0.4154160421851334	0.5347029929940572	0.14078160589059707	3.730541906673282	0.2443590819467225	0.621075331908819	0.7133431692058517
RLOC_00001413	-0.42358405640203156	3.2585572718924416	2.3795541885439033	0.1229326246298262	0.2121911695764412	0.07662153045548735	4.962118543361336	0.16311998277835738	0.6863001189369384	0.7665688461583865
RLOC_00001415	-0.7220549460734813	3.5850324568001133	9.04191606347812	0.0026385894879439203	0.008623883077345976	-0.3795386531613054	5.431979037621025	5.408555344461652	0.02003829259122115	0.049223685988589345
RLOC_00001419	-0.10263487273372157	3.6008325981787515	0.18215685534121961	0.6695261881052345	0.759283344790834	-0.5846490803221285	4.878870256190022	8.769503927415634	0.003063087462759583	0.009739356532862769
RLOC_00001420	-0.16035108405913845	4.245003273885391	0.6797514000909661	0.4096723417389576	0.5291916135813433	-0.1962906755362679	5.59180061273346	1.6414748341951615	0.20012323507112337	0.3069530818132541
RLOC_00001426	-0.2652230570114172	3.688919332937691	1.2089451886313922	0.27154112523857515	0.38789477925630184	-0.41683330110315286	5.187019526251881	5.470885315979059	0.019335828277944903	0.04780006147637003
RLOC_00001429	0.8223094074375114	4.940939418415176	25.098208460633906	5.448345299079963e-07	3.2025044204782447e-06	0.9928956626033768	6.2334496482188495	59.55589197479288	1.1886972325727846e-14	1.074946791109532e-13
RLOC_00001431	0.059982318310976016	4.348051497044746	0.09982040544100457	0.7520452610469824	0.8236878959136896	-0.012621597986079452	5.911535195193979	0.008218578291929735	0.9277656356953735	0.9500405171229401
RLOC_00001434	-0.19969551208833664	3.487945678931836	0.6281806053040344	0.428023466166467	0.546907296472197	-0.21886566254066794	5.247106860530118	1.5826444192790055	0.20838019709715846	0.316840505332812
RLOC_00001437	-0.3765090975553768	3.1881699806219155	1.6145369475224562	0.20385521797365608	0.31397771101635	-0.44074582886435026	4.7520977942973115	4.622106299564052	0.03156245791375426	0.0711561618287537
RLOC_00001438	0.1250435827746449	3.0042238550264364	0.17755011590689007	0.6734871408826526	0.7624574576713132	-0.1896700513228899	4.707396773322233	0.8403377233256091	0.35930019965212917	0.47883889263108714
RLOC_00001441	-0.3404425962631639	3.2116473472663296	1.4090277406002727	0.23521786088324872	0.3486258793664189	-0.35767334887606095	4.797234216055616	3.156288938120415	0.07563493855771038	0.14488071883185574
RLOC_00001442	0.3927933355798088	4.621128928398525	4.9337072371171855	0.02633775657565686	0.06191083039212846	0.10094462670738434	6.355297895858848	0.6891753072886537	0.40644503097951884	0.5236937332179454
RLOC_00001446	1.4811538712301897	4.783116367338657	68.36367993249186	1.359587796338635e-16	1.6693511913407004e-15	0.5809261086991093	6.057938273436536	18.73439321138964	1.5024796937438134e-05	7.083311317744183e-05
RLOC_00001448	0.5374610794101942	4.8860668731766035	10.658868970702079	0.0010954435861065936	0.0039289261246829585	0.6639486347112643	6.491613166753861	31.94344461166883	1.5872712579829386e-08	9.64395887590444e-08
RLOC_00001449	0.5198694520213656	4.760866529486652	9.373045459020945	0.0022019937131356154	0.007345576739910293	0.800623622011522	6.320805990283444	41.52331787865134	1.164733549761475e-10	8.301790589915631e-10
RLOC_00001450	-0.34829190008201216	4.210254902773218	3.1440758940815696	0.07620315529812473	0.1468932655746811	0.3108489160781916	6.072552105605072	5.4675438905745235	0.019372832780156626	0.04786899773096362
RLOC_00001451	0.8265977814014254	4.180658650563541	15.738682870356453	7.272169379605354e-05	0.00032835799633160005	0.3053177836577816	5.5357585887413405	3.846319315260982	0.04985528438868987	0.10328149778943468
RLOC_00001458	-0.852167050786224	2.5490458832116003	6.203135210153037	0.012752422731056966	0.033789735949176176	0.33609101148424947	3.7089666538709376	1.3704770950315242	0.24172992910097768	0.355550561574301
RLOC_00001461	-0.2898414125845516	3.4066600590954548	1.273354574373501	0.25913830613446964	0.3748056109261866	0.1251997933042304	4.368646831595829	0.2921017621660784	0.5888768091464004	0.6858905723572285
RLOC_00001463	-0.0747007824312291	3.505287129612095	0.09124170154119104	0.7626044846899656	0.8317247687078335	-0.022631301602264772	4.453495211496421	0.010082887510405314	0.9200159871496003	0.9449712753095089
RLOC_00001464	-0.33713434513762447	4.371110905562928	3.168038088624913	0.07509259998263326	0.1452592803791568	-0.4649694048890577	5.824349080173779	10.418405014666181	0.0012476560225265357	0.004359115001832312
RLOC_00001468	1.2858694730742215	5.351668183774746	71.09983920930574	3.3959775175917614e-17	4.3529880317067535e-16	0.8617879743662515	6.735871154297525	59.55321401081913	1.1903158733478619e-14	1.0754841957211016e-13
RLOC_00001471	0.3286105105857058	4.6127161694519465	3.5691586599250487	0.05886212720746793	0.11920475561084357	0.3181092398534569	6.4154479488223135	7.1025578209347415	0.007697402877771187	0.021812424511125424
RLOC_00001472	0.032418163589024954	2.850375177100631	0.010938416404660312	0.916703622295451	0.94293108238856	-0.3162522794845587	3.1224900946041045	0.8129558005801778	0.3672478078645247	0.4860875835160376
RLOC_00001475	-0.42665157860134617	2.899487072998853	1.8585426271342644	0.17279309624715694	0.2764949840191123	-0.3408382169809612	4.504347917216391	2.3424467873470336	0.12589167722070743	0.2151149244884723
RLOC_00001476	-0.504956810106631	3.3517214960305437	3.7562079050887744	0.05261176943767079	0.10865991649747549	-0.3630617344574052	4.6073779270752695	2.840745199522932	0.09190158382664507	0.16906864002031655
RLOC_00001481	-0.6049890255166132	3.683984529656453	6.353405362664952	0.011715619876923747	0.03147148860489905	-0.32155080418915516	5.249103510748766	3.4067502689425253	0.06493019759929052	0.1277313368174913
RLOC_00001484	0.8272719114894698	4.255681576744992	16.448837753006785	4.998081485060943e-05	0.00022972793095520918	0.936549291538487	5.96009547868895	45.01575218957409	1.9545584822107145e-11	1.4689269509470503e-10
RLOC_00001485	0.23790453870953898	3.888541569449968	1.0372744195757955	0.308456218117939	0.42838647675646563	0.19074966522325978	5.660828607320195	1.6282620557027352	0.20194359926560998	0.30918430031400806
RLOC_00001497	0.11365677305039794	5.364160864477283	0.6361887055144149	0.42509430126358105	0.5440253534883669	0.02171129968089186	6.930067286443641	0.042192781875284524	0.8372527326083664	0.8858527098312243
RLOC_00001501	-0.869905567221376	4.299583616449555	20.188690819981574	7.016653564529707e-06	3.6321907850312064e-05	-0.8971587209311781	6.120867843888762	44.491520665927204	2.5546123816344785e-11	1.9062455859829701e-10
RLOC_00001510	-0.027228747862009683	4.19100290074476	0.018198783678687214	0.8926886722856351	0.9264303608798401	-0.11058812036170611	5.620213196003692	0.5314452548470463	0.465999877375401	0.5790664827274631
RLOC_00001511	-0.27922850014464545	3.6453157540964116	1.33918656997011	0.24717746917570296	0.36231067738153167	-0.4123382016417046	5.92670610773671	8.713599452946749	0.003158449707905984	0.01000620503418978
RLOC_00001515	-0.44746088639254594	3.398358686315585	3.0313107449805967	0.08167201385135066	0.15512806249529204	-0.40041285409833755	4.796665168585985	3.9443795044356387	0.0470281943400118	0.09829763336169299
RLOC_00001520	0.1110919068009031	3.835158415706812	0.23416938393949271	0.6284493794912376	0.7250754572919016	0.2195544783755293	5.545993267837897	2.0049871829379473	0.15678261924703427	0.25320115666429976
RLOC_00001530	0.4074424176416616	2.8487447714404226	1.64521246834116	0.1996117943198556	0.3091200201755191	-0.2841254493787934	4.60771587658879	1.7472201034966002	0.18622658606387174	0.29011121583533717
RLOC_00001531	0.1255619621881075	3.857450414068289	0.3137385080641848	0.5753950970876173	0.6786313593108422	-0.17703242738374875	5.501299041641155	1.2520767554039907	0.26315619865123	0.379776897544916
RLOC_00001538	-0.00885588935431096	3.211665808273139	0.0010430119804505367	0.9742362415064838	0.9819059200590503	-0.2777140715326185	4.9009191067321645	2.045050838290555	0.15270188287367695	0.24813760536925156
RLOC_00001540	-0.09009187155967249	3.7365287348483807	0.14980317459454806	0.6987235226836744	0.7828387984133632	0.024042747703083664	5.231378246271311	0.019040341484270584	0.8902508941823855	0.9237738819945508
RLOC_00001544	-0.3332499348599568	3.2629001058961546	1.5119516519511942	0.21884152297498635	0.3304658095787409	-0.20117155026975095	4.605906914380001	0.8789295919071733	0.34849502320596387	0.46782371162759423
RLOC_00001545	0.47921837304249226	4.960819495536647	8.900763933071591	0.0028505137595815984	0.00922848303198041	0.045408641519515854	6.274527937701497	0.1327909946511796	0.7155556119276385	0.7904085142297675
RLOC_00001547	-0.9663211875085063	2.926268399036089	10.222130979338417	0.001387654286087833	0.004861514392955204	-0.34438510895041335	4.752105555774584	2.838570619089163	0.09202604351063623	0.16923829581681024
RLOC_00001548	-0.24757092887812282	4.127359409442965	1.4734468945889545	0.22480263787377025	0.3371878971851464	0.0622392540616514	5.671012894619722	0.17415196306234804	0.6764478834747105	0.7588445697832019
RLOC_00001550	1.9191611313033028	6.895321616134277	231.56083403642901	2.7224230064484966e-52	2.8297026457125067e-50	1.8879428641662317	8.278773748773494	389.5902057104446	1.0164595300397856e-86	1.5030716346320716e-84
RLOC_00001551	0.27823151934383455	4.202418164515431	1.680972465514703	0.19479528483317904	0.3034214528830591	0.49360332229689086	5.698967580807523	11.0728690765716	0.0008760003258749697	0.0031714232487452783
RLOC_00001552	0.45565704606580826	3.5105141264367097	3.236116071750427	0.0720312086429005	0.14042763989984092	0.40960429655114966	4.892738171382687	4.458478982967431	0.0347284077501829	0.07689024735748001
RLOC_00001554	-0.3235632954613753	3.7476679949323257	1.918432880655823	0.16602952158792048	0.2682415552919312	0.19817833600342563	5.4798195229383095	1.5523791228750703	0.21278456132275708	0.32237014564612215
RLOC_00001555	-0.10804334248598085	3.7148734791153544	0.19350153912586165	0.6600181562520171	0.7515044039407457	0.25976955824736797	5.133826612721028	2.0843592046704904	0.14881465736612487	0.24321374341328533
RLOC_00001559	-0.47105449291381857	3.004505019474618	2.3427680506405792	0.12586572164420665	0.2159822652342087	-0.35961920874338554	4.706653489452487	2.9952554310830286	0.08350874249305983	0.15695463179512023
RLOC_00001567	-0.5337991979575276	2.9550826861269934	2.8516830391970327	0.09127833508048826	0.1690613905566277	-0.5228707515947539	4.786076732465593	6.620242903644375	0.010082608165084146	0.02746686640509041
RLOC_00001570	-0.20438285362403555	2.874623702335277	0.4458304059254795	0.5043217079045501	0.6157675377508685	-0.17839585116146567	4.537122417633094	0.6609660128860311	0.4162191114479384	0.5324977878214716
RLOC_00001572	-0.7862537604936523	2.008745464101396	3.7529604180240392	0.05271407024604454	0.10876421176159111	0.29974808807481385	3.540191948841887	0.9765925168654181	0.32304150923189623	0.4412621746126625
RLOC_00001579	-0.27788846769210224	2.7630681568066966	0.770746120026168	0.3799863330613884	0.5005139930336833	-0.5095869759986869	4.536903871510085	5.291873328749995	0.021425160775842007	0.052021915584080765
RLOC_00001583	-0.48239874350985196	4.037718277518841	5.215296739697772	0.02238902578678834	0.05400735126601654	-0.6316607796588092	5.648356125550884	17.12108588388435	3.507077490309814e-05	0.0001578936816928076
RLOC_00001585	-0.1142401737100905	3.460666505569046	0.20546305402185983	0.6503468977099711	0.7433952234493987	-0.0790797503734195	5.173277437840222	0.1979354615468587	0.6563924680994643	0.7420549717428961
RLOC_00001586	0.9902906365612669	3.983342307753698	19.326475345427124	1.1016815466958793e-05	5.5496414957837526e-05	0.48796579278314267	5.2314523134055415	7.792339815433126	0.00524682033431634	0.01562733806808149
RLOC_00001587	-0.3200446161841196	3.449905578228359	1.6134605702579194	0.20400603404513665	0.3140486687010356	-0.1522833363193612	5.030247986002822	0.6683377334170539	0.41363174974090516	0.5301818752935861
RLOC_00001588	0.5042250482763803	3.9195356241397152	4.5382121395350055	0.03314619420013086	0.07454343331469018	0.4752356758305836	5.594991994845879	9.649668207563472	0.0018938578881862054	0.006358686910158929
RLOC_00001589	0.012027338940147311	3.302614647262132	0.0020567347250666224	0.9638273479576859	0.9753861531131623	-0.07356606393698124	5.161200089829844	0.16992414496444241	0.6801792312394703	0.7620787017480544
RLOC_00001591	-0.5144992029893276	4.192187823707243	6.545120331530102	0.01051722144542184	0.028707693898605946	-0.08015734560754623	5.543153389632135	0.2661634787441107	0.6059170320801719	0.7012260714075975
RLOC_00001593	0.01606384149241147	3.626069903252985	0.004352141393810793	0.9474011035449476	0.9647702769439189	0.14657816877992944	5.268314121581679	0.725037700079735	0.39449640734159297	0.5120308790554313
RLOC_00001597	-0.021905292536412727	3.3945691670511766	0.0072055062102140965	0.9323526157137468	0.9536948929751896	-0.5908307327468473	4.933613772151932	9.259960509707632	0.002342180719269744	0.007665385090901822
RLOC_00001600	1.0168773850480797	4.938199407008989	36.66009109330861	1.406291569917768e-09	1.0433391449467653e-08	0.3047569801141876	6.357599797018661	6.29005265249608	0.012141744449525437	0.0321747034264431
RLOC_00001603	-0.038669678101428316	3.640768240274204	0.026761897771641285	0.8700534129689397	0.9104685734995942	0.1787867826950999	5.282055862730072	1.0893450662976294	0.29661636655188317	0.415914738240631
RLOC_00001604	0.5883719995466747	3.517936076644176	5.436915434363684	0.019715456718769456	0.048745375561385244	0.004863495705610046	5.147262502753624	0.0007363531029929149	0.9783513995188999	0.9854851140313663
RLOC_00001607	-0.3169316565884004	3.3815158840228756	1.4716443800412962	0.2250864267023234	0.3373725453342363	-0.35721773095398524	5.069464265423205	3.731003837036401	0.05341128512169469	0.10922765920184128
RLOC_00001608	-0.6498026767099264	2.064593779114754	2.7254117805834017	0.09876264705803109	0.1789763971716227	-0.03369491713039515	4.308636051755311	0.020308227834911763	0.8866795983053252	0.9219429481190815
RLOC_00001611	0.22422320498952916	4.983561328456298	1.9710863506300456	0.1603325991795091	0.2610377832175072	-0.009963168480411382	6.333899591513379	0.00663927351076854	0.9350588481167069	0.9549788761067417
RLOC_00001616	0.36834715637115456	4.102765177824208	3.0777238017610262	0.07937153520375104	0.15177456768105252	0.3783825390699992	5.72466260695333	6.61616263930574	0.010105734348312877	0.027499988652124246
RLOC_00001622	0.8600342136086094	4.147367990892213	16.51634986846532	4.823236740297779e-05	0.00022227541395806005	0.6629505846916081	5.848977645947677	21.60530300032493	3.349245288774567e-06	1.6736661726246637e-05
RLOC_00001623	1.1310905035297423	5.160743886808024	49.365537743813334	2.12445116284883e-12	1.944419207287447e-11	1.3499401165405625	6.850647561136123	146.26470372208107	1.136248475309037e-33	2.485306821306162e-32
RLOC_00001624	-0.5860008559228375	4.265657630826565	9.159734510872829	0.0024739845949718117	0.008152589028443536	-0.1232999297178904	5.627088224322694	0.663831954901319	0.41521036985549414	0.5318157463843886
RLOC_00001630	1.3727109986890453	6.118187218546144	106.2763884873224	6.413610911513203e-25	1.2776107656369186e-23	1.2189954603863182	7.333242158198797	142.70970974001037	6.803022791875365e-33	1.445848912791487e-31
RLOC_00001631	-0.15035532687214104	3.500569432216826	0.3620233486219	0.547384661278077	0.6547162098777773	0.024538062559466074	5.109853737727935	0.018310742334814556	0.8923610931832869	0.9250477643633107
RLOC_00001633	0.6655649029655778	6.1227557699243285	29.2267323325811	6.438475220004863e-08	4.1466940404669354e-07	0.5827721081778732	7.400117340104389	34.79751241298971	3.658406072242855e-09	2.3636680216909377e-08
RLOC_00001636	0.3357613324753667	4.744348384361362	4.010625297583903	0.04521437898962892	0.0960073929274119	0.6278711763813398	5.675156346876178	17.545074578900458	2.8057663227028424e-05	0.0001281886014884993
RLOC_00001638	-0.05531354833691727	3.5916035367809194	0.05304954405259554	0.8178393394355318	0.8721911745431749	-0.16775910349672177	5.2548152724892905	0.9364400289332917	0.33319505988047854	0.4523748782730046
RLOC_00001644	0.7037343587288308	4.7425585523865035	17.21789222292879	3.332826295434069e-05	0.0001573909601865356	0.655485972499364	6.2248135374439	26.445260425062994	2.7111287371343107e-07	1.4949653682338828e-06
RLOC_00001645	-0.18105074299631047	3.1812678287921727	0.42961560935568166	0.5121776231569853	0.6231850588667167	-0.26517189843017175	5.255504479878213	2.334385806921567	0.126544893616997	0.21589126390719068
RLOC_00001646	-0.19098797384179853	4.259594194425161	0.9813027313088355	0.32187739429614587	0.44147751310699496	0.12251125561389117	5.8385093910911685	0.7437438464556918	0.38846422364876687	0.5059662513771633
RLOC_00001647	-0.5274384042956252	3.2105296070876235	3.5458055302486526	0.059696174760701645	0.12065661198264264	-0.10963290627483403	4.6628774820071985	0.27249284785582706	0.6016644298788453	0.6974330669198637
RLOC_00001649	-0.4138301484686728	3.6780740340211158	3.1406924683000006	0.07636138103456092	0.14711127261401907	-0.1555658147704149	5.167914785489504	0.7618490042950383	0.38275050023148205	0.5008721802231497
RLOC_00001657	0.28791534381356804	4.2835083061314565	2.0903183637380485	0.1482351764474698	0.2456080938045357	0.012286052496861774	6.2034017989478665	0.00930750137209202	0.9231430166313421	0.9471395027472356
RLOC_00001659	-0.5399516987564927	3.502908324086248	4.695680261004776	0.03023852679962009	0.0692289403643874	-0.19273641236827824	5.071628666474993	1.0951730099359152	0.29532787264186044	0.41446855331293875
RLOC_00001660	0.9856118746142469	6.016898907310263	59.74338471683031	1.0806780930674707e-14	1.1695833629919905e-13	0.6632857802291451	7.488934349344565	46.0096947872792	1.1766924595509003e-11	8.952242125235436e-11
RLOC_00001661	2.304864504407994	7.0683825280887	327.9542371194068	2.6813986249418733e-73	1.1259729105855915e-70	2.363098162911229	8.428733546608207	586.2276588379589	1.657488511013988e-129	1.0236454045374037e-126
RLOC_00001666	-0.40340486691189514	2.5557255447235145	1.4364861145475625	0.23070881093567427	0.34383839152161166	0.06835019186430129	3.8304395326408356	0.06140030776054828	0.8042962310661921	0.8591215922234156
RLOC_00001667	0.10220260222537156	2.9626945050841895	0.11611251168061476	0.7332896409119135	0.8095566989476568	-0.02175961231567395	4.300438737686353	0.008424969292811113	0.9268667712244301	0.9496608013160233
RLOC_00001668	0.7648398725117963	4.7718503197123265	19.16777514905869	1.197174459978543e-05	6.0047479602746036e-05	0.5086091783586576	6.383894529811616	17.706949049370188	2.5768352766883516e-05	0.00011819219558737878
RLOC_00001671	-0.5174530099604246	3.6248014419639714	4.485358846260838	0.03418636875929228	0.07632912293446667	0.10565868590987185	4.791799192172759	0.27858091366455184	0.5976328481094355	0.6939335625194607
RLOC_00001677	-0.5503176337748961	3.841141516871977	6.154371047003403	0.013108772359524916	0.034576857344294616	-0.1259489327064224	5.389540968584992	0.5826761791248032	0.4452652518779184	0.5595260178894392
RLOC_00001678	-0.2065468389694347	3.2544651529891953	0.5357108270179225	0.4642157549796503	0.5799520404351266	-0.08291177847177891	4.4719585154812815	0.13708393881500447	0.7111973554143521	0.7877266625693937
RLOC_00001680	1.1134423176556179	5.5048753457553286	60.03085000426914	9.33821640039775e-15	1.0127334273902436e-13	1.474203972382028	7.22451195069127	196.57895506110822	1.165230873941e-44	3.847094008020931e-43
RLOC_00001683	0.44155369210742973	5.233010016826193	8.442245451885636	0.0036660330168956203	0.011553892107886586	0.12112467852732216	6.7279522246261685	1.2037827448528446	0.2725669382055446	0.3901404613796882
RLOC_00001686	1.5973243080626935	5.607794079199766	111.24112221825753	5.239436823047622e-26	1.1225226075174274e-24	1.578398077175002	7.375804652536488	232.3039330322511	1.8745794629336803e-52	8.234815808092346e-51
RLOC_00001690	-0.6662664483962272	2.2255234242850075	3.1763730994799513	0.07471039135525355	0.1446540103057852	-0.3613234715533554	3.6851282627527775	1.5366117221379199	0.21512284896553063	0.32497479011354047
RLOC_00001692	-0.1987040176012946	4.2739749621118	0.9946405847290292	0.3186108139032405	0.4380272818695939	-0.321008566342099	5.481459419703854	4.034826566045351	0.04457025630620796	0.09424836273089171
RLOC_00001693	0.7950771793279052	5.06945211919647	24.438750044851076	7.671013749373228e-07	4.429609589709579e-06	0.47919657667721177	6.22383368371636	14.252103026273417	0.00015988205482574968	0.0006642665981858115
RLOC_00001694	-0.31125101222283846	3.485753611384153	1.556472311746539	0.2121824900916374	0.32329343700754853	-0.3541971715783436	5.024552047438819	3.571506627540465	0.05877895849275785	0.11783851159355826
RLOC_00001700	0.06838890900062518	4.066928272853148	0.10554359262068713	0.7452758800994512	0.8179965303151129	0.017011742233439632	5.308459226509586	0.010017555208413853	0.9202746704615095	0.9450277548097993
RLOC_00001703	-0.5161622658537379	3.9644735557576167	5.773948253246531	0.01626545106852174	0.04151718104822239	-0.0489630843127068	5.581274157418164	0.10204323351149935	0.7493913163475211	0.81625266421129
RLOC_00001706	0.14794309834761807	2.943246728925567	0.23746743251343505	0.6260412819948995	0.7232509495303682	-0.3242884606897513	4.524768587928897	2.1511680251335727	0.14246147425522165	0.23554378239457827
RLOC_00001707	-0.1854475545304197	2.7408790087755848	0.3391280754032986	0.560332946179581	0.6659544060900306	-0.2625611184608963	4.551643951014576	1.4392860459254375	0.23025490866556614	0.34226904800789737
RLOC_00001708	1.3255565072069433	5.897368384823933	96.79396208311842	7.693034952097046e-23	1.3734945735903876e-21	1.4175094232481296	7.18381382063946	180.76095339046057	3.305789647733841e-41	9.535023492186153e-40
RLOC_00001709	-0.08595786037718643	4.2406166933489775	0.1882403834523929	0.6643851838321679	0.7552480411337411	-0.18429230408766306	5.591099261509028	1.4497481862297619	0.22856836245145182	0.3404851358368037
RLOC_00001710	-0.7072424764045322	2.344155753280938	3.8000339970667327	0.05125154222929801	0.10639483692370388	0.14320173633283265	3.8183403735160057	0.2676578498260458	0.6049072511739639	0.7002890318751183
RLOC_00001711	1.0417885100797857	5.365021206011387	48.83911289728874	2.778434176293119e-12	2.5210027642804806e-11	1.0770316582165544	6.8808869892148685	97.23061653338581	6.170511894768167e-23	8.546728810444721e-22
RLOC_00001712	0.7776955644614497	6.153954634644787	37.98885554332852	7.114988231361642e-10	5.4204025002056975e-09	0.3659260343029142	7.348827796571601	13.602135643811863	0.0002259283572025042	0.0009133699739195578
RLOC_00001717	0.16817121858050765	3.9782910154422906	0.6009644351389343	0.4382102868088079	0.5564692864302486	0.11185458648809614	5.021794882333168	0.3606550910531907	0.5481426396418787	0.6502803925057472
RLOC_00001718	-0.22701762095172912	3.3323901651369616	0.7160553373023326	0.39744088622230495	0.5174025822869243	-0.28037761336304373	5.003986320558003	2.2216747930213465	0.13608536519811051	0.22781254666562387
RLOC_00001720	0.07411012833983725	3.177298036922696	0.07132344923375405	0.7894194970595875	0.8520795681813231	-0.5335372165970074	4.751655346942502	6.725723784145729	0.0095032159185406	0.026166867015147588
RLOC_00001721	-0.5929171032047948	3.232089598995484	4.50427436485813	0.03381023883648205	0.07571841939997757	-0.6295405689846654	4.807277371442221	9.658159756630724	0.0018851236527271328	0.006331386190013489
RLOC_00001723	-0.2408206089338961	3.7425217656440015	1.0555375137890866	0.30423518577158204	0.42392633132865254	-0.37619150994617695	5.080749778614223	4.164316155481585	0.041284075276688016	0.08851164107207424
RLOC_00001724	-0.3671607498270884	3.0788630397353822	1.6501509668717298	0.1989383849413045	0.30835009081851683	-0.15724178121811183	4.436485594018243	0.4804941047689133	0.4881985926846628	0.5990370951583243
RLOC_00001725	-0.08400006518828362	2.1218886781368633	0.04455973519641265	0.8328156624353176	0.8832103065204528	-0.4085028159384173	3.683896349421914	1.9576229982241946	0.161767762815749	0.25953541286713766
RLOC_00001726	-0.07308358171907488	4.328869704758258	0.14862634082458848	0.6998515475165696	0.7837680334786589	0.28007955001104345	5.687814754944868	3.558048487728388	0.05925736683638253	0.11867567578759063
RLOC_00001727	-0.23221683428498394	3.748700284923213	1.023257851034789	0.31174748224257826	0.4311560454584821	-0.06261148002426883	5.356648056305534	0.14048317632687413	0.7078011413995701	0.7847929225424106
RLOC_00001729	1.0462444364683248	5.311210928108815	44.19438860775987	2.9733239459540886e-11	2.49312737896374e-10	1.2570097180895823	6.537807015399343	111.77148643275909	4.009612423061866e-26	6.516551212031971e-25
RLOC_00001735	0.19771339679182331	4.565194755375002	1.2101139526792313	0.27130955503128945	0.38766948532985934	-0.09494042958579287	5.99589474317652	0.4865922718298854	0.48545136469736316	0.5967397117383931
RLOC_00001756	-0.42394496197408843	3.5788813311316026	3.0303138103653637	0.0817222093424442	0.15516930603276594	-0.6028136180611471	4.903282035176145	9.452484859078126	0.0021086323881979925	0.006992587316389995
RLOC_00001759	-0.3165693001224821	4.885085552647019	3.7317777482460723	0.05338654484089788	0.11002197639178365	-0.2571995171587065	6.062428511896605	3.6920453808895033	0.054672532756237145	0.11124730564936242
RLOC_00001761	0.21891114852513632	2.934084912584327	0.5150952667038191	0.4729414340060233	0.5881932441885123	-0.1742536496318972	4.381856920123344	0.5675995970793823	0.4512143522649388	0.5651078950768929
RLOC_00001763	-0.34685991429453356	4.360650708506473	3.360206675781047	0.06678968573183135	0.13199512816505374	-0.2977791830323259	5.844203177355775	4.366254981394452	0.036657472231419914	0.08043193332448854
RLOC_00001765	0.647943062438564	4.613673883698557	13.560875595600619	0.0002309493352847224	0.0009541543179138196	0.1871081484822839	6.1721627942763675	2.116231232315998	0.14574479876251348	0.23953892332617863
RLOC_00001766	1.1634262713496482	6.00598852400685	78.01684761376278	1.0216543952060666e-18	1.4243463268092016e-17	1.1564698979285035	7.270322962775273	126.76190884651915	2.0945268194386111e-29	3.8045738888038025e-28
RLOC_00001772	2.282396416234905	6.88259616835835	307.64809998656364	7.105202803095114e-69	2.0719560840803471e-66	2.170510253337284	8.146699796522098	483.77185276952247	3.228520520689487e-107	9.415621374088591e-105
RLOC_00001774	-0.2509417678708703	3.7188251480142274	1.1096883775795892	0.2921496983561919	0.4110692311142344	-0.40942257233205104	4.940619303521107	4.519492467338097	0.03351077094365074	0.07465087717746428
RLOC_00001775	-0.4948552736853397	3.45106567928265	3.8641093645048885	0.04932936854075115	0.1031462606860123	-0.19639385105723897	5.122468655005314	1.1757629640932934	0.2782202628798374	0.3962874155440799
RLOC_00001777	-0.26797366835726905	3.4120816772639757	1.0564215552186127	0.30403276647533084	0.4237005153933391	-0.11519131119460611	4.4273053394653665	0.25598480415688485	0.612892165662619	0.7068828789730679
RLOC_00001784	-0.5543784167669555	3.120809399499403	3.2335494911809697	0.07214416328750142	0.1405920598092055	0.12159459388742536	4.98853874929499	0.41796371163885726	0.5179548652750088	0.6248429427234651
RLOC_00001786	-0.057776626792836745	3.5833283318958733	0.0570962138242086	0.8111457958668411	0.8672378617995823	0.01589103003529555	5.3317946420426825	0.008878009916577057	0.9249318621513412	0.9480483862859446
RLOC_00001787	0.3330149647548901	4.337721475148692	3.0582214491621844	0.08032955157269381	0.15317299696990835	-0.042578052511374406	5.889796009222263	0.09228739137240893	0.7612891055618083	0.8249328433577692
RLOC_00001789	0.7194737050764448	5.4667393005909695	25.42882455643001	4.5900828978488134e-07	2.7162734082083903e-06	0.3104162646732198	6.765657575537819	8.029920255787786	0.004601086517051449	0.013968818225023978
RLOC_00001790	-0.3625070027757345	3.0457356306311225	1.5274258017438553	0.21649919749147323	0.3278962464102033	-0.19524980083284657	4.890545982915546	1.0083022314953154	0.31530991560659977	0.433587269673044
RLOC_00001791	2.0081207695366947	6.327325675954357	220.8668499703078	5.851984419766672e-50	5.077201027992605e-48	1.7907712510637561	7.556811847665399	305.34430464365005	2.2566333723527747e-68	1.7680890877859539e-66
RLOC_00001792	-0.6275275114388082	3.908132338408663	8.026083347562427	0.004610843811058455	0.014083397826154104	-0.05433850139311103	5.662504307810759	0.1317675466608783	0.7166063797324143	0.7911304291073205
RLOC_00001794	0.21195445952749942	3.8915963721990745	0.8755657357427102	0.34941907184291987	0.4705235269634393	0.17641184570798188	5.5470421896696855	1.2970543219650432	0.2547519873977116	0.36979409162041926
RLOC_00001795	-0.09662848350778613	4.123961820934051	0.22564341516318942	0.6347731571235672	0.730044763747065	-0.49441012849573196	5.457169123162142	9.296580296216836	0.002295820110715931	0.00753715301513651
RLOC_00001798	0.2749739926136498	2.4237238078482246	0.5903746689377645	0.4422742731303345	0.5600718117397168	-0.3933599700037489	3.958524179504232	2.1723069495912384	0.14051530174343013	0.23307923244636874
RLOC_00001799	0.11233866386178654	4.273713004635859	0.33788689528641935	0.5610514928832854	0.6664311577606619	0.24517598986445624	5.773422977273606	2.8700191352466593	0.09024379686910529	0.16663201254462479
RLOC_00001800	-0.3627787590326042	4.082271695353534	2.9985657166811643	0.08333826467622749	0.1574667211250965	-0.35195220081515927	5.620128183268836	5.333846176734436	0.020915180583278223	0.050984091233767834
RLOC_00001804	0.0416526770531164	3.358836267935432	0.02396648902799381	0.8769702087475922	0.9147949403945803	0.24218197394207835	5.6198240036916225	2.5551467824559255	0.10993560365620095	0.1939203465703047
RLOC_00001807	0.14148387712756572	3.779812598818651	0.38076622365884494	0.5371934514609441	0.644951607209171	0.536638330402783	5.273422818250587	9.675294546219009	0.0018676232667629222	0.006282658339552682
RLOC_00001816	-0.5462168027773053	2.417610297564005	2.2136367440269087	0.1367958528759858	0.23069604232804805	-0.4773379269230777	4.2850314466918515	3.930231858016353	0.047425405252795386	0.09901537690062008
RLOC_00001817	0.29933166575280623	4.096102942515419	1.786772263130521	0.18131992562778682	0.28671435144457086	0.4264634087387356	5.610567771726565	7.854447918970859	0.005069583040528033	0.01518994073701593
RLOC_00001818	1.2890281355185262	5.023973958030202	58.63557222474401	1.8975451120372494e-14	2.0223785366667052e-13	1.1816466021181542	6.5127538303126045	98.2385096585268	3.709063455451186e-23	5.171508262786454e-22
RLOC_00001819	-0.17486836311084866	3.111849682933315	0.3838747423642707	0.5355368001849349	0.6434041346236491	-0.0447707737797334	4.466219970763574	0.039830455318546454	0.841812443255489	0.8895117594343176
RLOC_00001824	0.20306872926163583	3.004215029713492	0.46603537307206777	0.49481675888706306	0.6079094598942525	0.10776107097345003	5.140252686946108	0.36064961342233914	0.5481456780337044	0.6502803925057472
RLOC_00001826	0.9192248066912595	4.872111161444623	29.606783988580126	5.291940224302267e-08	3.4484660754019367e-07	0.32262272652514695	6.141834399631102	6.153137046450962	0.01311792159172321	0.034482989181647966
RLOC_00001827	1.977456494599824	6.375854365462623	224.99579497228885	7.357453306449821e-51	6.716395200966106e-49	2.1424135431739098	7.681896322461456	427.64286800651075	5.295669338151372e-95	1.1026378905685835e-92
RLOC_00001831	-0.23626996316102872	4.219789383437681	1.4301055712833395	0.231747209969505	0.34489399068044563	-0.16636293459903836	5.986738395782054	1.4845982510764708	0.22305646680617855	0.3344095166354517
RLOC_00001833	0.8789833454582363	4.317994186615641	19.822558218980163	8.497389639075587e-06	4.3493708645058756e-05	0.679575310636449	6.066767231739757	25.664642441192306	4.062016157757052e-07	2.2062652685096374e-06
RLOC_00001834	-0.29978606547006437	3.7367947168016755	1.6872603084772058	0.19396251486443053	0.30233385019254516	-0.42395483559218283	5.191187171458379	5.672152281592428	0.01723629597360044	0.04350093063144976
RLOC_00001840	-0.627119906289295	3.981710389272304	8.456901631266158	0.00363660824510185	0.011468042462324789	-0.3541665701572116	5.507965327038149	5.001717986732425	0.025322171754333628	0.059277030378762266
RLOC_00001846	0.9311338111066523	4.759655104584634	28.804929574402905	8.004711320761987e-08	5.114635389248895e-07	1.0509261623386066	6.258362714172687	67.45871439344454	2.1514544948702635e-16	2.1782180078729893e-15
RLOC_00001847	-0.08302310044359938	3.902939330422287	0.1426515014898575	0.7056591610123633	0.7882538702178963	0.263005738012581	5.8068595340607265	3.364559202426515	0.06661340863116998	0.13038295623017404
RLOC_00001858	1.0324625094003501	6.351126865979164	70.06510839712679	5.737897012082456e-17	7.231265646199473e-16	0.9114019449034673	7.826833411735435	92.04416379688925	8.47635550417531e-22	1.1208218695004606e-20
RLOC_00001859	0.4845767753003888	4.324264105182126	6.070161668430067	0.013748437625960895	0.03597354657597034	0.6821845920951937	5.580758521581876	19.522896679613755	9.940105769160142e-06	4.7653502497905176e-05
RLOC_00001863	0.937659197781711	4.743130710082954	29.43990806940959	5.7677602911819256e-08	3.7330423882138014e-07	0.09398088935372984	6.261888373929179	0.5649269038834008	0.4522819015434818	0.566207760945444
RLOC_00001871	0.6782655143284005	6.479284771864432	31.459420287516252	2.036521712758659e-08	1.3713537485914308e-07	0.5395168612293915	8.126167534710726	34.72247490614348	3.802166348872054e-09	2.4520236177400304e-08
RLOC_00001872	2.271615491056414	7.303184778319901	328.68124125364125	1.8621578400296302e-73	8.145388751929608e-71	1.8992250905735917	8.573900484855624	411.6222882250912	1.625540036121527e-91	3.1604712665259094e-89
RLOC_00001873	0.18072373438026018	5.316176379850026	1.570581104766966	0.21012264328442568	0.32098336112944675	0.10247990920139972	6.599979939608854	0.814589816050102	0.36676674014160104	0.485830752293749
RLOC_00001875	-0.032435784336683066	2.638298484188212	0.009340352254785245	0.9230079235256826	0.94700324288239	-0.4310346561438231	4.315051876637099	3.2798400625419744	0.07013576342951787	0.13604399524576768
RLOC_00001876	0.2801419382159429	4.298580971513877	2.113098815692741	0.14604332000145628	0.24262743683736163	-0.037028980483304205	5.609093164992678	0.05926567453438203	0.8076603586265961	0.8611380222626824
RLOC_00001881	-0.009392676520372236	2.3053732574905847	0.0006454429959870112	0.9797314681849729	0.9853647822556454	-0.3557976864497692	3.889396382825303	1.7043737626223852	0.1917169762702867	0.2968347638787406
RLOC_00001882	-0.43982356590372945	2.9800706277080207	2.11957299891041	0.14542708445838434	0.24210116390921924	0.1120266670441812	4.499796794400268	0.2557125269258374	0.6130811270198414	0.7069454972631868
RLOC_00001884	-0.49956339533715605	3.8597656362065504	5.089792955191008	0.024067064844958914	0.057382704234017416	-0.28432197690917527	5.507701778729309	3.2351766406877105	0.07207253078114378	0.13916045915238381
RLOC_00001886	-0.45611754629727697	2.7871271939402975	1.914917451338079	0.16641804179722153	0.26877793889034335	-0.021569537238901756	4.439435405308919	0.009077205198702032	0.924096901393482	0.947451223045257
RLOC_00001888	1.1001882712069202	4.8164081569111055	36.145244022773795	1.8314491113564382e-09	1.3492317734049045e-08	0.09705828939186853	5.873032931575688	0.4758089935614036	0.49032682833654334	0.6007742565410096
RLOC_00001889	0.6227002661752413	4.252422644851627	9.74424047994875	0.0017988544265601792	0.006147257086597905	0.5473115520017813	5.6924787791111	13.517037356390958	0.00023640733675455876	0.0009527987057912139
RLOC_00001890	-0.29962638532260755	4.490473301056855	2.71768824846656	0.0992416535102813	0.17948130160441592	0.0709300843929436	5.725957934573506	0.23392168058691531	0.6286310855669721	0.7190077733308686
RLOC_00001891	-0.3915299068200947	3.530441686465236	2.3859081865589893	0.12243372113621322	0.21150107608565943	0.5479815454449877	4.861859690728786	7.796470750960447	0.005234838219151474	0.015596074478680853
RLOC_00001895	-0.25134075369693526	3.7583230734145885	1.2015050456218757	0.2730210755571172	0.38969072076119865	-0.17587090478413986	5.196699272467891	0.9916307697722297	0.3193441265010668	0.4378158767478063
RLOC_00001900	-0.2617690716249715	2.6447696453852205	0.5962896606114851	0.4399972006460898	0.5580633819478859	-0.03943672566357314	4.520225057707273	0.03203080098541555	0.8579600731007775	0.9007722807485063
RLOC_00001901	0.9865962994461883	5.3751418309498975	43.50399579201259	4.230945856075858e-11	3.527916568473738e-10	0.8305469000753386	6.869682493508018	58.673305218088814	1.8615006945322088e-14	1.6675679003322238e-13
RLOC_00001909	-0.3897633618231637	3.47412151579965	2.34697170046549	0.12552664694041846	0.21556989032889137	-0.46857243175327873	5.110162180359616	6.539917439838693	0.010548024416083594	0.028520141216704008
RLOC_00001914	-0.10694284931108058	2.7873034862410293	0.11216089983153665	0.7376972674126723	0.8127612213258939	-0.3372832921678664	4.563241883125911	2.3853753023267172	0.12247547578195031	0.21063270916073312
RLOC_00001916	0.694287498210192	5.323303891284351	22.072606810125933	2.6252950519519727e-06	1.4331953954961939e-05	0.1916748053770248	6.728845428393357	3.0186470173639526	0.08231211127340943	0.1551516797593403
RLOC_00001917	0.17356414526001096	3.3907175106486473	0.44942343522364037	0.5026088830013358	0.6146541779875057	-0.3184183047388321	4.923623660731202	2.722985014009181	0.09891288049221907	0.17920972561571002
RLOC_00001918	-0.7944368324044431	3.474552491076105	10.112188315181786	0.0014729196910845139	0.0051285940023234585	-0.4191746324157625	5.135855390654872	5.341118341159923	0.0208281070151803	0.050807224803061796
RLOC_00001919	-0.2746416089981811	4.117587175796502	1.7063933706797432	0.1914539816611039	0.2992234478901695	-0.3546023993220217	5.882524147076301	6.309939116276791	0.012006296241261127	0.03188821255679245
RLOC_00001921	-0.39590541628855025	3.4731083131630274	2.5298373378136505	0.11171173167376575	0.196638121916699	-0.35882982132231206	5.016382135736664	3.6449058826582483	0.0562409825241315	0.11352504452031094
RLOC_00001923	0.3593243294677092	4.044440593975983	2.7904668680890294	0.09482659671478244	0.17407734613508546	0.4251287665030297	5.780208728067782	8.616533459824478	0.003331252242721217	0.010482591825769378
RLOC_00001926	-0.27466545758235295	3.268599382765719	1.0579099108536238	0.3036923702959695	0.42345098995445446	-0.19547177123719306	4.709034502307225	0.8927125875455131	0.3447432795518719	0.46456933538892353
RLOC_00001927	0.003317235242322715	2.725916158447502	0.00010579917162156782	0.9917932059069298	0.9941575269703073	-0.2896478820406987	4.139655102499217	1.3285346319500522	0.2490660756466046	0.3637930896234977
RLOC_00001929	-0.6560941301093184	2.650882287109646	3.975130218030787	0.04617688278561424	0.09761677718150993	-0.3104012608552586	4.636757957819549	2.127970876887171	0.1446321061079342	0.238307043632643
RLOC_00001930	-0.5118633026253311	3.0004079716927934	3.03893970348254	0.08128899648520012	0.15450832608329687	0.14743119830409246	5.013710109141427	0.6232919338066965	0.42982660694060437	0.5456770914473283
RLOC_00001931	1.1048710200991902	5.701627686240668	62.999878465663464	2.0671933667706276e-15	2.3537305818175758e-14	0.806365789553426	6.9012916283961	56.14800443277012	6.721578801466738e-14	5.851563502205579e-13
RLOC_00001932	1.1837149251078283	5.737135918813153	74.85048600204243	5.077456117807342e-18	6.798869174074168e-17	0.6441790348854439	6.808601717794126	34.782837171901484	3.686086804168497e-09	2.380087660329954e-08
RLOC_00001942	0.7751835559528054	4.833153973033375	21.27074980764168	3.987701776307247e-06	2.134772730630978e-05	0.6480776200726125	6.657459180009404	32.941551196307735	9.49715796494095e-09	5.87224154734482e-08
RLOC_00001944	0.6471177073565407	5.113461594229301	17.102783320129696	3.541037261869382e-05	0.0001666239765804786	0.46399678511629416	6.297552356509282	13.98678327096032	0.00018410020941514587	0.0007559124359208511
RLOC_00001947	-0.2883961292048197	3.4359360107678154	1.3159946580541795	0.2513121513706029	0.36652889206565564	-0.3216243506003439	4.972446684060723	2.8602325345148722	0.09079437227813995	0.1674130865030192
RLOC_00001951	0.8397873946133785	5.099365779285786	28.129495189766303	1.1346341673547162e-07	7.16259139440157e-07	0.39331057338659725	6.656204171588229	12.26419912389245	0.00046173133653018854	0.0017718264993532343
RLOC_00001953	0.615414005492966	4.76821409373831	13.407698482376013	0.0002505936941360098	0.001028835588987028	0.7494958698352401	6.343042110939783	37.01194934515872	1.1740751833788824e-09	7.841358365327536e-09
RLOC_00001963	0.2678429596920015	4.856697505904722	2.7244710794222966	0.0988208533127071	0.1790200721444002	0.42334798086692715	6.295106018260796	11.630241653139924	0.0006488812409743924	0.002420108045822432
RLOC_00001967	0.3826367204626976	5.046250491192068	5.759050591205062	0.016403933302430774	0.04181004075578387	0.22392215134444948	6.571068922471136	3.838275341439207	0.05009502492403406	0.1036554329281501
RLOC_00001969	-0.6993395069596924	2.7496084623337946	4.7162017950773185	0.029879673031247583	0.06853327670571054	-0.3626155690682816	5.344924368079857	4.617788923242857	0.03164200104830853	0.07132017368102
RLOC_00001972	-0.7477113443694318	2.2264767850457927	4.001912046905801	0.04544867809455658	0.09634540430289443	-0.007806720931373853	3.8484897965935496	0.0008149101866159469	0.9772261763764443	0.984635088846093
RLOC_00001973	0.6489181848333974	4.362157669724215	11.291635897872023	0.0007785704836278837	0.002890181378050044	0.2931162936826194	5.985846471681233	4.622482112866043	0.03155554382438556	0.07115585365382818
RLOC_00001974	-0.030516422628311383	3.1457678357538694	0.011868437512338126	0.9132482092071912	0.9408517860899993	0.20719607957623998	4.743901463512897	1.0352598602526928	0.30892647138103896	0.4276096272945983
RLOC_00001977	0.6696491403931424	4.2632655896148055	10.47556096849705	0.001209640533643825	0.004301763659279429	0.550553785982571	5.660162720128045	13.417088184103086	0.00024934244157298846	0.0010018546858303887
RLOC_00001980	2.037867244653713	7.353954100734008	271.06177786560215	6.660411267357253e-61	1.2055344393916627e-58	2.105089076230918	8.77640766629599	505.1666674622299	7.141988823857662e-112	2.4188303439252125e-109
RLOC_00001985	-0.39365405577665946	2.9614641117146467	1.7456068827535245	0.18642996290127828	0.2932486890227179	-0.26015744557147924	4.1815939628578755	1.104166964382895	0.29335344510677897	0.41247782612205586
RLOC_00001988	-0.24968787445448495	3.9318259723350546	1.3301835287570416	0.24877257045688914	0.36398807591030274	0.22148634147546015	5.371349348311202	1.7843543594217124	0.1816155439683323	0.28421249010635274
RLOC_00001993	0.9499235656920269	5.523998075282383	43.63570742461465	3.955554504905842e-11	3.3035331099842107e-10	0.7784811932939952	6.927031327402346	52.97732364807999	3.374214108251396e-13	2.8205313632588702e-12
RLOC_00001996	1.1400663915179654	5.4272283651442255	58.57757627369018	1.9543119130792297e-14	2.0765553100714324e-13	0.6218701542623181	6.74915569156455	31.63039717824773	1.8648756018308556e-08	1.1271922247335725e-07
RLOC_00001997	-0.16717115064443547	2.9507150032237917	0.3046708008756531	0.5809689570747227	0.6842059806338837	-0.38054368528703114	4.39397120971618	2.704579477277351	0.10006046324646052	0.18054827713000632
RLOC_00002003	1.7053965665100776	6.392544104870487	183.57932477556946	8.015857437756394e-42	4.165864919879536e-40	1.7569120855740854	8.024429843946182	327.4910232658448	3.382611106721249e-73	3.228548546315127e-71
RLOC_00002005	-0.07636573302112969	3.2198599112601936	0.0713809591395469	0.7893366160371247	0.8520777167257312	-0.0336131118660333	4.504623496576671	0.023077104921441105	0.8792567350516131	0.9167048330416933
RLOC_00002008	-0.16987675298540536	3.412273751488585	0.4177993408484131	0.5180371778723111	0.6285475808181442	-0.3823770918113521	4.718860449579465	3.410206719751629	0.06479432916645096	0.12755965908842465
RLOC_00002009	-0.025409391599744875	4.597997651754793	0.021722383808933543	0.8828280224379669	0.9193531060791283	0.11316384088529417	6.141492785637224	0.7586156826679935	0.383762088684025	0.5016957002980423
RLOC_00002013	0.41390755014179426	5.009508098883044	6.252695395907635	0.012400447131921065	0.033015443568579085	0.0019707130802196523	6.172121752999168	0.00023479119355052092	0.9877745749137126	0.9916470895026839
RLOC_00002016	-0.14453992686557607	2.3645782459426683	0.1600179554477541	0.6891399861791572	0.775494862783663	-0.35345551122429025	3.563806665245268	1.359525872084422	0.24361966898692056	0.3576790525372226
RLOC_00002017	-0.45132390581475446	4.534830976887734	6.317639167526508	0.01195426824194401	0.03201426224590006	-0.373344849236804	6.266838713274306	8.810820054938194	0.0029944941795097585	0.009544382025098044
RLOC_00002019	-0.6618088739974732	3.1898162547081634	5.765021307438376	0.016348286714692788	0.04170700217031467	-0.39105442084925096	4.623769988520715	3.3318844324998054	0.06794898083170531	0.13238009830248174
RLOC_00002025	0.7335917125506951	4.687292327779134	18.132015219876276	2.0610681541142052e-05	0.0001000790632834918	0.17188352404883545	6.282656438238326	1.9134761572188914	0.16657763223249222	0.2656689291825818
RLOC_00002028	0.404956812038037	3.923165867106157	3.0287421101529226	0.0818014118040086	0.1552614755231391	0.06319478157419953	5.570122266140813	0.16905368771941776	0.6809541982402411	0.7625147320098433
RLOC_00002029	0.4957364951698968	5.984478902311359	15.409145804782176	8.656829601952884e-05	0.00038672083898426114	0.42185675468946887	7.1937513507740185	17.2920495592062	3.2052512409361596e-05	0.00014542754009761773
RLOC_00002030	0.044415404164507684	5.4246366450304615	0.09748543829239709	0.7548683319277919	0.8259962214486095	-0.07413423753033578	6.6087397968320305	0.42713956592028735	0.5133958679217293	0.6207696898894663
RLOC_00002035	-0.5303612273737233	3.31221271090456	3.962388048881988	0.04652765259715753	0.09827913419818103	-0.20487906450201926	5.368620418493957	1.5110767720692682	0.21897485400988467	0.3292777130119993
RLOC_00002036	0.7766669731980201	5.11306284531203	24.872787686093737	6.124081809928939e-07	3.583646089221516e-06	0.9039285784873513	6.650497092913309	62.81488955439988	2.2707568697234356e-15	2.163400760002391e-14
RLOC_00002040	-0.0816423283656301	3.6372944979525603	0.11907112117291807	0.730044125102155	0.8069920211985283	-0.5106957181221089	4.938412744970879	6.980427975341337	0.008240590004394427	0.02319516205258367
RLOC_00002047	0.6849875387563306	4.643390473688742	14.980819930866843	0.00010860949756564399	0.00047487817802754293	0.47627563483953617	6.170481088714949	13.598088165677073	0.00022641599419675082	0.0009149890389036516
RLOC_00002048	0.9296217688785963	6.362270509246139	58.22347383854522	2.339705718208756e-14	2.476031313483419e-13	0.8542617729191545	7.7878770595848215	80.51294622951906	2.8880653822404477e-19	3.343086929232906e-18
RLOC_00002049	0.6027395221864482	4.6631008560220675	11.505728943223023	0.0006938201606090945	0.0026153407705832225	0.637268287252364	6.340435528162538	26.888252261892333	2.1556520717794322e-07	1.2083390871122403e-06
RLOC_00002053	-0.25935728371908107	4.073180086172647	1.5521177266611033	0.21282307919455412	0.32394036325713055	-0.4223109083720161	5.464874991674758	6.864591754813919	0.008792033188046867	0.024484762981778267
RLOC_00002059	-0.7848080805772837	3.3307561780398762	8.957024764142071	0.002764046706095479	0.008989145700306796	-0.44415101896467374	5.086425545825709	5.7969046052227755	0.016054413736306485	0.040991072426430394
RLOC_00002060	0.27530149204952153	4.5811041094203295	2.483046185228031	0.1150791775557621	0.20118254887267117	0.0814782274949849	6.013269599743947	0.3624958235186977	0.5471233758309367	0.6493611036456031
RLOC_00002067	0.034635526140476776	5.438854177986471	0.06088787622771541	0.805098079683656	0.8632526470340002	0.0890826186078346	7.128200089999497	0.7602068770607842	0.383263788760229	0.5013564064532325
RLOC_00002069	0.08870472201522354	5.354714732921361	0.37786651335349486	0.5387472596810362	0.6462258606183178	0.00224256030703419	7.042486459003526	0.00046922046504960235	0.9827179772683536	0.9885557193964207
RLOC_00002072	-1.0041738028456282	3.244238828376202	13.363860467700535	0.00025651972853320504	0.0010515205428120213	-0.43441007586489294	5.091986303725174	5.56586908896786	0.01831391737333587	0.04566084504931212
RLOC_00002075	-0.28750107140715914	4.482401064906597	2.5875243233451926	0.10770857035535095	0.19106532132316226	-0.04012222146466882	6.184651824227209	0.09784323250161298	0.7544333531914292	0.819868564425585
RLOC_00002076	1.2967817735494085	5.345173528891499	71.37836573715623	2.948878400107364e-17	3.8031112339468197e-16	1.5331722757230548	6.852965082078158	184.64545619689983	4.690275597313037e-42	1.394991600458628e-40
RLOC_00002077	0.3232453450347933	4.6153449856853905	3.4430340059262576	0.0635189484100704	0.1268050706126719	0.308716378694198	6.124101281576236	5.573261803293338	0.01823675813636384	0.04553835092528975
RLOC_00002078	1.8753231648092503	5.5216779885008025	140.5083722067353	2.0608476208549563e-32	6.199076883591785e-31	1.2235838173443658	6.918743208157816	125.51666439733592	3.9228192392779115e-29	7.064438969670462e-28
RLOC_00002079	-0.118104161309109	4.795041540181458	0.5142593813821987	0.47330079301590283	0.5885704483630595	-0.29829601135551687	6.0168228020992744	4.826256998778418	0.02802941975500143	0.06467711604566155
RLOC_00002080	0.09222748875436443	3.614682594077325	0.1392248801006586	0.7090528054010115	0.7908665906395898	-0.4821597337714238	5.312997231307361	7.908426156216146	0.004920505948249199	0.014798164408670393
RLOC_00002081	0.17936167863543942	4.800793745337744	1.1493466446281086	0.2836859615347366	0.40157521767655957	0.3137424868895234	6.173651412649981	5.945254876170106	0.014756957285735563	0.03817031154051187
RLOC_00002085	-0.24771715786584697	3.1447992265577307	0.7585116371545921	0.38379470368540697	0.5042649310750191	-0.5911535241757754	4.8830088475188065	8.986828216119926	0.002719325885695253	0.008760418065024382
RLOC_00002089	0.37794122515925405	3.961742976286665	2.9533648253565197	0.08569895528889535	0.1609423314173208	0.10407400270424912	5.326796398036973	0.379192496685425	0.5380357155495149	0.6414759229564339
RLOC_00002090	0.10955069355403367	2.9938958886139346	0.13645201209529045	0.7118339839558866	0.793294391037038	-0.4122827612291973	4.544416901364419	3.5034832582023148	0.06123989727846857	0.12165708259728315
RLOC_00002091	0.2401064162078269	3.8305837532162132	1.1058510300464466	0.29298562404607403	0.41197254237209846	0.06703117937225422	5.6068797903257135	0.19452797254187404	0.6591744444344989	0.7442383581156904
RLOC_00002092	0.4667113973753285	6.160906576524313	14.914230267648247	0.00011251108565844952	0.000490507216462792	0.32948475235304503	7.707350149608793	12.04366111074616	0.0005196880086852518	0.0019718844969954675
RLOC_00002093	0.11846654674897443	4.9257156943279075	0.5537269443206352	0.4567988527379997	0.5725244768011551	0.5849138552779012	6.543623205821803	25.60823405054817	4.182508287804562e-07	2.269361990370031e-06
RLOC_00002094	0.1929104580187312	5.240720842756047	1.6443969726630314	0.1997232519387287	0.30920140080412534	0.28438443304299765	6.961731493619549	7.322087033671032	0.00681122699446589	0.019581345075273104
RLOC_00002095	0.3911112853862732	4.748229517387002	4.9211949526483725	0.026529161976130505	0.0622353390894789	0.05055540838513113	6.31140500171992	0.16838862938824217	0.6815478721072871	0.7629353992168043
RLOC_00002096	-0.3184801965666467	2.8444825365243105	1.06651018466611	0.30173504497346926	0.42122533273025003	-0.02914979168752169	4.529932862883409	0.01766427257993186	0.8942669250767037	0.9263846518382153
RLOC_00002097	1.7142495810304679	5.679631295158812	136.5329926814425	1.5255764074603669e-31	4.375819979649981e-30	1.7744416083249686	7.153827685803673	267.2553033262329	4.4989903216904645e-60	2.553237804725848e-58
RLOC_00002098	0.8946104070933064	5.574768640809259	40.91064304483916	1.593509599889028e-10	1.2702098541864097e-09	0.6451451968012502	7.146633429910393	39.51520322142861	3.255152880005815e-10	2.2633013302768906e-09
RLOC_00002101	-0.17137584774434128	3.396587753967643	0.4467948350752726	0.5038609791236519	0.6155615903545434	-0.34045137226707634	5.0601457633038995	3.374037899132304	0.06623123931406269	0.12980432733961997
RLOC_00002102	-0.5999869814469688	3.6048676644431366	6.235155252160772	0.012523861337433495	0.03327651134405893	-0.5890127306665544	4.972524242421339	9.420663467282486	0.0021455387912581217	0.007091734738148523
RLOC_00002103	-0.20967939848940956	3.7168971088498854	0.8028213096413501	0.3702511807562692	0.4910723988571373	-0.2051025045328838	5.335928177253204	1.4763912486690574	0.22433999961421033	0.33590211864654795
RLOC_00002105	-0.30428436212798743	3.468453037421851	1.4759223604636285	0.22441359824828463	0.3367968483789124	-0.31494951685604716	4.654182806565668	2.2182843914211268	0.136384539582603	0.2281914392155775
RLOC_00002106	-0.21611803015967734	2.44377109988456	0.3785668586952302	0.5383712289679246	0.646070091644407	0.23793555914364994	3.970285019174218	0.8143395184664342	0.36684037303144484	0.4858656586927134
RLOC_00002113	-0.43373170768223784	3.3491951721671356	2.689683379076386	0.10099988162366559	0.181806714212147	-0.03142005766571922	5.3485721356586415	0.03518595725573559	0.8512065307366342	0.8963708491678959
RLOC_00002114	-0.4273624281465816	3.234075819673502	2.433454762625831	0.11877088230141203	0.2062283695666926	-0.4363714407092438	4.525672619901066	3.869359871059018	0.04917527354046011	0.10207417890496061
RLOC_00002120	0.9770395060548217	5.0414189785367505	36.7307725750094	1.356216471229948e-09	1.0083258155079316e-08	0.6781890253267921	6.454721703516431	32.57489332830036	1.146867327954366e-08	7.062146672253893e-08
RLOC_00002121	-0.3136821229319716	3.0932954777804684	1.2029016595619844	0.2727425004079357	0.38939898943050577	-0.38755609163260984	5.032768236998418	4.2900632973285475	0.03833573830696008	0.08344913709370934
RLOC_00002126	-0.18256403039285546	4.0213564360657195	0.73852042894561	0.39013525006402217	0.5108056691409459	-0.4732915566158072	5.712591695962074	10.118366645149335	0.0014679903612364324	0.005054913349498624
RLOC_00002127	0.19858631183468692	4.349768450505164	1.0992371645371648	0.29443357575390117	0.41339623890122434	0.4175861334550051	6.046004933060031	9.675810122811477	0.0018670992491530993	0.006282658339552682
RLOC_00002129	1.935513053973466	5.881483647063948	188.16751630194514	7.986060623870792e-43	4.366545022364353e-41	1.8705351609158096	7.32236603830888	308.58490670891376	4.4411503859804356e-69	3.5323968107885295e-67
RLOC_00002133	1.3019201692839428	5.9132879706771115	94.2576089738622	2.770198247355461e-22	4.775294121631795e-21	1.0914374961129842	7.371342472320535	116.91913472332502	2.9901400011709117e-27	4.998961763104045e-26
RLOC_00002138	-0.004336713360244098	4.448968744752822	0.0005743113893315055	0.9808806903245703	0.9862106787518352	-0.1942963969698475	5.926668304431831	1.955872417225847	0.16195544477651735	0.25977974657600394
RLOC_00002142	-0.7154632845990833	3.322303936945706	6.802766945840892	0.0091016712903734	0.025398550028266863	-0.2916779378376792	4.931566673058887	2.2959992190811187	0.12970771386276023	0.22003575502425587
RLOC_00002144	0.8983812488834394	4.552096933174492	24.63397219781828	6.931888095107626e-07	4.022717591069091e-06	0.2487110232700991	6.139482702769346	3.654939689591581	0.055903179049479265	0.11304458336681103
RLOC_00002148	0.5721873212406464	4.940984269199242	12.1452593132481	0.000492127987041871	0.0019064057593968862	0.22462789672093877	6.3885851131411115	3.491281222863666	0.06169282104880373	0.1224410072195445
RLOC_00002150	-0.6477867850113231	3.0305864337730615	4.891231334529641	0.026993427772580226	0.06314104384058539	-0.19522892430941632	4.456352118925143	0.7498713265068586	0.3865169726163909	0.5045432917443103
RLOC_00002152	-0.680397731971683	4.3178296792807025	12.694968889024336	0.00036664070118795617	0.0014574002578838182	-0.5878625234324933	5.843785022167913	16.715412522963106	4.3426761181138696e-05	0.00019385100579964932
RLOC_00002154	-0.6886080301930644	2.8478383453259144	5.010511476751528	0.025193862650696997	0.05976200353475378	-0.5407134602000659	4.06825233607251	4.355677027104437	0.036885795137624584	0.08083155148192872
RLOC_00002158	-0.1284449360685651	3.430223800159045	0.24927852841043752	0.6175835464866823	0.7156851828035313	-0.08030710513502023	4.347520197040733	0.11806395595647601	0.7311438456245497	0.8024544464992837
RLOC_00002165	1.1540288406139017	3.20957500255848	15.022238505700729	0.00010625170458748412	0.0004657329414444293	0.8127807873084844	4.728930055269555	15.399979089474291	8.698925650028345e-05	0.00037445682820683716
RLOC_00002173	-0.48972442905539754	3.0421992483576794	2.772482307247075	0.09589734134544659	0.17520541062382497	-0.2512845167859023	4.139181599516862	1.0016967635407767	0.31690028878204646	0.4352884843884388
RLOC_00002177	0.1096538071978747	3.819806675343945	0.2372002735411497	0.6262355778848764	0.7232865836241172	-0.2563756647451029	5.192711683824768	2.0947182603226615	0.1478089567128859	0.24206453280516146
RLOC_00002178	-0.0015057300121708382	4.043021302793677	5.026435222532655e-05	0.9943432567375614	0.9957660506754669	-0.25601431965700977	5.444276065673308	2.50238446931022	0.11367407096852322	0.19887753226104404
RLOC_00002186	-0.16443058770206312	4.699510143128156	0.9289820575515946	0.3351275765475725	0.4551655958689421	-0.3001366879290994	6.337778314867391	5.976905483273228	0.014494412166078255	0.03758380670082875
RLOC_00002190	0.5293240915726258	4.5902212925213535	9.03330297862194	0.002651050417905191	0.008659218197625607	0.5077914260975259	6.164227318289759	15.379070750877169	8.795714731308855e-05	0.00037846806952463797
RLOC_00002192	0.4606457528682879	4.371835855613165	5.917701858126627	0.01498949772586021	0.03879678183581866	0.36140305137962936	6.129153480771694	7.653034706292553	0.005667689968816791	0.016686785469043043
RLOC_00002200	-0.4010341255723183	3.9362721691529563	3.398220037770024	0.06526681231020076	0.1295219273407349	-0.37670623999798886	5.664152035603234	6.257898397229733	0.012364079104411157	0.032697850508114044
RLOC_00002206	-0.49225161174042953	2.79224100769987	2.445475331118181	0.11786417693097509	0.20502703055863736	-0.4035801032315493	4.140952870619371	2.5633186032415036	0.10936878469433715	0.1931476653500161
RLOC_00002207	1.1610493428155013	4.482008151182886	37.12406141705348	1.1084745863971772e-09	8.306042975016107e-09	0.9717404286291276	6.192247273038522	55.68665778102459	8.499317092584452e-14	7.344389313172358e-13
RLOC_00002208	-0.0048544252448450755	4.0674466119239	0.0005399926702580327	0.9814606326738609	0.9866296774691364	0.39313589590674175	5.427417729074412	5.8550431203799995	0.015532477466511168	0.0398717557263816
RLOC_00002213	0.7149974762758796	4.658175726408887	15.968647872409043	6.440023397727425e-05	0.0002929261942345862	0.27142989361409764	6.224858764055295	4.593201315916287	0.03209900706970419	0.07207174406005652
RLOC_00002214	-0.5018560078666529	3.7824398237611683	4.931403251405154	0.02637289345140726	0.06196840933406247	-0.014921947134577104	5.2930839950058	0.007630641190558229	0.9303904967662976	0.9515856948509819
RLOC_00002215	-0.8019407670283242	3.180440726752651	7.551535354976643	0.0059958965789533945	0.01773096402418387	-0.22163261388242456	4.643905193709852	1.0945808714651726	0.295458460016437	0.4145420782724271
RLOC_00002216	0.21938381527214437	3.8716277062757762	0.9407908514890757	0.33207453785740604	0.4520381870367024	0.4222677964240598	5.578959644127749	7.558968142079926	0.005971217124988914	0.017472633387753237
RLOC_00002217	-0.06410848666815883	4.625716247420791	0.13501108448867427	0.7132919243621364	0.7943834765505797	0.07217645239795749	6.332098224043147	0.3477071181997706	0.5554139533848534	0.6568514219271014
RLOC_00002220	1.0220245861560582	5.694118216432389	53.23791264412197	2.955001800598942e-13	2.901927867416997e-12	0.26702698972019484	6.849666978413309	6.160922815672873	0.01306030543530335	0.03434873415963173
RLOC_00002221	0.0756329795613735	2.4790462607774466	0.046573682617408796	0.8291363470392397	0.8802680284670453	-0.2835929858056917	4.232054506286979	1.3543104119855798	0.24452597600425124	0.3586169339623493
RLOC_00002222	-0.5624878331891165	3.442496050166543	5.016560031306971	0.02510599795593867	0.059575670556384304	-0.11218099184842155	4.625609682298082	0.2779202729265607	0.5980675946261521	0.6943615698308051
RLOC_00002224	-0.07284732433838967	4.337954851426792	0.14013857837928256	0.7081432854972113	0.7901039654745162	-0.06427811795614707	4.930722701575172	0.11245739383627384	0.7373635868581244	0.807216937623545
RLOC_00002227	0.1340997739775765	3.0771728795925917	0.21074411873978338	0.6461847955780646	0.7399266998231372	-0.15913990581220377	4.726676050304057	0.5998308871195004	0.4386425575794876	0.5541887138420024
RLOC_00002230	-0.19098611271224164	4.407666146164583	1.0315836223266643	0.30978701036868944	0.4296095158322987	-0.3283777673205824	5.943941350016007	5.606455964013683	0.01789441931669183	0.044840652946582925
RLOC_00002232	1.6351018744124504	5.930275513561223	141.98028044353805	9.821845981156915e-33	2.997376136923991e-31	1.4245497807161975	7.267850764140302	187.28306173598838	1.245666907302767e-42	3.8129028745690233e-41
RLOC_00002233	1.3392661354058317	5.112645236644579	68.73191911675464	1.1280033890916417e-16	1.3931505386687123e-15	1.5045679313236981	6.537531414453796	155.3254795822549	1.188685530185621e-35	2.761064022437795e-34
RLOC_00002234	0.5272909786939424	4.86751972680222	10.409569541779536	0.001253639631005336	0.004437191114731631	0.4895701422876645	6.123523984230745	13.938920542401766	0.0001888474112102382	0.0007747983471263348
RLOC_00002235	0.9021142670014236	5.123475221816333	32.6212935924286	1.1198116308660154e-08	7.70873971736652e-08	0.6852819134358062	6.468735531747449	33.55420077760784	6.930553271811753e-09	4.333762882713019e-08
RLOC_00002238	0.4843452140391543	2.6656056846238836	1.858833251814092	0.17275952013859447	0.2764949840191123	0.07402911935967645	4.518409280641142	0.11307712404889303	0.7366677065194719	0.8065777714827339
RLOC_00002239	-0.22910560272892577	3.3724528702755188	0.7199828528837973	0.396149533774092	0.5163617836553784	0.11988801561498195	5.116406504956464	0.43900417734992203	0.5076034885280447	0.6153959614383304
RLOC_00002249	0.01214335860676887	3.9324241276029865	0.003095202130573682	0.9556329475233609	0.9696727897835148	-0.1251681060139517	5.451281563416035	0.6044496501910719	0.4368853015900269	0.5523673869693754
RLOC_00002252	-0.5591987689815577	3.5395685123582026	5.109578499074471	0.02379410023964472	0.05682221663234537	-0.515214265710903	5.2349134874848255	8.567252155445965	0.003422633264148254	0.01075231198093732
RLOC_00002255	0.3273933004118364	6.9057412131520906	7.917730533932012	0.004895264048076924	0.014822752228644808	0.21609391207430645	8.48412873502081	5.917432409644483	0.014991790339303543	0.038691938734598794
RLOC_00002262	-0.10131494339079695	3.4299301312464032	0.15731281249817597	0.691642692193112	0.7769785963235195	-0.2144688889301491	4.771611905998355	1.1246180512912005	0.2889262366768072	0.4084336285000403
RLOC_00002263	0.15042848644120219	5.279874510127396	1.056990064833779	0.30390268660675396	0.42357546521477735	0.34398613560766583	6.710145214338892	9.630252170437311	0.001913983282388461	0.00641804870066958
RLOC_00002267	0.5595181279082366	3.5276571456945587	4.990404120347669	0.025488255545520564	0.06030554580051271	0.5532477288530475	4.8676833839263915	7.969427563081928	0.004757398111007824	0.014365235193405563
RLOC_00002268	1.528803123270745	6.38680847938672	150.4170570957425	1.4054059664090872e-34	4.728830716462371e-33	1.3559380111661952	7.510415887424897	182.6063296062375	1.3072989044574141e-41	3.833891396061003e-40
RLOC_00002271	-0.5289404473077214	3.2546442024118005	3.3833084655390753	0.0658597259813352	0.13047808143836917	-0.3713603019075998	4.753358898210432	3.2967777745226625	0.0694159271312904	0.13481276710163112
RLOC_00002272	-0.053362053785501545	4.38114393123852	0.07987180814940587	0.7774712075644422	0.8429965644506833	0.4071250102900758	6.025528101851491	9.084010982892401	0.002578538910711611	0.008355580254185558
RLOC_00002274	0.01817641743888739	4.592906173488043	0.010470972403094692	0.9184965141511862	0.9442201728906338	-0.2816879219885068	6.31420320394793	5.19555728932793	0.022644693249756976	0.05441671650931529
RLOC_00002278	0.2047481683227257	4.459921072979248	1.2872049382212525	0.2565636845600426	0.37208146489573674	0.25904537349891255	6.236843062073166	4.220012500929564	0.03994986640844137	0.08623224659174053
RLOC_00002285	-0.08720214632372422	3.006582867980815	0.08855148530410162	0.7660267821670534	0.8345363003971737	-0.05937757904599651	4.4447214750702315	0.06907175231929386	0.7926931323248702	0.8496666867053406
RLOC_00002286	-0.50779830783185	3.1976096896698385	3.2762315785420384	0.07029015076766144	0.1375663688961428	-0.2557314278197521	4.23677303460193	1.10791919201551	0.2925347176513487	0.4118709937805431
RLOC_00002292	-0.3327420179140431	3.536331812393593	1.8755906391717747	0.1708361477906295	0.27438096667515016	0.11255219139141191	5.128918154915947	0.39022107801252615	0.5321832166651814	0.6366672278677917
RLOC_00002299	-0.5699884461666321	4.14972938166888	7.826438022238149	0.005148746605269485	0.015483111389893741	-0.06764788111305392	5.319572555715727	0.15928143078721202	0.6898189492384946	0.7696502814086031
RLOC_00002301	-0.5418577466611382	3.399175842105754	4.513126617697492	0.03363570209063105	0.07540200737720365	-0.24906123115346465	4.437811381279387	1.2011248606160874	0.2730969707701793	0.3907393153606041
RLOC_00002302	0.03225172840513796	3.8798085482375497	0.021200178024183614	0.8842349502625761	0.9205373371535625	0.33092866707720636	5.536601854367323	4.517578511315995	0.03354828168808955	0.07471858494765637
RLOC_00002309	-0.3543861183761669	4.253967548007982	3.3545430536802616	0.06701980871628102	0.13232536240427273	-0.14164139376152662	5.309558118894729	0.6918494788362537	0.40553601595932687	0.522676483127544
RLOC_00002313	0.5631327725785914	4.256808502685567	7.899017885141509	0.004946164559686692	0.014933803723782255	-0.1367451611930664	5.537879699221863	0.7697871999122088	0.3802828917823527	0.49857518491794717
RLOC_00002315	0.9298859944624972	5.939446296619909	47.65603861367849	5.079553302870175e-12	4.49243054536909e-11	1.1277947383221074	7.383283333793429	124.8924699339943	5.372869958885836e-29	9.609840153039589e-28
RLOC_00002316	0.34085098624543564	3.7070826430562556	1.9452489442913343	0.16309974350497702	0.26484471884226585	0.592584416931143	5.172755289128855	11.023668597912396	0.0008995586495378589	0.003248870402992081
RLOC_00002317	-0.06292032325434141	3.3999424473157926	0.05819773854213928	0.8093675028765438	0.8658613961671744	-0.5319118112317626	4.951894904118788	7.624815393900926	0.0057570562325401625	0.016911956739070835
RLOC_00002321	0.4528526385264753	5.831551935367214	11.052754785928787	0.0008855552037459689	0.0032457820680738807	0.33807201893211747	6.903523171163398	10.0864076622283	0.0014936701345209316	0.005124850569390608
RLOC_00002322	0.7537746908114265	4.711628278474155	18.11194971158394	2.082901531652995e-05	0.0001010924654613645	0.457596393489178	6.113184944724531	12.120026705050329	0.0004988318937092884	0.0018968620253726255
RLOC_00002323	-0.4033695306774748	3.622849787746439	2.910320522662899	0.08801438120173098	0.1643498708388068	0.025758627364122766	5.2714414218860455	0.02242461328079326	0.8809630420284789	0.9179467028837833
RLOC_00002325	0.4481033940035948	4.593956436766886	6.590432790782748	0.010252824326724926	0.028124941150237334	0.6669809160597281	6.27403684976163	28.222801739375257	1.0812329925074192e-07	6.209991897338837e-07
RLOC_00002329	-0.06430099172672424	3.4287297244828694	0.061530739610794694	0.8040926998992713	0.8626842272399131	-0.34620405305562385	5.052003384539246	3.4700499488005523	0.06248942372282168	0.12381137189392429
RLOC_00002331	-0.3467037888898901	3.1627505887316767	1.4903598212089113	0.22216063994879193	0.33408428565856146	0.02556136541269277	4.776101766076497	0.016107775660377355	0.8990065567087847	0.9295518848616832
RLOC_00002332	-0.14595295907304756	3.572942583875102	0.36416174019062186	0.5462039473273408	0.653676361039948	0.09081492289102393	5.230880004520312	0.27183596564410406	0.6021028416926166	0.6976578451529392
RLOC_00002341	1.6883873950199697	6.189457273200522	155.86694131949696	9.05198475311841e-36	3.2995741645221204e-34	1.288660974532031	7.2681565538494475	155.25974551448837	1.2286599917230204e-35	2.8476161706622497e-34
RLOC_00002342	0.4695057031612735	3.2936382437363174	2.966610351512603	0.08499978526676298	0.15982943681362669	-0.02845053056525172	4.96562494670531	0.022509797897740214	0.8807388510061965	0.9178767528689485
RLOC_00002353	-0.3835744548609971	3.7192657677354886	2.6924801497390085	0.10082277183268132	0.18161246717561574	-0.400496366022733	5.612343381947898	6.849619941637044	0.00886601309776622	0.024645028200542107
RLOC_00002356	-0.19171435913013482	3.560712572962274	0.6173700788926371	0.4320262632288543	0.5510826114098845	0.22212011492915176	5.254313098378522	1.6518352591247467	0.19870932648513945	0.30518566687645976
RLOC_00002359	-0.26678641988375695	3.3132293883186814	1.014753377783895	0.31376676368441525	0.4331621809581757	-0.2338081933163325	4.911247036775364	1.4614877624979394	0.2266935504780064	0.33862981924076935
RLOC_00002363	0.683765424687504	4.897730328936376	17.44055740640767	2.9643310834164608e-05	0.0001409399805874366	0.2476842866353028	6.159257603375739	3.6776723210062316	0.05514578598754829	0.11196588804549786
RLOC_00002364	-0.9732690136907205	2.6795534657325764	8.814248037267875	0.0029888736031829476	0.009613111239649075	0.2702905503362455	4.692274248951935	1.6981656515410013	0.19252804470069462	0.2978270136013839
RLOC_00002366	1.307883613162929	5.461546536150114	76.9971867936663	1.7120164902479544e-18	2.3463118948594028e-17	0.9022449526918854	6.833408925742972	67.77384936096736	1.8336538901574912e-16	1.8582560031625e-15
RLOC_00002367	1.1877837980523447	6.3813475997244264	86.91585973690452	1.1323765311189934e-20	1.7791114229731442e-19	0.8400236597139602	7.5078346940624385	73.3139125274339	1.1058567076577709e-17	1.1969473787318491e-16
RLOC_00002371	1.5616716133766184	7.5174479789472315	167.53657466986994	2.5540279719048477e-38	1.0352195231296174e-36	1.3466448337684043	8.558614487124647	218.88465021645695	1.583698732312675e-49	6.204198877071185e-48
RLOC_00002372	1.1978482238610035	6.0152677328298205	84.42648312971329	3.9877037449874625e-20	6.084725859720694e-19	1.1525290187093016	7.3493605942662565	128.93458330945404	7.009078621369827e-30	1.3024480786860498e-28
RLOC_00002373	1.1588524253274204	5.541183550086267	65.84767130914219	4.871556002704794e-16	5.8181564182474324e-15	0.9057759787112931	6.909778671797389	70.59716033223901	4.381472838901562e-17	4.60010833356275e-16
RLOC_00002376	0.08617515745473081	3.068588722442074	0.08811910589123473	0.7665820806914069	0.8346896091911538	-0.26671989707224697	4.56936880996093	1.5033202524193305	0.2201611927941685	0.3307300562521069
RLOC_00002378	-0.27267333974175545	2.41424198024473	0.597837067560021	0.4394044747897112	0.5575810680940877	-0.10041760979259648	3.998767658706917	0.14706062021286748	0.7013603108634198	0.7801192577494477
RLOC_00002381	-0.5298440068397976	3.514112330488304	4.594333265461654	0.03207781717707796	0.07273281311554307	-0.5071226334681345	5.725256723567213	11.669393829528802	0.0006353670856163629	0.00237476647628558
RLOC_00002383	-0.10191736449103331	4.8539627613572	0.3863936987967538	0.5342011442682072	0.6423140089941174	-0.2706000278600244	6.400964428734283	5.057733815167616	0.02451627558702062	0.05786789059984925
RLOC_00002385	0.11891061802855958	4.679568458103375	0.5015666030897048	0.4788125780213647	0.5935263247217247	0.058239243550510286	6.240167904650718	0.2139459027937285	0.6436920697815434	0.7314777617314021
RLOC_00002387	-0.03251186320512615	3.1515202349330522	0.012695739234517944	0.9102879279588116	0.9389051679220141	-0.41485777803379453	4.9567896114849	4.690182748141172	0.03033542089171744	0.06895249706476325
RLOC_00002390	-0.03520260686609209	3.760053458500552	0.021687198452871925	0.8829222723842419	0.9193531060791283	-0.7649332091336734	4.877611268511212	14.764408939425374	0.0001218130787773068	0.0005142402549589642
RLOC_00002395	-0.568789487141231	2.3834476451116835	2.4732923911535813	0.11579514211900997	0.20223214140165807	-0.36150904313391446	4.498852032227931	2.621402875604022	0.10543119218043828	0.18780490103536165
RLOC_00002396	0.19922868176073222	5.595818537059412	2.1669766039279286	0.14100321208673453	0.23627321955092404	0.2726640262040622	6.765458096309935	6.19435793421529	0.012815821036477392	0.03376494480852601
RLOC_00002405	-0.2096819601238467	4.510583679807889	1.4229778387001035	0.2329138866640909	0.3461395784540808	-0.11446643551527433	5.878382513626633	0.6618469909595603	0.41590864235236946	0.5322555870377288
RLOC_00002406	-0.34585538963225726	2.173656348773533	0.8343907371622821	0.3610059665635928	0.4822115620669471	-0.8564650839541064	3.827359821216125	9.087365161271244	0.0025738140906179045	0.008345421290116546
RLOC_00002410	-0.27367304257263003	3.7969384713505354	1.334757749127986	0.24796056976517047	0.3632049757771396	-0.45957440857205956	4.8698142105249245	5.437448877081657	0.019709436090499036	0.04857496936951863
RLOC_00002420	0.9735149613344827	4.149423436169822	21.070039464243067	4.427975959782855e-06	2.3582428929178277e-05	1.088864853568698	5.724018617798104	52.43571374730254	4.445652847715525e-13	3.686801678370087e-12
RLOC_00002423	1.16637033098056	4.921181781589481	48.42167928852807	3.4374694209632964e-12	3.097558281654308e-11	1.0189961576710065	6.404992440834891	69.59610234423504	7.278057787220163e-17	7.573075194055946e-16
RLOC_00002428	0.5772386431659042	5.280462530488904	13.779599243647219	0.00020555627910673837	0.0008566613013348708	0.3225505385608364	6.5289167356671145	7.802632956637892	0.005217016052952594	0.01555180339010485
RLOC_00002431	-0.30451257775236457	3.562420323596106	1.5952556465497132	0.2065768527519284	0.3165798584553725	-0.41191985256084424	5.10121491136834	5.041465224616614	0.02474754954643225	0.058269684388426154
RLOC_00002432	0.4616761644492363	4.852387902251169	7.7358878553141	0.005413393904803175	0.016177002337780737	0.19877287043879815	6.187274165008143	2.4079931612670453	0.12071703303146933	0.208421004735635
RLOC_00002433	-0.3471340413449098	2.933527304565947	1.2771143319838711	0.25843626665870423	0.37411251067058426	-0.40849471974476037	4.648427241967117	3.6960459496288127	0.054541575678224014	0.11106128841072031
RLOC_00002439	-0.6377959606876689	2.8174342815094584	4.126008273957067	0.04222884920238382	0.0907881341238225	0.09517734150507876	4.36814129153985	0.16876058834711127	0.6812156690906553	0.7627261714602528
RLOC_00002449	-0.18062850807480726	3.2979399495987893	0.44655156628866743	0.503977126033273	0.6155615903545434	-0.08339467309350596	5.295629937325502	0.23843614154248116	0.6253379042564962	0.716698853398767
RLOC_00002450	1.5865003006884926	6.8851134236772085	158.10248182844072	2.9393291519671047e-36	1.094222604161371e-34	1.6051379716566179	8.06866626354914	280.84464744124796	4.915116326440893e-63	3.053479663390706e-61
RLOC_00002451	0.43382281865091055	4.679541115057806	6.495657239442481	0.010813831173813362	0.029395028395311416	0.6051474687120753	6.124666059313425	21.203336254617774	4.130448974004205e-06	2.036899191078917e-05
RLOC_00002452	0.06460970187306696	3.9450015028294283	0.08850120022559149	0.7660912866191238	0.8345363003971737	0.43079009094761517	5.741459875848769	8.6636840438933	0.0032461434263245026	0.010246921176482546
RLOC_00002453	1.3324814442914223	5.605705199403227	77.93334539483011	1.0657693075268964e-18	1.4838788050951405e-17	1.2030277891142427	7.104671120788711	130.128954058842	3.8400258290618044e-30	7.264221834111692e-29
RLOC_00002455	1.8614111655757144	6.685581188195154	222.81193402360702	2.2031616379622988e-50	1.9435958718763206e-48	1.584771107475842	7.861616957119362	263.3131635755944	3.253440190521641e-59	1.7790556541815995e-57
RLOC_00002456	1.3314557977726167	5.666631244240545	87.76114749131432	7.385551100398374e-21	1.1729730022992758e-19	1.2925872052503817	6.833242357814952	134.304495199517	4.686716064069252e-31	9.180192529228187e-30
RLOC_00002459	0.6570499345608811	4.762928405059203	15.034749956715519	0.00010554965988743544	0.0004628489262733071	0.6041071463637	6.001173427815222	19.586791466530972	9.613150471763189e-06	4.6149276087353325e-05
RLOC_00002460	-0.3619733887324927	3.80172456158642	2.5956143180890354	0.1071598824094218	0.1903171114082406	-0.06285081421926203	4.763796941137708	0.09642594371083302	0.7561615454067604	0.8210714722541708
RLOC_00002461	-0.3062564403109316	3.9160965554169667	1.838418682738932	0.17513640043252768	0.2792499896325449	-0.32014182535248104	5.1005204520120895	3.06139099073843	0.08017300946804821	0.15193798310560258
RLOC_00002462	0.5322707543585572	4.403009687076068	8.139329099730753	0.00433153073428779	0.013331108076386168	0.41646043552077633	6.047523120657188	9.611437139565858	0.0019336925512436708	0.006471736721551578
RLOC_00002465	1.6892777097233536	5.726464346492038	139.76461407448656	2.9970052497493564e-32	8.938227588599075e-31	1.7627841021453077	7.187800981665277	266.70029019874033	5.944053778222181e-60	3.31950109667844e-58
RLOC_00002466	0.21187813785281248	2.971067127651388	0.49712270635810807	0.48076711562054225	0.5949598193921299	-0.17304339178967787	4.79681295904889	0.7451706122627666	0.38800956429197714	0.5059520189515775
RLOC_00002467	-0.3228387506084351	3.2742053181501696	1.3871743400716374	0.23888286608620027	0.35271340761925885	-0.19728562186293297	5.124179791696018	1.189127673913723	0.2755055854245811	0.39343486688964596
RLOC_00002472	-0.5164505496979895	3.919281170297291	5.177048502463711	0.022887169963379635	0.055031953796509256	-0.22245596761441372	5.625478918463008	2.152397030682101	0.1423474988619136	0.23539240676503875
RLOC_00002473	0.42598101685082174	4.8055756705108	6.57003225767121	0.010371007109074369	0.028404600216817823	0.29157535982447863	6.418662543813101	5.976399211820187	0.014498573676078187	0.03758531482102343
RLOC_00002474	-0.4487206403761022	2.1201250683189894	1.3553498937904003	0.24434501419851692	0.35916185369028714	-0.40713737504824205	3.361334246353864	1.5730094766194895	0.20977050248422074	0.3186775438549897
RLOC_00002475	-0.2381650945588219	3.368200711621047	0.7820997860276098	0.37649971895837775	0.496705178119916	-0.028587485217785962	4.974004140389311	0.022855264035678502	0.8798340615272235	0.9170433646355922
RLOC_00002479	0.25643974559175187	2.8834505977007185	0.6582911154562558	0.41716389277961397	0.5364265735424287	0.07085356082667074	4.223549904588317	0.08502289962608511	0.770602519716941	0.8321048909295653
RLOC_00002481	0.15217568100751513	3.637291478070432	0.40447250601066753	0.52478846083538	0.6341365451424961	-0.4002325368542126	5.167805203684898	4.982153384317669	0.025610086676741205	0.05981764182849965
RLOC_00002487	-0.08649179087315526	3.96644178397688	0.1609654662071638	0.6882691868048786	0.7746810253112058	-0.310859211695958	5.427181304473776	3.6301588476414874	0.05674140058432858	0.11443103433247517
RLOC_00002490	-0.29055724716380626	3.0080302500705676	0.9900367076442955	0.3197334029893397	0.43904351072127457	-0.40854040455101975	4.632790372540275	3.651971600316243	0.05600287955568031	0.11320258614845738
RLOC_00002492	-0.309057743890615	3.3874362184274633	1.4446709087924003	0.2293849789237817	0.3425926175475687	-0.08208454619946635	4.785794297013075	0.16691580490713598	0.6828675026766734	0.7637611495261951
RLOC_00002495	0.5804772552830463	3.7518478166191884	6.062056298701065	0.013811677264941298	0.03611332202424751	0.18225275042865866	5.465603607780714	1.3016402220526153	0.25391383542716195	0.36916259073123997
RLOC_00002502	-0.5057512786193659	4.316995893335213	7.08108686191494	0.007790174623378577	0.022271583114441256	-0.32474718677647363	5.942549387712548	5.47716545437998	0.019266476654921715	0.047651057338050196
RLOC_00002509	-0.026895819931754647	4.554671756547014	0.022453986794573222	0.8808856869722312	0.9178697709016856	-0.028313150645107144	6.124738242189903	0.046876200127694556	0.828590915062246	0.8792577337010836
RLOC_00002513	-0.648884229391836	2.893876292439814	4.502665384523622	0.03384206403574606	0.07575138342159107	-0.16296901439449635	4.704490069438688	0.6189091422282686	0.4314529445523996	0.5472785387043184
RLOC_00002515	1.9566162262240947	7.2854316724100725	235.1586147217169	4.470824898056976e-53	4.889033310396056e-51	1.859504893870862	8.54495089445358	395.10626506406766	6.40111231868495e-88	9.883129152040191e-86
RLOC_00002518	0.8786335697992881	4.450856562059362	21.30729441959598	3.91239920626173e-06	2.0965986149737435e-05	0.8625707825056317	5.970916628608803	38.66010833338866	5.044134981267368e-10	3.46359536745102e-09
RLOC_00002527	-0.5621157159872624	2.0128220697663513	1.9381247690771843	0.16387228847206498	0.2656061887262217	-0.2930985599222694	3.879780435413005	1.1531333025957564	0.2828941989868865	0.40115742941511756
RLOC_00002529	-0.6096457653330898	2.400061462935425	2.958008749585002	0.08545311845625334	0.16053808832386318	-0.43248185121737454	3.85953510067809	2.456615286115037	0.11703072337067509	0.2035291642651512
RLOC_00002534	-0.3081959422353515	3.497879805620784	1.5397649019832502	0.2146528024184764	0.32615792731063326	-0.18389455667364799	4.122520632641412	0.5321021867027792	0.465724395021114	0.5788611842460846
RLOC_00002535	0.5164055738439128	4.404586382009479	7.35871951608578	0.006673830326806941	0.019472448796781342	0.17629898602104108	5.981178781112011	1.6670986398702503	0.19664759879961713	0.3027328306135597
RLOC_00002542	0.024795340646769047	2.565234463209413	0.005346626502286789	0.9417101253935929	0.9604656462044047	-0.24147748289908638	3.851073510621588	0.7694886528262082	0.3803752881553132	0.4986340554804136
RLOC_00002545	-0.6011836047577214	3.3860040015089954	5.3159628076037775	0.02113091394940751	0.051481163759777224	-0.16848735518850058	4.531702312506932	0.5873765151164516	0.4434354009221448	0.5581618839805297
RLOC_00002547	-0.7603546832168377	3.5131429165669434	9.229105573729463	0.0023819797753382456	0.00788584789703592	-0.33720412802695204	5.348200753449027	4.004189164931742	0.04538732327093708	0.09557190273196317
RLOC_00002550	-0.6139408654626756	3.8140923046748725	7.1654712409381744	0.007432016409930381	0.021346459171395115	-0.33655704863706515	5.356246958517073	4.014401614551935	0.04511322939716433	0.09514413650309253
RLOC_00002552	-0.509662199199551	4.604305302913272	8.967961671772153	0.0027475495076805354	0.008941033704783094	-0.5210688629062536	6.0197659432828905	14.564535066871015	0.00013543979214416708	0.0005685172765783386
RLOC_00002556	-0.6925508144270954	3.9084742336135325	9.997297586958073	0.0015677011161777939	0.005435180421940053	-0.058881357813054515	5.10698538725264	0.10496668891469785	0.7459489130249146	0.8137694968670593
RLOC_00002558	-0.5208029358448404	3.936622268609089	5.827041467736072	0.015781642680055726	0.04046792497685027	-0.25014786166927727	5.496763661596002	2.485095840833261	0.11492934719210197	0.20049401932012725
RLOC_00002560	-0.5449101740804144	3.533190430918946	4.969937642460586	0.025791577309414407	0.06081760525476919	-0.49964509121390804	5.162854786414519	7.6905838384815155	0.00555096675918805	0.01640754504637256
RLOC_00002562	0.28578414757040727	3.549500738835475	1.2549411887270807	0.2626108312030765	0.37848551701948063	0.12425336566315978	4.95943817221169	0.4289517818896904	0.5125037415997519	0.6201194863496364
RLOC_00002568	-0.4295459090492313	3.1242145271393755	2.234051598097099	0.13499943541252962	0.22859941843180898	-0.3235716336966515	4.430382968326744	2.009883358912492	0.1562773328858305	0.25264122948931184
RLOC_00002570	-0.459884072495213	4.002636152102819	4.389426602105539	0.0361624731822602	0.07997338181322258	-0.23888371182031076	5.785829358940026	2.721603210447519	0.09899853499819976	0.17929715696844906
RLOC_00002572	-0.6694861910752596	4.215193560909492	11.552226946648249	0.0006766815775532297	0.002556244404877224	-0.516242850009945	5.709017840263499	11.966138833771222	0.0005417608727403576	0.002047497265263144
RLOC_00002574	-0.5703479258399934	3.548261396191438	5.549871165748226	0.0184820472908789	0.046229338208159804	-0.37594759260326205	5.792934218997441	6.71642572447473	0.009552888956997402	0.02626919359861596
RLOC_00002578	-1.0144738125946149	3.3743444101442477	14.94400755308391	0.00011074924875453529	0.0004832276032523323	-0.48310533540909084	5.449868542098525	8.848253462624859	0.0029336948285084595	0.00937621370000314
RLOC_00002580	0.9844928985781851	6.370279228822182	65.11145313761955	7.077950430480022e-16	8.367604011168837e-15	1.2105145353289146	7.885362166918434	160.52858087966723	8.672832044135771e-37	2.1225189657664676e-35
RLOC_00002581	-0.3031457619604061	4.422010070612212	2.732374977725758	0.09833295802090551	0.1785240928931566	-0.23488939715551674	5.790423838447048	2.6396153842474552	0.10422877431005567	0.18630888043211233
RLOC_00002582	0.013752680563421799	2.0600976412540986	0.0011966202690474326	0.9724049216438562	0.9803425398460773	0.19622475431380404	3.9126010537570117	0.5337205353948624	0.46504685550872044	0.5782244121253026
RLOC_00002583	-0.24657341343666095	2.726264228565302	0.5835033203384863	0.4449423982032754	0.5621621490357426	-0.5734254365281944	4.342919317258743	5.852441935628585	0.01555545166990341	0.039920969709683674
RLOC_00002588	-0.09410864634082827	2.3949266847470088	0.07016331434687889	0.7910991429909184	0.8532784139647243	-0.6106133028948326	4.322670119196175	6.526357972765032	0.010628736785658283	0.028642978699715108
RLOC_00002589	-0.7526555118885253	3.3455618526379727	7.840210925643599	0.005109664420693284	0.015374392974616822	-0.4746127789024163	4.852899702610307	5.736211548389812	0.01661860000682716	0.042195569884323665
RLOC_00002591	-0.327114332453715	3.7441122270185097	1.8895218426572882	0.1692558629203496	0.2725645112651987	-0.3382751350296345	5.201658146127901	3.65118446900134	0.056029351562922984	0.11322570112682684
RLOC_00002593	0.2669255660594157	5.379430935221155	3.3508140438622585	0.06717178746177674	0.1326004935640715	0.25007054455853	6.820248431010068	5.3378865709247405	0.020866756347060793	0.05087786225912477
RLOC_00002595	2.3053125990033525	6.83997207177825	318.1789232019759	3.6105609386946387e-71	1.263455624480544e-68	1.9904466928053366	8.06438195524768	410.512017950568	2.835786176351598e-91	5.413258011911896e-89
RLOC_00002596	-0.0895107831041279	4.243345056621502	0.2111427545581046	0.6458731954364174	0.7397483731763111	0.0762314327445184	5.824493656045716	0.2853054334120433	0.5932447458331199	0.689601039249549
RLOC_00002600	0.5952870898238453	4.934274428585129	13.217711562995817	0.0002773160053235869	0.0011310269712070766	0.8398039318099995	6.452202688314387	49.36708616108321	2.1227749687570578e-12	1.6858558545370914e-11
RLOC_00002602	-0.4447358003570085	3.9180397068916037	4.099332830981156	0.04290013898538351	0.09188744543773446	-0.20968671226725988	5.46617958754961	1.7095073431166283	0.19104930268646855	0.29623787164454785
RLOC_00002604	1.4150727722600023	6.855032087454142	132.43639128315942	1.200936013271127e-30	3.2746561733299457e-29	1.043965177374118	8.171255013296246	127.58907233515247	1.380634389868683e-29	2.5253101845350703e-28
RLOC_00002607	-0.29405995045167943	4.5067661726902255	2.802471924449735	0.09411909908659838	0.17334426354580873	-0.1842217932057084	5.954309327716894	1.7857839055840987	0.18144069707468133	0.2840235393748441
RLOC_00002608	-1.292013391902527	1.915181579050121	9.428663621206331	0.0021361990217959813	0.007146531972853478	-0.5495569792049244	3.329740554030859	2.7796298924398366	0.09547022828476022	0.17444168582695746
RLOC_00002610	-0.4537107913780045	3.982258742662828	4.335271414604881	0.037330463697943655	0.08210668508296931	-0.1334828234437158	5.592553835753189	0.7609071288296381	0.3830447880312929	0.5011323650517812
RLOC_00002611	-0.05570065060876863	3.8521501822078736	0.06289367029276449	0.8019794852088328	0.8611274897242497	0.3618921264751093	5.6389669056600775	5.7581852307293175	0.016412014579617103	0.04178218745669252
RLOC_00002612	0.7709079478121196	5.275395001721473	26.464040025881573	2.6848990671371803e-07	1.6264322219738095e-06	0.4784002739998164	6.67031160609019	18.209477531534432	1.9789163560149202e-05	9.189138797788875e-05
RLOC_00002613	-0.23770734035063296	3.8055996580461486	1.1217456222452762	0.28954288661911115	0.4082768601380025	0.011638371758549704	5.438922869273636	0.005191270628645661	0.9425617407177231	0.9603062315182315
RLOC_00002614	-0.4167549397632956	3.4143004979934246	2.4508152946972785	0.11746384331121414	0.20460186279759848	-0.24011298063466519	5.204891160849213	1.8531497324501647	0.1734175057828362	0.2739558220303938
RLOC_00002616	-0.6088752506628301	4.124401768409223	8.999028011985496	0.002701232352199423	0.008812161974328632	-0.006661347266023107	5.985007041411872	0.0023840695564585346	0.9610572169484393	0.9735758124991958
RLOC_00002622	-0.44029697200859136	4.9385685595510855	7.304730520402802	0.006877331018888674	0.01993875201223234	-0.29606638891663883	6.408282496520193	6.072696014629667	0.013728725359044442	0.03590440269350128
RLOC_00002624	-0.1271217091312855	3.905308561622833	0.32259712753142367	0.5700510308520508	0.6739184371491924	0.15758770159864113	5.555903002323015	1.0404216156920878	0.30772343553278675	0.42661935159893416
RLOC_00002626	-0.7778802842341155	2.900763355133074	6.377652071330088	0.011556621638292809	0.031100080481619562	-0.47522203382923617	4.322193620038277	3.9936636723151047	0.04567165530866657	0.09607427551306158
RLOC_00002627	-1.105258649086887	2.532935775484036	10.42529924410881	0.0012430071549878027	0.004402526691316448	-0.7500484253103115	3.762217894367459	6.755892640840061	0.009343859104569838	0.025822894640399774
RLOC_00002631	-0.15319769708776654	4.044841065363132	0.4879392771884934	0.48484798851552785	0.5988862434917063	-0.6771750952349956	5.495575628432435	17.711381787693647	2.570837548188769e-05	0.00011796863382182641
RLOC_00002633	-0.6761792317549189	2.7699637002208224	4.52787992709817	0.033346904960121736	0.07485050422735899	-0.21607980671995958	4.436418890525792	0.9051673164677925	0.3413999318704712	0.4610106604126144
RLOC_00002637	-0.5503298997795829	3.371139382918926	4.455650783708412	0.0347859592051449	0.07740207709529698	0.2428108100449439	5.031236023768173	1.7088837516364128	0.191130262084574	0.2962734044556642
RLOC_00002644	0.9777700668094992	6.052181806180388	57.52931955201507	3.3297856643544486e-14	3.4956089904393e-13	1.0235195912390467	7.492954735296859	106.97464920619828	4.509004637191805e-25	6.872355911949772e-24
RLOC_00002645	0.8654214781968934	5.078468586928261	29.402836401377478	5.879153210649898e-08	3.800452611170113e-07	0.49895001959739826	6.5574384260334835	18.818248582255272	1.437848096060699e-05	6.790808439289824e-05
RLOC_00002650	1.6704319358358801	7.188499874848601	187.7901236066864	9.654145013693948e-43	5.251254629728449e-41	1.4100589441016187	8.185317911019117	225.93902725045785	4.581489402518166e-51	1.8937424109070166e-49
RLOC_00002653	0.1458548137445582	2.9942814688334067	0.24145369417648155	0.6231581461768873	0.7204751342031896	-0.24894715553351487	5.040110134324531	1.7891130587180695	0.18103426523930943	0.2835564300682545
RLOC_00002655	-0.5464693136911921	4.8225291549754505	11.27972913283369	0.0007835798856265218	0.0029059775315570515	-0.2886803116991663	6.3656946039430515	5.6272849644627865	0.017682999245336933	0.044446686396167695
RLOC_00002656	-0.9440532453995234	2.033159448342077	5.5782124698077045	0.018185274783981707	0.0456283495894455	0.03307981547159596	3.5886113849952315	0.012282281533911643	0.9117547593106646	0.939494747493546
RLOC_00002657	-0.06192404236450061	4.921787784366528	0.14451474795527375	0.7038333639153649	0.7870401545390474	-0.09613797297449583	6.155574908715032	0.550665565144826	0.4580458720553028	0.5712566902193115
RLOC_00002659	-0.22467319843263367	3.976531613285394	1.0472385725665734	0.30614392665046575	0.4258302399918165	-0.5120741545417407	5.735227281708519	11.970034694030597	0.0005406293477932721	0.0020439566159458277
RLOC_00002662	-0.2984971480347058	3.0345622091210687	1.0173088964842179	0.31315819803373124	0.43277884668583333	-0.4658406011927017	4.780695531300279	5.256253386691068	0.02186804563352133	0.052938116464454794
RLOC_00002668	-0.5521911912824886	3.6321969459966934	5.385037753210226	0.02031014869419685	0.049933475642079284	0.3129067238011694	4.279937982714483	1.7192113063296204	0.18979459880710356	0.29464046915211894
RLOC_00002669	-0.3668576197055059	4.202665151606525	3.4042006753215137	0.06503061352650234	0.12919973141582544	-0.3823157632768242	5.790374410287327	6.955540969306581	0.008356002892223078	0.023463405821195535
RLOC_00002673	-0.06806044104530236	5.80455299721865	0.2826332976049386	0.5949804317684891	0.6966433830811509	0.07072857307332488	7.203887501113106	0.48952226368896756	0.4841404890806301	0.5955466894970751
RLOC_00002675	-0.08649353582256955	3.8678355700987823	0.15117041595904412	0.6974193667947464	0.7817113509087387	-0.07348013767118676	5.822850520256603	0.2642978873926025	0.6071827047392382	0.7023037586269981
RLOC_00002676	-0.47444138564821225	3.764355616390275	4.155895318088932	0.0414898339780451	0.08952934781120606	0.024511165068932955	5.0078583787649595	0.017158561649467163	0.8957826698850956	0.92749726342442
RLOC_00002699	-0.5555833640122809	3.0009971883700812	3.588601144639452	0.05817719523512886	0.11817805641996572	-0.10259811669671089	4.310022321067917	0.18794366553466801	0.6646336258352907	0.7491130904610539
RLOC_00002703	-0.17001710331636288	3.4345896394452637	0.4565165871126169	0.49925646647680755	0.6120030809287161	-0.7079897731465766	4.622744876147485	10.648193964345776	0.0011017844301701109	0.003897451055376009
RLOC_00002704	-0.2872190080856602	2.9891581569759333	0.9462141508715713	0.3306848283906901	0.4505835994228613	-0.4932473162979101	4.622385973321736	5.262214424583647	0.021793272976705233	0.052805809596683184
RLOC_00002707	-0.15483314024953307	3.671027447859758	0.4334477728179622	0.5103020099914469	0.6212629596300835	-0.34891195224162885	4.9870548915843385	3.3904841045227267	0.06557369376891956	0.12882825802393083
RLOC_00002711	-0.011263203036261446	4.27864579460492	0.003425584653604097	0.9533276661642471	0.9683632161966393	0.46340975666870865	5.722552955651573	9.901240687556859	0.0016516738117057542	0.0056210448457370225
RLOC_00002716	-0.19824036156653685	3.6814229379338337	0.7039230070532732	0.4014686384037822	0.521095173833198	-0.35636811552953424	5.015024882478008	3.5947856063033123	0.05796110440217672	0.11649840289156278
RLOC_00002717	0.944854632476669	5.952641710985969	53.12409129258031	3.1312840448572694e-13	3.0664384237790684e-12	1.0363292515498699	7.323816203516387	104.62917970353926	1.4727192220428173e-24	2.1839094791281834e-23
RLOC_00002719	1.1599772805724966	6.176121343984825	84.8952251442344	3.146019608869263e-20	4.81441892914133e-19	1.219595096124357	7.677657482413528	155.67848317538147	9.952367881453071e-36	2.332364071146781e-34
RLOC_00002725	-0.3480817714912575	3.728747930673513	2.2716123312230416	0.13176275885583918	0.22415255914253765	0.1498098747422378	5.348226651832022	0.8000806291447979	0.37106926382884853	0.48974244878631923
RLOC_00002726	-0.7675881072407119	4.046944726131293	12.952002477237722	0.0003195794731633446	0.001287886874959229	-0.35361051925374387	5.554188321372042	5.165374394241202	0.023041490689641078	0.05512406470240357
RLOC_00002727	-0.35361044905469347	3.608595341614303	2.150506710954302	0.1425228456111552	0.23828712107436012	-0.0669670904887771	5.235406195756315	0.14779156711348662	0.7006548126553737	0.7795861464676523
RLOC_00002734	-0.49595361778818287	3.1603439438915824	3.2062116071681146	0.073359155135532	0.14253644468125393	-0.38825884917642034	4.974350563725922	4.154292725456878	0.041529114350430066	0.08898248399289087
RLOC_00002735	0.9966192132009142	5.419695430983658	45.43611575520031	1.576994827090673e-11	1.3492495268783932e-10	0.6668982938922541	6.585532219978603	33.80970966572968	6.0774779084039356e-09	3.820804823972031e-08
RLOC_00002737	-0.42807329421319706	3.5833051307886636	3.0485651793673476	0.08080850466565437	0.15387768582986389	0.1266341099383205	4.845873974300161	0.41529677094223216	0.519293242891402	0.6258363428281213
RLOC_00002745	-0.35381715089550475	3.4230277277832695	1.9276662262990771	0.16501399776371656	0.2669925388584484	-0.242100431712976	4.73534016819213	1.3936184876730282	0.23779497296645405	0.3511405655660761
RLOC_00002747	1.082093532850137	5.135306397364794	44.335332801486196	2.7667719510202725e-11	2.334853049984793e-10	1.4400736826089329	6.4336349757246944	134.96425797940745	3.3616625454404185e-31	6.651945660901523e-30
RLOC_00002751	0.049487832463260606	2.5092078578070054	0.020705808209283832	0.8855832819904406	0.9213869874895968	-0.7307271795897611	3.899045354694237	7.02178497301377	0.008052391921470552	0.02271414905521744
RLOC_00002752	-0.7195692169525528	2.657933313787526	4.369142790644563	0.03659539697495395	0.08077764454227641	-0.6093631734014645	4.417848341396742	6.92629858163139	0.00849372955646644	0.023799217137267455
RLOC_00002753	-0.45205185651694585	2.257767609528475	1.5069868631600523	0.2195994406390119	0.3313719890510776	-0.3371404081491159	4.061652040697305	1.7084615728979342	0.19118509526498953	0.2962734044556642
RLOC_00002756	0.13442940854312968	4.399477384185082	0.5297349323504141	0.46671832073437386	0.5821778672848689	0.03435085779273203	5.732615205397106	0.054955773785874684	0.8146539044713839	0.8670097661474971
RLOC_00002757	-0.4723165800979077	3.2501507642441108	2.9909779184354157	0.08372959009251234	0.15802553768180652	-0.09467964470876986	4.506268751633035	0.1827533546012804	0.6690176511631862	0.7529265721216359
RLOC_00002758	1.2746701146248773	6.53560200750559	110.74103999048681	6.742758129136475e-26	1.4329043489812695e-24	0.959107684829901	8.000666616163329	105.05503327043141	1.1879032798201593e-24	1.774082010644645e-23
RLOC_00002764	0.4979134646253545	3.995466467667764	4.927987572918523	0.02642507384253289	0.06206049780736248	0.7450530632199396	5.223706293432323	17.852685202823437	2.3868222883853964e-05	0.0001100537865865537
RLOC_00002770	-0.07165224442854483	4.375352830603096	0.15132505857231204	0.6972722874149894	0.7816299490958418	0.49394504442676945	6.169927278156464	14.616493572723876	0.00013175633560803777	0.0005537669205559602
RLOC_00002774	1.7819974166079877	6.981642256640603	209.63965314580508	1.646203759129127e-47	1.1369636225879983e-45	1.4513405400009662	8.028729658682577	231.83547406901357	2.371718077515674e-52	1.0332227425658531e-50
RLOC_00002775	0.37674105980656436	3.9058745272066644	2.7651186717792537	0.09633954227035166	0.17571371529870689	0.6372637106640013	5.734580176060381	18.71833721398358	1.5151837782046337e-05	7.139997525749752e-05
RLOC_00002778	1.680519529036328	5.918872940808771	152.24855999492354	5.591155573610706e-35	1.9565317070588395e-33	1.9854315608927227	7.3678328155572625	346.18716016699955	2.8671626163612318e-77	3.2023766286358055e-75
RLOC_00002779	-0.0436929343305138	4.057685098655399	0.04168666403284682	0.8382182139226385	0.887326289176148	0.4252534701059917	5.361035756038405	6.485548564380487	0.01087549719218925	0.029247398827047886
RLOC_00002780	-0.48287386003406846	5.23954195758715	10.855304292417689	0.0009851317385498155	0.0035723360937119043	-0.44003495392887937	6.925591507191821	17.021499094536402	3.69589623874809e-05	0.0001659675560762027
RLOC_00002793	-0.3694235616860714	3.3771541056260626	2.030651861566869	0.15415447666209395	0.25317798748414616	0.34669990565987335	5.158491364209159	3.771171440112847	0.052143102513956804	0.1071715413973278
RLOC_00002794	-1.0215666067115434	2.8289068362401437	10.660647222228597	0.0010943909153971337	0.0039264920812847265	-0.3107993058784312	4.649318861186023	2.152622178568686	0.14232663023521663	0.23539240676503875
RLOC_00002801	-0.43709262025624446	4.100340086027207	4.385461587313024	0.03624667623065691	0.080108969909355	0.14978705983934582	5.787575571894412	1.079946088233902	0.29870961673622237	0.41820939673471114
RLOC_00002802	-0.8450685753757512	4.248738961837866	18.516444897430098	1.6844464250341146e-05	8.267096105660652e-05	-0.17840056576592261	5.582293485518705	1.3491615034648734	0.24542475738918276	0.3593744111337559
RLOC_00002807	-0.6254387859620975	4.437481249055588	12.000171727146842	0.0005319564853649674	0.002044099261845325	0.4074921271199738	6.304376757092222	10.854952986497308	0.0009853186417828539	0.0035318745032701204
RLOC_00002813	-0.39784548527492164	4.220860868722131	3.8696296849863856	0.049167368625858486	0.10288200833850157	-0.008727897608773065	5.713392959029998	0.0035105616606099233	0.9527529909632395	0.9683401405733835
RLOC_00002816	-0.21838118474301865	3.2079169472336826	0.58946892169749	0.4426245569060689	0.5601997359625926	-0.41172387617453626	5.212802801824325	5.428198045146962	0.019814114232185938	0.04877447048319707
RLOC_00002822	1.765958768791062	7.668568318473414	205.36866227439705	1.4071649916595778e-46	9.349631697748259e-45	1.4471236206723974	8.979747153564233	260.9100910331314	1.086774245388363e-58	5.851304001196114e-57
RLOC_00002826	0.9261140518364989	5.64540681799762	44.2815548677157	2.843831824821088e-11	2.394109582756358e-10	0.7131740071931696	6.750741080545315	41.36431214046405	1.263430334750211e-10	8.968732308683209e-10
RLOC_00002827	-1.4841516949692628	7.69201757045146	115.97980767683327	4.8016061629974866e-27	1.0840271290139272e-25	-0.7697989367123389	9.424650598839966	78.82482209198415	6.786893071958333e-19	7.711643978624518e-18
RLOC_00002830	-0.8764492007188114	4.267653162438375	20.532018033429775	5.8642086586194525e-06	3.0781231249093505e-05	-0.8070827585165736	6.967461398965907	56.85391553866496	4.69418404358387e-14	4.1311180447264925e-13
RLOC_00002831	-1.468884331686954	8.516550703807011	107.72536889677448	3.087254772655124e-25	6.305447588197177e-24	-0.8247648855069576	9.892647308168717	92.02219232714187	8.57098978924162e-22	1.1319097081414816e-20
RLOC_00002832	-0.3914896288515229	4.483526271359458	4.743721358611737	0.029405398253757258	0.0676079436854892	-0.25273673720542544	6.690080934980002	5.12641496135566	0.02356435106139657	0.05606211688049005
RLOC_00002836	-0.9460291569927953	4.534773093146777	28.85943083463043	7.782603472508765e-08	4.978779479244182e-07	-0.8833152680175461	6.938292538666128	66.71871460230452	3.1314802258317866e-16	3.143155916922364e-15
RLOC_00002839	-1.7232192019806134	7.869610733987848	151.419138748396	8.487488301033106e-35	2.9213656453851e-33	-0.87370524490989	9.59521603330394	101.89940788409142	5.8413979001317614e-24	8.435878480534163e-23
RLOC_00002840	-0.5066497081319615	4.486461031122126	8.129812957630959	0.004354323893824508	0.013385561416506495	-0.2596856616802356	6.5791433182333146	5.150132015765664	0.023244605797296102	0.05543959933344202
RLOC_00002843	-1.3978755390102198	8.676200927463482	103.42933437843355	2.6984949775095683e-24	5.2267159176928877e-23	-0.824689525900855	10.145501034805246	92.55446801022359	6.549711232508194e-22	8.70448332026627e-21
RLOC_00002844	-0.5761141473210947	4.6630984340938095	11.319635570564355	0.0007669176330770478	0.0028533326044876337	-0.44674869394191247	6.707930752086746	15.976959934957307	6.411808508736364e-05	0.00028119288860995443
RLOC_00002846	-1.4759567900671704	8.649654792823297	112.78309076985465	2.4072002240698835e-26	5.2556967876922005e-25	-0.8575707209112582	10.027136493403901	99.69242133959244	1.780010654507043e-23	2.5254502515769517e-22
RLOC_00002847	-0.6176027830398421	5.633727790376675	21.06922930743831	4.429848528132936e-06	2.3582428929178277e-05	-0.6356641454755688	7.5429929873347294	42.32240773707899	7.740064887322447e-11	5.588923057221346e-10
RLOC_00002848	-0.5193874195151716	6.038949656724847	17.592696418595224	2.73637252706566e-05	0.000130931808519304	-0.0717635512433656	7.548360922664879	0.5527469824378937	0.4571974458938203	0.5704237652334188
RLOC_00002850	-0.614745211499981	3.6278815711564945	6.721311280238936	0.00952675577099628	0.026409263819360693	-0.31903516512918584	5.407204823443612	3.766292578834576	0.05229542405940113	0.10736207610474235
RLOC_00002857	-0.4652747053152696	3.52013121361119	3.5918486448353173	0.058063618055535095	0.11803870301065209	-0.5964982865215633	5.361930598281344	12.455272131591315	0.00041681364372450386	0.0016076878932636172
RLOC_00002859	-0.10041114855125244	2.74753233761972	0.09540910052294915	0.7574100452038268	0.8279144788160948	-0.7513976892682553	3.7300761455135754	6.635731342337593	0.009995315199306364	0.02725735435779676
RLOC_00002861	-0.24631063016180482	4.188214153613624	1.478226947214138	0.2240521390279765	0.3364053046670579	-0.006575683654985094	5.631127627908948	0.0018980999719935276	0.9652494061031557	0.9762213192059562
RLOC_00002862	-0.5118549097361903	3.501260115628886	4.2547908269808445	0.039139767937093936	0.08528212615267998	-0.4004509680827917	5.30391341273152	5.447004752808123	0.019601906421414225	0.04835536078910431
RLOC_00002869	0.8209169283429648	5.468148614690225	32.177137813116275	1.4073709962513003e-08	9.631408551920567e-08	0.8337347772342217	7.066714942425966	63.80461988191492	1.373910063044027e-15	1.3294637559354137e-14
RLOC_00002873	-0.08781856399859261	4.299206548426428	0.20234851956232802	0.6528318296157117	0.745748481752529	0.08585832131377723	5.6408925018417655	0.32568773702953324	0.5682094060029641	0.6671472325682308
RLOC_00002876	-0.02298430305678532	3.739205098251542	0.009976855286415454	0.9204362527294024	0.9453810567609107	0.1023389623058168	5.319376139762122	0.36558086235913656	0.5454229861134343	0.6478556319951292
RLOC_00002878	-1.1162277435699723	3.115740008406724	15.046500633649528	0.00010489455560709857	0.00046055334369022195	-0.37078621933420725	4.929436512037795	3.6930475285808377	0.05463969658244909	0.11121794773538833
RLOC_00002881	-0.49887011235603096	4.4120857874388415	7.183543440553324	0.0073575256268363885	0.02114986419236813	-0.45304454035277514	6.259191043328808	12.870738430379143	0.0003337598871425183	0.001312905603263132
RLOC_00002882	-0.10583698975628565	3.5684160368518025	0.1877840678116094	0.664767353425702	0.7556006578890233	-0.24248167934374176	5.195032611721601	1.8757807471542938	0.17081446923150564	0.27078078098468633
RLOC_00002885	-0.4079658121327531	3.5202469901300364	2.747599726129092	0.0974005468875166	0.17715019771745485	-0.14589938450588694	5.005605460347743	0.6051487144462264	0.43662027398121095	0.5521652922824299
RLOC_00002887	0.6532781999624836	4.912269965368612	15.054752840895677	0.00010443693962668158	0.00045873598000037793	0.5644078495834567	6.434236964081628	22.443547069430636	2.16411322236534e-06	1.1078022779918922e-05
RLOC_00002890	-0.620155761612339	3.9451095614508747	8.265041537131054	0.004041573649841625	0.01256394438141468	-0.25518530964611885	5.898234027370332	3.3093507068268693	0.06888670476399411	0.13390881564843068
RLOC_00002893	-0.23707168653942678	3.367915772907808	0.8242299944174125	0.36394631059600907	0.4848614681011299	-0.07607295902896893	4.408907632516285	0.1106650209428297	0.7393882855404352	0.8087974171586819
RLOC_00002894	-0.4678840750998097	3.7301366234702615	4.122092022366563	0.042326706379906105	0.09092403592720572	0.5531298238359458	4.191922393700955	5.034366452859526	0.024849174098751835	0.05845652674496874
RLOC_00002897	0.49732891677351904	4.2855655843354885	6.427456938571428	0.011236935568209863	0.030348687829963247	0.05802076313641051	6.706427871730386	0.27335558384623226	0.6010896489245173	0.697022335327867
RLOC_00002904	0.8126885280552285	4.98629250968591	25.334503240411	4.820092089409054e-07	2.8459688838366846e-06	0.8709898220057513	6.365938120119026	50.329238180946135	1.2999818572073318e-12	1.0458627983769942e-11
RLOC_00002908	0.8512030757406909	5.445265981389147	34.77845198046083	3.6943988684726355e-09	2.6383536953214778e-08	0.22225267487583328	6.505949436183011	3.6624126143996976	0.05565299033887982	0.11277759999380413
RLOC_00002909	0.25465003110006695	4.101697516844956	1.3554243701703186	0.24433205499323518	0.35916185369028714	0.25846918061632285	5.634716724017466	2.9364554646679135	0.0866005777792934	0.16152414302311235
RLOC_00002911	1.2611692383776012	4.263681050978838	36.4034912920511	1.6041561395157448e-09	1.184277858835182e-08	0.8148312969535718	5.817149231227462	31.708224479087587	1.791618712627298e-08	1.0847869010307961e-07
RLOC_00002913	0.340084393953202	6.322021840441416	8.351759652156321	0.0038531399384988795	0.012060305031115454	0.1309262142531216	7.760228424629371	1.9276366269783374	0.1650172418572686	0.26378136757909
RLOC_00002914	0.027952283853095942	3.6538372453180195	0.013753217366482495	0.9066428390112419	0.9366204018834893	-0.21673417321551663	5.161523110231093	1.4678214121809479	0.2256897405725909	0.3376360567684433
RLOC_00002916	0.7977881176068434	5.494188555394173	31.236923999390015	2.2838060072890562e-08	1.5290430780944203e-07	0.7079471008370403	6.694617154116018	39.859173220875896	2.729492629603591e-10	1.9041158218078473e-09
RLOC_00002922	-0.007991584525895958	4.422894553134139	0.0018561455752550415	0.9656353644020782	0.9764245863507048	0.19057922360060864	5.70798523872135	1.668096707134592	0.1965136588849631	0.3026102822870677
RLOC_00002923	-0.5919333359911234	4.190631706684803	8.990357537097799	0.002714078931220828	0.008845824470647703	-0.2208349257668943	5.940654782054347	2.5474568909182143	0.11047194565375673	0.1945722122829713
RLOC_00002928	0.15019707736938429	2.6102795848831564	0.19034806026441142	0.6626270877680781	0.7537392098157205	0.06193231589270383	4.072240007392797	0.058807012467060105	0.8083915388525174	0.8615041773029581
RLOC_00002932	1.0492597707443092	5.461282364920944	51.580389026510154	6.872464455126215e-13	6.523248811023057e-12	1.235152745638786	6.8612683636106615	124.71955986792814	5.862049442678902e-29	1.0466948486171055e-27
RLOC_00002941	0.26282626162970796	4.245507590727551	1.7548480494465526	0.18526842398931176	0.29177136439240847	0.023277288158179067	5.6842044059745795	0.02455088341168743	0.875491363399658	0.9141466119615123
RLOC_00002942	-0.6014676478879205	2.5693838480916	3.1847752147928707	0.07432721945521269	0.144123965615224	-0.5003922629009756	4.611944374282099	5.367334292829412	0.020517310274925604	0.05017732135486697
RLOC_00002952	-0.29689062753142587	3.265538583043669	1.2257100173649276	0.268242962686659	0.38438638032822087	-0.5078437344637882	5.067936043243555	7.465302025692692	0.00628994778612383	0.018267817927113163
RLOC_00002954	-0.4703427254669433	4.279927545166696	5.325181311116269	0.021019421783259655	0.05126902645926112	-0.39485493429428625	6.234701136530539	9.6670103314938	0.0018760635809690065	0.0063070097779678504
RLOC_00002956	0.08174919493459729	4.107712549160251	0.15674786218525494	0.692168503630408	0.7774860850751149	0.28147989090075726	5.61850795123207	3.4501521161229878	0.06324594880768998	0.12491360648895068
RLOC_00002961	-0.2842346266873071	2.740132820515083	0.7742773485849055	0.37889706430766823	0.4992671496299612	-0.24238022501222195	4.600120841423892	1.2685070623919557	0.2600469409051976	0.3764280756326581
RLOC_00002962	0.9848397893586537	4.336110779701594	24.660373631881562	6.837570687293328e-07	3.970177935575518e-06	0.7798807061298845	5.982628956652745	31.99288953304295	1.5473792961686956e-08	9.407026769238643e-08
RLOC_00002963	-0.7019663329173891	4.323704061594756	13.914488009123566	0.0001913180662322182	0.0008017792651919468	0.060746243822453236	5.956537940045191	0.19539916568615423	0.6584604212886292	0.74367211307114
RLOC_00002964	0.014430141515335152	2.8176422802942036	0.0021220453675654394	0.9632579133785428	0.9750536664398749	-0.5010845002644821	4.4638635920067475	4.876405948618309	0.027226253030109882	0.06303162746706144
RLOC_00002965	-0.06906372889863363	3.8968372027817963	0.08964150761190481	0.7646334000333338	0.8332940344181395	-0.09806757097549172	5.1555749325275	0.3008522260337858	0.5833486442624274	0.6808111845388201
RLOC_00002967	-0.15016775933809404	3.0310902431846785	0.25364741169108607	0.6145184519965229	0.7135510130582344	-0.34246275740057874	4.865361023797991	3.032250296374737	0.08162473804329622	0.15416048294955334
RLOC_00002974	0.38288394401509096	3.3726058041395626	1.9362316527300525	0.16407828017403436	0.2658169421708353	0.6935018556021079	5.189230254250453	15.18828598073259	9.730516546964595e-05	0.0004159637346359173
RLOC_00002975	-0.20848114953640887	3.128432413351127	0.5524077369915479	0.45733555964079325	0.5728563065396788	0.1009542024847084	4.531656714320517	0.21219503537166162	0.6450523710179379	0.7322981411527203
RLOC_00002978	-0.3136116758524653	3.1594422569932394	1.269377143807152	0.2598835598137394	0.37543107347249705	-0.7264563944678283	4.435390662754399	9.863895838836012	0.0016855380418384373	0.005732576579611841
RLOC_00002982	-0.6140230438503782	3.20360197565412	4.991923250370942	0.02546588962903669	0.06026621039802236	-0.49479342763203726	4.622790174327904	5.295700087387543	0.021378135988752694	0.05191974317509011
RLOC_00002996	0.010679154999684312	5.1105769417389455	0.004873862533662621	0.9443424567991529	0.9624926024112708	0.16841081601235836	6.539417876740381	2.140592679804793	0.14344646280294612	0.23672499417920959
RLOC_00002997	0.02336280680432942	4.239397708905505	0.012931870235957987	0.9094610409093354	0.938641282310771	0.04627699630821684	6.016338926335628	0.11741734739505816	0.7318526423205852	0.8029805509169008
RLOC_00003000	-0.6622762807306067	3.52660273476231	7.249410759995124	0.00709242818207212	0.02049444289991553	-0.6898686186582896	5.428069418836043	17.433757914681472	2.9749533752154026e-05	0.0001354468147718409
RLOC_00003004	-0.513531256160749	3.9126233647326885	5.486220438314188	0.019166934636757026	0.04766986017926445	-0.31586968451393516	5.477650356315313	3.8976191960353423	0.048354585821529086	0.10054991145461745
RLOC_00003006	-0.3816990183764386	3.1042220136618375	1.8199354786765454	0.1773209570928495	0.28183427820752976	-0.13507332687851956	4.498826681625747	0.36979919571526865	0.5431137440172176	0.6456971122677801
RLOC_00003008	-0.684533697114326	3.3791744018672163	7.074665125804606	0.007818143179904032	0.022345457964234285	-0.02895168381093237	4.673124816379304	0.019203314040942	0.8897851916603323	0.923747130153449
RLOC_00003009	-0.48987477320018713	3.5090489909698666	3.8958910913048026	0.048404354826865455	0.10154854455883965	-0.509784067935928	5.068891390331897	7.522961801022567	0.00609174391418728	0.017775769692899457
RLOC_00003010	-0.6632580757173991	2.788374384002701	4.315550822766593	0.037765542654926355	0.0829072912570926	-0.17175971248596414	4.879001460756214	0.7759824997465223	0.37837265729853947	0.49700169260319854
RLOC_00003016	1.1809591080960136	5.076871363115497	53.25191345694642	2.934015339446109e-13	2.8840162016390688e-12	0.78748833097722	7.004038132388052	55.99275261348113	7.273866095919636e-14	6.306219664827436e-13
RLOC_00003022	-0.38499484330058714	4.211785203615502	3.7799120781719298	0.05187138621588548	0.107490290662133	-0.3239671629922493	5.4354255628163894	3.968804698460808	0.046350663652982405	0.09711347389596134
RLOC_00003025	-0.5279047064611884	3.771390430363347	5.217832154302967	0.022356404263905484	0.05394105538094226	-0.1999814782882482	5.405659726383061	1.4851627061533397	0.22296851272282708	0.3343253948981665
RLOC_00003026	-0.3663081659798889	4.562896351469415	4.345050747120974	0.03711666106367851	0.08175633819691502	-0.04968840664310001	5.647286624095136	0.10922173471342378	0.7410319252098905	0.8095477930727714
RLOC_00003030	-0.9655032190533299	3.303017070976221	13.309895971662264	0.0002640090101657592	0.0010796909188625398	-0.5847974723989073	4.496802516834914	6.747029780450861	0.009390388177052587	0.025924702682885756
RLOC_00003033	0.4615046519688565	4.533150003949608	6.657716890130195	0.009872732629883356	0.027210277539647013	0.4373720937904383	6.041087726917628	10.582423368910465	0.0011416790484806683	0.004027717852822089
RLOC_00003037	-0.1644907846836993	3.6190732361850433	0.4759165013803306	0.490277819207861	0.6035338351365062	0.14879168992988565	5.170321846995567	0.7013592776984272	0.40232733385759256	0.5197532518974854
RLOC_00003038	-0.4821779943963094	3.793792663987326	4.5695890587276145	0.03254437131938442	0.07350347971123525	-0.2250175015587975	4.929453293462275	1.3702813777064207	0.24176354501180444	0.355550561574301
RLOC_00003040	-0.9264475432788833	3.9832939839430757	18.425359220933846	1.7669081864932374e-05	8.659664865455652e-05	-0.6294902124099042	5.273820997936518	12.996196228197686	0.0003121243847737837	0.0012366014776377188
RLOC_00003053	-0.4084219503683906	2.845428888220214	1.738783227832644	0.18729307368877976	0.2942095896430959	0.18228647752008925	3.92090662026547	0.4634059778886439	0.4960364720744228	0.6056386696487225
RLOC_00003054	-0.3708015097126336	2.950531198016471	1.5440009990356165	0.2140232456106173	0.32538972229113117	-0.35128031066363186	4.343667072740294	2.2315498122902184	0.13521815554881864	0.22683211494454922
RLOC_00003056	-0.3492963958559394	3.0836899698295226	1.3525526695846866	0.24483235097366832	0.3598278063168935	-0.34387026926633696	4.670710271853581	2.672972432571572	0.10206524049508123	0.18345881868821395
RLOC_00003057	1.0280831780801036	5.731618316262108	57.25591340305741	3.8263690830977385e-14	3.9810924315520375e-13	0.9073478123737762	6.93411071542819	71.58004831692263	2.6623515976102896e-17	2.8291527756387075e-16
RLOC_00003058	-0.7850777637280704	2.911452930568594	5.9631615388796195	0.01460782389683369	0.03788363025418975	-0.2033655832219651	4.458833332978523	0.8138290270582313	0.366990613758383	0.486003336762016
RLOC_00003059	0.02597760890061476	4.305066223819638	0.01757527832829453	0.8945320472805316	0.9280361134846349	0.8647812409725629	5.93901526413296	38.17610655675431	6.463909956996433e-10	4.403931903861489e-09
RLOC_00003060	-0.011315960866531919	2.7302279715880142	0.0011670562573371512	0.9727478048977748	0.9805940518356866	-0.28456711769069665	4.4871859546880835	1.6171625416026156	0.20348788496564088	0.3107971056523514
RLOC_00003063	0.024074973526363612	4.385172043264255	0.016332873841003348	0.8983071452849543	0.9307568506910234	-0.24457866429588748	6.024227444718732	3.265380468034552	0.07075660749598697	0.13711214878190608
RLOC_00003064	-0.24725174620912638	3.3183426826262368	0.8522099634384706	0.35592790072879454	0.47692635371386805	-0.1794996640002845	5.1695757496383	1.0138196421115158	0.31398950675285003	0.4322687487916924
RLOC_00003065	-0.2878487075790201	3.461864349400258	1.3134966526381304	0.25176254194984576	0.3669818335725466	-0.18950632646114238	4.998353954623315	1.0137599497554328	0.3140037534165291	0.4322687487916924
RLOC_00003068	1.8232135299387826	6.759718065723158	207.81247962400408	4.122231608591618e-47	2.791947575935149e-45	1.8259983671355662	7.816506824426008	335.69986450871903	5.512910089391624e-75	5.674514022404183e-73
RLOC_00003069	-0.1366455675741301	2.8992472649130656	0.19446106806208752	0.6592293577457644	0.7510135428773776	0.01758512694831281	4.531916426963753	0.006433670519731205	0.9360701059576515	0.9557327669405216
RLOC_00003071	0.04004604309002317	3.622943866176094	0.02571395583153091	0.8726008712043728	0.9123158994027991	0.2701423178448083	5.363804989968282	2.6323586267812313	0.10470606642329079	0.18676673315972306
RLOC_00003072	-0.7432833248047345	4.2481885012590945	14.546957671778962	0.00013670922222752042	0.0005869829917973453	-0.19116726058206854	5.657172575011194	1.6204624597447927	0.20302731622727022	0.31027420568706116
RLOC_00003074	0.5098227267432037	5.436161965018843	12.027526399066751	0.0005242059744482082	0.0020187506675558658	0.5357246424652125	6.635996174697135	22.40913574401811	2.203235124037679e-06	1.1267299350838572e-05
RLOC_00003075	-0.6652716975762013	3.57124995840442	7.333600868849343	0.006767733763751246	0.019669897301179563	-0.28581561197299443	4.984222723416218	2.2771491335187655	0.13129301366937912	0.2218726771330208
RLOC_00003078	0.6911334881701603	4.9240942796610145	17.106369017025294	3.5343581914056855e-05	0.00016638427037388737	0.7828460552405051	6.603682769872663	46.545847268364106	8.949972310766243e-12	6.843828061961747e-11
RLOC_00003079	1.2082844664338588	5.501280062575945	68.28647236222744	1.4138760521986693e-16	1.731956919017693e-15	1.2309399613534073	6.8237710218324406	122.12635540717673	2.165948601990578e-28	3.771193096567011e-27
RLOC_00003080	0.13644805973943186	3.46338277351371	0.2769618607267246	0.59869947033499	0.69935985752495	0.4210615064595708	4.72192042834767	4.194689960984116	0.04055076751857228	0.08729598281269024
RLOC_00003082	-0.3982352134860249	3.656315360857785	2.878062706306456	0.08979399315063388	0.1667244015354593	-0.03754601458150787	5.169222226855292	0.04454798908797741	0.8328373737761916	0.8824260356520572
RLOC_00003088	-1.592207356209717	4.723471159043868	74.79562761518353	5.2205196736341075e-18	6.98153064124979e-17	-2.0403803548919353	6.2984288343306885	216.04107528358426	6.6063408021024116e-49	2.5130424667127975e-47
RLOC_00003091	1.9306640652573874	7.483492145255937	249.3429664795927	3.6114337364664534e-56	4.6805964648672624e-54	1.5384868785266983	8.76154744075281	286.87638954305885	2.3832811219073573e-64	1.5541657452736238e-62
RLOC_00003092	-0.2398336304267178	4.204291287900489	1.4285518582517156	0.2320009214211961	0.3450758958741452	-0.15733263424305113	5.697727712501194	1.1243433524104232	0.2889851363753957	0.40845721644955585
RLOC_00003097	-0.40315290379050117	3.6588737086821537	2.905493400488403	0.08827823560418674	0.16481325224484303	-0.19958143197850528	5.003461057361056	1.1272041626119371	0.2883724826533852	0.407870496480923
RLOC_00003102	-0.07630781442833795	4.479541952597356	0.1803676868455124	0.671057446540533	0.7603627710504605	-0.3810562956891231	5.89663566168494	7.330478833239274	0.0067794990729227655	0.01950081116893592
RLOC_00003103	-0.038492812734065705	3.5628317772801203	0.025167856078499806	0.8739495163645105	0.9127594032792399	-0.20319713658285304	5.155574163767234	1.2867634808640074	0.25664525769428326	0.3720169212387519
RLOC_00003109	0.9402113780085046	5.828974189498551	47.98725273820548	4.289992084934965e-12	3.8231185829921274e-11	0.9986519153773578	7.167002021881298	93.03940958125334	5.126333843121386e-22	6.864971813639213e-21
RLOC_00003110	-0.4451371150983161	4.324941666574622	5.36049558153543	0.020597919431626102	0.05049344244439751	-0.4664362499288869	6.006669431477244	11.624027654397496	0.0006510526661771916	0.0024273444396996926
RLOC_00003111	0.32077912970583905	6.03998351856402	5.521879303989085	0.018780073077169737	0.04685199790022051	0.15261472091794617	7.1110750434837895	2.217564727151818	0.1364481386033791	0.22826147342206454
RLOC_00003119	1.8281344752662307	6.637781326520386	213.09776319972903	2.8976414928467263e-48	2.0835233145140366e-46	1.4167071325134442	7.795713195009139	211.2626240496564	7.284518755782062e-48	2.6741315530404145e-46
RLOC_00003125	1.1492179481270168	5.425462113265891	55.06326115024771	1.1671220322382887e-13	1.178119912926688e-12	1.078696574222529	6.761426444347321	92.5818649873119	6.45966544585383e-22	8.595694235236927e-21
RLOC_00003126	0.49197871752575506	5.405903581389006	11.331296345651413	0.000762116801194617	0.002841158444226239	0.27959313079896003	6.800159496886439	6.613336235029756	0.010121785755352797	0.02752360234277364
RLOC_00003129	-0.7692326440189889	3.5934083458747805	9.805987464736713	0.0017394461169056375	0.005965601220279446	-0.07654411462608844	4.9166329476731425	0.1579961805223311	0.6910081250467781	0.7707313614008416
RLOC_00003131	-0.4323463312194385	5.042875727327486	7.2131766948052025	0.00723702927232098	0.020820590107104863	-0.39882511466550147	6.478600135351738	11.440430811304832	0.0007186312746386719	0.0026547887939589784
RLOC_00003136	-0.3578543425227337	4.778060068452511	4.511981313091882	0.03365823053660489	0.07543640140334718	-0.42514577742985815	6.137980870032129	10.494302273108326	0.0011974322377584245	0.004201818537508589
RLOC_00003141	-0.28214990692009906	4.970337792971453	3.076154559720563	0.07944816394869264	0.15183812582074918	-0.34626910372536984	6.301550007816225	7.762141432271483	0.005335266709007666	0.015854787766167982
RLOC_00003143	1.3194098211413248	5.050220642864395	62.77304076731184	2.31952160660945e-15	2.6296261151388775e-14	0.7807785295452416	6.246362855582714	37.72678373589077	8.137949550928063e-10	5.515838110729098e-09
RLOC_00003147	-0.11708310588647727	4.804627453526323	0.5139300970589344	0.4734424784792657	0.5886769085722292	0.1771945736611887	6.128357258594295	1.8429752969010664	0.17460262426790352	0.2752895257829583
RLOC_00003148	-0.3823148101917409	3.7254606883460766	2.6015380751489303	0.10676006078702234	0.18976754455505596	-0.047646460637994416	5.526355909521611	0.09282915297802163	0.7606108202829197	0.8244531284483144
RLOC_00003149	-0.3562962706131256	4.125125898019338	2.9001497299584935	0.08857132502258022	0.165174188527163	-0.24419140097262718	5.596654563762852	2.540616495661646	0.1109514576811633	0.19517977171126935
RLOC_00003150	-0.5712483930694944	4.633074635236251	11.18645026124464	0.0008239682816920317	0.003039360162053039	-0.4403426049907829	6.156760303101146	11.39457218387866	0.0007365901042336603	0.002716353882806182
RLOC_00003152	-0.0865335618417314	2.970264630773921	0.08153425190532815	0.7752289074048918	0.8412603958999952	-0.690777880015888	4.372764812953307	8.572306576107408	0.00341314486749476	0.01072571324867629
RLOC_00003158	-0.26290998124348636	4.092666826894047	1.6274211371328553	0.20206011286994563	0.3119910376391659	-0.3660618542484732	5.0741886539236365	3.926659660429362	0.04752625715604644	0.09914130218186601
RLOC_00003162	0.11749653557985128	4.815502452616341	0.49105346934323535	0.4834577519132912	0.5975771491896132	0.26894918826289343	6.259301788864119	4.610815219938742	0.0317709262750548	0.07151864385973421
RLOC_00003163	-0.5111515603143161	2.7578032933578602	2.568259677803823	0.109027617545399	0.19285120960262825	-0.13705006073924889	4.499752879264399	0.3807221642050447	0.5372169995125603	0.6409365088502694
RLOC_00003164	0.6200929871653573	5.032734347276458	14.500732222607677	0.0001401050736518117	0.0005991132640312502	0.8602161116196388	6.286558625119259	46.736970674897734	8.118290141880562e-12	6.225999138028051e-11
RLOC_00003168	-0.4909667077459821	3.992828692306175	5.3456036240881994	0.02077458940751521	0.05082536462365291	-0.2907750354039823	4.735584869647211	2.005756645342499	0.15670308777218883	0.25311164900310934
RLOC_00003169	-0.7826674193233019	3.3508751683514153	8.775470384367797	0.003053084145825992	0.009798617353372445	-0.5977149368187772	4.637125842976763	7.73838772644948	0.0054059046357142464	0.01602932851065314
RLOC_00003173	-0.7094292430250868	3.769207184951642	9.660093539503409	0.0018831403173235602	0.006404019129012872	-0.3412980569966296	4.852836339516996	2.991473575469711	0.08370396707172828	0.15723885315549743
RLOC_00003174	0.9720401098571195	5.540643823136347	45.856549817650105	1.2723699790922727e-11	1.0987052449867768e-10	0.7903557340817713	6.702363590915853	49.5596378128704	1.9243219921774317e-12	1.5352170665555362e-11
RLOC_00003177	-0.2375560271322636	3.3113983423278484	0.7853927361915618	0.37549690687465026	0.49578248375928546	-0.03783564037971688	4.261604258363348	0.02484017474559508	0.8747659665756529	0.9137566294973415
RLOC_00003180	0.8706934298006855	4.9176003190994795	27.948891804187106	1.2456227546225684e-07	7.839656881311585e-07	0.890527764716597	6.396307772980143	53.462909382568604	2.6352149034652627e-13	2.2204752224303205e-12
RLOC_00003185	-0.2009716240701807	4.159902934834506	0.9232022463195957	0.336635569351203	0.4567662152060138	0.00210852259437888	5.415229000037554	0.00016658755010023896	0.9897020856761919	0.9928226827359392
RLOC_00003188	-0.458624132172135	4.438873529807766	6.367124812628001	0.01162538045087798	0.03125307144002997	-0.2836460876215839	6.104485684123573	4.6087297473696385	0.03180958748634719	0.07157498050132001
RLOC_00003189	0.7549966505553786	4.760874813467572	18.72009561116738	1.513787226460333e-05	7.485510270080347e-05	0.783075781170568	6.264787854083051	38.41583444321224	5.7166670348829e-10	3.912600208555121e-09
RLOC_00003190	1.386043508476576	6.527234713938745	126.4266131459718	2.4800523509768375e-29	6.3346933286021515e-28	1.47257463816587	7.778400450610881	226.1388631519722	4.1440268337217675e-51	1.7265134018747952e-49
RLOC_00003193	-0.04483696059773769	4.5267230640022005	0.06514442926092245	0.7985423200606236	0.8588306111386401	-0.3604355423198997	5.5647990799910545	5.404538327773336	0.020084460169684917	0.04931401948585639
RLOC_00003202	-0.11410294862382438	3.6140943661438807	0.21398432098743747	0.6436622973989019	0.7383267917497457	0.16945958649158827	5.353795379626222	1.0293883847636973	0.31030236178706283	0.42872279199925944
RLOC_00003204	-0.0891537563710947	3.8516143579760738	0.15260847477532202	0.6960549662260078	0.7805987646021397	0.3301053781057156	5.724564945279596	5.048477125268354	0.024647592079742882	0.05809947670525831
RLOC_00003205	0.7516795592072328	4.588867413065401	17.61835518756236	2.699700630243796e-05	0.00012929496905246063	0.635573328745216	6.05097734082637	22.269313187859176	2.3696335405093686e-06	1.2065364957229807e-05
RLOC_00003207	-0.2703069351515237	3.384113680743581	1.1056940582094281	0.2930198837376522	0.41197254237209846	-0.4381084008355561	5.10483723833924	5.709486225405937	0.016873477037703186	0.042749670709180926
RLOC_00003211	-0.5875981333318294	3.4180981645837614	5.0013676380575856	0.025327297857333217	0.059996256408095305	-0.09051378671814816	5.057335094697236	0.24044503647091098	0.6238848706301899	0.7155848719681376
RLOC_00003214	-0.5213377357000277	3.339438566455397	3.888232678958076	0.04862556693654543	0.1019311504991721	-0.29682947227365114	4.791210262314248	2.1719374354818735	0.1405490637792133	0.23307923244636874
RLOC_00003215	-0.49715202000216935	3.5083618258219595	3.8478719832791946	0.04980914880769744	0.1039348925031222	-0.34007442850922004	4.9117821700788316	3.0759129647980337	0.07945996851607419	0.15085898905068046
RLOC_00003221	-0.4474340831436479	3.2556777132992165	2.773325018994412	0.09584687598843246	0.1751436908836491	-0.05789876826490993	4.886298090378883	0.08879502158234187	0.7657146616157022	0.8283604567030662
RLOC_00003223	-0.003643495241373599	4.5155537062658455	0.00042279017061463975	0.9835951637111102	0.9879240364178373	0.11513032192889529	5.9391858098390875	0.6955603810072652	0.40427950378894795	0.521569244320492
RLOC_00003251	0.5420977740965603	5.432933995166636	14.582135990572844	0.00013418055346186972	0.0005770698280387989	0.32487528929368614	6.965203642343341	9.564508028190557	0.0019837535578969994	0.0066097837525739755
RLOC_00003267	0.4421646982115171	3.3732535413000946	2.8056710482363214	0.09393153474346562	0.17308991605000915	-0.25584380332349727	5.01208763590528	1.8580873354331104	0.17284571156130857	0.273134726923868
RLOC_00003270	-0.6036980984771103	3.777055481086165	7.011719604287965	0.008097786490715816	0.022994471890596332	-0.4120101300354207	5.459928324070278	6.507468757832738	0.010742231455816993	0.02891863796272375
RLOC_00003272	-0.446211784360449	4.171676941560195	4.545556420570572	0.033004293653854544	0.07431983585975226	-0.3157783582566419	6.05383475366192	5.522189602157125	0.018776742303091253	0.04661551606530032
RLOC_00003280	0.08708629298588258	4.8638013885756575	0.2782900909477837	0.5978241479486082	0.6987997207291476	-0.063765840338527	6.222368416509609	0.253063635610083	0.6149260910708891	0.7083727265913172
RLOC_00003282	0.10741952791085116	4.043240060540118	0.25729510468360883	0.6119845737637415	0.7118685933929926	0.653612245502063	5.674245012036086	18.98926766826412	1.3145577524139662e-05	6.230944398462407e-05
RLOC_00003293	-0.7124844596504727	2.837600526352317	5.323065243027373	0.021044960378335534	0.05130747655637864	-0.46019655443000507	4.706956511737461	4.874601498071511	0.02725473323731454	0.06308365173248795
RLOC_00003294	-0.17555988146486123	2.8845731184439507	0.3152274800520871	0.5744899706004976	0.6777161154471315	0.026475325503789185	4.472648282646871	0.014015268529161018	0.9057617394005477	0.9344200159149406
RLOC_00003296	-0.4913432504576024	3.156165691506722	3.0089970417842498	0.08280351130510301	0.15673841718012466	-0.3261457889211132	4.673058125396317	2.408823975236759	0.12065297560215434	0.20834466954720696
RLOC_00003299	0.1314056908046304	4.2748709607135575	0.4355113355890783	0.5092969373405986	0.6203270969023789	0.39296477876992214	5.562471626093255	6.483680597846499	0.010886931790945577	0.02927065220822986
RLOC_00003301	-0.353249908392379	4.057826668596133	2.8620641680857277	0.09069105141318531	0.16810961801446384	0.23701934671007038	5.679899531089421	2.5401163501307167	0.11098660763178064	0.19517977171126935
RLOC_00003302	0.4156966032299688	4.253084858984534	4.295517501963278	0.03821296490788464	0.08362975456377254	-0.28639056793355816	5.353557336384101	2.9068427765816818	0.08820439141144075	0.16387504962461802
RLOC_00003303	1.5943933626438898	6.123249560266181	148.84865932672338	3.0947221819448747e-34	1.0184449362400405e-32	1.6884320190891984	7.526350122670504	273.35853407616503	2.1035256702712778e-61	1.2407256186616935e-59
RLOC_00003307	1.5247315829056352	6.125258166498715	137.21390417627026	1.0827068708880109e-31	3.1485475707984317e-30	1.5715537492734766	7.381535517655167	230.838075879443	3.913574687965934e-52	1.690889738640096e-50
RLOC_00003309	0.14351248699941455	3.9877232988132643	0.44671650270048713	0.5038983733508761	0.6155615903545434	0.2885708123562804	5.2751807812632325	2.822122402936725	0.09297339180519507	0.17071137470492181
RLOC_00003310	-0.4642224964800616	3.039597891598579	2.404983503813261	0.12094939928130982	0.2091976894539546	-0.23998775936488165	4.415817943686978	1.0998107728530337	0.2943076354996016	0.41353531385309383
RLOC_00003311	0.4684363966022704	4.952981916473801	8.50983544954714	0.0035323200284741625	0.011179468091324016	0.36105568112501746	6.182598108432113	7.909047340531885	0.004918816609959839	0.014797322518042506
RLOC_00003314	-0.4447868478377976	2.3520211703675398	1.5262285750783238	0.21667935203374022	0.3280003904973852	-0.3619030721720043	4.276027620135608	2.2642882301501643	0.13238702399339528	0.223210432777687
RLOC_00003315	-0.6758089205346555	1.9895734037275574	2.849179827515038	0.09142056438319389	0.16923524685148464	-0.6658424870540361	3.8592757600697634	5.716151300982744	0.016809537811185764	0.04261853114697883
RLOC_00003317	-0.23588980236818224	2.7870808402320493	0.5596672744149056	0.4543943338189004	0.5705336343058027	-0.44392955686739005	4.395625268343544	3.6667282809892177	0.05550904579730883	0.11250762004361879
RLOC_00003319	0.49734516512205934	3.387763981285633	3.0891913398351214	0.07881396682907518	0.15103852204666507	0.2363339579965192	4.604096271619023	1.218149791053642	0.2697240620974899	0.38707393766560233
RLOC_00003320	0.9662664749404893	3.4899842199087234	13.474747868593084	0.00024179568010645943	0.000994659502256117	-0.07237550288477143	4.731883439170649	0.12488139973885559	0.7237993613476419	0.7968092161884127
RLOC_00003321	-0.35133658938797097	2.209757934790938	0.8725894409321939	0.35023943806987934	0.47144920354992825	-0.23473123995882328	4.1488862145883045	0.8800062745293808	0.34819996087623434	0.46767071452824627
RLOC_00003322	0.07956657891744005	2.3582471392466373	0.04360881849915188	0.8345831013144587	0.8846152159399215	-0.4397813981315456	4.321404981534697	3.4276800021014404	0.06411210510378341	0.12645368992760136
RLOC_00003327	0.604800939441322	4.974172596706868	13.996192599657931	0.0001831811909938712	0.0007707559691597835	0.38411591698406117	6.2151265350169025	9.124064803354601	0.0025226881118967344	0.008207530984444938
RLOC_00003331	0.7887764438943055	2.8103449796143245	5.861640324108718	0.015474366225405854	0.039835678429208106	0.7530169234378442	4.210126774686199	9.33329782609282	0.0022502701699728266	0.007403819026808119
RLOC_00003332	-0.6029683550129314	3.9455018868514458	7.683103694222147	0.005574021987570878	0.016614447139556808	-0.38670147588508186	5.28559413018818	5.023222554723062	0.0250095825534528	0.058768041009109435
RLOC_00003333	-0.1367952563262983	4.471049180927084	0.5848028881121079	0.4444358759610083	0.561860287311978	-0.022508809471140534	5.998461790193045	0.02739800546267901	0.8685320107001003	0.9086007951714182
RLOC_00003337	0.5875155331837995	5.426449991137367	16.513121788312322	4.831455178486738e-05	0.00022255645662024474	0.30025069769709467	6.624625907189415	7.0648734125083	0.007860986767077223	0.02223397092336847
RLOC_00003346	-0.3134738134912099	3.798427617561324	1.9233966042021757	0.16548270385717093	0.26755543278801486	-0.353428620395567	5.220015286247955	4.033514639513006	0.04460492467821723	0.09428369321453647
RLOC_00003347	-0.15450892668082797	3.8067959603607595	0.46191478657893636	0.49673045221531836	0.6095328491621048	-0.13278662030085658	5.279640542071817	0.5964632605663169	0.43993064300433127	0.5554818786413077
RLOC_00003349	-0.14774658810849703	4.300028056699892	0.6056606539165831	0.4364263444935292	0.554875107725938	-0.21181548755462243	5.571032826443969	1.8882267735969016	0.1694020596445618	0.26919210295266444
RLOC_00003351	0.5210911574682805	4.025585572213758	5.606016719390583	0.017898905758779143	0.045028208160954576	0.29726122217201995	5.514594233867918	3.5860733958472224	0.058265763377062706	0.11703314514937467
RLOC_00003357	-0.15170779300188597	4.553943170375546	0.7287101693367823	0.39330159254342584	0.5139710216209263	0.026180072719112806	5.9230793107428665	0.03562868495632188	0.8502843547743072	0.8957591251028949
RLOC_00003358	0.9550478704445949	5.306750957426631	40.20327668528343	2.2886405406154317e-10	1.8078365985990069e-09	0.9896883749020001	6.929178602582829	84.40838269234642	4.024378898230951e-20	4.87335110179086e-19
RLOC_00003360	-0.29537553398299604	3.6330615290126627	1.4164230730942684	0.2339930460483254	0.34749738257395957	-0.4440937091767642	5.356013948592477	6.943642798004712	0.008411763409471433	0.02358843590706212
RLOC_00003362	0.7044118894484314	4.048248308580682	10.463784696821758	0.0012173760894182643	0.004326341972482376	0.21334179234507594	5.590651421121986	1.9502220241514205	0.1625629275196845	0.2605722406151401
RLOC_00003365	-0.15242951760295204	3.4419435648023615	0.3602600971294594	0.548361819700992	0.6554369103063888	-0.22251468386036646	5.165672182667457	1.5509295134606984	0.21299827196968177	0.32260081612949926
RLOC_00003366	0.13803428669673745	3.954760934418891	0.3433996225791631	0.5578734377237354	0.6637075418431295	0.0323672870124545	5.505737801926241	0.04227364113557064	0.8370990438853958	0.8857793652240243
RLOC_00003369	0.5320428411296257	4.598022615426759	9.084358741490403	0.002578048636238124	0.00844705199226836	0.44093883279611806	6.07294466832699	10.958054045244936	0.0009319763844535828	0.0033578654977275794
RLOC_00003370	0.28451022412133004	4.878111034128058	2.8433926368890243	0.09175030745510519	0.16973403082431837	0.33104778983786043	6.4516972547768825	7.860594483644409	0.005052377793448047	0.015142710377793618
RLOC_00003371	0.8583179944802612	5.789351654758385	39.73637033132671	2.9066196080281084e-10	2.2839590303202906e-09	0.5491465071005617	6.742703853242797	24.662277303626638	6.830819888615092e-07	3.6422944647318366e-06
RLOC_00003372	-0.1398789208509254	3.253197900462146	0.2564556598500509	0.6125656878140374	0.7123077747753396	-0.10577211521799947	4.262319502542679	0.19373981985558253	0.6598220556421	0.7446492273660547
RLOC_00003373	-0.16987325928470917	3.6777928166544323	0.5230555055601789	0.46954119267184447	0.5851174384145215	-0.42269819978057255	4.923989070032426	4.768809002754286	0.028979866985863773	0.06644046011291835
RLOC_00003374	-0.2221926754256915	3.9085891566323716	1.0033239011905235	0.3165075555512983	0.4361638642921409	0.23113769996455757	4.482432247628176	1.0744769843615867	0.29993638621673246	0.4191768874389923
RLOC_00003375	1.1662669064092261	6.603245760769815	92.10280795021797	8.228852785970478e-22	1.3970807104637127e-20	1.2444817571522317	7.899263312011734	169.45337382285786	9.73993808849563e-39	2.5628974935116697e-37
RLOC_00003378	0.4170427451513145	4.415246206652638	4.8798074756497485	0.027172649793827608	0.06348953428346366	0.4589374596897426	5.866969512604739	10.549972345226047	0.0011618982583218073	0.004092173704837523
RLOC_00003381	-0.2678939502327148	4.103998104157695	1.6929218557830927	0.19321625170120252	0.3014391752651544	0.0289915759863527	5.723705953449372	0.03894595296239434	0.8435557746753244	0.8909951789050533
RLOC_00003382	-0.7756084278775756	3.9554614407962423	12.746991363569371	0.00035658228865987306	0.0014217245979306296	-0.4327135745426364	5.247163651473623	6.125004245622863	0.01332829677189574	0.03498344695203334
RLOC_00003383	-0.18264429155853928	3.1591898000552825	0.4027795850425857	0.5256572435912875	0.6346578198069391	0.15116084431763577	4.813848211279145	0.5789290410345052	0.4467324090705842	0.5608326632586468
RLOC_00003384	1.411365517582122	5.334494690255174	80.53861714807812	2.850788829959474e-19	4.1279422257813185e-18	0.9844159876295127	6.447429710126188	66.82152675594648	2.972345397158404e-16	2.9862827105039314e-15
RLOC_00003391	-0.39056834865477347	3.389337572490054	1.9348931607040285	0.16422410123424216	0.2659710914466329	-0.40805891873585765	4.8651918756999235	4.288283354021305	0.03837589401677856	0.0834870516539905
RLOC_00003393	-0.43650330276726296	3.5598521615970427	3.24104169352555	0.07181496386601302	0.14010657696811088	0.43287930803664704	5.351985175482488	6.6765130212671435	0.009769154962011682	0.026758768052742146
RLOC_00003396	-0.5483457781093682	3.8769243715412256	6.077122772732676	0.013694363530581113	0.03586017169968584	-0.4866103775501506	5.256890305705599	7.762757076292371	0.005333448491193843	0.015853871944802988
RLOC_00003397	-0.49575073425373306	3.5360889167629135	4.086038337094395	0.043238876763442013	0.09245849531236984	-0.07934489417580229	5.198771361211397	0.20254770254984855	0.6526722253811528	0.738571318341857
RLOC_00003406	-0.6003648551506311	3.576854838364415	6.234196105708823	0.012530646268519074	0.03328611450579788	-0.5258794016011824	4.995694660378957	7.6551605600650525	0.005661015291129486	0.016676486964525384
RLOC_00003407	-0.6326456600278838	4.148926847861067	9.686354937480182	0.0018564144265042347	0.0063233739939784084	-0.4137023614852831	5.808557907631746	8.207141786413551	0.004172582644116922	0.01280559636965319
RLOC_00003409	-0.3985587007235357	3.3731035447049846	2.4073807705615473	0.12076427370357945	0.2089834781403705	-0.12391661537463415	4.829087737928669	0.3914062627633341	0.5315611351439442	0.6359954823790621
RLOC_00003412	0.10787694978643075	2.0234799805056336	0.07266812531779948	0.7874908822945094	0.8509602966883952	-0.4524038907803072	3.5241075080973423	2.157766905450998	0.14185070918904188	0.2347927787759342
RLOC_00003413	0.3096277875017126	4.57127464270223	3.1616567684855603	0.07538664016150395	0.14561342197156735	0.5143152660296113	6.416610253766414	18.458837337978885	1.7361386588448152e-05	8.130115869407544e-05
RLOC_00003418	-0.6743163526652725	3.6784182777773866	6.892025614490267	0.0086581102387322	0.024302898739628515	-0.22840845051942296	5.305394650693054	1.7917944321153598	0.18070768205625778	0.2831293767957992
RLOC_00003422	0.9294481041805457	5.7267209137121675	44.144245470985915	3.050472501539173e-11	2.555774965774799e-10	1.2218886334342651	7.044383694365272	131.55864371432074	1.8687156087188822e-30	3.580227221886778e-29
RLOC_00003425	-0.24030962803158262	4.835266280009335	2.1910903888056517	0.13881101755466177	0.23330740670650643	0.060050143866413205	5.74834521382352	0.1696289466652142	0.6804417852204518	0.7621035100308859
RLOC_00003427	-1.107311410708488	5.821302852106456	61.51612560206592	4.391319275077178e-15	4.878314259233885e-14	-0.40018124377889164	6.846572254430274	13.6344641914477	0.00022207122914069506	0.0008991615251631923
RLOC_00003428	0.7153470842804956	6.391056192670351	34.084156760285445	5.2779250270369544e-09	3.731155349079727e-08	0.7717622257303862	7.891874959609927	67.35014676973469	2.273251044721857e-16	2.299312400629555e-15
RLOC_00003432	0.7355048139825523	5.203170580066752	23.034943936969437	1.5908344323783697e-06	8.930791374924131e-06	1.1083869335881196	6.4914663439732205	85.92516276018995	1.8687567447694473e-20	2.294745855360752e-19
RLOC_00003433	1.566934027602957	6.72636331344642	165.12978177715806	8.569579335846309e-38	3.3694173733226427e-36	1.6118829872445086	7.95499857544161	276.5453912351591	4.250418241355848e-62	2.564663282528451e-60
RLOC_00003437	1.5877380075667056	6.384763182960655	149.4011657297916	2.343431927168825e-34	7.785236826398206e-33	0.9998859321461403	7.6244018116332555	105.35798312466699	1.0194887156830096e-24	1.52690613779685e-23
RLOC_00003440	-0.02686692801648557	3.97589915344788	0.015721772247628385	0.9002175819452022	0.9322762331321626	-0.3031346818549851	5.471110352934905	3.573650333619327	0.0587031341082807	0.11773146227370375
RLOC_00003441	0.15091681876204333	5.29117981681826	1.0575881656493946	0.3037659136691951	0.4234972857502271	-0.005543167978602771	6.364042236596571	0.002091027712094018	0.9635272404775795	0.9751638740883777
RLOC_00003442	-0.3459954609728667	3.7838555886179597	2.2553781199989036	0.13315092889713553	0.2258188128533326	-0.07648553499003087	5.608884668215183	0.25261956335448676	0.6152365725051177	0.708565370200029
RLOC_00003443	-0.26614157712480707	3.7438096905096514	1.357000543710898	0.24405799068092457	0.3588404462420653	-0.32002289976235926	5.141095935229727	3.140689065853596	0.07636154032746652	0.14608597155577097
RLOC_00003445	-0.23367390998766954	4.309380766402636	1.5192956562507078	0.21772611257173324	0.3291128480601952	-0.20736160835560788	5.617435473803704	1.8614632105688829	0.17245601974229235	0.27268309507143484
RLOC_00003447	-0.12618755928075126	3.7225913586224086	0.3003603330931227	0.5836566124462637	0.6867548887537408	-0.4094875514959305	4.865835009807726	4.318573112630401	0.03769852117538457	0.08233340846817885
RLOC_00003452	0.260886581265498	4.687301674118674	2.355079035087394	0.12487555615904374	0.2147772898433198	0.14658892134001342	5.87799798143997	1.0888376570312985	0.29672889002412256	0.415914738240631
RLOC_00003453	0.44266988955564135	6.350696251696147	13.989469176333273	0.00018383740175186792	0.0007725880879067692	0.45544253986737715	7.806138221772463	23.421036719440004	1.3014748582886076e-06	6.774508942574165e-06
RLOC_00003457	0.2035710896005136	3.986362378337943	0.8606898336084394	0.3535457185531017	0.47461930350005904	0.6844829976711215	5.599370385131546	19.870898373326206	8.285200543298203e-06	4.0030520250385565e-05
RLOC_00003462	0.9386218332567029	5.702781734284803	44.429148346276406	2.6373103892694163e-11	2.2273921533829714e-10	1.172734576912129	7.180332369368489	126.72477598788991	2.1340858002929304e-29	3.869735201601982e-28
RLOC_00003463	0.26335921120920347	4.481075875463603	2.1279416962640787	0.1446348599779615	0.24108872023636704	0.6120499341815983	5.758602816827594	17.542224024433622	2.809975763832315e-05	0.00012832507848836657
RLOC_00003480	0.20550948524100573	5.349595290071504	2.0273391179730123	0.15449088496807828	0.2535321729552737	0.3008432978910688	6.653682737614333	7.18307009802713	0.0073594669066506056	0.020979376338019197
RLOC_00003483	0.411373633227638	4.973813907772713	6.728628026627922	0.009487754871110927	0.026328958666910523	0.3603395426093536	6.3252748091580795	8.616242275758076	0.0033317848292782563	0.010482591825769378
RLOC_00003487	-0.8284781963937007	3.634363752601347	11.865629312082277	0.0005717944541558627	0.002185429797152507	-0.5772665341723895	4.77554582468046	7.975675099085725	0.004741007208178029	0.014328104398002627
RLOC_00003493	-0.12812739830549147	3.9201015451908825	0.331936902597711	0.5645207893557022	0.6691364950055587	-0.2974404951259724	5.4194131924723195	3.3068610782731596	0.06899115487503286	0.1340622126657357
RLOC_00003495	0.15318745088309746	3.9576791029357694	0.47730012017932566	0.4896478030409653	0.6028996758531614	0.23078590927276174	5.089667453865366	1.59832314352516	0.20614100769621446	0.31402705162544337
RLOC_00003497	0.7358264325630945	4.50107206019368	16.131887423728195	5.9080867052011924e-05	0.0002695484321216954	1.0068908295355063	6.00970077773658	53.19666409736785	3.0177083641489995e-13	2.53260752319747e-12
RLOC_00003510	0.6993688352732026	5.060921323726311	18.66760213392282	1.556040683299719e-05	7.672764252362821e-05	0.5921072391910581	6.228809223172903	21.72181073668412	3.1518731657405607e-06	1.583593196553955e-05
RLOC_00003517	-0.24856551412440614	2.9650143085256375	0.6371776831065352	0.42473465059145693	0.5437639465742823	-0.22843398994240977	5.050967651944293	1.5193383077384057	0.2177196544747434	0.32771880320148117
RLOC_00003522	-0.6626557567524765	4.293440919267731	10.71999943561417	0.001059837046183318	0.0038142507064903913	-0.5453303255436543	5.9756332260838425	15.518756822280807	8.1690633610143e-05	0.0003533780019630307
RLOC_00003532	-0.45993690891129924	3.0884164046735485	2.6283449366622813	0.10497108329032383	0.1871898135522031	-0.5647921363702402	4.315306864194445	5.577359880995917	0.01819413038191976	0.04545934671103654
RLOC_00003535	-0.7230838610989321	3.334845390410139	7.485165325823232	0.006220935712958605	0.018308770147081422	-0.8457853069858197	4.657869146408885	15.373791413850919	8.820324766762886e-05	0.0003793715269407765
RLOC_00003538	-0.7214584294791468	3.2986309000767595	7.383986599270367	0.006580713874255509	0.019227269850940944	-0.33667065477269564	5.001823647880126	3.1863657555743634	0.07425492192763915	0.14265369173253126
RLOC_00003540	-0.42305148358904154	4.656719727348839	6.15214024182672	0.01312531697872391	0.034611800462859485	-0.29149387901627943	6.4141905865806566	5.907327244166468	0.015078031784039329	0.03888584026053277
RLOC_00003542	-0.3344832650641436	3.640621096043771	1.9672096021462364	0.16074435870460071	0.26158646375459593	-0.18940331550226405	5.4558616203162265	1.3871288191745057	0.23889057233062577	0.3524114260080427
RLOC_00003543	0.16523691546050664	4.511641686330311	0.7457968002717283	0.38781026028921317	0.5085226220979465	0.063822160596016	6.483720403438327	0.29824150794373494	0.5849869431841922	0.6824197684989816
RLOC_00003547	1.0483278202264226	5.78186747740322	57.50499496865382	3.371220682678348e-14	3.5355719007749545e-13	0.7282851109852719	6.9740060730122	47.53730537139266	5.39671054748799e-12	4.1753916019216217e-11
RLOC_00003554	-0.3610268002094744	2.4572188063058027	1.0791417962102727	0.29888962137307273	0.4184773599859319	-0.29287310798842026	4.141004173648622	1.358436331848957	0.24380866282953306	0.35785644499472496
RLOC_00003560	-0.2299358512149202	3.7387435524599963	0.9998354954936226	0.31735031641185174	0.4368664597025465	-0.08653581970209107	5.518478948058517	0.3043286046977016	0.5811814138251817	0.6792243196495488
RLOC_00003564	-0.24431511157065022	3.3744796039764573	0.8042740679117504	0.3698185578522053	0.49069201470329266	0.12454657476599186	4.466831425906726	0.3090817516536337	0.578244206527531	0.676606035937035
RLOC_00003566	-0.2758105489498511	3.0327937287569884	0.8572716075824589	0.3545033408103517	0.47560077595234146	-0.642582079780563	4.8308600029305335	10.226163822775108	0.001384623449176026	0.0047860700480224574
RLOC_00003575	0.5371765897726931	4.391290950707562	8.198774703238673	0.004191868972590044	0.012958256912323404	0.16106733331499107	5.6638778117172315	1.161177289009688	0.28122151482295976	0.3994243349737899
RLOC_00003576	0.7583170707674173	5.20033309854094	23.49678731242043	1.251225275226918e-06	7.11172871647655e-06	0.4673167106368937	6.45529884918531	15.632778299916126	7.690979434713595e-05	0.00033366774002090095
RLOC_00003578	0.01907058863279509	4.3200178063994965	0.010100208446731429	0.9199475469567239	0.9451565226024357	0.16958137064456627	5.846111502283593	1.4335630364939167	0.2311838281301781	0.34311549498709926
RLOC_00003583	0.5396330290494786	4.4143886952958695	7.852856998621084	0.005074046007938088	0.015275977915495856	0.7211488430185494	6.040307086584171	28.35422577087916	1.010260341855707e-07	5.824669593159291e-07
RLOC_00003593	-1.0208492849790964	3.230609324638886	13.623778981496217	0.000223338687337429	0.0009259911294108727	-0.651337476772759	5.577253916172777	17.4184573070474	2.9989963693909937e-05	0.00013648228384150865
RLOC_00003594	-0.03405498364777893	4.808978655014126	0.042513206301307394	0.8366446009881287	0.8861966523230124	0.34502253217977163	6.417010402824721	8.352560800610302	0.00385144140111162	0.011917560645526348
RLOC_00003598	0.48691998831032435	5.039252829846244	9.205409599543216	0.0024130099984756353	0.007978513059526684	0.3551943218208244	6.457181169170612	9.073433216383801	0.002593496887729929	0.00840145752060368
RLOC_00003599	-0.1686032224804527	4.1414180759008	0.6931190685289139	0.40510549180658884	0.5246814767666279	0.34677516724379154	5.612482550212093	5.212390066398964	0.02242648474051168	0.05402837615663885
RLOC_00003602	-1.4718875010848382	5.25335197157328	94.63584340521756	2.288369641400868e-22	3.9839642612647285e-21	-0.7944880274090067	7.293209777480526	60.994163017623194	5.724428001961943e-15	5.32336311714778e-14
RLOC_00003603	0.01876238483464037	5.8539704924185605	0.020985983387872498	0.8848171469970255	0.9209607782247446	-0.020796154556974464	7.307905101833638	0.04354705567855888	0.8346985904292363	0.8835064523557367
RLOC_00003609	0.21025970850215248	4.797385612623757	1.6038348258574802	0.20536060555550786	0.3153709240962144	0.3532616744871578	6.087205127552768	7.119139171551302	0.007626531676963811	0.021629107530103473
RLOC_00003611	0.2468886675489546	4.459733090607483	1.8646467484952565	0.17208945546083	0.2757739434327268	0.1387455001048586	6.054133380628508	1.0786279805340175	0.2990046889560368	0.41834358067023325
RLOC_00003613	-0.2623306767193406	4.362398979280717	1.9810576761000376	0.1592790271333036	0.2597370683307703	-0.18400295336302633	5.979703452760047	1.8079056301397118	0.17875967359135037	0.28074761601130704
RLOC_00003614	-0.5480077528131918	3.1489645107652433	3.6120821656426916	0.05736126056833329	0.1169051666562537	-0.06277218178264564	4.740020916022813	0.09468149096500689	0.7583078980680503	0.8228914337794792
RLOC_00003615	-0.36758722912725394	4.796573495591502	5.084435894137206	0.024141529167517377	0.057511047633281145	-0.008723260277626536	5.910222968434368	0.003920190137030488	0.9500759340011435	0.9660868988937537
RLOC_00003616	-0.24451490353557379	2.4297490098636545	0.4777976371273973	0.4894215936503285	0.6026918346206626	0.012689463041246695	3.9215080533356637	0.002243655690770563	0.9622205361590611	0.9742342045163852
RLOC_00003618	-0.14876013340232105	4.7196024986183795	0.7485864395082285	0.38692414173078993	0.5074874612556013	-0.26159798743081897	5.9516163671972055	3.584670820277335	0.05831496909502266	0.1170871792940606
RLOC_00003619	-0.2714531949674886	3.556485137934261	1.12738818068995	0.28833313106313085	0.40673491130082606	-0.16784524628762867	5.389619935274733	1.0332430179666758	0.30939819127952295	0.42798044930747187
RLOC_00003620	0.7623661519282143	4.773918351484086	19.99728293874787	7.75522826024733e-06	3.996778904078374e-05	0.6369115389327981	6.236539403656746	25.149733457861394	5.304698501225211e-07	2.857036959967565e-06
RLOC_00003624	0.040387596073231585	5.595581944318763	0.0876213493941389	0.7672231807435057	0.8350760965728691	0.18286644605032948	6.798449398878468	2.8292003349730184	0.09256443984054545	0.17004970321712803
RLOC_00003625	-0.5593666421014664	3.611052568855122	5.381245889119727	0.020354337332588505	0.050030398810000966	-0.11328071218776199	4.988046334702497	0.3611686298955249	0.5478579236855674	0.6500859336318685
RLOC_00003626	0.4655293097370529	4.948043992226794	8.33848559313854	0.003881393819933741	0.012127045333828693	0.3775866314418204	6.345441793584031	9.567811095016935	0.0019801874578610976	0.006599996228597988
RLOC_00003627	0.63961802163159	1.4918559573299868	1.7017626835065125	0.19205761781015962	0.2998989843479184	-0.2590941493973415	3.511759096544579	0.7101224147010781	0.399403176179129	0.5170572067453361
RLOC_00003628	-0.18482264127568682	2.756189182969071	0.317743137587021	0.5729671036467336	0.6762996013136282	-0.07239331001349332	4.4655594965930465	0.10406494536856203	0.7470050198794456	0.8144195161881354
RLOC_00003634	-0.5951150424990996	4.183445176140753	8.95180976048215	0.002771948381253804	0.009009261333251528	-0.16142217545608706	6.1297928785491544	1.524091608417196	0.21700135944295462	0.32701267012940727
RLOC_00003651	-0.46423149158705035	4.06696358724224	4.941345588688567	0.026221615683087233	0.06166543939091617	-0.2937326700098163	5.623072553574231	3.733613442123251	0.053327910166889245	0.10916157707977582
RLOC_00003652	-0.13548028811498763	3.9741389531523	0.3822048439302632	0.5364255969767955	0.6441770666966826	-0.27543446935312593	5.2139343556879725	2.4480618795439266	0.11767007705935256	0.2044717211264718
RLOC_00003653	-0.4019415805824537	3.6312878844948933	2.7886935373548694	0.09493159465179901	0.17413801863613246	-0.1335220109670461	5.118694854209263	0.5431774557559628	0.4611188608172903	0.5743607687413371
RLOC_00003654	-0.40963370434664576	4.085130404890413	3.9297067916969235	0.047440215000258634	0.09978508857397618	-0.22095101069506862	5.487474362289769	1.9302560309264267	0.1647304365480366	0.26340311503469943
RLOC_00003655	0.23137318699943216	4.93340719622104	2.072126471550783	0.1500122318130576	0.24766394212973172	0.13741403848442027	6.2169964012762415	1.1730937280374154	0.2787664734096926	0.39679625872130725
RLOC_00003656	-0.30529260162425004	3.18989693213159	1.2248267226452882	0.26841548149879535	0.38452861964715523	-0.6086174306584414	5.069533100214169	10.6421864456943	0.001105369148170626	0.003908814646899092
RLOC_00003660	0.6130587829019075	4.572431277754	11.94022083881604	0.0005493496766170022	0.0021047711332574047	0.7107053320672859	6.143697301090222	29.40971239694879	5.858330631186484e-08	3.422738636440005e-07
RLOC_00003662	0.1227127819741073	5.152121233797125	0.6580912592750967	0.4172346103319518	0.5364517990526431	0.3813707163228277	6.514306092574518	10.794096779699604	0.0010182428309963886	0.003638710511446931
RLOC_00003663	-0.32186821606304894	3.40994837104492	1.5997254631916826	0.20594212093613135	0.3159404333753481	-0.18226389995327	5.104908823867195	1.0015361570363894	0.31693908811140414	0.4352884843884388
RLOC_00003666	-0.5388073233310308	4.118174475241015	6.723965972754642	0.009512586352683608	0.026383918502106342	-0.36222153770994997	5.464344580765132	5.059835018045022	0.024486568920688154	0.057836779999618664
RLOC_00003669	-0.55958136699374	4.184159884203148	7.605295783365417	0.0058197116502666756	0.017282979605233256	-0.268222732952013	5.9224245627140615	3.7054921800253453	0.05423367437604026	0.11054151568123599
RLOC_00003670	-0.4232751104833239	3.5161529251248766	2.9678083759582607	0.0849368519911779	0.15979696634469276	-0.14267879539177622	5.044579339980051	0.5917446314360268	0.44174527245522	0.5566350954761587
RLOC_00003671	-1.3397294506120367	4.153205190232433	42.429675194452095	7.326986979464795e-11	6.004583084342031e-10	-0.39260394102877105	5.8222005852544205	7.442553670465404	0.006369944234150718	0.018463926090662868
RLOC_00003673	0.41788326011436544	5.403613730701663	8.627033518697395	0.003312104949793553	0.010555700595911571	0.2702623725305682	6.56008277980791	5.552679375007914	0.018452419512011476	0.04590799421750806
RLOC_00003676	-0.009336478546455394	3.39520876387609	0.0012193500784851707	0.9721441757025747	0.9803425398460773	-0.07825359685981285	4.594413279118534	0.13251578123991248	0.7158377198177477	0.790513860876773
RLOC_00003680	-0.5697044085634816	2.6078428892261933	2.8747213652417813	0.08998054791492281	0.16695224319739477	-0.5144122451376915	4.489315880899035	5.225706217967696	0.0222554074207576	0.05369014763569257
RLOC_00003687	-0.014792123229182986	4.195545832462335	0.005567164619174392	0.9405222846754706	0.9596270720695005	0.12969248153135216	5.2991263277538	0.5800460454663536	0.4462942731461951	0.5604166455880758
RLOC_00003689	-0.3030001424917566	4.58349705007014	3.079160325895504	0.07930145710381238	0.15175112954353306	-0.41329040917790016	6.0435482924110735	9.345511855581593	0.002235322129033922	0.007359249618290106
RLOC_00003691	-0.28127307892476405	4.093935041556636	1.7617154709648943	0.18441068694820847	0.29064798007789866	-0.11155994970234193	5.666852027281222	0.5563967992797973	0.4557156809372154	0.5689975768231352
RLOC_00003692	-1.0686888335333118	2.547327097176636	9.797895676212555	0.0017471168051652784	0.005987996154301368	-0.6251594512356312	4.502081974446701	7.7173727029154	0.005469193092194944	0.016200739681712355
RLOC_00003695	-0.023408954481116292	4.215435067254291	0.013841054401185326	0.906346562101495	0.9365264636334745	0.35430319065427407	5.544761841585958	5.202327317370486	0.02255666797939694	0.05425862031813133
RLOC_00003696	-0.24963941121194097	3.3202269341848685	0.888116883051274	0.3459881253588831	0.4671017669775662	-0.522744280160502	5.006076852664688	7.609800264735439	0.005805191384465052	0.017048588628111493
RLOC_00003701	0.5664047380421201	5.344039852708083	14.554284806166972	0.00013617861094720722	0.0005849439679720873	0.6100700330714909	6.701539571169018	29.86311459904762	4.63650023054644e-08	2.728621968638289e-07
RLOC_00003703	-0.7610824274569172	2.5331447387244648	4.989086644694327	0.025507669054490374	0.060324286941662524	-0.03314556578051794	4.024966957641056	0.01634100201499944	0.8982819818334289	0.9291484457376995
RLOC_00003704	-0.5030283507634578	3.5812182179598766	4.401387356568709	0.03590970661068483	0.07949812315456965	0.1681526519519239	4.8973345604997895	0.7559549697579766	0.38459737655814696	0.502537381018542
RLOC_00003706	-0.25630355882297456	7.750387372401904	4.57802099773588	0.03238459586388353	0.07325436056432866	-0.19164465855810617	9.556932187556413	5.004659629513597	0.025279173782939257	0.05922920007745575
RLOC_00003709	0.47526182920516735	5.391145825491327	11.020854032296446	0.0009009255361873086	0.003293146336662384	0.194719355549793	6.692490339938381	3.0627536022356834	0.08010581185284549	0.15189288760032957
RLOC_00003710	-0.44298649632798465	3.396414067968454	3.017886131555454	0.08235074285590595	0.15602203546314755	-0.450118958660532	4.91551902092996	5.366531610522577	0.020526754710155477	0.050181835189061996
RLOC_00003711	0.21604261212650033	4.233361729696874	1.1959923605178373	0.2741241500861384	0.3908931442005271	0.007429012258004344	5.631140166128938	0.002420741273443383	0.9607590910859577	0.9734616577216241
RLOC_00003712	-0.7284293197035174	2.8011403612122177	5.257392580635751	0.021853735573385297	0.05288624159737179	-0.4871808903710287	4.345818165136601	4.257658196877965	0.03907375118191993	0.08470685807536182
RLOC_00003716	-0.33059531815675597	3.6117315076134338	1.918384801833092	0.16603482818507995	0.2682415552919312	-0.46091944367709875	5.347250251800719	7.422268167735337	0.006442155660523288	0.018637694207724993
RLOC_00003717	-0.826313501907988	3.9002862203799538	13.512655000052346	0.00023696005110686243	0.0009760095041820058	-0.20740266429748974	5.888305377959869	2.178262516627116	0.13997240347188758	0.23256373857435475
RLOC_00003723	-0.5729122407525297	4.789117787397378	12.031765419245664	0.0005230151580530474	0.0020156435863586237	-0.41566361793503764	5.329546237843958	5.964237956599327	0.01459890867650829	0.03782673795524692
RLOC_00003729	-0.7147340139556514	3.6676943540665423	9.350230520150001	0.0022295742383378623	0.007425783741773755	-0.45064417179687677	4.964833498616936	5.5522665924249175	0.01845677146319664	0.04590799421750806
RLOC_00003735	1.6412457610669238	7.313844292414468	186.9896011567388	1.4436538025324423e-42	7.772039804607989e-41	1.2435924356236157	8.352387547630126	183.25190774508224	9.449986873259681e-42	2.7948003431648844e-40
RLOC_00003740	-0.6239188050458028	5.423249638240841	19.621203025117666	9.441559622175143e-06	4.795234296738977e-05	-0.4928978313118245	6.968437925698266	21.721487194537055	3.1524047821676027e-06	1.583593196553955e-05
RLOC_00003742	1.4710809023470373	6.3373973725717425	134.4281127381415	4.4038095432119446e-31	1.2328318022570399e-29	1.6097963977838725	7.900054873291333	272.9191951539934	2.6223811630363024e-61	1.5295766572621188e-59
RLOC_00003751	0.9532441536808993	5.136644785317001	34.512761912217705	4.234657691795646e-09	3.013927894811572e-08	0.3606045643341804	6.206648780567641	8.00394856937793	0.004667545672426463	0.014134572256938401
RLOC_00003755	-0.058386898969277984	3.822239192106785	0.06453793127854723	0.7994622084292237	0.8593074114964876	-0.9281765155863225	3.299622789530898	7.476579743563712	0.0062506697105309435	0.01816882095538881
RLOC_00003756	-0.32458746442238623	2.0640546265704325	0.6840395212951029	0.4081991904017456	0.5278082400341823	-0.04908704210698784	2.8178392270798693	0.01602367419722528	0.8992691449062341	0.9296402867635439
RLOC_00003764	-0.8601788019238106	3.5532558264167156	11.680785632116024	0.0006314886232633551	0.0023967344783147873	-0.596318571951093	5.332229012233444	12.148426601430668	0.000491292936894135	0.0018729428265982294
RLOC_00003769	-0.4031695803085923	3.295815750385611	2.2411618031751965	0.13437997898321064	0.22768254024624682	-0.34279055871518865	4.595231169440485	2.515165700387362	0.11275578070173313	0.19760022393381677
RLOC_00003770	0.20667700807939277	4.993025927626693	1.723070203043314	0.1892983216635659	0.2967584381767649	0.09656432904260326	6.364573033594935	0.6352866410749942	0.42542274426735194	0.5417238801774321
RLOC_00003777	-0.3969926261936146	4.533872608914367	4.696800042463897	0.030218830138789978	0.06922044049683988	-0.4181929892435576	6.000741309729892	9.347923630487266	0.002232382426837035	0.007351876756387087
RLOC_00003778	-1.1844681622445075	3.1996175789156243	18.201775993772717	1.986934675869165e-05	9.674786747344385e-05	-0.474574036519555	5.239540774678993	7.312005579608503	0.006849543821049064	0.019669956394199706
RLOC_00003781	-0.7097527885990547	3.3215326329966395	6.800518457933663	0.009113140560972413	0.025423797398110123	-0.48222882827254226	4.58571776991487	4.908100763041238	0.02673101787877255	0.06204929398833363
RLOC_00003783	-0.9476812071380804	4.286718151530138	23.368042576912647	1.3378274020570672e-06	7.5670862428852864e-06	-0.7303219082182664	6.006012151808037	27.90333709940242	1.2752962999847832e-07	7.257092603544845e-07
RLOC_00003789	0.03774722661711522	4.496691851638865	0.04351116754661444	0.8347657362211012	0.8846528062637916	-0.10139213148600709	6.019046959011813	0.5626747548785058	0.4531845462872835	0.5667640918963894
RLOC_00003790	-0.373096190688217	4.3660923471629385	3.890197526369093	0.04856871102668569	0.10187299267895032	-0.39713770763763895	5.64613363752637	6.882451069819734	0.008704611142836187	0.024299311988470386
RLOC_00003793	-0.4821756598682637	4.15253833406886	5.601030071226549	0.017949920855802763	0.04510250577889359	-0.2593062988253937	5.26002256504594	2.2390815928151495	0.1345608817949534	0.22620132473805335
RLOC_00003796	-0.16944085300397552	4.011528247418597	0.6118152998946425	0.434105135235912	0.5524046649601565	-0.3613123688704484	5.447125962007663	4.968960401991906	0.025806153876360687	0.060195247622286355
RLOC_00003798	-0.4567420454908106	3.893207282431835	4.3605183397785465	0.036781112175844066	0.0810852825749708	-0.3031190129290916	5.5782232218928085	3.8601899650694653	0.04944472980781534	0.10255239396528117
RLOC_00003802	1.1782638156518224	5.54707418768693	65.05110543524881	7.298060303647534e-16	8.618114405814601e-15	0.7729077097412508	6.567029858357191	44.68339836009964	2.3161287132218036e-11	1.7356913176385236e-10
RLOC_00003812	1.8386830433441015	7.062263931683749	211.34784891263433	6.979233859712341e-48	4.917315238876521e-46	1.5609147587591234	8.218035107174803	274.06915527880534	1.4725792162969153e-61	8.73480745305159e-60
RLOC_00003819	-0.5792254528908615	4.292333357155408	8.786309757658845	0.003034995769288893	0.009746523580910002	0.33476377241212385	6.050025924594488	6.238309734500974	0.012501573372418575	0.033019878952710094
RLOC_00003822	-0.6595899821921987	3.5521235304173406	7.329331689911874	0.006783827298352384	0.01969486144305955	-0.1784035723414885	4.688240414660956	0.7344483218074132	0.39144510329708654	0.5087623346764188
RLOC_00003825	-0.35439260141095197	3.746746353269889	2.116590224646849	0.14571063053025277	0.24222806006438535	-0.5485756028118542	4.894727395610055	7.819611266327364	0.005168231100050243	0.015437753790747391
RLOC_00003832	-0.36168504808367785	4.086111176229473	2.8858988640052727	0.08935812605194039	0.1662295559743809	-0.2624207749872371	5.038252543460263	1.9860592973971727	0.1587535250681782	0.2555825225734344
RLOC_00003833	-1.1329031878653715	4.987450162465222	51.500907401863216	7.15640147951191e-13	6.774382572760689e-12	-0.40890039931595273	6.319226974906353	10.886414479317747	0.0009687217257565305	0.0034783205877967896
RLOC_00003842	1.3352383334003124	6.249496585407926	112.78237585580138	2.4080683510001412e-26	5.2556967876922005e-25	1.5648699670543553	7.278167749307991	222.22642489688633	2.9563401594694407e-50	1.1801754879950439e-48
RLOC_00003855	-0.7735941337080007	3.3077138687764513	8.644510012864803	0.0032804835166469607	0.010462410505562326	-0.33789946753362177	4.593757487706242	2.4435197732380853	0.11801116093646595	0.20496264328733763
RLOC_00003857	-0.7426072748871744	4.5266892703158845	18.023735359850022	2.1816779856770685e-05	0.00010549634036682573	-0.6533375957819433	6.059126142481095	23.176142948021816	1.478198457808652e-06	7.671579638424637e-06
RLOC_00003859	-1.0187625283938133	3.5361265224203717	17.3340471119808	3.135190361924478e-05	0.00014852539900488796	-0.3514849764769763	5.208725463074589	3.95926295399569	0.04661410919960281	0.09758754386572878
RLOC_00003860	-0.749076057618629	3.557290670762038	9.604748875562505	0.001940748155893726	0.0065828672505888	-0.6818166150058534	5.227578569825341	14.710774919254764	0.00012532807357580727	0.0005280174335764047
RLOC_00003882	-0.741566621076676	3.7205704267230195	10.174556041074538	0.0014239198026756565	0.0049728243807348775	-0.11976481607324845	5.012041153637032	0.40933161168722787	0.5223089479231318	0.6286080773473237
RLOC_00003883	0.8873410212711271	5.108305951253525	30.692741885555147	3.022936964629309e-08	2.003459106987278e-07	0.7955600952396971	6.346919138472127	41.6796067375912	1.0752471516577995e-10	7.705815594030878e-10
RLOC_00003884	-0.24693196654697316	4.549348608015998	2.013026587272221	0.15595392614554782	0.25533442243854665	-0.12423720951965948	5.92169052704661	0.8003888526679326	0.3709771343991631	0.48974244878631923
RLOC_00003885	-0.32968148929748087	3.26283109630817	1.5012710401338056	0.22047589517410016	0.3323000745835576	-0.40396044388809604	4.5092908757999295	3.2906964117609725	0.06967346488529319	0.13518789647582577
RLOC_00003886	-0.2225576065842846	3.3206162898040668	0.7175766998868491	0.396939947704698	0.5169427578469072	-0.9093268305241308	5.362987614457207	28.1296091559022	1.1345673560678719e-07	6.50563772329688e-07
RLOC_00003889	0.6368824913898005	4.882281593866871	14.596673738569127	0.00013314935916806348	0.0005733396113807753	0.4697315877561542	6.28170893324175	14.179818765354272	0.00016614294849518632	0.0006881005192311483
RLOC_00003890	-1.0407125564572062	3.3927787621180348	15.398438402958178	8.706021092195983e-05	0.00038848558886997323	-0.20257584124781425	4.7881800703661215	1.012822489652077	0.31422760612368755	0.43248569447039176
RLOC_00003912	0.49121251794200704	4.870327290457496	9.037167718243277	0.002645451756173985	0.008643620459481636	0.5049597919365959	6.131605347844593	14.883052674540618	0.00011438601745341053	0.00048542392774590025
RLOC_00003918	0.03468806765110774	4.53349648497369	0.03892520331052629	0.8435969173779966	0.8911699622775047	-0.10540109142901043	5.762976363465095	0.5257131854512005	0.46841472232015813	0.5814478800708608
RLOC_00003919	-0.7619213525561166	3.564840286437478	9.942042671209144	0.0016154618763177563	0.00558049318117269	-0.30410977548834306	5.171914794833232	2.9005279782994178	0.08855054422803418	0.16434367400567984
RLOC_00003920	1.1369788415941353	5.794867437641636	70.45767304543806	4.70248562023086e-17	5.962161116084972e-16	1.0363634252014	6.903843674337453	91.25931332704432	1.2602545672399115e-21	1.6444091384152585e-20
RLOC_00003921	1.1820262431233262	5.543212526883954	63.871452915550776	1.3280822784354577e-15	1.540575442985131e-14	1.077702395117465	6.735987455907765	91.25840413819331	1.260833752190002e-21	1.6444091384152585e-20
RLOC_00003935	0.44261086973222974	5.378695685555648	9.548027782040265	0.0020016437052824297	0.006752331496804289	0.4724059374924912	6.74789621437148	18.359367197767813	1.82917459752996e-05	8.55053610840029e-05
RLOC_00003938	-0.24360748240996158	3.3307194278808456	0.8685813438062371	0.35134835222253546	0.47263646868685	-0.05668892439075979	5.097410454646977	0.09672575721896726	0.7557948073736367	0.8208430415450307
RLOC_00003941	-0.3550396561559279	4.02103211641143	2.809234649661772	0.09372307968696848	0.17273611140340506	-0.6004262823765457	5.041046005281389	10.19581040311514	0.0014076008686901246	0.004856523667557548
RLOC_00003949	-1.1701020931612143	2.2986609868250767	9.978764945385347	0.0015835586601844654	0.005482915176324709	-0.7867494097516731	3.4298158728278274	5.955091968642961	0.014674837295690323	0.038003846681900884
RLOC_00003950	0.8569048568883662	6.303494168168146	48.458707005681354	3.3731730821628643e-12	3.047467385244901e-11	1.033830981631028	7.517523860887946	109.71719037490054	1.1301748054668138e-25	1.7896991376464674e-24
RLOC_00003953	-0.5315145779837518	6.690622896456816	21.267376743804917	3.994725090436242e-06	2.137442609551461e-05	-0.26115225503536044	8.317210867440348	8.4168623412275	0.0037175679802189756	0.01156123999535516
RLOC_00003966	-0.18879907644037536	6.799365224368069	2.054335019100897	0.15177350423559938	0.2500499446744071	0.24360966244289367	8.422035719150692	7.459476988784552	0.00631033381809151	0.01831182829080784
RLOC_00003968	-0.7532055058744491	3.462741187502201	8.894132963644807	0.0028608842243463225	0.009255335157839042	-0.18697470327364696	5.026918886186057	1.0037022927809023	0.31641631667606807	0.43476703426018043
RLOC_00003976	-0.4062198126690965	3.5743077817949946	2.799037991689248	0.09432088376929723	0.1735028277221101	-0.5167993333865057	5.407595987447683	9.76204262847713	0.0017815186134643043	0.0060238853213403325
RLOC_00003988	-0.47317372998449153	3.5775842571636143	3.722111042571103	0.053696441684708926	0.11050877177143192	-0.8891155234695726	5.371445707040535	27.130422164307763	1.9018143139218684e-07	1.0717739389085184e-06
RLOC_00003990	0.00035125419421843843	4.143582302122635	2.9723404626480487e-06	0.9986244096416714	0.998814696305094	0.028158818517685168	5.371604680669929	0.028813829957595516	0.8652096056205387	0.9055762784777227
RLOC_00004034	-1.0594753085208108	7.838756836848711	70.01369604333271	5.889412034459038e-17	7.404436830868381e-16	-0.5189101120549714	9.232340083500366	35.83766193002604	2.1446185574223486e-09	1.4090331811249836e-08
RLOC_00004040	-0.25190449622079497	3.9517895232664686	1.3313190792186593	0.24857068775697252	0.36394631521237064	-0.6081135399571991	5.417162189672515	13.525657300988804	0.00023532395459173493	0.0009487965434940956
RLOC_00004048	-0.6121445350254351	3.9297961759522853	7.976708231765764	0.004738302251167614	0.01441817305297322	-0.4554742435814595	5.695267911374545	9.276427053008033	0.002321217702607978	0.00760626237817764
RLOC_00004072	-0.8400349923231737	3.6595863501599712	11.408467829604252	0.0007311010204867416	0.0027411066118106474	-0.04519455213862744	5.504159329389928	0.08226994854030067	0.7742444936838735	0.8348354666927172
RLOC_00004088	-0.7546184978931155	3.5274269180689797	9.35481506846283	0.002224004076290481	0.007411934854888084	-0.8055789462772828	5.361593190736399	22.278317809103818	2.358547383425931e-06	1.2020577174072257e-05
RLOC_00004090	-0.20608252845013475	2.4408714416518906	0.3485941843880034	0.5549100089606283	0.6610437158154299	-0.609445344173974	3.4023848721514036	3.5694803083897977	0.058850726522106704	0.11795986593272208
RLOC_00004094	-0.7763239758028122	4.200306790516091	15.191581576369277	9.713549201956139e-05	0.0004300836757576362	-0.2417109654851243	5.396373130251088	2.14848186906863	0.14271094021102046	0.23581684904774988
RLOC_00004098	1.0015124174834644	5.53160396365818	49.33727471663442	2.1552802766253286e-12	1.969359695574018e-11	1.2325905051795223	7.008490668125116	132.14238248961374	1.3926392617734111e-30	2.673001756738399e-29
RLOC_00004103	-0.1930572627102956	5.012958724668081	1.4273566081370603	0.23219632630718162	0.34531761348247525	-0.1897317707550987	6.186950140564557	2.1831706132195436	0.13952676030889888	0.23204363321449853
RLOC_00004105	-0.5688677601558616	4.033710974691367	7.039136914886754	0.007974745242421612	0.022706502727133735	-0.7821522964003726	5.625026412263	25.550828612662414	4.308809726235464e-07	2.3342721009156933e-06
RLOC_00004114	-0.2156282799541527	3.952570103465636	0.9882657787431071	0.3201666030052118	0.43953301926882615	-0.8124761314001655	4.818551052899803	15.953893055544427	6.490415843532903e-05	0.0002842840047611679
RLOC_00004116	0.005782346489758761	4.753512540026641	0.0012085971999802325	0.9722672217396692	0.9803425398460773	0.11149790141857714	6.202334316328886	0.7652812781328131	0.38168079688994405	0.4998461627226547
RLOC_00004120	-0.46405032470524593	3.148728771692111	2.716824181554667	0.09929539967297557	0.17948168588879937	-0.8019631691978808	4.92852520758316	16.679752227198755	4.425078690580522e-05	0.00019744539384787465
RLOC_00004124	-0.2881053985599861	4.307600834228901	2.275114547643496	0.1314654114540219	0.2236829642535368	-0.1757790543654315	5.60827343209199	1.3299063265536568	0.24882188306847355	0.36353756614749566
RLOC_00004135	-0.30389912633993077	3.6331210617822776	1.5752128832342693	0.20945158877426645	0.32020136580053143	-0.513995957475028	5.094471654870803	7.7679807917615795	0.0053180463799956355	0.015812565546183568
RLOC_00004140	-0.9725749838294477	4.223213537700073	24.55210454503687	7.23273033838179e-07	4.194983596261438e-06	-0.2119945536453889	5.549301328701178	1.8617646357028086	0.17242127409608127	0.2726692207764358
RLOC_00004149	-1.0349479331523075	4.621166867998169	35.65965513171538	2.34980369705499e-09	1.7118833595894024e-08	-0.7870601468308908	6.179027590574577	35.96710900532234	2.0067653392875423e-09	1.322600709176391e-08
RLOC_00004181	-0.22465229240745205	5.1285910325473365	2.219803899699672	0.13625036480696578	0.2299978018561709	-0.3186211201162083	6.317361465945925	6.644805712885518	0.009944532208530086	0.027154133590990216
RLOC_00004183	0.46697602162210594	5.802800189265394	12.803446888006105	0.0003459813166443688	0.0013841889718493078	1.2891604878975216	7.296344352975981	156.67599361664998	6.024903089821369e-36	1.4214709559558326e-34
RLOC_00004200	1.58412864998767	8.115776351461179	151.11854347557335	9.873669904076706e-35	3.3873786487907605e-33	2.034278523827522	9.213768483611425	495.06902700665904	1.1242451799949478e-109	3.576803074171805e-107
RLOC_00004216	-0.05111204498894171	5.358388258564784	0.1258395557321892	0.7227853445520901	0.80217787790547	0.0754195192719908	6.809938009757621	0.4838672555670662	0.48667581099897617	0.5975452391156884
RLOC_00004221	-0.3705070021422411	4.552751387570506	4.250421167614964	0.03924059765623091	0.08544861941404525	-0.03243762434616434	5.823644065456275	0.051705862965351734	0.8201210923935901	0.8717678798258887
RLOC_00004222	0.6206609119000063	5.390701688475894	15.054780369928523	0.00010443541640548422	0.00045873598000037793	0.5327492970578582	6.736097959017852	23.20648034548984	1.455061783181688e-06	7.558977566365434e-06
RLOC_00004228	-0.32045140162372454	5.154593051128508	4.568852417534174	0.03255836884673362	0.07350347971123525	-0.3341033208798139	6.19609443890319	6.773083422233716	0.009254281359776592	0.025602899545699533
RLOC_00004229	-0.9928321321905893	4.859176753460672	30.680408041427345	3.042213543522994e-08	2.014962635956113e-07	-0.5120068344459968	6.129474053547617	15.06395034421095	0.00010392927059462342	0.00044247908028100213
RLOC_00004230	-1.003995069091433	4.845300211617146	31.069634007312843	2.4893546808470524e-08	1.6571493620502446e-07	-0.5022960269016911	6.101573960243187	14.247452792278485	0.00016027758623851643	0.0006656465102524463
RLOC_00004279	-0.857171089359898	5.168252971053547	24.381133719568496	7.903896349425148e-07	4.559071641553033e-06	-0.5018458778271317	6.133989649695086	14.535356923149452	0.00013755357728650972	0.00057643573438564
RLOC_00004311	-0.7662969231924252	4.73178446528657	18.607570519580438	1.6058158815734148e-05	7.899650948808673e-05	-0.251038521049567	6.336442989861089	4.186512839238214	0.04074683037219859	0.08762822041739307
RLOC_00004312	0.38461710238223124	6.118173114981203	9.58841884009954	0.0019580849444390696	0.0066309599182972105	1.083345097742344	6.936535818360272	100.65806017506414	1.0931592481602757e-23	1.5615073396509843e-22
RLOC_00004342	-0.6078821261083214	6.172915448998889	25.647948145843856	4.0973091771258404e-07	2.437028427278588e-06	-0.5174736399165577	5.836452608111299	12.963010989852513	0.0003177058088094631	0.0012558709663744551
RLOC_00004367	-0.6416863861609976	4.645696496483208	13.927116132712356	0.000190037052354036	0.0007967288241264658	-0.35915655772311017	5.572367472951698	5.383034416795301	0.020333482276320206	0.049867140952834815
RLOC_00004514	-1.0008124714256053	5.5903827109751765	52.66676743210672	3.952222890728164e-13	3.831065180689221e-12	-0.6723397249091534	6.698959135354033	35.45821432265454	2.605811322081888e-09	1.6992803149402327e-08
RLOC_00004521	-0.7663629278881777	4.616707399615795	18.26657346227364	1.9204769363867517e-05	9.359873202501449e-05	-0.35541429790506907	5.987713543150975	6.725121732094973	0.009506424235872162	0.026167815764145713
RLOC_00004576	0.2863499950495133	5.733027320779474	4.600742147660361	0.03195811904595364	0.07247706496963087	0.32202408194456206	6.60394615046682	8.04044702294006	0.004574424692229551	0.013908741628646991
RLOC_00004577	0.8074065096486617	6.474655425459551	46.58161391629861	8.788095425665705e-12	7.681717383733437e-11	1.4096131839918913	7.581626288005508	199.83683053217092	2.2669356824220027e-45	7.6283838877399385e-44
RLOC_00004581	0.3172333238624355	5.423266625143328	5.068249676398732	0.024367976877973114	0.057994790583759184	0.8431084509018381	6.451017564180414	49.69110909189235	1.7995958265636946e-12	1.4400881541991029e-11
RLOC_00004592	-0.46139030393498315	6.426333762519202	15.892110626144689	6.705766548828295e-05	0.0003039600053091513	-0.15708455621277762	7.127941625401689	2.353927545975905	0.12496780191017938	0.21396558255951945
RLOC_00004628	-0.7259393265248522	5.56579005867539	28.83948883901399	7.863147095870563e-08	5.027242278468281e-07	-0.8354098914289002	6.519419656026844	49.7308959616057	1.7634694843766008e-12	1.4133332913335824e-11
RLOC_00004631	-0.6303992733625732	4.545372948712885	13.216101111335908	0.0002775543898828496	0.0011315596058214194	-0.6313142970183493	4.932649587880678	10.53313495686007	0.0011725314771892942	0.004122708633292164
RLOC_00004646	-0.6012690022298256	4.946220535654418	13.65936129704657	0.00021914602937344693	0.0009096856529705202	0.1888878662320025	6.380864627672416	2.4558371157452745	0.11708873136369109	0.20359632172696138
RLOC_00004652	-0.6911306579351226	4.650589386653788	16.64163982139776	4.51488629593913e-05	0.0002087985741619779	-0.5079884959157169	5.482935058529401	10.003646679703499	0.001562305553060193	0.005348107597515151
RLOC_00004655	-0.5313549964659144	5.132953662206372	12.269991241617586	0.00046030043125503734	0.0017995975625047932	-0.2255419275516497	6.487224536083728	3.7042025160780403	0.05427560237147169	0.11060550258114932
RLOC_00004677	-0.2796709114546611	4.676059676013965	2.5146281751906514	0.11279423508656909	0.19817251953721365	-0.45397075729519265	6.359578424839945	13.739465007482487	0.00020999530070498013	0.0008548819938354349
RLOC_00004682	-0.4852569286367396	4.688934772232611	7.970471613748167	0.004754654950017214	0.014451177668002522	0.0021025388566941346	5.8448197645304	0.000219686693849086	0.9881743223454549	0.9917639050095527
RLOC_00004689	1.4427937399187964	6.509451755006029	128.02562357651146	1.1080318811692175e-29	2.879237299137239e-28	1.6398242772242426	7.976147160088867	286.75660691798134	2.5309047718934172e-64	1.6402450123524066e-62
RLOC_00004698	-0.6609548467028746	4.583390804720015	14.820472572131262	0.00011824487194101581	0.0005135848844173703	-0.3737662840902803	5.98096907478259	7.408182064236426	0.006492789899216216	0.018763501555703565
RLOC_00004703	0.6138920942089895	6.114288632632815	21.052879438478847	4.467809364387235e-06	2.3772459557697515e-05	0.9166055119667826	7.310246159396926	82.2500352211062	1.1991547847189307e-19	1.4114266911170463e-18
RLOC_00004704	-0.5719604177417974	4.274723061450913	8.67036851498112	0.0032342578164453392	0.010335841265462152	-0.4486358178081016	5.561276388472829	8.30744984678493	0.00394827890302409	0.012184885421178696
RLOC_00004705	-0.37508283903159706	4.472105722438711	4.0715257528481175	0.043611864793430544	0.0930374632394704	-0.6495429289033444	6.006869215957495	22.253455520279356	2.389284164510923e-06	1.2159522270092186e-05
RLOC_00004728	-0.9237901573555509	2.7140746783900798	8.181636976984098	0.004231655585664899	0.01306318638300178	-0.25404953488358967	4.619653113822621	1.4112095382412289	0.23485570677211548	0.3475824732732507
RLOC_00004738	1.200108068069433	6.544677372152913	94.37093965956495	2.6160481608791837e-22	4.531893332163312e-21	0.9163575116206782	7.629502599214819	89.254668582356	3.47122752212089e-21	4.43362746408117e-20
RLOC_00004739	-0.0937452870273893	5.627158764479234	0.4646347538950435	0.49546584331446264	0.6084932642858246	0.0004147394583177324	7.086504487847809	1.6292974871490173e-05	0.9967793830371321	0.9974012558876288
RLOC_00004745	-0.09301967802311684	3.9443567029600923	0.18332794121017582	0.668528722865349	0.7585618820406868	0.11699322386373683	5.401471362346317	0.5096261412242951	0.47530074147888746	0.5882595162181087
RLOC_00004748	0.13274796010794518	4.3516146602838806	0.4960850724097985	0.48122537683210137	0.5953923401276842	-0.07921407336552556	5.803021476017821	0.30379543552245836	0.581512749221227	0.6794019890898032
RLOC_00004760	-0.48403274666656515	3.9052331613961737	4.9090652991948405	0.026716094565696943	0.06264587016990988	-0.5679306888654619	5.325865769767473	10.985167533481274	0.0009184397947045942	0.003313642407080252
RLOC_00004774	-0.8195008510896967	4.406135237860512	19.142278571687104	1.2132732266985274e-05	6.079686078224888e-05	-0.4459598619101885	5.717103812009681	9.019005180967483	0.002671867725046881	0.008620755760684452
RLOC_00004793	-0.6866735798312869	4.826924241351757	17.172380580423997	3.41363606911794e-05	0.00016091760868253315	-0.42838813103478657	5.850327692735624	8.987512730613112	0.002718307430438222	0.008759824957695178
RLOC_00004796	0.06972885599446005	4.677807128316163	0.1647157835355415	0.6848514048387815	0.7718573241584097	0.00948516054696404	6.085733136188026	0.005139184708904843	0.9428501209177532	0.9603726558028041
RLOC_00004801	-0.9535965503733568	4.742026413719808	30.98303379735657	2.60293869046097e-08	1.7305668380278188e-07	-1.2515263708499729	6.682487464893614	114.50871014274635	1.008224144870532e-26	1.661749654159453e-25
RLOC_00004806	-0.5261808338982583	4.142747088232645	6.433772444978409	0.011197051264615869	0.03028676112786204	-0.05840336263417281	5.531974951237353	0.14008961772914796	0.7081919364036393	0.785000890303407
RLOC_00004807	-0.5111605698246229	3.5802901502299007	4.1242455765562696	0.04227286506981136	0.09084555527182796	-0.32602985743699414	5.018606121595051	3.0222373531885687	0.08213008700096665	0.15494766997720555
RLOC_00004808	-0.14413883007770165	3.583563605754262	0.34853830497057237	0.5549417286608291	0.6610437158154299	0.12139689589819604	5.016827687521243	0.42366586337049084	0.5151134945138041	0.6221751415405923
RLOC_00004810	-0.9069541490289895	3.468133976072708	12.594578985248736	0.0003868671879291351	0.0015311763970223436	-0.13762974283578483	4.651769673177216	0.425466460198634	0.514221913493039	0.6216253160349356
RLOC_00004811	-0.985518844475544	3.95555314694781	20.649373253155655	5.515523860410171e-06	2.9052669085090805e-05	-0.5740221614402115	5.652129570766306	14.235504595674481	0.00016129837957021333	0.0006693563980662726
RLOC_00004812	-0.6292462017551066	3.097908073478837	4.919814332738722	0.026550370252824144	0.062271176701105414	-0.32824327916527213	4.543281122468098	2.2314553438652123	0.13522642227240056	0.22683211494454922
RLOC_00004813	-0.005192443456154345	4.231047754839838	0.0006480329460334389	0.9796908521939865	0.9853647822556454	-0.22133575457633248	5.764155924485618	2.3087860541612164	0.1286444843379907	0.21854990955737288
RLOC_00004815	0.09879813613426304	5.196180163074147	0.4132155718953605	0.5203419037608127	0.6307065356980732	0.07625455641419979	7.29382296880452	0.5836350295292743	0.44489102229175764	0.5592076862841171
RLOC_00004826	-0.7994873014482626	3.596813000867873	10.780043639203376	0.0010260026260197248	0.0037056501967156633	-0.43617751304831637	5.166770423199275	5.892997995850552	0.015201200034734366	0.03915492589090874
RLOC_00004832	0.8614031454144039	4.772815641881853	22.812067512775535	1.7864048845814224e-06	9.970057670566598e-06	0.6549796589296241	6.20451001040039	26.071206462567552	3.290547227146459e-07	1.8068752791741983e-06
RLOC_00004836	-0.1314729616866967	4.381101339383219	0.5040694160619661	0.4777174926319205	0.5926587376093005	-0.4067429790952826	5.89265073598617	8.317368265413684	0.003926777196675603	0.012122091675359353
RLOC_00004844	-0.1013924209971689	4.418684662019917	0.2832009611377595	0.5946108276240332	0.6963659603298862	-0.27490975811628615	6.365562909440668	5.10684762451428	0.023831583986325552	0.056505826619790415
RLOC_00004852	0.9833510106435412	5.657199125636878	48.4003652535999	3.475034632353292e-12	3.126042293954144e-11	0.8770395433010988	7.0179350232036946	69.32535210067051	8.348948906478512e-17	8.66162199299584e-16
RLOC_00004854	-0.2937276015039281	3.492470338049123	1.3120033195537468	0.25203226356210234	0.36722202676959753	-0.6263009334942267	5.436397347273209	14.534870456742224	0.00013758909899708676	0.00057643573438564
RLOC_00004856	1.4774655151007987	6.926169209556485	129.34353322259315	5.7040220549622814e-30	1.5121420084089401e-28	1.522159215802535	8.26900843211131	263.8619297484901	2.470193941228651e-59	1.3578306905214454e-57
RLOC_00004861	-0.5073439462788979	3.5670228169743616	4.22816586382406	0.0397583828537058	0.08639691641444909	-0.48080219561489695	5.118520882660756	6.918194005543627	0.008532310297385874	0.02388819354993448
RLOC_00004865	-0.5295950743997616	4.562085449750343	9.107246116812425	0.002545988886849319	0.008353434490601403	-0.7280280968147628	6.294371973269694	33.23992797318003	8.146058988594532e-09	5.054697004802245e-08
RLOC_00004885	-0.3920298057885507	3.689900198885414	2.7900921489857113	0.09484877308941597	0.17407734613508546	0.0542863902974663	4.983384129014143	0.08300809247184926	0.773261581205462	0.8341253370707318
RLOC_00004886	0.5570943512702327	5.540824103865061	15.807478622089853	7.012478413821333e-05	0.0003170413367282358	0.8323125250904373	6.921472227763412	60.269393857637276	8.272373529540811e-15	7.58529691586454e-14
RLOC_00004888	-0.1835350934719239	4.74448103601924	1.2411141117906308	0.2652564453091349	0.38109513656155714	-0.2356743965558504	5.9927960804177705	2.982406680843824	0.08417402384368586	0.15789585069409645
RLOC_00004892	-0.2929782264251177	3.397820112759564	1.2998761519325117	0.2542358471147759	0.36961195443995537	-0.4214117823573523	4.862258438114721	4.565919186842043	0.032614167956986684	0.07308775867244464
RLOC_00004896	-0.4403898594674465	3.2851483397456565	2.732211843341409	0.09834300144800197	0.1785240928931566	-0.6271709669115161	4.83585292252262	9.789014653933688	0.0017555751176941256	0.005945736503442137
RLOC_00004906	-0.8914204551550369	2.8069088212270454	8.121846243836899	0.004373499730333315	0.013440573819976329	-0.5266546198246541	4.562633705783478	5.742474739115591	0.016559444887580193	0.04207589832398462
RLOC_00004909	-0.6058649720333573	3.7014651103211027	6.863241927534106	0.008798677066323897	0.024671076880947725	-0.5180894051730965	5.577879550572393	11.143375843175868	0.0008433227767978706	0.00306633910334804
RLOC_00004913	0.4129689365105956	3.9034075174055256	3.157488626474133	0.07557936871196398	0.14587832556319136	-0.07544461521187434	5.2733940431211135	0.19233772552442652	0.6609780294807522	0.7457934800127263
RLOC_00004915	-0.5594356887048673	4.353989859750674	9.10070606415232	0.002555108422177853	0.008377116869463803	-0.34197233897331186	5.4439961503289425	4.451548651975841	0.03486961139396243	0.07713781079334418
RLOC_00004917	-0.25045778880528813	1.8401028238242219	0.35367211622242734	0.5520417587067459	0.658485897387049	-0.3165047676561572	3.68590803425544	1.182516724125029	0.27684423551158815	0.39474571511153617
RLOC_00004919	-0.4524947673792852	2.907585293796235	2.2033454347842554	0.1377115805299993	0.23179351810228196	-1.0369548997249138	4.229009947734799	16.910032474149396	3.919388430219749e-05	0.0001755531532801926
RLOC_00004922	0.06733652032057617	4.019544939030327	0.1002420712428077	0.7515393322801318	0.8233834178957237	0.19403537599755158	5.665388648771281	1.6879457906509918	0.1938719806492376	0.29955289548732095
RLOC_00004928	-0.014991718553264682	3.9008535740213004	0.004596445711518626	0.9459471585221984	0.9634765955337187	-0.28063775881902003	5.514076617805794	3.1629060422396797	0.07532897855261413	0.14437366663451912
RLOC_00004929	0.289583985859407	4.877515011142971	3.18912781857862	0.07412955257451057	0.14379379950613672	0.1058125401503048	6.382850373529301	0.7700263816609993	0.38020889107101136	0.4985404205513361
RLOC_00004931	-0.7381874822827382	3.778263947677653	9.957642330926365	0.0016018305662647715	0.00554252382486736	-0.29499714913010383	5.1774272704674	2.738603795068297	0.09795031434000327	0.17788969905824156
RLOC_00004933	-0.8848456054410645	2.9354378721766308	8.277500939899209	0.00401393363105151	0.012492818042922842	-0.7271624257259972	4.809641064665925	12.804677467161378	0.00034575381791984055	0.001354503482962838
RLOC_00004937	-1.297493056174248	5.9919923775291775	93.14590389063487	4.857788505707534e-22	8.332853551130342e-21	-1.0023095965978954	7.512388421069161	101.38036648394612	7.591249779911253e-24	1.0928016620968325e-22
RLOC_00004942	0.6051099382573067	4.721197470848632	12.73081313567545	0.0003596801282637879	0.0014324438492083632	0.8733439217856409	6.091354936044907	42.554327420957776	6.87460074394722e-11	4.977685049013922e-10
RLOC_00004950	-0.748731958934973	2.2261824359765408	3.95319840412758	0.04678237022841597	0.09873770057456994	-0.7636211494560737	3.890164602189549	7.596253539287832	0.005848971399691054	0.017148380543243892
RLOC_00004958	-0.3780082595487508	3.3509710978863216	2.02938266736075	0.15428326473734952	0.25331024604515096	-0.2674367828763518	4.941441665026464	1.943965087689696	0.16323865706233065	0.26133617878887
RLOC_00004969	-0.726387450355993	4.11956476569253	12.5174565457271	0.00040316735117070716	0.0015917453375667858	-0.2228734626799457	5.504231747549418	1.9885423065898689	0.1584933774940915	0.25529640538669324
RLOC_00004972	-0.5980426584482195	4.029905957576682	8.06421952413542	0.004514791860969826	0.013830255312652825	-0.21008920171467924	5.395843527958414	1.6249466065752558	0.2024034310601039	0.30963625567536507
RLOC_00004975	0.5275502604070089	4.931745537223081	10.381585536424925	0.001272783467302982	0.004497368172247293	0.794792055701764	6.425076544477227	43.566010169655904	4.0989696593830245e-11	3.0115523060785426e-10
RLOC_00004976	-0.39950997392550774	4.094542305346153	3.434505400633835	0.06384769994259964	0.1273137608956794	-0.14735051911304087	5.500468654913635	0.8681237664338437	0.35147525356253606	0.4709212209230559
RLOC_00004978	1.267953879132452	6.478337831891201	98.03536810970294	4.109761837643744e-23	7.464408264979935e-22	1.1412206639545925	7.8582583541750255	142.69437964634102	6.855731888297683e-33	1.4541076584896438e-31
RLOC_00004984	0.5784041898019805	4.05824886917351	7.221740630331201	0.007202583136487106	0.02074858641535897	0.10856747422090562	5.278964414971252	0.4006203773490027	0.526769042016986	0.6323517233176693
RLOC_00004996	0.19498022832838569	3.9433289363446757	0.7904712485885628	0.3739576683165687	0.4944342067994128	-0.23073969661958346	5.912162002476283	2.73161135131945	0.09837998059800708	0.17848477903896257
RLOC_00005001	-0.6866024052708534	4.50622276752735	13.450186850734045	0.0002449817817828925	0.0010065826791220375	-0.5740588108350795	6.430962467608299	22.751842478704017	1.8432732700069237e-06	9.495842032287876e-06
RLOC_00005007	0.26598981453873227	4.233415037536619	1.777127194315808	0.1825024864752248	0.2880636149476635	0.3257742449707611	6.074145348332231	6.004843027618644	0.014266663216304954	0.037075667600986566
RLOC_00005008	-0.5788877342269673	3.1322451375395564	4.222821278792788	0.03988379259605406	0.08663357224774997	-0.3150306815839446	5.150486577068518	3.0670475122779006	0.0798944530803014	0.1516016379703749
RLOC_00005010	-0.4374458249684611	4.607495303970301	5.349366219465672	0.02072980453966837	0.05073944697072477	-0.05625942004093441	6.231715630539574	0.19824456949573221	0.6561415255628718	0.7418511605518621
RLOC_00005011	-0.9264369937799178	2.6350497578582877	6.5459625245046364	0.010512244044373764	0.0287015703453409	-0.16248647540310263	3.9689646821534033	0.3773383878855332	0.539031139473468	0.6424438566615894
RLOC_00005029	-1.5955713562823406	2.3316431034910874	18.163816096735317	2.0269354189182593e-05	9.864982859436201e-05	-0.24687071303680674	4.723947446686238	1.4373581078147057	0.2305673348859657	0.34244255891466313
RLOC_00005030	-0.6007349653772035	3.2677556786440594	4.656932733389173	0.030928395042349094	0.07056863533027186	-0.07806249447178212	5.300429067680395	0.20948972414675437	0.6471676472334281	0.7340856848781281
RLOC_00005037	1.6528817641913378	6.282820528170135	162.15312021979327	3.8303329755487665e-37	1.462212202811307e-35	1.8461269792174806	7.816587754781197	342.07359212339617	2.255709191666596e-76	2.4166011023783257e-74
RLOC_00005044	-1.25412187609668	9.866765732980369	68.38190349837396	1.3470811680960818e-16	1.6559318621396566e-15	-0.35472355228156444	10.998666071800143	17.38979348141073	3.0445648436517155e-05	0.00013831625397446717
RLOC_00005045	-0.22412767405804623	3.28960335905085	0.6972878902638291	0.4036965057441855	0.5234044605782956	-0.6573857979592342	4.909037519722169	11.225919858815367	0.0008066278392060268	0.0029487415333649286
RLOC_00005052	0.1033146730648702	5.2229380820272935	0.4900683718757337	0.4838968069068111	0.5979223962932796	0.05578229766937804	6.6720989067065	0.24911973804639098	0.6176955800240832	0.7101605228507282
RLOC_00005062	0.8335678061855801	4.833398073557113	24.682789476439805	6.758502227130121e-07	3.928613310100333e-06	0.8253762976502608	6.389453959202578	45.94081488537311	1.2188003224998614e-11	9.259178426863998e-11
RLOC_00005064	-0.4502981094139656	3.0053303407511196	2.2921864194836434	0.1300266419635072	0.22187205508086963	-0.07159520237500366	4.7081582200784675	0.12024416746803457	0.728769821000632	0.8004974370151386
RLOC_00005065	0.9730438900241581	4.086948477934209	18.913568927526665	1.3677634990202668e-05	6.808336279144031e-05	0.5984845084218703	5.5152414565052945	14.41102545217339	0.00014693947999722207	0.0006136505968539517
RLOC_00005068	0.36794458050282003	4.281846927841994	3.566749369934141	0.058947598091320774	0.1193273977560134	0.43605102856602906	5.794590247924697	9.147952316043561	0.0024899655773480468	0.008106092588085935
RLOC_00005069	-0.41567418480068546	4.387462416912215	5.088668929316055	0.024082669272683814	0.05739383927914522	0.20797031272386332	5.865161910557523	2.172607255722504	0.1404878698619799	0.23307923244636874
RLOC_00005072	-0.4093886272118119	3.700140564842854	3.0386884366076723	0.08130158061384378	0.15450832608329687	-0.01952632892766991	5.105378112089478	0.011553668305872122	0.914401851563346	0.9411141103385521
RLOC_00005074	0.8256056139187513	4.923049368093834	23.711015943418037	1.1193996400797875e-06	6.386661642150875e-06	0.6817022434939289	6.492160496102679	33.67535951511017	6.512035950452136e-09	4.076915053297375e-08
RLOC_00005076	0.14806966307224884	4.311461412286523	0.5606183834453029	0.45401119375374904	0.5701889594481226	0.20036608435298864	5.9415475819170664	2.109913968194075	0.14634754495974406	0.24019116375368965
RLOC_00005077	0.608772425361036	4.2599637627058575	8.93149932853127	0.002802941624287532	0.00910717461212334	0.20957080852441198	5.833298218789656	2.169964959838679	0.14072944057454256	0.23323100182985357
RLOC_00005086	-0.20275578355444668	3.5759029270499503	0.7079887122441781	0.400112320339472	0.519870983973207	-0.41131710356466733	4.763064114589373	4.064261616944103	0.04379983011791511	0.09288111824035361
RLOC_00005089	-0.4755170889940113	3.0075895563050623	2.472736322813544	0.11583610746948911	0.20227003596385507	-0.5288972106714166	4.149218611425154	4.388747047356027	0.03617688999777428	0.07956036197876667
RLOC_00005093	-0.1276676995128087	3.07332619810822	0.196352716558019	0.6576810761461017	0.7497378583322593	-0.4752483525540914	4.359034144227501	4.09182448652976	0.0430911038360256	0.09164062614397524
RLOC_00005100	0.9062230503668118	6.0814203092657575	50.084968423493265	1.4723052333121456e-12	1.3629859205741538e-11	1.2155519068041307	7.470278303511409	147.44255796971729	6.2803927471891e-34	1.3852488120323187e-32
RLOC_00005101	0.41978446782659107	4.52623781071975	5.348489470168181	0.02074023124749941	0.050753134647144246	0.6007901691974609	6.084475913906755	20.37502794128415	6.365505946276196e-06	3.104108078492977e-05
RLOC_00005103	1.254645041114796	5.693558003944598	81.91933129627775	1.417559882709439e-19	2.0784278838943702e-18	1.4629549540149214	7.095018438478432	186.1419761473785	2.210541921348084e-42	6.688322660586033e-41
RLOC_00005104	-0.1357685478950174	3.379822333708496	0.26014514774934305	0.6100204539024504	0.7102134551478235	-0.5438684568583986	4.6054181615073935	6.292865892977758	0.012122488352903362	0.03213178621992739
RLOC_00005105	-0.6171607185096638	3.642867798894635	6.717263290955743	0.009548403543776297	0.02646228627311604	-0.28042831696783493	5.004814828148612	2.2225525064004787	0.1360080341651582	0.22777928707927833
RLOC_00005106	-0.8169232326879833	4.023963920450198	14.856598201845678	0.00011600155965598292	0.0005046764912012055	-0.13716667282029793	5.465240947786844	0.7333030740218762	0.3918146243999845	0.5091795694486244
RLOC_00005108	-0.2982443613988835	4.154296092145557	2.173927206607299	0.1403673684020863	0.23539562835225272	-0.4513471560452026	5.447902171247942	7.713593469142111	0.005480654460827142	0.016213409744779982
RLOC_00005109	1.6757903637656035	6.5955800135483	181.44404223463374	2.3449528669373e-41	1.18352476909172e-39	1.6313971725166663	7.877344404018878	278.3720753250699	1.6996236271394319e-62	1.0314652289790112e-60
RLOC_00005112	1.2596599308755492	5.058188120400211	58.62156843906904	1.9110991750045735e-14	2.0347585333872222e-13	1.3684769228832214	6.415968131545479	121.79442932731634	2.5603931018455147e-28	4.428594262977934e-27
RLOC_00005114	0.7358022916903517	5.75048629312862	30.304673097733914	3.692352518319362e-08	2.427195788185138e-07	0.6320121360703541	6.958228997108646	35.730730891867125	2.26561801755728e-09	1.4866702228958676e-08
RLOC_00005117	1.3210071750701324	5.559794008863324	82.64970894183837	9.79622363601429e-20	1.4628841497991183e-18	1.3360098233775661	6.809673655673904	141.12951896336654	1.5073735552698204e-32	3.1400624914241756e-31
RLOC_00005123	0.5706007864658036	5.188856344997473	13.548481842612135	0.00023247939369691904	0.000960097826526458	0.2840947394215403	6.494019789862606	5.935055169135801	0.014842604110968292	0.03834461135852758
RLOC_00005125	-0.5960445218192643	3.8320993255232305	6.991319483055097	0.008190595160018561	0.023214057232687595	-0.10061771215548906	5.423983024657941	0.38260210117099636	0.5362139153648527	0.640095698191854
RLOC_00005126	-0.038478597312057425	4.12836138771637	0.03538217562650203	0.8507970824975486	0.8963937948674493	-0.42315718536484387	5.388950482154785	6.492014918039553	0.01083600900972314	0.029156140080236606
RLOC_00005128	-0.6611523535511533	3.38535509098663	6.51336010827744	0.010706700876362621	0.02914154674618999	-0.017223574980434805	4.8649847539819	0.007768869748954188	0.9297644571824998	0.9512372866847657
RLOC_00005129	-0.34105742172942116	4.8789105115695115	4.543411022155771	0.0330456796751169	0.07438112033219924	-0.03133216380652537	6.704380074833331	0.07959462569558884	0.7778475147252941	0.8376702802324993
RLOC_00005130	1.1055849629657393	6.420822710376985	84.07024329034068	4.77503957748798e-20	7.243983451512835e-19	1.2969038019648875	7.532553155052179	168.9957131760317	1.226073384441527e-38	3.2101108387161076e-37
RLOC_00005142	-0.7349041394818306	2.3374050140308547	3.935713330576318	0.04727108855051382	0.09954902459444213	0.39368654712287227	3.6388833235609725	1.7931854307899875	0.18053853119897123	0.28294880415853096
RLOC_00005144	0.8968626520085421	5.165598109236784	26.647382951912043	2.4418130776180013e-07	1.4851769228756535e-06	0.830022131393071	6.480775348441805	49.09924947115974	2.433332990419993e-12	1.9194262258767472e-11
RLOC_00005145	0.940566032185793	5.143478167995024	28.78000406871261	8.108395594953757e-08	5.177733391473512e-07	0.8558133795952085	6.451944284805074	51.2145356607221	8.280322051902344e-13	6.754864119885215e-12
RLOC_00005147	0.59764790210658	5.079379991109564	14.60669892948215	0.00013244290200525904	0.0005707658395940925	0.5230802032369815	6.585684421230333	20.929034818717355	4.766154615731679e-06	2.3459848715690063e-05
RLOC_00005151	-0.49876711107241045	3.1814639727242167	3.0883581042974475	0.0788543374872928	0.15108830716218283	-0.6514856088635637	4.821511487726103	10.431446415093655	0.0012388768235279289	0.00433421118634446
RLOC_00005152	0.8353503817717587	4.904057141434519	25.407379646941894	4.6413919788034895e-07	2.741999605710694e-06	1.1855546353967086	6.5069292175627265	98.45384722271254	3.3268870286179895e-23	4.669650656879715e-22
RLOC_00005153	0.6208919032521018	4.600556430738654	12.408420423094297	0.0004274022374271704	0.001679846008427718	0.9758855457699602	6.289871746252798	59.7648758790118	1.0689414571110133e-14	9.699927708045402e-14
RLOC_00005154	-0.024594986887203667	4.328946920615502	0.016227197690007245	0.8986348817676427	0.93100453851739	0.1055918099954347	5.804164254103336	0.5415904087529235	0.46177435590678995	0.5747681046431995
RLOC_00005159	0.45248052704280156	4.72522195135507	6.821455380934487	0.009006913889239436	0.025167575727770987	0.28754255806588996	5.988025543058833	4.454452052159439	0.03481038245923014	0.07703925072501207
RLOC_00005162	-0.6362709967394043	4.488030310822155	12.738524481615219	0.0003582001731456032	0.0014275270621915699	-0.42964963669837153	5.8304165121251215	8.944153415755869	0.0027835907090965023	0.008942753627541057
RLOC_00005165	1.0874115126357087	5.3494862938986065	51.75447083971219	6.289344737701565e-13	5.9968702140228e-12	1.0183062862725152	6.766136345996276	83.1353564005832	7.662287808414867e-20	9.131255357610407e-19
RLOC_00005175	-0.43239569025653	3.095113407012949	2.3232150050377394	0.1274563524542139	0.21820560796874391	-0.1683995305759733	4.517323059472866	0.5815832385522	0.44569241027075185	0.5598617630333361
RLOC_00005178	-0.39594572669261496	3.568636550325912	2.5650195716153785	0.10925120542388796	0.1931815992150877	-0.2967785565393023	5.066976746342436	2.5777316638623162	0.10837686843569408	0.19188005762333088
RLOC_00005180	0.6584770340145046	4.700656643670236	14.174509288391675	0.00016661244808699688	0.0007049969689710976	0.50009215540246	6.582624373404402	19.10257581968837	1.2387758466090598e-05	5.8850260694789677e-05
RLOC_00005189	-0.5015125952313975	4.776611000945823	9.257945865369486	0.0023447586508899615	0.0077748819700072065	-0.23075426721826092	6.527814305758235	3.973977354172083	0.04620850414402676	0.09683494710741257
RLOC_00005191	0.07133132642274055	4.552403558505771	0.16318345451136196	0.6862423403851237	0.7730627845651924	0.14758166022387997	6.170997004236896	1.3162893992726072	0.2512590747879568	0.36638458697204973
RLOC_00005200	0.1201296704502648	4.705377116212329	0.5060043608834048	0.4768736722395771	0.5920316711413293	0.5322612958783592	6.021143524523971	15.425963396638473	8.580130876946757e-05	0.0003696462621135166
RLOC_00005207	0.8774150928438903	4.347154016408223	19.630189373586038	9.39725843042955e-06	4.779671463306658e-05	0.6838756415776273	5.967379805785806	24.540834564695324	7.27515722767597e-07	3.86547954116245e-06
RLOC_00005211	1.900842623388417	7.6605849676269875	214.5031902743188	1.430360996296162e-48	1.0574598407828951e-46	1.8579337560556335	8.875538208529816	409.33607010296026	5.112663844056739e-91	9.417168017324861e-89
RLOC_00005214	-0.29787244504148186	3.7255234339685575	1.502836127807667	0.22023549251172383	0.3320931054852164	-0.4469273045807542	5.233802504996642	6.466592743114388	0.010992107851532497	0.02950809008776264
RLOC_00005219	0.7284276012035169	4.670101346783084	15.357540889807089	8.89651356002998e-05	0.0003964159565076177	0.5195266732348504	5.826042509308659	13.171228172536278	0.0002842803553072247	0.0011331281132765953
RLOC_00005221	-0.6483842656577484	3.6580439262973705	7.596286984330736	0.005848862899003453	0.01735482270032172	-0.24643433235285533	5.252873096237587	2.0135524013927677	0.1558998993833284	0.252280062211092
RLOC_00005222	-0.48390858249551666	3.9706012755138334	5.0639614312967245	0.024428338629228295	0.05811210036928136	-0.3781120068869601	5.628662855420959	6.179138345879581	0.012926521116029243	0.03402244803138406
RLOC_00005224	-0.60091859487413	4.340721365953263	9.988613242950539	0.001575111792278411	0.0054572685133131215	-0.5815486994001997	6.192628236717187	20.129040002163983	7.238917619553742e-06	3.5104570941198495e-05
RLOC_00005231	-0.36547416631292384	3.812380207152505	2.5752228706764173	0.1085488123872214	0.1922958880258269	0.06152845350383425	5.2615583988634755	0.1272978039837529	0.7212503871460613	0.7948365502935338
RLOC_00005234	-1.363631457376633	4.128640851793026	39.26566445626458	3.6988894136687795e-10	2.869988253118614e-09	-0.1982327204225338	5.30670701909292	1.351609886983049	0.24499687128509837	0.35909844361611726
RLOC_00005235	-0.1197692020054157	3.316348000561814	0.1935876578878073	0.6599472654902202	0.7515044039407457	0.05455447509349395	4.726953429855842	0.07088061330332862	0.7900588973883466	0.8476219460126967
RLOC_00005237	1.1797174858939272	5.6582766498174575	65.86905680701511	4.818982846986106e-16	5.7619227708041165e-15	1.280173783687235	6.846638039760541	132.4545872418821	1.1899789196188923e-30	2.2882030544100277e-29
RLOC_00005242	-0.5450134775025838	4.287998006916433	8.201473402551818	0.004185638513022943	0.01294280798518847	-0.48788626050437245	5.646905665151518	10.32687594462848	0.0013110693371169997	0.004563964512729238
RLOC_00005243	-0.07267041191776082	3.519187278685429	0.0832776091378018	0.7729038727996146	0.8397399264893535	0.018095166297786094	5.175442746785468	0.01039293964365573	0.9187997214498373	0.9443444224671407
RLOC_00005244	-0.36882793437158107	4.730991073078604	4.9596930052751595	0.02594481298004175	0.06115146983935301	0.14008310869366375	6.063231969174733	1.104838200590248	0.2932067679796287	0.4123747966534657
RLOC_00005248	1.9957067858176827	6.847739668350941	248.53753707481485	5.410949183171694e-56	6.927334698162982e-54	1.892634047278027	8.313405008611632	393.7330355624299	1.274091709557872e-87	1.9386505592243622e-85
RLOC_00005250	-0.23241125514649635	4.021852033246909	1.099710605703665	0.29432962302151133	0.413360853843455	0.12825565787122137	5.3441622441227965	0.5845161976310287	0.44454754033001664	0.5590925522190758
RLOC_00005251	-0.14314370936686144	6.1466248546430595	1.2182131007783035	0.26971161695823676	0.38583290919337665	0.23001845021249717	7.723069496308318	5.898406101835825	0.01515459291644279	0.039044925406069415
RLOC_00005255	-0.5677975486294581	3.8998299261792875	6.386151917665913	0.01150140955707453	0.03096737561686802	-0.5527880294285978	5.316177692067592	10.349800756199986	0.0012948866094675856	0.004512118988649247
RLOC_00005260	0.6789793647129746	4.676651450861881	14.016825598860063	0.00018118208925264388	0.0007632622684487381	0.3973518334051983	5.99255802915641	8.501161623339685	0.0035491982152806023	0.011110027448488683
RLOC_00005261	-0.8571105469358551	3.6107172025951133	11.320604304082776	0.0007665176366870013	0.0028533326044876337	-0.6056600304735417	5.308911979307717	12.330225958987103	0.0004456824556866101	0.0017133724285074037
RLOC_00005262	-0.4825585937378393	4.018848206491207	4.755375150128815	0.029206925537374064	0.0672500127440677	-0.4573467481223297	5.383012266876609	7.525720292378267	0.006082423019432115	0.017753505499309916
RLOC_00005263	0.7253034235963777	4.796147773432533	18.56390639189479	1.6430218612790532e-05	8.071335282970286e-05	0.9284007436626877	6.246797236854108	52.72089963940955	3.84477964710357e-13	3.2062225190580126e-12
RLOC_00005266	-0.4101236557835045	3.3933622682210784	2.5484643141210976	0.11040151802662372	0.19488736106330853	-0.2563184359451228	4.358844470562891	1.2058844335529644	0.2721487336816104	0.38970124862564476
RLOC_00005271	-0.5923028124775312	3.6513655840627726	6.051500752592967	0.013894482518638071	0.03629367441668636	0.04136361802026512	5.18150744044457	0.05457703238515066	0.8152821133031039	0.8675904021456808
RLOC_00005274	-0.33534272034362694	3.9634133421931006	2.452491360704193	0.11733849977940229	0.2044174528184808	-0.1852240529080349	5.356985190399359	1.2248155042011706	0.26841767349519896	0.38561698947486883
RLOC_00005275	-0.11516364014938749	3.225147305558605	0.17543721267438261	0.675324111439064	0.7636927450430828	-0.7541059635357763	4.716948299382428	12.86717599595639	0.00033439584272003994	0.0013144222960380753
RLOC_00005279	0.698900744119314	4.903611819269554	17.159453990521467	3.436945399836781e-05	0.00016187103098917242	0.5091621676760331	6.1897473509697924	15.709194426377827	7.386424544051192e-05	0.0003213895959503265
RLOC_00005286	0.0729524343271825	4.6888314067796015	0.1892160660017721	0.6635698813297721	0.7545663576906355	0.161295424082012	5.787513907757327	1.2522876987733564	0.2631159886337462	0.37977107020424816
RLOC_00005288	1.3036168539420294	5.54830375643841	81.50198762044595	1.7508539489915435e-19	2.559953308706577e-18	1.1222228016318856	6.9019831508862355	106.07677519671161	7.093310542296355e-25	1.0715491709866106e-23
RLOC_00005289	-0.2551198523652495	2.8563856155181915	0.6708906333251412	0.41274126399127153	0.532304396729775	-0.1740852446043011	4.504434185035358	0.6160178644173993	0.43253093324265957	0.5482484930719163
RLOC_00005293	-0.38684871902984197	4.228364141161039	3.759982204755655	0.05249313720491949	0.1084575781100659	-0.48126989142317	5.5737854742309425	9.61848850751165	0.0019262820553959709	0.006451047942456873
RLOC_00005295	-0.5069348766540431	4.002330094332764	4.78781630331731	0.02866174158214583	0.0662609476171255	-0.4333102640502479	5.395124505920251	6.82887836636027	0.008969557385826119	0.024886729120980024
RLOC_00005296	1.8330861678686048	7.995440661613995	202.47948663365096	6.008535785172096e-46	3.8228853741052525e-44	1.624159250104177	9.272425304943662	330.2854789815959	8.329323598550507e-74	8.172856865531006e-72
RLOC_00005299	-0.7110683504270107	4.089212153886516	10.61375890917533	0.0011224926890314386	0.00401496703558843	-0.5231002411604022	5.741645594055209	12.524122357222318	0.0004017315556618874	0.0015523664346316361
RLOC_00005306	0.9599728170269713	5.2559941328206765	39.96221663256739	2.5892309957648226e-10	2.040671696211645e-09	0.4709870054029616	6.604178801596397	17.153342585309712	3.448021164608823e-05	0.00015543483987646214
RLOC_00005308	1.834578538974261	6.946597833192629	211.80047159401502	5.559832783866499e-48	3.9437246327723315e-46	1.474439365819192	8.236978904732174	247.3293704760567	9.923692060405519e-56	4.8235575436202567e-54
RLOC_00005310	1.0903893292450109	5.7373982278116635	61.48788495270374	4.454757799900681e-15	4.9435568058517284e-14	0.5008015779905416	6.710991146739179	20.269751658517283	6.725551772273124e-06	3.270568228675105e-05
RLOC_00005312	1.4710871503611118	6.436268107604684	139.5837017607231	3.282838228618633e-32	9.735377323174692e-31	1.096300849587234	7.706480469286663	128.11463971703458	1.0594341968479615e-29	1.951403444334517e-28
RLOC_00005316	-0.39954983241913566	4.354198924763174	4.214823932057593	0.040072224807861954	0.08697089436281472	-0.10547104251253721	5.500004868273126	0.44532776516372574	0.504562116021229	0.6127701163802063
RLOC_00005317	0.8391527553995334	6.354447107280032	48.378959022130836	3.5131758475371503e-12	3.154946111843029e-11	0.999619752428877	7.7053189870431265	107.28423985254359	3.8568930999845693e-25	5.9287731561841865e-24
RLOC_00005319	0.5226936105664516	5.016519769519207	10.519089572890433	0.0011814767694264875	0.004213024159456272	0.11773928104360135	6.383392910288705	0.9543652224217269	0.3286106509266203	0.4475977197818612
RLOC_00005322	-0.29307573090561584	3.3963977095289235	1.2816740800386874	0.25758800035741153	0.37313842707078226	-0.6417178686119178	4.8162112632804925	10.091334724203941	0.0014896816639385136	0.0051167731544269025
RLOC_00005330	0.27255028854590846	4.508071606902868	2.2919115690885574	0.13004966604790932	0.22187205508086963	0.10271255325727564	6.185225531600486	0.6420167711022744	0.42298143735788984	0.53913829195344
RLOC_00005331	0.8108846959008326	5.103453923289873	26.716035835969933	2.3565766070095228e-07	1.4366632532163745e-06	0.441507370179556	6.410580197296947	13.5766863116734	0.00022901215893343535	0.0009247687140931299
RLOC_00005334	1.9227640032550872	6.257624846716926	198.42661726474907	4.6045357550852533e-45	2.7941281131147394e-43	1.6845814698781074	7.686289494660885	282.7799286954572	1.8612812453908072e-63	1.1701551973268315e-61
RLOC_00005336	0.6417055677384229	4.933672159585777	15.584152625453488	7.891321703808262e-05	0.0003546365378706299	0.6204334208628576	6.278915261121386	24.56296109800096	7.192094452016998e-07	3.825217814170541e-06
RLOC_00005337	-0.18833051420486474	3.672514400406598	0.6323302175858476	0.4265018609645887	0.54558258386837	0.04374838376440574	5.35664229079147	0.06872802757206692	0.7931978523497333	0.8500341177727723
RLOC_00005339	0.23235584864436773	4.040941902748856	1.1583888490347363	0.28179992971309553	0.3995816335524519	0.13106357537630264	5.655769704527697	0.764775678037088	0.3818381062626168	0.4999274569960362
RLOC_00005341	1.2780482724176458	5.22274029505573	65.77119761859896	5.064294377311101e-16	6.034615479343013e-15	1.3490415830367777	6.878206585864418	148.10914509937152	4.490271153262504e-34	9.966883052453072e-33
RLOC_00005343	0.733824645770666	4.7689081509184215	18.915241851737598	1.3665646098000737e-05	6.805595480873423e-05	0.6808912064639571	6.074498851183421	25.878324375171353	3.636295085412422e-07	1.9915212363977576e-06
RLOC_00005344	0.022485385509675434	3.761111177512286	0.009670180200941958	0.9216646397224584	0.9461459002705706	0.007972611378316728	5.461524933570638	0.002480164696031295	0.9602807690091274	0.9731648449639795
RLOC_00005346	1.0573096518343392	5.383719444022436	50.233154038826385	1.3652166745855397e-12	1.26496422328323e-11	0.7674185667833374	6.711374660978803	46.96696561363144	7.219333745053864e-12	5.5528047611223825e-11
RLOC_00005349	0.13480301803359934	4.6706937197754375	0.6051061554403674	0.4366364018271456	0.5550077426300248	0.1958003198355926	6.16004003318549	2.299081303848588	0.1294505448393466	0.21970599260722598
RLOC_00005352	1.117996000600521	3.8975572561305247	22.891488050889187	1.7140923481967704e-06	9.57665857976035e-06	0.45576742683318555	5.511166901333135	8.380541593469227	0.0037925939201072616	0.011754193598017687
RLOC_00005355	-0.4125015883161759	3.816646834030166	3.383576303241366	0.06584902565049616	0.13047808143836917	-0.4686240540404976	5.2762243261336605	7.2989915022853	0.006899332509544309	0.019807517642249303
RLOC_00005357	0.560938334100098	4.680039137110573	10.774127595745401	0.001029287181025643	0.003715769197526548	0.4150815340582198	6.0760419511049415	9.74460305132361	0.0017984996530031638	0.006067624632673591
RLOC_00005360	-0.47770737660944	3.3962424086695995	3.4645786804710497	0.06269647789426862	0.1254885843534856	-0.41753139418269697	4.4501926372074525	3.374037914698776	0.0662312386883683	0.12980432733961997
RLOC_00005363	0.6414287556351479	5.060324582368666	15.935560174534402	6.553581437417362e-05	0.0002974470295287828	0.3804087888268561	6.238258838759494	9.084749303160724	0.002577498130260638	0.008354786313555554
RLOC_00005365	0.4253712385016659	4.02433253231631	3.7834061377669075	0.05176318741700374	0.10730844026534463	0.49168091975239653	5.459664096512157	9.376846410457016	0.002197432562258522	0.007250899662629773
RLOC_00005370	0.8797759798340626	4.931382490780667	27.124609442243663	1.90754121346412e-07	1.1758877075129964e-06	1.209246643342224	6.521583430902227	103.09722388323819	3.190979078989776e-24	4.640178580375853e-23
RLOC_00005373	1.2659201948348495	6.093243057609492	98.48042767060724	3.282529969416538e-23	5.972270297908979e-22	1.2730402895884316	7.703872012399638	169.7784786476529	8.270830884178175e-39	2.198365910202194e-37
RLOC_00005374	-0.03892800745137169	2.5503303469864624	0.01248408535397072	0.9110357443022036	0.939125416701152	-0.08870842347955302	4.25459456268713	0.13564227950141206	0.7126521948063719	0.7882274916045129
RLOC_00005376	0.5584083194768715	6.277473496365196	22.11299486983252	2.5706368913872094e-06	1.4062817136937426e-05	0.9529452713345389	7.57019579482403	94.93751555271282	1.964905499194989e-22	2.6722205746176412e-21
RLOC_00005386	1.440747348716511	6.146502070046433	122.51882218677379	1.777212306537651e-28	4.289005699777531e-27	1.1625977511584997	7.499855664595549	136.49869732285634	1.552154278781468e-31	3.127844102289181e-30
RLOC_00005392	0.2557565067067816	3.218580614222738	0.8624612071379136	0.3530508556504196	0.4741975284823573	0.029729335624044895	4.6441937862768565	0.01983974452792081	0.8879855762948841	0.9226311579909193
RLOC_00005395	-0.5330297509200482	4.248393203036896	7.431491613818901	0.006409219413497715	0.018783915522864045	-0.21632395930548745	5.52956322689308	1.9105620876635219	0.1669008344239313	0.26605070122115565
RLOC_00005397	0.49432677792813196	3.8933611364894705	4.774204018896864	0.02888919862089441	0.06666933548519445	0.05578478873939734	5.453258278674403	0.12061801599371869	0.7283651656483587	0.8003216352930808
RLOC_00005413	-0.44718982094788484	4.567122964641788	6.542784874251776	0.010531036757566831	0.028730463586521985	-0.39377781437113746	6.060695652782944	8.58066189226535	0.0033975184716809053	0.010679804321610127
RLOC_00005417	0.10434947024036526	4.142481010247927	0.25747866129863706	0.6118576637013655	0.7117998397093235	-0.025309358878539707	5.853796766430164	0.03196058091487597	0.8581141997977703	0.9007799667078207
RLOC_00005420	0.21015858591137182	3.4799377953810784	0.667903336656348	0.4137835556622916	0.5332786326444564	-0.07936480855421069	5.01181216475995	0.17996294757413633	0.6714050847400119	0.7548005123338029
RLOC_00005422	-0.625350428180235	3.601497749826989	6.486839542573318	0.0108676017788579	0.02953354477723278	-0.07084589225072194	5.321011141259263	0.17470981916072525	0.67595951961127	0.7585398670798124
RLOC_00005423	-0.9157360279300553	2.9253459003687374	9.150704684912316	0.002486223000773532	0.008181933875272896	0.10320643152594319	4.692017825182789	0.24762338899292002	0.6187535161025819	0.7109875413769298
RLOC_00005429	0.9750408234594499	4.409350414264391	25.6171703974667	4.1631834812283693e-07	2.470610524925688e-06	0.637697844055059	5.724273098052941	18.616758338423516	1.5980954012327666e-05	7.520575355241065e-05
RLOC_00005439	0.49883595780099244	4.444448938077422	7.118876587347753	0.007627648787136148	0.021842623286239846	0.439304960171662	5.939163344426318	10.078778546137968	0.001499867273243185	0.005142751960084977
RLOC_00005445	-0.5141440434165477	4.12101625956738	6.184883330251029	0.012884619801424779	0.034071218809913685	-0.3533885344150164	5.606869631576379	5.329362702705659	0.020969051293898092	0.05109168473767372
RLOC_00005446	-0.3674885652473898	4.775115282615949	5.046380576493423	0.02467743523337141	0.058638233381605495	-0.27509998425775445	6.298252080084427	4.9014811271755665	0.026833671056541605	0.062260046944227695
RLOC_00005447	-0.4125073238907368	3.3664100562134447	2.53992295469251	0.11100020264061378	0.19574670373276723	-0.2421022512541175	4.6677448493974225	1.3275143370749887	0.24924790160988117	0.363953026031542
RLOC_00005450	-0.6891263037786748	2.848981944065221	5.009076081031765	0.02521476085186701	0.05979321423602888	-0.35772284059848886	4.6912854702310325	2.9294524872903835	0.086976984831842	0.16205348070088896
RLOC_00005452	0.12622402554646908	3.895694594524807	0.3206938434669482	0.5711909685364053	0.6749620427392147	-0.008878944150760746	5.3900812015269715	0.0029035314780276877	0.9570272440564797	0.9713744863219889
RLOC_00005457	-0.4493187708942483	4.18381266794638	4.4337075236872	0.035235888925054665	0.07825393736729933	-0.41789123275209017	5.694569787013375	7.827169656330281	0.00514666286819294	0.015385766928575649
RLOC_00005458	-0.6914675214256191	3.3522061756299446	7.034841485039514	0.007993894880792435	0.02275485587271122	-0.08887006283070438	5.065668258709203	0.2330294658728943	0.6292865669749287	0.7193902076077718
RLOC_00005462	-0.5816262821206055	3.55207697147009	5.550569624869072	0.018474673668339887	0.046229338208159804	0.3521107268760151	5.209489199965303	4.01851002025597	0.04500345533845434	0.09497312112531299
RLOC_00005463	-0.21817492724481816	3.9453560834818506	1.0254891661431702	0.31122049263313356	0.430767119741424	0.557628593213672	5.394674425374514	11.425504751484954	0.0007244274237760438	0.0026752597686333745
RLOC_00005465	-0.28799451090949985	3.6392976059219166	1.4876810569798211	0.22257660578898936	0.3346139492442804	-0.301386023804832	5.255386955128477	3.0054221256814877	0.08298635791932929	0.15615105027162976
RLOC_00005466	-0.16460594669290923	4.752937103094301	0.9326541777610786	0.33417418706029156	0.4543072540480369	-0.04803609018346403	6.065611267097487	0.12977948586567045	0.718660785123068	0.7928982327666131
RLOC_00005467	-0.03837516073088537	4.317616124471776	0.040235629036828424	0.8410205796205897	0.8892297719911292	0.17912583950220143	5.601581818788072	1.3828293156795812	0.23961979929541583	0.35304073432536776
RLOC_00005468	1.8075880569269487	5.451484391735562	137.0497899466567	1.175991167084914e-31	3.39163606375204e-30	1.2481662448592155	6.872131256085882	127.86208368846346	1.2032001424520136e-29	2.2084612404901555e-28
RLOC_00005470	1.3990602184174195	5.330868722248583	83.1336932202689	7.668737307935763e-20	1.1484508453453587e-18	1.3360595110304467	6.671492116460149	132.9544767648838	9.250890578266752e-31	1.7919760181037387e-29
RLOC_00005473	-0.16761677497880514	3.958086209325374	0.6017115575270342	0.43792573350104086	0.5561752177950553	-0.18087315540206814	5.723300253037153	1.5092347035851095	0.21925590095794528	0.329605914111894
RLOC_00005476	-0.7453323635165109	2.9464848336604623	6.202416765011136	0.012757599931040383	0.0337938106897699	-0.35659063394685125	4.54422613725947	2.6296626787258224	0.1048839941584434	0.18702055955664015
RLOC_00005477	-0.3811440988016868	4.632230067907781	4.979150992470549	0.02565457023421527	0.060576175960142135	-0.3128995395486623	6.020683687816822	5.313778693338753	0.02115741905751168	0.0514551176013007
RLOC_00005478	-0.2908761783673126	4.042833580196012	1.8706722772922029	0.17139810262087968	0.27491784282872345	-0.3138658168470117	5.3261382737953475	3.4116628336160635	0.06473718214004012	0.12747105688077293
RLOC_00005479	0.7189015362209402	5.242418297194347	22.664857079241486	1.9286315357135196e-06	1.070691372920176e-05	0.648428600726539	7.006787759117238	38.352904955202334	5.904013699887652e-10	4.032936879318182e-09
RLOC_00005482	1.107460474973279	5.226861986888844	49.08366294128361	2.4527455776592147e-12	2.2351495724189614e-11	0.9835516813897038	6.788844465360942	78.589079723435	7.6470977978127095e-19	8.679662678836286e-18
RLOC_00005483	2.1371488335429234	6.502557951778663	242.74109790409238	9.932021848088252e-55	1.2191065864707878e-52	2.2000978448405206	7.942674881810989	474.70506678070046	3.0333498841945573e-105	8.607335252475314e-103
RLOC_00005484	1.1818560207577824	4.277529949203389	33.1454350848058	8.551690553792715e-09	5.961198368772637e-08	0.7126011313964962	5.589697704504432	21.388717638900925	3.7497124998663804e-06	1.8587455871622817e-05
RLOC_00005485	0.2537574489372404	4.003104466743432	1.2384314760501365	0.26577356089582055	0.38162916732106744	0.6526793705378517	5.590588433063051	18.03337527017706	2.1706587360295413e-05	0.00010035114957980694
RLOC_00005488	0.4828099917664486	3.795113654936276	3.934857516280415	0.047295146860579375	0.09957971354640238	0.3563599795820054	5.289034489313994	4.332053189929708	0.03740110458707656	0.0817522865289325
RLOC_00005494	-0.363365323815989	4.529049788136705	4.305652326998148	0.03798592449638245	0.08325182366660187	-0.3498293189626387	6.466897905390597	8.76480545307778	0.0030709883209128304	0.009761521762417137
RLOC_00005511	0.5303795143553437	4.368076771446408	7.354886676661957	0.006688072514935685	0.01949233349855492	0.32008612445956736	6.003768819405771	5.567727614939845	0.01829448789792125	0.04562323715921026
RLOC_00005513	-0.7492660321105307	3.213451351153676	7.05993556435208	0.0078826832831243	0.022513310389500798	-0.42665245374564803	5.009252262897111	5.115670351201956	0.023710704197860186	0.05629549601387021
RLOC_00005517	0.7835548217253454	4.855358087207067	21.621384809641388	3.321280774437679e-06	1.7926378185114014e-05	0.7333667645300455	6.589353884064818	40.75800523638009	1.722961796463028e-10	1.2124246582483465e-09
RLOC_00005519	-0.7967182687227612	4.266323318688196	16.820248725021116	4.109249203751896e-05	0.0001909645778706835	-0.2479338621470693	6.4494015092406025	4.373369291326888	0.036504744048575184	0.080163837641914
RLOC_00005523	-0.9876942513870298	3.6941351888368446	17.794966303811638	2.4603328869914314e-05	0.00011831687882563467	-0.5644816697268226	5.72291254468021	14.374082571128518	0.0001498507039842746	0.0006248143531099678
RLOC_00005533	-0.2623115554768006	3.493238266307192	1.0233382307193946	0.3117284780708507	0.4311560454584821	-0.6338484815675498	5.478276513875534	15.35724641778069	8.897900251016891e-05	0.00038239482085725065
RLOC_00005537	-0.8434597470336505	2.344291812016141	5.388043750728379	0.020275188703668783	0.04989426418450888	-0.9505866777191965	4.196975108364427	14.060333731139323	0.00017703837314667404	0.0007297706633949473
RLOC_00005546	-0.7575135355471493	4.488394566249882	17.572430446625415	2.7656904606144902e-05	0.00013221410954249052	-0.41524084660776983	6.147665960090304	10.083446735847328	0.0014960722131740843	0.005131415278051196
RLOC_00005547	-1.0674169841105903	4.024341717300462	23.078149832014333	1.5554836017220281e-06	8.746366818895475e-06	-0.41144979020512956	5.9746991714253515	8.913470199106502	0.002830748411999838	0.00908313801270975
RLOC_00005550	-0.1545545261217858	2.386792978079754	0.17724831819658338	0.6737487352875017	0.762589134560452	-0.3251352946834956	4.308672424148962	1.8696900669310237	0.17151058074582737	0.27159722281303794
RLOC_00005551	-0.5953048311326675	3.340904889506598	4.742082049155798	0.029433429405836157	0.06765757431628376	-0.3245309285715898	4.753733379865486	2.5246267715706185	0.11208129701604791	0.19668085197584606
RLOC_00005556	-0.2573747465871624	4.342074166098528	1.7973959109001267	0.18002763564036928	0.2850143445864269	-0.29187833926490236	5.985921415598941	4.540360767314452	0.03310461425028664	0.07389096954967211
RLOC_00005557	-0.10800673994962352	2.7288763337057653	0.11340015992472985	0.7363058185404459	0.8115779433528328	0.18662801535577156	4.437370882823412	0.6811624101445144	0.4091867395726486	0.5261289539750381
RLOC_00005558	0.05945154156547392	4.794578986482038	0.13104983261594239	0.7173460103430689	0.7976589785596374	0.0012726040646563095	6.320199797844119	0.0001071849767484423	0.9917396345359865	0.9940118780900545
RLOC_00005559	0.19527982945132277	4.651448752489782	1.309326176370552	0.2525166910301887	0.36767270768861593	-0.11531136066723013	5.895208503826239	0.6783794710321422	0.4101453065295654	0.5268708642180236
RLOC_00005562	-0.11473624529732879	3.759204127777138	0.25231633314735813	0.6154487780403475	0.7139994774966922	-0.20691224754008963	5.53260370382191	1.7499613170445478	0.18588159542575833	0.28967951170773887
RLOC_00005566	-0.4887323714187027	2.4588744859209846	1.9942473933262395	0.15789748469583684	0.2577527280884614	-0.29441562998785065	4.39659717481262	1.6277131104019493	0.2020196495051048	0.30918430031400806
RLOC_00005568	1.4793923692095317	6.175722186386495	131.43146127511616	1.992358445391701e-30	5.390664680340742e-29	1.2449397446881214	7.59602097896126	159.04902440850617	1.825697437732044e-36	4.3762551138695725e-35
RLOC_00005569	-0.002088483929593	3.999192408238814	9.615383042538284e-05	0.9921762242035499	0.9942598321581584	0.30913414116849697	5.594708966565917	4.098932180060422	0.04291030650267509	0.09128982937620786
RLOC_00005570	0.6446215050401646	4.479433272072214	12.034427071174646	0.0005222688484670272	0.0020135065630579696	0.5522869796290192	5.7110433061925026	13.901427170149018	0.0001926521273880287	0.0007879449495313258
RLOC_00005572	-0.507459871597769	3.7244439432622887	4.888891380517516	0.02703003753747745	0.06321259391143647	-0.2121802178553497	5.521629804010338	1.8257634764529937	0.1766287631965319	0.2778998029072963
RLOC_00005573	1.211489240808306	5.575008067018885	69.20907197945287	8.855975426055523e-17	1.0976390793710848e-15	1.9780499041432382	7.634933032853146	369.1810950096493	2.8216011976910385e-82	3.657282836365212e-80
RLOC_00005575	0.6297998452393315	4.987463205823728	15.196654963146653	9.687487092793702e-05	0.0004291107151904991	0.7533097318131761	6.355011967219032	37.643124547338104	8.494556095922016e-10	5.75011892012155e-09
RLOC_00005583	1.7824693125305933	6.100026499505178	171.46985697322458	3.532994433200937e-39	1.5138520636629975e-37	1.4017910128372641	7.459858679335164	191.79733295178488	1.2883134750326994e-43	4.086405792860517e-42
RLOC_00005590	0.2804220878622671	2.6834592981218917	0.6876067935133303	0.4069795937287884	0.5265555552088761	-0.35724981005496237	4.11475762452864	1.9808041360900654	0.15930571834101698	0.25629033663229195
RLOC_00005596	0.31001495961038117	2.627638603041586	0.841726360756041	0.35890349714867587	0.4801540605412004	0.08140395743611227	4.374542569853316	0.12402638048171455	0.724707929693627	0.7976421589111425
RLOC_00005597	0.08635123513108654	3.534528671212425	0.10166997072654738	0.749834733492031	0.8218589509500253	-0.439573017528622	5.580080074828112	8.078315623900833	0.004479806542110335	0.013640803041072045
RLOC_00005611	-0.5992800035165767	3.7694151002254777	6.659945134706684	0.009860395129601249	0.02719055110862987	-0.29894525675422534	5.412028086682928	3.321314970372803	0.06838710950849414	0.13311017106593992
RLOC_00005613	-0.4002149364694247	2.473232335761722	1.3405966719892413	0.24692877132419525	0.3620472404136036	-0.6248026652365273	4.206482984530224	6.317017063062819	0.011958463090613875	0.0317772472762225
RLOC_00005618	0.33540956173466235	2.423484611867741	0.8491865484213026	0.35678256114763734	0.47774277129182363	-0.03712410003866414	3.6745154646992026	0.016318752264163017	0.8983508784344593	0.9291484457376995
RLOC_00005619	-0.12852268720185142	4.634058090224829	0.5771017142304493	0.4474506040299844	0.5646515736394729	0.11110862149051191	6.095814390485239	0.7093879665097269	0.39964706707293995	0.5172453842700686
RLOC_00005621	-0.8640427448512541	3.1958195739285227	8.808162137962182	0.002998859533039785	0.009636372016483522	-0.3830239758240361	4.677553102941083	3.323838385389885	0.06828223427555594	0.13293068378621578
RLOC_00005628	0.12225093870843719	4.107608227550469	0.3473209086744251	0.5556336306927567	0.6617177373808916	-0.503364305654278	5.7510823309579395	11.673085765391043	0.000634107498324007	0.002370902644196492
RLOC_00005635	-0.47340720062449076	3.469525704704323	3.6451068793943233	0.05623419444579004	0.1150073321183054	-0.23708987369744403	5.248630787866759	1.8595280661532976	0.17267927807334107	0.27291280151919434
RLOC_00005636	-0.37275600652070173	3.3593965509258203	2.0463709877662297	0.1525694820816438	0.25096747459935703	-0.24447556554413305	5.188593626087079	1.9002615105661373	0.16804905060591108	0.26748741393442393
RLOC_00005640	-1.3576025361824762	4.857225331671924	59.645655070054445	1.1356972029019928e-14	1.2278629491313202e-13	-0.7611257936605507	6.102258727936445	32.030025083325526	1.518080200209765e-08	9.239608128696998e-08
RLOC_00005644	-0.2772350512018107	3.6463420786674297	1.2550290376389945	0.2625941275827133	0.37848551701948063	-0.09353782715414433	5.418924031291183	0.3291003197414524	0.5661893332334231	0.6653506023427874
RLOC_00005651	-0.8444568362547569	4.004375946135409	15.778136180000569	7.12207992280076e-05	0.00032171942783804807	-0.1533462422809336	5.80050246423447	1.1341825925344393	0.28688493960453715	0.4060400351722884
RLOC_00005653	-0.019617322368175063	3.432072743861666	0.005977250795978328	0.938374802338475	0.9580877917670989	-0.488837881036059	5.250094230053254	7.805196813119858	0.0052096191662345855	0.015534164051774189
RLOC_00005658	-0.5063418357260695	2.287889059666386	1.8625196650628135	0.17233427625653197	0.2760398584286043	-0.5975547057183423	4.3736708502088595	6.471175932844627	0.010963796346690249	0.029439615816854458
RLOC_00005660	0.029653676570357487	4.160120352343406	0.02087699568382817	0.885114548158344	0.9211789953966784	-0.045869709269170555	5.8194661429896195	0.1028991657589895	0.748377875928996	0.8154072540411975
RLOC_00005661	1.190320268688426	5.176800932122937	56.047501256598636	7.074105678437017e-14	7.23115495737408e-13	0.9339840065251782	6.589071790243249	65.10773801799422	7.091306891301381e-16	6.971126502975019e-15
RLOC_00005665	-0.38744234541204553	4.325794658032955	4.2070169811259674	0.040257072354565646	0.08733596726146521	-0.33213204966668164	5.905356253425365	5.614548260076157	0.017811972035231674	0.044685279426020866
RLOC_00005668	-0.3469133807634122	3.0316836535203717	1.4120666186522686	0.23471362556057465	0.3481734691443991	-0.33236416251911144	4.8344420681131055	2.800487348247496	0.09423565936440176	0.1725462482851158
RLOC_00005677	-0.3652298291489823	3.329070674127585	1.9106361026844025	0.1668926164676613	0.2694297090487993	-0.5327185698385544	3.940400282520476	3.8976135495587303	0.04835474835073469	0.10054991145461745
RLOC_00005681	0.018657213218220822	4.649498582844139	0.012073543541829324	0.9125047998924835	0.9402208117757551	0.6574980977977173	5.81976675480163	20.90653627493548	4.822462567286329e-06	2.3714770254772443e-05
RLOC_00005683	-0.6003273457902468	3.6046048376687314	6.144159150678762	0.013184684208095295	0.034750895007929807	-0.40519229839353404	4.690285715432264	3.7466448187352936	0.05291362471194967	0.10847928629019424
RLOC_00005685	-0.41158359878430095	3.6885393846089194	3.0652345478296184	0.07998361907412876	0.1526126084894458	-0.47116640455051945	5.362563203834398	7.846330978463929	0.0050923952214291645	0.015244030781925348
RLOC_00005690	0.6467582597808313	4.494905283865587	12.06481333821472	0.0005138245434627392	0.001982407224282189	0.8345557284241336	5.937616062895882	35.632746357714495	2.382487055563487e-09	1.561406466689204e-08
RLOC_00005693	0.32026733273620284	3.9721355891805152	2.048284950689842	0.15237775727810493	0.2507306733394272	0.26693923613425014	5.584413176939275	3.040585502691239	0.08120662231684612	0.15356418006206185
RLOC_00005694	-0.0301080919340784	4.409152583145017	0.02702715672886491	0.8694167502225969	0.9099837531243092	-0.14329871415658219	5.898972869586066	1.0483229693873426	0.3058936384268548	0.42509295960867616
RLOC_00005695	0.8833177882784998	5.20417864987064	33.00969501398585	9.170045733077227e-09	6.371088028182973e-08	0.709615658797431	6.51636896257559	36.90574002616609	1.2398040657950089e-09	8.269823943317534e-09
RLOC_00005696	0.3724929728003214	3.9166373165281994	2.7830333540797274	0.09526757849323422	0.174513964026064	0.481054073509239	5.369886859012065	8.356223447906391	0.003843685815157531	0.011900577225992014
RLOC_00005704	-0.3136213979469894	3.979835061291766	2.1052561575032978	0.146793759090366	0.24371989291960494	-0.25230475744891406	5.621975128511488	2.7558116247088504	0.09690163022854546	0.17647358469548982
RLOC_00005706	0.8145009015142635	3.6579948624616847	10.639253586585951	0.0011071234843193143	0.003969461181142131	0.07017809977297038	5.123654075451259	0.15118629548489348	0.697404259913162	0.7766042495330797
RLOC_00005710	0.31074814226145053	5.377488924689627	4.637715683692485	0.03127660748493645	0.07117468262372224	0.13106211282215327	6.745154089329045	1.4207823236440376	0.23327467936975424	0.34572993488185344
RLOC_00005711	0.27176916840805815	5.269635300689574	3.4456704429396323	0.06341768742150296	0.1266664540622028	0.2852245820360156	6.743568848450012	6.71186511025414	0.00957735028364178	0.026308896030338844
RLOC_00005712	0.5183256808437505	6.159860962841845	16.855688582981337	4.0332261745258124e-05	0.0001878139977010631	0.49663343587260844	7.470878281710575	25.837494112911266	3.714032490888175e-07	2.0319764003040617e-06
RLOC_00005715	0.7883921622268538	3.4543380100428256	9.179898964911729	0.0024468753072396923	0.00808284989786101	-0.2535959797735448	4.517906518880048	1.31424819960981	0.2516269337863651	0.3667172651059199
RLOC_00005717	0.5171209617203233	4.70029114832759	9.216682316615433	0.0023981973845976583	0.007932034071678078	0.8659160770142168	5.865905684016289	36.72564490096046	1.359788389684277e-09	9.052896831512506e-09
RLOC_00005719	0.39253309914337015	5.086190865005251	5.849051946338912	0.015585445315349111	0.04005287758152631	0.6351099882621768	6.55679525300175	30.268705139341908	3.7614616174251975e-08	2.2273877902621063e-07
RLOC_00005720	-0.3882465218879933	2.9941500448276503	1.7024917716171197	0.1919624298874982	0.2997949403390295	-0.5999003562371189	4.761770797653267	8.522003743066893	0.003508779490852591	0.01100240400341592
RLOC_00005721	-0.04896652368701827	3.0916709436910885	0.029173944664803053	0.8643780258937187	0.9066986926291226	-0.3528003617658813	5.023094732178748	3.543143400797776	0.059792046480226506	0.1195044157616406
RLOC_00005723	-0.2880068650727122	2.118912882079831	0.5531081632479444	0.4570504741248539	0.5727042107140984	-0.3179999135308476	3.986999787423074	1.4520028525684632	0.2282068495990116	0.34023625588469514
RLOC_00005727	0.732610408840966	2.7789075062985944	4.876599249286034	0.027223203941079934	0.06357935372045766	0.010057082790120983	4.452820861652893	0.001995156945949761	0.9643725943486784	0.9757187538077627
RLOC_00005728	0.6276403735654735	4.9842350227061285	15.006996398642766	0.00010711332581309494	0.0004689223079173773	0.6666888873344822	6.366841061746269	29.856981865288915	4.651189223354573e-08	2.73573308997197e-07
RLOC_00005729	-0.3177873997114135	3.617986883976657	1.7768817694395702	0.18253269383480566	0.28806798254326366	-0.028904903087333223	4.912680296720424	0.022483321736465278	0.8808084851085489	0.9178767528689485
RLOC_00005730	0.6310815569475854	5.1065019934310785	15.282836850676453	9.255364601382343e-05	0.00041135824549242946	0.5463915756034733	6.6569452536383125	23.53793839357509	1.2247479017443356e-06	6.387793452763924e-06
RLOC_00005744	-0.2378438169583415	4.183641954827218	1.3915820055128783	0.23813811839329424	0.3520594235872135	-0.34340004371523425	5.369342426881064	4.225044242829441	0.03983158079240224	0.08604768862951256
RLOC_00005745	0.4956517512056537	3.9187222904124708	4.774283879612138	0.028887858706486327	0.06666933548519445	0.2849491594118314	5.728853186208265	3.7764493750959565	0.05197885009870665	0.10690335855682462
RLOC_00005748	-0.5853496855397516	3.7313278090792785	6.319128256137697	0.011944233457840675	0.03201093924090806	-0.16824587313396513	5.397664006846103	1.0444154317699557	0.3067967781926043	0.4256156678441005
RLOC_00005755	0.8465923591064727	4.922653347847339	25.793009148266613	3.800625763743321e-07	2.2695659424219217e-06	0.4054212793499314	6.355568879616222	11.097269454046746	0.0008645491932764464	0.0031364554181787874
RLOC_00005756	-0.5111379993349108	3.973799297852646	5.632289124072747	0.01763259087283796	0.044532516834194	-0.11893603581618117	5.354267827810795	0.5048037455589798	0.4773969684636766	0.5896695025764871
RLOC_00005757	-0.08412420606676951	3.259710993678981	0.09386039901405407	0.7593256533198897	0.8290816586179152	-0.07926758699233541	5.001769572661628	0.17851893668671703	0.6726491445036483	0.755875347120176
RLOC_00005759	1.2688212191486568	5.96032653057737	89.49977717425944	3.066730100988563e-21	4.975971035576187e-20	1.002181966559168	7.067514956111277	91.02459134580258	1.4189761372858966e-21	1.8460756462657532e-20
RLOC_00005761	0.36724933958549627	4.79898466827926	4.868199435774837	0.027356029205309784	0.0637760592043842	-0.12513187876589796	6.378162696157018	1.0724171791025041	0.3004000999322557	0.41950443450383196
RLOC_00005768	-0.13169590545112797	3.8659633523480936	0.3497902872530805	0.5542318673719965	0.6606196204198681	-0.3734372589611021	5.023283696510911	3.9653266256688076	0.04644651026542155	0.09727546604361875
RLOC_00005769	-0.09411235988390546	3.8249035049158304	0.1656155658712981	0.6840381571997518	0.7714244493353112	0.2851281389910232	5.424060377735259	3.07747622597101	0.07938361945650951	0.15074129511193585
RLOC_00005772	-1.821567227570753	4.997613221346195	106.39211675214972	6.049792156346904e-25	1.2074280999492357e-23	-0.9854993971789722	7.130006580790294	87.79676559499352	7.25374567174226e-21	9.098814313933332e-20
RLOC_00005773	0.5928723147518887	4.951116015108355	13.128918646618246	0.0002907725486856663	0.0011813197430735778	0.6731844373503987	6.5873709163191165	34.40116784165325	4.484541185014921e-09	2.8706581003078633e-08
RLOC_00005776	-1.8272478563414352	4.946925393199091	115.97371623155006	4.816377208012347e-27	1.085028496345786e-25	-1.014863259627317	7.169441666667368	93.90706330567791	3.306919353568801e-22	4.468384336308731e-21
RLOC_00005777	0.9311796940739152	5.049857829024306	33.758977937949346	6.238048975788331e-09	4.389211672106294e-08	0.6983484742277036	6.422503831227436	33.86028276797728	5.9215288333877115e-09	3.7272260924303106e-08
RLOC_00005779	-0.2727741408148996	3.6545559708510624	1.3261279949414932	0.24949522134573066	0.3646388463994822	0.18711387014789496	5.022829330055279	1.0095349449107411	0.31501427759038203	0.4333510089650709
RLOC_00005790	-0.679280352311024	3.360113018851605	6.9038066036913905	0.008601241935865792	0.024182066910208647	-0.5664620753365895	4.983213836421802	8.782388979104315	0.0030415260287794134	0.009676661144289413
RLOC_00005792	-0.7777719152072501	3.47634304389711	9.548590656870982	0.0020010299861581587	0.006752331496804289	-0.5175235123436607	5.183664336429362	8.354202459096598	0.003847963253875536	0.011910308432322892
RLOC_00005793	-0.8705158151582321	4.671059109888756	26.23441488299141	3.023853377065441e-07	1.8191640545806876e-06	-0.7546157906901908	6.4542423733055205	39.29460111898457	3.6444763018176354e-10	2.523968119576738e-09
RLOC_00005794	0.15879285971486967	2.3956477423620584	0.19559169961169243	0.6583028787842393	0.7502837500246384	-0.2364517592784956	4.070690244119607	0.8494017061408572	0.3567216472957534	0.47610255748175717
RLOC_00005795	-0.028623780716947957	3.081846384591132	0.010027504161558287	0.9202352226944942	0.9452670614331508	-0.14038216094192393	4.442791587521773	0.3849895739899045	0.5349449234657736	0.6390972634805595
RLOC_00005797	0.194803378756317	4.542525693752243	1.18088798713951	0.27717529315984757	0.39449379441324295	0.7538098469335401	6.164836272473471	33.496820063860724	7.138059934899811e-09	4.4529109480994124e-08
RLOC_00005798	-0.15867375354983573	3.2929887654921712	0.3426371034896043	0.5583109766486535	0.6640023374711186	-0.007063502020120474	5.117963622206133	0.0015268797899832265	0.9688303463256056	0.9789256691823208
RLOC_00005800	0.2433071076957943	4.826644888788925	2.162037652223532	0.14145699576090973	0.2368445839709777	0.44353340890584325	6.092759654380722	11.232581562879492	0.0008037376954569424	0.002939199604528888
RLOC_00005802	-0.30921370070031823	3.8692338378921463	1.8544342005705632	0.1732685500889341	0.2770040006082579	-0.15128629708247435	5.2373182700009915	0.7540382602612916	0.3852006977418597	0.5030342539832882
RLOC_00005803	-1.3683519576696201	1.9731492826298855	11.011653242018056	0.0009054085452121791	0.0033083811025539354	-0.032585172339879655	3.5128208116984494	0.01132025990440777	0.91526760328128	0.9416359203184869
RLOC_00005804	0.15054189389125391	4.460335953874617	0.6843966302521634	0.408076859134081	0.5277521074953949	0.12798554632479367	5.72581463068406	0.7609706412661978	0.38302493356707956	0.5011323650517812
RLOC_00005805	-0.2348598204415113	3.0172334886836563	0.6407918250269597	0.42342421125226576	0.5426818910665713	0.21955834946107944	4.293395166426971	0.8557060170128716	0.35494312874959705	0.47423618080198776
RLOC_00005806	0.11361924259569096	4.221030657074558	0.3203459372748636	0.5713998234714068	0.6751328471359401	0.06882849957016209	5.815879445055099	0.23179437541340553	0.6301965063854107	0.7200384286146945
RLOC_00005808	0.7347178777048974	5.293907233492683	24.223192666177592	8.579291047798582e-07	4.937795911172671e-06	0.9079133332364338	6.9127505972520655	71.10475726299293	3.387522904513156e-17	3.57802846825791e-16
RLOC_00005811	-0.0720066638928414	3.1938777221385997	0.06615058152147313	0.7970262725316675	0.8580844845695257	-0.41577728908285333	4.7114235332663705	4.004773298077054	0.04537159841279365	0.0955579562158316
RLOC_00005812	-0.5611110955106839	2.6588297486939028	2.9673445211206246	0.08496121271353502	0.15981415715224703	-0.12773576545227133	4.537807190587678	0.3395536545905702	0.5600869742999746	0.660491198829095
RLOC_00005815	0.06377595527120636	4.925496203748618	0.1573492081466803	0.6916088554644966	0.7769785963235195	0.5473919509074907	6.4147606789391745	20.861180649757337	4.938013609985952e-06	2.42602736973526e-05
RLOC_00005818	0.12070170968280369	3.0203010780156707	0.16465326496714505	0.6849080068558261	0.7718573241584097	-0.2712658567347492	4.910294106689347	1.9633423666274514	0.1611563090254851	0.25871255175207464
RLOC_00005819	-0.052650006769962336	4.7588527848216176	0.09666876536359403	0.755864472950251	0.8268276791738809	0.31639187026935844	6.531292475328888	7.519597276998894	0.0061031323165195075	0.017799107275316195
RLOC_00005822	-0.2629496608967858	2.8989927740096006	0.74402576232576	0.38837432685198403	0.5090715049684266	-0.10629156285950306	4.832918025560938	0.289118564894443	0.5907859289903187	0.6875855472752671
RLOC_00005824	0.0706951632916737	3.984731403696436	0.10836669217998374	0.7420113507517015	0.8158394595927276	0.16955950579492965	5.272704131641768	0.9727467111491332	0.32399611112435306	0.44240280539661625
RLOC_00005825	-0.44215479598986857	3.8932482534882427	3.9826779895127906	0.045970421103892684	0.09725866198078706	-0.06331076878679953	5.165263885855077	0.12623276880249268	0.7223704648718272	0.7958203054238524
RLOC_00005827	0.6756812706263625	6.157734688917283	28.066248912031106	1.1723264450092552e-07	7.391641453277575e-07	0.30234064119502574	7.601280108020554	9.921009006241832	0.0016340277786068866	0.005566404168589781
RLOC_00005830	0.8738878171000086	5.215493313548624	31.913957523268362	1.6115499999600964e-08	1.0957287499728687e-07	0.8364158283071995	6.461696361456664	49.22595325543632	2.2811259825263545e-12	1.80751258041843e-11
RLOC_00005832	0.8231731433471741	4.609668352423376	21.65977338052223	3.2554706284991944e-06	1.758925921666729e-05	0.3881689919524578	6.190001647387199	9.173188693072358	0.002455863030462147	0.008000032875216284
RLOC_00005834	0.45358795440665617	4.250559709671188	5.316642503726344	0.02112267257662626	0.05147303080534413	0.32892789729011096	5.941324050627506	5.671475039623253	0.01724295137521756	0.043507269043116845
RLOC_00005836	-0.3305354707347523	2.9024933580810157	1.0908389827083091	0.2962853921840405	0.415607168245331	-0.4757143811372184	4.839198040315349	5.706247980304408	0.01690463258121589	0.04280794439705394
RLOC_00005843	-0.05331959800109555	4.011362716006837	0.05930763739715417	0.8075936130067655	0.8645847184728762	-0.014170110685808824	5.628287170829781	0.008794502291085138	0.9252847075871393	0.9483174682699508
RLOC_00005846	1.3574758062731014	6.347201096165654	120.86248294565087	4.095602167786919e-28	9.749576316876888e-27	1.010047900286198	7.65096681090345	108.09137088411562	2.5666856924001443e-25	4.0041059560934795e-24
RLOC_00005847	0.6551615218499249	2.6465800435746467	3.7033740828829558	0.05430255350749264	0.11162486914463635	-0.49068585728151337	3.6385368737836243	2.724174911189073	0.09883918658637152	0.1791321629501665
RLOC_00005849	0.043775474176843444	3.8852998735488895	0.03807476537451038	0.8452930860769265	0.892386043607761	-0.03448413839965368	5.857787556553988	0.05949520659066643	0.8072955730840741	0.8609239433021528
RLOC_00005854	0.8881778423084338	5.393030876557257	36.91764304627704	1.2322581151488528e-09	9.213850208570269e-09	0.9525921984180465	6.959500390499215	79.44858770559696	4.949384413248626e-19	5.654362019009502e-18
RLOC_00005856	-0.3908192860929415	3.276737047666684	2.1452301515084304	0.14301358812697681	0.2389553793024037	-0.28876655494807785	4.653567496849215	1.867096116699953	0.1718080357385657	0.27188309574680475
RLOC_00005859	1.4270730640214275	4.9536356375292065	70.8786815651707	3.798807023573082e-17	4.851566439594917e-16	0.5458839655755593	6.218200096397993	18.33875011567471	1.849076063110898e-05	8.628199816267252e-05
RLOC_00005861	-0.47446133422106385	2.8467927668577215	2.1796170852504044	0.13984925253599398	0.23471422112276016	-0.35015743802253	4.673400598415485	2.772809725105745	0.09587773065949917	0.17500352819785844
RLOC_00005868	0.6551812943939033	2.2332652498087993	2.8262617237460588	0.09273399040531348	0.17130414064314287	-0.3717034861473612	3.8997800316048394	1.8701976238677622	0.17145244712044436	0.27154612193657346
RLOC_00005871	1.2557117405943157	5.46580672313121	71.713673574764	2.4880244848071835e-17	3.224602597716767e-16	1.0478319779283523	6.778306281472439	88.22721793418108	5.835144560068264e-21	7.345705364047567e-20
RLOC_00005874	-0.5531090003853943	4.187835650715081	7.742337940812322	0.005394091866229972	0.016123911278952803	-0.2606638941355085	6.229858854282812	4.22431140029865	0.03984878548056503	0.08604944441802803
RLOC_00005875	-0.8429702806788715	2.7505157957135546	6.954264689680313	0.008361965996699134	0.023610521525913798	-0.4836886673413769	4.269032130706726	3.9923198317200015	0.0457080922142456	0.0961124094046394
RLOC_00005877	-0.5024515302072091	4.609472873609861	8.533261035961191	0.003487143405673007	0.011049813302974715	0.18249567122306826	6.672574565902694	2.6643383549121316	0.1026204914887509	0.1842266476175982
RLOC_00005879	-0.47249916187486835	4.422610800148132	6.735755367136285	0.009449920824257515	0.026244780109273915	-0.3949073911747252	6.235248476265389	9.662787397935933	0.0018803809546007256	0.006319500525721197
RLOC_00005881	-0.6025548940144231	3.7654310911071707	6.485635342115531	0.010874966289204105	0.029545909964820052	-0.17548750807227817	5.687910359771464	1.3905746267206318	0.23830808291600328	0.3517003883237445
RLOC_00005882	-0.5926277238851327	2.772301893189074	3.397845192199423	0.06528164689077615	0.12952688131910187	-0.28523758782964526	4.323383177222357	1.4560177140127029	0.22756480847817645	0.3395200972306913
RLOC_00005887	-1.1982553656853947	2.9891450087007994	15.995029673321165	6.350899839612992e-05	0.00028912292504881695	-0.2818063418990802	4.563347838705397	1.6699808389089128	0.19626110095193194	0.30242619453166275
RLOC_00005890	0.5853400315040481	5.205637515185571	15.137324215015747	9.996721980949115e-05	0.0004415043641396879	0.6196336278462266	6.776657619482835	31.764098512799457	1.74081001760801e-08	1.0546315276899305e-07
RLOC_00005906	-0.46765198763488863	3.3610867618485076	3.2354580007247598	0.07206015211620401	0.1404544145777775	-0.6125403683272563	5.153705971291742	11.391927076222714	0.0007376396875702518	0.002719269339817442
RLOC_00005907	-0.11953561730242106	3.3984225173001588	0.21910699142430934	0.639721190061432	0.7347901554802782	-0.30781297485848824	5.1147507758140325	2.8573980837513018	0.0909545131364965	0.1675612271310891
RLOC_00005909	0.5485407869533394	5.033099920303057	10.32177022717876	0.0013147012708926117	0.004631378280713472	0.6922560128447218	6.647518168283888	37.32508403703155	9.99902075192989e-10	6.729469158622558e-09
RLOC_00005917	1.2490724365557548	5.270199634597911	61.33791853188616	4.8073212135233865e-15	5.312342957849317e-14	0.840669439993769	6.699255199036215	55.81341512183852	7.96859230493503e-14	6.891453921706169e-13
RLOC_00005919	-0.690398157770623	3.9052363586756558	10.012935679961968	0.0015544454771851581	0.005392785399699203	-0.3716842905954132	5.564315804689173	5.7342633436470365	0.016637044978718752	0.04223218936933466
RLOC_00005922	-0.28458209999969647	3.4883914094968205	1.3184905629969956	0.2508631271759454	0.3660492256443065	-0.033025549200392794	5.007447026583708	0.031112214803705518	0.8599902710334643	0.9019116827070565
RLOC_00005923	1.2037265672834199	4.804845416399891	46.35080836725976	9.886670665372559e-12	8.620454206402087e-11	1.3951941845183065	6.417861946368461	126.30175259587219	2.6411025638028724e-29	4.764421961746797e-28
RLOC_00005924	-0.19304758867124122	2.9269188823510977	0.4120212988389065	0.5209453527761073	0.6309280472362223	-0.22844545156529203	4.395028881557359	0.9826971664801283	0.321533825165424	0.43966953555966015
RLOC_00005925	-0.31654676519485075	3.6883455116545005	1.8343227273461933	0.1756178186275081	0.27989006527274635	-0.3699659242796247	5.150005155261674	4.217098925422862	0.04001852687939064	0.08636269552039513
RLOC_00005926	1.424620619083972	6.510025235575073	132.97974616106475	9.133888290346052e-31	2.510145530682012e-29	1.2804281953796526	7.778633105151609	174.45692531018895	7.866856976763313e-40	2.1717089519130802e-38
RLOC_00005930	0.14002088573455285	1.9458137000233287	0.11470891893941415	0.7348454960747409	0.8106672387019217	-0.031092903483587824	3.6723463459447157	0.011461579434145719	0.9147423588544684	0.9413722824557014
RLOC_00005933	-0.25827400237192144	2.32199094465925	0.5051478160765779	0.4772469073506634	0.5922849075975013	-0.4610021092236651	3.741121245798108	2.579516334284272	0.10825473543515733	0.19176083471127328
RLOC_00005939	-0.19722672910877184	2.87397101439077	0.40157687960110167	0.5262760122785818	0.6351857411934412	-0.16823210637654354	5.155512351489374	0.883239614233208	0.34731590786836125	0.4670769459087902
RLOC_00005940	-0.01899684303326907	3.963646116345211	0.007014522623983055	0.9332530184141384	0.954436452733719	-0.4332209493434163	5.303228626353554	6.361632760364357	0.0116614183622664	0.031121817840730794
RLOC_00005945	-0.8023359813768618	3.153506033558296	8.205212980354645	0.004177020563628393	0.012919965196514694	-0.02626598043057128	4.869102733721354	0.018119407507327878	0.892921540477273	0.9253561596556006
RLOC_00005946	0.49261110371613004	4.330527958981603	6.069785468990219	0.013751366203978757	0.03597354657597034	0.46865873097912386	5.911252395676272	11.28574049676704	0.0007810467329991567	0.002864201763799562
RLOC_00005948	2.5656821042912195	7.921923768133759	376.9831516010238	5.646552248089188e-84	5.740354414016062e-81	2.3673828873905203	9.19249359839026	642.9109036659728	7.77790888292882e-142	8.166026536186969e-139
RLOC_00005949	0.12797525595053422	2.4789974587215178	0.13294769810850604	0.7153951307681264	0.7957425389705226	-0.23061414432325317	3.8699212287359606	0.7114051891746107	0.398977717489568	0.5166338253481715
RLOC_00005950	-0.5240892248971588	3.2764287325332133	3.7148683074947613	0.053929878859670315	0.11093178955919487	-0.21386213973168747	4.957529881041813	1.260221730096069	0.2616091242828887	0.37785585305352154
RLOC_00005951	2.296213888717951	7.741099849005683	321.2303729970051	7.814495510876993e-72	2.8288473749374713e-69	1.9923086004224366	8.819261422895753	460.6944214535399	3.3944812231072755e-102	8.909664590350822e-100
RLOC_00005952	-0.3567253596972967	3.8396956277207184	2.4931878412229835	0.11433991814671338	0.20015682186163034	-0.23496411960346167	5.368472801106233	1.988127089474558	0.1585368464466498	0.2553272512415058
RLOC_00005954	-0.3713767990117389	3.9979425269596276	2.742128626358599	0.09773449952377158	0.1776344833795973	-0.36279912251352564	5.2248423273635405	4.260098012856021	0.03901767015650649	0.08460275071729899
RLOC_00005962	-1.0730410156618244	4.815043975640742	41.90853861264736	9.564406422009399e-11	7.789537518871581e-10	-0.4440830639269807	6.316064987026509	12.812733926241023	0.00034426813240013453	0.0013496904862094893
RLOC_00005963	-0.6889647230472454	3.0454824306059725	5.62132011634057	0.01774327929110888	0.044754672272479826	-0.5197982996080878	5.2361131016760964	8.722129993747645	0.0031437054909233537	0.009965508438769411
RLOC_00005965	-0.12754229564631775	4.509768183411751	0.5162513645692695	0.4724451384392872	0.5878612652280304	-0.24611410188537572	6.208079400477897	3.7196895274242294	0.05377436906124174	0.10981853740011226
RLOC_00005966	0.9526753212957907	5.121285073646803	35.355573083801715	2.7468146050717427e-09	1.9832228145834356e-08	0.6263047776350082	6.273507657584966	24.93397417815961	5.932764448055432e-07	3.1795862144019385e-06
RLOC_00005967	1.1105384656527846	5.132600571670226	48.17573448996798	3.896809462450985e-12	3.487528195806517e-11	0.7256047307731192	6.43444169195121	36.69806483668442	1.3791627698469647e-09	9.176064588481167e-09
RLOC_00005968	-0.16413710227592523	3.60417626077136	0.45372369306420035	0.500571915788024	0.6130429271981656	-0.5982297667105426	5.428673547216429	13.216012083194311	0.0002775675741563136	0.0011067914778074958
RLOC_00005969	-0.21480469037302913	3.6629227445415666	0.8339583085346596	0.3611304344608819	0.4822115620669471	-0.35407331809141723	5.499219890935252	4.971434425371112	0.025769267802421603	0.060149298056386045
RLOC_00005971	0.07908472708251231	3.488621167713909	0.10096607196674601	0.750673375646896	0.8226063776138949	-0.4282267402790115	5.10907119089717	5.474704567010431	0.019293621572131513	0.047706955460623826
RLOC_00005972	-0.26847981869060944	3.899633500567291	1.3675547152181462	0.24223246212705754	0.3567059036905387	0.28560216490363266	5.701060451481375	3.730974884434864	0.05341221090982505	0.10922765920184128
RLOC_00005985	0.8593099838203208	5.093665449895436	29.206444252510465	6.506245101157623e-08	4.1877719847917056e-07	0.32388477864307397	6.481703650751987	7.649329910667008	0.0056793413389562035	0.016716401659013506
RLOC_00005991	-0.04493447065394312	2.7841655047582528	0.020249015493035427	0.8868438083646489	0.922247280853104	-0.1442215981676136	3.8918194711070146	0.28291917450260406	0.5947942386572289	0.6911726299570832
RLOC_00005993	-0.030574883829329325	4.6099651836837765	0.030115191691120202	0.8622291178065848	0.9050776201113416	0.168077391827556	6.031223444883105	1.5587906326889254	0.21184238277381326	0.3211744659555618
RLOC_00005994	0.9597681379024748	5.088726326929647	35.940177977394924	2.0346946699081458e-09	1.489555414553397e-08	0.636038234311809	6.696164828433122	32.337865314266	1.295637889709083e-08	7.940982022215798e-08
RLOC_00006006	-0.24830876123455511	4.094904340607635	1.4362674390649515	0.23074430622486378	0.34383839152161166	-0.01970242164393625	5.532913366147069	0.0159594588312455	0.8994701149005038	0.9297564966368406
RLOC_00006007	1.4112998408009385	6.330122624396834	123.03200388974862	1.372176242414612e-28	3.342252016906867e-27	1.4806452506869334	7.7927842041040725	229.06763394862804	9.520896196709483e-52	4.0634101288314173e-50
RLOC_00006009	0.06742545225507723	4.114507614663203	0.10303370084212782	0.7482190070136143	0.8204306596646044	0.31536030382581864	5.637948583828809	4.376281826624085	0.036442410815265	0.08004369689319399
RLOC_00006010	-0.2979812455233169	4.34150343012668	2.534438965272643	0.11138647124788693	0.19619717704032164	0.16017269653763033	5.989130533770052	1.3848544330823822	0.23927598837492867	0.3526331558040955
RLOC_00006011	2.7731917105871045	8.383779468515344	397.729437049505	1.7187437765741583e-88	3.6086744332951024e-85	2.907740086813216	9.791423694387381	945.5619775897907	1.2231011915924447e-207	6.420669705264538e-204
RLOC_00006015	0.378766625571077	4.387916483525784	4.077029044832392	0.04347002781955923	0.09281032175101338	0.5661141070289814	5.76811331215039	15.109121604189264	0.00010147179950192352	0.00043236705477706777
RLOC_00006016	-0.5840991215438276	3.328037434447513	4.977661122123292	0.02567667399947492	0.06061473434820951	-0.3420747043452112	4.667555597039829	2.6367804207595094	0.10441495152714762	0.1864552566431102
RLOC_00006017	0.34688066048653854	5.820493794162388	6.508079627368515	0.010738541704579111	0.02922063525522849	0.31153555104645475	7.323660107258829	9.80614996277957	0.0017392924253633343	0.005896296794927235
RLOC_00006019	0.04610778076406473	2.8591162528271417	0.020675866701608037	0.8856654687328559	0.9213869874895968	-0.26207093652457925	4.477074143432503	1.3657865818397572	0.24253712845054573	0.35643859344936724
RLOC_00006021	1.162964749876904	5.341625630921115	51.864422775497474	5.946823976228682e-13	5.6819395595361865e-12	0.942909169512694	6.794931335505065	72.61890006946817	1.5726573195834498e-17	1.688274969152008e-16
RLOC_00006027	0.10861713375156855	4.027427854527535	0.2613199591094264	0.6092147721096568	0.7094432946335955	-0.22298031386336536	5.378020685603039	1.8034946723968626	0.17929057955833155	0.28145511285629826
RLOC_00006032	0.6724264586608523	5.173175326572966	19.348153478605127	1.0892452304454043e-05	5.489628626603867e-05	0.3729823558261197	6.687929792831262	11.176633912041744	0.000828339160093303	0.003015510694112201
RLOC_00006037	-0.20130341627268483	2.2403180894385875	0.29422171280264947	0.5875277724078625	0.689995139807332	-0.13838438215939666	3.6492245752028025	0.2225697857072535	0.637088808084873	0.7264113158213599
RLOC_00006038	0.6690461702082613	4.219315692279316	10.940234048342418	0.0009409828194680184	0.0034300130690191866	0.5954558890924053	5.9327650399202305	18.334683268360408	1.8530273611752535e-05	8.638958376988892e-05
RLOC_00006040	-0.434971651703416	4.556579855982883	6.085461749188905	0.013629873960261676	0.03572694552679827	-0.32585660486872775	5.959682968903083	5.573069371494004	0.01823876232411119	0.04553835092528975
RLOC_00006046	-0.7552579800733967	4.117539950600058	13.61410617879534	0.00022449234083520128	0.000930039697745834	-0.5069112646855164	6.006604616765687	13.69146261104446	0.0002154316170603323	0.000875654877087274
RLOC_00006053	-0.13181456193913613	5.04205178141599	0.7195362013365147	0.39629608565972607	0.5164245664418824	-0.3327442158575391	6.373529419864862	7.493925899905632	0.006190744456312377	0.018014585933155115
RLOC_00006054	-0.5458685562421516	2.8180409037629524	2.9482090837458035	0.08597278292646568	0.1614277007980749	-0.5974909899572629	4.394453787338563	6.562943429089884	0.010412399790649904	0.02821883980434521
RLOC_00006055	-0.19652325056051684	3.839467466895408	0.7539328928259899	0.3852339031688175	0.5060292186519327	-0.48628618833084924	5.2564776259362915	7.75205710866146	0.005365139449237544	0.015934540050224887
RLOC_00006056	0.12306337243970435	2.715126593314781	0.1419953155708129	0.7063054012369652	0.7886841958474398	-0.5587763526543145	4.388540684568115	5.7335379697557025	0.016643917976432054	0.042239423455296146
RLOC_00006057	-0.409300190913584	2.9352370083035133	1.607100308279561	0.20489988885028704	0.31493982915817176	0.04119501455367211	4.270943594261041	0.02964607623910931	0.8632957380353383	0.9042495856972992
RLOC_00006058	-0.7342275325262404	3.5166447477238347	8.925823573123665	0.0028116654412276448	0.00912986817259753	-0.3287693366988315	4.276569766496243	1.8723206592014145	0.17120952804446468	0.27128415860833605
RLOC_00006071	-0.11837010222804555	3.1654621327949912	0.1784057639976333	0.6727468965361202	0.7617837255782752	-0.06408220153244008	5.217272368628651	0.13390869288312324	0.7144133048507586	0.7895395039608541
RLOC_00006072	0.6404040074082326	4.723560630440141	14.010060185800954	0.00018183514722966057	0.0007657061274035205	1.4717452177760162	6.772264683971761	165.96200243113023	5.63853476003656e-38	1.4438774742835082e-36
RLOC_00006075	-0.16656149189497754	4.073267136008897	0.6388220097441517	0.4241376866414297	0.5432646942852281	-0.09466606661597846	5.465405507531212	0.34976174905449886	0.554248029134092	0.6556676121553614
RLOC_00006076	-0.024700554688846587	3.8674475422890913	0.012492231355243966	0.9110068445860263	0.939125416701152	-0.21373811624371147	5.655819517271574	2.020739092728504	0.155163601718777	0.25128222342209466
RLOC_00006088	-0.1794498194069728	3.112886215822882	0.40071091031132067	0.5267223414335168	0.635532186063702	-0.6097695621212993	5.08432380506079	10.783371732714436	0.001024159547686826	0.0036561207382400495
RLOC_00006091	-0.537117419451469	3.9477900709687206	5.939785020411001	0.01480282414439584	0.038370382189596916	0.011824344090150275	5.529926131053513	0.005740691502300166	0.9396041914319033	0.9581824129410156
RLOC_00006092	0.7808485405121217	4.845712582318313	21.431594787725473	3.6667887668582298e-06	1.9700075984891347e-05	0.8941330886575327	6.6108575849272695	60.434346822167704	7.60739142267034e-15	7.000000223191577e-14
RLOC_00006095	0.1618129181604016	6.552862794142663	1.9006414048043414	0.16800654300511805	0.2708850696464029	0.30486649383696546	7.965067603594042	10.851049437533653	0.000987397838522461	0.003538119422063931
RLOC_00006102	-0.3489443180104321	3.859136792431635	2.4996366206786713	0.11387256966002363	0.19954373646084517	-0.30530413414947577	5.496483264209393	3.691637366876213	0.05468590765371553	0.11124730564936242
RLOC_00006104	-0.19742912281364336	2.830410448231014	0.4062200431312144	0.5238943241957881	0.6333305637272435	0.19697047110756552	4.317986285213134	0.6992709087868572	0.4030287879423331	0.5203393070101519
RLOC_00006105	0.807337678099142	4.429198211094268	17.86272327728561	2.3742649680973388e-05	0.0001143350166747058	0.6934353352779022	6.047335443791965	26.313730261342386	2.9021809559419513e-07	1.599474953093677e-06
RLOC_00006106	-0.5078587939800464	3.549279107900383	3.842029219474524	0.04998299407222636	0.10424683772025296	-0.6945591602896899	5.525140283718408	19.01679025235847	1.2957326925657608e-05	6.14448850011198e-05
RLOC_00006109	0.17634585668857625	3.9409196447958452	0.6246992781169203	0.42930634645229426	0.5480128921517734	-0.2269229322294282	5.993161872828945	2.763421196933966	0.09644179375584037	0.1758802141119625
RLOC_00006110	-0.5541599993601701	3.3255932460804463	4.278051134380949	0.03860759091836533	0.08433260288410305	-0.23752529948977946	5.002519715264279	1.5938343918038065	0.20677916053031992	0.31482696972939606
RLOC_00006119	-0.19778917053756176	4.907052643297838	1.530662876387856	0.21601298607632644	0.32737178112159304	-0.24094054151402516	6.495018750600695	4.2453128516894	0.03935881738285248	0.08516657537151036
RLOC_00006123	-0.6143963450384092	4.151806889342878	8.587350184146688	0.003385062221952414	0.010752309593360496	-0.4804587588395882	5.715292699515101	10.429610198094874	0.001240109135000016	0.004335632969818571
RLOC_00006207	-0.7248631705076205	3.573303390977239	8.962107657195503	0.002756367212000193	0.00896694855642331	-0.18887668172487176	5.10903399949959	1.0782971051878993	0.29907881772339673	0.4183915399437631
RLOC_00006214	0.24260006341457424	5.614682133090569	3.177148404756754	0.07467494547841395	0.1446540103057852	0.3388220570298468	7.161614705641539	11.074706363831158	0.0008751327717074475	0.0031699483726718605
RLOC_00006215	-0.5612973688361004	3.2635823848522105	4.4144215872082375	0.035636358345538965	0.07896946548622755	-0.4098976123632323	4.762381863928899	4.035834587239833	0.04454363806985364	0.09421105078472873
RLOC_00006217	-0.12269873024616315	3.8316476251150773	0.29174127604793876	0.5891068344585694	0.6913017170075718	0.18183050690297226	5.814354173923728	1.6162708335840401	0.20361255159609887	0.31084897228169694
RLOC_00006221	-0.5686204982008272	2.9012712791647464	3.5306643878075135	0.060243643453661656	0.12148247579265081	-0.11314451132720632	4.380420886887599	0.239788429737823	0.6243589637123514	0.7159397946719067
RLOC_00006223	0.07802412945544347	3.8428887271910863	0.11654211664969516	0.7328155315224479	0.8092034763776859	-0.10693026372977742	5.1506881721507645	0.3565623432737324	0.5504216484247957	0.6525380405162522
RLOC_00006227	-0.5529581041271151	3.9871582261204637	6.5568291310897	0.010448238101984383	0.028563959269435432	-0.5304203010027936	5.460250720604671	10.700074293703917	0.0010713123245365795	0.003806903949979157
RLOC_00006232	-0.15281246867808268	3.123270224880595	0.2771138340709616	0.5985991821122693	0.6993205223474964	-0.530872826675048	5.273727559579248	9.319171316897446	0.0022676853022261744	0.007451777148066543
RLOC_00006233	-0.008324308170928905	4.331692986939457	0.0019249816303759104	0.9650043520223958	0.9760685699519328	-0.12629323433177064	5.844311525128894	0.7901124537017237	0.37406612413826	0.49288657596982827
RLOC_00006246	-0.25504951111859003	2.5404285877559785	0.5663918539494432	0.45169627041513	0.5683014677394577	-0.330179179998848	4.277715178933781	1.8885807274973967	0.16936208839928685	0.26916932578021685
RLOC_00006247	0.5325630609465346	5.128692201635899	11.989903316913132	0.0005348956487906438	0.00205464124442158	0.3368093690498409	6.785656821597107	9.515188420353256	0.002037781807865724	0.006781195309281216
RLOC_00006251	-0.26092243385800185	4.050751123512203	1.5047898399022817	0.21993583515895077	0.331831905360544	-0.29015210886706916	4.786102901460081	2.068641433193643	0.150355405645945	0.2450832795958355
RLOC_00006256	0.8471479911367948	5.267552884832302	31.573714198750316	1.9201114931867023e-08	1.2946262334922288e-07	0.9211895340139187	6.843305416449868	70.88670679889591	3.783385883777708e-17	3.9881293568054373e-16
RLOC_00006264	0.13504742424409838	4.270386461182318	0.48212120969071504	0.48746306364129366	0.6008438701545498	0.3455192846597827	6.062322591081716	6.703059662068297	0.009624760936590296	0.02641149113258273
RLOC_00006266	-0.217897894613247	3.274008391683193	0.6693869126738315	0.4132654388422168	0.5328090862094265	0.03374449826057978	4.551793672337765	0.02399695015411285	0.8768926718681671	0.9148858354311722
RLOC_00006267	1.0145839904564653	4.68147223043416	32.89847636697013	9.709933841979528e-09	6.732819383956478e-08	0.6111356876665154	6.190497497626438	22.568839449387237	2.0274650970542215e-06	1.0393728541978648e-05
RLOC_00006275	-0.6474876797151939	3.308173593992341	6.023916679459198	0.014113291658626527	0.03681026977199038	-0.43699272194800404	4.943674339910321	5.153639218379679	0.023197706087870987	0.055365473111288366
RLOC_00006277	0.3527885440056402	5.2600620467995896	5.611540735256487	0.01784256791718968	0.04495111062986735	0.23395461793967867	6.507736132122661	4.058590093703415	0.04394717781143679	0.09313714570897756
RLOC_00006283	1.9974162563798177	7.601477599670781	255.76952298867306	1.4344576208310753e-57	2.1512765862120896e-55	1.7269224395663796	8.85195217485014	357.7302086140791	8.786760510054625e-80	1.0853199834713355e-77
RLOC_00006284	-0.1391774620852949	2.7143710102297995	0.15774130795731622	0.6912446104586267	0.776780766494826	-0.13320095691016262	4.375528377209545	0.3305652419200462	0.5653264425702186	0.6645911090770703
RLOC_00006289	2.410738183136106	8.061623015840885	335.31059590515287	6.701314141700174e-75	3.350018850455639e-72	2.1405608220224517	9.375107706957248	547.6513930658592	4.082343369213451e-121	1.7144209213348807e-118
RLOC_00006292	-0.4040402620815796	3.4617962294838582	2.6089907088457505	0.10625937124498858	0.18906964056438816	-0.14543647410312194	5.170714166283883	0.6664580772234661	0.4142892147194564	0.5308949670864851
RLOC_00006297	-0.7031854807001577	3.3027182060117655	6.931303813031287	0.008469992040714348	0.023851388530960093	-0.5004864981360312	5.163357466789674	7.7170406048528095	0.005470199273423211	0.016200739681712355
RLOC_00006298	0.025733806387567466	4.062699782139598	0.014992336085137503	0.9025480309144951	0.9338846725146626	-0.12101053013531703	5.203183531835324	0.47182759111711636	0.49214759054544577	0.6024318005289303
RLOC_00006305	0.7985267898828408	5.284014564055933	28.294240918384713	1.0420554966989888e-07	6.601990708718156e-07	0.7272629145293436	6.821595064658589	44.395147002524226	2.683515009013961e-11	1.998171920541672e-10
RLOC_00006306	-0.7611380586544437	4.319623369773282	15.982209771565351	6.394052290017067e-05	0.00029096125245166527	-0.4282492655850872	5.928939153140951	9.412714878678866	0.002154859377970981	0.007118901387450388
RLOC_00006308	-0.5558444602029122	3.3481152914533876	4.441181363683001	0.03508196398799108	0.0779945908398836	-0.5963986905699662	4.275699510979435	6.045028230110698	0.013945510051023315	0.03635806059739106
RLOC_00006315	0.3192883626320349	4.646682353762364	3.3279122680766857	0.06811328314916706	0.1340557267528976	0.003618041899016059	5.944526287721461	0.0006885306279627024	0.9790660174337414	0.9859211698673365
RLOC_00006320	-0.2752841717116639	6.809772824253119	5.358953675398855	0.020616139389339955	0.050512474410074844	-0.2194129805340531	8.482413276334041	6.080621802912212	0.01366726560927557	0.035774774777308456
RLOC_00006322	-1.2973514156487072	9.82222635212206	78.99046834439764	6.241032132457193e-19	8.770864166872238e-18	-0.7250245572188583	11.014318970920709	71.94932037182977	2.2079580347734156e-17	2.351049838446865e-16
RLOC_00006325	-0.2639614549526335	3.4766090414592905	1.1013784824367607	0.2939637839729507	0.4130681038881055	-0.3755618613507922	4.62994721684046	3.0895554104943725	0.07879633442041298	0.1497886502045837
RLOC_00006328	-0.5855189539904606	8.89392097808461	19.019635097744242	1.2938023627692912e-05	6.461625691889639e-05	0.03205933040549121	10.40454945117242	0.14290565750960127	0.7054093135109275	0.7831333808344325
RLOC_00006331	-0.4081531105516012	3.4626757111119804	2.615968094221609	0.10579294376365186	0.18836742259681433	0.04680081184518183	4.545350778158281	0.04597175280678689	0.830227153723399	0.8806379962560078
RLOC_00006334	-0.05857904897673572	5.046673792681438	0.1411704363499071	0.7071202016507949	0.7892527313352526	-0.015491524973683392	6.436203595508523	0.01704391930540794	0.8961294294472476	0.9276733267369999
RLOC_00006336	-0.4172721834520954	8.533645403622119	10.000510560374977	0.0015649683238954343	0.0054274983363905745	0.3068455462525038	9.874456428213106	12.963994026664523	0.0003175390342233822	0.0012556844897594311
RLOC_00006339	-0.10468035713709224	3.172271362194743	0.13033334362785798	0.718086666941214	0.7983000818693997	-0.33543652637730287	4.78582670616823	2.757895864414	0.09677544523064582	0.17631055424145908
RLOC_00006352	-0.17476537674818143	3.447833119159916	0.4664621773250408	0.4946192505953016	0.6078802262642795	0.12743161092756744	5.33855036564445	0.5748491450286801	0.44833840387301854	0.562243777145583
RLOC_00006354	0.24614281395658283	3.659035783022736	1.0665834757075652	0.30171843483347605	0.42122533273025003	0.31881535359189583	5.57203027766638	4.30155920368597	0.038077448004713715	0.08300978542389728
RLOC_00006355	1.6530282767013436	6.643899610187081	177.6186268916924	1.6046836827360514e-40	7.727508853836269e-39	1.3545208461179035	7.885480325143859	198.0766427085955	5.489861866679386e-45	1.835606998033977e-43
RLOC_00006366	-0.8253732527694072	3.016718296331427	7.828825966402973	0.0051419487740615045	0.015467099779397614	-0.22439493391583012	4.60267811114079	1.088725723798976	0.29675371979813003	0.415914738240631
RLOC_00006367	-0.1339084831611721	3.386660600032522	0.2508361723290147	0.6164869173040359	0.7148088864433144	-0.302362566879482	4.996438485243851	2.5665180924275077	0.10914773541601243	0.1928749201698746
RLOC_00006375	1.8855841198053236	6.172253794028674	194.1533683139196	3.942671373910352e-44	2.286749396868004e-42	1.305525321695884	7.245533695166121	157.97768622746278	3.129800152420401e-36	7.451195419560497e-35
RLOC_00006376	0.9603034883856538	5.6164063005315255	47.13609678558726	6.622474759630322e-12	5.812938129314308e-11	0.8742455950191149	7.110295745839666	70.74186933071132	4.0715904816962185e-17	4.2833295057443487e-16
RLOC_00006383	1.7561347191967316	6.803318819011831	204.24272262251014	2.4775482397814833e-46	1.6255813388266256e-44	1.3827138499335434	8.174718449563585	217.25132022428033	3.5971415306639646e-49	1.3829894502180516e-47
RLOC_00006384	-0.4119948536450125	3.286866285616642	2.412444213874285	0.12037428699557276	0.20859842602831344	-0.26672544119245706	4.883836695871093	1.8693533226394052	0.1715491626428201	0.271617351619208
RLOC_00006387	0.04755280546638374	4.502445698657022	0.07187393566793254	0.7886276204324639	0.8516626642629366	0.00294327088802025	6.193119798516614	0.0005297197587115221	0.9816377960539063	0.9877530401351314
RLOC_00006392	0.11386808232753112	5.869235674235535	0.7799850977214629	0.3771456974717921	0.4973964236254866	-0.03445534449948696	6.4574325369232355	0.08540798395581373	0.7700982037045193	0.8317314104200956
RLOC_00006395	1.8031373676069704	6.587225991840838	203.7601209707284	3.157377574421833e-46	2.046058628165457e-44	1.6365441715708233	8.067667111599732	290.61407654663515	3.653886679850019e-65	2.474977822693248e-63
RLOC_00006396	-0.36026492827848833	3.7894895809430875	2.5120156938623177	0.11298133705073318	0.1983076536295932	0.09056903722953083	5.704818023160561	0.37648731210539843	0.5394891888852796	0.6427708799485418
RLOC_00006397	-0.1143724754754469	4.6323802118610455	0.4388519852941277	0.5076770742146288	0.6189967130821055	-0.13699274157756242	5.641308454917069	0.8251831170194901	0.36366908942746307	0.48288374477032187
RLOC_00006408	0.7674769218492766	5.384416658983008	26.501036640150154	2.633967293948515e-07	1.5974227990682558e-06	0.8032433818380205	6.738821601447316	51.99059482834327	5.57671118542604e-13	4.602978831429874e-12
RLOC_00006409	-0.283341294186726	2.2742597956610235	0.5958413046250051	0.44016917040752307	0.5582140554407076	-0.6499758305665092	4.221417578576391	6.893293170326851	0.008651973158568381	0.024165221120460077
RLOC_00006416	1.3778524158028536	6.396193486115499	123.00069065808006	1.3940035741774042e-28	3.387557759656109e-27	0.9533142286617027	7.815742305364919	100.1737282888224	1.3959897635466465e-23	1.9886698137688253e-22
RLOC_00006424	0.5186761625075239	4.845268428761537	9.75334507011151	0.001789967081191121	0.006120871146040517	0.2734017750944353	6.3845287415248215	5.144443546282121	0.02332088342070685	0.055583644729625695
RLOC_00006426	0.1549074798539135	4.411315087761583	0.7094923432793012	0.39961239314339614	0.5194565259063116	-0.09801913728278895	5.753334352071313	0.451896119154676	0.5014358903122148	0.6105271265670814
RLOC_00006427	1.1485243274553876	4.852843063685347	44.658325472936994	2.3459791579150423e-11	1.9845357936979944e-10	0.8573590249286173	6.14098222446061	42.355497640518585	7.61021130215521e-11	5.498940706216624e-10
RLOC_00006429	1.0354081856968738	6.211200383036223	62.45285844589576	2.7289942739105727e-15	3.0640622339586303e-14	1.0965975718025658	7.495237131871587	122.17974623177545	2.1084390896057927e-28	3.6894170002952034e-27
RLOC_00006432	0.24215058145456334	4.173629237528414	1.4192970869517374	0.2335191337517037	0.3469408245294913	0.34320546445763056	5.444356562675976	4.527461537500027	0.03335505917816654	0.07435133042708504
RLOC_00006435	-0.5902590879017099	3.896281851117789	6.902487710660646	0.008607589348398613	0.024188439943800325	-0.35769587840702055	5.314806682963841	4.388957048130971	0.03617243417016558	0.07956036197876667
RLOC_00006452	0.13524491742645195	4.491737843266093	0.5218061499838669	0.47007224513339724	0.5855621026165593	0.3808904919787072	5.798729725789417	7.000047899096904	0.008150753495473657	0.022948447559393383
RLOC_00006454	-0.05486846054899646	2.9570930465045464	0.0336755371534776	0.8543986917538507	0.8991056000432965	0.0522971799127473	4.785626237996352	0.0679326705871004	0.7943709374649709	0.8509438294505386
RLOC_00006455	0.3571748469463441	3.8203318960170476	2.4681112408704675	0.11617745619223502	0.2026798802601328	0.38937525725053707	5.697986926344782	6.8991058281220585	0.008623887188687146	0.024112434512390504
RLOC_00006461	1.4610800338259333	5.518605373468964	99.00568599428294	2.5177783286786653e-23	4.612851115963111e-22	1.0875042062962736	6.937134907641823	101.37852843677888	7.598297107635848e-24	1.0928016620968325e-22
RLOC_00006471	-0.149595084878642	3.486362566736006	0.34524464600216653	0.5568174439147033	0.6628267973938718	-0.029458067131868312	5.307798053872857	0.030014318243774873	0.8624577459932886	0.9038674261512814
RLOC_00006476	-0.5526009746567393	3.819391859451443	6.126326545249272	0.01331833143518469	0.035041564763551095	-0.3381808815017732	5.392258405372695	4.172695851886253	0.04108038557038758	0.08818298264230202
RLOC_00006477	-0.03126426383219225	3.8153419543889977	0.017169971165726494	0.8957482239874258	0.9289306386861599	-0.2288857830548376	5.536862477300623	2.1484223449078415	0.14271647384030886	0.23581684904774988
RLOC_00006482	0.24833423191698345	3.5899922592489597	1.0165135595883368	0.31334743249312574	0.4329456891698913	-0.22261554547143417	5.1370928771257045	1.5225014388910232	0.21724134310199414	0.3272334090714256
RLOC_00006483	0.4867212089260588	4.063847566127646	4.92340656030379	0.026495225239123326	0.06218351767500931	0.5289700346140283	5.594342036254636	11.93339274911153	0.0005513667457859806	0.0020765114153319508
RLOC_00006484	-0.45811381734714657	2.4146176392466447	1.7042460557829004	0.19173362050164813	0.2995267184562949	-0.13550050701513017	3.673566966429694	0.21678354792130472	0.641501698497456	0.7296994943147119
RLOC_00006485	0.9359525536839682	4.977497397935417	31.314116356629576	2.1947797850570816e-08	1.47319681480366e-07	0.6790776716342238	6.478173991189894	33.0573577922832	8.947978868302161e-09	5.5391998902302115e-08
[truncated: 8,609 more rows]
