# Supplementary material for: Widespread premature transcription termination of Arabidopsis thaliana NLR genes by the spen protein FPA
Source: eLife. 2021 Apr 27;10:e65537. doi: 10.7554/eLife.65537 (PMC8116057; doi:10.7554/eLife.65537)
Supplement: Figure 2—source data 1. [file elife-65537-fig2-data1.tds]

1	StringTie	transcript	3642	5949	1000	+	.	transcript_id "STRG.1.1"; gene_id "STRG.1"; locus "RLOC_00000001";
1	StringTie	exon	3642	3913	1000	+	.	transcript_id "STRG.1.1"; gene_id "STRG.1";
1	StringTie	exon	3996	4276	1000	+	.	transcript_id "STRG.1.1"; gene_id "STRG.1";
1	StringTie	exon	4486	4605	1000	+	.	transcript_id "STRG.1.1"; gene_id "STRG.1";
1	StringTie	exon	4706	5095	1000	+	.	transcript_id "STRG.1.1"; gene_id "STRG.1";
1	StringTie	exon	5174	5326	1000	+	.	transcript_id "STRG.1.1"; gene_id "STRG.1";
1	StringTie	exon	5439	5949	1000	+	.	transcript_id "STRG.1.1"; gene_id "STRG.1";
1	StringTie	CDS	3760	3913	.	+	0	transcript_id "STRG.1.1"; gene_id "STRG.1";
1	StringTie	CDS	3996	4276	.	+	2	transcript_id "STRG.1.1"; gene_id "STRG.1";
1	StringTie	CDS	4486	4605	.	+	0	transcript_id "STRG.1.1"; gene_id "STRG.1";
1	StringTie	CDS	4706	5095	.	+	0	transcript_id "STRG.1.1"; gene_id "STRG.1";
1	StringTie	CDS	5174	5326	.	+	0	transcript_id "STRG.1.1"; gene_id "STRG.1";
1	StringTie	CDS	5439	5630	.	+	0	transcript_id "STRG.1.1"; gene_id "STRG.1";
1	StringTie	transcript	5886	13621	1000	-	.	transcript_id "STRG.2.1"; gene_id "STRG.2"; locus "RLOC_00000002";
1	StringTie	exon	5886	6263	1000	-	.	transcript_id "STRG.2.1"; gene_id "STRG.2";
1	StringTie	exon	6437	7069	1000	-	.	transcript_id "STRG.2.1"; gene_id "STRG.2";
1	StringTie	exon	7157	7232	1000	-	.	transcript_id "STRG.2.1"; gene_id "STRG.2";
1	StringTie	exon	7384	7450	1000	-	.	transcript_id "STRG.2.1"; gene_id "STRG.2";
1	StringTie	exon	7564	7649	1000	-	.	transcript_id "STRG.2.1"; gene_id "STRG.2";
1	StringTie	exon	7762	7835	1000	-	.	transcript_id "STRG.2.1"; gene_id "STRG.2";
1	StringTie	exon	7942	7987	1000	-	.	transcript_id "STRG.2.1"; gene_id "STRG.2";
1	StringTie	exon	8236	8325	1000	-	.	transcript_id "STRG.2.1"; gene_id "STRG.2";
1	StringTie	exon	8417	8464	1000	-	.	transcript_id "STRG.2.1"; gene_id "STRG.2";
1	StringTie	exon	8571	13173	1000	-	.	transcript_id "STRG.2.1"; gene_id "STRG.2";
1	StringTie	exon	13335	13621	1000	-	.	transcript_id "STRG.2.1"; gene_id "STRG.2";
1	StringTie	CDS	6915	7069	.	-	2	transcript_id "STRG.2.1"; gene_id "STRG.2";
1	StringTie	CDS	7157	7232	.	-	0	transcript_id "STRG.2.1"; gene_id "STRG.2";
1	StringTie	CDS	7384	7450	.	-	1	transcript_id "STRG.2.1"; gene_id "STRG.2";
1	StringTie	CDS	7564	7649	.	-	0	transcript_id "STRG.2.1"; gene_id "STRG.2";
1	StringTie	CDS	7762	7835	.	-	2	transcript_id "STRG.2.1"; gene_id "STRG.2";
1	StringTie	CDS	7942	7987	.	-	0	transcript_id "STRG.2.1"; gene_id "STRG.2";
1	StringTie	CDS	8236	8325	.	-	0	transcript_id "STRG.2.1"; gene_id "STRG.2";
1	StringTie	CDS	8417	8464	.	-	0	transcript_id "STRG.2.1"; gene_id "STRG.2";
1	StringTie	CDS	8571	8666	.	-	0	transcript_id "STRG.2.1"; gene_id "STRG.2";
1	StringTie	transcript	5886	13621	1000	-	.	transcript_id "STRG.2.2"; gene_id "STRG.2"; locus "RLOC_00000002";
1	StringTie	exon	5886	6263	1000	-	.	transcript_id "STRG.2.2"; gene_id "STRG.2";
1	StringTie	exon	6437	7069	1000	-	.	transcript_id "STRG.2.2"; gene_id "STRG.2";
1	StringTie	exon	7157	7232	1000	-	.	transcript_id "STRG.2.2"; gene_id "STRG.2";
1	StringTie	exon	7384	7450	1000	-	.	transcript_id "STRG.2.2"; gene_id "STRG.2";
1	StringTie	exon	7564	8325	1000	-	.	transcript_id "STRG.2.2"; gene_id "STRG.2";
1	StringTie	exon	8417	8464	1000	-	.	transcript_id "STRG.2.2"; gene_id "STRG.2";
1	StringTie	exon	8571	13173	1000	-	.	transcript_id "STRG.2.2"; gene_id "STRG.2";
1	StringTie	exon	13335	13621	1000	-	.	transcript_id "STRG.2.2"; gene_id "STRG.2";
1	StringTie	CDS	11864	12940	.	-	0	transcript_id "STRG.2.2"; gene_id "STRG.2";
1	StringTie	transcript	6344	13621	1000	-	.	transcript_id "STRG.2.3"; gene_id "STRG.2"; locus "RLOC_00000002";
1	StringTie	exon	6344	7069	1000	-	.	transcript_id "STRG.2.3"; gene_id "STRG.2";
1	StringTie	exon	7157	7232	1000	-	.	transcript_id "STRG.2.3"; gene_id "STRG.2";
1	StringTie	exon	7384	7450	1000	-	.	transcript_id "STRG.2.3"; gene_id "STRG.2";
1	StringTie	exon	7564	7649	1000	-	.	transcript_id "STRG.2.3"; gene_id "STRG.2";
1	StringTie	exon	7762	7835	1000	-	.	transcript_id "STRG.2.3"; gene_id "STRG.2";
1	StringTie	exon	7942	7987	1000	-	.	transcript_id "STRG.2.3"; gene_id "STRG.2";
1	StringTie	exon	8236	8325	1000	-	.	transcript_id "STRG.2.3"; gene_id "STRG.2";
1	StringTie	exon	8417	8464	1000	-	.	transcript_id "STRG.2.3"; gene_id "STRG.2";
1	StringTie	exon	8571	13173	1000	-	.	transcript_id "STRG.2.3"; gene_id "STRG.2";
1	StringTie	exon	13335	13621	1000	-	.	transcript_id "STRG.2.3"; gene_id "STRG.2";
1	StringTie	CDS	6915	7069	.	-	2	transcript_id "STRG.2.3"; gene_id "STRG.2";
1	StringTie	CDS	7157	7232	.	-	0	transcript_id "STRG.2.3"; gene_id "STRG.2";
1	StringTie	CDS	7384	7450	.	-	1	transcript_id "STRG.2.3"; gene_id "STRG.2";
1	StringTie	CDS	7564	7649	.	-	0	transcript_id "STRG.2.3"; gene_id "STRG.2";
1	StringTie	CDS	7762	7835	.	-	2	transcript_id "STRG.2.3"; gene_id "STRG.2";
1	StringTie	CDS	7942	7987	.	-	0	transcript_id "STRG.2.3"; gene_id "STRG.2";
1	StringTie	CDS	8236	8325	.	-	0	transcript_id "STRG.2.3"; gene_id "STRG.2";
1	StringTie	CDS	8417	8464	.	-	0	transcript_id "STRG.2.3"; gene_id "STRG.2";
1	StringTie	CDS	8571	8666	.	-	0	transcript_id "STRG.2.3"; gene_id "STRG.2";
1	StringTie	transcript	6344	13621	1000	-	.	transcript_id "STRG.2.4"; gene_id "STRG.2"; locus "RLOC_00000002";
1	StringTie	exon	6344	7069	1000	-	.	transcript_id "STRG.2.4"; gene_id "STRG.2";
1	StringTie	exon	7157	7232	1000	-	.	transcript_id "STRG.2.4"; gene_id "STRG.2";
1	StringTie	exon	7384	7450	1000	-	.	transcript_id "STRG.2.4"; gene_id "STRG.2";
1	StringTie	exon	7564	7649	1000	-	.	transcript_id "STRG.2.4"; gene_id "STRG.2";
1	StringTie	exon	7762	7987	1000	-	.	transcript_id "STRG.2.4"; gene_id "STRG.2";
1	StringTie	exon	8236	8325	1000	-	.	transcript_id "STRG.2.4"; gene_id "STRG.2";
1	StringTie	exon	8417	8464	1000	-	.	transcript_id "STRG.2.4"; gene_id "STRG.2";
1	StringTie	exon	8571	13173	1000	-	.	transcript_id "STRG.2.4"; gene_id "STRG.2";
1	StringTie	exon	13335	13621	1000	-	.	transcript_id "STRG.2.4"; gene_id "STRG.2";
1	StringTie	CDS	11864	12940	.	-	0	transcript_id "STRG.2.4"; gene_id "STRG.2";
1	StringTie	transcript	6344	13621	1000	-	.	transcript_id "STRG.2.5"; gene_id "STRG.2"; locus "RLOC_00000002";
1	StringTie	exon	6344	7069	1000	-	.	transcript_id "STRG.2.5"; gene_id "STRG.2";
1	StringTie	exon	7157	7232	1000	-	.	transcript_id "STRG.2.5"; gene_id "STRG.2";
1	StringTie	exon	7384	7450	1000	-	.	transcript_id "STRG.2.5"; gene_id "STRG.2";
1	StringTie	exon	7564	7649	1000	-	.	transcript_id "STRG.2.5"; gene_id "STRG.2";
1	StringTie	exon	7762	7835	1000	-	.	transcript_id "STRG.2.5"; gene_id "STRG.2";
1	StringTie	exon	7942	8325	1000	-	.	transcript_id "STRG.2.5"; gene_id "STRG.2";
1	StringTie	exon	8417	8464	1000	-	.	transcript_id "STRG.2.5"; gene_id "STRG.2";
1	StringTie	exon	8571	13173	1000	-	.	transcript_id "STRG.2.5"; gene_id "STRG.2";
1	StringTie	exon	13335	13621	1000	-	.	transcript_id "STRG.2.5"; gene_id "STRG.2";
1	StringTie	CDS	11864	12940	.	-	0	transcript_id "STRG.2.5"; gene_id "STRG.2";
1	Araport11	transcript	6788	8737	.	-	.	transcript_id "AT1G01020.2"; gene_id "AT1G01020"; locus "RLOC_00000002";
1	Araport11	exon	6788	7069	.	-	.	transcript_id "AT1G01020.2"; gene_id "AT1G01020";
1	Araport11	exon	7157	7450	.	-	.	transcript_id "AT1G01020.2"; gene_id "AT1G01020";
1	Araport11	exon	7564	7649	.	-	.	transcript_id "AT1G01020.2"; gene_id "AT1G01020";
1	Araport11	exon	7762	7835	.	-	.	transcript_id "AT1G01020.2"; gene_id "AT1G01020";
1	Araport11	exon	7942	7987	.	-	.	transcript_id "AT1G01020.2"; gene_id "AT1G01020";
1	Araport11	exon	8236	8325	.	-	.	transcript_id "AT1G01020.2"; gene_id "AT1G01020";
1	Araport11	exon	8417	8464	.	-	.	transcript_id "AT1G01020.2"; gene_id "AT1G01020";
1	Araport11	exon	8571	8737	.	-	.	transcript_id "AT1G01020.2"; gene_id "AT1G01020";
1	Araport11	CDS	7315	7450	.	-	1	transcript_id "AT1G01020.2"; gene_id "AT1G01020";
1	Araport11	CDS	7564	7649	.	-	0	transcript_id "AT1G01020.2"; gene_id "AT1G01020";
1	Araport11	CDS	7762	7835	.	-	2	transcript_id "AT1G01020.2"; gene_id "AT1G01020";
1	Araport11	CDS	7942	7987	.	-	0	transcript_id "AT1G01020.2"; gene_id "AT1G01020";
1	Araport11	CDS	8236	8325	.	-	0	transcript_id "AT1G01020.2"; gene_id "AT1G01020";
1	Araport11	CDS	8417	8464	.	-	0	transcript_id "AT1G01020.2"; gene_id "AT1G01020";
1	Araport11	CDS	8571	8666	.	-	0	transcript_id "AT1G01020.2"; gene_id "AT1G01020";
1	Araport11	transcript	6788	8737	.	-	.	transcript_id "AT1G01020.6"; gene_id "AT1G01020"; locus "RLOC_00000002";
1	Araport11	exon	6788	7069	.	-	.	transcript_id "AT1G01020.6"; gene_id "AT1G01020";
1	Araport11	exon	7157	7450	.	-	.	transcript_id "AT1G01020.6"; gene_id "AT1G01020";
1	Araport11	exon	7564	7649	.	-	.	transcript_id "AT1G01020.6"; gene_id "AT1G01020";
1	Araport11	exon	8236	8325	.	-	.	transcript_id "AT1G01020.6"; gene_id "AT1G01020";
1	Araport11	exon	8417	8464	.	-	.	transcript_id "AT1G01020.6"; gene_id "AT1G01020";
1	Araport11	exon	8594	8737	.	-	.	transcript_id "AT1G01020.6"; gene_id "AT1G01020";
1	Araport11	CDS	7315	7450	.	-	1	transcript_id "AT1G01020.6"; gene_id "AT1G01020";
1	Araport11	CDS	7564	7649	.	-	0	transcript_id "AT1G01020.6"; gene_id "AT1G01020";
1	Araport11	CDS	8236	8325	.	-	0	transcript_id "AT1G01020.6"; gene_id "AT1G01020";
1	Araport11	CDS	8417	8419	.	-	0	transcript_id "AT1G01020.6"; gene_id "AT1G01020";
1	Araport11	transcript	6788	9130	.	-	.	transcript_id "AT1G01020.3"; gene_id "AT1G01020"; locus "RLOC_00000002";
1	Araport11	exon	6788	7069	.	-	.	transcript_id "AT1G01020.3"; gene_id "AT1G01020";
1	Araport11	exon	7157	7232	.	-	.	transcript_id "AT1G01020.3"; gene_id "AT1G01020";
1	Araport11	exon	7384	7450	.	-	.	transcript_id "AT1G01020.3"; gene_id "AT1G01020";
1	Araport11	exon	7564	7649	.	-	.	transcript_id "AT1G01020.3"; gene_id "AT1G01020";
1	Araport11	exon	7762	7835	.	-	.	transcript_id "AT1G01020.3"; gene_id "AT1G01020";
1	Araport11	exon	7942	7987	.	-	.	transcript_id "AT1G01020.3"; gene_id "AT1G01020";
1	Araport11	exon	8236	8464	.	-	.	transcript_id "AT1G01020.3"; gene_id "AT1G01020";
1	Araport11	exon	8571	9130	.	-	.	transcript_id "AT1G01020.3"; gene_id "AT1G01020";
1	Araport11	CDS	6915	7069	.	-	2	transcript_id "AT1G01020.3"; gene_id "AT1G01020";
1	Araport11	CDS	7157	7232	.	-	0	transcript_id "AT1G01020.3"; gene_id "AT1G01020";
1	Araport11	CDS	7384	7450	.	-	1	transcript_id "AT1G01020.3"; gene_id "AT1G01020";
1	Araport11	CDS	7564	7649	.	-	0	transcript_id "AT1G01020.3"; gene_id "AT1G01020";
1	Araport11	CDS	7762	7835	.	-	2	transcript_id "AT1G01020.3"; gene_id "AT1G01020";
1	Araport11	CDS	7942	7987	.	-	0	transcript_id "AT1G01020.3"; gene_id "AT1G01020";
1	Araport11	CDS	8236	8442	.	-	0	transcript_id "AT1G01020.3"; gene_id "AT1G01020";
1	Araport11	transcript	6788	9130	.	-	.	transcript_id "AT1G01020.4"; gene_id "AT1G01020"; locus "RLOC_00000002";
1	Araport11	exon	6788	7069	.	-	.	transcript_id "AT1G01020.4"; gene_id "AT1G01020";
1	Araport11	exon	7157	7232	.	-	.	transcript_id "AT1G01020.4"; gene_id "AT1G01020";
1	Araport11	exon	7384	7450	.	-	.	transcript_id "AT1G01020.4"; gene_id "AT1G01020";
1	Araport11	exon	7564	7649	.	-	.	transcript_id "AT1G01020.4"; gene_id "AT1G01020";
1	Araport11	exon	7762	7835	.	-	.	transcript_id "AT1G01020.4"; gene_id "AT1G01020";
1	Araport11	exon	7942	7987	.	-	.	transcript_id "AT1G01020.4"; gene_id "AT1G01020";
1	Araport11	exon	8236	8464	.	-	.	transcript_id "AT1G01020.4"; gene_id "AT1G01020";
1	Araport11	exon	8594	9130	.	-	.	transcript_id "AT1G01020.4"; gene_id "AT1G01020";
1	Araport11	CDS	6915	7069	.	-	2	transcript_id "AT1G01020.4"; gene_id "AT1G01020";
1	Araport11	CDS	7157	7232	.	-	0	transcript_id "AT1G01020.4"; gene_id "AT1G01020";
1	Araport11	CDS	7384	7450	.	-	1	transcript_id "AT1G01020.4"; gene_id "AT1G01020";
1	Araport11	CDS	7564	7649	.	-	0	transcript_id "AT1G01020.4"; gene_id "AT1G01020";
1	Araport11	CDS	7762	7835	.	-	2	transcript_id "AT1G01020.4"; gene_id "AT1G01020";
1	Araport11	CDS	7942	7987	.	-	0	transcript_id "AT1G01020.4"; gene_id "AT1G01020";
1	Araport11	CDS	8236	8442	.	-	0	transcript_id "AT1G01020.4"; gene_id "AT1G01020";
1	Araport11	transcript	6788	9130	.	-	.	transcript_id "AT1G01020.5"; gene_id "AT1G01020"; locus "RLOC_00000002";
1	Araport11	exon	6788	7069	.	-	.	transcript_id "AT1G01020.5"; gene_id "AT1G01020";
1	Araport11	exon	7157	7232	.	-	.	transcript_id "AT1G01020.5"; gene_id "AT1G01020";
1	Araport11	exon	7384	7450	.	-	.	transcript_id "AT1G01020.5"; gene_id "AT1G01020";
1	Araport11	exon	7564	7649	.	-	.	transcript_id "AT1G01020.5"; gene_id "AT1G01020";
1	Araport11	exon	7762	7835	.	-	.	transcript_id "AT1G01020.5"; gene_id "AT1G01020";
1	Araport11	exon	7942	7987	.	-	.	transcript_id "AT1G01020.5"; gene_id "AT1G01020";
1	Araport11	exon	8236	8325	.	-	.	transcript_id "AT1G01020.5"; gene_id "AT1G01020";
1	Araport11	exon	8417	8464	.	-	.	transcript_id "AT1G01020.5"; gene_id "AT1G01020";
1	Araport11	exon	8594	9130	.	-	.	transcript_id "AT1G01020.5"; gene_id "AT1G01020";
1	Araport11	CDS	6915	7069	.	-	2	transcript_id "AT1G01020.5"; gene_id "AT1G01020";
1	Araport11	CDS	7157	7232	.	-	0	transcript_id "AT1G01020.5"; gene_id "AT1G01020";
1	Araport11	CDS	7384	7450	.	-	1	transcript_id "AT1G01020.5"; gene_id "AT1G01020";
1	Araport11	CDS	7564	7649	.	-	0	transcript_id "AT1G01020.5"; gene_id "AT1G01020";
1	Araport11	CDS	7762	7835	.	-	2	transcript_id "AT1G01020.5"; gene_id "AT1G01020";
1	Araport11	CDS	7942	7987	.	-	0	transcript_id "AT1G01020.5"; gene_id "AT1G01020";
1	Araport11	CDS	8236	8325	.	-	0	transcript_id "AT1G01020.5"; gene_id "AT1G01020";
1	Araport11	CDS	8417	8419	.	-	0	transcript_id "AT1G01020.5"; gene_id "AT1G01020";
1	Araport11	transcript	11649	13714	.	-	.	transcript_id "AT1G01030.2"; gene_id "AT1G01030"; locus "RLOC_00000002";
1	Araport11	exon	11649	12354	.	-	.	transcript_id "AT1G01030.2"; gene_id "AT1G01030";
1	Araport11	exon	12424	13173	.	-	.	transcript_id "AT1G01030.2"; gene_id "AT1G01030";
1	Araport11	exon	13335	13714	.	-	.	transcript_id "AT1G01030.2"; gene_id "AT1G01030";
1	Araport11	CDS	11864	12354	.	-	2	transcript_id "AT1G01030.2"; gene_id "AT1G01030";
1	Araport11	CDS	12424	12940	.	-	0	transcript_id "AT1G01030.2"; gene_id "AT1G01030";
1	Araport11	transcript	11101	11372	.	+	.	transcript_id "AT1G03987.1"; gene_id "AT1G03987"; locus "RLOC_00000003";
1	Araport11	exon	11101	11372	.	+	.	transcript_id "AT1G03987.1"; gene_id "AT1G03987";
1	StringTie	transcript	23140	31249	1000	+	.	transcript_id "STRG.4.1"; gene_id "STRG.4"; locus "RLOC_00000004";
1	StringTie	exon	23140	24451	1000	+	.	transcript_id "STRG.4.1"; gene_id "STRG.4";
1	StringTie	exon	24542	24655	1000	+	.	transcript_id "STRG.4.1"; gene_id "STRG.4";
1	StringTie	exon	24752	24962	1000	+	.	transcript_id "STRG.4.1"; gene_id "STRG.4";
1	StringTie	exon	25041	25435	1000	+	.	transcript_id "STRG.4.1"; gene_id "STRG.4";
1	StringTie	exon	25524	25743	1000	+	.	transcript_id "STRG.4.1"; gene_id "STRG.4";
1	StringTie	exon	25825	25997	1000	+	.	transcript_id "STRG.4.1"; gene_id "STRG.4";
1	StringTie	exon	26081	26203	1000	+	.	transcript_id "STRG.4.1"; gene_id "STRG.4";
1	StringTie	exon	26292	26452	1000	+	.	transcript_id "STRG.4.1"; gene_id "STRG.4";
1	StringTie	exon	26543	26776	1000	+	.	transcript_id "STRG.4.1"; gene_id "STRG.4";
1	StringTie	exon	26862	27012	1000	+	.	transcript_id "STRG.4.1"; gene_id "STRG.4";
1	StringTie	exon	27099	27281	1000	+	.	transcript_id "STRG.4.1"; gene_id "STRG.4";
1	StringTie	exon	27372	27533	1000	+	.	transcript_id "STRG.4.1"; gene_id "STRG.4";
1	StringTie	exon	27618	27713	1000	+	.	transcript_id "STRG.4.1"; gene_id "STRG.4";
1	StringTie	exon	27803	28431	1000	+	.	transcript_id "STRG.4.1"; gene_id "STRG.4";
1	StringTie	exon	28708	28805	1000	+	.	transcript_id "STRG.4.1"; gene_id "STRG.4";
1	StringTie	exon	28890	29080	1000	+	.	transcript_id "STRG.4.1"; gene_id "STRG.4";
1	StringTie	exon	29160	30065	1000	+	.	transcript_id "STRG.4.1"; gene_id "STRG.4";
1	StringTie	exon	30147	30311	1000	+	.	transcript_id "STRG.4.1"; gene_id "STRG.4";
1	StringTie	exon	30410	30816	1000	+	.	transcript_id "STRG.4.1"; gene_id "STRG.4";
1	StringTie	exon	30902	31249	1000	+	.	transcript_id "STRG.4.1"; gene_id "STRG.4";
1	StringTie	CDS	23519	24451	.	+	0	transcript_id "STRG.4.1"; gene_id "STRG.4";
1	StringTie	CDS	24542	24655	.	+	0	transcript_id "STRG.4.1"; gene_id "STRG.4";
1	StringTie	CDS	24752	24962	.	+	0	transcript_id "STRG.4.1"; gene_id "STRG.4";
1	StringTie	CDS	25041	25435	.	+	2	transcript_id "STRG.4.1"; gene_id "STRG.4";
1	StringTie	CDS	25524	25743	.	+	0	transcript_id "STRG.4.1"; gene_id "STRG.4";
1	StringTie	CDS	25825	25997	.	+	2	transcript_id "STRG.4.1"; gene_id "STRG.4";
1	StringTie	CDS	26081	26203	.	+	0	transcript_id "STRG.4.1"; gene_id "STRG.4";
1	StringTie	CDS	26292	26452	.	+	0	transcript_id "STRG.4.1"; gene_id "STRG.4";
1	StringTie	CDS	26543	26776	.	+	1	transcript_id "STRG.4.1"; gene_id "STRG.4";
1	StringTie	CDS	26862	27012	.	+	1	transcript_id "STRG.4.1"; gene_id "STRG.4";
1	StringTie	CDS	27099	27281	.	+	0	transcript_id "STRG.4.1"; gene_id "STRG.4";
1	StringTie	CDS	27372	27533	.	+	0	transcript_id "STRG.4.1"; gene_id "STRG.4";
1	StringTie	CDS	27618	27713	.	+	0	transcript_id "STRG.4.1"; gene_id "STRG.4";
1	StringTie	CDS	27803	28431	.	+	0	transcript_id "STRG.4.1"; gene_id "STRG.4";
1	StringTie	CDS	28708	28805	.	+	1	transcript_id "STRG.4.1"; gene_id "STRG.4";
1	StringTie	CDS	28890	29080	.	+	2	transcript_id "STRG.4.1"; gene_id "STRG.4";
1	StringTie	CDS	29160	30065	.	+	0	transcript_id "STRG.4.1"; gene_id "STRG.4";
1	StringTie	CDS	30147	30311	.	+	0	transcript_id "STRG.4.1"; gene_id "STRG.4";
1	StringTie	CDS	30410	30816	.	+	0	transcript_id "STRG.4.1"; gene_id "STRG.4";
1	StringTie	CDS	30902	31079	.	+	1	transcript_id "STRG.4.1"; gene_id "STRG.4";
1	StringTie	transcript	23140	31249	1000	+	.	transcript_id "STRG.4.2"; gene_id "STRG.4"; locus "RLOC_00000004";
1	StringTie	exon	23140	24451	1000	+	.	transcript_id "STRG.4.2"; gene_id "STRG.4";
1	StringTie	exon	24542	24655	1000	+	.	transcript_id "STRG.4.2"; gene_id "STRG.4";
1	StringTie	exon	24752	24962	1000	+	.	transcript_id "STRG.4.2"; gene_id "STRG.4";
1	StringTie	exon	25041	25435	1000	+	.	transcript_id "STRG.4.2"; gene_id "STRG.4";
1	StringTie	exon	25524	25743	1000	+	.	transcript_id "STRG.4.2"; gene_id "STRG.4";
1	StringTie	exon	25825	25997	1000	+	.	transcript_id "STRG.4.2"; gene_id "STRG.4";
1	StringTie	exon	26081	26203	1000	+	.	transcript_id "STRG.4.2"; gene_id "STRG.4";
1	StringTie	exon	26292	26452	1000	+	.	transcript_id "STRG.4.2"; gene_id "STRG.4";
1	StringTie	exon	26543	26776	1000	+	.	transcript_id "STRG.4.2"; gene_id "STRG.4";
1	StringTie	exon	26862	27012	1000	+	.	transcript_id "STRG.4.2"; gene_id "STRG.4";
1	StringTie	exon	27099	27281	1000	+	.	transcript_id "STRG.4.2"; gene_id "STRG.4";
1	StringTie	exon	27372	27533	1000	+	.	transcript_id "STRG.4.2"; gene_id "STRG.4";
1	StringTie	exon	27618	27713	1000	+	.	transcript_id "STRG.4.2"; gene_id "STRG.4";
1	StringTie	exon	27803	28805	1000	+	.	transcript_id "STRG.4.2"; gene_id "STRG.4";
1	StringTie	exon	28890	29080	1000	+	.	transcript_id "STRG.4.2"; gene_id "STRG.4";
1	StringTie	exon	29160	30065	1000	+	.	transcript_id "STRG.4.2"; gene_id "STRG.4";
1	StringTie	exon	30147	30311	1000	+	.	transcript_id "STRG.4.2"; gene_id "STRG.4";
1	StringTie	exon	30410	30816	1000	+	.	transcript_id "STRG.4.2"; gene_id "STRG.4";
1	StringTie	exon	30902	31249	1000	+	.	transcript_id "STRG.4.2"; gene_id "STRG.4";
1	Araport11	transcript	23416	31120	.	+	.	transcript_id "AT1G01040.2"; gene_id "AT1G01040"; locus "RLOC_00000004";
1	Araport11	exon	23416	24451	.	+	.	transcript_id "AT1G01040.2"; gene_id "AT1G01040";
1	Araport11	exon	24542	24655	.	+	.	transcript_id "AT1G01040.2"; gene_id "AT1G01040";
1	Araport11	exon	24752	24962	.	+	.	transcript_id "AT1G01040.2"; gene_id "AT1G01040";
1	Araport11	exon	25041	25435	.	+	.	transcript_id "AT1G01040.2"; gene_id "AT1G01040";
1	Araport11	exon	25524	25743	.	+	.	transcript_id "AT1G01040.2"; gene_id "AT1G01040";
1	Araport11	exon	25825	25997	.	+	.	transcript_id "AT1G01040.2"; gene_id "AT1G01040";
1	Araport11	exon	26081	26203	.	+	.	transcript_id "AT1G01040.2"; gene_id "AT1G01040";
1	Araport11	exon	26292	26452	.	+	.	transcript_id "AT1G01040.2"; gene_id "AT1G01040";
1	Araport11	exon	26543	26776	.	+	.	transcript_id "AT1G01040.2"; gene_id "AT1G01040";
1	Araport11	exon	26862	27012	.	+	.	transcript_id "AT1G01040.2"; gene_id "AT1G01040";
1	Araport11	exon	27099	27281	.	+	.	transcript_id "AT1G01040.2"; gene_id "AT1G01040";
1	Araport11	exon	27372	27536	.	+	.	transcript_id "AT1G01040.2"; gene_id "AT1G01040";
1	Araport11	exon	27618	27713	.	+	.	transcript_id "AT1G01040.2"; gene_id "AT1G01040";
1	Araport11	exon	27803	28431	.	+	.	transcript_id "AT1G01040.2"; gene_id "AT1G01040";
1	Araport11	exon	28708	28805	.	+	.	transcript_id "AT1G01040.2"; gene_id "AT1G01040";
1	Araport11	exon	28890	29080	.	+	.	transcript_id "AT1G01040.2"; gene_id "AT1G01040";
1	Araport11	exon	29160	30065	.	+	.	transcript_id "AT1G01040.2"; gene_id "AT1G01040";
1	Araport11	exon	30147	30311	.	+	.	transcript_id "AT1G01040.2"; gene_id "AT1G01040";
1	Araport11	exon	30410	30816	.	+	.	transcript_id "AT1G01040.2"; gene_id "AT1G01040";
1	Araport11	exon	30902	31120	.	+	.	transcript_id "AT1G01040.2"; gene_id "AT1G01040";
1	Araport11	CDS	23519	24451	.	+	0	transcript_id "AT1G01040.2"; gene_id "AT1G01040";
1	Araport11	CDS	24542	24655	.	+	0	transcript_id "AT1G01040.2"; gene_id "AT1G01040";
1	Araport11	CDS	24752	24962	.	+	0	transcript_id "AT1G01040.2"; gene_id "AT1G01040";
1	Araport11	CDS	25041	25435	.	+	2	transcript_id "AT1G01040.2"; gene_id "AT1G01040";
1	Araport11	CDS	25524	25743	.	+	0	transcript_id "AT1G01040.2"; gene_id "AT1G01040";
1	Araport11	CDS	25825	25997	.	+	2	transcript_id "AT1G01040.2"; gene_id "AT1G01040";
1	Araport11	CDS	26081	26203	.	+	0	transcript_id "AT1G01040.2"; gene_id "AT1G01040";
1	Araport11	CDS	26292	26452	.	+	0	transcript_id "AT1G01040.2"; gene_id "AT1G01040";
1	Araport11	CDS	26543	26776	.	+	1	transcript_id "AT1G01040.2"; gene_id "AT1G01040";
1	Araport11	CDS	26862	27012	.	+	1	transcript_id "AT1G01040.2"; gene_id "AT1G01040";
1	Araport11	CDS	27099	27281	.	+	0	transcript_id "AT1G01040.2"; gene_id "AT1G01040";
1	Araport11	CDS	27372	27536	.	+	0	transcript_id "AT1G01040.2"; gene_id "AT1G01040";
1	Araport11	CDS	27618	27713	.	+	0	transcript_id "AT1G01040.2"; gene_id "AT1G01040";
1	Araport11	CDS	27803	28431	.	+	0	transcript_id "AT1G01040.2"; gene_id "AT1G01040";
1	Araport11	CDS	28708	28805	.	+	1	transcript_id "AT1G01040.2"; gene_id "AT1G01040";
1	Araport11	CDS	28890	29080	.	+	2	transcript_id "AT1G01040.2"; gene_id "AT1G01040";
1	Araport11	CDS	29160	30065	.	+	0	transcript_id "AT1G01040.2"; gene_id "AT1G01040";
1	Araport11	CDS	30147	30311	.	+	0	transcript_id "AT1G01040.2"; gene_id "AT1G01040";
1	Araport11	CDS	30410	30816	.	+	0	transcript_id "AT1G01040.2"; gene_id "AT1G01040";
1	Araport11	CDS	30902	31079	.	+	1	transcript_id "AT1G01040.2"; gene_id "AT1G01040";
1	StringTie	transcript	25524	31249	1000	+	.	transcript_id "STRG.4.3"; gene_id "STRG.4"; locus "RLOC_00000004";
1	StringTie	exon	25524	25743	1000	+	.	transcript_id "STRG.4.3"; gene_id "STRG.4";
1	StringTie	exon	25825	25997	1000	+	.	transcript_id "STRG.4.3"; gene_id "STRG.4";
1	StringTie	exon	26081	26203	1000	+	.	transcript_id "STRG.4.3"; gene_id "STRG.4";
1	StringTie	exon	26292	26452	1000	+	.	transcript_id "STRG.4.3"; gene_id "STRG.4";
1	StringTie	exon	26543	26776	1000	+	.	transcript_id "STRG.4.3"; gene_id "STRG.4";
1	StringTie	exon	26862	27012	1000	+	.	transcript_id "STRG.4.3"; gene_id "STRG.4";
1	StringTie	exon	27099	27281	1000	+	.	transcript_id "STRG.4.3"; gene_id "STRG.4";
1	StringTie	exon	27372	27713	1000	+	.	transcript_id "STRG.4.3"; gene_id "STRG.4";
1	StringTie	exon	27803	28805	1000	+	.	transcript_id "STRG.4.3"; gene_id "STRG.4";
1	StringTie	exon	28890	29080	1000	+	.	transcript_id "STRG.4.3"; gene_id "STRG.4";
1	StringTie	exon	29160	30065	1000	+	.	transcript_id "STRG.4.3"; gene_id "STRG.4";
1	StringTie	exon	30147	30311	1000	+	.	transcript_id "STRG.4.3"; gene_id "STRG.4";
1	StringTie	exon	30410	30816	1000	+	.	transcript_id "STRG.4.3"; gene_id "STRG.4";
1	StringTie	exon	30902	31249	1000	+	.	transcript_id "STRG.4.3"; gene_id "STRG.4";
1	Araport11	transcript	23312	24099	.	-	.	transcript_id "AT1G03993.1"; gene_id "AT1G03993"; locus "RLOC_00000005";
1	Araport11	exon	23312	24099	.	-	.	transcript_id "AT1G03993.1"; gene_id "AT1G03993";
1	StringTie	transcript	31116	33315	1000	-	.	transcript_id "STRG.5.1"; gene_id "STRG.5"; locus "RLOC_00000006";
1	StringTie	exon	31116	31424	1000	-	.	transcript_id "STRG.5.1"; gene_id "STRG.5";
1	StringTie	exon	31521	31602	1000	-	.	transcript_id "STRG.5.1"; gene_id "STRG.5";
1	StringTie	exon	31693	31813	1000	-	.	transcript_id "STRG.5.1"; gene_id "STRG.5";
1	StringTie	exon	31933	31998	1000	-	.	transcript_id "STRG.5.1"; gene_id "STRG.5";
1	StringTie	exon	32088	32195	1000	-	.	transcript_id "STRG.5.1"; gene_id "STRG.5";
1	StringTie	exon	32282	32347	1000	-	.	transcript_id "STRG.5.1"; gene_id "STRG.5";
1	StringTie	exon	32431	32459	1000	-	.	transcript_id "STRG.5.1"; gene_id "STRG.5";
1	StringTie	exon	32547	32670	1000	-	.	transcript_id "STRG.5.1"; gene_id "STRG.5";
1	StringTie	exon	33029	33315	1000	-	.	transcript_id "STRG.5.1"; gene_id "STRG.5";
1	StringTie	CDS	31382	31424	.	-	1	transcript_id "STRG.5.1"; gene_id "STRG.5";
1	StringTie	CDS	31521	31602	.	-	2	transcript_id "STRG.5.1"; gene_id "STRG.5";
1	StringTie	CDS	31693	31813	.	-	0	transcript_id "STRG.5.1"; gene_id "STRG.5";
1	StringTie	CDS	31933	31998	.	-	0	transcript_id "STRG.5.1"; gene_id "STRG.5";
1	StringTie	CDS	32088	32195	.	-	0	transcript_id "STRG.5.1"; gene_id "STRG.5";
1	StringTie	CDS	32282	32347	.	-	0	transcript_id "STRG.5.1"; gene_id "STRG.5";
1	StringTie	CDS	32431	32459	.	-	2	transcript_id "STRG.5.1"; gene_id "STRG.5";
1	StringTie	CDS	32547	32670	.	-	0	transcript_id "STRG.5.1"; gene_id "STRG.5";
1	StringTie	transcript	31116	33315	1000	-	.	transcript_id "STRG.5.2"; gene_id "STRG.5"; locus "RLOC_00000006";
1	StringTie	exon	31116	31424	1000	-	.	transcript_id "STRG.5.2"; gene_id "STRG.5";
1	StringTie	exon	31521	31602	1000	-	.	transcript_id "STRG.5.2"; gene_id "STRG.5";
1	StringTie	exon	31693	31998	1000	-	.	transcript_id "STRG.5.2"; gene_id "STRG.5";
1	StringTie	exon	32088	32195	1000	-	.	transcript_id "STRG.5.2"; gene_id "STRG.5";
1	StringTie	exon	32282	32347	1000	-	.	transcript_id "STRG.5.2"; gene_id "STRG.5";
1	StringTie	exon	32431	32459	1000	-	.	transcript_id "STRG.5.2"; gene_id "STRG.5";
1	StringTie	exon	32547	32670	1000	-	.	transcript_id "STRG.5.2"; gene_id "STRG.5";
1	StringTie	exon	33029	33315	1000	-	.	transcript_id "STRG.5.2"; gene_id "STRG.5";
1	Araport11	transcript	31382	33009	.	-	.	transcript_id "AT1G01050.2"; gene_id "AT1G01050"; locus "RLOC_00000006";
1	Araport11	exon	31382	31424	.	-	.	transcript_id "AT1G01050.2"; gene_id "AT1G01050";
1	Araport11	exon	31521	31602	.	-	.	transcript_id "AT1G01050.2"; gene_id "AT1G01050";
1	Araport11	exon	31693	31813	.	-	.	transcript_id "AT1G01050.2"; gene_id "AT1G01050";
1	Araport11	exon	31933	31998	.	-	.	transcript_id "AT1G01050.2"; gene_id "AT1G01050";
1	Araport11	exon	32088	32195	.	-	.	transcript_id "AT1G01050.2"; gene_id "AT1G01050";
1	Araport11	exon	32282	32347	.	-	.	transcript_id "AT1G01050.2"; gene_id "AT1G01050";
1	Araport11	exon	32431	32459	.	-	.	transcript_id "AT1G01050.2"; gene_id "AT1G01050";
1	Araport11	exon	32547	32670	.	-	.	transcript_id "AT1G01050.2"; gene_id "AT1G01050";
1	Araport11	exon	32839	33009	.	-	.	transcript_id "AT1G01050.2"; gene_id "AT1G01050";
1	Araport11	CDS	31382	31424	.	-	1	transcript_id "AT1G01050.2"; gene_id "AT1G01050";
1	Araport11	CDS	31521	31602	.	-	2	transcript_id "AT1G01050.2"; gene_id "AT1G01050";
1	Araport11	CDS	31693	31813	.	-	0	transcript_id "AT1G01050.2"; gene_id "AT1G01050";
1	Araport11	CDS	31933	31998	.	-	0	transcript_id "AT1G01050.2"; gene_id "AT1G01050";
1	Araport11	CDS	32088	32195	.	-	0	transcript_id "AT1G01050.2"; gene_id "AT1G01050";
1	Araport11	CDS	32282	32347	.	-	0	transcript_id "AT1G01050.2"; gene_id "AT1G01050";
1	Araport11	CDS	32431	32459	.	-	2	transcript_id "AT1G01050.2"; gene_id "AT1G01050";
1	Araport11	CDS	32547	32670	.	-	0	transcript_id "AT1G01050.2"; gene_id "AT1G01050";
1	Araport11	transcript	32727	33009	.	+	.	transcript_id "AT1G03997.1"; gene_id "AT1G03997"; locus "RLOC_00000007";
1	Araport11	exon	32727	33009	.	+	.	transcript_id "AT1G03997.1"; gene_id "AT1G03997";
1	Araport11	transcript	33365	37871	.	-	.	transcript_id "AT1G01060.6"; gene_id "AT1G01060"; locus "RLOC_00000008";
1	Araport11	exon	33365	33589	.	-	.	transcript_id "AT1G01060.6"; gene_id "AT1G01060";
1	Araport11	exon	33981	34327	.	-	.	transcript_id "AT1G01060.6"; gene_id "AT1G01060";
1	Araport11	exon	34401	35474	.	-	.	transcript_id "AT1G01060.6"; gene_id "AT1G01060";
1	Araport11	exon	35567	35647	.	-	.	transcript_id "AT1G01060.6"; gene_id "AT1G01060";
1	Araport11	exon	35730	35999	.	-	.	transcript_id "AT1G01060.6"; gene_id "AT1G01060";
1	Araport11	exon	36090	36171	.	-	.	transcript_id "AT1G01060.6"; gene_id "AT1G01060";
1	Araport11	exon	36624	36685	.	-	.	transcript_id "AT1G01060.6"; gene_id "AT1G01060";
1	Araport11	exon	36810	36921	.	-	.	transcript_id "AT1G01060.6"; gene_id "AT1G01060";
1	Araport11	exon	37023	37203	.	-	.	transcript_id "AT1G01060.6"; gene_id "AT1G01060";
1	Araport11	exon	37373	37871	.	-	.	transcript_id "AT1G01060.6"; gene_id "AT1G01060";
1	Araport11	CDS	33992	34327	.	-	0	transcript_id "AT1G01060.6"; gene_id "AT1G01060";
1	Araport11	CDS	34401	35474	.	-	0	transcript_id "AT1G01060.6"; gene_id "AT1G01060";
1	Araport11	CDS	35567	35647	.	-	0	transcript_id "AT1G01060.6"; gene_id "AT1G01060";
1	Araport11	CDS	35730	35999	.	-	0	transcript_id "AT1G01060.6"; gene_id "AT1G01060";
1	Araport11	CDS	36090	36171	.	-	1	transcript_id "AT1G01060.6"; gene_id "AT1G01060";
1	Araport11	CDS	36624	36685	.	-	0	transcript_id "AT1G01060.6"; gene_id "AT1G01060";
1	Araport11	CDS	36810	36836	.	-	0	transcript_id "AT1G01060.6"; gene_id "AT1G01060";
1	Araport11	transcript	33379	37757	.	-	.	transcript_id "AT1G01060.3"; gene_id "AT1G01060"; locus "RLOC_00000008";
1	Araport11	exon	33379	33589	.	-	.	transcript_id "AT1G01060.3"; gene_id "AT1G01060";
1	Araport11	exon	33981	34327	.	-	.	transcript_id "AT1G01060.3"; gene_id "AT1G01060";
1	Araport11	exon	34401	35474	.	-	.	transcript_id "AT1G01060.3"; gene_id "AT1G01060";
1	Araport11	exon	35567	35647	.	-	.	transcript_id "AT1G01060.3"; gene_id "AT1G01060";
1	Araport11	exon	35730	35963	.	-	.	transcript_id "AT1G01060.3"; gene_id "AT1G01060";
1	Araport11	exon	36624	36685	.	-	.	transcript_id "AT1G01060.3"; gene_id "AT1G01060";
1	Araport11	exon	36810	36921	.	-	.	transcript_id "AT1G01060.3"; gene_id "AT1G01060";
1	Araport11	exon	37023	37203	.	-	.	transcript_id "AT1G01060.3"; gene_id "AT1G01060";
1	Araport11	exon	37373	37398	.	-	.	transcript_id "AT1G01060.3"; gene_id "AT1G01060";
1	Araport11	exon	37569	37757	.	-	.	transcript_id "AT1G01060.3"; gene_id "AT1G01060";
1	Araport11	CDS	33992	34327	.	-	0	transcript_id "AT1G01060.3"; gene_id "AT1G01060";
1	Araport11	CDS	34401	35474	.	-	0	transcript_id "AT1G01060.3"; gene_id "AT1G01060";
1	Araport11	CDS	35567	35647	.	-	0	transcript_id "AT1G01060.3"; gene_id "AT1G01060";
1	Araport11	CDS	35730	35963	.	-	0	transcript_id "AT1G01060.3"; gene_id "AT1G01060";
1	Araport11	CDS	36624	36685	.	-	2	transcript_id "AT1G01060.3"; gene_id "AT1G01060";
1	Araport11	CDS	36810	36921	.	-	0	transcript_id "AT1G01060.3"; gene_id "AT1G01060";
1	Araport11	CDS	37023	37061	.	-	0	transcript_id "AT1G01060.3"; gene_id "AT1G01060";
1	StringTie	transcript	33651	37870	1000	-	.	transcript_id "STRG.6.1"; gene_id "STRG.6"; locus "RLOC_00000008";
1	StringTie	exon	33651	34327	1000	-	.	transcript_id "STRG.6.1"; gene_id "STRG.6";
1	StringTie	exon	34401	35474	1000	-	.	transcript_id "STRG.6.1"; gene_id "STRG.6";
1	StringTie	exon	35567	35647	1000	-	.	transcript_id "STRG.6.1"; gene_id "STRG.6";
1	StringTie	exon	35730	35963	1000	-	.	transcript_id "STRG.6.1"; gene_id "STRG.6";
1	StringTie	exon	36624	36685	1000	-	.	transcript_id "STRG.6.1"; gene_id "STRG.6";
1	StringTie	exon	36810	36921	1000	-	.	transcript_id "STRG.6.1"; gene_id "STRG.6";
1	StringTie	exon	37023	37203	1000	-	.	transcript_id "STRG.6.1"; gene_id "STRG.6";
1	StringTie	exon	37373	37398	1000	-	.	transcript_id "STRG.6.1"; gene_id "STRG.6";
1	StringTie	exon	37569	37870	1000	-	.	transcript_id "STRG.6.1"; gene_id "STRG.6";
1	StringTie	CDS	33992	34327	.	-	0	transcript_id "STRG.6.1"; gene_id "STRG.6";
1	StringTie	CDS	34401	35474	.	-	0	transcript_id "STRG.6.1"; gene_id "STRG.6";
1	StringTie	CDS	35567	35647	.	-	0	transcript_id "STRG.6.1"; gene_id "STRG.6";
1	StringTie	CDS	35730	35963	.	-	0	transcript_id "STRG.6.1"; gene_id "STRG.6";
1	StringTie	CDS	36624	36685	.	-	2	transcript_id "STRG.6.1"; gene_id "STRG.6";
1	StringTie	CDS	36810	36921	.	-	0	transcript_id "STRG.6.1"; gene_id "STRG.6";
1	StringTie	CDS	37023	37061	.	-	0	transcript_id "STRG.6.1"; gene_id "STRG.6";
1	StringTie	transcript	33651	37870	1000	-	.	transcript_id "STRG.6.2"; gene_id "STRG.6"; locus "RLOC_00000008";
1	StringTie	exon	33651	34327	1000	-	.	transcript_id "STRG.6.2"; gene_id "STRG.6";
1	StringTie	exon	34401	35474	1000	-	.	transcript_id "STRG.6.2"; gene_id "STRG.6";
1	StringTie	exon	35567	35647	1000	-	.	transcript_id "STRG.6.2"; gene_id "STRG.6";
1	StringTie	exon	35730	35963	1000	-	.	transcript_id "STRG.6.2"; gene_id "STRG.6";
1	StringTie	exon	36624	36685	1000	-	.	transcript_id "STRG.6.2"; gene_id "STRG.6";
1	StringTie	exon	36810	36921	1000	-	.	transcript_id "STRG.6.2"; gene_id "STRG.6";
1	StringTie	exon	37023	37203	1000	-	.	transcript_id "STRG.6.2"; gene_id "STRG.6";
1	StringTie	exon	37373	37870	1000	-	.	transcript_id "STRG.6.2"; gene_id "STRG.6";
1	StringTie	CDS	33992	34327	.	-	0	transcript_id "STRG.6.2"; gene_id "STRG.6";
1	StringTie	CDS	34401	35474	.	-	0	transcript_id "STRG.6.2"; gene_id "STRG.6";
1	StringTie	CDS	35567	35647	.	-	0	transcript_id "STRG.6.2"; gene_id "STRG.6";
1	StringTie	CDS	35730	35963	.	-	0	transcript_id "STRG.6.2"; gene_id "STRG.6";
1	StringTie	CDS	36624	36685	.	-	2	transcript_id "STRG.6.2"; gene_id "STRG.6";
1	StringTie	CDS	36810	36921	.	-	0	transcript_id "STRG.6.2"; gene_id "STRG.6";
1	StringTie	CDS	37023	37061	.	-	0	transcript_id "STRG.6.2"; gene_id "STRG.6";
1	StringTie	transcript	33651	37870	1000	-	.	transcript_id "STRG.6.3"; gene_id "STRG.6"; locus "RLOC_00000008";
1	StringTie	exon	33651	34327	1000	-	.	transcript_id "STRG.6.3"; gene_id "STRG.6";
1	StringTie	exon	34401	35474	1000	-	.	transcript_id "STRG.6.3"; gene_id "STRG.6";
1	StringTie	exon	35567	35647	1000	-	.	transcript_id "STRG.6.3"; gene_id "STRG.6";
1	StringTie	exon	35730	35963	1000	-	.	transcript_id "STRG.6.3"; gene_id "STRG.6";
1	StringTie	exon	36624	36685	1000	-	.	transcript_id "STRG.6.3"; gene_id "STRG.6";
1	StringTie	exon	36810	36921	1000	-	.	transcript_id "STRG.6.3"; gene_id "STRG.6";
1	StringTie	exon	37023	37398	1000	-	.	transcript_id "STRG.6.3"; gene_id "STRG.6";
1	StringTie	exon	37569	37870	1000	-	.	transcript_id "STRG.6.3"; gene_id "STRG.6";
1	StringTie	CDS	33992	34327	.	-	0	transcript_id "STRG.6.3"; gene_id "STRG.6";
1	StringTie	CDS	34401	35474	.	-	0	transcript_id "STRG.6.3"; gene_id "STRG.6";
1	StringTie	CDS	35567	35647	.	-	0	transcript_id "STRG.6.3"; gene_id "STRG.6";
1	StringTie	CDS	35730	35963	.	-	0	transcript_id "STRG.6.3"; gene_id "STRG.6";
1	StringTie	CDS	36624	36685	.	-	2	transcript_id "STRG.6.3"; gene_id "STRG.6";
1	StringTie	CDS	36810	36921	.	-	0	transcript_id "STRG.6.3"; gene_id "STRG.6";
1	StringTie	CDS	37023	37061	.	-	0	transcript_id "STRG.6.3"; gene_id "STRG.6";
1	StringTie	transcript	33651	37870	1000	-	.	transcript_id "STRG.6.4"; gene_id "STRG.6"; locus "RLOC_00000008";
1	StringTie	exon	33651	34327	1000	-	.	transcript_id "STRG.6.4"; gene_id "STRG.6";
1	StringTie	exon	34401	35474	1000	-	.	transcript_id "STRG.6.4"; gene_id "STRG.6";
1	StringTie	exon	35567	35647	1000	-	.	transcript_id "STRG.6.4"; gene_id "STRG.6";
1	StringTie	exon	35730	35963	1000	-	.	transcript_id "STRG.6.4"; gene_id "STRG.6";
1	StringTie	exon	36624	36685	1000	-	.	transcript_id "STRG.6.4"; gene_id "STRG.6";
1	StringTie	exon	36810	36921	1000	-	.	transcript_id "STRG.6.4"; gene_id "STRG.6";
1	StringTie	exon	37023	37203	1000	-	.	transcript_id "STRG.6.4"; gene_id "STRG.6";
1	StringTie	exon	37302	37398	1000	-	.	transcript_id "STRG.6.4"; gene_id "STRG.6";
1	StringTie	exon	37569	37870	1000	-	.	transcript_id "STRG.6.4"; gene_id "STRG.6";
1	Araport11	transcript	33666	37780	.	-	.	transcript_id "AT1G01060.4"; gene_id "AT1G01060"; locus "RLOC_00000008";
1	Araport11	exon	33666	34327	.	-	.	transcript_id "AT1G01060.4"; gene_id "AT1G01060";
1	Araport11	exon	34401	35471	.	-	.	transcript_id "AT1G01060.4"; gene_id "AT1G01060";
1	Araport11	exon	35567	35647	.	-	.	transcript_id "AT1G01060.4"; gene_id "AT1G01060";
1	Araport11	exon	35730	35963	.	-	.	transcript_id "AT1G01060.4"; gene_id "AT1G01060";
1	Araport11	exon	36624	36685	.	-	.	transcript_id "AT1G01060.4"; gene_id "AT1G01060";
1	Araport11	exon	36810	36921	.	-	.	transcript_id "AT1G01060.4"; gene_id "AT1G01060";
1	Araport11	exon	37023	37203	.	-	.	transcript_id "AT1G01060.4"; gene_id "AT1G01060";
1	Araport11	exon	37373	37398	.	-	.	transcript_id "AT1G01060.4"; gene_id "AT1G01060";
1	Araport11	exon	37569	37780	.	-	.	transcript_id "AT1G01060.4"; gene_id "AT1G01060";
1	Araport11	CDS	33992	34327	.	-	0	transcript_id "AT1G01060.4"; gene_id "AT1G01060";
1	Araport11	CDS	34401	35471	.	-	0	transcript_id "AT1G01060.4"; gene_id "AT1G01060";
1	Araport11	CDS	35567	35647	.	-	0	transcript_id "AT1G01060.4"; gene_id "AT1G01060";
1	Araport11	CDS	35730	35963	.	-	0	transcript_id "AT1G01060.4"; gene_id "AT1G01060";
1	Araport11	CDS	36624	36685	.	-	2	transcript_id "AT1G01060.4"; gene_id "AT1G01060";
1	Araport11	CDS	36810	36921	.	-	0	transcript_id "AT1G01060.4"; gene_id "AT1G01060";
1	Araport11	CDS	37023	37061	.	-	0	transcript_id "AT1G01060.4"; gene_id "AT1G01060";
1	Araport11	transcript	33967	37871	.	-	.	transcript_id "AT1G01060.5"; gene_id "AT1G01060"; locus "RLOC_00000008";
1	Araport11	exon	33967	34327	.	-	.	transcript_id "AT1G01060.5"; gene_id "AT1G01060";
1	Araport11	exon	34401	35474	.	-	.	transcript_id "AT1G01060.5"; gene_id "AT1G01060";
1	Araport11	exon	35567	35647	.	-	.	transcript_id "AT1G01060.5"; gene_id "AT1G01060";
1	Araport11	exon	35730	35999	.	-	.	transcript_id "AT1G01060.5"; gene_id "AT1G01060";
1	Araport11	exon	36090	36171	.	-	.	transcript_id "AT1G01060.5"; gene_id "AT1G01060";
1	Araport11	exon	36624	36685	.	-	.	transcript_id "AT1G01060.5"; gene_id "AT1G01060";
1	Araport11	exon	36810	36921	.	-	.	transcript_id "AT1G01060.5"; gene_id "AT1G01060";
1	Araport11	exon	37023	37203	.	-	.	transcript_id "AT1G01060.5"; gene_id "AT1G01060";
1	Araport11	exon	37373	37871	.	-	.	transcript_id "AT1G01060.5"; gene_id "AT1G01060";
1	Araport11	CDS	33992	34327	.	-	0	transcript_id "AT1G01060.5"; gene_id "AT1G01060";
1	Araport11	CDS	34401	35474	.	-	0	transcript_id "AT1G01060.5"; gene_id "AT1G01060";
1	Araport11	CDS	35567	35647	.	-	0	transcript_id "AT1G01060.5"; gene_id "AT1G01060";
1	Araport11	CDS	35730	35999	.	-	0	transcript_id "AT1G01060.5"; gene_id "AT1G01060";
1	Araport11	CDS	36090	36171	.	-	1	transcript_id "AT1G01060.5"; gene_id "AT1G01060";
1	Araport11	CDS	36624	36685	.	-	0	transcript_id "AT1G01060.5"; gene_id "AT1G01060";
1	Araport11	CDS	36810	36836	.	-	0	transcript_id "AT1G01060.5"; gene_id "AT1G01060";
1	Araport11	transcript	38444	41017	.	-	.	transcript_id "AT1G01070.1"; gene_id "AT1G01070"; locus "RLOC_00000009";
1	Araport11	exon	38444	39054	.	-	.	transcript_id "AT1G01070.1"; gene_id "AT1G01070";
1	Araport11	exon	39136	39287	.	-	.	transcript_id "AT1G01070.1"; gene_id "AT1G01070";
1	Araport11	exon	39409	39814	.	-	.	transcript_id "AT1G01070.1"; gene_id "AT1G01070";
1	Araport11	exon	40213	40329	.	-	.	transcript_id "AT1G01070.1"; gene_id "AT1G01070";
1	Araport11	exon	40473	40535	.	-	.	transcript_id "AT1G01070.1"; gene_id "AT1G01070";
1	Araport11	exon	40675	41017	.	-	.	transcript_id "AT1G01070.1"; gene_id "AT1G01070";
1	Araport11	CDS	38898	39054	.	-	1	transcript_id "AT1G01070.1"; gene_id "AT1G01070";
1	Araport11	CDS	39136	39287	.	-	0	transcript_id "AT1G01070.1"; gene_id "AT1G01070";
1	Araport11	CDS	39409	39814	.	-	1	transcript_id "AT1G01070.1"; gene_id "AT1G01070";
1	Araport11	CDS	40213	40329	.	-	1	transcript_id "AT1G01070.1"; gene_id "AT1G01070";
1	Araport11	CDS	40473	40535	.	-	1	transcript_id "AT1G01070.1"; gene_id "AT1G01070";
1	Araport11	CDS	40675	40877	.	-	0	transcript_id "AT1G01070.1"; gene_id "AT1G01070";
1	StringTie	transcript	38704	40934	1000	-	.	transcript_id "STRG.3.2"; gene_id "STRG.3"; locus "RLOC_00000009";
1	StringTie	exon	38704	39054	1000	-	.	transcript_id "STRG.3.2"; gene_id "STRG.3";
1	StringTie	exon	39136	39287	1000	-	.	transcript_id "STRG.3.2"; gene_id "STRG.3";
1	StringTie	exon	39409	39814	1000	-	.	transcript_id "STRG.3.2"; gene_id "STRG.3";
1	StringTie	exon	40213	40329	1000	-	.	transcript_id "STRG.3.2"; gene_id "STRG.3";
1	StringTie	exon	40473	40934	1000	-	.	transcript_id "STRG.3.2"; gene_id "STRG.3";
1	StringTie	CDS	38898	39054	.	-	1	transcript_id "STRG.3.2"; gene_id "STRG.3";
1	StringTie	CDS	39136	39287	.	-	0	transcript_id "STRG.3.2"; gene_id "STRG.3";
1	StringTie	CDS	39409	39814	.	-	1	transcript_id "STRG.3.2"; gene_id "STRG.3";
1	StringTie	CDS	40213	40329	.	-	1	transcript_id "STRG.3.2"; gene_id "STRG.3";
1	StringTie	CDS	40473	40597	.	-	0	transcript_id "STRG.3.2"; gene_id "STRG.3";
1	Araport11	transcript	43087	43295	.	-	.	transcript_id "AT1G04003.1"; gene_id "AT1G04003"; locus "RLOC_00000010";
1	Araport11	exon	43087	43295	.	-	.	transcript_id "AT1G04003.1"; gene_id "AT1G04003";
1	StringTie	transcript	44798	46836	1000	-	.	transcript_id "STRG.8.3"; gene_id "STRG.8"; locus "RLOC_00000011";
1	StringTie	exon	44798	45559	1000	-	.	transcript_id "STRG.8.3"; gene_id "STRG.8";
1	StringTie	exon	45646	45954	1000	-	.	transcript_id "STRG.8.3"; gene_id "STRG.8";
1	StringTie	exon	46044	46836	1000	-	.	transcript_id "STRG.8.3"; gene_id "STRG.8";
1	StringTie	transcript	44798	46836	1000	-	.	transcript_id "STRG.8.4"; gene_id "STRG.8"; locus "RLOC_00000011";
1	StringTie	exon	44798	45954	1000	-	.	transcript_id "STRG.8.4"; gene_id "STRG.8";
1	StringTie	exon	46044	46836	1000	-	.	transcript_id "STRG.8.4"; gene_id "STRG.8";
1	Araport11	transcript	44970	47059	.	-	.	transcript_id "AT1G01080.1"; gene_id "AT1G01080"; locus "RLOC_00000011";
1	Araport11	exon	44970	45559	.	-	.	transcript_id "AT1G01080.1"; gene_id "AT1G01080";
1	Araport11	exon	45646	45954	.	-	.	transcript_id "AT1G01080.1"; gene_id "AT1G01080";
1	Araport11	exon	46044	46145	.	-	.	transcript_id "AT1G01080.1"; gene_id "AT1G01080";
1	Araport11	exon	46376	47059	.	-	.	transcript_id "AT1G01080.1"; gene_id "AT1G01080";
1	Araport11	CDS	45503	45559	.	-	0	transcript_id "AT1G01080.1"; gene_id "AT1G01080";
1	Araport11	CDS	45646	45954	.	-	0	transcript_id "AT1G01080.1"; gene_id "AT1G01080";
1	Araport11	CDS	46044	46145	.	-	0	transcript_id "AT1G01080.1"; gene_id "AT1G01080";
1	Araport11	CDS	46376	46789	.	-	0	transcript_id "AT1G01080.1"; gene_id "AT1G01080";
1	Araport11	transcript	44970	47059	.	-	.	transcript_id "AT1G01080.3"; gene_id "AT1G01080"; locus "RLOC_00000011";
1	Araport11	exon	44970	45954	.	-	.	transcript_id "AT1G01080.3"; gene_id "AT1G01080";
1	Araport11	exon	46044	46145	.	-	.	transcript_id "AT1G01080.3"; gene_id "AT1G01080";
1	Araport11	exon	46376	47059	.	-	.	transcript_id "AT1G01080.3"; gene_id "AT1G01080";
1	Araport11	CDS	45610	45954	.	-	0	transcript_id "AT1G01080.3"; gene_id "AT1G01080";
1	Araport11	CDS	46044	46145	.	-	0	transcript_id "AT1G01080.3"; gene_id "AT1G01080";
1	Araport11	CDS	46376	46789	.	-	0	transcript_id "AT1G01080.3"; gene_id "AT1G01080";
1	Araport11	transcript	45296	47019	.	-	.	transcript_id "AT1G01080.2"; gene_id "AT1G01080"; locus "RLOC_00000011";
1	Araport11	exon	45296	45559	.	-	.	transcript_id "AT1G01080.2"; gene_id "AT1G01080";
1	Araport11	exon	45646	45954	.	-	.	transcript_id "AT1G01080.2"; gene_id "AT1G01080";
1	Araport11	exon	46044	46145	.	-	.	transcript_id "AT1G01080.2"; gene_id "AT1G01080";
1	Araport11	exon	46373	47019	.	-	.	transcript_id "AT1G01080.2"; gene_id "AT1G01080";
1	Araport11	CDS	45503	45559	.	-	0	transcript_id "AT1G01080.2"; gene_id "AT1G01080";
1	Araport11	CDS	45646	45954	.	-	0	transcript_id "AT1G01080.2"; gene_id "AT1G01080";
1	Araport11	CDS	46044	46145	.	-	0	transcript_id "AT1G01080.2"; gene_id "AT1G01080";
1	Araport11	CDS	46373	46789	.	-	0	transcript_id "AT1G01080.2"; gene_id "AT1G01080";
1	StringTie	transcript	46966	49306	1000	-	.	transcript_id "STRG.9.1"; gene_id "STRG.9"; locus "RLOC_00000011";
1	StringTie	exon	46966	47982	1000	-	.	transcript_id "STRG.9.1"; gene_id "STRG.9";
1	StringTie	exon	48075	48852	1000	-	.	transcript_id "STRG.9.1"; gene_id "STRG.9";
1	StringTie	exon	48936	49306	1000	-	.	transcript_id "STRG.9.1"; gene_id "STRG.9";
1	StringTie	CDS	47705	47982	.	-	2	transcript_id "STRG.9.1"; gene_id "STRG.9";
1	StringTie	CDS	48075	48852	.	-	0	transcript_id "STRG.9.1"; gene_id "STRG.9";
1	StringTie	CDS	48936	49166	.	-	0	transcript_id "STRG.9.1"; gene_id "STRG.9";
1	Araport11	transcript	49909	51210	.	-	.	transcript_id "AT1G01100.2"; gene_id "AT1G01100"; locus "RLOC_00000012";
1	Araport11	exon	49909	50337	.	-	.	transcript_id "AT1G01100.2"; gene_id "AT1G01100";
1	Araport11	exon	50419	50631	.	-	.	transcript_id "AT1G01100.2"; gene_id "AT1G01100";
1	Araport11	exon	50883	50963	.	-	.	transcript_id "AT1G01100.2"; gene_id "AT1G01100";
1	Araport11	exon	51126	51210	.	-	.	transcript_id "AT1G01100.2"; gene_id "AT1G01100";
1	Araport11	CDS	50284	50337	.	-	0	transcript_id "AT1G01100.2"; gene_id "AT1G01100";
1	Araport11	CDS	50419	50631	.	-	0	transcript_id "AT1G01100.2"; gene_id "AT1G01100";
1	Araport11	CDS	50883	50954	.	-	0	transcript_id "AT1G01100.2"; gene_id "AT1G01100";
1	Araport11	transcript	50090	51108	.	-	.	transcript_id "AT1G01100.1"; gene_id "AT1G01100"; locus "RLOC_00000012";
1	Araport11	exon	50090	50337	.	-	.	transcript_id "AT1G01100.1"; gene_id "AT1G01100";
1	Araport11	exon	50419	50631	.	-	.	transcript_id "AT1G01100.1"; gene_id "AT1G01100";
1	Araport11	exon	50883	50963	.	-	.	transcript_id "AT1G01100.1"; gene_id "AT1G01100";
1	Araport11	exon	51064	51108	.	-	.	transcript_id "AT1G01100.1"; gene_id "AT1G01100";
1	Araport11	CDS	50284	50337	.	-	0	transcript_id "AT1G01100.1"; gene_id "AT1G01100";
1	Araport11	CDS	50419	50631	.	-	0	transcript_id "AT1G01100.1"; gene_id "AT1G01100";
1	Araport11	CDS	50883	50954	.	-	0	transcript_id "AT1G01100.1"; gene_id "AT1G01100";
1	Araport11	transcript	50090	51187	.	-	.	transcript_id "AT1G01100.4"; gene_id "AT1G01100"; locus "RLOC_00000012";
1	Araport11	exon	50090	50337	.	-	.	transcript_id "AT1G01100.4"; gene_id "AT1G01100";
1	Araport11	exon	50419	50631	.	-	.	transcript_id "AT1G01100.4"; gene_id "AT1G01100";
1	Araport11	exon	50883	50963	.	-	.	transcript_id "AT1G01100.4"; gene_id "AT1G01100";
1	Araport11	exon	51123	51187	.	-	.	transcript_id "AT1G01100.4"; gene_id "AT1G01100";
1	Araport11	CDS	50284	50337	.	-	0	transcript_id "AT1G01100.4"; gene_id "AT1G01100";
1	Araport11	CDS	50419	50631	.	-	0	transcript_id "AT1G01100.4"; gene_id "AT1G01100";
1	Araport11	CDS	50883	50954	.	-	0	transcript_id "AT1G01100.4"; gene_id "AT1G01100";
1	Araport11	transcript	50090	51197	.	-	.	transcript_id "AT1G01100.3"; gene_id "AT1G01100"; locus "RLOC_00000012";
1	Araport11	exon	50090	50337	.	-	.	transcript_id "AT1G01100.3"; gene_id "AT1G01100";
1	Araport11	exon	50419	50447	.	-	.	transcript_id "AT1G01100.3"; gene_id "AT1G01100";
1	Araport11	exon	50496	50631	.	-	.	transcript_id "AT1G01100.3"; gene_id "AT1G01100";
1	Araport11	exon	50883	50963	.	-	.	transcript_id "AT1G01100.3"; gene_id "AT1G01100";
1	Araport11	exon	51126	51197	.	-	.	transcript_id "AT1G01100.3"; gene_id "AT1G01100";
1	Araport11	CDS	50284	50337	.	-	0	transcript_id "AT1G01100.3"; gene_id "AT1G01100";
1	Araport11	CDS	50419	50447	.	-	2	transcript_id "AT1G01100.3"; gene_id "AT1G01100";
1	Araport11	CDS	50496	50631	.	-	0	transcript_id "AT1G01100.3"; gene_id "AT1G01100";
1	Araport11	CDS	50883	50954	.	-	0	transcript_id "AT1G01100.3"; gene_id "AT1G01100";
1	StringTie	transcript	51938	54750	1000	+	.	transcript_id "STRG.7.1"; gene_id "STRG.7"; locus "RLOC_00000013";
1	StringTie	exon	51938	52346	1000	+	.	transcript_id "STRG.7.1"; gene_id "STRG.7";
1	StringTie	exon	52434	52730	1000	+	.	transcript_id "STRG.7.1"; gene_id "STRG.7";
1	StringTie	exon	52938	53183	1000	+	.	transcript_id "STRG.7.1"; gene_id "STRG.7";
1	StringTie	exon	53484	53624	1000	+	.	transcript_id "STRG.7.1"; gene_id "STRG.7";
1	StringTie	exon	53703	54750	1000	+	.	transcript_id "STRG.7.1"; gene_id "STRG.7";
1	StringTie	CDS	52239	52346	.	+	0	transcript_id "STRG.7.1"; gene_id "STRG.7";
1	StringTie	CDS	52434	52730	.	+	0	transcript_id "STRG.7.1"; gene_id "STRG.7";
1	StringTie	CDS	52938	53183	.	+	0	transcript_id "STRG.7.1"; gene_id "STRG.7";
1	StringTie	CDS	53484	53624	.	+	0	transcript_id "STRG.7.1"; gene_id "STRG.7";
1	StringTie	CDS	53703	54494	.	+	0	transcript_id "STRG.7.1"; gene_id "STRG.7";
1	StringTie	transcript	51938	54750	1000	+	.	transcript_id "STRG.7.2"; gene_id "STRG.7"; locus "RLOC_00000013";
1	StringTie	exon	51938	52346	1000	+	.	transcript_id "STRG.7.2"; gene_id "STRG.7";
1	StringTie	exon	52434	52730	1000	+	.	transcript_id "STRG.7.2"; gene_id "STRG.7";
1	StringTie	exon	52938	53183	1000	+	.	transcript_id "STRG.7.2"; gene_id "STRG.7";
1	StringTie	exon	53484	54750	1000	+	.	transcript_id "STRG.7.2"; gene_id "STRG.7";
1	Araport11	transcript	52061	54689	.	+	.	transcript_id "AT1G01110.1"; gene_id "AT1G01110"; locus "RLOC_00000013";
1	Araport11	exon	52061	52730	.	+	.	transcript_id "AT1G01110.1"; gene_id "AT1G01110";
1	Araport11	exon	52938	53183	.	+	.	transcript_id "AT1G01110.1"; gene_id "AT1G01110";
1	Araport11	exon	53484	53624	.	+	.	transcript_id "AT1G01110.1"; gene_id "AT1G01110";
1	Araport11	exon	53703	54689	.	+	.	transcript_id "AT1G01110.1"; gene_id "AT1G01110";
1	Araport11	CDS	53022	53183	.	+	0	transcript_id "AT1G01110.1"; gene_id "AT1G01110";
1	Araport11	CDS	53484	53624	.	+	0	transcript_id "AT1G01110.1"; gene_id "AT1G01110";
1	Araport11	CDS	53703	54494	.	+	0	transcript_id "AT1G01110.1"; gene_id "AT1G01110";
1	Araport11	transcript	57164	59215	.	-	.	transcript_id "AT1G01120.1"; gene_id "AT1G01120"; locus "RLOC_00000014";
1	Araport11	exon	57164	59215	.	-	.	transcript_id "AT1G01120.1"; gene_id "AT1G01120";
1	Araport11	CDS	57392	58978	.	-	0	transcript_id "AT1G01120.1"; gene_id "AT1G01120";
1	Araport11	transcript	61905	63811	.	-	.	transcript_id "AT1G01130.1"; gene_id "AT1G01130"; locus "RLOC_00000015";
1	Araport11	exon	61905	61949	.	-	.	transcript_id "AT1G01130.1"; gene_id "AT1G01130";
1	Araport11	exon	62050	62124	.	-	.	transcript_id "AT1G01130.1"; gene_id "AT1G01130";
1	Araport11	exon	63557	63811	.	-	.	transcript_id "AT1G01130.1"; gene_id "AT1G01130";
1	Araport11	CDS	61905	61949	.	-	0	transcript_id "AT1G01130.1"; gene_id "AT1G01130";
1	Araport11	CDS	62050	62124	.	-	0	transcript_id "AT1G01130.1"; gene_id "AT1G01130";
1	Araport11	CDS	63557	63811	.	-	0	transcript_id "AT1G01130.1"; gene_id "AT1G01130";
1	StringTie	transcript	62688	67705	1000	-	.	transcript_id "STRG.15.1"; gene_id "STRG.15"; locus "RLOC_00000015";
1	StringTie	exon	62688	62861	1000	-	.	transcript_id "STRG.15.1"; gene_id "STRG.15";
1	StringTie	exon	63365	64475	1000	-	.	transcript_id "STRG.15.1"; gene_id "STRG.15";
1	StringTie	exon	64582	64656	1000	-	.	transcript_id "STRG.15.1"; gene_id "STRG.15";
1	StringTie	exon	64751	64807	1000	-	.	transcript_id "STRG.15.1"; gene_id "STRG.15";
1	StringTie	exon	64901	65017	1000	-	.	transcript_id "STRG.15.1"; gene_id "STRG.15";
1	StringTie	exon	65110	65217	1000	-	.	transcript_id "STRG.15.1"; gene_id "STRG.15";
1	StringTie	exon	65331	65456	1000	-	.	transcript_id "STRG.15.1"; gene_id "STRG.15";
1	StringTie	exon	65563	65652	1000	-	.	transcript_id "STRG.15.1"; gene_id "STRG.15";
1	StringTie	exon	65739	65864	1000	-	.	transcript_id "STRG.15.1"; gene_id "STRG.15";
1	StringTie	exon	66107	66160	1000	-	.	transcript_id "STRG.15.1"; gene_id "STRG.15";
1	StringTie	exon	66262	66342	1000	-	.	transcript_id "STRG.15.1"; gene_id "STRG.15";
1	StringTie	exon	66450	66557	1000	-	.	transcript_id "STRG.15.1"; gene_id "STRG.15";
1	StringTie	exon	66678	66749	1000	-	.	transcript_id "STRG.15.1"; gene_id "STRG.15";
1	StringTie	exon	66835	66897	1000	-	.	transcript_id "STRG.15.1"; gene_id "STRG.15";
1	StringTie	exon	67324	67705	1000	-	.	transcript_id "STRG.15.1"; gene_id "STRG.15";
1	StringTie	CDS	64398	64475	.	-	0	transcript_id "STRG.15.1"; gene_id "STRG.15";
1	StringTie	CDS	64582	64656	.	-	0	transcript_id "STRG.15.1"; gene_id "STRG.15";
1	StringTie	CDS	64751	64807	.	-	0	transcript_id "STRG.15.1"; gene_id "STRG.15";
1	StringTie	CDS	64901	65017	.	-	0	transcript_id "STRG.15.1"; gene_id "STRG.15";
1	StringTie	CDS	65110	65217	.	-	0	transcript_id "STRG.15.1"; gene_id "STRG.15";
1	StringTie	CDS	65331	65456	.	-	0	transcript_id "STRG.15.1"; gene_id "STRG.15";
1	StringTie	CDS	65563	65652	.	-	0	transcript_id "STRG.15.1"; gene_id "STRG.15";
1	StringTie	CDS	65739	65864	.	-	0	transcript_id "STRG.15.1"; gene_id "STRG.15";
1	StringTie	CDS	66107	66160	.	-	0	transcript_id "STRG.15.1"; gene_id "STRG.15";
1	StringTie	CDS	66262	66342	.	-	0	transcript_id "STRG.15.1"; gene_id "STRG.15";
1	StringTie	CDS	66450	66557	.	-	0	transcript_id "STRG.15.1"; gene_id "STRG.15";
1	StringTie	CDS	66678	66749	.	-	0	transcript_id "STRG.15.1"; gene_id "STRG.15";
1	StringTie	CDS	66835	66897	.	-	0	transcript_id "STRG.15.1"; gene_id "STRG.15";
1	StringTie	CDS	67324	67512	.	-	0	transcript_id "STRG.15.1"; gene_id "STRG.15";
1	StringTie	transcript	63043	67705	1000	-	.	transcript_id "STRG.15.2"; gene_id "STRG.15"; locus "RLOC_00000015";
1	StringTie	exon	63043	64475	1000	-	.	transcript_id "STRG.15.2"; gene_id "STRG.15";
1	StringTie	exon	64582	64656	1000	-	.	transcript_id "STRG.15.2"; gene_id "STRG.15";
1	StringTie	exon	64751	64807	1000	-	.	transcript_id "STRG.15.2"; gene_id "STRG.15";
1	StringTie	exon	64901	65017	1000	-	.	transcript_id "STRG.15.2"; gene_id "STRG.15";
1	StringTie	exon	65110	65217	1000	-	.	transcript_id "STRG.15.2"; gene_id "STRG.15";
1	StringTie	exon	65331	65456	1000	-	.	transcript_id "STRG.15.2"; gene_id "STRG.15";
1	StringTie	exon	65563	65652	1000	-	.	transcript_id "STRG.15.2"; gene_id "STRG.15";
1	StringTie	exon	65739	65864	1000	-	.	transcript_id "STRG.15.2"; gene_id "STRG.15";
1	StringTie	exon	66107	66160	1000	-	.	transcript_id "STRG.15.2"; gene_id "STRG.15";
1	StringTie	exon	66262	66342	1000	-	.	transcript_id "STRG.15.2"; gene_id "STRG.15";
1	StringTie	exon	66450	66557	1000	-	.	transcript_id "STRG.15.2"; gene_id "STRG.15";
1	StringTie	exon	66678	66749	1000	-	.	transcript_id "STRG.15.2"; gene_id "STRG.15";
1	StringTie	exon	66835	66897	1000	-	.	transcript_id "STRG.15.2"; gene_id "STRG.15";
1	StringTie	exon	67324	67705	1000	-	.	transcript_id "STRG.15.2"; gene_id "STRG.15";
1	StringTie	CDS	64398	64475	.	-	0	transcript_id "STRG.15.2"; gene_id "STRG.15";
1	StringTie	CDS	64582	64656	.	-	0	transcript_id "STRG.15.2"; gene_id "STRG.15";
1	StringTie	CDS	64751	64807	.	-	0	transcript_id "STRG.15.2"; gene_id "STRG.15";
1	StringTie	CDS	64901	65017	.	-	0	transcript_id "STRG.15.2"; gene_id "STRG.15";
1	StringTie	CDS	65110	65217	.	-	0	transcript_id "STRG.15.2"; gene_id "STRG.15";
1	StringTie	CDS	65331	65456	.	-	0	transcript_id "STRG.15.2"; gene_id "STRG.15";
1	StringTie	CDS	65563	65652	.	-	0	transcript_id "STRG.15.2"; gene_id "STRG.15";
1	StringTie	CDS	65739	65864	.	-	0	transcript_id "STRG.15.2"; gene_id "STRG.15";
1	StringTie	CDS	66107	66160	.	-	0	transcript_id "STRG.15.2"; gene_id "STRG.15";
1	StringTie	CDS	66262	66342	.	-	0	transcript_id "STRG.15.2"; gene_id "STRG.15";
1	StringTie	CDS	66450	66557	.	-	0	transcript_id "STRG.15.2"; gene_id "STRG.15";
1	StringTie	CDS	66678	66749	.	-	0	transcript_id "STRG.15.2"; gene_id "STRG.15";
1	StringTie	CDS	66835	66897	.	-	0	transcript_id "STRG.15.2"; gene_id "STRG.15";
1	StringTie	CDS	67324	67512	.	-	0	transcript_id "STRG.15.2"; gene_id "STRG.15";
1	StringTie	transcript	63043	67705	1000	-	.	transcript_id "STRG.15.3"; gene_id "STRG.15"; locus "RLOC_00000015";
1	StringTie	exon	63043	64475	1000	-	.	transcript_id "STRG.15.3"; gene_id "STRG.15";
1	StringTie	exon	64582	64656	1000	-	.	transcript_id "STRG.15.3"; gene_id "STRG.15";
1	StringTie	exon	64751	65017	1000	-	.	transcript_id "STRG.15.3"; gene_id "STRG.15";
1	StringTie	exon	65110	65217	1000	-	.	transcript_id "STRG.15.3"; gene_id "STRG.15";
1	StringTie	exon	65331	65456	1000	-	.	transcript_id "STRG.15.3"; gene_id "STRG.15";
1	StringTie	exon	65563	65652	1000	-	.	transcript_id "STRG.15.3"; gene_id "STRG.15";
1	StringTie	exon	65739	65864	1000	-	.	transcript_id "STRG.15.3"; gene_id "STRG.15";
1	StringTie	exon	66107	66160	1000	-	.	transcript_id "STRG.15.3"; gene_id "STRG.15";
1	StringTie	exon	66262	66342	1000	-	.	transcript_id "STRG.15.3"; gene_id "STRG.15";
1	StringTie	exon	66450	66557	1000	-	.	transcript_id "STRG.15.3"; gene_id "STRG.15";
1	StringTie	exon	66678	66749	1000	-	.	transcript_id "STRG.15.3"; gene_id "STRG.15";
1	StringTie	exon	66835	66897	1000	-	.	transcript_id "STRG.15.3"; gene_id "STRG.15";
1	StringTie	exon	67324	67705	1000	-	.	transcript_id "STRG.15.3"; gene_id "STRG.15";
1	Araport11	transcript	64167	67625	.	-	.	transcript_id "AT1G01140.2"; gene_id "AT1G01140"; locus "RLOC_00000015";
1	Araport11	exon	64167	64475	.	-	.	transcript_id "AT1G01140.2"; gene_id "AT1G01140";
1	Araport11	exon	64582	64656	.	-	.	transcript_id "AT1G01140.2"; gene_id "AT1G01140";
1	Araport11	exon	64751	64807	.	-	.	transcript_id "AT1G01140.2"; gene_id "AT1G01140";
1	Araport11	exon	64901	65017	.	-	.	transcript_id "AT1G01140.2"; gene_id "AT1G01140";
1	Araport11	exon	65110	65217	.	-	.	transcript_id "AT1G01140.2"; gene_id "AT1G01140";
1	Araport11	exon	65331	65456	.	-	.	transcript_id "AT1G01140.2"; gene_id "AT1G01140";
1	Araport11	exon	65563	65652	.	-	.	transcript_id "AT1G01140.2"; gene_id "AT1G01140";
1	Araport11	exon	65733	65864	.	-	.	transcript_id "AT1G01140.2"; gene_id "AT1G01140";
1	Araport11	exon	66107	66160	.	-	.	transcript_id "AT1G01140.2"; gene_id "AT1G01140";
1	Araport11	exon	66262	66342	.	-	.	transcript_id "AT1G01140.2"; gene_id "AT1G01140";
1	Araport11	exon	66450	66557	.	-	.	transcript_id "AT1G01140.2"; gene_id "AT1G01140";
1	Araport11	exon	66678	66749	.	-	.	transcript_id "AT1G01140.2"; gene_id "AT1G01140";
1	Araport11	exon	66835	66897	.	-	.	transcript_id "AT1G01140.2"; gene_id "AT1G01140";
1	Araport11	exon	67324	67625	.	-	.	transcript_id "AT1G01140.2"; gene_id "AT1G01140";
1	Araport11	CDS	64398	64475	.	-	0	transcript_id "AT1G01140.2"; gene_id "AT1G01140";
1	Araport11	CDS	64582	64656	.	-	0	transcript_id "AT1G01140.2"; gene_id "AT1G01140";
1	Araport11	CDS	64751	64807	.	-	0	transcript_id "AT1G01140.2"; gene_id "AT1G01140";
1	Araport11	CDS	64901	65017	.	-	0	transcript_id "AT1G01140.2"; gene_id "AT1G01140";
1	Araport11	CDS	65110	65217	.	-	0	transcript_id "AT1G01140.2"; gene_id "AT1G01140";
1	Araport11	CDS	65331	65456	.	-	0	transcript_id "AT1G01140.2"; gene_id "AT1G01140";
1	Araport11	CDS	65563	65652	.	-	0	transcript_id "AT1G01140.2"; gene_id "AT1G01140";
1	Araport11	CDS	65733	65864	.	-	0	transcript_id "AT1G01140.2"; gene_id "AT1G01140";
1	Araport11	CDS	66107	66160	.	-	0	transcript_id "AT1G01140.2"; gene_id "AT1G01140";
1	Araport11	CDS	66262	66342	.	-	0	transcript_id "AT1G01140.2"; gene_id "AT1G01140";
1	Araport11	CDS	66450	66557	.	-	0	transcript_id "AT1G01140.2"; gene_id "AT1G01140";
1	Araport11	CDS	66678	66749	.	-	0	transcript_id "AT1G01140.2"; gene_id "AT1G01140";
1	Araport11	CDS	66835	66897	.	-	0	transcript_id "AT1G01140.2"; gene_id "AT1G01140";
1	Araport11	CDS	67324	67512	.	-	0	transcript_id "AT1G01140.2"; gene_id "AT1G01140";
1	Araport11	transcript	64167	67625	.	-	.	transcript_id "AT1G01140.3"; gene_id "AT1G01140"; locus "RLOC_00000015";
1	Araport11	exon	64167	64475	.	-	.	transcript_id "AT1G01140.3"; gene_id "AT1G01140";
1	Araport11	exon	64570	64656	.	-	.	transcript_id "AT1G01140.3"; gene_id "AT1G01140";
1	Araport11	exon	64751	64807	.	-	.	transcript_id "AT1G01140.3"; gene_id "AT1G01140";
1	Araport11	exon	64901	65017	.	-	.	transcript_id "AT1G01140.3"; gene_id "AT1G01140";
1	Araport11	exon	65110	65217	.	-	.	transcript_id "AT1G01140.3"; gene_id "AT1G01140";
1	Araport11	exon	65331	65456	.	-	.	transcript_id "AT1G01140.3"; gene_id "AT1G01140";
1	Araport11	exon	65563	65652	.	-	.	transcript_id "AT1G01140.3"; gene_id "AT1G01140";
1	Araport11	exon	65739	65864	.	-	.	transcript_id "AT1G01140.3"; gene_id "AT1G01140";
1	Araport11	exon	66107	66160	.	-	.	transcript_id "AT1G01140.3"; gene_id "AT1G01140";
1	Araport11	exon	66262	66342	.	-	.	transcript_id "AT1G01140.3"; gene_id "AT1G01140";
1	Araport11	exon	66450	66557	.	-	.	transcript_id "AT1G01140.3"; gene_id "AT1G01140";
1	Araport11	exon	66678	66749	.	-	.	transcript_id "AT1G01140.3"; gene_id "AT1G01140";
1	Araport11	exon	66835	66897	.	-	.	transcript_id "AT1G01140.3"; gene_id "AT1G01140";
1	Araport11	exon	67324	67625	.	-	.	transcript_id "AT1G01140.3"; gene_id "AT1G01140";
1	Araport11	CDS	64398	64475	.	-	0	transcript_id "AT1G01140.3"; gene_id "AT1G01140";
1	Araport11	CDS	64570	64656	.	-	0	transcript_id "AT1G01140.3"; gene_id "AT1G01140";
1	Araport11	CDS	64751	64807	.	-	0	transcript_id "AT1G01140.3"; gene_id "AT1G01140";
1	Araport11	CDS	64901	65017	.	-	0	transcript_id "AT1G01140.3"; gene_id "AT1G01140";
1	Araport11	CDS	65110	65217	.	-	0	transcript_id "AT1G01140.3"; gene_id "AT1G01140";
1	Araport11	CDS	65331	65456	.	-	0	transcript_id "AT1G01140.3"; gene_id "AT1G01140";
1	Araport11	CDS	65563	65652	.	-	0	transcript_id "AT1G01140.3"; gene_id "AT1G01140";
1	Araport11	CDS	65739	65864	.	-	0	transcript_id "AT1G01140.3"; gene_id "AT1G01140";
1	Araport11	CDS	66107	66160	.	-	0	transcript_id "AT1G01140.3"; gene_id "AT1G01140";
1	Araport11	CDS	66262	66342	.	-	0	transcript_id "AT1G01140.3"; gene_id "AT1G01140";
1	Araport11	CDS	66450	66557	.	-	0	transcript_id "AT1G01140.3"; gene_id "AT1G01140";
1	Araport11	CDS	66678	66749	.	-	0	transcript_id "AT1G01140.3"; gene_id "AT1G01140";
1	Araport11	CDS	66835	66897	.	-	0	transcript_id "AT1G01140.3"; gene_id "AT1G01140";
1	Araport11	CDS	67324	67512	.	-	0	transcript_id "AT1G01140.3"; gene_id "AT1G01140";
1	Araport11	transcript	69911	72138	.	-	.	transcript_id "AT1G01150.1"; gene_id "AT1G01150"; locus "RLOC_00000016";
1	Araport11	exon	69911	70285	.	-	.	transcript_id "AT1G01150.1"; gene_id "AT1G01150";
1	Araport11	exon	70840	70968	.	-	.	transcript_id "AT1G01150.1"; gene_id "AT1G01150";
1	Araport11	exon	71041	71721	.	-	.	transcript_id "AT1G01150.1"; gene_id "AT1G01150";
1	Araport11	exon	71942	72138	.	-	.	transcript_id "AT1G01150.1"; gene_id "AT1G01150";
1	Araport11	CDS	70115	70285	.	-	0	transcript_id "AT1G01150.1"; gene_id "AT1G01150";
1	Araport11	CDS	70840	70968	.	-	0	transcript_id "AT1G01150.1"; gene_id "AT1G01150";
1	Araport11	CDS	71041	71721	.	-	0	transcript_id "AT1G01150.1"; gene_id "AT1G01150";
1	Araport11	CDS	71942	71998	.	-	0	transcript_id "AT1G01150.1"; gene_id "AT1G01150";
1	Araport11	transcript	70035	72138	.	-	.	transcript_id "AT1G01150.2"; gene_id "AT1G01150"; locus "RLOC_00000016";
1	Araport11	exon	70035	70233	.	-	.	transcript_id "AT1G01150.2"; gene_id "AT1G01150";
1	Araport11	exon	70896	70968	.	-	.	transcript_id "AT1G01150.2"; gene_id "AT1G01150";
1	Araport11	exon	71041	71721	.	-	.	transcript_id "AT1G01150.2"; gene_id "AT1G01150";
1	Araport11	exon	71942	72138	.	-	.	transcript_id "AT1G01150.2"; gene_id "AT1G01150";
1	Araport11	CDS	70115	70233	.	-	2	transcript_id "AT1G01150.2"; gene_id "AT1G01150";
1	Araport11	CDS	70896	70968	.	-	0	transcript_id "AT1G01150.2"; gene_id "AT1G01150";
1	Araport11	CDS	71041	71721	.	-	0	transcript_id "AT1G01150.2"; gene_id "AT1G01150";
1	Araport11	CDS	71942	71998	.	-	0	transcript_id "AT1G01150.2"; gene_id "AT1G01150";
1	Araport11	transcript	70619	72138	.	-	.	transcript_id "AT1G01150.3"; gene_id "AT1G01150"; locus "RLOC_00000016";
1	Araport11	exon	70619	70968	.	-	.	transcript_id "AT1G01150.3"; gene_id "AT1G01150";
1	Araport11	exon	71041	71721	.	-	.	transcript_id "AT1G01150.3"; gene_id "AT1G01150";
1	Araport11	exon	71942	72138	.	-	.	transcript_id "AT1G01150.3"; gene_id "AT1G01150";
1	Araport11	CDS	70828	70968	.	-	0	transcript_id "AT1G01150.3"; gene_id "AT1G01150";
1	Araport11	CDS	71041	71721	.	-	0	transcript_id "AT1G01150.3"; gene_id "AT1G01150";
1	Araport11	CDS	71942	71998	.	-	0	transcript_id "AT1G01150.3"; gene_id "AT1G01150";
1	StringTie	transcript	72316	74250	1000	+	.	transcript_id "STRG.16.1"; gene_id "STRG.16"; locus "RLOC_00000017";
1	StringTie	exon	72316	72669	1000	+	.	transcript_id "STRG.16.1"; gene_id "STRG.16";
1	StringTie	exon	73087	73163	1000	+	.	transcript_id "STRG.16.1"; gene_id "STRG.16";
1	StringTie	exon	73287	73395	1000	+	.	transcript_id "STRG.16.1"; gene_id "STRG.16";
1	StringTie	exon	73488	73740	1000	+	.	transcript_id "STRG.16.1"; gene_id "STRG.16";
1	StringTie	exon	73822	74250	1000	+	.	transcript_id "STRG.16.1"; gene_id "STRG.16";
1	StringTie	CDS	72583	72669	.	+	0	transcript_id "STRG.16.1"; gene_id "STRG.16";
1	StringTie	CDS	73087	73163	.	+	0	transcript_id "STRG.16.1"; gene_id "STRG.16";
1	StringTie	CDS	73287	73395	.	+	1	transcript_id "STRG.16.1"; gene_id "STRG.16";
1	StringTie	CDS	73488	73740	.	+	0	transcript_id "STRG.16.1"; gene_id "STRG.16";
1	StringTie	CDS	73822	73883	.	+	2	transcript_id "STRG.16.1"; gene_id "STRG.16";
1	Araport11	transcript	72357	74096	.	+	.	transcript_id "AT1G01160.2"; gene_id "AT1G01160"; locus "RLOC_00000017";
1	Araport11	exon	72357	72669	.	+	.	transcript_id "AT1G01160.2"; gene_id "AT1G01160";
1	Araport11	exon	72915	73016	.	+	.	transcript_id "AT1G01160.2"; gene_id "AT1G01160";
1	Araport11	exon	73087	73163	.	+	.	transcript_id "AT1G01160.2"; gene_id "AT1G01160";
1	Araport11	exon	73287	73395	.	+	.	transcript_id "AT1G01160.2"; gene_id "AT1G01160";
1	Araport11	exon	73488	73740	.	+	.	transcript_id "AT1G01160.2"; gene_id "AT1G01160";
1	Araport11	exon	73822	74096	.	+	.	transcript_id "AT1G01160.2"; gene_id "AT1G01160";
1	Araport11	CDS	72583	72669	.	+	0	transcript_id "AT1G01160.2"; gene_id "AT1G01160";
1	Araport11	CDS	72915	73016	.	+	0	transcript_id "AT1G01160.2"; gene_id "AT1G01160";
1	Araport11	CDS	73087	73163	.	+	0	transcript_id "AT1G01160.2"; gene_id "AT1G01160";
1	Araport11	CDS	73287	73395	.	+	1	transcript_id "AT1G01160.2"; gene_id "AT1G01160";
1	Araport11	CDS	73488	73740	.	+	0	transcript_id "AT1G01160.2"; gene_id "AT1G01160";
1	Araport11	CDS	73822	73883	.	+	2	transcript_id "AT1G01160.2"; gene_id "AT1G01160";
1	Araport11	transcript	72646	73108	.	-	.	transcript_id "AT1G04007.1"; gene_id "AT1G04007"; locus "RLOC_00000018";
1	Araport11	exon	72646	73108	.	-	.	transcript_id "AT1G04007.1"; gene_id "AT1G04007";
1	StringTie	transcript	73201	75031	1000	-	.	transcript_id "STRG.17.1"; gene_id "STRG.17"; locus "RLOC_00000019";
1	StringTie	exon	73201	74250	1000	-	.	transcript_id "STRG.17.1"; gene_id "STRG.17";
1	StringTie	exon	74338	74455	1000	-	.	transcript_id "STRG.17.1"; gene_id "STRG.17";
1	StringTie	exon	74661	75031	1000	-	.	transcript_id "STRG.17.1"; gene_id "STRG.17";
1	StringTie	CDS	74105	74250	.	-	2	transcript_id "STRG.17.1"; gene_id "STRG.17";
1	StringTie	CDS	74338	74443	.	-	0	transcript_id "STRG.17.1"; gene_id "STRG.17";
1	Araport11	transcript	73931	74731	.	-	.	transcript_id "AT1G01170.2"; gene_id "AT1G01170"; locus "RLOC_00000019";
1	Araport11	exon	73931	74250	.	-	.	transcript_id "AT1G01170.2"; gene_id "AT1G01170";
1	Araport11	exon	74338	74449	.	-	.	transcript_id "AT1G01170.2"; gene_id "AT1G01170";
1	Araport11	exon	74661	74731	.	-	.	transcript_id "AT1G01170.2"; gene_id "AT1G01170";
1	Araport11	CDS	74105	74250	.	-	2	transcript_id "AT1G01170.2"; gene_id "AT1G01170";
1	Araport11	CDS	74338	74443	.	-	0	transcript_id "AT1G01170.2"; gene_id "AT1G01170";
1	Araport11	transcript	74435	74683	.	+	.	transcript_id "AT1G04013.1"; gene_id "AT1G04013"; locus "RLOC_00000020";
1	Araport11	exon	74435	74683	.	+	.	transcript_id "AT1G04013.1"; gene_id "AT1G04013";
1	Araport11	transcript	75390	76845	.	+	.	transcript_id "AT1G01180.1"; gene_id "AT1G01180"; locus "RLOC_00000021";
1	Araport11	exon	75390	76845	.	+	.	transcript_id "AT1G01180.1"; gene_id "AT1G01180";
1	Araport11	CDS	75633	76556	.	+	0	transcript_id "AT1G01180.1"; gene_id "AT1G01180";
1	StringTie	transcript	77786	83807	1000	+	.	transcript_id "STRG.13.1"; gene_id "STRG.13"; locus "RLOC_00000022";
1	StringTie	exon	77786	78089	1000	+	.	transcript_id "STRG.13.1"; gene_id "STRG.13";
1	StringTie	exon	79097	83807	1000	+	.	transcript_id "STRG.13.1"; gene_id "STRG.13";
1	StringTie	transcript	82853	84936	1000	-	.	transcript_id "STRG.14.1"; gene_id "STRG.14"; locus "RLOC_00000023";
1	StringTie	exon	82853	83671	1000	-	.	transcript_id "STRG.14.1"; gene_id "STRG.14";
1	StringTie	exon	83884	84936	1000	-	.	transcript_id "STRG.14.1"; gene_id "STRG.14";
1	StringTie	CDS	83045	83671	.	-	0	transcript_id "STRG.14.1"; gene_id "STRG.14";
1	StringTie	CDS	83884	84864	.	-	0	transcript_id "STRG.14.1"; gene_id "STRG.14";
1	Araport11	transcript	86486	88409	.	-	.	transcript_id "AT1G01200.1"; gene_id "AT1G01200"; locus "RLOC_00000024";
1	Araport11	exon	86486	87162	.	-	.	transcript_id "AT1G01200.1"; gene_id "AT1G01200";
1	Araport11	exon	87880	88409	.	-	.	transcript_id "AT1G01200.1"; gene_id "AT1G01200";
1	Araport11	CDS	86715	87162	.	-	1	transcript_id "AT1G01200.1"; gene_id "AT1G01200";
1	Araport11	CDS	87880	88145	.	-	0	transcript_id "AT1G01200.1"; gene_id "AT1G01200";
1	Araport11	transcript	88622	89745	.	+	.	transcript_id "AT1G01210.2"; gene_id "AT1G01210"; locus "RLOC_00000025";
1	Araport11	exon	88622	88730	.	+	.	transcript_id "AT1G01210.2"; gene_id "AT1G01210";
1	Araport11	exon	88954	89081	.	+	.	transcript_id "AT1G01210.2"; gene_id "AT1G01210";
1	Araport11	exon	89173	89263	.	+	.	transcript_id "AT1G01210.2"; gene_id "AT1G01210";
1	Araport11	exon	89405	89745	.	+	.	transcript_id "AT1G01210.2"; gene_id "AT1G01210";
1	Araport11	CDS	88977	89081	.	+	0	transcript_id "AT1G01210.2"; gene_id "AT1G01210";
1	Araport11	CDS	89173	89263	.	+	0	transcript_id "AT1G01210.2"; gene_id "AT1G01210";
1	Araport11	CDS	89405	89529	.	+	2	transcript_id "AT1G01210.2"; gene_id "AT1G01210";
1	StringTie	transcript	88877	90698	1000	+	.	transcript_id "STRG.19.1"; gene_id "STRG.19"; locus "RLOC_00000025";
1	StringTie	exon	88877	89081	1000	+	.	transcript_id "STRG.19.1"; gene_id "STRG.19";
1	StringTie	exon	89173	89263	1000	+	.	transcript_id "STRG.19.1"; gene_id "STRG.19";
1	StringTie	exon	89405	90698	1000	+	.	transcript_id "STRG.19.1"; gene_id "STRG.19";
1	StringTie	CDS	88977	89081	.	+	0	transcript_id "STRG.19.1"; gene_id "STRG.19";
1	StringTie	CDS	89173	89263	.	+	0	transcript_id "STRG.19.1"; gene_id "STRG.19";
1	StringTie	CDS	89405	89529	.	+	2	transcript_id "STRG.19.1"; gene_id "STRG.19";
1	StringTie	transcript	88877	90698	1000	+	.	transcript_id "STRG.19.2"; gene_id "STRG.19"; locus "RLOC_00000025";
1	StringTie	exon	88877	89081	1000	+	.	transcript_id "STRG.19.2"; gene_id "STRG.19";
1	StringTie	exon	89173	89263	1000	+	.	transcript_id "STRG.19.2"; gene_id "STRG.19";
1	StringTie	exon	89405	89579	1000	+	.	transcript_id "STRG.19.2"; gene_id "STRG.19";
1	StringTie	exon	90162	90698	1000	+	.	transcript_id "STRG.19.2"; gene_id "STRG.19";
1	StringTie	CDS	88977	89081	.	+	0	transcript_id "STRG.19.2"; gene_id "STRG.19";
1	StringTie	CDS	89173	89263	.	+	0	transcript_id "STRG.19.2"; gene_id "STRG.19";
1	StringTie	CDS	89405	89529	.	+	2	transcript_id "STRG.19.2"; gene_id "STRG.19";
1	Araport11	transcript	90169	90401	.	-	.	transcript_id "AT1G04017.1"; gene_id "AT1G04017"; locus "RLOC_00000026";
1	Araport11	exon	90169	90401	.	-	.	transcript_id "AT1G04017.1"; gene_id "AT1G04017";
1	Araport11	transcript	91342	95681	.	+	.	transcript_id "AT1G01220.1"; gene_id "AT1G01220"; locus "RLOC_00000027";
1	Araport11	exon	91342	91633	.	+	.	transcript_id "AT1G01220.1"; gene_id "AT1G01220";
1	Araport11	exon	91743	92070	.	+	.	transcript_id "AT1G01220.1"; gene_id "AT1G01220";
1	Araport11	exon	92270	92501	.	+	.	transcript_id "AT1G01220.1"; gene_id "AT1G01220";
1	Araport11	exon	92569	92933	.	+	.	transcript_id "AT1G01220.1"; gene_id "AT1G01220";
1	Araport11	exon	93045	93171	.	+	.	transcript_id "AT1G01220.1"; gene_id "AT1G01220";
1	Araport11	exon	93271	94281	.	+	.	transcript_id "AT1G01220.1"; gene_id "AT1G01220";
1	Araport11	exon	94357	95075	.	+	.	transcript_id "AT1G01220.1"; gene_id "AT1G01220";
1	Araport11	exon	95160	95681	.	+	.	transcript_id "AT1G01220.1"; gene_id "AT1G01220";
1	Araport11	CDS	91750	92070	.	+	0	transcript_id "AT1G01220.1"; gene_id "AT1G01220";
1	Araport11	CDS	92270	92501	.	+	0	transcript_id "AT1G01220.1"; gene_id "AT1G01220";
1	Araport11	CDS	92569	92933	.	+	2	transcript_id "AT1G01220.1"; gene_id "AT1G01220";
1	Araport11	CDS	93045	93171	.	+	0	transcript_id "AT1G01220.1"; gene_id "AT1G01220";
1	Araport11	CDS	93271	94281	.	+	2	transcript_id "AT1G01220.1"; gene_id "AT1G01220";
1	Araport11	CDS	94357	95075	.	+	2	transcript_id "AT1G01220.1"; gene_id "AT1G01220";
1	Araport11	CDS	95160	95552	.	+	0	transcript_id "AT1G01220.1"; gene_id "AT1G01220";
1	Araport11	transcript	91342	95681	.	+	.	transcript_id "AT1G01220.2"; gene_id "AT1G01220"; locus "RLOC_00000027";
1	Araport11	exon	91342	91633	.	+	.	transcript_id "AT1G01220.2"; gene_id "AT1G01220";
1	Araport11	exon	91743	92933	.	+	.	transcript_id "AT1G01220.2"; gene_id "AT1G01220";
1	Araport11	exon	93045	93171	.	+	.	transcript_id "AT1G01220.2"; gene_id "AT1G01220";
1	Araport11	exon	93271	94281	.	+	.	transcript_id "AT1G01220.2"; gene_id "AT1G01220";
1	Araport11	exon	94357	95075	.	+	.	transcript_id "AT1G01220.2"; gene_id "AT1G01220";
1	Araport11	exon	95160	95681	.	+	.	transcript_id "AT1G01220.2"; gene_id "AT1G01220";
1	Araport11	CDS	92583	92933	.	+	0	transcript_id "AT1G01220.2"; gene_id "AT1G01220";
1	Araport11	CDS	93045	93171	.	+	0	transcript_id "AT1G01220.2"; gene_id "AT1G01220";
1	Araport11	CDS	93271	94281	.	+	2	transcript_id "AT1G01220.2"; gene_id "AT1G01220";
1	Araport11	CDS	94357	95075	.	+	2	transcript_id "AT1G01220.2"; gene_id "AT1G01220";
1	Araport11	CDS	95160	95552	.	+	0	transcript_id "AT1G01220.2"; gene_id "AT1G01220";
1	Araport11	transcript	91342	95681	.	+	.	transcript_id "AT1G01220.3"; gene_id "AT1G01220"; locus "RLOC_00000027";
1	Araport11	exon	91342	91633	.	+	.	transcript_id "AT1G01220.3"; gene_id "AT1G01220";
1	Araport11	exon	91743	92501	.	+	.	transcript_id "AT1G01220.3"; gene_id "AT1G01220";
1	Araport11	exon	92569	92933	.	+	.	transcript_id "AT1G01220.3"; gene_id "AT1G01220";
1	Araport11	exon	93045	93171	.	+	.	transcript_id "AT1G01220.3"; gene_id "AT1G01220";
1	Araport11	exon	93271	94281	.	+	.	transcript_id "AT1G01220.3"; gene_id "AT1G01220";
1	Araport11	exon	94357	95075	.	+	.	transcript_id "AT1G01220.3"; gene_id "AT1G01220";
1	Araport11	exon	95160	95681	.	+	.	transcript_id "AT1G01220.3"; gene_id "AT1G01220";
1	Araport11	CDS	92246	92501	.	+	0	transcript_id "AT1G01220.3"; gene_id "AT1G01220";
1	Araport11	CDS	92569	92933	.	+	2	transcript_id "AT1G01220.3"; gene_id "AT1G01220";
1	Araport11	CDS	93045	93171	.	+	0	transcript_id "AT1G01220.3"; gene_id "AT1G01220";
1	Araport11	CDS	93271	94281	.	+	2	transcript_id "AT1G01220.3"; gene_id "AT1G01220";
1	Araport11	CDS	94357	95075	.	+	2	transcript_id "AT1G01220.3"; gene_id "AT1G01220";
1	Araport11	CDS	95160	95552	.	+	0	transcript_id "AT1G01220.3"; gene_id "AT1G01220";
1	Araport11	transcript	91342	95681	.	+	.	transcript_id "AT1G01220.4"; gene_id "AT1G01220"; locus "RLOC_00000027";
1	Araport11	exon	91342	91633	.	+	.	transcript_id "AT1G01220.4"; gene_id "AT1G01220";
1	Araport11	exon	91743	92089	.	+	.	transcript_id "AT1G01220.4"; gene_id "AT1G01220";
1	Araport11	exon	92270	92501	.	+	.	transcript_id "AT1G01220.4"; gene_id "AT1G01220";
1	Araport11	exon	92569	92933	.	+	.	transcript_id "AT1G01220.4"; gene_id "AT1G01220";
1	Araport11	exon	93045	93171	.	+	.	transcript_id "AT1G01220.4"; gene_id "AT1G01220";
1	Araport11	exon	93271	94281	.	+	.	transcript_id "AT1G01220.4"; gene_id "AT1G01220";
1	Araport11	exon	94357	95075	.	+	.	transcript_id "AT1G01220.4"; gene_id "AT1G01220";
1	Araport11	exon	95160	95681	.	+	.	transcript_id "AT1G01220.4"; gene_id "AT1G01220";
1	Araport11	CDS	92270	92501	.	+	0	transcript_id "AT1G01220.4"; gene_id "AT1G01220";
1	Araport11	CDS	92569	92933	.	+	2	transcript_id "AT1G01220.4"; gene_id "AT1G01220";
1	Araport11	CDS	93045	93171	.	+	0	transcript_id "AT1G01220.4"; gene_id "AT1G01220";
1	Araport11	CDS	93271	94281	.	+	2	transcript_id "AT1G01220.4"; gene_id "AT1G01220";
1	Araport11	CDS	94357	95075	.	+	2	transcript_id "AT1G01220.4"; gene_id "AT1G01220";
1	Araport11	CDS	95160	95552	.	+	0	transcript_id "AT1G01220.4"; gene_id "AT1G01220";
1	Araport11	transcript	91376	95676	.	+	.	transcript_id "AT1G01220.5"; gene_id "AT1G01220"; locus "RLOC_00000027";
1	Araport11	exon	91376	91633	.	+	.	transcript_id "AT1G01220.5"; gene_id "AT1G01220";
1	Araport11	exon	91743	92089	.	+	.	transcript_id "AT1G01220.5"; gene_id "AT1G01220";
1	Araport11	exon	92270	92933	.	+	.	transcript_id "AT1G01220.5"; gene_id "AT1G01220";
1	Araport11	exon	93045	93171	.	+	.	transcript_id "AT1G01220.5"; gene_id "AT1G01220";
1	Araport11	exon	93271	94281	.	+	.	transcript_id "AT1G01220.5"; gene_id "AT1G01220";
1	Araport11	exon	94357	95075	.	+	.	transcript_id "AT1G01220.5"; gene_id "AT1G01220";
1	Araport11	exon	95160	95676	.	+	.	transcript_id "AT1G01220.5"; gene_id "AT1G01220";
1	Araport11	CDS	92583	92933	.	+	0	transcript_id "AT1G01220.5"; gene_id "AT1G01220";
1	Araport11	CDS	93045	93171	.	+	0	transcript_id "AT1G01220.5"; gene_id "AT1G01220";
1	Araport11	CDS	93271	94281	.	+	2	transcript_id "AT1G01220.5"; gene_id "AT1G01220";
1	Araport11	CDS	94357	95075	.	+	2	transcript_id "AT1G01220.5"; gene_id "AT1G01220";
1	Araport11	CDS	95160	95552	.	+	0	transcript_id "AT1G01220.5"; gene_id "AT1G01220";
1	StringTie	transcript	91392	95704	1000	+	.	transcript_id "STRG.20.3"; gene_id "STRG.20"; locus "RLOC_00000027";
1	StringTie	exon	91392	91633	1000	+	.	transcript_id "STRG.20.3"; gene_id "STRG.20";
1	StringTie	exon	91743	92070	1000	+	.	transcript_id "STRG.20.3"; gene_id "STRG.20";
1	StringTie	exon	92270	92933	1000	+	.	transcript_id "STRG.20.3"; gene_id "STRG.20";
1	StringTie	exon	93045	93171	1000	+	.	transcript_id "STRG.20.3"; gene_id "STRG.20";
1	StringTie	exon	93271	94281	1000	+	.	transcript_id "STRG.20.3"; gene_id "STRG.20";
1	StringTie	exon	94357	95075	1000	+	.	transcript_id "STRG.20.3"; gene_id "STRG.20";
1	StringTie	exon	95160	95704	1000	+	.	transcript_id "STRG.20.3"; gene_id "STRG.20";
1	StringTie	CDS	92583	92933	.	+	0	transcript_id "STRG.20.3"; gene_id "STRG.20";
1	StringTie	CDS	93045	93171	.	+	0	transcript_id "STRG.20.3"; gene_id "STRG.20";
1	StringTie	CDS	93271	94281	.	+	2	transcript_id "STRG.20.3"; gene_id "STRG.20";
1	StringTie	CDS	94357	95075	.	+	2	transcript_id "STRG.20.3"; gene_id "STRG.20";
1	StringTie	CDS	95160	95552	.	+	0	transcript_id "STRG.20.3"; gene_id "STRG.20";
1	StringTie	transcript	91392	95704	1000	+	.	transcript_id "STRG.20.5"; gene_id "STRG.20"; locus "RLOC_00000027";
1	StringTie	exon	91392	91633	1000	+	.	transcript_id "STRG.20.5"; gene_id "STRG.20";
1	StringTie	exon	91743	92933	1000	+	.	transcript_id "STRG.20.5"; gene_id "STRG.20";
1	StringTie	exon	93045	93171	1000	+	.	transcript_id "STRG.20.5"; gene_id "STRG.20";
1	StringTie	exon	93271	94281	1000	+	.	transcript_id "STRG.20.5"; gene_id "STRG.20";
1	StringTie	exon	94357	95704	1000	+	.	transcript_id "STRG.20.5"; gene_id "STRG.20";
1	Araport11	transcript	91642	95674	.	+	.	transcript_id "AT1G01220.7"; gene_id "AT1G01220"; locus "RLOC_00000027";
1	Araport11	exon	91642	92070	.	+	.	transcript_id "AT1G01220.7"; gene_id "AT1G01220";
1	Araport11	exon	92270	92501	.	+	.	transcript_id "AT1G01220.7"; gene_id "AT1G01220";
1	Araport11	exon	92569	92933	.	+	.	transcript_id "AT1G01220.7"; gene_id "AT1G01220";
1	Araport11	exon	93045	93171	.	+	.	transcript_id "AT1G01220.7"; gene_id "AT1G01220";
1	Araport11	exon	93271	94281	.	+	.	transcript_id "AT1G01220.7"; gene_id "AT1G01220";
1	Araport11	exon	94357	95075	.	+	.	transcript_id "AT1G01220.7"; gene_id "AT1G01220";
1	Araport11	exon	95160	95674	.	+	.	transcript_id "AT1G01220.7"; gene_id "AT1G01220";
1	Araport11	CDS	91750	92070	.	+	0	transcript_id "AT1G01220.7"; gene_id "AT1G01220";
1	Araport11	CDS	92270	92501	.	+	0	transcript_id "AT1G01220.7"; gene_id "AT1G01220";
1	Araport11	CDS	92569	92933	.	+	2	transcript_id "AT1G01220.7"; gene_id "AT1G01220";
1	Araport11	CDS	93045	93171	.	+	0	transcript_id "AT1G01220.7"; gene_id "AT1G01220";
1	Araport11	CDS	93271	94281	.	+	2	transcript_id "AT1G01220.7"; gene_id "AT1G01220";
1	Araport11	CDS	94357	95075	.	+	2	transcript_id "AT1G01220.7"; gene_id "AT1G01220";
1	Araport11	CDS	95160	95552	.	+	0	transcript_id "AT1G01220.7"; gene_id "AT1G01220";
1	Araport11	transcript	91692	95681	.	+	.	transcript_id "AT1G01220.8"; gene_id "AT1G01220"; locus "RLOC_00000027";
1	Araport11	exon	91692	92501	.	+	.	transcript_id "AT1G01220.8"; gene_id "AT1G01220";
1	Araport11	exon	92569	92933	.	+	.	transcript_id "AT1G01220.8"; gene_id "AT1G01220";
1	Araport11	exon	93045	93171	.	+	.	transcript_id "AT1G01220.8"; gene_id "AT1G01220";
1	Araport11	exon	93271	94281	.	+	.	transcript_id "AT1G01220.8"; gene_id "AT1G01220";
1	Araport11	exon	94357	95075	.	+	.	transcript_id "AT1G01220.8"; gene_id "AT1G01220";
1	Araport11	exon	95160	95681	.	+	.	transcript_id "AT1G01220.8"; gene_id "AT1G01220";
1	Araport11	CDS	92246	92501	.	+	0	transcript_id "AT1G01220.8"; gene_id "AT1G01220";
1	Araport11	CDS	92569	92933	.	+	2	transcript_id "AT1G01220.8"; gene_id "AT1G01220";
1	Araport11	CDS	93045	93171	.	+	0	transcript_id "AT1G01220.8"; gene_id "AT1G01220";
1	Araport11	CDS	93271	94281	.	+	2	transcript_id "AT1G01220.8"; gene_id "AT1G01220";
1	Araport11	CDS	94357	95075	.	+	2	transcript_id "AT1G01220.8"; gene_id "AT1G01220";
1	Araport11	CDS	95160	95552	.	+	0	transcript_id "AT1G01220.8"; gene_id "AT1G01220";
1	Araport11	transcript	91356	91685	.	-	.	transcript_id "AT1G04023.1"; gene_id "AT1G04023"; locus "RLOC_00000028";
1	Araport11	exon	91356	91685	.	-	.	transcript_id "AT1G04023.1"; gene_id "AT1G04023";
1	StringTie	transcript	95839	99251	1000	+	.	transcript_id "STRG.21.1"; gene_id "STRG.21"; locus "RLOC_00000029";
1	StringTie	exon	95839	96157	1000	+	.	transcript_id "STRG.21.1"; gene_id "STRG.21";
1	StringTie	exon	96554	97805	1000	+	.	transcript_id "STRG.21.1"; gene_id "STRG.21";
1	StringTie	exon	98457	98605	1000	+	.	transcript_id "STRG.21.1"; gene_id "STRG.21";
1	StringTie	exon	98908	99251	1000	+	.	transcript_id "STRG.21.1"; gene_id "STRG.21";
1	StringTie	CDS	96064	96157	.	+	0	transcript_id "STRG.21.1"; gene_id "STRG.21";
1	StringTie	CDS	96554	97242	.	+	2	transcript_id "STRG.21.1"; gene_id "STRG.21";
1	StringTie	transcript	95839	99251	1000	+	.	transcript_id "STRG.21.2"; gene_id "STRG.21"; locus "RLOC_00000029";
1	StringTie	exon	95839	97805	1000	+	.	transcript_id "STRG.21.2"; gene_id "STRG.21";
1	StringTie	exon	98457	98605	1000	+	.	transcript_id "STRG.21.2"; gene_id "STRG.21";
1	StringTie	exon	98908	99251	1000	+	.	transcript_id "STRG.21.2"; gene_id "STRG.21";
1	StringTie	CDS	97620	97805	.	+	0	transcript_id "STRG.21.2"; gene_id "STRG.21";
1	StringTie	CDS	98457	98605	.	+	0	transcript_id "STRG.21.2"; gene_id "STRG.21";
1	StringTie	CDS	98908	99046	.	+	1	transcript_id "STRG.21.2"; gene_id "STRG.21";
1	Araport11	transcript	99866	101987	.	+	.	transcript_id "AT1G01240.1"; gene_id "AT1G01240"; locus "RLOC_00000030";
1	Araport11	exon	99866	100031	.	+	.	transcript_id "AT1G01240.1"; gene_id "AT1G01240";
1	Araport11	exon	100657	101987	.	+	.	transcript_id "AT1G01240.1"; gene_id "AT1G01240";
1	Araport11	CDS	100683	101678	.	+	0	transcript_id "AT1G01240.1"; gene_id "AT1G01240";
1	Araport11	transcript	99866	101987	.	+	.	transcript_id "AT1G01240.2"; gene_id "AT1G01240"; locus "RLOC_00000030";
1	Araport11	exon	99866	100220	.	+	.	transcript_id "AT1G01240.2"; gene_id "AT1G01240";
1	Araport11	exon	100657	101987	.	+	.	transcript_id "AT1G01240.2"; gene_id "AT1G01240";
1	Araport11	CDS	100683	101678	.	+	0	transcript_id "AT1G01240.2"; gene_id "AT1G01240";
1	Araport11	transcript	99866	101987	.	+	.	transcript_id "AT1G01240.3"; gene_id "AT1G01240"; locus "RLOC_00000030";
1	Araport11	exon	99866	101987	.	+	.	transcript_id "AT1G01240.3"; gene_id "AT1G01240";
1	Araport11	CDS	100683	101678	.	+	0	transcript_id "AT1G01240.3"; gene_id "AT1G01240";
1	Araport11	transcript	99872	101882	.	+	.	transcript_id "AT1G01240.5"; gene_id "AT1G01240"; locus "RLOC_00000030";
1	Araport11	exon	99872	100031	.	+	.	transcript_id "AT1G01240.5"; gene_id "AT1G01240";
1	Araport11	exon	100111	101882	.	+	.	transcript_id "AT1G01240.5"; gene_id "AT1G01240";
1	Araport11	CDS	100683	101678	.	+	0	transcript_id "AT1G01240.5"; gene_id "AT1G01240";
1	StringTie	transcript	99876	101950	1000	+	.	transcript_id "STRG.29.3"; gene_id "STRG.29"; locus "RLOC_00000030";
1	StringTie	exon	99876	100031	1000	+	.	transcript_id "STRG.29.3"; gene_id "STRG.29";
1	StringTie	exon	100111	100220	1000	+	.	transcript_id "STRG.29.3"; gene_id "STRG.29";
1	StringTie	exon	100657	101950	1000	+	.	transcript_id "STRG.29.3"; gene_id "STRG.29";
1	StringTie	CDS	100683	101678	.	+	0	transcript_id "STRG.29.3"; gene_id "STRG.29";
1	StringTie	transcript	99876	101950	1000	+	.	transcript_id "STRG.29.4"; gene_id "STRG.29"; locus "RLOC_00000030";
1	StringTie	exon	99876	100031	1000	+	.	transcript_id "STRG.29.4"; gene_id "STRG.29";
1	StringTie	exon	100593	101950	1000	+	.	transcript_id "STRG.29.4"; gene_id "STRG.29";
1	StringTie	transcript	104428	105344	1000	-	.	transcript_id "STRG.30.1"; gene_id "STRG.30"; locus "RLOC_00000031";
1	StringTie	exon	104428	105344	1000	-	.	transcript_id "STRG.30.1"; gene_id "STRG.30";
1	StringTie	CDS	104731	105309	.	-	0	transcript_id "STRG.30.1"; gene_id "STRG.30";
1	Araport11	transcript	108946	111699	.	+	.	transcript_id "AT1G01260.3"; gene_id "AT1G01260"; locus "RLOC_00000032";
1	Araport11	exon	108946	109330	.	+	.	transcript_id "AT1G01260.3"; gene_id "AT1G01260";
1	Araport11	exon	109406	111699	.	+	.	transcript_id "AT1G01260.3"; gene_id "AT1G01260";
1	Araport11	CDS	109595	111367	.	+	0	transcript_id "AT1G01260.3"; gene_id "AT1G01260";
1	Araport11	transcript	108991	111699	.	+	.	transcript_id "AT1G01260.1"; gene_id "AT1G01260"; locus "RLOC_00000032";
1	Araport11	exon	108991	111699	.	+	.	transcript_id "AT1G01260.1"; gene_id "AT1G01260";
1	Araport11	CDS	109595	111367	.	+	0	transcript_id "AT1G01260.1"; gene_id "AT1G01260";
1	Araport11	transcript	109076	111535	.	+	.	transcript_id "AT1G01260.2"; gene_id "AT1G01260"; locus "RLOC_00000032";
1	Araport11	exon	109076	109330	.	+	.	transcript_id "AT1G01260.2"; gene_id "AT1G01260";
1	Araport11	exon	109413	111535	.	+	.	transcript_id "AT1G01260.2"; gene_id "AT1G01260";
1	Araport11	CDS	109595	111367	.	+	0	transcript_id "AT1G01260.2"; gene_id "AT1G01260";
1	Araport11	transcript	111890	111961	.	-	.	transcript_id "AT1G01270.1"; gene_id "AT1G01270"; locus "RLOC_00000033";
1	Araport11	exon	111890	111961	72	-	.	transcript_id "AT1G01270.1"; gene_id "AT1G01270";
1	Araport11	transcript	112263	113947	.	+	.	transcript_id "AT1G01280.1"; gene_id "AT1G01280"; locus "RLOC_00000034";
1	Araport11	exon	112263	113195	.	+	.	transcript_id "AT1G01280.1"; gene_id "AT1G01280";
1	Araport11	exon	113279	113947	.	+	.	transcript_id "AT1G01280.1"; gene_id "AT1G01280";
1	Araport11	CDS	112290	113195	.	+	0	transcript_id "AT1G01280.1"; gene_id "AT1G01280";
1	Araport11	CDS	113279	113905	.	+	0	transcript_id "AT1G01280.1"; gene_id "AT1G01280";
1	StringTie	transcript	114192	115960	1000	+	.	transcript_id "STRG.32.3"; gene_id "STRG.32"; locus "RLOC_00000035";
1	StringTie	exon	114192	114433	1000	+	.	transcript_id "STRG.32.3"; gene_id "STRG.32";
1	StringTie	exon	114619	115339	1000	+	.	transcript_id "STRG.32.3"; gene_id "STRG.32";
1	StringTie	exon	115482	115960	1000	+	.	transcript_id "STRG.32.3"; gene_id "STRG.32";
1	StringTie	transcript	114192	116417	1000	+	.	transcript_id "STRG.32.1"; gene_id "STRG.32"; locus "RLOC_00000035";
1	StringTie	exon	114192	114433	1000	+	.	transcript_id "STRG.32.1"; gene_id "STRG.32";
1	StringTie	exon	114619	115339	1000	+	.	transcript_id "STRG.32.1"; gene_id "STRG.32";
1	StringTie	exon	115961	116417	1000	+	.	transcript_id "STRG.32.1"; gene_id "STRG.32";
1	StringTie	CDS	114299	114433	.	+	0	transcript_id "STRG.32.1"; gene_id "STRG.32";
1	StringTie	CDS	114619	115296	.	+	0	transcript_id "STRG.32.1"; gene_id "STRG.32";
1	Araport11	transcript	114202	116407	.	+	.	transcript_id "AT1G01290.1"; gene_id "AT1G01290"; locus "RLOC_00000035";
1	Araport11	exon	114202	114433	.	+	.	transcript_id "AT1G01290.1"; gene_id "AT1G01290";
1	Araport11	exon	114619	116407	.	+	.	transcript_id "AT1G01290.1"; gene_id "AT1G01290";
1	Araport11	CDS	114299	114433	.	+	0	transcript_id "AT1G01290.1"; gene_id "AT1G01290";
1	Araport11	CDS	114619	115296	.	+	0	transcript_id "AT1G01290.1"; gene_id "AT1G01290";
1	Araport11	transcript	116784	118845	.	+	.	transcript_id "AT1G01300.1"; gene_id "AT1G01300"; locus "RLOC_00000036";
1	Araport11	exon	116784	118845	.	+	.	transcript_id "AT1G01300.1"; gene_id "AT1G01300";
1	Araport11	CDS	117065	118522	.	+	0	transcript_id "AT1G01300.1"; gene_id "AT1G01300";
1	Araport11	transcript	119381	119997	.	+	.	transcript_id "AT1G01305.1"; gene_id "AT1G01305"; locus "RLOC_00000037";
1	Araport11	exon	119381	119997	.	+	.	transcript_id "AT1G01305.1"; gene_id "AT1G01305";
1	Araport11	CDS	119429	119854	.	+	0	transcript_id "AT1G01305.1"; gene_id "AT1G01305";
1	StringTie	transcript	120082	130716	1000	-	.	transcript_id "STRG.34.1"; gene_id "STRG.34"; locus "RLOC_00000038";
1	StringTie	exon	120082	121406	1000	-	.	transcript_id "STRG.34.1"; gene_id "STRG.34";
1	StringTie	exon	121493	123501	1000	-	.	transcript_id "STRG.34.1"; gene_id "STRG.34";
1	StringTie	exon	123579	123669	1000	-	.	transcript_id "STRG.34.1"; gene_id "STRG.34";
1	StringTie	exon	123785	123897	1000	-	.	transcript_id "STRG.34.1"; gene_id "STRG.34";
1	StringTie	exon	123992	124123	1000	-	.	transcript_id "STRG.34.1"; gene_id "STRG.34";
1	StringTie	exon	124211	124394	1000	-	.	transcript_id "STRG.34.1"; gene_id "STRG.34";
1	StringTie	exon	124499	124632	1000	-	.	transcript_id "STRG.34.1"; gene_id "STRG.34";
1	StringTie	exon	124714	124818	1000	-	.	transcript_id "STRG.34.1"; gene_id "STRG.34";
1	StringTie	exon	124921	125022	1000	-	.	transcript_id "STRG.34.1"; gene_id "STRG.34";
1	StringTie	exon	125134	125226	1000	-	.	transcript_id "STRG.34.1"; gene_id "STRG.34";
1	StringTie	exon	125329	125655	1000	-	.	transcript_id "STRG.34.1"; gene_id "STRG.34";
1	StringTie	exon	125742	125843	1000	-	.	transcript_id "STRG.34.1"; gene_id "STRG.34";
1	StringTie	exon	125936	125998	1000	-	.	transcript_id "STRG.34.1"; gene_id "STRG.34";
1	StringTie	exon	126076	126589	1000	-	.	transcript_id "STRG.34.1"; gene_id "STRG.34";
1	StringTie	exon	126686	126840	1000	-	.	transcript_id "STRG.34.1"; gene_id "STRG.34";
1	StringTie	exon	126935	127453	1000	-	.	transcript_id "STRG.34.1"; gene_id "STRG.34";
1	StringTie	exon	127532	127573	1000	-	.	transcript_id "STRG.34.1"; gene_id "STRG.34";
1	StringTie	exon	127651	127782	1000	-	.	transcript_id "STRG.34.1"; gene_id "STRG.34";
1	StringTie	exon	127868	127935	1000	-	.	transcript_id "STRG.34.1"; gene_id "STRG.34";
1	StringTie	exon	128028	128312	1000	-	.	transcript_id "STRG.34.1"; gene_id "STRG.34";
1	StringTie	exon	128479	128551	1000	-	.	transcript_id "STRG.34.1"; gene_id "STRG.34";
1	StringTie	exon	128968	129060	1000	-	.	transcript_id "STRG.34.1"; gene_id "STRG.34";
1	StringTie	exon	129853	129914	1000	-	.	transcript_id "STRG.34.1"; gene_id "STRG.34";
1	StringTie	exon	130039	130149	1000	-	.	transcript_id "STRG.34.1"; gene_id "STRG.34";
1	StringTie	exon	130372	130716	1000	-	.	transcript_id "STRG.34.1"; gene_id "STRG.34";
1	StringTie	CDS	121582	123501	.	-	0	transcript_id "STRG.34.1"; gene_id "STRG.34";
1	StringTie	CDS	123579	123669	.	-	1	transcript_id "STRG.34.1"; gene_id "STRG.34";
1	StringTie	CDS	123785	123897	.	-	0	transcript_id "STRG.34.1"; gene_id "STRG.34";
1	StringTie	CDS	123992	124123	.	-	0	transcript_id "STRG.34.1"; gene_id "STRG.34";
1	StringTie	CDS	124211	124394	.	-	1	transcript_id "STRG.34.1"; gene_id "STRG.34";
1	StringTie	CDS	124499	124632	.	-	0	transcript_id "STRG.34.1"; gene_id "STRG.34";
1	StringTie	CDS	124714	124818	.	-	0	transcript_id "STRG.34.1"; gene_id "STRG.34";
1	StringTie	CDS	124921	125022	.	-	0	transcript_id "STRG.34.1"; gene_id "STRG.34";
1	StringTie	CDS	125134	125226	.	-	0	transcript_id "STRG.34.1"; gene_id "STRG.34";
1	StringTie	CDS	125329	125655	.	-	0	transcript_id "STRG.34.1"; gene_id "STRG.34";
1	StringTie	CDS	125742	125843	.	-	0	transcript_id "STRG.34.1"; gene_id "STRG.34";
1	StringTie	CDS	125936	125998	.	-	0	transcript_id "STRG.34.1"; gene_id "STRG.34";
1	StringTie	CDS	126076	126589	.	-	1	transcript_id "STRG.34.1"; gene_id "STRG.34";
1	StringTie	CDS	126686	126840	.	-	0	transcript_id "STRG.34.1"; gene_id "STRG.34";
1	StringTie	CDS	126935	127453	.	-	0	transcript_id "STRG.34.1"; gene_id "STRG.34";
1	StringTie	CDS	127532	127573	.	-	0	transcript_id "STRG.34.1"; gene_id "STRG.34";
1	StringTie	CDS	127651	127782	.	-	0	transcript_id "STRG.34.1"; gene_id "STRG.34";
1	StringTie	CDS	127868	127935	.	-	2	transcript_id "STRG.34.1"; gene_id "STRG.34";
1	StringTie	CDS	128028	128312	.	-	2	transcript_id "STRG.34.1"; gene_id "STRG.34";
1	StringTie	CDS	128479	128551	.	-	0	transcript_id "STRG.34.1"; gene_id "STRG.34";
1	StringTie	CDS	128968	129060	.	-	0	transcript_id "STRG.34.1"; gene_id "STRG.34";
1	StringTie	CDS	129853	129914	.	-	2	transcript_id "STRG.34.1"; gene_id "STRG.34";
1	StringTie	CDS	130039	130099	.	-	0	transcript_id "STRG.34.1"; gene_id "STRG.34";
1	StringTie	transcript	120082	130716	1000	-	.	transcript_id "STRG.34.2"; gene_id "STRG.34"; locus "RLOC_00000038";
1	StringTie	exon	120082	121406	1000	-	.	transcript_id "STRG.34.2"; gene_id "STRG.34";
1	StringTie	exon	121493	123501	1000	-	.	transcript_id "STRG.34.2"; gene_id "STRG.34";
1	StringTie	exon	123579	123669	1000	-	.	transcript_id "STRG.34.2"; gene_id "STRG.34";
1	StringTie	exon	123785	123897	1000	-	.	transcript_id "STRG.34.2"; gene_id "STRG.34";
1	StringTie	exon	123992	124123	1000	-	.	transcript_id "STRG.34.2"; gene_id "STRG.34";
1	StringTie	exon	124211	124394	1000	-	.	transcript_id "STRG.34.2"; gene_id "STRG.34";
1	StringTie	exon	124499	124632	1000	-	.	transcript_id "STRG.34.2"; gene_id "STRG.34";
1	StringTie	exon	124714	124818	1000	-	.	transcript_id "STRG.34.2"; gene_id "STRG.34";
1	StringTie	exon	124921	125022	1000	-	.	transcript_id "STRG.34.2"; gene_id "STRG.34";
1	StringTie	exon	125134	125226	1000	-	.	transcript_id "STRG.34.2"; gene_id "STRG.34";
1	StringTie	exon	125329	125655	1000	-	.	transcript_id "STRG.34.2"; gene_id "STRG.34";
1	StringTie	exon	125742	125843	1000	-	.	transcript_id "STRG.34.2"; gene_id "STRG.34";
1	StringTie	exon	125936	125998	1000	-	.	transcript_id "STRG.34.2"; gene_id "STRG.34";
1	StringTie	exon	126076	126589	1000	-	.	transcript_id "STRG.34.2"; gene_id "STRG.34";
1	StringTie	exon	126686	126840	1000	-	.	transcript_id "STRG.34.2"; gene_id "STRG.34";
1	StringTie	exon	126935	127453	1000	-	.	transcript_id "STRG.34.2"; gene_id "STRG.34";
1	StringTie	exon	127532	127573	1000	-	.	transcript_id "STRG.34.2"; gene_id "STRG.34";
1	StringTie	exon	127651	127782	1000	-	.	transcript_id "STRG.34.2"; gene_id "STRG.34";
1	StringTie	exon	127868	127935	1000	-	.	transcript_id "STRG.34.2"; gene_id "STRG.34";
1	StringTie	exon	128028	128312	1000	-	.	transcript_id "STRG.34.2"; gene_id "STRG.34";
1	StringTie	exon	128479	128551	1000	-	.	transcript_id "STRG.34.2"; gene_id "STRG.34";
1	StringTie	exon	128968	129060	1000	-	.	transcript_id "STRG.34.2"; gene_id "STRG.34";
1	StringTie	exon	129853	129914	1000	-	.	transcript_id "STRG.34.2"; gene_id "STRG.34";
1	StringTie	exon	130039	130716	1000	-	.	transcript_id "STRG.34.2"; gene_id "STRG.34";
1	Araport11	transcript	121067	130577	.	-	.	transcript_id "AT1G01320.2"; gene_id "AT1G01320"; locus "RLOC_00000038";
1	Araport11	exon	121067	121406	.	-	.	transcript_id "AT1G01320.2"; gene_id "AT1G01320";
1	Araport11	exon	121493	123495	.	-	.	transcript_id "AT1G01320.2"; gene_id "AT1G01320";
1	Araport11	exon	123579	123669	.	-	.	transcript_id "AT1G01320.2"; gene_id "AT1G01320";
1	Araport11	exon	123785	123897	.	-	.	transcript_id "AT1G01320.2"; gene_id "AT1G01320";
1	Araport11	exon	123992	124123	.	-	.	transcript_id "AT1G01320.2"; gene_id "AT1G01320";
1	Araport11	exon	124211	124394	.	-	.	transcript_id "AT1G01320.2"; gene_id "AT1G01320";
1	Araport11	exon	124499	124632	.	-	.	transcript_id "AT1G01320.2"; gene_id "AT1G01320";
1	Araport11	exon	124714	124818	.	-	.	transcript_id "AT1G01320.2"; gene_id "AT1G01320";
1	Araport11	exon	124921	125022	.	-	.	transcript_id "AT1G01320.2"; gene_id "AT1G01320";
1	Araport11	exon	125134	125226	.	-	.	transcript_id "AT1G01320.2"; gene_id "AT1G01320";
1	Araport11	exon	125329	125655	.	-	.	transcript_id "AT1G01320.2"; gene_id "AT1G01320";
1	Araport11	exon	125742	125843	.	-	.	transcript_id "AT1G01320.2"; gene_id "AT1G01320";
1	Araport11	exon	125936	125998	.	-	.	transcript_id "AT1G01320.2"; gene_id "AT1G01320";
1	Araport11	exon	126076	126589	.	-	.	transcript_id "AT1G01320.2"; gene_id "AT1G01320";
1	Araport11	exon	126686	126840	.	-	.	transcript_id "AT1G01320.2"; gene_id "AT1G01320";
1	Araport11	exon	126935	127453	.	-	.	transcript_id "AT1G01320.2"; gene_id "AT1G01320";
1	Araport11	exon	127532	127573	.	-	.	transcript_id "AT1G01320.2"; gene_id "AT1G01320";
1	Araport11	exon	127651	127782	.	-	.	transcript_id "AT1G01320.2"; gene_id "AT1G01320";
1	Araport11	exon	127868	127935	.	-	.	transcript_id "AT1G01320.2"; gene_id "AT1G01320";
1	Araport11	exon	128028	128312	.	-	.	transcript_id "AT1G01320.2"; gene_id "AT1G01320";
1	Araport11	exon	128479	128551	.	-	.	transcript_id "AT1G01320.2"; gene_id "AT1G01320";
1	Araport11	exon	128968	129060	.	-	.	transcript_id "AT1G01320.2"; gene_id "AT1G01320";
1	Araport11	exon	129853	129914	.	-	.	transcript_id "AT1G01320.2"; gene_id "AT1G01320";
1	Araport11	exon	130039	130149	.	-	.	transcript_id "AT1G01320.2"; gene_id "AT1G01320";
1	Araport11	exon	130372	130577	.	-	.	transcript_id "AT1G01320.2"; gene_id "AT1G01320";
1	Araport11	CDS	121582	123495	.	-	0	transcript_id "AT1G01320.2"; gene_id "AT1G01320";
1	Araport11	CDS	123579	123669	.	-	1	transcript_id "AT1G01320.2"; gene_id "AT1G01320";
1	Araport11	CDS	123785	123897	.	-	0	transcript_id "AT1G01320.2"; gene_id "AT1G01320";
1	Araport11	CDS	123992	124123	.	-	0	transcript_id "AT1G01320.2"; gene_id "AT1G01320";
1	Araport11	CDS	124211	124394	.	-	1	transcript_id "AT1G01320.2"; gene_id "AT1G01320";
1	Araport11	CDS	124499	124632	.	-	0	transcript_id "AT1G01320.2"; gene_id "AT1G01320";
1	Araport11	CDS	124714	124818	.	-	0	transcript_id "AT1G01320.2"; gene_id "AT1G01320";
1	Araport11	CDS	124921	125022	.	-	0	transcript_id "AT1G01320.2"; gene_id "AT1G01320";
1	Araport11	CDS	125134	125226	.	-	0	transcript_id "AT1G01320.2"; gene_id "AT1G01320";
1	Araport11	CDS	125329	125655	.	-	0	transcript_id "AT1G01320.2"; gene_id "AT1G01320";
1	Araport11	CDS	125742	125843	.	-	0	transcript_id "AT1G01320.2"; gene_id "AT1G01320";
1	Araport11	CDS	125936	125998	.	-	0	transcript_id "AT1G01320.2"; gene_id "AT1G01320";
1	Araport11	CDS	126076	126589	.	-	1	transcript_id "AT1G01320.2"; gene_id "AT1G01320";
1	Araport11	CDS	126686	126840	.	-	0	transcript_id "AT1G01320.2"; gene_id "AT1G01320";
1	Araport11	CDS	126935	127453	.	-	0	transcript_id "AT1G01320.2"; gene_id "AT1G01320";
1	Araport11	CDS	127532	127573	.	-	0	transcript_id "AT1G01320.2"; gene_id "AT1G01320";
1	Araport11	CDS	127651	127782	.	-	0	transcript_id "AT1G01320.2"; gene_id "AT1G01320";
1	Araport11	CDS	127868	127935	.	-	2	transcript_id "AT1G01320.2"; gene_id "AT1G01320";
1	Araport11	CDS	128028	128312	.	-	2	transcript_id "AT1G01320.2"; gene_id "AT1G01320";
1	Araport11	CDS	128479	128551	.	-	0	transcript_id "AT1G01320.2"; gene_id "AT1G01320";
1	Araport11	CDS	128968	129060	.	-	0	transcript_id "AT1G01320.2"; gene_id "AT1G01320";
1	Araport11	CDS	129853	129914	.	-	2	transcript_id "AT1G01320.2"; gene_id "AT1G01320";
1	Araport11	CDS	130039	130099	.	-	0	transcript_id "AT1G01320.2"; gene_id "AT1G01320";
1	Araport11	transcript	121124	130570	.	-	.	transcript_id "AT1G01320.1"; gene_id "AT1G01320"; locus "RLOC_00000038";
1	Araport11	exon	121124	121406	.	-	.	transcript_id "AT1G01320.1"; gene_id "AT1G01320";
1	Araport11	exon	121493	123501	.	-	.	transcript_id "AT1G01320.1"; gene_id "AT1G01320";
1	Araport11	exon	123579	123669	.	-	.	transcript_id "AT1G01320.1"; gene_id "AT1G01320";
1	Araport11	exon	123785	123897	.	-	.	transcript_id "AT1G01320.1"; gene_id "AT1G01320";
1	Araport11	exon	123992	124123	.	-	.	transcript_id "AT1G01320.1"; gene_id "AT1G01320";
1	Araport11	exon	124211	124394	.	-	.	transcript_id "AT1G01320.1"; gene_id "AT1G01320";
1	Araport11	exon	124499	124632	.	-	.	transcript_id "AT1G01320.1"; gene_id "AT1G01320";
1	Araport11	exon	124714	124818	.	-	.	transcript_id "AT1G01320.1"; gene_id "AT1G01320";
1	Araport11	exon	124921	125046	.	-	.	transcript_id "AT1G01320.1"; gene_id "AT1G01320";
1	Araport11	exon	125134	125226	.	-	.	transcript_id "AT1G01320.1"; gene_id "AT1G01320";
1	Araport11	exon	125329	125655	.	-	.	transcript_id "AT1G01320.1"; gene_id "AT1G01320";
1	Araport11	exon	125742	125843	.	-	.	transcript_id "AT1G01320.1"; gene_id "AT1G01320";
1	Araport11	exon	125936	125998	.	-	.	transcript_id "AT1G01320.1"; gene_id "AT1G01320";
1	Araport11	exon	126076	126589	.	-	.	transcript_id "AT1G01320.1"; gene_id "AT1G01320";
1	Araport11	exon	126686	126840	.	-	.	transcript_id "AT1G01320.1"; gene_id "AT1G01320";
1	Araport11	exon	126935	127453	.	-	.	transcript_id "AT1G01320.1"; gene_id "AT1G01320";
1	Araport11	exon	127532	127573	.	-	.	transcript_id "AT1G01320.1"; gene_id "AT1G01320";
1	Araport11	exon	127651	127782	.	-	.	transcript_id "AT1G01320.1"; gene_id "AT1G01320";
1	Araport11	exon	127868	127935	.	-	.	transcript_id "AT1G01320.1"; gene_id "AT1G01320";
1	Araport11	exon	128028	128312	.	-	.	transcript_id "AT1G01320.1"; gene_id "AT1G01320";
1	Araport11	exon	128479	128551	.	-	.	transcript_id "AT1G01320.1"; gene_id "AT1G01320";
1	Araport11	exon	128968	129060	.	-	.	transcript_id "AT1G01320.1"; gene_id "AT1G01320";
1	Araport11	exon	129853	129914	.	-	.	transcript_id "AT1G01320.1"; gene_id "AT1G01320";
1	Araport11	exon	130039	130149	.	-	.	transcript_id "AT1G01320.1"; gene_id "AT1G01320";
1	Araport11	exon	130372	130570	.	-	.	transcript_id "AT1G01320.1"; gene_id "AT1G01320";
1	Araport11	CDS	121582	123501	.	-	0	transcript_id "AT1G01320.1"; gene_id "AT1G01320";
1	Araport11	CDS	123579	123669	.	-	1	transcript_id "AT1G01320.1"; gene_id "AT1G01320";
1	Araport11	CDS	123785	123897	.	-	0	transcript_id "AT1G01320.1"; gene_id "AT1G01320";
1	Araport11	CDS	123992	124123	.	-	0	transcript_id "AT1G01320.1"; gene_id "AT1G01320";
1	Araport11	CDS	124211	124394	.	-	1	transcript_id "AT1G01320.1"; gene_id "AT1G01320";
1	Araport11	CDS	124499	124632	.	-	0	transcript_id "AT1G01320.1"; gene_id "AT1G01320";
1	Araport11	CDS	124714	124818	.	-	0	transcript_id "AT1G01320.1"; gene_id "AT1G01320";
1	Araport11	CDS	124921	125046	.	-	0	transcript_id "AT1G01320.1"; gene_id "AT1G01320";
1	Araport11	CDS	125134	125226	.	-	0	transcript_id "AT1G01320.1"; gene_id "AT1G01320";
1	Araport11	CDS	125329	125655	.	-	0	transcript_id "AT1G01320.1"; gene_id "AT1G01320";
1	Araport11	CDS	125742	125843	.	-	0	transcript_id "AT1G01320.1"; gene_id "AT1G01320";
1	Araport11	CDS	125936	125998	.	-	0	transcript_id "AT1G01320.1"; gene_id "AT1G01320";
1	Araport11	CDS	126076	126589	.	-	1	transcript_id "AT1G01320.1"; gene_id "AT1G01320";
1	Araport11	CDS	126686	126840	.	-	0	transcript_id "AT1G01320.1"; gene_id "AT1G01320";
1	Araport11	CDS	126935	127453	.	-	0	transcript_id "AT1G01320.1"; gene_id "AT1G01320";
1	Araport11	CDS	127532	127573	.	-	0	transcript_id "AT1G01320.1"; gene_id "AT1G01320";
1	Araport11	CDS	127651	127782	.	-	0	transcript_id "AT1G01320.1"; gene_id "AT1G01320";
1	Araport11	CDS	127868	127935	.	-	2	transcript_id "AT1G01320.1"; gene_id "AT1G01320";
1	Araport11	CDS	128028	128312	.	-	2	transcript_id "AT1G01320.1"; gene_id "AT1G01320";
1	Araport11	CDS	128479	128551	.	-	0	transcript_id "AT1G01320.1"; gene_id "AT1G01320";
1	Araport11	CDS	128968	129060	.	-	0	transcript_id "AT1G01320.1"; gene_id "AT1G01320";
1	Araport11	CDS	129853	129914	.	-	2	transcript_id "AT1G01320.1"; gene_id "AT1G01320";
1	Araport11	CDS	130039	130099	.	-	0	transcript_id "AT1G01320.1"; gene_id "AT1G01320";
1	Araport11	transcript	120154	121130	.	+	.	transcript_id "AT1G01310.1"; gene_id "AT1G01310"; locus "RLOC_00000039";
1	Araport11	exon	120154	121130	.	+	.	transcript_id "AT1G01310.1"; gene_id "AT1G01310";
1	Araport11	CDS	120221	120946	.	+	0	transcript_id "AT1G01310.1"; gene_id "AT1G01310";
1	Araport11	transcript	130736	130858	.	+	.	transcript_id "AT1G01335.1"; gene_id "AT1G01335"; locus "RLOC_00000040";
1	Araport11	exon	130736	130858	219	+	.	transcript_id "AT1G01335.1"; gene_id "AT1G01335";
1	Araport11	CDS	130736	130858	.	+	0	transcript_id "AT1G01335.1"; gene_id "AT1G01335";
1	StringTie	transcript	132270	135846	1000	-	.	transcript_id "STRG.22.2"; gene_id "STRG.22"; locus "RLOC_00000041";
1	StringTie	exon	132270	133218	1000	-	.	transcript_id "STRG.22.2"; gene_id "STRG.22";
1	StringTie	exon	133303	133539	1000	-	.	transcript_id "STRG.22.2"; gene_id "STRG.22";
1	StringTie	exon	133641	133752	1000	-	.	transcript_id "STRG.22.2"; gene_id "STRG.22";
1	StringTie	exon	133911	134206	1000	-	.	transcript_id "STRG.22.2"; gene_id "STRG.22";
1	StringTie	exon	134289	134501	1000	-	.	transcript_id "STRG.22.2"; gene_id "STRG.22";
1	StringTie	exon	134582	135846	1000	-	.	transcript_id "STRG.22.2"; gene_id "STRG.22";
1	Araport11	transcript	132270	135924	.	-	.	transcript_id "AT1G01340.2"; gene_id "AT1G01340"; locus "RLOC_00000041";
1	Araport11	exon	132270	132744	.	-	.	transcript_id "AT1G01340.2"; gene_id "AT1G01340";
1	Araport11	exon	132824	133218	.	-	.	transcript_id "AT1G01340.2"; gene_id "AT1G01340";
1	Araport11	exon	133303	133539	.	-	.	transcript_id "AT1G01340.2"; gene_id "AT1G01340";
1	Araport11	exon	133641	133752	.	-	.	transcript_id "AT1G01340.2"; gene_id "AT1G01340";
1	Araport11	exon	133911	134206	.	-	.	transcript_id "AT1G01340.2"; gene_id "AT1G01340";
1	Araport11	exon	134289	134501	.	-	.	transcript_id "AT1G01340.2"; gene_id "AT1G01340";
1	Araport11	exon	134582	135104	.	-	.	transcript_id "AT1G01340.2"; gene_id "AT1G01340";
1	Araport11	exon	135188	135269	.	-	.	transcript_id "AT1G01340.2"; gene_id "AT1G01340";
1	Araport11	exon	135708	135924	.	-	.	transcript_id "AT1G01340.2"; gene_id "AT1G01340";
1	Araport11	CDS	132414	132744	.	-	1	transcript_id "AT1G01340.2"; gene_id "AT1G01340";
1	Araport11	CDS	132824	133218	.	-	0	transcript_id "AT1G01340.2"; gene_id "AT1G01340";
1	Araport11	CDS	133303	133539	.	-	0	transcript_id "AT1G01340.2"; gene_id "AT1G01340";
1	Araport11	CDS	133641	133752	.	-	1	transcript_id "AT1G01340.2"; gene_id "AT1G01340";
1	Araport11	CDS	133911	134206	.	-	0	transcript_id "AT1G01340.2"; gene_id "AT1G01340";
1	Araport11	CDS	134289	134501	.	-	0	transcript_id "AT1G01340.2"; gene_id "AT1G01340";
1	Araport11	CDS	134582	135104	.	-	1	transcript_id "AT1G01340.2"; gene_id "AT1G01340";
1	Araport11	CDS	135188	135216	.	-	0	transcript_id "AT1G01340.2"; gene_id "AT1G01340";
1	Araport11	transcript	132328	135322	.	-	.	transcript_id "AT1G01340.1"; gene_id "AT1G01340"; locus "RLOC_00000041";
1	Araport11	exon	132328	132744	.	-	.	transcript_id "AT1G01340.1"; gene_id "AT1G01340";
1	Araport11	exon	132824	133218	.	-	.	transcript_id "AT1G01340.1"; gene_id "AT1G01340";
1	Araport11	exon	133303	133539	.	-	.	transcript_id "AT1G01340.1"; gene_id "AT1G01340";
1	Araport11	exon	133641	133752	.	-	.	transcript_id "AT1G01340.1"; gene_id "AT1G01340";
1	Araport11	exon	133911	134206	.	-	.	transcript_id "AT1G01340.1"; gene_id "AT1G01340";
1	Araport11	exon	134289	134501	.	-	.	transcript_id "AT1G01340.1"; gene_id "AT1G01340";
1	Araport11	exon	134582	135322	.	-	.	transcript_id "AT1G01340.1"; gene_id "AT1G01340";
1	Araport11	CDS	132414	132744	.	-	1	transcript_id "AT1G01340.1"; gene_id "AT1G01340";
1	Araport11	CDS	132824	133218	.	-	0	transcript_id "AT1G01340.1"; gene_id "AT1G01340";
1	Araport11	CDS	133303	133539	.	-	0	transcript_id "AT1G01340.1"; gene_id "AT1G01340";
1	Araport11	CDS	133641	133752	.	-	1	transcript_id "AT1G01340.1"; gene_id "AT1G01340";
1	Araport11	CDS	133911	134206	.	-	0	transcript_id "AT1G01340.1"; gene_id "AT1G01340";
1	Araport11	CDS	134289	134501	.	-	0	transcript_id "AT1G01340.1"; gene_id "AT1G01340";
1	Araport11	CDS	134582	135118	.	-	0	transcript_id "AT1G01340.1"; gene_id "AT1G01340";
1	Araport11	transcript	136090	138162	.	+	.	transcript_id "AT1G01350.1"; gene_id "AT1G01350"; locus "RLOC_00000042";
1	Araport11	exon	136090	136234	.	+	.	transcript_id "AT1G01350.1"; gene_id "AT1G01350";
1	Araport11	exon	136667	136816	.	+	.	transcript_id "AT1G01350.1"; gene_id "AT1G01350";
1	Araport11	exon	136935	137758	.	+	.	transcript_id "AT1G01350.1"; gene_id "AT1G01350";
1	Araport11	exon	137848	138162	.	+	.	transcript_id "AT1G01350.1"; gene_id "AT1G01350";
1	Araport11	CDS	136732	136816	.	+	0	transcript_id "AT1G01350.1"; gene_id "AT1G01350";
1	Araport11	CDS	136935	137758	.	+	2	transcript_id "AT1G01350.1"; gene_id "AT1G01350";
1	Araport11	CDS	137848	137970	.	+	0	transcript_id "AT1G01350.1"; gene_id "AT1G01350";
1	StringTie	transcript	136137	138163	1000	+	.	transcript_id "STRG.24.2"; gene_id "STRG.24"; locus "RLOC_00000042";
1	StringTie	exon	136137	136234	1000	+	.	transcript_id "STRG.24.2"; gene_id "STRG.24";
1	StringTie	exon	136667	136816	1000	+	.	transcript_id "STRG.24.2"; gene_id "STRG.24";
1	StringTie	exon	136935	138163	1000	+	.	transcript_id "STRG.24.2"; gene_id "STRG.24";
1	Araport11	transcript	138489	139671	.	+	.	transcript_id "AT1G01355.2"; gene_id "AT1G01355"; locus "RLOC_00000043";
1	Araport11	exon	138489	138778	.	+	.	transcript_id "AT1G01355.2"; gene_id "AT1G01355";
1	Araport11	exon	138875	138914	.	+	.	transcript_id "AT1G01355.2"; gene_id "AT1G01355";
1	Araport11	exon	138989	139114	.	+	.	transcript_id "AT1G01355.2"; gene_id "AT1G01355";
1	Araport11	exon	139203	139345	.	+	.	transcript_id "AT1G01355.2"; gene_id "AT1G01355";
1	Araport11	exon	139488	139671	.	+	.	transcript_id "AT1G01355.2"; gene_id "AT1G01355";
1	Araport11	CDS	138722	138778	.	+	0	transcript_id "AT1G01355.2"; gene_id "AT1G01355";
1	Araport11	CDS	138875	138914	.	+	0	transcript_id "AT1G01355.2"; gene_id "AT1G01355";
1	Araport11	CDS	138989	139114	.	+	2	transcript_id "AT1G01355.2"; gene_id "AT1G01355";
1	Araport11	CDS	139203	139345	.	+	2	transcript_id "AT1G01355.2"; gene_id "AT1G01355";
1	Araport11	CDS	139488	139568	.	+	0	transcript_id "AT1G01355.2"; gene_id "AT1G01355";
1	Araport11	transcript	138513	139651	.	+	.	transcript_id "AT1G01355.3"; gene_id "AT1G01355"; locus "RLOC_00000043";
1	Araport11	exon	138513	138541	.	+	.	transcript_id "AT1G01355.3"; gene_id "AT1G01355";
1	Araport11	exon	138597	138778	.	+	.	transcript_id "AT1G01355.3"; gene_id "AT1G01355";
1	Araport11	exon	138875	139114	.	+	.	transcript_id "AT1G01355.3"; gene_id "AT1G01355";
1	Araport11	exon	139203	139345	.	+	.	transcript_id "AT1G01355.3"; gene_id "AT1G01355";
1	Araport11	exon	139488	139651	.	+	.	transcript_id "AT1G01355.3"; gene_id "AT1G01355";
1	Araport11	CDS	138513	138541	.	+	0	transcript_id "AT1G01355.3"; gene_id "AT1G01355";
1	Araport11	CDS	138597	138778	.	+	1	transcript_id "AT1G01355.3"; gene_id "AT1G01355";
1	Araport11	CDS	138875	139114	.	+	2	transcript_id "AT1G01355.3"; gene_id "AT1G01355";
1	Araport11	CDS	139203	139345	.	+	2	transcript_id "AT1G01355.3"; gene_id "AT1G01355";
1	Araport11	CDS	139488	139568	.	+	0	transcript_id "AT1G01355.3"; gene_id "AT1G01355";
1	Araport11	transcript	138513	139680	.	+	.	transcript_id "AT1G01355.1"; gene_id "AT1G01355"; locus "RLOC_00000043";
1	Araport11	exon	138513	138541	.	+	.	transcript_id "AT1G01355.1"; gene_id "AT1G01355";
1	Araport11	exon	138597	138778	.	+	.	transcript_id "AT1G01355.1"; gene_id "AT1G01355";
1	Araport11	exon	138863	139114	.	+	.	transcript_id "AT1G01355.1"; gene_id "AT1G01355";
1	Araport11	exon	139203	139345	.	+	.	transcript_id "AT1G01355.1"; gene_id "AT1G01355";
1	Araport11	exon	139488	139680	.	+	.	transcript_id "AT1G01355.1"; gene_id "AT1G01355";
1	Araport11	CDS	138513	138541	.	+	0	transcript_id "AT1G01355.1"; gene_id "AT1G01355";
1	Araport11	CDS	138597	138778	.	+	1	transcript_id "AT1G01355.1"; gene_id "AT1G01355";
1	Araport11	CDS	138863	139114	.	+	2	transcript_id "AT1G01355.1"; gene_id "AT1G01355";
1	Araport11	CDS	139203	139345	.	+	2	transcript_id "AT1G01355.1"; gene_id "AT1G01355";
1	Araport11	CDS	139488	139568	.	+	0	transcript_id "AT1G01355.1"; gene_id "AT1G01355";
1	Araport11	transcript	141870	143261	.	+	.	transcript_id "AT1G01360.1"; gene_id "AT1G01360"; locus "RLOC_00000044";
1	Araport11	exon	141870	142281	.	+	.	transcript_id "AT1G01360.1"; gene_id "AT1G01360";
1	Araport11	exon	142424	142639	.	+	.	transcript_id "AT1G01360.1"; gene_id "AT1G01360";
1	Araport11	exon	142711	143261	.	+	.	transcript_id "AT1G01360.1"; gene_id "AT1G01360";
1	Araport11	CDS	142138	142281	.	+	0	transcript_id "AT1G01360.1"; gene_id "AT1G01360";
1	Araport11	CDS	142424	142639	.	+	0	transcript_id "AT1G01360.1"; gene_id "AT1G01360";
1	Araport11	CDS	142711	142914	.	+	0	transcript_id "AT1G01360.1"; gene_id "AT1G01360";
1	Araport11	transcript	143489	146042	.	+	.	transcript_id "AT1G01370.1"; gene_id "AT1G01370"; locus "RLOC_00000045";
1	Araport11	exon	143489	143676	.	+	.	transcript_id "AT1G01370.1"; gene_id "AT1G01370";
1	Araport11	exon	143764	143824	.	+	.	transcript_id "AT1G01370.1"; gene_id "AT1G01370";
1	Araport11	exon	143934	143977	.	+	.	transcript_id "AT1G01370.1"; gene_id "AT1G01370";
1	Araport11	exon	144064	144109	.	+	.	transcript_id "AT1G01370.1"; gene_id "AT1G01370";
1	Araport11	exon	144193	144227	.	+	.	transcript_id "AT1G01370.1"; gene_id "AT1G01370";
1	Araport11	exon	144315	144351	.	+	.	transcript_id "AT1G01370.1"; gene_id "AT1G01370";
1	Araport11	exon	144447	144559	.	+	.	transcript_id "AT1G01370.1"; gene_id "AT1G01370";
1	Araport11	exon	144927	145004	.	+	.	transcript_id "AT1G01370.1"; gene_id "AT1G01370";
1	Araport11	exon	145132	145207	.	+	.	transcript_id "AT1G01370.1"; gene_id "AT1G01370";
1	Araport11	exon	145345	146042	.	+	.	transcript_id "AT1G01370.1"; gene_id "AT1G01370";
1	Araport11	CDS	143773	143824	.	+	0	transcript_id "AT1G01370.1"; gene_id "AT1G01370";
1	Araport11	CDS	143934	143977	.	+	2	transcript_id "AT1G01370.1"; gene_id "AT1G01370";
1	Araport11	CDS	144064	144109	.	+	0	transcript_id "AT1G01370.1"; gene_id "AT1G01370";
1	Araport11	CDS	144193	144227	.	+	2	transcript_id "AT1G01370.1"; gene_id "AT1G01370";
1	Araport11	CDS	144315	144351	.	+	0	transcript_id "AT1G01370.1"; gene_id "AT1G01370";
1	Araport11	CDS	144447	144559	.	+	2	transcript_id "AT1G01370.1"; gene_id "AT1G01370";
1	Araport11	CDS	144927	145004	.	+	0	transcript_id "AT1G01370.1"; gene_id "AT1G01370";
1	Araport11	CDS	145132	145207	.	+	0	transcript_id "AT1G01370.1"; gene_id "AT1G01370";
1	Araport11	CDS	145345	145400	.	+	2	transcript_id "AT1G01370.1"; gene_id "AT1G01370";
1	Araport11	transcript	143489	146042	.	+	.	transcript_id "AT1G01370.2"; gene_id "AT1G01370"; locus "RLOC_00000045";
1	Araport11	exon	143489	143824	.	+	.	transcript_id "AT1G01370.2"; gene_id "AT1G01370";
1	Araport11	exon	143934	143977	.	+	.	transcript_id "AT1G01370.2"; gene_id "AT1G01370";
1	Araport11	exon	144064	144109	.	+	.	transcript_id "AT1G01370.2"; gene_id "AT1G01370";
1	Araport11	exon	144193	144227	.	+	.	transcript_id "AT1G01370.2"; gene_id "AT1G01370";
1	Araport11	exon	144315	144351	.	+	.	transcript_id "AT1G01370.2"; gene_id "AT1G01370";
1	Araport11	exon	144447	144559	.	+	.	transcript_id "AT1G01370.2"; gene_id "AT1G01370";
1	Araport11	exon	144927	145004	.	+	.	transcript_id "AT1G01370.2"; gene_id "AT1G01370";
1	Araport11	exon	145132	145207	.	+	.	transcript_id "AT1G01370.2"; gene_id "AT1G01370";
1	Araport11	exon	145345	146042	.	+	.	transcript_id "AT1G01370.2"; gene_id "AT1G01370";
1	Araport11	CDS	143773	143824	.	+	0	transcript_id "AT1G01370.2"; gene_id "AT1G01370";
1	Araport11	CDS	143934	143977	.	+	2	transcript_id "AT1G01370.2"; gene_id "AT1G01370";
1	Araport11	CDS	144064	144109	.	+	0	transcript_id "AT1G01370.2"; gene_id "AT1G01370";
1	Araport11	CDS	144193	144227	.	+	2	transcript_id "AT1G01370.2"; gene_id "AT1G01370";
1	Araport11	CDS	144315	144351	.	+	0	transcript_id "AT1G01370.2"; gene_id "AT1G01370";
1	Araport11	CDS	144447	144559	.	+	2	transcript_id "AT1G01370.2"; gene_id "AT1G01370";
1	Araport11	CDS	144927	145004	.	+	0	transcript_id "AT1G01370.2"; gene_id "AT1G01370";
1	Araport11	CDS	145132	145207	.	+	0	transcript_id "AT1G01370.2"; gene_id "AT1G01370";
1	Araport11	CDS	145345	145400	.	+	2	transcript_id "AT1G01370.2"; gene_id "AT1G01370";
1	Araport11	transcript	143489	146479	.	+	.	transcript_id "AT1G01370.3"; gene_id "AT1G01370"; locus "RLOC_00000045";
1	Araport11	exon	143489	143676	.	+	.	transcript_id "AT1G01370.3"; gene_id "AT1G01370";
1	Araport11	exon	143764	143824	.	+	.	transcript_id "AT1G01370.3"; gene_id "AT1G01370";
1	Araport11	exon	143934	143977	.	+	.	transcript_id "AT1G01370.3"; gene_id "AT1G01370";
1	Araport11	exon	144064	144109	.	+	.	transcript_id "AT1G01370.3"; gene_id "AT1G01370";
1	Araport11	exon	144193	144227	.	+	.	transcript_id "AT1G01370.3"; gene_id "AT1G01370";
1	Araport11	exon	144315	144351	.	+	.	transcript_id "AT1G01370.3"; gene_id "AT1G01370";
1	Araport11	exon	144447	144559	.	+	.	transcript_id "AT1G01370.3"; gene_id "AT1G01370";
1	Araport11	exon	144927	145004	.	+	.	transcript_id "AT1G01370.3"; gene_id "AT1G01370";
1	Araport11	exon	145132	145207	.	+	.	transcript_id "AT1G01370.3"; gene_id "AT1G01370";
1	Araport11	exon	145345	145435	.	+	.	transcript_id "AT1G01370.3"; gene_id "AT1G01370";
1	Araport11	exon	146164	146479	.	+	.	transcript_id "AT1G01370.3"; gene_id "AT1G01370";
1	Araport11	CDS	143773	143824	.	+	0	transcript_id "AT1G01370.3"; gene_id "AT1G01370";
1	Araport11	CDS	143934	143977	.	+	2	transcript_id "AT1G01370.3"; gene_id "AT1G01370";
1	Araport11	CDS	144064	144109	.	+	0	transcript_id "AT1G01370.3"; gene_id "AT1G01370";
1	Araport11	CDS	144193	144227	.	+	2	transcript_id "AT1G01370.3"; gene_id "AT1G01370";
1	Araport11	CDS	144315	144351	.	+	0	transcript_id "AT1G01370.3"; gene_id "AT1G01370";
1	Araport11	CDS	144447	144559	.	+	2	transcript_id "AT1G01370.3"; gene_id "AT1G01370";
1	Araport11	CDS	144927	145004	.	+	0	transcript_id "AT1G01370.3"; gene_id "AT1G01370";
1	Araport11	CDS	145132	145207	.	+	0	transcript_id "AT1G01370.3"; gene_id "AT1G01370";
1	Araport11	CDS	145345	145400	.	+	2	transcript_id "AT1G01370.3"; gene_id "AT1G01370";
1	Araport11	transcript	143522	145676	.	+	.	transcript_id "AT1G01370.4"; gene_id "AT1G01370"; locus "RLOC_00000045";
1	Araport11	exon	143522	143676	.	+	.	transcript_id "AT1G01370.4"; gene_id "AT1G01370";
1	Araport11	exon	143761	143824	.	+	.	transcript_id "AT1G01370.4"; gene_id "AT1G01370";
1	Araport11	exon	143934	143977	.	+	.	transcript_id "AT1G01370.4"; gene_id "AT1G01370";
1	Araport11	exon	144064	144109	.	+	.	transcript_id "AT1G01370.4"; gene_id "AT1G01370";
1	Araport11	exon	144193	144227	.	+	.	transcript_id "AT1G01370.4"; gene_id "AT1G01370";
1	Araport11	exon	144315	144351	.	+	.	transcript_id "AT1G01370.4"; gene_id "AT1G01370";
1	Araport11	exon	144447	144559	.	+	.	transcript_id "AT1G01370.4"; gene_id "AT1G01370";
1	Araport11	exon	144927	145004	.	+	.	transcript_id "AT1G01370.4"; gene_id "AT1G01370";
1	Araport11	exon	145132	145207	.	+	.	transcript_id "AT1G01370.4"; gene_id "AT1G01370";
1	Araport11	exon	145345	145676	.	+	.	transcript_id "AT1G01370.4"; gene_id "AT1G01370";
1	Araport11	CDS	143773	143824	.	+	0	transcript_id "AT1G01370.4"; gene_id "AT1G01370";
1	Araport11	CDS	143934	143977	.	+	2	transcript_id "AT1G01370.4"; gene_id "AT1G01370";
1	Araport11	CDS	144064	144109	.	+	0	transcript_id "AT1G01370.4"; gene_id "AT1G01370";
1	Araport11	CDS	144193	144227	.	+	2	transcript_id "AT1G01370.4"; gene_id "AT1G01370";
1	Araport11	CDS	144315	144351	.	+	0	transcript_id "AT1G01370.4"; gene_id "AT1G01370";
1	Araport11	CDS	144447	144559	.	+	2	transcript_id "AT1G01370.4"; gene_id "AT1G01370";
1	Araport11	CDS	144927	145004	.	+	0	transcript_id "AT1G01370.4"; gene_id "AT1G01370";
1	Araport11	CDS	145132	145207	.	+	0	transcript_id "AT1G01370.4"; gene_id "AT1G01370";
1	Araport11	CDS	145345	145400	.	+	2	transcript_id "AT1G01370.4"; gene_id "AT1G01370";
1	StringTie	transcript	143543	146518	1000	+	.	transcript_id "STRG.26.2"; gene_id "STRG.26"; locus "RLOC_00000045";
1	StringTie	exon	143543	143824	1000	+	.	transcript_id "STRG.26.2"; gene_id "STRG.26";
1	StringTie	exon	143934	143977	1000	+	.	transcript_id "STRG.26.2"; gene_id "STRG.26";
1	StringTie	exon	144064	144109	1000	+	.	transcript_id "STRG.26.2"; gene_id "STRG.26";
1	StringTie	exon	144193	144227	1000	+	.	transcript_id "STRG.26.2"; gene_id "STRG.26";
1	StringTie	exon	144315	144351	1000	+	.	transcript_id "STRG.26.2"; gene_id "STRG.26";
1	StringTie	exon	144447	144559	1000	+	.	transcript_id "STRG.26.2"; gene_id "STRG.26";
1	StringTie	exon	144927	145004	1000	+	.	transcript_id "STRG.26.2"; gene_id "STRG.26";
1	StringTie	exon	145132	145207	1000	+	.	transcript_id "STRG.26.2"; gene_id "STRG.26";
1	StringTie	exon	145345	145435	1000	+	.	transcript_id "STRG.26.2"; gene_id "STRG.26";
1	StringTie	exon	146164	146518	1000	+	.	transcript_id "STRG.26.2"; gene_id "STRG.26";
1	Araport11	transcript	147043	148014	.	+	.	transcript_id "AT1G01380.1"; gene_id "AT1G01380"; locus "RLOC_00000046";
1	Araport11	exon	147043	147333	.	+	.	transcript_id "AT1G01380.1"; gene_id "AT1G01380";
1	Araport11	exon	147452	147539	.	+	.	transcript_id "AT1G01380.1"; gene_id "AT1G01380";
1	Araport11	exon	147644	148014	.	+	.	transcript_id "AT1G01380.1"; gene_id "AT1G01380";
1	Araport11	CDS	147267	147333	.	+	0	transcript_id "AT1G01380.1"; gene_id "AT1G01380";
1	Araport11	CDS	147452	147539	.	+	2	transcript_id "AT1G01380.1"; gene_id "AT1G01380";
1	Araport11	CDS	147644	147740	.	+	1	transcript_id "AT1G01380.1"; gene_id "AT1G01380";
1	Araport11	transcript	147043	148014	.	+	.	transcript_id "AT1G01380.2"; gene_id "AT1G01380"; locus "RLOC_00000046";
1	Araport11	exon	147043	147333	.	+	.	transcript_id "AT1G01380.2"; gene_id "AT1G01380";
1	Araport11	exon	147452	148014	.	+	.	transcript_id "AT1G01380.2"; gene_id "AT1G01380";
1	Araport11	CDS	147267	147333	.	+	0	transcript_id "AT1G01380.2"; gene_id "AT1G01380";
1	Araport11	CDS	147452	147567	.	+	2	transcript_id "AT1G01380.2"; gene_id "AT1G01380";
1	Araport11	transcript	147153	147942	.	+	.	transcript_id "AT1G01380.3"; gene_id "AT1G01380"; locus "RLOC_00000046";
1	Araport11	exon	147153	147333	.	+	.	transcript_id "AT1G01380.3"; gene_id "AT1G01380";
1	Araport11	exon	147452	147528	.	+	.	transcript_id "AT1G01380.3"; gene_id "AT1G01380";
1	Araport11	exon	147644	147942	.	+	.	transcript_id "AT1G01380.3"; gene_id "AT1G01380";
1	Araport11	CDS	147267	147333	.	+	0	transcript_id "AT1G01380.3"; gene_id "AT1G01380";
1	Araport11	CDS	147452	147528	.	+	2	transcript_id "AT1G01380.3"; gene_id "AT1G01380";
1	Araport11	CDS	147644	147694	.	+	0	transcript_id "AT1G01380.3"; gene_id "AT1G01380";
1	Araport11	transcript	148013	149848	.	-	.	transcript_id "AT1G01390.2"; gene_id "AT1G01390"; locus "RLOC_00000047";
1	Araport11	exon	148013	149848	.	-	.	transcript_id "AT1G01390.2"; gene_id "AT1G01390";
1	Araport11	CDS	148319	149812	.	-	0	transcript_id "AT1G01390.2"; gene_id "AT1G01390";
1	Araport11	transcript	150689	152210	.	-	.	transcript_id "AT1G01400.1"; gene_id "AT1G01400"; locus "RLOC_00000048";
1	Araport11	exon	150689	151298	.	-	.	transcript_id "AT1G01400.1"; gene_id "AT1G01400";
1	Araport11	exon	151393	151731	.	-	.	transcript_id "AT1G01400.1"; gene_id "AT1G01400";
1	Araport11	exon	151932	152002	.	-	.	transcript_id "AT1G01400.1"; gene_id "AT1G01400";
1	Araport11	exon	152086	152210	.	-	.	transcript_id "AT1G01400.1"; gene_id "AT1G01400";
1	Araport11	CDS	151158	151298	.	-	0	transcript_id "AT1G01400.1"; gene_id "AT1G01400";
1	Araport11	CDS	151393	151731	.	-	0	transcript_id "AT1G01400.1"; gene_id "AT1G01400";
1	Araport11	CDS	151932	152002	.	-	2	transcript_id "AT1G01400.1"; gene_id "AT1G01400";
1	Araport11	CDS	152086	152149	.	-	0	transcript_id "AT1G01400.1"; gene_id "AT1G01400";
1	Araport11	transcript	153113	154198	.	+	.	transcript_id "AT1G01410.1"; gene_id "AT1G01410"; locus "RLOC_00000049";
1	Araport11	exon	153113	154198	.	+	.	transcript_id "AT1G01410.1"; gene_id "AT1G01410";
1	Araport11	CDS	153113	154198	.	+	0	transcript_id "AT1G01410.1"; gene_id "AT1G01410";
1	StringTie	transcript	154176	156058	1000	-	.	transcript_id "STRG.35.1"; gene_id "STRG.35"; locus "RLOC_00000050";
1	StringTie	exon	154176	156058	1000	-	.	transcript_id "STRG.35.1"; gene_id "STRG.35";
1	StringTie	CDS	154566	156020	.	-	0	transcript_id "STRG.35.1"; gene_id "STRG.35";
1	Araport11	transcript	156477	158823	.	-	.	transcript_id "AT1G01430.1"; gene_id "AT1G01430"; locus "RLOC_00000051";
1	Araport11	exon	156477	157756	.	-	.	transcript_id "AT1G01430.1"; gene_id "AT1G01430";
1	Araport11	exon	157829	158112	.	-	.	transcript_id "AT1G01430.1"; gene_id "AT1G01430";
1	Araport11	exon	158254	158823	.	-	.	transcript_id "AT1G01430.1"; gene_id "AT1G01430";
1	Araport11	CDS	156953	157756	.	-	0	transcript_id "AT1G01430.1"; gene_id "AT1G01430";
1	Araport11	CDS	157829	158112	.	-	2	transcript_id "AT1G01430.1"; gene_id "AT1G01430";
1	Araport11	CDS	158254	158536	.	-	0	transcript_id "AT1G01430.1"; gene_id "AT1G01430";
1	StringTie	transcript	159619	162823	1000	-	.	transcript_id "STRG.37.2"; gene_id "STRG.37"; locus "RLOC_00000052";
1	StringTie	exon	159619	159992	1000	-	.	transcript_id "STRG.37.2"; gene_id "STRG.37";
1	StringTie	exon	160079	160478	1000	-	.	transcript_id "STRG.37.2"; gene_id "STRG.37";
1	StringTie	exon	160568	162280	1000	-	.	transcript_id "STRG.37.2"; gene_id "STRG.37";
1	StringTie	exon	162487	162823	1000	-	.	transcript_id "STRG.37.2"; gene_id "STRG.37";
1	StringTie	transcript	159619	162823	1000	-	.	transcript_id "STRG.37.3"; gene_id "STRG.37"; locus "RLOC_00000052";
1	StringTie	exon	159619	159992	1000	-	.	transcript_id "STRG.37.3"; gene_id "STRG.37";
1	StringTie	exon	160079	160302	1000	-	.	transcript_id "STRG.37.3"; gene_id "STRG.37";
1	StringTie	exon	160418	162280	1000	-	.	transcript_id "STRG.37.3"; gene_id "STRG.37";
1	StringTie	exon	162487	162823	1000	-	.	transcript_id "STRG.37.3"; gene_id "STRG.37";
1	Araport11	transcript	159628	162953	.	-	.	transcript_id "AT1G01440.1"; gene_id "AT1G01440"; locus "RLOC_00000052";
1	Araport11	exon	159628	159992	.	-	.	transcript_id "AT1G01440.1"; gene_id "AT1G01440";
1	Araport11	exon	160079	160302	.	-	.	transcript_id "AT1G01440.1"; gene_id "AT1G01440";
1	Araport11	exon	160418	160478	.	-	.	transcript_id "AT1G01440.1"; gene_id "AT1G01440";
1	Araport11	exon	160568	162280	.	-	.	transcript_id "AT1G01440.1"; gene_id "AT1G01440";
1	Araport11	exon	162487	162953	.	-	.	transcript_id "AT1G01440.1"; gene_id "AT1G01440";
1	Araport11	CDS	159935	159992	.	-	1	transcript_id "AT1G01440.1"; gene_id "AT1G01440";
1	Araport11	CDS	160079	160302	.	-	0	transcript_id "AT1G01440.1"; gene_id "AT1G01440";
1	Araport11	CDS	160418	160478	.	-	1	transcript_id "AT1G01440.1"; gene_id "AT1G01440";
1	Araport11	CDS	160568	162219	.	-	0	transcript_id "AT1G01440.1"; gene_id "AT1G01440";
1	Araport11	transcript	163278	166353	.	+	.	transcript_id "AT1G01448.1"; gene_id "AT1G01448"; locus "RLOC_00000053";
1	Araport11	exon	163278	163516	.	+	.	transcript_id "AT1G01448.1"; gene_id "AT1G01448";
1	Araport11	exon	163934	164103	.	+	.	transcript_id "AT1G01448.1"; gene_id "AT1G01448";
1	Araport11	exon	164225	164686	.	+	.	transcript_id "AT1G01448.1"; gene_id "AT1G01448";
1	Araport11	exon	164771	165380	.	+	.	transcript_id "AT1G01448.1"; gene_id "AT1G01448";
1	Araport11	exon	165449	166353	.	+	.	transcript_id "AT1G01448.1"; gene_id "AT1G01448";
1	Araport11	transcript	163278	166353	.	+	.	transcript_id "AT1G01448.2"; gene_id "AT1G01448"; locus "RLOC_00000053";
1	Araport11	exon	163278	163516	.	+	.	transcript_id "AT1G01448.2"; gene_id "AT1G01448";
1	Araport11	exon	163934	164103	.	+	.	transcript_id "AT1G01448.2"; gene_id "AT1G01448";
1	Araport11	exon	164225	164686	.	+	.	transcript_id "AT1G01448.2"; gene_id "AT1G01448";
1	Araport11	exon	164771	165380	.	+	.	transcript_id "AT1G01448.2"; gene_id "AT1G01448";
1	Araport11	exon	165449	165656	.	+	.	transcript_id "AT1G01448.2"; gene_id "AT1G01448";
1	Araport11	exon	165769	166353	.	+	.	transcript_id "AT1G01448.2"; gene_id "AT1G01448";
1	Araport11	transcript	163302	166307	.	+	.	transcript_id "AT1G01448.3"; gene_id "AT1G01448"; locus "RLOC_00000053";
1	Araport11	exon	163302	163516	.	+	.	transcript_id "AT1G01448.3"; gene_id "AT1G01448";
1	Araport11	exon	163934	164103	.	+	.	transcript_id "AT1G01448.3"; gene_id "AT1G01448";
1	Araport11	exon	164225	164686	.	+	.	transcript_id "AT1G01448.3"; gene_id "AT1G01448";
1	Araport11	exon	164771	165380	.	+	.	transcript_id "AT1G01448.3"; gene_id "AT1G01448";
1	Araport11	exon	165449	165656	.	+	.	transcript_id "AT1G01448.3"; gene_id "AT1G01448";
1	Araport11	exon	165983	166307	.	+	.	transcript_id "AT1G01448.3"; gene_id "AT1G01448";
1	StringTie	transcript	163377	166336	1000	+	.	transcript_id "STRG.39.3"; gene_id "STRG.39"; locus "RLOC_00000053";
1	StringTie	exon	163377	163516	1000	+	.	transcript_id "STRG.39.3"; gene_id "STRG.39";
1	StringTie	exon	163934	164135	1000	+	.	transcript_id "STRG.39.3"; gene_id "STRG.39";
1	StringTie	exon	164225	164686	1000	+	.	transcript_id "STRG.39.3"; gene_id "STRG.39";
1	StringTie	exon	164771	166336	1000	+	.	transcript_id "STRG.39.3"; gene_id "STRG.39";
1	StringTie	transcript	163377	166336	1000	+	.	transcript_id "STRG.39.4"; gene_id "STRG.39"; locus "RLOC_00000053";
1	StringTie	exon	163377	163516	1000	+	.	transcript_id "STRG.39.4"; gene_id "STRG.39";
1	StringTie	exon	163934	164686	1000	+	.	transcript_id "STRG.39.4"; gene_id "STRG.39";
1	StringTie	exon	164771	165380	1000	+	.	transcript_id "STRG.39.4"; gene_id "STRG.39";
1	StringTie	exon	165449	166336	1000	+	.	transcript_id "STRG.39.4"; gene_id "STRG.39";
1	StringTie	transcript	163377	166336	1000	+	.	transcript_id "STRG.39.5"; gene_id "STRG.39"; locus "RLOC_00000053";
1	StringTie	exon	163377	163516	1000	+	.	transcript_id "STRG.39.5"; gene_id "STRG.39";
1	StringTie	exon	163934	164135	1000	+	.	transcript_id "STRG.39.5"; gene_id "STRG.39";
1	StringTie	exon	164225	164686	1000	+	.	transcript_id "STRG.39.5"; gene_id "STRG.39";
1	StringTie	exon	164771	165380	1000	+	.	transcript_id "STRG.39.5"; gene_id "STRG.39";
1	StringTie	exon	165449	166336	1000	+	.	transcript_id "STRG.39.5"; gene_id "STRG.39";
1	StringTie	transcript	163377	166336	1000	+	.	transcript_id "STRG.39.7"; gene_id "STRG.39"; locus "RLOC_00000053";
1	StringTie	exon	163377	163516	1000	+	.	transcript_id "STRG.39.7"; gene_id "STRG.39";
1	StringTie	exon	163934	164135	1000	+	.	transcript_id "STRG.39.7"; gene_id "STRG.39";
1	StringTie	exon	164225	164686	1000	+	.	transcript_id "STRG.39.7"; gene_id "STRG.39";
1	StringTie	exon	164771	165380	1000	+	.	transcript_id "STRG.39.7"; gene_id "STRG.39";
1	StringTie	exon	165449	165656	1000	+	.	transcript_id "STRG.39.7"; gene_id "STRG.39";
1	StringTie	exon	165769	166336	1000	+	.	transcript_id "STRG.39.7"; gene_id "STRG.39";
1	StringTie	transcript	163377	166336	1000	+	.	transcript_id "STRG.39.8"; gene_id "STRG.39"; locus "RLOC_00000053";
1	StringTie	exon	163377	163516	1000	+	.	transcript_id "STRG.39.8"; gene_id "STRG.39";
1	StringTie	exon	163934	164686	1000	+	.	transcript_id "STRG.39.8"; gene_id "STRG.39";
1	StringTie	exon	164771	166336	1000	+	.	transcript_id "STRG.39.8"; gene_id "STRG.39";
1	StringTie	transcript	163377	166336	1000	+	.	transcript_id "STRG.39.9"; gene_id "STRG.39"; locus "RLOC_00000053";
1	StringTie	exon	163377	164135	1000	+	.	transcript_id "STRG.39.9"; gene_id "STRG.39";
1	StringTie	exon	164225	164686	1000	+	.	transcript_id "STRG.39.9"; gene_id "STRG.39";
1	StringTie	exon	164771	165380	1000	+	.	transcript_id "STRG.39.9"; gene_id "STRG.39";
1	StringTie	exon	165449	166336	1000	+	.	transcript_id "STRG.39.9"; gene_id "STRG.39";
1	Araport11	transcript	164105	165517	.	-	.	transcript_id "AT1G01450.1"; gene_id "AT1G01450"; locus "RLOC_00000054";
1	Araport11	exon	164105	165517	.	-	.	transcript_id "AT1G01450.1"; gene_id "AT1G01450";
1	Araport11	CDS	164105	165517	.	-	0	transcript_id "AT1G01450.1"; gene_id "AT1G01450";
1	Araport11	transcript	166589	168088	.	-	.	transcript_id "AT1G01453.1"; gene_id "AT1G01453"; locus "RLOC_00000055";
1	Araport11	exon	166589	166871	.	-	.	transcript_id "AT1G01453.1"; gene_id "AT1G01453";
1	Araport11	exon	167014	168088	.	-	.	transcript_id "AT1G01453.1"; gene_id "AT1G01453";
1	Araport11	CDS	166853	166871	.	-	1	transcript_id "AT1G01453.1"; gene_id "AT1G01453";
1	Araport11	CDS	167014	167798	.	-	0	transcript_id "AT1G01453.1"; gene_id "AT1G01453";
1	Araport11	transcript	166618	167842	.	-	.	transcript_id "AT1G01453.2"; gene_id "AT1G01453"; locus "RLOC_00000055";
1	Araport11	exon	166618	167842	.	-	.	transcript_id "AT1G01453.2"; gene_id "AT1G01453";
1	Araport11	CDS	166929	167798	.	-	0	transcript_id "AT1G01453.2"; gene_id "AT1G01453";
1	Araport11	transcript	168559	171386	.	+	.	transcript_id "AT1G01460.1"; gene_id "AT1G01460"; locus "RLOC_00000056";
1	Araport11	exon	168559	168801	.	+	.	transcript_id "AT1G01460.1"; gene_id "AT1G01460";
1	Araport11	exon	169037	169257	.	+	.	transcript_id "AT1G01460.1"; gene_id "AT1G01460";
1	Araport11	exon	169347	169509	.	+	.	transcript_id "AT1G01460.1"; gene_id "AT1G01460";
1	Araport11	exon	169600	169710	.	+	.	transcript_id "AT1G01460.1"; gene_id "AT1G01460";
1	Araport11	exon	169806	169993	.	+	.	transcript_id "AT1G01460.1"; gene_id "AT1G01460";
1	Araport11	exon	170071	170162	.	+	.	transcript_id "AT1G01460.1"; gene_id "AT1G01460";
1	Araport11	exon	170266	170313	.	+	.	transcript_id "AT1G01460.1"; gene_id "AT1G01460";
1	Araport11	exon	170412	170507	.	+	.	transcript_id "AT1G01460.1"; gene_id "AT1G01460";
1	Araport11	exon	170622	170760	.	+	.	transcript_id "AT1G01460.1"; gene_id "AT1G01460";
1	Araport11	exon	170851	171386	.	+	.	transcript_id "AT1G01460.1"; gene_id "AT1G01460";
1	Araport11	CDS	169115	169257	.	+	0	transcript_id "AT1G01460.1"; gene_id "AT1G01460";
1	Araport11	CDS	169347	169509	.	+	1	transcript_id "AT1G01460.1"; gene_id "AT1G01460";
1	Araport11	CDS	169600	169710	.	+	0	transcript_id "AT1G01460.1"; gene_id "AT1G01460";
1	Araport11	CDS	169806	169993	.	+	0	transcript_id "AT1G01460.1"; gene_id "AT1G01460";
1	Araport11	CDS	170071	170162	.	+	1	transcript_id "AT1G01460.1"; gene_id "AT1G01460";
1	Araport11	CDS	170266	170313	.	+	2	transcript_id "AT1G01460.1"; gene_id "AT1G01460";
1	Araport11	CDS	170412	170507	.	+	2	transcript_id "AT1G01460.1"; gene_id "AT1G01460";
1	Araport11	CDS	170622	170760	.	+	2	transcript_id "AT1G01460.1"; gene_id "AT1G01460";
1	Araport11	CDS	170851	171154	.	+	1	transcript_id "AT1G01460.1"; gene_id "AT1G01460";
1	Araport11	transcript	171525	172948	.	-	.	transcript_id "AT1G01470.1"; gene_id "AT1G01470"; locus "RLOC_00000057";
1	Araport11	exon	171525	172544	.	-	.	transcript_id "AT1G01470.1"; gene_id "AT1G01470";
1	Araport11	exon	172621	172948	.	-	.	transcript_id "AT1G01470.1"; gene_id "AT1G01470";
1	Araport11	CDS	172295	172544	.	-	1	transcript_id "AT1G01470.1"; gene_id "AT1G01470";
1	Araport11	CDS	172621	172826	.	-	0	transcript_id "AT1G01470.1"; gene_id "AT1G01470";
1	StringTie	transcript	172175	172989	1000	+	.	transcript_id "STRG.41.1"; gene_id "STRG.41"; locus "RLOC_00000058";
1	StringTie	exon	172175	172521	1000	+	.	transcript_id "STRG.41.1"; gene_id "STRG.41";
1	StringTie	exon	172611	172989	1000	+	.	transcript_id "STRG.41.1"; gene_id "STRG.41";
1	Araport11	transcript	175706	178406	.	+	.	transcript_id "AT1G01480.1"; gene_id "AT1G01480"; locus "RLOC_00000059";
1	Araport11	exon	175706	176032	.	+	.	transcript_id "AT1G01480.1"; gene_id "AT1G01480";
1	Araport11	exon	176207	176338	.	+	.	transcript_id "AT1G01480.1"; gene_id "AT1G01480";
1	Araport11	exon	176592	176752	.	+	.	transcript_id "AT1G01480.1"; gene_id "AT1G01480";
1	Araport11	exon	177025	178406	.	+	.	transcript_id "AT1G01480.1"; gene_id "AT1G01480";
1	Araport11	CDS	175862	176032	.	+	0	transcript_id "AT1G01480.1"; gene_id "AT1G01480";
1	Araport11	CDS	176207	176338	.	+	0	transcript_id "AT1G01480.1"; gene_id "AT1G01480";
1	Araport11	CDS	176592	176752	.	+	0	transcript_id "AT1G01480.1"; gene_id "AT1G01480";
1	Araport11	CDS	177025	178051	.	+	1	transcript_id "AT1G01480.1"; gene_id "AT1G01480";
1	Araport11	transcript	176141	178400	.	+	.	transcript_id "AT1G01480.2"; gene_id "AT1G01480"; locus "RLOC_00000059";
1	Araport11	exon	176141	176338	.	+	.	transcript_id "AT1G01480.2"; gene_id "AT1G01480";
1	Araport11	exon	176592	176752	.	+	.	transcript_id "AT1G01480.2"; gene_id "AT1G01480";
1	Araport11	exon	177025	178400	.	+	.	transcript_id "AT1G01480.2"; gene_id "AT1G01480";
1	Araport11	CDS	176607	176752	.	+	0	transcript_id "AT1G01480.2"; gene_id "AT1G01480";
1	Araport11	CDS	177025	178051	.	+	1	transcript_id "AT1G01480.2"; gene_id "AT1G01480";
1	Araport11	transcript	180017	182534	.	-	.	transcript_id "AT1G01490.3"; gene_id "AT1G01490"; locus "RLOC_00000060";
1	Araport11	exon	180017	180852	.	-	.	transcript_id "AT1G01490.3"; gene_id "AT1G01490";
1	Araport11	exon	181347	182135	.	-	.	transcript_id "AT1G01490.3"; gene_id "AT1G01490";
1	Araport11	exon	182253	182534	.	-	.	transcript_id "AT1G01490.3"; gene_id "AT1G01490";
1	Araport11	CDS	180401	180835	.	-	0	transcript_id "AT1G01490.3"; gene_id "AT1G01490";
1	Araport11	transcript	180018	182497	.	-	.	transcript_id "AT1G01490.4"; gene_id "AT1G01490"; locus "RLOC_00000060";
1	Araport11	exon	180018	180852	.	-	.	transcript_id "AT1G01490.4"; gene_id "AT1G01490";
1	Araport11	exon	181347	181422	.	-	.	transcript_id "AT1G01490.4"; gene_id "AT1G01490";
1	Araport11	exon	181594	182135	.	-	.	transcript_id "AT1G01490.4"; gene_id "AT1G01490";
1	Araport11	exon	182253	182497	.	-	.	transcript_id "AT1G01490.4"; gene_id "AT1G01490";
1	Araport11	CDS	180401	180852	.	-	2	transcript_id "AT1G01490.4"; gene_id "AT1G01490";
1	Araport11	CDS	181347	181422	.	-	0	transcript_id "AT1G01490.4"; gene_id "AT1G01490";
1	Araport11	CDS	181594	181680	.	-	0	transcript_id "AT1G01490.4"; gene_id "AT1G01490";
1	StringTie	transcript	180035	182252	1000	-	.	transcript_id "STRG.43.4"; gene_id "STRG.43"; locus "RLOC_00000060";
1	StringTie	exon	180035	181422	1000	-	.	transcript_id "STRG.43.4"; gene_id "STRG.43";
1	StringTie	exon	182061	182252	1000	-	.	transcript_id "STRG.43.4"; gene_id "STRG.43";
1	StringTie	transcript	180035	182478	1000	-	.	transcript_id "STRG.43.3"; gene_id "STRG.43"; locus "RLOC_00000060";
1	StringTie	exon	180035	180852	1000	-	.	transcript_id "STRG.43.3"; gene_id "STRG.43";
1	StringTie	exon	181347	182478	1000	-	.	transcript_id "STRG.43.3"; gene_id "STRG.43";
1	Araport11	transcript	180056	182749	.	-	.	transcript_id "AT1G01490.1"; gene_id "AT1G01490"; locus "RLOC_00000060";
1	Araport11	exon	180056	180852	.	-	.	transcript_id "AT1G01490.1"; gene_id "AT1G01490";
1	Araport11	exon	181347	181422	.	-	.	transcript_id "AT1G01490.1"; gene_id "AT1G01490";
1	Araport11	exon	182061	182749	.	-	.	transcript_id "AT1G01490.1"; gene_id "AT1G01490";
1	Araport11	CDS	180401	180852	.	-	2	transcript_id "AT1G01490.1"; gene_id "AT1G01490";
1	Araport11	CDS	181347	181422	.	-	0	transcript_id "AT1G01490.1"; gene_id "AT1G01490";
1	Araport11	CDS	182061	182066	.	-	0	transcript_id "AT1G01490.1"; gene_id "AT1G01490";
1	Araport11	transcript	180056	182749	.	-	.	transcript_id "AT1G01490.2"; gene_id "AT1G01490"; locus "RLOC_00000060";
1	Araport11	exon	180056	180852	.	-	.	transcript_id "AT1G01490.2"; gene_id "AT1G01490";
1	Araport11	exon	181347	181422	.	-	.	transcript_id "AT1G01490.2"; gene_id "AT1G01490";
1	Araport11	exon	182061	182135	.	-	.	transcript_id "AT1G01490.2"; gene_id "AT1G01490";
1	Araport11	exon	182253	182749	.	-	.	transcript_id "AT1G01490.2"; gene_id "AT1G01490";
1	Araport11	CDS	180401	180852	.	-	2	transcript_id "AT1G01490.2"; gene_id "AT1G01490";
1	Araport11	CDS	181347	181422	.	-	0	transcript_id "AT1G01490.2"; gene_id "AT1G01490";
1	Araport11	CDS	182061	182066	.	-	0	transcript_id "AT1G01490.2"; gene_id "AT1G01490";
1	Araport11	transcript	185033	187135	.	+	.	transcript_id "AT1G01500.1"; gene_id "AT1G01500"; locus "RLOC_00000061";
1	Araport11	exon	185033	186009	.	+	.	transcript_id "AT1G01500.1"; gene_id "AT1G01500";
1	Araport11	exon	186340	187135	.	+	.	transcript_id "AT1G01500.1"; gene_id "AT1G01500";
1	Araport11	CDS	185260	186009	.	+	0	transcript_id "AT1G01500.1"; gene_id "AT1G01500";
1	Araport11	CDS	186340	186573	.	+	0	transcript_id "AT1G01500.1"; gene_id "AT1G01500";
1	StringTie	transcript	187162	193138	1000	+	.	transcript_id "STRG.45.1"; gene_id "STRG.45"; locus "RLOC_00000062";
1	StringTie	exon	187162	187822	1000	+	.	transcript_id "STRG.45.1"; gene_id "STRG.45";
1	StringTie	exon	188011	188176	1000	+	.	transcript_id "STRG.45.1"; gene_id "STRG.45";
1	StringTie	exon	188284	188414	1000	+	.	transcript_id "STRG.45.1"; gene_id "STRG.45";
1	StringTie	exon	188529	189320	1000	+	.	transcript_id "STRG.45.1"; gene_id "STRG.45";
1	StringTie	exon	189417	189464	1000	+	.	transcript_id "STRG.45.1"; gene_id "STRG.45";
1	StringTie	exon	189562	189675	1000	+	.	transcript_id "STRG.45.1"; gene_id "STRG.45";
1	StringTie	exon	189765	190828	1000	+	.	transcript_id "STRG.45.1"; gene_id "STRG.45";
1	StringTie	exon	190941	190998	1000	+	.	transcript_id "STRG.45.1"; gene_id "STRG.45";
1	StringTie	exon	191138	191258	1000	+	.	transcript_id "STRG.45.1"; gene_id "STRG.45";
1	StringTie	exon	191341	191475	1000	+	.	transcript_id "STRG.45.1"; gene_id "STRG.45";
1	StringTie	exon	191579	191692	1000	+	.	transcript_id "STRG.45.1"; gene_id "STRG.45";
1	StringTie	exon	191780	191889	1000	+	.	transcript_id "STRG.45.1"; gene_id "STRG.45";
1	StringTie	exon	191967	192026	1000	+	.	transcript_id "STRG.45.1"; gene_id "STRG.45";
1	StringTie	exon	192107	193138	1000	+	.	transcript_id "STRG.45.1"; gene_id "STRG.45";
1	StringTie	CDS	187235	187822	.	+	0	transcript_id "STRG.45.1"; gene_id "STRG.45";
1	StringTie	CDS	188011	188176	.	+	0	transcript_id "STRG.45.1"; gene_id "STRG.45";
1	StringTie	CDS	188284	188414	.	+	2	transcript_id "STRG.45.1"; gene_id "STRG.45";
1	StringTie	CDS	188529	189320	.	+	0	transcript_id "STRG.45.1"; gene_id "STRG.45";
1	StringTie	CDS	189417	189464	.	+	0	transcript_id "STRG.45.1"; gene_id "STRG.45";
1	StringTie	CDS	189562	189675	.	+	0	transcript_id "STRG.45.1"; gene_id "STRG.45";
1	StringTie	CDS	189765	189836	.	+	0	transcript_id "STRG.45.1"; gene_id "STRG.45";
1	StringTie	transcript	187162	193138	1000	+	.	transcript_id "STRG.45.2"; gene_id "STRG.45"; locus "RLOC_00000062";
1	StringTie	exon	187162	187822	1000	+	.	transcript_id "STRG.45.2"; gene_id "STRG.45";
1	StringTie	exon	188011	188176	1000	+	.	transcript_id "STRG.45.2"; gene_id "STRG.45";
1	StringTie	exon	188284	188414	1000	+	.	transcript_id "STRG.45.2"; gene_id "STRG.45";
1	StringTie	exon	188529	189320	1000	+	.	transcript_id "STRG.45.2"; gene_id "STRG.45";
1	StringTie	exon	189417	189464	1000	+	.	transcript_id "STRG.45.2"; gene_id "STRG.45";
1	StringTie	exon	189562	189675	1000	+	.	transcript_id "STRG.45.2"; gene_id "STRG.45";
1	StringTie	exon	189765	190828	1000	+	.	transcript_id "STRG.45.2"; gene_id "STRG.45";
1	StringTie	exon	190941	190998	1000	+	.	transcript_id "STRG.45.2"; gene_id "STRG.45";
1	StringTie	exon	191138	191258	1000	+	.	transcript_id "STRG.45.2"; gene_id "STRG.45";
1	StringTie	exon	191341	191475	1000	+	.	transcript_id "STRG.45.2"; gene_id "STRG.45";
1	StringTie	exon	191579	191692	1000	+	.	transcript_id "STRG.45.2"; gene_id "STRG.45";
1	StringTie	exon	191780	191889	1000	+	.	transcript_id "STRG.45.2"; gene_id "STRG.45";
1	StringTie	exon	191967	193138	1000	+	.	transcript_id "STRG.45.2"; gene_id "STRG.45";
1	StringTie	CDS	190596	190828	.	+	0	transcript_id "STRG.45.2"; gene_id "STRG.45";
1	StringTie	CDS	190941	190998	.	+	1	transcript_id "STRG.45.2"; gene_id "STRG.45";
1	StringTie	CDS	191138	191258	.	+	0	transcript_id "STRG.45.2"; gene_id "STRG.45";
1	StringTie	CDS	191341	191475	.	+	2	transcript_id "STRG.45.2"; gene_id "STRG.45";
1	StringTie	CDS	191579	191692	.	+	2	transcript_id "STRG.45.2"; gene_id "STRG.45";
1	StringTie	CDS	191780	191889	.	+	2	transcript_id "STRG.45.2"; gene_id "STRG.45";
1	StringTie	CDS	191967	192059	.	+	0	transcript_id "STRG.45.2"; gene_id "STRG.45";
1	StringTie	transcript	187162	193138	1000	+	.	transcript_id "STRG.45.3"; gene_id "STRG.45"; locus "RLOC_00000062";
1	StringTie	exon	187162	187822	1000	+	.	transcript_id "STRG.45.3"; gene_id "STRG.45";
1	StringTie	exon	188011	188176	1000	+	.	transcript_id "STRG.45.3"; gene_id "STRG.45";
1	StringTie	exon	188284	188414	1000	+	.	transcript_id "STRG.45.3"; gene_id "STRG.45";
1	StringTie	exon	188529	189320	1000	+	.	transcript_id "STRG.45.3"; gene_id "STRG.45";
1	StringTie	exon	189417	189464	1000	+	.	transcript_id "STRG.45.3"; gene_id "STRG.45";
1	StringTie	exon	189562	189675	1000	+	.	transcript_id "STRG.45.3"; gene_id "STRG.45";
1	StringTie	exon	189765	190828	1000	+	.	transcript_id "STRG.45.3"; gene_id "STRG.45";
1	StringTie	exon	190941	190998	1000	+	.	transcript_id "STRG.45.3"; gene_id "STRG.45";
1	StringTie	exon	191138	191258	1000	+	.	transcript_id "STRG.45.3"; gene_id "STRG.45";
1	StringTie	exon	191341	191475	1000	+	.	transcript_id "STRG.45.3"; gene_id "STRG.45";
1	StringTie	exon	191579	191692	1000	+	.	transcript_id "STRG.45.3"; gene_id "STRG.45";
1	StringTie	exon	191780	192026	1000	+	.	transcript_id "STRG.45.3"; gene_id "STRG.45";
1	StringTie	exon	192107	193138	1000	+	.	transcript_id "STRG.45.3"; gene_id "STRG.45";
1	StringTie	CDS	190596	190828	.	+	0	transcript_id "STRG.45.3"; gene_id "STRG.45";
1	StringTie	CDS	190941	190998	.	+	1	transcript_id "STRG.45.3"; gene_id "STRG.45";
1	StringTie	CDS	191138	191258	.	+	0	transcript_id "STRG.45.3"; gene_id "STRG.45";
1	StringTie	CDS	191341	191475	.	+	2	transcript_id "STRG.45.3"; gene_id "STRG.45";
1	StringTie	CDS	191579	191692	.	+	2	transcript_id "STRG.45.3"; gene_id "STRG.45";
1	StringTie	CDS	191780	191895	.	+	2	transcript_id "STRG.45.3"; gene_id "STRG.45";
1	StringTie	transcript	187162	193138	1000	+	.	transcript_id "STRG.45.4"; gene_id "STRG.45"; locus "RLOC_00000062";
1	StringTie	exon	187162	187822	1000	+	.	transcript_id "STRG.45.4"; gene_id "STRG.45";
1	StringTie	exon	188011	188176	1000	+	.	transcript_id "STRG.45.4"; gene_id "STRG.45";
1	StringTie	exon	188284	188414	1000	+	.	transcript_id "STRG.45.4"; gene_id "STRG.45";
1	StringTie	exon	188529	189320	1000	+	.	transcript_id "STRG.45.4"; gene_id "STRG.45";
1	StringTie	exon	189417	189464	1000	+	.	transcript_id "STRG.45.4"; gene_id "STRG.45";
1	StringTie	exon	189562	189675	1000	+	.	transcript_id "STRG.45.4"; gene_id "STRG.45";
1	StringTie	exon	189765	190828	1000	+	.	transcript_id "STRG.45.4"; gene_id "STRG.45";
1	StringTie	exon	190941	190998	1000	+	.	transcript_id "STRG.45.4"; gene_id "STRG.45";
1	StringTie	exon	191138	191475	1000	+	.	transcript_id "STRG.45.4"; gene_id "STRG.45";
1	StringTie	exon	191579	191692	1000	+	.	transcript_id "STRG.45.4"; gene_id "STRG.45";
1	StringTie	exon	191780	191889	1000	+	.	transcript_id "STRG.45.4"; gene_id "STRG.45";
1	StringTie	exon	191967	192026	1000	+	.	transcript_id "STRG.45.4"; gene_id "STRG.45";
1	StringTie	exon	192107	193138	1000	+	.	transcript_id "STRG.45.4"; gene_id "STRG.45";
1	StringTie	CDS	191181	191475	.	+	0	transcript_id "STRG.45.4"; gene_id "STRG.45";
1	StringTie	CDS	191579	191692	.	+	2	transcript_id "STRG.45.4"; gene_id "STRG.45";
1	StringTie	CDS	191780	191889	.	+	2	transcript_id "STRG.45.4"; gene_id "STRG.45";
1	StringTie	CDS	191967	192026	.	+	0	transcript_id "STRG.45.4"; gene_id "STRG.45";
1	StringTie	CDS	192107	192139	.	+	0	transcript_id "STRG.45.4"; gene_id "STRG.45";
1	StringTie	transcript	187162	193138	1000	+	.	transcript_id "STRG.45.5"; gene_id "STRG.45"; locus "RLOC_00000062";
1	StringTie	exon	187162	187822	1000	+	.	transcript_id "STRG.45.5"; gene_id "STRG.45";
1	StringTie	exon	188011	188176	1000	+	.	transcript_id "STRG.45.5"; gene_id "STRG.45";
1	StringTie	exon	188284	188414	1000	+	.	transcript_id "STRG.45.5"; gene_id "STRG.45";
1	StringTie	exon	188529	189320	1000	+	.	transcript_id "STRG.45.5"; gene_id "STRG.45";
1	StringTie	exon	189417	189464	1000	+	.	transcript_id "STRG.45.5"; gene_id "STRG.45";
1	StringTie	exon	189562	189675	1000	+	.	transcript_id "STRG.45.5"; gene_id "STRG.45";
1	StringTie	exon	189765	190828	1000	+	.	transcript_id "STRG.45.5"; gene_id "STRG.45";
1	StringTie	exon	190941	190998	1000	+	.	transcript_id "STRG.45.5"; gene_id "STRG.45";
1	StringTie	exon	191138	191475	1000	+	.	transcript_id "STRG.45.5"; gene_id "STRG.45";
1	StringTie	exon	191579	191692	1000	+	.	transcript_id "STRG.45.5"; gene_id "STRG.45";
1	StringTie	exon	191780	193138	1000	+	.	transcript_id "STRG.45.5"; gene_id "STRG.45";
1	StringTie	transcript	187162	193138	1000	+	.	transcript_id "STRG.45.6"; gene_id "STRG.45"; locus "RLOC_00000062";
1	StringTie	exon	187162	187822	1000	+	.	transcript_id "STRG.45.6"; gene_id "STRG.45";
1	StringTie	exon	188011	188176	1000	+	.	transcript_id "STRG.45.6"; gene_id "STRG.45";
1	StringTie	exon	188284	188414	1000	+	.	transcript_id "STRG.45.6"; gene_id "STRG.45";
1	StringTie	exon	188529	189320	1000	+	.	transcript_id "STRG.45.6"; gene_id "STRG.45";
1	StringTie	exon	189417	189464	1000	+	.	transcript_id "STRG.45.6"; gene_id "STRG.45";
1	StringTie	exon	189562	189675	1000	+	.	transcript_id "STRG.45.6"; gene_id "STRG.45";
1	StringTie	exon	189765	190828	1000	+	.	transcript_id "STRG.45.6"; gene_id "STRG.45";
1	StringTie	exon	190941	190998	1000	+	.	transcript_id "STRG.45.6"; gene_id "STRG.45";
1	StringTie	exon	191138	191258	1000	+	.	transcript_id "STRG.45.6"; gene_id "STRG.45";
1	StringTie	exon	191341	191475	1000	+	.	transcript_id "STRG.45.6"; gene_id "STRG.45";
1	StringTie	exon	191579	191889	1000	+	.	transcript_id "STRG.45.6"; gene_id "STRG.45";
1	StringTie	exon	191967	193138	1000	+	.	transcript_id "STRG.45.6"; gene_id "STRG.45";
1	Araport11	transcript	190408	192436	.	+	.	transcript_id "AT1G01520.2"; gene_id "AT1G01520"; locus "RLOC_00000062";
1	Araport11	exon	190408	190828	.	+	.	transcript_id "AT1G01520.2"; gene_id "AT1G01520";
1	Araport11	exon	190941	190998	.	+	.	transcript_id "AT1G01520.2"; gene_id "AT1G01520";
1	Araport11	exon	191138	191258	.	+	.	transcript_id "AT1G01520.2"; gene_id "AT1G01520";
1	Araport11	exon	191341	191475	.	+	.	transcript_id "AT1G01520.2"; gene_id "AT1G01520";
1	Araport11	exon	191579	191692	.	+	.	transcript_id "AT1G01520.2"; gene_id "AT1G01520";
1	Araport11	exon	191780	192436	.	+	.	transcript_id "AT1G01520.2"; gene_id "AT1G01520";
1	Araport11	CDS	190596	190828	.	+	0	transcript_id "AT1G01520.2"; gene_id "AT1G01520";
1	Araport11	CDS	190941	190998	.	+	1	transcript_id "AT1G01520.2"; gene_id "AT1G01520";
1	Araport11	CDS	191138	191258	.	+	0	transcript_id "AT1G01520.2"; gene_id "AT1G01520";
1	Araport11	CDS	191341	191475	.	+	2	transcript_id "AT1G01520.2"; gene_id "AT1G01520";
1	Araport11	CDS	191579	191692	.	+	2	transcript_id "AT1G01520.2"; gene_id "AT1G01520";
1	Araport11	CDS	191780	191895	.	+	2	transcript_id "AT1G01520.2"; gene_id "AT1G01520";
1	Araport11	transcript	192634	193670	.	-	.	transcript_id "AT1G01530.1"; gene_id "AT1G01530"; locus "RLOC_00000063";
1	Araport11	exon	192634	193071	.	-	.	transcript_id "AT1G01530.1"; gene_id "AT1G01530";
1	Araport11	exon	193351	193670	.	-	.	transcript_id "AT1G01530.1"; gene_id "AT1G01530";
1	Araport11	CDS	192640	193071	.	-	0	transcript_id "AT1G01530.1"; gene_id "AT1G01530";
1	Araport11	CDS	193351	193662	.	-	0	transcript_id "AT1G01530.1"; gene_id "AT1G01530";
1	Araport11	transcript	195645	198787	.	+	.	transcript_id "AT1G01540.2"; gene_id "AT1G01540"; locus "RLOC_00000064";
1	Araport11	exon	195645	196542	.	+	.	transcript_id "AT1G01540.2"; gene_id "AT1G01540";
1	Araport11	exon	197115	197219	.	+	.	transcript_id "AT1G01540.2"; gene_id "AT1G01540";
1	Araport11	exon	197300	197422	.	+	.	transcript_id "AT1G01540.2"; gene_id "AT1G01540";
1	Araport11	exon	197501	197671	.	+	.	transcript_id "AT1G01540.2"; gene_id "AT1G01540";
1	Araport11	exon	197775	197904	.	+	.	transcript_id "AT1G01540.2"; gene_id "AT1G01540";
1	Araport11	exon	197974	198183	.	+	.	transcript_id "AT1G01540.2"; gene_id "AT1G01540";
1	Araport11	exon	198267	198787	.	+	.	transcript_id "AT1G01540.2"; gene_id "AT1G01540";
1	Araport11	CDS	195980	196542	.	+	0	transcript_id "AT1G01540.2"; gene_id "AT1G01540";
1	Araport11	CDS	197115	197219	.	+	1	transcript_id "AT1G01540.2"; gene_id "AT1G01540";
1	Araport11	CDS	197300	197422	.	+	1	transcript_id "AT1G01540.2"; gene_id "AT1G01540";
1	Araport11	CDS	197501	197671	.	+	1	transcript_id "AT1G01540.2"; gene_id "AT1G01540";
1	Araport11	CDS	197775	197904	.	+	1	transcript_id "AT1G01540.2"; gene_id "AT1G01540";
1	Araport11	CDS	197974	198183	.	+	0	transcript_id "AT1G01540.2"; gene_id "AT1G01540";
1	Araport11	CDS	198267	198383	.	+	0	transcript_id "AT1G01540.2"; gene_id "AT1G01540";
1	StringTie	transcript	195657	198756	1000	+	.	transcript_id "STRG.46.2"; gene_id "STRG.46"; locus "RLOC_00000064";
1	StringTie	exon	195657	196542	1000	+	.	transcript_id "STRG.46.2"; gene_id "STRG.46";
1	StringTie	exon	197115	197219	1000	+	.	transcript_id "STRG.46.2"; gene_id "STRG.46";
1	StringTie	exon	197300	197422	1000	+	.	transcript_id "STRG.46.2"; gene_id "STRG.46";
1	StringTie	exon	197501	197671	1000	+	.	transcript_id "STRG.46.2"; gene_id "STRG.46";
1	StringTie	exon	197775	198183	1000	+	.	transcript_id "STRG.46.2"; gene_id "STRG.46";
1	StringTie	exon	198267	198756	1000	+	.	transcript_id "STRG.46.2"; gene_id "STRG.46";
1	StringTie	CDS	195980	196542	.	+	0	transcript_id "STRG.46.2"; gene_id "STRG.46";
1	StringTie	CDS	197115	197219	.	+	1	transcript_id "STRG.46.2"; gene_id "STRG.46";
1	StringTie	CDS	197300	197422	.	+	1	transcript_id "STRG.46.2"; gene_id "STRG.46";
1	StringTie	CDS	197501	197671	.	+	1	transcript_id "STRG.46.2"; gene_id "STRG.46";
1	StringTie	CDS	197775	197973	.	+	1	transcript_id "STRG.46.2"; gene_id "STRG.46";
1	Araport11	transcript	199527	201775	.	+	.	transcript_id "AT1G01550.1"; gene_id "AT1G01550"; locus "RLOC_00000065";
1	Araport11	exon	199527	199763	.	+	.	transcript_id "AT1G01550.1"; gene_id "AT1G01550";
1	Araport11	exon	199890	199959	.	+	.	transcript_id "AT1G01550.1"; gene_id "AT1G01550";
1	Araport11	exon	200511	201775	.	+	.	transcript_id "AT1G01550.1"; gene_id "AT1G01550";
1	Araport11	CDS	200526	201575	.	+	0	transcript_id "AT1G01550.1"; gene_id "AT1G01550";
1	StringTie	transcript	199611	201781	1000	+	.	transcript_id "STRG.49.2"; gene_id "STRG.49"; locus "RLOC_00000065";
1	StringTie	exon	199611	199763	1000	+	.	transcript_id "STRG.49.2"; gene_id "STRG.49";
1	StringTie	exon	199890	201781	1000	+	.	transcript_id "STRG.49.2"; gene_id "STRG.49";
1	Araport11	transcript	199630	201775	.	+	.	transcript_id "AT1G01550.2"; gene_id "AT1G01550"; locus "RLOC_00000065";
1	Araport11	exon	199630	199959	.	+	.	transcript_id "AT1G01550.2"; gene_id "AT1G01550";
1	Araport11	exon	200511	201775	.	+	.	transcript_id "AT1G01550.2"; gene_id "AT1G01550";
1	Araport11	CDS	200526	201575	.	+	0	transcript_id "AT1G01550.2"; gene_id "AT1G01550";
1	Araport11	transcript	202103	204388	.	+	.	transcript_id "AT1G01560.3"; gene_id "AT1G01560"; locus "RLOC_00000066";
1	Araport11	exon	202103	202508	.	+	.	transcript_id "AT1G01560.3"; gene_id "AT1G01560";
1	Araport11	exon	202782	202911	.	+	.	transcript_id "AT1G01560.3"; gene_id "AT1G01560";
1	Araport11	exon	202991	203128	.	+	.	transcript_id "AT1G01560.3"; gene_id "AT1G01560";
1	Araport11	exon	203267	203599	.	+	.	transcript_id "AT1G01560.3"; gene_id "AT1G01560";
1	Araport11	exon	203760	204388	.	+	.	transcript_id "AT1G01560.3"; gene_id "AT1G01560";
1	Araport11	CDS	202345	202508	.	+	0	transcript_id "AT1G01560.3"; gene_id "AT1G01560";
1	Araport11	CDS	202782	202911	.	+	1	transcript_id "AT1G01560.3"; gene_id "AT1G01560";
1	Araport11	CDS	202991	203128	.	+	0	transcript_id "AT1G01560.3"; gene_id "AT1G01560";
1	Araport11	CDS	203267	203599	.	+	0	transcript_id "AT1G01560.3"; gene_id "AT1G01560";
1	Araport11	CDS	203760	204035	.	+	0	transcript_id "AT1G01560.3"; gene_id "AT1G01560";
1	Araport11	transcript	202111	204440	.	+	.	transcript_id "AT1G01560.2"; gene_id "AT1G01560"; locus "RLOC_00000066";
1	Araport11	exon	202111	202508	.	+	.	transcript_id "AT1G01560.2"; gene_id "AT1G01560";
1	Araport11	exon	202782	202911	.	+	.	transcript_id "AT1G01560.2"; gene_id "AT1G01560";
1	Araport11	exon	202991	203128	.	+	.	transcript_id "AT1G01560.2"; gene_id "AT1G01560";
1	Araport11	exon	203267	203599	.	+	.	transcript_id "AT1G01560.2"; gene_id "AT1G01560";
1	Araport11	exon	203760	203943	.	+	.	transcript_id "AT1G01560.2"; gene_id "AT1G01560";
1	Araport11	exon	204029	204440	.	+	.	transcript_id "AT1G01560.2"; gene_id "AT1G01560";
1	Araport11	CDS	202345	202508	.	+	0	transcript_id "AT1G01560.2"; gene_id "AT1G01560";
1	Araport11	CDS	202782	202911	.	+	1	transcript_id "AT1G01560.2"; gene_id "AT1G01560";
1	Araport11	CDS	202991	203128	.	+	0	transcript_id "AT1G01560.2"; gene_id "AT1G01560";
1	Araport11	CDS	203267	203599	.	+	0	transcript_id "AT1G01560.2"; gene_id "AT1G01560";
1	Araport11	CDS	203760	203943	.	+	0	transcript_id "AT1G01560.2"; gene_id "AT1G01560";
1	Araport11	CDS	204029	204189	.	+	2	transcript_id "AT1G01560.2"; gene_id "AT1G01560";
1	Araport11	transcript	202136	204335	.	+	.	transcript_id "AT1G01560.1"; gene_id "AT1G01560"; locus "RLOC_00000066";
1	Araport11	exon	202136	202508	.	+	.	transcript_id "AT1G01560.1"; gene_id "AT1G01560";
1	Araport11	exon	202782	202911	.	+	.	transcript_id "AT1G01560.1"; gene_id "AT1G01560";
1	Araport11	exon	202991	203128	.	+	.	transcript_id "AT1G01560.1"; gene_id "AT1G01560";
1	Araport11	exon	203267	204335	.	+	.	transcript_id "AT1G01560.1"; gene_id "AT1G01560";
1	Araport11	CDS	202345	202508	.	+	0	transcript_id "AT1G01560.1"; gene_id "AT1G01560";
1	Araport11	CDS	202782	202911	.	+	1	transcript_id "AT1G01560.1"; gene_id "AT1G01560";
1	Araport11	CDS	202991	203128	.	+	0	transcript_id "AT1G01560.1"; gene_id "AT1G01560";
1	Araport11	CDS	203267	203662	.	+	0	transcript_id "AT1G01560.1"; gene_id "AT1G01560";
1	Araport11	transcript	202136	204335	.	+	.	transcript_id "AT1G01560.4"; gene_id "AT1G01560"; locus "RLOC_00000066";
1	Araport11	exon	202136	202508	.	+	.	transcript_id "AT1G01560.4"; gene_id "AT1G01560";
1	Araport11	exon	202782	202911	.	+	.	transcript_id "AT1G01560.4"; gene_id "AT1G01560";
1	Araport11	exon	202991	203128	.	+	.	transcript_id "AT1G01560.4"; gene_id "AT1G01560";
1	Araport11	exon	203267	203943	.	+	.	transcript_id "AT1G01560.4"; gene_id "AT1G01560";
1	Araport11	exon	204029	204335	.	+	.	transcript_id "AT1G01560.4"; gene_id "AT1G01560";
1	Araport11	CDS	202345	202508	.	+	0	transcript_id "AT1G01560.4"; gene_id "AT1G01560";
1	Araport11	CDS	202782	202911	.	+	1	transcript_id "AT1G01560.4"; gene_id "AT1G01560";
1	Araport11	CDS	202991	203128	.	+	0	transcript_id "AT1G01560.4"; gene_id "AT1G01560";
1	Araport11	CDS	203267	203662	.	+	0	transcript_id "AT1G01560.4"; gene_id "AT1G01560";
1	Araport11	transcript	204935	207642	.	+	.	transcript_id "AT1G01570.2"; gene_id "AT1G01570"; locus "RLOC_00000067";
1	Araport11	exon	204935	205949	.	+	.	transcript_id "AT1G01570.2"; gene_id "AT1G01570";
1	Araport11	exon	206692	207243	.	+	.	transcript_id "AT1G01570.2"; gene_id "AT1G01570";
1	Araport11	exon	207325	207642	.	+	.	transcript_id "AT1G01570.2"; gene_id "AT1G01570";
1	Araport11	CDS	205083	205949	.	+	0	transcript_id "AT1G01570.2"; gene_id "AT1G01570";
1	Araport11	CDS	206692	207243	.	+	0	transcript_id "AT1G01570.2"; gene_id "AT1G01570";
1	Araport11	CDS	207325	207435	.	+	0	transcript_id "AT1G01570.2"; gene_id "AT1G01570";
1	Araport11	transcript	208995	213082	.	+	.	transcript_id "AT1G01580.2"; gene_id "AT1G01580"; locus "RLOC_00000068";
1	Araport11	exon	208995	209608	.	+	.	transcript_id "AT1G01580.2"; gene_id "AT1G01580";
1	Araport11	exon	209764	209866	.	+	.	transcript_id "AT1G01580.2"; gene_id "AT1G01580";
1	Araport11	exon	209950	210144	.	+	.	transcript_id "AT1G01580.2"; gene_id "AT1G01580";
1	Araport11	exon	210385	210619	.	+	.	transcript_id "AT1G01580.2"; gene_id "AT1G01580";
1	Araport11	exon	211052	211379	.	+	.	transcript_id "AT1G01580.2"; gene_id "AT1G01580";
1	Araport11	exon	211474	211717	.	+	.	transcript_id "AT1G01580.2"; gene_id "AT1G01580";
1	Araport11	exon	211855	212573	.	+	.	transcript_id "AT1G01580.2"; gene_id "AT1G01580";
1	Araport11	exon	212671	213082	.	+	.	transcript_id "AT1G01580.2"; gene_id "AT1G01580";
1	Araport11	CDS	209161	209608	.	+	0	transcript_id "AT1G01580.2"; gene_id "AT1G01580";
1	Araport11	CDS	209764	209866	.	+	2	transcript_id "AT1G01580.2"; gene_id "AT1G01580";
1	Araport11	CDS	209950	210144	.	+	1	transcript_id "AT1G01580.2"; gene_id "AT1G01580";
1	Araport11	CDS	210385	210619	.	+	1	transcript_id "AT1G01580.2"; gene_id "AT1G01580";
1	Araport11	CDS	211052	211379	.	+	0	transcript_id "AT1G01580.2"; gene_id "AT1G01580";
1	Araport11	CDS	211474	211717	.	+	2	transcript_id "AT1G01580.2"; gene_id "AT1G01580";
1	Araport11	CDS	211855	212573	.	+	1	transcript_id "AT1G01580.2"; gene_id "AT1G01580";
1	Araport11	CDS	212671	212810	.	+	2	transcript_id "AT1G01580.2"; gene_id "AT1G01580";
1	Araport11	transcript	214150	217734	.	+	.	transcript_id "AT1G01590.1"; gene_id "AT1G01590"; locus "RLOC_00000069";
1	Araport11	exon	214150	214406	.	+	.	transcript_id "AT1G01590.1"; gene_id "AT1G01590";
1	Araport11	exon	214480	214582	.	+	.	transcript_id "AT1G01590.1"; gene_id "AT1G01590";
1	Araport11	exon	214697	214897	.	+	.	transcript_id "AT1G01590.1"; gene_id "AT1G01590";
1	Araport11	exon	215317	215554	.	+	.	transcript_id "AT1G01590.1"; gene_id "AT1G01590";
1	Araport11	exon	215633	215960	.	+	.	transcript_id "AT1G01590.1"; gene_id "AT1G01590";
1	Araport11	exon	216044	216293	.	+	.	transcript_id "AT1G01590.1"; gene_id "AT1G01590";
1	Araport11	exon	216414	217090	.	+	.	transcript_id "AT1G01590.1"; gene_id "AT1G01590";
1	Araport11	exon	217165	217734	.	+	.	transcript_id "AT1G01590.1"; gene_id "AT1G01590";
1	Araport11	CDS	214229	214406	.	+	0	transcript_id "AT1G01590.1"; gene_id "AT1G01590";
1	Araport11	CDS	214480	214582	.	+	2	transcript_id "AT1G01590.1"; gene_id "AT1G01590";
1	Araport11	CDS	214697	214897	.	+	1	transcript_id "AT1G01590.1"; gene_id "AT1G01590";
1	Araport11	CDS	215317	215554	.	+	1	transcript_id "AT1G01590.1"; gene_id "AT1G01590";
1	Araport11	CDS	215633	215960	.	+	0	transcript_id "AT1G01590.1"; gene_id "AT1G01590";
1	Araport11	CDS	216044	216293	.	+	2	transcript_id "AT1G01590.1"; gene_id "AT1G01590";
1	Araport11	CDS	216414	217090	.	+	1	transcript_id "AT1G01590.1"; gene_id "AT1G01590";
1	Araport11	CDS	217165	217304	.	+	2	transcript_id "AT1G01590.1"; gene_id "AT1G01590";
1	Araport11	transcript	218834	221286	.	+	.	transcript_id "AT1G01600.1"; gene_id "AT1G01600"; locus "RLOC_00000070";
1	Araport11	exon	218834	219621	.	+	.	transcript_id "AT1G01600.1"; gene_id "AT1G01600";
1	Araport11	exon	219752	221286	.	+	.	transcript_id "AT1G01600.1"; gene_id "AT1G01600";
1	Araport11	CDS	219200	219621	.	+	0	transcript_id "AT1G01600.1"; gene_id "AT1G01600";
1	Araport11	CDS	219752	220994	.	+	1	transcript_id "AT1G01600.1"; gene_id "AT1G01600";
1	Araport11	transcript	221642	224351	.	-	.	transcript_id "AT1G01610.1"; gene_id "AT1G01610"; locus "RLOC_00000071";
1	Araport11	exon	221642	222359	.	-	.	transcript_id "AT1G01610.1"; gene_id "AT1G01610";
1	Araport11	exon	222622	223096	.	-	.	transcript_id "AT1G01610.1"; gene_id "AT1G01610";
1	Araport11	exon	223551	223866	.	-	.	transcript_id "AT1G01610.1"; gene_id "AT1G01610";
1	Araport11	exon	223945	224351	.	-	.	transcript_id "AT1G01610.1"; gene_id "AT1G01610";
1	Araport11	CDS	221950	222359	.	-	2	transcript_id "AT1G01610.1"; gene_id "AT1G01610";
1	Araport11	CDS	222622	223096	.	-	0	transcript_id "AT1G01610.1"; gene_id "AT1G01610";
1	Araport11	CDS	223551	223866	.	-	1	transcript_id "AT1G01610.1"; gene_id "AT1G01610";
1	Araport11	CDS	223945	224255	.	-	0	transcript_id "AT1G01610.1"; gene_id "AT1G01610";
1	StringTie	transcript	225616	227528	1000	-	.	transcript_id "STRG.53.1"; gene_id "STRG.53"; locus "RLOC_00000072";
1	StringTie	exon	225616	226081	1000	-	.	transcript_id "STRG.53.1"; gene_id "STRG.53";
1	StringTie	exon	226171	226311	1000	-	.	transcript_id "STRG.53.1"; gene_id "STRG.53";
1	StringTie	exon	226396	226691	1000	-	.	transcript_id "STRG.53.1"; gene_id "STRG.53";
1	StringTie	exon	226849	227528	1000	-	.	transcript_id "STRG.53.1"; gene_id "STRG.53";
1	StringTie	CDS	225986	226081	.	-	0	transcript_id "STRG.53.1"; gene_id "STRG.53";
1	StringTie	CDS	226171	226311	.	-	0	transcript_id "STRG.53.1"; gene_id "STRG.53";
1	StringTie	CDS	226396	226691	.	-	2	transcript_id "STRG.53.1"; gene_id "STRG.53";
1	StringTie	CDS	226849	227176	.	-	0	transcript_id "STRG.53.1"; gene_id "STRG.53";
1	Araport11	transcript	225665	227302	.	-	.	transcript_id "AT1G01620.2"; gene_id "AT1G01620"; locus "RLOC_00000072";
1	Araport11	exon	225665	226081	.	-	.	transcript_id "AT1G01620.2"; gene_id "AT1G01620";
1	Araport11	exon	226171	226311	.	-	.	transcript_id "AT1G01620.2"; gene_id "AT1G01620";
1	Araport11	exon	226396	226691	.	-	.	transcript_id "AT1G01620.2"; gene_id "AT1G01620";
1	Araport11	exon	226849	227049	.	-	.	transcript_id "AT1G01620.2"; gene_id "AT1G01620";
1	Araport11	exon	227079	227302	.	-	.	transcript_id "AT1G01620.2"; gene_id "AT1G01620";
1	Araport11	CDS	225986	226081	.	-	0	transcript_id "AT1G01620.2"; gene_id "AT1G01620";
1	Araport11	CDS	226171	226311	.	-	0	transcript_id "AT1G01620.2"; gene_id "AT1G01620";
1	Araport11	CDS	226396	226691	.	-	2	transcript_id "AT1G01620.2"; gene_id "AT1G01620";
1	Araport11	CDS	226849	226960	.	-	0	transcript_id "AT1G01620.2"; gene_id "AT1G01620";
1	Araport11	transcript	228799	230979	.	+	.	transcript_id "AT1G01630.1"; gene_id "AT1G01630"; locus "RLOC_00000073";
1	Araport11	exon	228799	229343	.	+	.	transcript_id "AT1G01630.1"; gene_id "AT1G01630";
1	Araport11	exon	229429	229724	.	+	.	transcript_id "AT1G01630.1"; gene_id "AT1G01630";
1	Araport11	exon	229829	229934	.	+	.	transcript_id "AT1G01630.1"; gene_id "AT1G01630";
1	Araport11	exon	230349	230459	.	+	.	transcript_id "AT1G01630.1"; gene_id "AT1G01630";
1	Araport11	exon	230559	230979	.	+	.	transcript_id "AT1G01630.1"; gene_id "AT1G01630";
1	Araport11	CDS	229206	229343	.	+	0	transcript_id "AT1G01630.1"; gene_id "AT1G01630";
1	Araport11	CDS	229429	229724	.	+	0	transcript_id "AT1G01630.1"; gene_id "AT1G01630";
1	Araport11	CDS	229829	229934	.	+	1	transcript_id "AT1G01630.1"; gene_id "AT1G01630";
1	Araport11	CDS	230349	230459	.	+	0	transcript_id "AT1G01630.1"; gene_id "AT1G01630";
1	Araport11	CDS	230559	230675	.	+	0	transcript_id "AT1G01630.1"; gene_id "AT1G01630";
1	StringTie	transcript	229011	231788	1000	+	.	transcript_id "STRG.54.2"; gene_id "STRG.54"; locus "RLOC_00000073";
1	StringTie	exon	229011	229343	1000	+	.	transcript_id "STRG.54.2"; gene_id "STRG.54";
1	StringTie	exon	229429	229724	1000	+	.	transcript_id "STRG.54.2"; gene_id "STRG.54";
1	StringTie	exon	229829	229934	1000	+	.	transcript_id "STRG.54.2"; gene_id "STRG.54";
1	StringTie	exon	230349	230459	1000	+	.	transcript_id "STRG.54.2"; gene_id "STRG.54";
1	StringTie	exon	230559	230681	1000	+	.	transcript_id "STRG.54.2"; gene_id "STRG.54";
1	StringTie	exon	231171	231788	1000	+	.	transcript_id "STRG.54.2"; gene_id "STRG.54";
1	Araport11	transcript	230908	232630	.	-	.	transcript_id "AT1G01640.1"; gene_id "AT1G01640"; locus "RLOC_00000074";
1	Araport11	exon	230908	231655	.	-	.	transcript_id "AT1G01640.1"; gene_id "AT1G01640";
1	Araport11	exon	231784	231928	.	-	.	transcript_id "AT1G01640.1"; gene_id "AT1G01640";
1	Araport11	exon	232398	232630	.	-	.	transcript_id "AT1G01640.1"; gene_id "AT1G01640";
1	Araport11	CDS	231164	231655	.	-	0	transcript_id "AT1G01640.1"; gene_id "AT1G01640";
1	Araport11	CDS	231784	231915	.	-	0	transcript_id "AT1G01640.1"; gene_id "AT1G01640";
1	Araport11	transcript	230908	232630	.	-	.	transcript_id "AT1G01640.2"; gene_id "AT1G01640"; locus "RLOC_00000074";
1	Araport11	exon	230908	231655	.	-	.	transcript_id "AT1G01640.2"; gene_id "AT1G01640";
1	Araport11	exon	231784	231908	.	-	.	transcript_id "AT1G01640.2"; gene_id "AT1G01640";
1	Araport11	exon	232398	232630	.	-	.	transcript_id "AT1G01640.2"; gene_id "AT1G01640";
1	Araport11	CDS	231164	231655	.	-	0	transcript_id "AT1G01640.2"; gene_id "AT1G01640";
1	Araport11	CDS	231784	231852	.	-	0	transcript_id "AT1G01640.2"; gene_id "AT1G01640";
1	StringTie	transcript	232822	237813	1000	-	.	transcript_id "STRG.59.2"; gene_id "STRG.59"; locus "RLOC_00000075";
1	StringTie	exon	232822	233297	1000	-	.	transcript_id "STRG.59.2"; gene_id "STRG.59";
1	StringTie	exon	233387	233470	1000	-	.	transcript_id "STRG.59.2"; gene_id "STRG.59";
1	StringTie	exon	233548	233618	1000	-	.	transcript_id "STRG.59.2"; gene_id "STRG.59";
1	StringTie	exon	234250	234621	1000	-	.	transcript_id "STRG.59.2"; gene_id "STRG.59";
1	StringTie	exon	234935	234988	1000	-	.	transcript_id "STRG.59.2"; gene_id "STRG.59";
1	StringTie	exon	235198	235360	1000	-	.	transcript_id "STRG.59.2"; gene_id "STRG.59";
1	StringTie	exon	235718	235752	1000	-	.	transcript_id "STRG.59.2"; gene_id "STRG.59";
1	StringTie	exon	235845	236027	1000	-	.	transcript_id "STRG.59.2"; gene_id "STRG.59";
1	StringTie	exon	236145	236296	1000	-	.	transcript_id "STRG.59.2"; gene_id "STRG.59";
1	StringTie	exon	236429	236548	1000	-	.	transcript_id "STRG.59.2"; gene_id "STRG.59";
1	StringTie	exon	236673	236784	1000	-	.	transcript_id "STRG.59.2"; gene_id "STRG.59";
1	StringTie	exon	236865	237023	1000	-	.	transcript_id "STRG.59.2"; gene_id "STRG.59";
1	StringTie	exon	237504	237813	1000	-	.	transcript_id "STRG.59.2"; gene_id "STRG.59";
1	StringTie	transcript	232822	237813	1000	-	.	transcript_id "STRG.59.3"; gene_id "STRG.59"; locus "RLOC_00000075";
1	StringTie	exon	232822	233297	1000	-	.	transcript_id "STRG.59.3"; gene_id "STRG.59";
1	StringTie	exon	233387	233470	1000	-	.	transcript_id "STRG.59.3"; gene_id "STRG.59";
1	StringTie	exon	233548	233618	1000	-	.	transcript_id "STRG.59.3"; gene_id "STRG.59";
1	StringTie	exon	234250	234392	1000	-	.	transcript_id "STRG.59.3"; gene_id "STRG.59";
1	StringTie	exon	234529	234621	1000	-	.	transcript_id "STRG.59.3"; gene_id "STRG.59";
1	StringTie	exon	234935	234988	1000	-	.	transcript_id "STRG.59.3"; gene_id "STRG.59";
1	StringTie	exon	235198	235360	1000	-	.	transcript_id "STRG.59.3"; gene_id "STRG.59";
1	StringTie	exon	235718	235752	1000	-	.	transcript_id "STRG.59.3"; gene_id "STRG.59";
1	StringTie	exon	235845	236027	1000	-	.	transcript_id "STRG.59.3"; gene_id "STRG.59";
1	StringTie	exon	236145	236296	1000	-	.	transcript_id "STRG.59.3"; gene_id "STRG.59";
1	StringTie	exon	236429	236548	1000	-	.	transcript_id "STRG.59.3"; gene_id "STRG.59";
1	StringTie	exon	236673	237023	1000	-	.	transcript_id "STRG.59.3"; gene_id "STRG.59";
1	StringTie	exon	237504	237813	1000	-	.	transcript_id "STRG.59.3"; gene_id "STRG.59";
1	StringTie	CDS	233188	233297	.	-	2	transcript_id "STRG.59.3"; gene_id "STRG.59";
1	StringTie	CDS	233387	233470	.	-	2	transcript_id "STRG.59.3"; gene_id "STRG.59";
1	StringTie	CDS	233548	233618	.	-	1	transcript_id "STRG.59.3"; gene_id "STRG.59";
1	StringTie	CDS	234250	234392	.	-	0	transcript_id "STRG.59.3"; gene_id "STRG.59";
1	StringTie	CDS	234529	234621	.	-	0	transcript_id "STRG.59.3"; gene_id "STRG.59";
1	StringTie	CDS	234935	234988	.	-	0	transcript_id "STRG.59.3"; gene_id "STRG.59";
1	StringTie	CDS	235198	235360	.	-	1	transcript_id "STRG.59.3"; gene_id "STRG.59";
1	StringTie	CDS	235718	235752	.	-	0	transcript_id "STRG.59.3"; gene_id "STRG.59";
1	StringTie	CDS	235845	236027	.	-	0	transcript_id "STRG.59.3"; gene_id "STRG.59";
1	StringTie	CDS	236145	236296	.	-	2	transcript_id "STRG.59.3"; gene_id "STRG.59";
1	StringTie	CDS	236429	236537	.	-	0	transcript_id "STRG.59.3"; gene_id "STRG.59";
1	StringTie	transcript	232822	237813	1000	-	.	transcript_id "STRG.59.4"; gene_id "STRG.59"; locus "RLOC_00000075";
1	StringTie	exon	232822	233297	1000	-	.	transcript_id "STRG.59.4"; gene_id "STRG.59";
1	StringTie	exon	233387	233470	1000	-	.	transcript_id "STRG.59.4"; gene_id "STRG.59";
1	StringTie	exon	233548	234621	1000	-	.	transcript_id "STRG.59.4"; gene_id "STRG.59";
1	StringTie	exon	234935	234988	1000	-	.	transcript_id "STRG.59.4"; gene_id "STRG.59";
1	StringTie	exon	235198	235360	1000	-	.	transcript_id "STRG.59.4"; gene_id "STRG.59";
1	StringTie	exon	235718	235752	1000	-	.	transcript_id "STRG.59.4"; gene_id "STRG.59";
1	StringTie	exon	235845	236027	1000	-	.	transcript_id "STRG.59.4"; gene_id "STRG.59";
1	StringTie	exon	236145	236296	1000	-	.	transcript_id "STRG.59.4"; gene_id "STRG.59";
1	StringTie	exon	236429	236548	1000	-	.	transcript_id "STRG.59.4"; gene_id "STRG.59";
1	StringTie	exon	236673	236784	1000	-	.	transcript_id "STRG.59.4"; gene_id "STRG.59";
1	StringTie	exon	236865	237023	1000	-	.	transcript_id "STRG.59.4"; gene_id "STRG.59";
1	StringTie	exon	237504	237813	1000	-	.	transcript_id "STRG.59.4"; gene_id "STRG.59";
1	Araport11	transcript	232840	237905	.	-	.	transcript_id "AT1G01650.1"; gene_id "AT1G01650"; locus "RLOC_00000075";
1	Araport11	exon	232840	233297	.	-	.	transcript_id "AT1G01650.1"; gene_id "AT1G01650";
1	Araport11	exon	233387	233470	.	-	.	transcript_id "AT1G01650.1"; gene_id "AT1G01650";
1	Araport11	exon	233548	233618	.	-	.	transcript_id "AT1G01650.1"; gene_id "AT1G01650";
1	Araport11	exon	234250	234392	.	-	.	transcript_id "AT1G01650.1"; gene_id "AT1G01650";
1	Araport11	exon	234529	234621	.	-	.	transcript_id "AT1G01650.1"; gene_id "AT1G01650";
1	Araport11	exon	234935	234988	.	-	.	transcript_id "AT1G01650.1"; gene_id "AT1G01650";
1	Araport11	exon	235198	235360	.	-	.	transcript_id "AT1G01650.1"; gene_id "AT1G01650";
1	Araport11	exon	235718	235752	.	-	.	transcript_id "AT1G01650.1"; gene_id "AT1G01650";
1	Araport11	exon	235845	236027	.	-	.	transcript_id "AT1G01650.1"; gene_id "AT1G01650";
1	Araport11	exon	236145	236296	.	-	.	transcript_id "AT1G01650.1"; gene_id "AT1G01650";
1	Araport11	exon	236429	236548	.	-	.	transcript_id "AT1G01650.1"; gene_id "AT1G01650";
1	Araport11	exon	236673	236784	.	-	.	transcript_id "AT1G01650.1"; gene_id "AT1G01650";
1	Araport11	exon	236865	237023	.	-	.	transcript_id "AT1G01650.1"; gene_id "AT1G01650";
1	Araport11	exon	237504	237905	.	-	.	transcript_id "AT1G01650.1"; gene_id "AT1G01650";
1	Araport11	CDS	233188	233297	.	-	2	transcript_id "AT1G01650.1"; gene_id "AT1G01650";
1	Araport11	CDS	233387	233470	.	-	2	transcript_id "AT1G01650.1"; gene_id "AT1G01650";
1	Araport11	CDS	233548	233618	.	-	1	transcript_id "AT1G01650.1"; gene_id "AT1G01650";
1	Araport11	CDS	234250	234392	.	-	0	transcript_id "AT1G01650.1"; gene_id "AT1G01650";
1	Araport11	CDS	234529	234621	.	-	0	transcript_id "AT1G01650.1"; gene_id "AT1G01650";
1	Araport11	CDS	234935	234988	.	-	0	transcript_id "AT1G01650.1"; gene_id "AT1G01650";
1	Araport11	CDS	235198	235360	.	-	1	transcript_id "AT1G01650.1"; gene_id "AT1G01650";
1	Araport11	CDS	235718	235752	.	-	0	transcript_id "AT1G01650.1"; gene_id "AT1G01650";
1	Araport11	CDS	235845	236027	.	-	0	transcript_id "AT1G01650.1"; gene_id "AT1G01650";
1	Araport11	CDS	236145	236296	.	-	2	transcript_id "AT1G01650.1"; gene_id "AT1G01650";
1	Araport11	CDS	236429	236548	.	-	2	transcript_id "AT1G01650.1"; gene_id "AT1G01650";
1	Araport11	CDS	236673	236784	.	-	0	transcript_id "AT1G01650.1"; gene_id "AT1G01650";
1	Araport11	CDS	236865	237023	.	-	0	transcript_id "AT1G01650.1"; gene_id "AT1G01650";
1	Araport11	CDS	237504	237647	.	-	0	transcript_id "AT1G01650.1"; gene_id "AT1G01650";
1	Araport11	transcript	232841	237817	.	-	.	transcript_id "AT1G01650.2"; gene_id "AT1G01650"; locus "RLOC_00000075";
1	Araport11	exon	232841	233297	.	-	.	transcript_id "AT1G01650.2"; gene_id "AT1G01650";
1	Araport11	exon	233387	233470	.	-	.	transcript_id "AT1G01650.2"; gene_id "AT1G01650";
1	Araport11	exon	233548	233618	.	-	.	transcript_id "AT1G01650.2"; gene_id "AT1G01650";
[truncated: 802,150 more rows]
