# Supplementary material for: Widespread premature transcription termination of Arabidopsis thaliana NLR genes by the spen protein FPA
Source: eLife. 2021 Apr 27;10:e65537. doi: 10.7554/eLife.65537 (PMC8116057; doi:10.7554/eLife.65537)
Supplement: Figure 2—source data 2. [file elife-65537-fig2-data2.tds]

1	5885	13714	RLOC_00000002	278	-	277.7	271.5	0.329	0.61	66	60
1	31115	33315	RLOC_00000006	11	-	10.9	10.2	0.307	0.589	208	216
1	33364	37871	RLOC_00000008	23	-	22.6	-10.6	0.845	0.933	189	121
1	44797	49306	RLOC_00000011	101	-	101.4	-90.6	0.0605	0.287	774	641
1	49908	51210	RLOC_00000012	7	-	6.5	6.4	1.02e-05	0.00104	2226	1823
1	57163	59215	RLOC_00000014	3	-	2.8	-2.0	0.216	0.498	257	253
1	61904	67705	RLOC_00000015	99	-	99.2	-93.2	0.182	0.458	160	88
1	72315	74250	RLOC_00000017	13	+	12.6	-7.7	0.0502	0.26	122	84
1	73200	75031	RLOC_00000019	17	-	16.6	15.9	7.96e-07	0.000163	450	354
1	75389	76845	RLOC_00000021	7	+	7.1	-2.0	0.929	0.967	54	34
1	88621	90698	RLOC_00000025	88	+	88.1	-87.0	0.0798	0.32	74	55
1	91341	95704	RLOC_00000027	3	+	2.7	-1.4	0.969	0.984	25	34
1	95838	99251	RLOC_00000029	37	+	37.2	-26.7	0.547	0.779	150	154
1	99865	101987	RLOC_00000030	50	+	50.4	-34.6	0.834	0.93	162	104
1	108945	111699	RLOC_00000032	44	+	44.3	38.4	0.522	0.762	76	65
1	114191	116417	RLOC_00000035	197	+	197.0	197.0	0.000355	0.014	61	47
1	116783	118845	RLOC_00000036	3	+	3.4	0.1	0.997	0.998	130	84
1	120081	130716	RLOC_00000038	106	-	105.8	-69.4	0.526	0.765	292	256
1	136089	138163	RLOC_00000042	38	+	37.8	-9.6	0.141	0.412	39	43
1	141869	143261	RLOC_00000044	8	+	7.5	-1.1	0.154	0.428	61	43
1	154175	156058	RLOC_00000050	16	-	15.9	-15.8	0.424	0.689	39	36
1	156476	158823	RLOC_00000051	4	-	4.5	-0.4	0.729	0.885	375	205
1	159618	162953	RLOC_00000052	34	-	33.7	-31.0	0.0502	0.26	47	40
1	171524	172948	RLOC_00000057	3	-	2.5	0.9	0.469	0.724	501	233
1	180016	182749	RLOC_00000060	7	-	7.1	-1.7	0.665	0.85	455	293
1	185032	187135	RLOC_00000061	16	+	16.1	3.3	0.366	0.642	85	62
1	187161	193138	RLOC_00000062	809	+	809.2	809.1	3.59e-05	0.00256	136	111
1	195644	198787	RLOC_00000064	14	+	13.9	11.7	0.113	0.375	145	136
1	199526	201781	RLOC_00000065	4	+	4.4	-0.1	0.0939	0.347	637	626
1	221641	224351	RLOC_00000071	5	-	4.8	0.1	0.711	0.873	197	154
1	225615	227528	RLOC_00000072	5	-	5.3	-3.5	0.000892	0.026	2328	2150
1	228798	231788	RLOC_00000073	60	+	59.9	17.5	0.0101	0.113	207	139
1	232821	237905	RLOC_00000075	33	-	33.0	32.8	0.112	0.374	85	62
1	258761	267883	RLOC_00000081	187	+	186.8	33.5	0.782	0.91	103	67
1	267992	270517	RLOC_00000084	7	+	7.4	-7.2	0.135	0.405	216	162
1	269757	274930	RLOC_00000085	40	-	39.8	-37.6	0.736	0.888	97	88
1	270796	272189	RLOC_00000086	8	+	7.5	-5.1	0.307	0.589	114	84
1	284349	291222	RLOC_00000091	31	+	31.2	11.8	0.0317	0.209	163	166
1	293245	295096	RLOC_00000093	3	+	3.0	2.6	0.703	0.869	203	235
1	295843	298262	RLOC_00000095	6	-	6.5	0.7	0.382	0.655	186	163
1	313097	316090	RLOC_00000106	20	-	19.7	9.4	0.94	0.971	120	89
1	322428	324941	RLOC_00000110	31	+	30.5	-26.1	0.178	0.453	66	40
1	325315	330619	RLOC_00000111	13	+	12.6	12.0	0.347	0.626	41	35
1	330535	337912	RLOC_00000112	136	-	135.5	133.6	0.085	0.331	101	101
1	338241	340093	RLOC_00000113	13	+	12.9	-12.7	0.0724	0.307	54	54
1	342818	344345	RLOC_00000115	87	-	87.0	82.5	0.000653	0.0208	129	74
1	373334	386913	RLOC_00000124	50	+	50.5	48.0	0.546	0.778	83	80
1	386760	389808	RLOC_00000125	205	-	205.2	187.5	0.212	0.494	95	72
1	389820	400001	RLOC_00000126	623	+	623.4	622.9	0.0446	0.244	239	226
1	399982	401919	RLOC_00000127	59	-	59.1	-44.1	0.609	0.818	203	193
1	403099	404456	RLOC_00000130	4	-	3.6	2.2	0.647	0.838	461	343
1	404594	414345	RLOC_00000131	77	+	77.4	-50.3	0.596	0.809	584	440
1	418415	422579	RLOC_00000134	54	+	54.0	53.8	0.304	0.586	120	57
1	443099	446296	RLOC_00000142	6	-	5.7	-3.6	0.853	0.936	62	48
1	448420	452755	RLOC_00000143	124	-	124.4	121.6	0.0775	0.315	250	186
1	455668	458204	RLOC_00000145	10	+	10.4	2.8	0.136	0.405	260	241
1	461829	467946	RLOC_00000150	209	-	209.3	191.7	0.000668	0.0211	1262	656
1	469386	471809	RLOC_00000151	43	+	42.7	-14.5	0.293	0.574	205	152
1	470041	471625	RLOC_00000152	5	-	4.6	3.5	0.0609	0.288	382	397
1	511757	515451	RLOC_00000165	334	-	334.3	313.9	0.000492	0.0175	223	133
1	518090	520495	RLOC_00000168	3	+	2.7	-0.4	0.775	0.907	964	1059
1	537739	540127	RLOC_00000174	6	+	6.2	5.3	0.13	0.397	965	715
1	553010	556152	RLOC_00000181	3	-	3.4	1.3	0.973	0.986	116	35
1	564017	567857	RLOC_00000186	48	+	48.0	9.0	0.566	0.79	74	77
1	571825	575085	RLOC_00000188	83	-	82.9	-82.9	0.0269	0.194	118	42
1	580635	583195	RLOC_00000190	99	+	98.6	98.6	0.0134	0.134	55	38
1	607798	609534	RLOC_00000201	8	-	7.6	-0.2	0.177	0.452	3226	2405
1	621452	623054	RLOC_00000206	54	+	54.5	-51.5	0.0315	0.209	74	90
1	623655	624567	RLOC_00000207	10	-	10.2	-5.0	0.00547	0.078	311	142
1	626638	629996	RLOC_00000209	17	+	16.5	-12.5	0.267	0.55	263	247
1	630373	633420	RLOC_00000210	37	+	36.7	-36.7	0.0959	0.352	76	77
1	635133	637367	RLOC_00000211	16	+	15.7	-12.8	0.2	0.48	81	65
1	637207	638684	RLOC_00000213	21	-	20.7	-11.0	0.215	0.497	112	51
1	642504	644903	RLOC_00000217	11	-	11.1	6.3	0.981	0.989	30	42
1	645062	651988	RLOC_00000218	32	-	32.2	-31.6	0.114	0.376	85	103
1	653603	654457	RLOC_00000219	11	-	11.2	-3.8	0.319	0.601	33	71
1	655509	658205	RLOC_00000220	14	-	13.6	-12.8	0.138	0.408	131	124
1	681330	687385	RLOC_00000230	40	-	40.5	-10.5	0.0493	0.257	40	47
1	687785	692660	RLOC_00000231	92	-	92.0	-89.1	0.536	0.772	51	35
1	703829	706689	RLOC_00000235	5	-	4.9	1.0	0.612	0.819	94	72
1	712439	727553	RLOC_00000238	234	-	233.9	-233.7	0.734	0.887	46	66
1	731553	738306	RLOC_00000240	9	-	9.4	4.5	0.178	0.453	65	58
1	739672	746782	RLOC_00000241	59	+	58.6	-51.1	0.599	0.811	144	110
1	748033	749048	RLOC_00000245	11	-	10.6	8.1	0.6	0.812	42	50
1	749243	752000	RLOC_00000246	7	+	6.7	-1.3	0.781	0.91	61	32
1	752981	756340	RLOC_00000248	11	-	11.3	-2.3	0.00128	0.032	6174	3979
1	754266	758692	RLOC_00000249	161	+	161.3	160.7	0.0834	0.327	96	74
1	761267	768235	RLOC_00000251	55	+	54.9	-54.4	0.214	0.496	75	57
1	786831	788722	RLOC_00000258	21	+	20.8	5.3	0.504	0.752	185	210
1	789819	791689	RLOC_00000259	11	+	10.7	-8.1	0.098	0.356	60	40
1	793284	798461	RLOC_00000261	45	-	45.3	-41.4	0.69	0.862	145	89
1	802969	807112	RLOC_00000263	11	+	11.2	-9.9	0.229	0.513	110	91
1	807360	813216	RLOC_00000264	8	+	8.1	6.4	0.332	0.612	66	66
1	813412	816812	RLOC_00000266	8	+	8.5	8.5	0.309	0.591	71	48
1	817933	819563	RLOC_00000269	7	-	7.4	6.1	0.707	0.871	167	146
1	822581	824410	RLOC_00000271	5	-	5.2	-1.0	0.578	0.798	97	97
1	835770	844311	RLOC_00000275	168	+	167.6	142.5	0.0479	0.253	92	70
1	842560	844226	RLOC_00000277	9	-	9.2	7.6	0.933	0.969	76	79
1	844440	847769	RLOC_00000278	394	-	393.7	393.7	0.032	0.21	52	64
1	845676	849655	RLOC_00000279	79	+	78.5	-22.5	0.601	0.813	128	94
1	852290	855027	RLOC_00000280	15	+	15.3	-5.5	0.839	0.931	68	40
1	868852	871308	RLOC_00000284	10	-	10.4	10.3	0.000657	0.0209	332	264
1	873171	875898	RLOC_00000287	207	-	206.6	206.6	0.223	0.506	61	51
1	877725	880243	RLOC_00000290	22	-	22.5	21.8	0.944	0.972	39	36
1	894231	897718	RLOC_00000297	108	-	108.0	-106.2	0.0759	0.313	69	52
1	898479	899794	RLOC_00000298	1	+	1.2	-0.2	0.647	0.838	2683	2035
1	900684	903056	RLOC_00000300	11	+	11.5	-9.4	0.473	0.726	268	142
1	907522	909650	RLOC_00000302	5	+	5.4	5.0	0.191	0.47	703	426
1	916771	918064	RLOC_00000307	3	-	3.1	-0.0	0.0444	0.244	1476	1154
1	933425	937152	RLOC_00000314	14	+	13.5	10.7	0.6	0.812	53	63
1	975840	977911	RLOC_00000329	158	-	158.2	156.5	0.0966	0.353	30	70
1	979306	982002	RLOC_00000330	9	-	8.9	0.2	0.79	0.914	214	175
1	982371	983591	RLOC_00000331	15	-	15.0	4.9	0.0938	0.347	604	798
1	991105	993126	RLOC_00000334	5	+	5.5	-4.6	0.817	0.922	208	212
1	996075	1000629	RLOC_00000336	13	+	13.1	12.2	0.347	0.626	73	69
1	1004672	1008407	RLOC_00000338	9	+	9.4	6.8	0.264	0.547	96	86
1	1011146	1013365	RLOC_00000341	9	-	9.4	4.6	0.485	0.737	48	46
1	1018057	1019247	RLOC_00000343	10	+	9.5	-9.5	0.118	0.383	62	37
1	1024392	1029108	RLOC_00000347	46	-	46.3	31.0	0.886	0.95	59	68
1	1042229	1043931	RLOC_00000352	14	-	14.4	13.6	0.266	0.549	156	217
1	1050504	1051194	RLOC_00000355	8	-	8.3	6.2	0.534	0.77	52	48
1	1051304	1056838	RLOC_00000356	31	+	31.5	30.4	0.602	0.814	109	121
1	1064263	1071080	RLOC_00000361	37	-	37.3	37.3	0.00227	0.045	58	71
1	1075507	1080630	RLOC_00000364	10	-	10.2	0.2	0.291	0.573	189	153
1	1096881	1100078	RLOC_00000367	8	+	8.2	-4.1	0.392	0.662	265	206
1	1106353	1108725	RLOC_00000369	15	-	14.8	-4.1	0.00567	0.0798	111	89
1	1114363	1119800	RLOC_00000371	29	+	29.4	-29.3	0.075	0.311	61	60
1	1128088	1129689	RLOC_00000375	6	-	6.0	-5.3	0.0877	0.337	404	307
1	1136122	1138713	RLOC_00000377	7	+	7.3	-4.2	0.55	0.78	391	348
1	1140277	1143130	RLOC_00000378	15	-	14.5	-11.7	0.071	0.304	1983	1548
1	1143431	1157788	RLOC_00000379	408	-	408.5	67.7	0.222	0.505	337	284
1	1162893	1166198	RLOC_00000383	24	-	24.0	-18.9	0.0658	0.295	75	79
1	1164909	1167135	RLOC_00000384	14	+	14.2	4.2	0.0421	0.238	258	239
1	1185511	1188696	RLOC_00000390	6	-	6.4	-0.7	0.0942	0.348	286	217
1	1188994	1191458	RLOC_00000391	2	-	1.9	-0.7	0.65	0.84	1723	1510
1	1191518	1193884	RLOC_00000392	3	+	3.3	2.4	0.799	0.917	274	224
1	1197955	1201579	RLOC_00000394	8	+	8.0	1.7	0.346	0.625	267	260
1	1202154	1208059	RLOC_00000395	59	+	59.1	-52.6	0.387	0.658	109	127
1	1215912	1217548	RLOC_00000401	5	+	5.0	-0.3	0.0653	0.295	902	651
1	1226482	1230947	RLOC_00000407	11	+	10.8	10.8	0.109	0.371	106	73
1	1234175	1236206	RLOC_00000409	18	-	18.1	-10.6	0.00527	0.0768	185	171
1	1240293	1242209	RLOC_00000412	7	+	7.4	-5.0	0.0275	0.195	84	82
1	1244968	1246117	RLOC_00000414	4	+	4.0	1.4	0.632	0.83	52	87
1	1252004	1261458	RLOC_00000416	705	-	705.1	703.4	0.0161	0.148	67	38
1	1287830	1291105	RLOC_00000420	14	-	14.4	9.7	0.474	0.727	167	141
1	1291311	1293396	RLOC_00000421	16	+	15.8	-6.0	0.887	0.95	120	112
1	1303466	1307973	RLOC_00000427	96	-	96.4	90.6	0.0529	0.267	121	136
1	1313442	1315823	RLOC_00000428	13	+	12.8	7.6	0.304	0.586	330	238
1	1321901	1324865	RLOC_00000430	8	+	8.5	-5.5	0.462	0.719	49	40
1	1331465	1333651	RLOC_00000433	12	-	12.4	12.4	0.0194	0.162	334	276
1	1336269	1337903	RLOC_00000436	12	-	12.1	-0.5	0.297	0.579	76	47
1	1340540	1343894	RLOC_00000438	35	-	34.5	22.9	0.673	0.853	94	63
1	1345041	1355483	RLOC_00000439	691	+	690.6	689.8	0.118	0.383	127	93
1	1348451	1349478	RLOC_00000440	4	-	4.5	-2.3	0.349	0.627	203	98
1	1356083	1358547	RLOC_00000441	3	-	3.2	1.7	0.556	0.783	1135	708
1	1358573	1362019	RLOC_00000442	23	-	22.7	19.9	0.715	0.876	51	38
1	1365044	1368940	RLOC_00000444	5	-	5.4	-4.7	0.725	0.882	151	179
1	1369035	1373107	RLOC_00000445	12	-	11.6	10.4	0.228	0.512	65	53
1	1373229	1375821	RLOC_00000446	31	-	31.4	-30.7	0.223	0.506	94	65
1	1387798	1391381	RLOC_00000452	24	-	24.3	-18.4	0.88	0.948	48	60
1	1399173	1403195	RLOC_00000456	29	+	28.7	-12.0	0.736	0.888	249	194
1	1403084	1407531	RLOC_00000457	42	-	42.2	-40.1	0.79	0.914	44	51
1	1407771	1410933	RLOC_00000458	8	-	8.0	-6.8	0.544	0.777	86	76
1	1411133	1413768	RLOC_00000459	23	+	23.0	-18.4	0.422	0.688	74	101
1	1416310	1421863	RLOC_00000461	61	-	61.5	-58.0	0.612	0.819	121	115
1	1431176	1433010	RLOC_00000465	33	-	33.4	-29.2	0.0837	0.328	1842	1628
1	1450917	1455317	RLOC_00000474	518	-	518.0	517.8	0.063	0.292	71	50
1	1457006	1458802	RLOC_00000475	13	-	13.1	13.1	0.257	0.539	131	87
1	1463038	1466052	RLOC_00000480	7	+	7.4	6.5	0.865	0.942	63	60
1	1471358	1476303	RLOC_00000482	75	-	74.7	-73.9	0.558	0.784	39	47
1	1477413	1478932	RLOC_00000483	10	-	9.8	-4.7	0.293	0.574	223	338
1	1482517	1484119	RLOC_00000486	3	+	2.7	0.3	0.555	0.783	216	193
1	1484066	1487027	RLOC_00000487	17	-	17.2	-7.0	0.38	0.652	76	82
1	1487371	1494236	RLOC_00000488	118	-	117.7	29.0	0.822	0.924	71	64
1	1498113	1501953	RLOC_00000490	10	-	10.4	7.8	0.548	0.779	64	72
1	1502242	1503943	RLOC_00000491	3	-	3.5	-0.1	0.000732	0.0224	1410	1138
1	1504939	1509261	RLOC_00000492	117	+	116.8	116.8	0.0433	0.242	63	55
1	1509102	1510341	RLOC_00000494	3	-	3.0	1.1	0.809	0.92	73	59
1	1531638	1534767	RLOC_00000504	6	-	6.0	1.5	0.439	0.702	54	57
1	1553567	1557855	RLOC_00000514	28	+	28.1	28.1	0.00393	0.0644	57	28
1	1558769	1559919	RLOC_00000516	4	-	4.3	1.9	0.804	0.918	89	96
1	1560624	1564409	RLOC_00000517	12	-	12.2	11.1	0.153	0.426	60	53
1	1564490	1567516	RLOC_00000518	14	+	14.3	-10.7	0.0218	0.172	33	34
1	1576821	1582672	RLOC_00000520	51	+	51.1	-51.1	0.811	0.92	76	61
1	1582499	1583728	RLOC_00000521	23	-	23.0	19.5	0.266	0.549	87	62
1	1585343	1587806	RLOC_00000524	8	-	8.1	7.6	0.539	0.773	48	29
1	1594052	1595923	RLOC_00000526	25	-	24.6	-24.4	0.401	0.671	93	74
1	1624930	1629303	RLOC_00000532	14	+	13.9	10.5	0.178	0.453	96	88
1	1630848	1636018	RLOC_00000534	18	-	17.9	17.9	0.0301	0.206	67	67
1	1645299	1647435	RLOC_00000538	51	+	50.8	50.8	0.0136	0.134	37	45
1	1669349	1673923	RLOC_00000544	218	+	218.0	-214.7	0.207	0.489	76	79
1	1678880	1681710	RLOC_00000547	19	+	19.4	-19.2	0.175	0.45	38	32
1	1717388	1718909	RLOC_00000560	5	-	5.2	-3.3	0.246	0.529	120	80
1	1744760	1754043	RLOC_00000573	1016	+	1016.1	1016.1	5.67e-05	0.00349	152	121
1	1754129	1763903	RLOC_00000574	245	+	245.3	-212.4	0.022	0.173	181	88
1	1762316	1766317	RLOC_00000575	47	-	47.4	46.2	0.537	0.772	64	66
1	1766502	1768837	RLOC_00000577	5	-	5.4	-4.8	0.00629	0.0858	2146	1579
1	1771358	1773376	RLOC_00000579	121	-	120.5	120.4	0.0423	0.239	130	116
1	1779255	1784681	RLOC_00000581	20	+	20.3	12.2	0.766	0.903	105	124
1	1786845	1789736	RLOC_00000583	25	+	24.6	-21.8	0.23	0.514	63	42
1	1790168	1796736	RLOC_00000584	50	+	49.6	47.6	0.709	0.872	42	40
1	1800534	1803987	RLOC_00000587	39	-	39.2	-26.5	0.196	0.475	82	99
1	1807944	1815568	RLOC_00000589	17	-	16.8	-11.5	0.813	0.921	61	62
1	1815813	1817336	RLOC_00000590	60	-	59.8	59.6	0.00896	0.106	33	26
1	1820270	1821994	RLOC_00000594	9	-	9.3	5.6	0.668	0.851	48	34
1	1822599	1826269	RLOC_00000595	358	+	358.0	344.4	0.022	0.173	62	36
1	1827995	1829944	RLOC_00000597	2	-	2.4	0.2	0.513	0.757	1457	1268
1	1832940	1834942	RLOC_00000600	7	+	7.1	3.1	0.161	0.436	82	71
1	1834761	1838066	RLOC_00000601	11	-	11.2	-5.4	0.53	0.767	80	52
1	1843378	1846328	RLOC_00000603	4	+	3.6	2.4	0.995	0.996	1056	240
1	1851315	1855173	RLOC_00000605	302	-	302.0	268.6	0.00126	0.0318	103	64
1	1857730	1860938	RLOC_00000608	39	-	39.4	27.8	0.515	0.759	68	64
1	1867000	1873851	RLOC_00000612	53	-	52.9	43.1	0.645	0.838	84	65
1	1889141	1891391	RLOC_00000617	5	+	4.5	-3.8	0.877	0.947	58	54
1	1892230	1894194	RLOC_00000618	17	-	17.5	16.6	0.421	0.687	195	139
1	1894226	1896974	RLOC_00000619	10	-	10.1	-4.7	0.293	0.574	207	149
1	1897119	1899280	RLOC_00000620	12	+	11.8	-7.9	0.232	0.516	90	62
1	1899943	1904896	RLOC_00000621	17	+	16.8	16.6	0.0214	0.171	152	98
1	1906962	1911061	RLOC_00000623	9	+	8.8	7.7	0.699	0.867	127	108
1	1922207	1926303	RLOC_00000629	11	+	11.5	-7.1	0.845	0.933	128	136
1	1938833	1940496	RLOC_00000635	15	-	14.6	14.3	0.456	0.714	171	108
1	1946780	1950889	RLOC_00000638	7	+	7.2	6.0	0.0767	0.314	189	189
1	1950595	1952880	RLOC_00000639	68	-	67.5	-33.2	0.00483	0.0741	178	175
1	1954673	1958866	RLOC_00000641	5	+	4.7	1.1	0.935	0.97	202	274
1	1960030	1963189	RLOC_00000643	44	-	44.3	44.0	0.0721	0.306	512	471
1	1965594	1969558	RLOC_00000645	73	-	72.8	72.8	0.00142	0.0334	311	156
1	1969657	1974526	RLOC_00000648	35	+	34.8	-10.7	0.741	0.89	38	42
1	1989430	1990754	RLOC_00000652	31	+	31.1	-30.9	0.431	0.695	36	33
1	1990615	1992837	RLOC_00000654	11	-	10.6	9.3	0.389	0.66	132	82
1	1992228	1997541	RLOC_00000656	366	+	365.9	359.1	0.00379	0.0628	121	74
1	2001327	2003651	RLOC_00000658	103	+	102.8	102.7	0.00181	0.039	157	96
1	2001405	2007209	RLOC_00000659	24	-	23.8	17.8	0.762	0.902	52	51
1	2010882	2013594	RLOC_00000661	9	-	8.8	0.6	0.33	0.611	275	246
1	2027605	2034056	RLOC_00000665	137	+	136.7	119.0	0.446	0.706	222	193
1	2034165	2037471	RLOC_00000666	83	+	83.5	-82.2	0.244	0.527	226	155
1	2040409	2049742	RLOC_00000669	7	+	7.1	5.1	0.000407	0.0154	17005	12055
1	2048863	2052180	RLOC_00000670	18	-	18.0	8.6	0.451	0.71	242	171
1	2052222	2055548	RLOC_00000671	7	-	6.8	3.7	0.94	0.971	208	209
1	2055744	2067483	RLOC_00000672	248	-	248.4	-153.0	0.508	0.755	60	43
1	2076083	2077701	RLOC_00000677	7	-	6.6	-6.5	0.0105	0.115	581	828
1	2083310	2087141	RLOC_00000680	38	+	37.8	-26.6	0.4	0.67	28	42
1	2092902	2096784	RLOC_00000685	24	-	24.1	-24.1	0.102	0.361	72	62
1	2097615	2103497	RLOC_00000687	16	-	16.3	-15.1	0.0806	0.321	34	43
1	2108511	2111063	RLOC_00000692	5	+	4.9	-0.6	0.925	0.966	48	41
1	2111322	2114686	RLOC_00000695	25	-	24.6	-5.9	0.502	0.751	122	97
1	2114884	2121433	RLOC_00000696	87	-	87.5	-86.0	0.936	0.97	59	62
1	2130042	2135707	RLOC_00000702	6	-	5.9	4.6	0.77	0.905	261	252
1	2135809	2140981	RLOC_00000703	498	+	497.8	497.8	0.0108	0.117	58	39
1	2152810	2155755	RLOC_00000707	6	+	6.0	-2.7	0.148	0.419	167	166
1	2155115	2156119	RLOC_00000708	10	-	10.0	-4.1	0.408	0.677	45	42
1	2158399	2160805	RLOC_00000711	11	-	11.2	-9.0	0.00742	0.0945	75	43
1	2160900	2163369	RLOC_00000712	11	-	11.3	2.7	0.351	0.628	94	106
1	2168556	2172247	RLOC_00000716	116	+	115.7	-112.7	0.0468	0.251	496	389
1	2173043	2175031	RLOC_00000717	16	-	16.5	15.3	0.771	0.905	81	82
1	2178021	2184193	RLOC_00000719	58	-	58.1	-43.5	0.211	0.493	200	208
1	2191265	2193834	RLOC_00000724	17	-	17.0	-13.6	0.000723	0.0223	403	350
1	2199996	2201296	RLOC_00000727	9	+	9.1	-4.2	0.227	0.511	125	102
1	2204103	2207099	RLOC_00000729	6	+	5.7	5.6	0.189	0.467	383	330
1	2215203	2216989	RLOC_00000732	5	+	4.7	-4.0	0.453	0.712	105	93
1	2220180	2223018	RLOC_00000735	27	-	27.2	25.8	0.00528	0.0768	123	135
1	2225738	2227705	RLOC_00000737	5	+	5.1	2.9	0.73	0.885	113	112
1	2238016	2241471	RLOC_00000741	20	+	20.5	19.9	0.501	0.75	224	129
1	2245646	2248951	RLOC_00000744	34	-	34.2	30.1	0.579	0.798	155	148
1	2249100	2254036	RLOC_00000745	48	+	47.9	39.5	0.0013	0.0322	974	573
1	2257277	2260113	RLOC_00000747	8	-	8.1	-3.7	0.549	0.78	95	81
1	2260316	2262923	RLOC_00000748	3	-	2.8	-2.4	0.691	0.863	121	125
1	2276042	2280502	RLOC_00000752	69	+	69.3	-65.9	0.495	0.744	97	97
1	2286186	2289403	RLOC_00000754	111	-	110.9	-109.0	0.312	0.594	54	70
1	2291368	2294619	RLOC_00000756	13	+	12.9	-4.8	0.826	0.926	60	56
1	2296022	2299557	RLOC_00000761	9	-	8.6	5.9	0.746	0.892	49	63
1	2304434	2312399	RLOC_00000766	51	+	51.2	47.4	0.986	0.992	60	60
1	2313580	2316507	RLOC_00000768	2	-	2.2	-1.8	0.293	0.574	75	48
1	2331131	2333767	RLOC_00000773	9	-	9.3	4.1	0.555	0.783	49	60
1	2336476	2339391	RLOC_00000776	2	-	2.1	-1.7	0.101	0.36	7914	10964
1	2341446	2342148	RLOC_00000778	5	+	5.0	1.1	0.0607	0.288	316	559
1	2348801	2351904	RLOC_00000782	57	+	56.9	45.1	0.00139	0.0333	28	34
1	2352112	2356416	RLOC_00000783	107	-	106.6	102.4	0.0609	0.288	86	63
1	2359110	2366736	RLOC_00000784	515	-	514.7	514.7	0.0271	0.194	40	68
1	2368776	2369739	RLOC_00000786	5	+	5.3	-5.0	0.143	0.413	175	152
1	2370019	2374607	RLOC_00000787	31	-	30.6	30.6	0.0167	0.15	78	62
1	2379594	2381390	RLOC_00000790	21	+	21.5	-19.6	0.0895	0.34	176	197
1	2381588	2388169	RLOC_00000791	200	+	199.6	165.0	0.0451	0.246	40	34
1	2390530	2392628	RLOC_00000794	40	-	40.4	-37.8	0.0065	0.0869	79	78
1	2394984	2398826	RLOC_00000797	70	+	69.7	-67.1	0.0379	0.227	33	38
1	2403991	2406049	RLOC_00000800	7	-	7.0	-4.0	0.166	0.441	72	92
1	2407410	2409697	RLOC_00000802	4	-	4.5	4.5	0.00133	0.0325	1689	1468
1	2407471	2408135	RLOC_00000803	54	+	54.1	39.8	0.0527	0.266	302	89
1	2409864	2412777	RLOC_00000804	22	-	21.6	-7.6	0.0761	0.313	112	68
1	2412922	2413795	RLOC_00000805	7	+	6.7	-6.2	0.211	0.493	131	104
1	2416177	2420829	RLOC_00000808	59	+	58.5	58.2	0.502	0.751	83	73
1	2421088	2422066	RLOC_00000809	5	-	4.8	-4.8	0.0304	0.206	401	328
1	2422125	2423803	RLOC_00000810	10	+	10.2	10.0	0.28	0.562	86	54
1	2424053	2429225	RLOC_00000811	110	+	110.0	107.5	0.109	0.371	54	52
1	2437329	2439777	RLOC_00000814	5	+	5.2	3.5	0.08	0.32	1315	987
1	2442569	2457401	RLOC_00000815	62	+	61.9	-54.6	0.0394	0.231	3857	3304
1	2458183	2460817	RLOC_00000818	4	+	3.6	-0.1	0.156	0.43	2121	1783
1	2462948	2465545	RLOC_00000819	3	-	3.3	1.6	0.368	0.644	3801	3162
1	2465689	2467130	RLOC_00000820	10	-	10.1	6.0	0.224	0.507	68	75
1	2467144	2469316	RLOC_00000821	17	+	16.5	-0.6	0.111	0.373	116	80
1	2473164	2475128	RLOC_00000823	261	-	260.7	-260.3	0.729	0.885	45	43
1	2476952	2483810	RLOC_00000825	34	+	34.0	33.4	0.188	0.464	80	68
1	2489385	2493327	RLOC_00000829	53	-	53.3	-53.2	0.68	0.857	44	51
1	2495304	2498764	RLOC_00000831	7	-	7.2	-7.0	0.155	0.429	78	42
1	2535250	2537950	RLOC_00000840	8	+	8.1	7.7	0.35	0.627	475	369
1	2537993	2538227	RLOC_00000841	3	-	3.3	2.9	0.253	0.534	38	50
1	2539550	2542339	RLOC_00000844	10	-	9.9	6.5	0.702	0.869	36	35
1	2542662	2547946	RLOC_00000845	69	-	69.5	-45.3	0.55	0.78	64	45
1	2564089	2565230	RLOC_00000852	32	-	32.5	19.6	0.318	0.6	38	26
1	2567419	2573448	RLOC_00000853	39	+	38.9	29.4	0.223	0.506	136	136
1	2573626	2576782	RLOC_00000854	14	-	14.3	-12.4	0.0427	0.24	738	648
1	2576975	2580754	RLOC_00000855	102	-	102.3	96.2	0.194	0.473	48	42
1	2588775	2590609	RLOC_00000859	8	-	8.2	-5.7	0.224	0.507	64	55
1	2620319	2621667	RLOC_00000865	11	-	11.5	-10.3	0.325	0.607	33	40
1	2635938	2638025	RLOC_00000870	5	+	4.6	-3.5	0.00107	0.029	1301	1067
1	2638036	2640663	RLOC_00000871	10	+	10.3	10.3	0.0104	0.115	91	77
1	2640741	2641898	RLOC_00000872	2	-	2.4	1.7	0.088	0.337	18071	12165
1	2646166	2657120	RLOC_00000875	768	+	768.1	723.3	0.133	0.401	113	111
1	2667797	2671957	RLOC_00000878	7	-	6.6	0.6	0.394	0.664	132	107
1	2672197	2674721	RLOC_00000879	20	+	19.9	18.2	0.638	0.834	69	59
1	2675777	2679875	RLOC_00000880	17	+	17.4	15.4	0.898	0.954	94	75
1	2681959	2684097	RLOC_00000881	28	-	28.3	20.8	0.96	0.98	48	32
1	2684173	2686150	RLOC_00000882	13	+	13.1	6.0	0.00605	0.0835	276	214
1	2685658	2688658	RLOC_00000883	20	-	19.8	19.2	0.00801	0.0997	132	79
1	2691053	2694685	RLOC_00000885	64	-	63.8	-63.7	0.188	0.464	271	231
1	2696380	2703217	RLOC_00000886	85	+	84.7	-84.5	0.0814	0.323	417	340
1	2703339	2709550	RLOC_00000887	172	+	171.8	-167.8	0.137	0.408	316	239
1	2709550	2711046	RLOC_00000888	18	-	17.9	17.9	0.437	0.701	44	39
1	2712683	2714842	RLOC_00000889	9	+	8.6	-8.1	0.0334	0.214	370	347
1	2714993	2716532	RLOC_00000890	12	-	12.3	11.7	0.0193	0.162	169	94
1	2736689	2743947	RLOC_00000896	399	+	398.8	-355.3	0.0547	0.271	37	34
1	2742918	2751278	RLOC_00000897	118	-	118.1	94.9	0.331	0.612	318	221
1	2752123	2753809	RLOC_00000899	18	+	18.2	-8.6	0.159	0.433	40	78
1	2756887	2759889	RLOC_00000900	13	-	12.8	-5.8	0.368	0.643	69	53
1	2762583	2769002	RLOC_00000902	10	+	10.1	5.4	0.33	0.611	60	77
1	2768964	2771465	RLOC_00000903	40	-	39.7	32.4	0.000266	0.0114	78	82
1	2773940	2779319	RLOC_00000905	7	+	6.7	-0.1	0.724	0.882	23	51
1	2808520	2811227	RLOC_00000911	27	-	26.9	16.9	0.36	0.636	109	84
1	2808759	2809775	RLOC_00000912	3	+	2.9	2.3	0.77	0.905	91	74
1	2812817	2818071	RLOC_00000914	153	-	152.7	148.7	0.25	0.532	32	30
1	2821353	2825487	RLOC_00000916	8	-	8.2	-3.4	0.931	0.968	102	95
1	2827058	2829378	RLOC_00000918	7	+	7.4	6.5	0.188	0.465	300	323
1	2846893	2848100	RLOC_00000923	1	-	1.5	0.0	0.894	0.952	362	340
1	2848148	2852270	RLOC_00000924	117	+	116.8	114.3	0.231	0.514	61	45
1	2852362	2855941	RLOC_00000925	8	+	8.1	1.9	0.651	0.841	72	60
1	2873299	2877261	RLOC_00000931	14	+	14.5	-11.4	0.805	0.918	188	286
1	2882434	2886635	RLOC_00000935	151	+	151.0	-142.3	0.162	0.437	272	212
1	2895164	2899446	RLOC_00000939	64	-	63.9	63.8	0.0155	0.145	90	94
1	2899775	2904862	RLOC_00000940	82	-	81.7	79.8	0.0966	0.353	90	80
1	2921063	2925900	RLOC_00000944	39	-	38.5	-35.8	0.298	0.579	56	49
1	2927501	2929107	RLOC_00000945	5	+	4.7	-4.5	0.524	0.764	508	298
1	2936474	2939481	RLOC_00000948	6	-	5.8	-4.0	0.729	0.885	49	62
1	2939553	2945964	RLOC_00000950	163	-	163.2	-157.3	0.0349	0.218	730	609
1	2946029	2949159	RLOC_00000951	31	+	31.3	-5.5	0.00248	0.048	166	132
1	2951533	2955693	RLOC_00000953	74	-	73.7	48.5	0.0621	0.29	92	80
1	2964039	2972472	RLOC_00000956	107	-	106.8	-47.5	0.234	0.518	350	285
1	2972637	2977002	RLOC_00000959	8	-	7.9	4.9	0.205	0.486	318	284
1	2977767	2982713	RLOC_00000961	65	-	64.8	-55.9	0.568	0.791	39	41
1	2989119	2990418	RLOC_00000967	7	+	6.6	0.9	0.467	0.722	164	197
1	2994216	2998232	RLOC_00000969	15	+	14.8	14.8	0.725	0.883	196	176
1	2997454	3001314	RLOC_00000970	6	-	6.3	-3.5	0.75	0.895	42	30
1	3008896	3009954	RLOC_00000974	2	+	1.8	-0.4	0.0195	0.163	5115	2899
1	3009986	3015297	RLOC_00000975	60	-	59.8	-54.4	0.485	0.737	138	159
1	3015236	3018712	RLOC_00000976	9	+	8.6	6.9	0.000368	0.0143	2089	1601
1	3037714	3041873	RLOC_00000985	79	-	78.8	-78.0	0.11	0.371	63	47
1	3041995	3045541	RLOC_00000986	3	+	3.1	-0.7	0.888	0.95	199	176
1	3063935	3065999	RLOC_00000993	5	+	4.8	3.1	0.952	0.976	127	100
1	3066673	3068796	RLOC_00000994	13	+	13.3	-12.1	0.103	0.362	67	77
1	3070855	3072273	RLOC_00000996	120	-	119.8	119.4	0.194	0.473	83	59
1	3093643	3094954	RLOC_00001001	4	+	3.7	-2.1	0.444	0.706	141	403
1	3095159	3100828	RLOC_00001002	20	-	19.5	-13.8	0.2	0.48	553	431
1	3104491	3107801	RLOC_00001004	17	+	17.4	-15.3	0.249	0.532	845	675
1	3111896	3116692	RLOC_00001007	24	-	23.7	-22.2	0.156	0.43	277	191
1	3118154	3119815	RLOC_00001009	9	-	8.9	7.7	0.277	0.559	79	58
1	3119738	3122585	RLOC_00001010	27	+	26.9	-23.4	0.603	0.814	807	646
1	3122925	3124741	RLOC_00001011	8	+	8.2	6.1	0.242	0.525	114	118
1	3127744	3131082	RLOC_00001014	7	-	6.9	-6.4	0.636	0.833	72	45
1	3136187	3140353	RLOC_00001018	3	-	2.9	-1.5	0.826	0.926	1791	1405
1	3147636	3154404	RLOC_00001021	82	-	82.2	51.3	0.44	0.702	46	53
1	3154414	3156376	RLOC_00001022	8	+	7.9	7.7	0.0561	0.275	54	87
1	3157260	3161698	RLOC_00001023	138	-	137.9	132.9	0.0194	0.162	146	83
1	3157463	3159243	RLOC_00001024	11	+	10.9	10.9	0.00679	0.0885	232	162
1	3161831	3165616	RLOC_00001025	24	+	23.9	23.8	0.0637	0.293	247	157
1	3165310	3167899	RLOC_00001026	2	-	2.3	0.1	0.769	0.904	186	212
1	3172083	3176965	RLOC_00001028	329	+	328.8	-327.6	0.0147	0.14	170	123
1	3176825	3180734	RLOC_00001030	42	-	41.5	-41.3	0.151	0.424	571	412
1	3189300	3190242	RLOC_00001033	2	+	2.5	-0.7	0.223	0.506	113	82
1	3192567	3195044	RLOC_00001035	7	-	7.0	5.6	0.692	0.864	70	58
1	3195718	3200403	RLOC_00001036	65	-	64.8	-60.7	0.285	0.566	79	74
1	3201684	3204150	RLOC_00001037	5	+	5.1	-1.8	0.804	0.918	53	57
1	3205578	3209447	RLOC_00001041	97	+	96.9	89.5	0.0148	0.141	74	57
1	3217977	3220136	RLOC_00001045	6	+	6.4	4.1	0.147	0.419	67	59
1	3218578	3227109	RLOC_00001046	329	-	328.8	305.6	0.158	0.433	123	120
1	3252097	3255782	RLOC_00001055	17	+	17.0	2.5	0.0526	0.266	168	162
1	3256188	3261741	RLOC_00001056	120	-	120.2	-81.0	0.13	0.397	56	57
1	3262221	3264976	RLOC_00001057	166	-	166.0	164.3	0.189	0.466	31	31
1	3269538	3272110	RLOC_00001059	20	-	19.9	-9.8	0.0393	0.231	58	41
1	3288086	3290497	RLOC_00001064	50	+	50.3	37.0	0.000748	0.0227	75	52
1	3290161	3296200	RLOC_00001065	183	-	182.8	-154.8	0.241	0.524	44	43
1	3322553	3323735	RLOC_00001074	10	-	9.7	-8.9	0.375	0.649	131	86
1	3325831	3327697	RLOC_00001075	6	+	5.9	4.6	0.601	0.813	155	67
1	3333491	3341629	RLOC_00001078	82	-	82.1	55.6	0.815	0.922	124	94
1	3346382	3348139	RLOC_00001080	4	-	3.7	-1.5	0.289	0.571	215	229
1	3355580	3356453	RLOC_00001084	11	+	10.9	-9.5	0.26	0.543	50	37
1	3370401	3377469	RLOC_00001091	13	+	13.2	8.8	0.652	0.841	125	105
1	3381377	3388378	RLOC_00001093	76	-	76.2	-36.1	0.511	0.756	104	82
1	3392767	3395089	RLOC_00001096	108	-	107.7	105.8	0.00404	0.065	38	37
1	3395495	3398577	RLOC_00001097	93	-	92.6	91.8	0.0624	0.291	569	416
1	3406951	3412897	RLOC_00001101	5	-	5.3	0.0	0.103	0.363	122	116
1	3414822	3419691	RLOC_00001103	40	-	39.7	38.7	0.421	0.686	50	55
1	3428431	3430640	RLOC_00001108	23	-	22.8	-9.1	0.469	0.724	70	75
1	3441987	3444375	RLOC_00001113	18	-	18.0	16.5	0.000874	0.0258	123	221
1	3459953	3461513	RLOC_00001116	2	-	2.2	1.3	0.823	0.925	453	340
1	3461514	3465753	RLOC_00001117	186	+	185.6	-185.6	0.0239	0.18	114	85
1	3469579	3471741	RLOC_00001119	30	+	29.9	29.1	0.738	0.888	198	167
1	3487572	3491488	RLOC_00001127	96	+	95.7	95.2	0.882	0.948	35	32
1	3491257	3495244	RLOC_00001128	275	-	275.0	275.0	0.107	0.368	64	57
1	3501987	3503544	RLOC_00001131	5	-	4.8	-0.0	0.515	0.759	469	406
1	3503610	3509027	RLOC_00001132	1836	+	1836.4	1836.4	0.000362	0.0142	84	32
1	3512738	3514824	RLOC_00001134	11	-	10.7	10.7	0.0111	0.119	299	230
1	3523953	3526531	RLOC_00001137	8	-	7.7	-0.1	0.832	0.929	46	39
1	3532228	3535139	RLOC_00001140	60	+	59.7	-53.1	0.143	0.413	82	75
1	3535326	3538371	RLOC_00001141	4	+	3.8	0.9	0.174	0.45	476	387
1	3544912	3545614	RLOC_00001143	10	-	10.3	-10.3	9.56e-05	0.0053	440	398
1	3554103	3556645	RLOC_00001145	10	+	10.3	6.3	0.564	0.788	52	44
1	3562828	3564850	RLOC_00001150	32	+	31.9	-29.1	0.245	0.528	55	52
1	3567904	3571062	RLOC_00001152	9	-	9.3	-6.2	0.0948	0.349	92	103
1	3580829	3590928	RLOC_00001157	28	-	28.0	9.5	0.955	0.978	156	112
1	3599033	3605076	RLOC_00001162	423	-	423.4	374.1	0.0236	0.179	45	46
1	3605511	3607595	RLOC_00001164	184	-	183.6	174.1	0.132	0.399	121	85
1	3607630	3610616	RLOC_00001165	2	-	1.6	0.4	0.948	0.975	346	297
1	3611544	3614826	RLOC_00001167	9	+	9.1	2.1	0.679	0.857	56	34
1	3614507	3616308	RLOC_00001168	2	-	1.9	-0.4	0.944	0.972	147	128
1	3627658	3630836	RLOC_00001173	108	+	107.6	100.5	0.388	0.659	52	62
1	3632131	3637250	RLOC_00001174	10	-	10.4	-10.0	0.0509	0.262	83	77
1	3639834	3644187	RLOC_00001175	10	+	10.1	7.7	0.239	0.523	81	58
1	3644179	3658612	RLOC_00001176	530	-	529.6	510.9	0.227	0.511	206	142
1	3659203	3665162	RLOC_00001177	71	+	70.8	-70.8	0.00181	0.039	1655	1129
1	3676606	3678578	RLOC_00001182	38	+	38.2	31.1	0.817	0.922	52	42
1	3744834	3748557	RLOC_00001201	486	+	486.1	485.8	0.0476	0.253	71	99
1	3753297	3755916	RLOC_00001204	8	+	8.0	-7.6	0.164	0.438	45	51
1	3755593	3756988	RLOC_00001205	11	-	10.9	-7.6	0.451	0.71	71	47
1	3766753	3769799	RLOC_00001208	5	-	4.7	4.0	0.957	0.978	78	64
1	3777235	3780823	RLOC_00001212	6	+	6.3	0.8	0.353	0.629	895	878
1	3787262	3790905	RLOC_00001215	11	-	10.6	5.8	0.573	0.794	72	60
1	3800499	3804266	RLOC_00001219	4	-	3.9	2.0	0.985	0.992	132	130
1	3813871	3823088	RLOC_00001223	71	-	70.7	-68.4	0.964	0.982	168	106
1	3834406	3838304	RLOC_00001227	45	-	45.1	43.9	0.638	0.834	33	27
1	3837693	3844474	RLOC_00001228	197	+	196.6	-196.4	0.39	0.661	129	123
1	3847214	3850811	RLOC_00001231	11	+	11.4	-8.2	0.811	0.92	621	403
1	3862407	3864152	RLOC_00001235	3	+	3.4	-1.4	0.465	0.721	344	240
1	3864042	3867000	RLOC_00001236	10	-	10.5	9.8	0.514	0.758	100	110
1	3874394	3875530	RLOC_00001242	3	+	2.6	0.3	0.533	0.769	169	173
1	3878494	3880391	RLOC_00001245	7	-	7.3	7.3	0.234	0.518	56	74
1	3888609	3890824	RLOC_00001250	5	+	4.6	2.1	0.664	0.85	53	107
1	3895101	3897028	RLOC_00001253	16	-	16.1	-8.7	0.321	0.602	39	34
1	3901949	3903895	RLOC_00001257	16	+	16.3	16.2	0.183	0.459	44	34
1	3914631	3918243	RLOC_00001263	44	+	44.0	18.1	0.00762	0.0961	660	540
1	3920477	3924573	RLOC_00001265	10	+	9.7	9.5	0.247	0.53	47	48
1	3928114	3931701	RLOC_00001266	39	-	39.1	36.3	0.471	0.725	41	33
1	3938421	3940871	RLOC_00001268	6	+	6.2	-5.2	0.483	0.735	268	232
1	3945583	3946757	RLOC_00001272	17	+	16.9	-9.8	0.285	0.566	71	41
1	3948713	3957063	RLOC_00001273	297	+	297.3	-251.3	0.183	0.459	76	65
1	3967475	3969877	RLOC_00001279	8	+	7.9	-6.1	0.0608	0.288	375	305
1	3969653	3971890	RLOC_00001281	4	-	4.0	-1.3	0.27	0.553	41	36
1	3981152	3985224	RLOC_00001287	15	+	14.7	8.2	0.9	0.955	41	34
1	3990994	3993707	RLOC_00001292	5	-	5.1	-1.5	0.781	0.91	168	107
1	3995157	3997965	RLOC_00001294	5	+	5.4	-5.1	0.0789	0.319	608	622
1	3999198	4000118	RLOC_00001295	15	+	15.0	14.7	0.266	0.549	133	81
1	4001112	4006792	RLOC_00001296	31	+	31.4	-21.8	0.222	0.505	1874	1699
1	4010726	4013151	RLOC_00001299	6	+	6.0	1.1	0.416	0.683	119	126
1	4014781	4016544	RLOC_00001303	17	+	16.9	7.2	0.136	0.405	41	47
1	4016711	4021043	RLOC_00001304	3	-	3.4	2.7	0.518	0.761	1264	1129
1	4028594	4030656	RLOC_00001308	51	+	51.2	36.8	0.154	0.428	129	92
1	4049826	4053862	RLOC_00001315	12	-	12.1	12.0	0.062	0.29	184	173
1	4061362	4063549	RLOC_00001318	198	-	198.0	197.6	0.104	0.363	34	31
1	4072754	4077330	RLOC_00001322	19	+	18.6	-17.2	0.756	0.897	124	116
1	4084161	4085185	RLOC_00001325	7	+	7.3	6.7	0.181	0.457	148	112
1	4089578	4090874	RLOC_00001326	6	-	5.6	-5.1	8.01e-07	0.000163	6022	3481
1	4105215	4109601	RLOC_00001328	24	+	24.1	23.8	0.347	0.626	125	193
1	4114673	4117614	RLOC_00001329	4	-	3.6	-3.2	0.548	0.779	130	106
1	4121368	4125120	RLOC_00001331	110	+	109.7	-94.2	0.118	0.384	59	54
1	4144256	4151069	RLOC_00001341	37	+	37.2	-35.1	0.45	0.71	306	298
1	4153556	4161529	RLOC_00001342	265	+	265.5	260.7	0.0258	0.188	625	467
1	4171993	4174830	RLOC_00001345	16	+	15.8	15.0	0.325	0.607	114	66
1	4186652	4188233	RLOC_00001349	5	-	4.9	-2.3	0.72	0.879	268	255
1	4194419	4196847	RLOC_00001352	6	+	5.7	2.4	0.956	0.978	50	45
1	4198365	4206486	RLOC_00001354	27	+	27.4	-10.1	0.972	0.986	117	124
1	4220118	4222897	RLOC_00001357	104	+	103.5	-92.9	0.185	0.461	80	99
1	4223029	4225254	RLOC_00001358	5	+	5.2	4.0	0.627	0.827	445	396
1	4241420	4243229	RLOC_00001362	2	-	1.6	1.1	0.526	0.765	469	455
1	4247203	4250752	RLOC_00001364	40	+	39.8	39.8	0.00117	0.0304	35	37
1	4250944	4257457	RLOC_00001365	10	+	10.0	-3.1	0.376	0.649	56	60
1	4262952	4265060	RLOC_00001370	31	-	30.6	-23.1	0.03	0.205	115	98
1	4266617	4270907	RLOC_00001371	212	-	212.2	210.5	0.0443	0.244	126	148
1	4282793	4285876	RLOC_00001376	5	+	5.5	-3.0	0.509	0.755	70	67
1	4303254	4306101	RLOC_00001384	65	-	65.4	58.4	0.261	0.544	67	84
1	4305790	4308023	RLOC_00001385	20	+	19.8	-15.8	0.0743	0.309	85	78
1	4319864	4323265	RLOC_00001393	156	-	155.5	-154.6	0.0238	0.18	52	38
1	4344940	4348390	RLOC_00001401	421	-	420.6	418.9	0.0325	0.211	36	41
1	4348497	4355993	RLOC_00001402	197	+	197.5	179.6	0.217	0.499	257	209
1	4353638	4361270	RLOC_00001403	111	-	110.6	107.6	0.0412	0.236	288	248
1	4361508	4365398	RLOC_00001404	5	-	4.8	-1.3	0.667	0.851	328	298
1	4367255	4368844	RLOC_00001406	5	+	5.0	4.4	0.376	0.649	138	120
1	4368705	4371474	RLOC_00001408	36	-	36.0	-33.4	0.162	0.437	127	64
1	4374154	4375203	RLOC_00001410	21	-	20.9	-7.1	0.132	0.4	66	40
1	4374204	4378514	RLOC_00001411	10	+	10.2	-7.8	0.657	0.844	420	336
1	4378831	4379607	RLOC_00001412	9	-	9.1	-4.2	0.239	0.523	98	42
1	4379693	4381764	RLOC_00001413	9	-	9.0	-2.8	0.761	0.901	127	108
1	4384327	4387133	RLOC_00001415	5	+	4.8	-1.7	0.734	0.887	127	63
1	4392410	4394455	RLOC_00001419	1	-	1.1	0.8	0.514	0.758	3976	3454
1	4394730	4398198	RLOC_00001420	112	-	112.3	-111.3	0.0317	0.209	387	331
1	4436088	4439639	RLOC_00001429	11	-	11.4	-8.7	0.44	0.702	41	51
1	4440403	4443954	RLOC_00001431	43	-	42.6	41.5	0.0959	0.352	54	53
1	4452189	4454900	RLOC_00001434	4	+	4.4	-3.8	0.464	0.72	303	305
1	4459001	4460996	RLOC_00001437	6	+	6.3	-0.5	0.9	0.955	87	50
1	4461737	4463589	RLOC_00001438	9	+	8.9	-5.7	0.364	0.64	106	64
1	4467078	4469069	RLOC_00001441	4	+	4.0	1.3	0.44	0.702	194	120
1	4484586	4488587	RLOC_00001448	2	+	2.4	0.8	0.902	0.955	59	48
1	4498788	4501694	RLOC_00001451	27	+	26.6	-16.5	0.884	0.949	175	135
1	4525224	4526197	RLOC_00001458	4	-	3.7	-2.6	0.00822	0.101	1958	881
1	4528333	4530110	RLOC_00001461	15	-	15.1	11.6	0.178	0.453	111	30
1	4542167	4543970	RLOC_00001463	16	+	15.5	-10.4	0.201	0.481	370	53
1	4544955	4549164	RLOC_00001464	40	+	40.0	36.7	0.752	0.895	213	142
1	4563427	4567849	RLOC_00001468	40	-	40.5	-22.8	0.0233	0.178	151	119
1	4572279	4576711	RLOC_00001471	18	-	17.7	-17.0	0.214	0.496	40	36
1	4576872	4578369	RLOC_00001472	5	-	4.9	3.2	0.755	0.897	192	184
1	4588993	4590501	RLOC_00001475	4	-	4.3	4.2	0.666	0.85	140	130
1	4592303	4594468	RLOC_00001476	6	-	5.6	2.1	0.788	0.913	87	97
1	4608076	4610878	RLOC_00001481	5	-	5.4	2.1	0.728	0.884	3095	2945
1	4612649	4615219	RLOC_00001484	39	-	39.3	-38.6	0.08	0.32	68	67
1	4615767	4618548	RLOC_00001485	28	+	28.2	23.0	0.905	0.956	57	47
1	4636983	4644422	RLOC_00001497	194	-	194.2	-174.9	0.152	0.425	271	194
1	4658461	4663502	RLOC_00001501	65	-	65.5	64.1	0.525	0.764	74	135
1	4676947	4679808	RLOC_00001510	32	-	32.0	-23.0	0.959	0.979	66	77
1	4680289	4682382	RLOC_00001511	36	-	36.2	-30.5	0.238	0.523	121	49
1	4688017	4689265	RLOC_00001513	14	+	13.7	12.3	0.254	0.535	59	46
1	4693298	4695309	RLOC_00001515	3	+	2.8	-1.2	0.992	0.995	114	63
1	4709756	4712672	RLOC_00001520	11	+	10.8	-10.4	0.123	0.389	74	59
1	4735557	4738008	RLOC_00001531	28	+	28.4	9.3	0.0498	0.259	178	146
1	4748872	4751262	RLOC_00001538	13	+	12.7	-12.6	0.0589	0.284	52	46
1	4753092	4755659	RLOC_00001540	38	-	37.6	12.6	0.238	0.523	60	68
1	4760952	4762666	RLOC_00001544	4	+	3.7	-0.9	0.000439	0.0161	3118	1550
1	4761935	4766848	RLOC_00001545	6	-	6.3	-1.0	0.626	0.827	52	43
1	4773433	4774980	RLOC_00001547	11	+	11.3	10.4	0.279	0.561	46	40
1	4776282	4779420	RLOC_00001548	12	+	11.6	2.0	0.57	0.792	66	52
1	4788478	4796633	RLOC_00001550	182	+	181.6	-181.5	0.182	0.458	183	141
1	4797244	4800306	RLOC_00001551	16	+	16.3	-16.3	0.00128	0.032	140	130
1	4800145	4801859	RLOC_00001552	15	-	14.6	7.7	0.648	0.838	80	50
1	4802678	4805373	RLOC_00001554	8	+	7.8	-4.8	0.891	0.95	34	39
1	4805251	4807510	RLOC_00001555	5	-	4.6	0.7	0.902	0.955	105	56
1	4833395	4835118	RLOC_00001567	9	-	8.8	-0.2	0.686	0.86	50	84
1	4839215	4840795	RLOC_00001570	5	+	4.8	4.6	0.0458	0.248	250	254
1	4842287	4843092	RLOC_00001572	4	+	4.5	4.2	0.131	0.399	216	162
1	4856474	4858017	RLOC_00001579	43	-	43.0	43.0	0.00822	0.101	79	54
1	4868375	4871651	RLOC_00001583	13	+	12.5	-11.1	0.154	0.428	128	112
1	4874862	4877256	RLOC_00001585	12	-	11.9	-10.6	0.045	0.246	155	112
1	4877451	4879483	RLOC_00001586	5	+	4.8	-3.8	0.338	0.618	341	283
1	4880029	4882265	RLOC_00001587	14	-	14.3	-7.5	0.523	0.763	85	91
1	4884951	4886814	RLOC_00001589	4	+	4.0	-3.7	0.827	0.926	56	44
1	4888146	4891663	RLOC_00001591	2	+	1.9	1.1	0.356	0.633	2325	1846
1	4897306	4900131	RLOC_00001593	90	+	89.6	-42.3	0.00644	0.0868	364	348
1	4911092	4913167	RLOC_00001597	6	-	5.7	3.0	0.661	0.847	61	47
1	4917330	4921638	RLOC_00001600	16	-	16.1	13.8	0.101	0.36	102	80
1	4926485	4928812	RLOC_00001603	6	-	5.5	3.0	0.0199	0.164	584	547
1	4928930	4931111	RLOC_00001604	54	-	54.2	50.8	0.115	0.377	73	41
1	4938753	4941332	RLOC_00001607	52	-	51.6	-15.6	0.149	0.421	66	33
1	4946217	4947670	RLOC_00001608	6	-	5.7	0.4	0.496	0.745	389	363
1	4948637	4953284	RLOC_00001611	9	-	8.7	-5.2	0.44	0.702	35	34
1	4961593	4964515	RLOC_00001616	5	-	5.0	1.5	0.809	0.92	159	163
1	4980623	4983367	RLOC_00001622	3	+	3.4	3.1	0.777	0.909	36	43
1	4983530	4987420	RLOC_00001623	4	+	4.3	0.6	0.827	0.927	158	136
1	4989539	4992805	RLOC_00001624	15	+	15.3	-12.2	0.666	0.85	171	122
1	5008139	5014529	RLOC_00001630	23	-	22.5	-20.5	0.211	0.493	169	130
1	5014674	5016708	RLOC_00001631	9	-	9.0	9.0	0.0281	0.197	72	53
1	5023449	5031908	RLOC_00001633	159	+	159.3	131.7	0.211	0.493	95	104
1	5037575	5040597	RLOC_00001636	31	+	30.8	28.2	0.141	0.412	244	252
1	5042323	5045618	RLOC_00001638	37	+	36.6	15.6	0.208	0.489	121	94
1	5051587	5055278	RLOC_00001644	13	-	12.5	1.8	0.429	0.694	63	56
1	5058582	5061309	RLOC_00001645	14	+	13.6	10.6	0.0142	0.138	141	124
1	5061693	5065303	RLOC_00001646	18	-	17.7	16.5	0.0181	0.156	127	86
1	5066524	5068677	RLOC_00001647	6	-	6.3	6.3	0.193	0.473	157	128
1	5075178	5077981	RLOC_00001649	17	-	16.7	-12.0	0.0402	0.234	99	90
1	5102369	5104891	RLOC_00001657	9	-	9.3	-6.5	0.0604	0.287	240	158
1	5104974	5107107	RLOC_00001659	7	-	7.1	5.0	0.212	0.493	43	40
1	5107396	5115640	RLOC_00001660	361	-	361.0	360.9	0.0757	0.313	267	201
1	5116522	5123559	RLOC_00001661	15	-	15.5	-13.4	0.607	0.817	41	36
1	5128343	5129731	RLOC_00001663	10	-	10.5	0.6	0.373	0.647	38	145
1	5136873	5137982	RLOC_00001666	4	+	3.6	-2.7	0.728	0.884	163	133
1	5138081	5139582	RLOC_00001667	8	-	7.5	-5.3	0.115	0.379	215	162
1	5139711	5143735	RLOC_00001668	10	-	9.6	-4.3	0.936	0.97	112	97
1	5148936	5151427	RLOC_00001671	7	+	6.6	5.3	0.614	0.82	326	297
1	5165488	5168336	RLOC_00001677	52	-	51.7	-45.1	0.0483	0.254	673	442
1	5171119	5176429	RLOC_00001680	294	-	293.8	273.1	0.0191	0.161	44	47
1	5177509	5183687	RLOC_00001683	248	+	248.4	247.7	0.0105	0.115	77	65
1	5181990	5186996	RLOC_00001686	130	-	129.8	-129.8	0.176	0.451	93	84
1	5193283	5194214	RLOC_00001690	7	-	7.3	-1.2	0.371	0.645	46	59
1	5202592	5205964	RLOC_00001692	15	+	15.0	11.2	0.314	0.596	557	501
1	5205942	5209931	RLOC_00001693	10	-	10.4	8.6	0.241	0.525	103	110
1	5210158	5212455	RLOC_00001694	8	-	8.1	-1.2	0.539	0.773	182	191
1	5224293	5226778	RLOC_00001700	8	+	7.9	-6.5	0.621	0.824	119	125
1	5228191	5231184	RLOC_00001703	27	-	26.5	13.3	0.159	0.433	111	84
1	5242072	5243262	RLOC_00001707	39	-	38.9	36.2	0.0378	0.227	109	77
1	5243382	5248737	RLOC_00001708	398	+	397.7	-397.6	0.027	0.194	50	49
1	5248663	5252121	RLOC_00001709	96	-	95.7	-89.2	0.018	0.156	1068	837
1	5249759	5250573	RLOC_00001710	12	+	12.2	7.5	0.248	0.531	206	94
1	5252284	5256863	RLOC_00001711	30	+	29.5	23.6	0.352	0.629	89	101
1	5256673	5265100	RLOC_00001712	68	-	68.2	41.5	0.253	0.534	144	104
1	5275615	5277869	RLOC_00001717	8	-	7.8	-6.9	0.00214	0.0438	463	334
1	5278021	5279988	RLOC_00001718	11	-	10.6	10.5	0.622	0.824	78	102
1	5286882	5288667	RLOC_00001720	18	+	18.2	3.4	0.00343	0.0596	183	158
1	5290581	5292582	RLOC_00001721	9	+	9.4	9.4	0.163	0.437	58	103
1	5294365	5297075	RLOC_00001723	128	-	128.3	127.4	0.000183	0.00837	214	184
1	5294449	5296068	RLOC_00001724	7	+	7.4	5.7	0.251	0.533	119	77
1	5297846	5298571	RLOC_00001725	26	-	25.9	-22.2	0.00448	0.07	61	41
1	5297911	5300939	RLOC_00001726	41	+	41.1	-12.6	0.621	0.824	70	49
1	5300732	5303522	RLOC_00001727	24	-	23.7	20.6	0.888	0.95	71	41
1	5306026	5309558	RLOC_00001729	6	-	6.3	-3.3	0.874	0.946	43	31
1	5325317	5328891	RLOC_00001735	1	+	1.3	1.2	0.892	0.951	459	406
1	5389951	5391672	RLOC_00001756	10	+	10.0	0.5	0.694	0.864	82	58
1	5398917	5403853	RLOC_00001759	27	+	26.6	-3.0	0.36	0.636	1097	743
1	5404129	5405910	RLOC_00001761	11	+	11.3	5.1	0.75	0.895	63	47
1	5406133	5410035	RLOC_00001763	37	-	37.1	37.1	0.0611	0.288	158	114
1	5410783	5414985	RLOC_00001765	15	+	14.7	-7.1	0.343	0.623	165	184
1	5414359	5421045	RLOC_00001766	10	-	9.8	-9.5	0.416	0.683	198	216
1	5430035	5436618	RLOC_00001772	11	-	11.1	-6.9	0.357	0.633	73	58
1	5444219	5446564	RLOC_00001775	12	+	12.1	-11.1	0.466	0.721	63	59
1	5446442	5447878	RLOC_00001777	5	-	4.8	4.7	7.42e-07	0.000161	16328	11085
1	5454765	5457022	RLOC_00001784	6	+	5.7	-1.8	0.946	0.973	118	126
1	5458395	5461124	RLOC_00001786	9	-	8.6	1.2	0.899	0.954	112	106
1	5460489	5464252	RLOC_00001787	421	+	421.4	405.5	0.0512	0.263	34	31
1	5465338	5471149	RLOC_00001789	24	+	23.9	-17.5	0.955	0.978	95	95
1	5471315	5473293	RLOC_00001790	2	+	2.2	2.0	0.598	0.811	1254	1088
1	5473358	5478405	RLOC_00001791	13	+	12.7	-6.6	0.485	0.737	58	40
1	5478702	5482648	RLOC_00001792	20	+	20.3	19.5	0.101	0.36	496	396
1	5486272	5489132	RLOC_00001794	7	-	6.8	2.1	0.955	0.978	41	38
1	5489214	5492148	RLOC_00001795	23	+	23.3	-9.7	3.81e-05	0.00263	652	490
1	5494526	5495435	RLOC_00001798	13	+	12.8	3.9	0.0258	0.189	72	61
1	5495008	5497833	RLOC_00001799	11	-	11.4	3.9	0.466	0.721	96	78
1	5498000	5501370	RLOC_00001800	7	+	6.6	3.1	0.811	0.92	46	32
1	5504607	5507059	RLOC_00001804	29	+	28.9	20.2	0.0805	0.321	37	31
1	5514281	5516162	RLOC_00001807	72	+	71.5	64.3	0.00565	0.0798	331	185
1	5538665	5540002	RLOC_00001816	12	-	11.7	-11.7	0.575	0.795	115	72
1	5540049	5542902	RLOC_00001817	4	+	4.0	-3.0	0.998	0.998	407	430
1	5543145	5546190	RLOC_00001818	7	+	6.8	1.2	0.835	0.93	46	50
1	5546098	5547753	RLOC_00001819	9	-	8.7	3.4	0.00604	0.0835	205	166
1	5554842	5556844	RLOC_00001824	8	-	7.6	-2.6	0.078	0.316	273	235
1	5562860	5568459	RLOC_00001827	169	+	169.2	168.5	0.228	0.512	45	32
1	5578264	5582210	RLOC_00001831	27	+	27.3	-25.9	0.276	0.559	324	261
1	5590755	5593098	RLOC_00001834	6	+	6.0	3.8	0.749	0.894	105	66
1	5608681	5612064	RLOC_00001840	16	+	16.2	-12.2	0.397	0.667	175	170
1	5619543	5622674	RLOC_00001846	37	-	36.7	-26.5	0.367	0.643	151	123
1	5622745	5625683	RLOC_00001847	10	+	10.3	2.0	0.131	0.399	195	185
1	5668386	5670730	RLOC_00001859	8	+	8.4	-4.6	0.765	0.903	112	103
1	5670547	5673648	RLOC_00001861	6	-	6.0	-3.1	0.693	0.864	33	32
1	5675494	5678873	RLOC_00001863	8	-	7.9	-7.4	0.268	0.551	174	131
1	5702116	5713752	RLOC_00001871	145	+	145.4	-120.8	0.65	0.84	245	215
1	5713793	5722614	RLOC_00001872	45	+	45.2	42.2	0.122	0.388	39	41
1	5722881	5729154	RLOC_00001873	202	+	202.0	-201.5	0.00642	0.0866	643	635
1	5726319	5727407	RLOC_00001875	11	-	10.9	3.9	0.202	0.482	89	87
1	5739230	5755483	RLOC_00001880	658	-	657.5	-348.7	0.627	0.827	33	38
1	5744334	5745259	RLOC_00001881	15	+	15.5	-10.2	0.116	0.38	42	36
1	5755587	5756924	RLOC_00001882	3	+	3.1	0.6	0.528	0.766	326	263
1	5757507	5760521	RLOC_00001884	20	+	19.6	-17.1	0.495	0.744	451	359
1	5762645	5764157	RLOC_00001886	7	-	7.0	4.4	0.975	0.987	171	144
1	5767279	5770656	RLOC_00001888	27	+	26.7	0.5	0.317	0.599	75	60
1	5770731	5773322	RLOC_00001889	54	-	53.5	-42.2	0.093	0.346	59	69
1	5773568	5777828	RLOC_00001890	11	+	11.4	8.8	0.0047	0.0728	830	820
1	5776176	5778542	RLOC_00001891	7	-	7.2	-4.8	0.461	0.718	466	367
1	5786481	5789262	RLOC_00001895	18	-	18.3	18.1	0.656	0.844	226	180
1	5828914	5831383	RLOC_00001909	10	+	10.4	4.7	0.161	0.436	180	150
1	5840185	5841719	RLOC_00001914	21	-	21.4	-19.1	0.836	0.93	250	260
1	5844483	5850934	RLOC_00001916	132	-	132.5	-41.8	0.134	0.402	65	61
1	5844562	5846527	RLOC_00001917	23	+	22.8	22.0	0.0633	0.292	212	123
1	5851846	5853991	RLOC_00001918	25	+	24.7	-24.4	0.0693	0.3	65	72
1	5854092	5857787	RLOC_00001919	15	+	14.7	6.2	0.173	0.449	111	83
1	5856526	5858573	RLOC_00001921	88	-	88.4	85.6	0.159	0.433	89	61
1	5860064	5862890	RLOC_00001923	8	-	8.4	0.2	0.813	0.92	55	34
1	5867534	5869436	RLOC_00001926	22	+	21.8	2.2	0.0768	0.314	71	51
1	5869542	5870883	RLOC_00001927	14	+	14.3	-9.4	0.324	0.606	51	56
1	5875294	5876620	RLOC_00001929	8	+	8.0	7.3	0.153	0.427	56	61
1	5878394	5880190	RLOC_00001930	5	+	4.9	4.2	0.0806	0.321	381	267
1	5879607	5884786	RLOC_00001931	49	-	48.8	43.9	0.0279	0.196	123	104
1	5885006	5890500	RLOC_00001932	16	+	16.1	14.8	0.403	0.673	505	544
1	5916827	5920342	RLOC_00001942	2	-	2.4	0.7	0.937	0.97	224	136
1	5922331	5926400	RLOC_00001944	10	+	10.4	9.9	0.00524	0.0767	338	303
1	5929814	5932005	RLOC_00001947	15	+	15.1	-1.2	0.796	0.916	35	35
1	5946447	5951657	RLOC_00001951	116	+	115.8	-77.6	0.512	0.757	72	72
1	5951541	5955143	RLOC_00001953	7	-	6.8	-0.6	0.399	0.669	264	196
1	5983936	5987934	RLOC_00001963	49	-	49.0	-49.0	3.03e-05	0.00223	73	56
1	6002895	6007420	RLOC_00001967	13	+	13.5	1.7	0.0311	0.209	211	144
1	6008436	6009420	RLOC_00001969	2	+	2.2	-1.0	0.939	0.971	81	67
1	6023464	6024331	RLOC_00001972	6	-	6.5	2.2	0.453	0.711	39	57
1	6024628	6027565	RLOC_00001973	125	-	125.3	89.6	0.201	0.481	41	40
1	6027430	6029115	RLOC_00001974	12	+	11.8	-11.6	0.0449	0.245	118	126
1	6034269	6037398	RLOC_00001977	37	+	37.3	-36.7	0.00848	0.102	119	89
1	6061894	6063362	RLOC_00001985	2	+	2.2	0.6	0.896	0.953	112	85
1	6069423	6072140	RLOC_00001988	8	-	8.1	1.7	0.894	0.952	73	39
1	6093153	6098445	RLOC_00001996	66	-	65.8	-3.0	0.632	0.83	81	112
1	6099038	6100397	RLOC_00001997	2	+	1.8	-1.6	0.93	0.968	133	131
1	6110034	6116609	RLOC_00002003	213	-	213.3	-201.1	0.282	0.564	39	33
1	6123556	6125339	RLOC_00002005	2	+	1.7	0.6	0.901	0.955	77	50
1	6129977	6131657	RLOC_00002008	2	+	2.4	-0.9	0.924	0.965	38	76
1	6142401	6146521	RLOC_00002013	16	+	16.5	3.6	0.802	0.918	319	243
1	6149177	6150038	RLOC_00002016	1	+	0.7	-0.0	0.972	0.986	102	271
1	6149304	6153999	RLOC_00002017	101	-	101.4	-100.9	0.00283	0.0523	1117	741
1	6154253	6155830	RLOC_00002019	2	-	2.1	-1.4	0.942	0.972	81	87
1	6184716	6187567	RLOC_00002028	53	+	53.3	-50.7	0.234	0.518	60	37
1	6187510	6196204	RLOC_00002029	1053	-	1053.2	1052.0	0.000568	0.0192	343	136
1	6199734	6207037	RLOC_00002030	900	+	899.8	898.1	8.7e-05	0.00499	305	120
1	6211831	6213591	RLOC_00002035	4	-	4.1	0.1	0.754	0.896	379	356
1	6213650	6218384	RLOC_00002036	5	-	5.0	0.5	0.394	0.664	250	219
1	6222200	6224242	RLOC_00002040	14	+	13.8	12.0	0.00539	0.0775	1447	930
1	6244297	6247830	RLOC_00002047	105	-	104.7	24.1	0.024	0.181	99	60
1	6248618	6257907	RLOC_00002048	100	+	99.5	19.1	0.436	0.7	188	174
1	6257694	6261445	RLOC_00002049	16	-	15.5	1.8	0.189	0.467	29	30
1	6265176	6268873	RLOC_00002053	925	-	925.0	925.0	3.57e-05	0.00256	134	102
1	6278783	6282144	RLOC_00002060	2	-	2.5	0.7	0.837	0.93	76	77
1	6282169	6293993	RLOC_00002061	278	-	278.3	-237.8	0.402	0.673	69	87
1	6305813	6313941	RLOC_00002067	935	-	935.0	-902.5	0.00265	0.0499	231	113
1	6316710	6324378	RLOC_00002069	154	-	154.1	-153.8	0.375	0.649	77	41
1	6331404	6333877	RLOC_00002072	10	+	9.5	-0.6	0.618	0.822	102	134
1	6343127	6347930	RLOC_00002075	17	+	16.7	-0.1	0.874	0.946	50	43
1	6348047	6352010	RLOC_00002076	8	+	7.8	1.3	0.43	0.695	121	99
1	6352329	6356261	RLOC_00002077	23	+	22.9	9.5	0.0397	0.233	111	124
1	6355694	6360344	RLOC_00002078	18	-	17.8	16.8	0.175	0.45	88	103
1	6361616	6366311	RLOC_00002079	344	+	344.0	-344.0	0.157	0.431	70	78
1	6366396	6368916	RLOC_00002080	23	+	22.9	-14.4	0.146	0.417	63	51
1	6368965	6373080	RLOC_00002081	14	+	14.4	9.2	0.981	0.989	203	156
1	6376638	6378580	RLOC_00002085	3	-	2.9	2.3	0.153	0.427	1004	795
1	6395768	6398274	RLOC_00002089	29	+	29.2	22.9	0.0328	0.212	45	55
1	6398530	6400029	RLOC_00002090	21	+	20.8	-20.2	0.0594	0.285	65	64
1	6400281	6402832	RLOC_00002091	8	+	7.5	6.9	0.671	0.851	67	47
1	6405607	6416514	RLOC_00002092	262	+	261.8	-161.1	0.188	0.465	259	197
1	6416178	6421188	RLOC_00002093	126	-	126.0	125.9	0.217	0.499	275	232
1	6419038	6425898	RLOC_00002094	142	+	142.5	-117.6	0.357	0.633	103	111
1	6426708	6431093	RLOC_00002095	88	-	87.7	-57.7	0.22	0.503	35	33
1	6431937	6433552	RLOC_00002096	6	-	5.7	0.2	0.499	0.748	41	33
1	6432929	6437236	RLOC_00002097	687	+	686.9	681.7	0.0157	0.146	46	41
1	6437476	6444238	RLOC_00002098	99	+	99.1	-79.7	0.359	0.635	73	70
1	6450603	6453469	RLOC_00002101	46	+	46.0	-42.2	0.725	0.882	159	38
1	6457774	6460405	RLOC_00002102	8	-	8.3	1.4	0.0707	0.303	235	247
1	6459211	6462367	RLOC_00002103	8	+	8.5	-4.3	0.142	0.413	518	366
1	6463806	6465566	RLOC_00002105	14	+	14.0	-13.2	0.251	0.532	55	61
1	6465463	6466483	RLOC_00002106	18	-	17.5	6.1	0.839	0.931	50	41
1	6474801	6477394	RLOC_00002110	49	+	49.0	33.6	0.859	0.94	34	37
1	6481046	6483599	RLOC_00002113	6	-	5.5	-3.9	0.926	0.966	148	87
1	6485512	6487152	RLOC_00002114	7	-	7.2	-4.2	0.34	0.621	76	47
1	6500752	6504567	RLOC_00002120	8	-	8.5	-7.7	0.112	0.373	98	61
1	6520761	6523904	RLOC_00002126	69	+	69.0	59.4	0.137	0.407	41	66
1	6522763	6526075	RLOC_00002127	11	-	10.6	-5.0	0.464	0.72	56	49
1	6546176	6552108	RLOC_00002133	19	+	18.5	18.5	0.0719	0.305	46	34
1	6558573	6562951	RLOC_00002138	17	-	17.3	4.6	0.357	0.633	832	620
1	6565509	6570951	RLOC_00002139	164	+	163.7	-56.8	0.525	0.764	63	54
1	6577424	6579321	RLOC_00002142	32	-	31.6	26.1	0.161	0.435	32	29
1	6602104	6606028	RLOC_00002148	28	+	27.9	-26.8	0.185	0.462	86	87
1	6608067	6609480	RLOC_00002150	7	+	7.3	7.2	0.0748	0.311	137	74
1	6609278	6613052	RLOC_00002152	123	-	123.1	-122.9	0.188	0.465	163	127
1	6612629	6613972	RLOC_00002154	11	+	11.1	2.6	0.000227	0.0101	661	411
1	6621776	6623620	RLOC_00002158	13	+	12.5	-2.0	0.503	0.751	113	52
1	6626793	6633133	RLOC_00002161	15	-	14.8	4.1	0.593	0.807	54	28
1	6649242	6650464	RLOC_00002165	19	-	19.3	-16.0	0.869	0.944	51	57
1	6676209	6677680	RLOC_00002173	4	-	4.4	0.4	0.878	0.947	74	72
1	6680396	6683559	RLOC_00002175	13	-	13.3	-12.8	0.185	0.461	69	31
1	6688531	6691216	RLOC_00002177	8	+	8.4	2.0	0.11	0.371	352	303
1	6689495	6692496	RLOC_00002178	11	-	11.1	6.7	0.1	0.359	93	82
1	6709772	6712437	RLOC_00002185	211	+	210.9	207.7	0.0485	0.255	46	47
1	6711958	6716439	RLOC_00002186	25	-	25.3	-24.9	0.739	0.889	365	205
1	6724380	6728078	RLOC_00002190	13	-	12.7	-8.6	0.0905	0.342	56	61
1	6728746	6730931	RLOC_00002191	6	+	6.0	-1.2	0.976	0.987	40	46
1	6731367	6734984	RLOC_00002192	41	-	40.9	-39.7	0.0285	0.197	127	96
1	6759894	6762906	RLOC_00002200	12	+	11.5	-6.2	0.746	0.892	62	40
1	6773248	6774611	RLOC_00002206	37	-	37.1	-36.3	0.198	0.477	1276	790
1	6774682	6777568	RLOC_00002207	8	+	7.7	3.2	0.634	0.831	99	77
1	6778886	6781222	RLOC_00002208	144	+	143.6	131.6	0.126	0.393	145	123
1	6796070	6799793	RLOC_00002213	122	-	121.7	121.1	0.0693	0.3	45	43
1	6799968	6802906	RLOC_00002214	6	-	6.2	6.1	0.0225	0.175	392	454
1	6803425	6805091	RLOC_00002215	6	-	6.1	-1.2	0.487	0.738	268	116
1	6805325	6807928	RLOC_00002216	6	+	5.8	4.8	0.113	0.374	88	58
1	6807679	6813063	RLOC_00002217	50	-	49.8	-38.1	0.766	0.903	135	119
1	6816611	6822745	RLOC_00002220	83	-	83.1	76.6	0.574	0.795	158	145
1	6822843	6824210	RLOC_00002221	13	-	13.4	8.7	0.155	0.43	85	58
1	6824320	6826194	RLOC_00002222	38	+	38.0	-37.8	0.0602	0.287	506	307
1	6832304	6834631	RLOC_00002224	7	+	7.4	-5.8	0.193	0.473	244	166
1	6846332	6848122	RLOC_00002227	3	+	3.4	-3.2	0.364	0.641	120	107
1	6855898	6860563	RLOC_00002230	37	-	37.3	29.0	0.178	0.453	80	109
1	6886670	6891437	RLOC_00002232	120	+	120.4	-120.1	0.281	0.563	36	36
1	6891362	6894752	RLOC_00002233	78	-	77.7	-57.3	0.315	0.597	53	36
1	6895008	6898818	RLOC_00002234	5	-	4.5	2.1	0.799	0.917	111	136
1	6900288	6904157	RLOC_00002235	42	-	42.3	20.3	0.753	0.896	76	66
1	6913000	6914689	RLOC_00002238	7	+	6.8	-4.8	0.0153	0.144	879	859
1	6914517	6916823	RLOC_00002239	3	-	3.3	-0.2	0.746	0.892	160	162
1	6937718	6940832	RLOC_00002249	12	-	11.9	-9.0	0.341	0.621	495	351
1	6942660	6945128	RLOC_00002252	16	+	16.3	-15.2	0.645	0.838	1211	917
1	6949000	6968965	RLOC_00002255	3083	+	3082.6	3082.0	0.00064	0.0206	357	462
1	6969024	6971049	RLOC_00002262	33	-	33.4	-33.0	0.068	0.298	169	183
1	6971441	6977274	RLOC_00002263	69	+	69.1	61.2	0.187	0.464	155	132
1	6987271	6993972	RLOC_00002268	19	-	19.5	19.5	0.022	0.173	50	28
1	6998056	6999841	RLOC_00002271	17	-	16.7	-15.7	0.0481	0.254	197	167
1	7001086	7004435	RLOC_00002272	42	-	42.3	31.5	0.172	0.447	199	173
1	7004770	7009477	RLOC_00002274	113	-	112.5	-100.2	0.305	0.588	402	303
1	7016598	7020690	RLOC_00002278	19	+	18.8	-14.5	0.7	0.868	388	357
1	7038526	7040231	RLOC_00002285	11	-	11.5	-6.6	0.0224	0.175	435	369
1	7042045	7043392	RLOC_00002286	2	-	1.5	0.4	0.00238	0.0466	17877	13017
1	7051576	7053745	RLOC_00002292	10	-	9.6	8.1	0.118	0.384	37	35
1	7083160	7085858	RLOC_00002299	14	-	14.2	-13.2	0.61	0.819	972	746
1	7087902	7089606	RLOC_00002301	2	-	1.9	-0.6	0.968	0.983	558	254
1	7090940	7093442	RLOC_00002302	9	+	8.6	-0.2	0.546	0.778	51	45
1	7103361	7106121	RLOC_00002309	5	-	5.3	3.1	0.88	0.948	99	61
1	7112611	7115411	RLOC_00002313	6	+	5.7	2.9	0.335	0.615	70	43
1	7119645	7126559	RLOC_00002315	48	-	48.3	-47.9	0.154	0.428	60	51
1	7126730	7128747	RLOC_00002316	12	-	11.9	7.0	0.114	0.377	52	48
1	7128859	7130794	RLOC_00002317	9	+	9.2	8.7	0.113	0.375	263	141
1	7142619	7149908	RLOC_00002321	19	+	18.5	-18.1	0.151	0.424	4773	3788
1	7154409	7158287	RLOC_00002322	17	+	17.1	-16.2	0.244	0.527	36	41
1	7157825	7160707	RLOC_00002323	23	-	23.3	18.9	0.259	0.542	209	134
1	7164004	7168040	RLOC_00002325	24	-	23.8	0.9	0.866	0.943	39	45
1	7174276	7176617	RLOC_00002329	870	-	870.2	868.0	3.06e-05	0.00223	54	55
1	7176746	7178895	RLOC_00002331	3	+	2.7	2.0	0.648	0.839	859	734
1	7179272	7181604	RLOC_00002332	5	+	5.2	2.6	0.381	0.653	572	430
1	7209297	7214993	RLOC_00002341	40	+	40.2	-39.6	0.293	0.574	95	71
1	7215009	7216897	RLOC_00002342	28	-	28.3	28.0	0.295	0.577	70	55
1	7231980	7235128	RLOC_00002353	26	+	26.5	-15.1	0.788	0.913	209	161
1	7242895	7244981	RLOC_00002356	14	+	14.3	12.9	0.0631	0.292	58	45
1	7252110	7253747	RLOC_00002359	117	+	117.4	-114.4	0.761	0.902	139	110
1	7261995	7265555	RLOC_00002363	44	-	43.9	-34.8	0.0618	0.289	49	46
1	7265791	7267392	RLOC_00002364	22	-	21.7	20.4	0.285	0.566	46	34
1	7276897	7281236	RLOC_00002366	8	-	7.6	6.4	0.3	0.581	45	32
1	7285053	7292580	RLOC_00002367	45	+	45.1	33.4	0.557	0.783	67	80
1	7297233	7310262	RLOC_00002371	254	-	254.1	-214.3	0.205	0.486	331	258
1	7313900	7319921	RLOC_00002372	8	+	8.2	-4.1	0.846	0.933	88	84
1	7324470	7329441	RLOC_00002373	60	+	60.3	-55.2	0.0688	0.3	116	115
1	7337604	7339509	RLOC_00002376	11	+	11.4	-7.1	0.178	0.454	377	203
1	7366589	7368203	RLOC_00002381	4	+	3.9	0.6	0.333	0.613	262	218
1	7370610	7375893	RLOC_00002383	16	+	16.2	7.7	0.576	0.796	810	541
1	7378535	7382661	RLOC_00002385	25	-	25.0	16.2	0.0695	0.301	128	112
1	7386761	7388514	RLOC_00002387	5	-	5.5	4.4	0.414	0.681	89	121
1	7398813	7400820	RLOC_00002390	76	-	76.2	63.6	0.107	0.367	567	359
1	7419657	7420957	RLOC_00002395	11	-	11.4	9.4	0.0743	0.31	156	127
1	7421155	7427335	RLOC_00002396	1679	+	1678.9	1673.5	0.00133	0.0325	32	28
1	7444636	7448483	RLOC_00002405	11	+	11.2	-10.7	0.0535	0.268	79	83
1	7447489	7448483	RLOC_00002406	10	-	10.4	8.1	0.388	0.659	33	24
1	7453233	7455076	RLOC_00002410	16	-	15.7	-8.3	0.00265	0.0498	206	863
1	7476889	7479258	RLOC_00002420	8	-	8.3	8.2	0.411	0.679	169	108
1	7485635	7488780	RLOC_00002423	6	-	5.9	4.6	0.173	0.449	88	76
1	7493212	7499638	RLOC_00002428	78	+	78.1	76.2	0.421	0.687	458	347
1	7502081	7504275	RLOC_00002431	10	-	9.9	8.2	0.434	0.699	128	94
1	7508678	7513472	RLOC_00002432	84	+	83.7	70.7	0.306	0.588	88	67
1	7529704	7531108	RLOC_00002439	6	-	6.3	6.0	0.0226	0.175	1809	1493
1	7554670	7557112	RLOC_00002449	24	+	24.1	3.0	0.471	0.725	39	32
1	7557139	7565914	RLOC_00002450	42	-	41.6	-39.3	0.654	0.842	56	90
1	7566193	7570014	RLOC_00002451	51	-	50.6	-50.6	0.00518	0.0767	155	110
1	7570844	7573847	RLOC_00002452	7	-	7.3	-2.9	0.431	0.696	187	135
1	7573829	7578967	RLOC_00002453	17	+	17.1	13.2	0.864	0.942	42	35
1	7581007	7588177	RLOC_00002455	14	+	14.3	-14.2	0.0777	0.316	144	118
1	7588413	7592952	RLOC_00002456	50	+	49.7	-43.9	0.0706	0.303	147	107
1	7605627	7609243	RLOC_00002459	37	+	37.3	28.4	0.975	0.987	68	56
1	7612833	7615374	RLOC_00002461	8	+	7.5	0.8	0.231	0.514	259	160
1	7615504	7618628	RLOC_00002462	10	+	10.1	9.8	0.102	0.361	77	66
1	7619884	7624125	RLOC_00002465	15	-	14.9	10.8	0.345	0.625	53	54
1	7624319	7626150	RLOC_00002466	33	+	32.5	-27.7	0.261	0.544	32	42
1	7626181	7628315	RLOC_00002467	7	+	6.7	4.0	0.00416	0.0664	231	208
1	7645609	7648855	RLOC_00002472	15	+	15.4	13.2	0.52	0.762	175	186
1	7649147	7654026	RLOC_00002473	32	+	31.7	25.8	0.819	0.923	222	218
1	7651571	7652288	RLOC_00002474	20	-	19.6	19.6	2.06e-06	0.000338	247	272
1	7660886	7662743	RLOC_00002479	7	-	6.7	-0.5	0.873	0.945	488	198
1	7666427	7668827	RLOC_00002481	57	+	56.8	41.5	0.108	0.37	46	27
1	7680416	7683030	RLOC_00002487	23	+	22.5	21.1	0.477	0.731	58	63
1	7690801	7692459	RLOC_00002490	8	-	8.4	7.2	0.524	0.764	106	134
1	7704147	7706355	RLOC_00002492	7	-	6.8	-0.6	0.327	0.608	266	172
1	7712818	7714459	RLOC_00002495	8	+	8.0	-6.9	0.0518	0.264	93	83
1	7734660	7738772	RLOC_00002502	10	+	9.9	-0.9	0.705	0.87	102	95
1	7754269	7758188	RLOC_00002509	19	+	19.3	-15.7	0.835	0.93	56	71
1	7771507	7773220	RLOC_00002513	6	+	6.3	-3.1	0.785	0.912	43	52
1	7772865	7781638	RLOC_00002515	148	-	148.0	139.8	0.141	0.411	95	83
1	7789132	7792201	RLOC_00002518	8	+	8.5	7.6	0.11	0.372	83	70
1	7814662	7815722	RLOC_00002527	8	-	7.5	-4.0	0.381	0.653	270	178
1	7823065	7823971	RLOC_00002529	6	+	6.1	-3.1	0.408	0.676	87	56
1	7835780	7837411	RLOC_00002534	29	+	28.7	-12.0	0.0942	0.348	120	72
1	7837486	7840898	RLOC_00002535	23	-	23.3	-15.7	0.284	0.565	98	70
1	7865472	7866422	RLOC_00002542	8	+	8.0	-3.5	0.104	0.363	268	149
1	7873866	7876018	RLOC_00002545	21	+	20.9	-20.8	0.0334	0.214	96	91
1	7878758	7881395	RLOC_00002547	26	-	26.5	0.2	0.000287	0.012	576	515
1	7886323	7889544	RLOC_00002550	176	+	176.4	171.9	0.0859	0.333	46	35
1	7892757	7897705	RLOC_00002552	74	-	73.8	7.4	0.773	0.906	75	69
1	7911900	7915093	RLOC_00002558	7	+	6.7	-4.0	0.204	0.485	305	311
1	7919076	7921893	RLOC_00002560	53	+	53.1	51.9	0.149	0.421	172	167
1	7925120	7927345	RLOC_00002562	7	+	7.1	-4.5	0.653	0.842	272	252
1	7949475	7950900	RLOC_00002568	4	+	4.3	-2.3	0.855	0.938	36	54
1	7950561	7954453	RLOC_00002570	66	-	65.7	-51.4	0.553	0.781	138	109
1	7955420	7958575	RLOC_00002572	7	-	7.1	-0.5	0.888	0.95	201	349
1	7966473	7968692	RLOC_00002574	8	-	7.8	-6.6	0.439	0.702	23	27
1	7981721	7984334	RLOC_00002578	23	+	23.2	-17.6	0.000245	0.0107	105	107
1	7994165	8002989	RLOC_00002580	17	-	17.2	-4.7	0.0987	0.357	48	55
1	7994193	7997786	RLOC_00002581	11	+	11.0	10.6	0.0573	0.279	108	107
1	8003222	8004317	RLOC_00002582	3	+	2.6	1.0	0.911	0.958	357	278
1	8005931	8007583	RLOC_00002583	10	+	10.1	-7.0	0.0708	0.303	318	128
1	8027166	8028189	RLOC_00002588	1	+	0.8	0.1	0.846	0.933	616	408
1	8028082	8030136	RLOC_00002589	4	-	4.3	0.1	0.619	0.822	332	267
1	8030586	8033156	RLOC_00002591	5	-	5.1	4.8	0.789	0.914	392	357
1	8046132	8052953	RLOC_00002593	75	+	74.9	-27.3	0.632	0.83	301	301
1	8061750	8067790	RLOC_00002595	35	+	35.2	35.2	0.278	0.56	62	50
1	8067870	8071582	RLOC_00002596	12	+	11.9	10.8	0.739	0.889	820	582
1	8076414	8080603	RLOC_00002600	7	+	7.5	5.8	0.67	0.851	467	425
1	8080461	8083012	RLOC_00002602	6	-	6.1	0.3	0.211	0.493	486	515
1	8083183	8094509	RLOC_00002604	662	+	662.3	-662.2	0.259	0.542	52	58
1	8098391	8102500	RLOC_00002607	92	+	91.8	-91.5	0.0378	0.226	193	204
1	8102725	8103618	RLOC_00002608	4	+	3.9	-2.7	0.611	0.819	145	134
1	8104992	8108361	RLOC_00002610	28	+	28.1	26.5	0.59	0.805	98	84
1	8109573	8112061	RLOC_00002611	4	-	4.0	1.1	0.655	0.843	83	74
1	8117285	8122151	RLOC_00002612	29	+	29.2	20.5	0.384	0.655	155	144
1	8122353	8125138	RLOC_00002613	6	+	6.2	2.4	0.982	0.99	49	33
1	8125013	8127277	RLOC_00002614	34	-	33.9	28.7	0.979	0.988	47	35
1	8130603	8134388	RLOC_00002616	14	-	13.9	-7.4	0.857	0.939	68	53
1	8147736	8153796	RLOC_00002622	287	-	287.2	287.2	0.00971	0.112	50	85
1	8156503	8159185	RLOC_00002624	9	+	8.7	-8.6	0.32	0.601	81	81
1	8164781	8166862	RLOC_00002626	115	+	115.5	-50.6	0.495	0.744	71	74
1	8180116	8183650	RLOC_00002631	15	-	15.4	11.3	0.265	0.547	544	337
1	8200323	8201267	RLOC_00002637	5	+	4.8	-4.7	1.9e-06	0.00032	2072	1856
1	8212646	8219652	RLOC_00002644	309	+	309.0	-304.0	0.17	0.445	53	46
1	8219807	8224547	RLOC_00002645	5	+	4.7	4.0	0.528	0.766	179	188
1	8242360	8252056	RLOC_00002650	348	+	348.2	-347.2	0.329	0.61	146	114
1	8256853	8258741	RLOC_00002653	4	-	4.1	1.4	0.446	0.706	175	142
1	8260559	8266048	RLOC_00002655	5	-	4.6	3.3	0.85	0.935	103	73
1	8262924	8263739	RLOC_00002656	2	+	1.8	-0.4	0.283	0.565	1703	1060
1	8267809	8271996	RLOC_00002657	7	-	6.6	0.9	0.277	0.559	5919	5555
1	8279553	8282421	RLOC_00002659	34	-	34.2	26.8	0.00251	0.0482	34	42
1	8295077	8296941	RLOC_00002662	17	-	16.8	-12.6	0.824	0.925	61	57
1	8308964	8310916	RLOC_00002668	18	-	18.3	-16.2	0.0389	0.23	1120	209
1	8311966	8315876	RLOC_00002669	13	-	12.7	-5.8	0.404	0.674	116	121
1	8321589	8329910	RLOC_00002673	62	+	62.2	-27.1	0.902	0.955	169	161
1	8332892	8336430	RLOC_00002675	10	+	9.7	-6.9	0.543	0.777	65	57
1	8336579	8338827	RLOC_00002676	11	+	11.1	-9.3	0.7	0.868	903	697
1	8385201	8386551	RLOC_00002699	13	+	12.7	-12.2	0.315	0.597	81	46
1	8398114	8399836	RLOC_00002703	2	-	2.2	-1.6	0.346	0.625	735	689
1	8400055	8401550	RLOC_00002704	6	+	6.3	3.8	0.579	0.798	58	37
1	8406662	8408530	RLOC_00002707	14	-	14.2	14.2	0.0681	0.299	112	111
1	8420183	8422991	RLOC_00002711	17	+	16.7	16.0	0.187	0.464	270	188
1	8427242	8429570	RLOC_00002716	39	-	38.6	23.9	0.229	0.513	150	116
1	8432061	8438811	RLOC_00002717	43	+	42.9	-41.6	0.799	0.917	132	76
1	8441067	8447681	RLOC_00002719	80	+	79.5	69.1	0.548	0.779	76	64
1	8469510	8471417	RLOC_00002725	31	-	31.0	30.4	0.148	0.419	90	76
1	8478387	8481599	RLOC_00002726	14	-	14.1	-10.6	0.164	0.438	172	172
1	8500118	8502065	RLOC_00002734	8	-	7.6	6.7	0.318	0.6	185	91
1	8502312	8506815	RLOC_00002735	302	-	302.4	241.5	0.0107	0.117	68	47
1	8506971	8508936	RLOC_00002737	3	+	2.7	1.5	0.932	0.968	181	179
1	8525333	8527087	RLOC_00002745	6	-	6.3	-6.0	0.193	0.472	156	85
1	8529031	8532262	RLOC_00002747	73	-	73.1	-50.2	0.0669	0.297	60	46
1	8540837	8542053	RLOC_00002751	9	+	8.5	4.7	0.435	0.7	39	42
1	8542225	8543605	RLOC_00002752	10	+	9.7	4.8	0.392	0.662	95	76
1	8544273	8545628	RLOC_00002753	9	+	8.9	-7.6	0.273	0.556	212	168
1	8553312	8556750	RLOC_00002756	12	-	11.9	-0.5	0.111	0.372	181	107
1	8557214	8559066	RLOC_00002757	18	-	18.0	-15.5	0.119	0.384	44	61
1	8560397	8570594	RLOC_00002758	135	-	134.8	-122.6	0.361	0.638	157	151
1	8586334	8588180	RLOC_00002764	8	+	8.0	0.3	0.87	0.945	53	24
1	8604021	8607484	RLOC_00002770	28	-	28.0	-24.5	0.0067	0.0884	89	50
1	8612436	8620696	RLOC_00002774	21	-	21.2	12.2	0.935	0.97	49	63
1	8624037	8626465	RLOC_00002775	12	+	12.0	11.9	0.152	0.426	63	46
1	8635192	8639082	RLOC_00002778	8	+	8.4	6.4	0.36	0.636	39	45
1	8638519	8640825	RLOC_00002779	8	-	7.8	7.7	0.279	0.561	77	76
1	8640560	8644436	RLOC_00002780	23	+	22.9	-1.4	0.599	0.812	395	296
1	8661872	8664046	RLOC_00002793	7	+	7.3	5.4	0.728	0.884	84	57
1	8664063	8665569	RLOC_00002794	9	+	9.1	-7.7	0.446	0.707	59	57
1	8665741	8672757	RLOC_00002795	24	+	24.3	5.4	0.342	0.622	53	56
1	8682197	8685325	RLOC_00002801	26	+	26.1	23.3	0.647	0.838	105	63
1	8685177	8688250	RLOC_00002802	39	-	38.7	-30.1	0.324	0.606	358	316
1	8702360	8705879	RLOC_00002807	13	+	13.5	0.5	0.169	0.444	55	56
1	8710846	8711578	RLOC_00002810	7	-	6.9	-2.2	0.806	0.918	28	38
1	8725831	8727348	RLOC_00002816	4	-	4.2	-3.9	0.317	0.6	81	55
1	8741835	8755604	RLOC_00002822	831	+	831.3	-701.4	0.145	0.416	61	56
1	8759518	8763398	RLOC_00002826	73	-	73.4	-72.9	0.0145	0.139	56	47
1	8765613	8771553	RLOC_00002827	30	+	30.2	-9.1	0.899	0.955	444	405
1	8775800	8778080	RLOC_00002830	181	+	181.2	159.0	3.22e-17	1.07e-13	2029	1894
1	8778279	8783851	RLOC_00002831	510	+	510.0	-474.8	0.0233	0.178	105	111
1	8784047	8785881	RLOC_00002832	9	+	8.7	-8.0	0.382	0.655	348	315
1	8798353	8800602	RLOC_00002836	181	+	180.9	159.0	5.44e-17	1.09e-13	2031	1894
1	8801703	8806380	RLOC_00002839	610	+	610.0	-606.9	0.0237	0.18	106	112
1	8806575	8808361	RLOC_00002840	49	+	48.8	37.6	0.477	0.731	348	315
1	8812707	8820744	RLOC_00002843	182	+	182.1	170.5	0.000462	0.0166	2132	2008
1	8820931	8822843	RLOC_00002844	51	+	50.7	35.1	0.265	0.548	347	316
1	8826982	8832975	RLOC_00002846	194	+	194.1	160.9	5.12e-18	2.56e-14	2043	1916
1	8833066	8837048	RLOC_00002847	20	+	20.2	-19.3	0.771	0.905	439	399
1	8835418	8839609	RLOC_00002848	108	-	108.3	90.7	0.904	0.955	68	49
1	8839925	8842405	RLOC_00002850	10	-	9.8	-1.1	0.703	0.869	168	197
1	8853533	8855874	RLOC_00002857	14	-	13.7	12.1	0.175	0.45	258	203
1	8860526	8861522	RLOC_00002859	2	+	1.9	-1.7	0.649	0.839	855	726
1	8863767	8866894	RLOC_00002861	37	+	37.5	-35.6	0.186	0.462	97	93
1	8867023	8869289	RLOC_00002862	110	+	109.8	-109.3	0.0072	0.0925	36	36
1	8889011	8894325	RLOC_00002869	11	-	10.7	6.4	0.0154	0.145	126	101
1	8900018	8909334	RLOC_00002872	1256	-	1256.1	1256.1	0.0771	0.314	47	48
1	8903404	8906455	RLOC_00002873	11	+	10.9	-6.7	0.195	0.473	49	27
1	8915914	8918279	RLOC_00002876	7	+	6.7	1.2	0.857	0.939	113	72
1	8922549	8924511	RLOC_00002878	14	+	14.4	-9.0	0.54	0.775	52	39
1	8933198	8935482	RLOC_00002881	15	-	15.4	-9.9	0.00138	0.0331	343	209
1	8938386	8940613	RLOC_00002882	9	-	8.5	3.4	0.852	0.936	57	50
1	8951161	8955160	RLOC_00002887	57	+	57.4	-56.7	0.0648	0.294	204	201
1	8962116	8965340	RLOC_00002890	19	+	19.1	9.9	0.834	0.93	65	75
1	8976325	8978305	RLOC_00002893	10	+	9.9	-9.9	0.0342	0.216	415	119
1	8981555	8983314	RLOC_00002894	11	-	11.0	-7.2	0.156	0.43	882	113
1	9002237	9004716	RLOC_00002897	11	-	10.7	8.9	0.324	0.606	89	62
1	9024326	9027955	RLOC_00002904	22	-	22.5	-22.0	0.191	0.469	303	326
1	9038707	9043861	RLOC_00002908	74	-	74.0	-14.2	0.307	0.589	93	51
1	9047238	9054961	RLOC_00002910	38	-	37.9	-16.2	0.273	0.556	44	37
1	9054672	9057020	RLOC_00002911	17	+	17.3	15.8	0.582	0.8	60	64
1	9063270	9075307	RLOC_00002913	1195	-	1194.6	1194.6	0.00369	0.0621	139	93
1	9066280	9068693	RLOC_00002914	51	+	50.6	-25.4	0.0944	0.348	70	42
1	9070892	9075586	RLOC_00002916	112	+	112.0	108.6	0.113	0.376	86	67
1	9089468	9092560	RLOC_00002922	20	-	20.2	-17.4	0.0197	0.163	121	69
1	9095767	9099768	RLOC_00002923	5	-	4.8	-0.6	0.973	0.986	55	46
1	9113866	9114994	RLOC_00002928	23	+	23.2	-23.2	0.0145	0.139	61	41
1	9121421	9125578	RLOC_00002932	40	-	40.2	27.2	0.693	0.864	29	28
1	9151627	9154762	RLOC_00002941	18	+	17.8	16.0	0.276	0.559	73	65
1	9155090	9156370	RLOC_00002942	6	+	5.5	-5.1	0.22	0.503	109	82
1	9171127	9173064	RLOC_00002952	6	+	6.1	4.7	0.138	0.409	330	296
1	9178211	9181967	RLOC_00002954	19	+	19.1	17.7	0.71	0.872	107	68
1	9184566	9187578	RLOC_00002956	10	+	10.0	-7.6	0.842	0.932	122	113
1	9205827	9207458	RLOC_00002961	4	+	4.0	-3.2	0.000122	0.00626	3250	2679
1	9207342	9209902	RLOC_00002962	42	-	41.7	-31.5	0.527	0.765	57	43
1	9210064	9214005	RLOC_00002963	46	+	46.3	41.7	0.717	0.878	118	80
1	9214071	9215557	RLOC_00002964	2	+	2.4	2.2	0.0754	0.312	42	47
1	9215769	9218010	RLOC_00002965	5	+	5.5	4.5	0.244	0.527	276	278
1	9224058	9225792	RLOC_00002967	5	-	4.8	4.8	0.00563	0.0798	54	53
1	9244952	9246633	RLOC_00002974	6	-	5.9	-0.7	0.892	0.951	83	49
1	9246755	9248292	RLOC_00002975	9	+	9.0	-6.2	0.509	0.755	71	64
1	9250030	9251654	RLOC_00002978	79	-	78.7	68.0	0.0665	0.297	113	80
1	9259431	9261313	RLOC_00002982	15	+	14.7	-12.7	0.0729	0.307	99	97
1	9295640	9300796	RLOC_00002996	40	+	39.8	-37.8	0.773	0.907	110	114
1	9300805	9304328	RLOC_00002997	10	-	10.3	-4.1	0.434	0.699	476	415
1	9315304	9318277	RLOC_00003000	16	-	16.4	-15.3	0.0193	0.162	755	579
1	9321659	9324395	RLOC_00003004	11	+	11.3	8.9	0.962	0.981	71	40
1	9329383	9332148	RLOC_00003006	9	+	9.2	-3.1	0.411	0.679	318	115
1	9336056	9337938	RLOC_00003008	15	-	15.4	15.3	0.218	0.5	27	28
1	9343113	9345323	RLOC_00003009	7	+	7.2	-0.9	0.188	0.465	41	47
1	9351217	9352935	RLOC_00003010	2	+	1.9	-0.5	0.413	0.68	555	425
1	9373884	9376828	RLOC_00003016	4	+	3.8	-2.4	0.576	0.796	213	180
1	9393674	9396858	RLOC_00003022	120	+	120.2	103.7	0.345	0.625	61	61
1	9403752	9406369	RLOC_00003025	7	-	7.5	6.6	0.534	0.77	367	330
1	9407084	9411368	RLOC_00003026	19	-	18.5	3.4	0.474	0.727	220	165
1	9421008	9424084	RLOC_00003028	11	+	11.2	9.1	0.00658	0.0874	39	26
1	9425279	9426897	RLOC_00003030	7	+	7.5	-4.4	0.0616	0.289	267	241
1	9428991	9432307	RLOC_00003033	22	+	22.5	-9.4	0.0823	0.325	81	78
1	9446596	9449046	RLOC_00003037	3	-	3.4	-2.9	0.018	0.156	187	133
1	9449293	9451777	RLOC_00003038	44	-	44.0	-42.8	0.00236	0.0463	54	48
1	9455276	9458176	RLOC_00003040	12	-	12.0	-11.1	0.213	0.494	148	102
1	9481404	9482992	RLOC_00003053	2	+	2.4	-0.3	0.735	0.887	473	243
1	9483127	9484686	RLOC_00003054	18	+	18.5	17.8	0.177	0.452	76	84
1	9484315	9486002	RLOC_00003056	4	-	4.2	1.7	0.451	0.71	390	336
1	9486888	9492632	RLOC_00003057	22	+	22.1	-19.3	0.97	0.984	154	148
1	9492848	9494382	RLOC_00003058	3	+	3.1	2.4	0.983	0.99	211	199
1	9495343	9498085	RLOC_00003059	6	+	5.5	2.9	0.605	0.815	96	77
1	9497999	9499639	RLOC_00003060	7	-	6.9	6.8	0.0468	0.251	356	253
1	9508679	9512860	RLOC_00003063	51	-	50.6	45.9	0.325	0.607	153	131
1	9513080	9515050	RLOC_00003064	20	-	20.4	-3.4	0.44	0.702	162	123
1	9515113	9517070	RLOC_00003065	11	+	10.9	-9.2	0.0857	0.332	872	700
1	9520824	9527280	RLOC_00003068	14	-	14.4	-14.4	0.0391	0.23	60	42
1	9527455	9528866	RLOC_00003069	16	-	16.2	14.8	0.0435	0.242	210	139
1	9531808	9534141	RLOC_00003071	20	+	20.3	11.8	0.0205	0.168	441	331
1	9534499	9537728	RLOC_00003072	20	+	20.0	13.4	0.286	0.567	58	59
1	9540021	9545040	RLOC_00003074	14	-	13.6	-10.5	0.123	0.389	43	26
1	9544409	9546285	RLOC_00003075	16	+	15.9	9.1	0.267	0.549	86	102
1	9554709	9558461	RLOC_00003078	30	-	29.6	-11.6	0.201	0.481	103	102
1	9558561	9562485	RLOC_00003079	86	+	85.6	-79.9	0.417	0.683	45	45
1	9562486	9564031	RLOC_00003080	7	-	6.5	-2.9	0.348	0.626	211	182
1	9565857	9567906	RLOC_00003082	37	-	37.0	31.9	0.257	0.538	130	119
1	9574549	9575189	RLOC_00003088	5	+	4.7	-1.0	0.597	0.81	91	57
1	9592092	9603548	RLOC_00003091	253	+	253.3	-186.5	0.778	0.909	61	60
1	9603525	9606247	RLOC_00003092	49	-	48.5	-46.7	0.0942	0.348	84	58
1	9611052	9614336	RLOC_00003095	67	+	67.3	-58.8	0.146	0.417	44	39
1	9614550	9616574	RLOC_00003097	19	+	18.9	-14.9	0.000723	0.0223	239	213
1	9636587	9640225	RLOC_00003102	139	+	138.6	-129.6	0.101	0.36	161	142
1	9639858	9641911	RLOC_00003103	16	-	15.7	13.7	0.265	0.547	31	24
1	9662020	9667595	RLOC_00003109	8	+	7.6	3.3	0.884	0.949	55	46
1	9668507	9671657	RLOC_00003110	90	+	90.1	-78.9	0.693	0.864	142	102
1	9671631	9676307	RLOC_00003111	219	-	219.0	-217.9	0.862	0.941	74	41
1	9698297	9704013	RLOC_00003119	27	+	27.4	-27.4	0.0215	0.172	78	40
1	9720727	9724800	RLOC_00003125	23	-	23.3	-21.0	0.0413	0.236	30	33
1	9726606	9733000	RLOC_00003126	134	-	134.4	133.4	0.186	0.463	206	160
1	9740583	9742497	RLOC_00003129	3	+	2.8	2.1	0.753	0.896	1201	897
1	9746708	9752775	RLOC_00003131	377	+	377.4	376.1	0.00669	0.0884	445	409
1	9778850	9784069	RLOC_00003141	157	+	157.0	-115.6	0.134	0.402	105	77
1	9795717	9799118	RLOC_00003143	14	+	13.8	-2.0	0.614	0.82	31	34
1	9812929	9815565	RLOC_00003148	13	-	12.7	12.3	0.679	0.857	124	103
1	9825270	9828528	RLOC_00003149	26	+	26.4	-14.7	0.822	0.924	72	96
1	9829137	9834487	RLOC_00003150	1001	-	1001.4	999.3	1.54e-08	5.13e-06	220	128
1	9834641	9836210	RLOC_00003152	11	-	11.3	-8.0	0.805	0.918	245	200
1	9849843	9852449	RLOC_00003158	12	-	12.0	-8.6	0.761	0.901	120	114
1	9868199	9872250	RLOC_00003162	41	-	40.6	39.4	0.795	0.916	48	54
1	9874202	9875615	RLOC_00003163	8	+	8.2	7.5	0.366	0.642	93	57
1	9875466	9879433	RLOC_00003164	117	-	117.4	115.8	0.213	0.494	49	40
1	9884274	9887666	RLOC_00003168	77	-	77.0	76.8	0.00227	0.045	157	92
1	9889100	9891015	RLOC_00003169	9	-	8.8	-8.5	0.0255	0.188	321	335
1	9920144	9924484	RLOC_00003174	28	-	28.3	-27.9	0.106	0.366	65	54
1	9933732	9935440	RLOC_00003177	40	-	39.6	35.8	0.118	0.384	811	536
1	9940000	9943661	RLOC_00003180	16	+	16.5	-6.0	0.797	0.917	106	91
1	9963447	9966320	RLOC_00003185	15	+	14.6	13.5	0.505	0.753	74	77
1	9969309	9973893	RLOC_00003188	595	-	594.9	-594.3	0.000148	0.00723	295	330
1	9976140	9979793	RLOC_00003189	86	-	86.1	86.1	0.00691	0.0897	41	32
1	9979477	9987737	RLOC_00003190	238	+	237.7	-237.7	0.444	0.705	54	49
1	9996712	10000455	RLOC_00003193	22	+	22.5	6.2	0.267	0.55	165	159
1	10015898	10018160	RLOC_00003202	42	+	42.0	-27.1	0.299	0.58	85	71
1	10023816	10026311	RLOC_00003204	24	+	23.7	-10.2	0.07	0.302	67	59
1	10029062	10032032	RLOC_00003205	57	+	57.5	-22.9	0.0215	0.172	82	90
1	10035666	10037662	RLOC_00003207	150	+	149.9	105.5	0.0797	0.32	69	44
1	10044336	10046552	RLOC_00003211	19	-	19.0	16.2	0.508	0.754	104	187
1	10050936	10053218	RLOC_00003214	30	-	30.3	-9.9	0.272	0.555	119	57
1	10074358	10076457	RLOC_00003221	6	-	6.0	-5.8	0.502	0.751	125	77
1	10078196	10081681	RLOC_00003223	104	+	104.3	99.9	0.0163	0.149	67	48
1	10105024	10111744	RLOC_00003251	282	-	281.6	-281.6	0.135	0.405	111	106
1	10134055	10136241	RLOC_00003267	23	+	23.2	20.1	0.511	0.756	89	99
1	10136130	10139176	RLOC_00003270	394	-	394.5	368.3	0.811	0.92	40	54
1	10147604	10151539	RLOC_00003272	5	+	4.7	0.2	0.893	0.951	1531	1165
1	10174186	10178521	RLOC_00003280	32	+	31.6	31.6	0.217	0.499	120	79
1	10180301	10182808	RLOC_00003282	8	+	7.8	-3.7	0.0358	0.221	342	290
1	10210182	10212722	RLOC_00003290	6	-	5.6	1.4	0.813	0.92	46	29
1	10223176	10224720	RLOC_00003293	5	-	5.4	-3.9	0.625	0.827	272	182
1	10224814	10226322	RLOC_00003294	25	+	25.0	23.4	0.398	0.668	93	50
1	10236336	10237990	RLOC_00003296	24	+	23.9	-21.0	0.794	0.916	26	66
1	10252240	10254792	RLOC_00003299	14	+	14.2	14.2	0.0183	0.157	100	88
1	10258212	10261232	RLOC_00003301	31	-	31.4	-29.6	0.141	0.412	54	49
1	10264042	10266917	RLOC_00003302	8	+	7.8	0.3	0.752	0.896	114	92
1	10268265	10273808	RLOC_00003303	17	-	16.8	7.0	0.399	0.669	203	222
1	10277747	10283515	RLOC_00003307	61	-	61.3	-58.4	0.497	0.746	192	211
1	10286066	10288103	RLOC_00003309	6	-	6.3	4.7	0.544	0.777	202	114
1	10288128	10289666	RLOC_00003310	12	-	12.2	0.9	0.781	0.91	326	53
1	10289981	10294630	RLOC_00003311	12	-	12.2	5.2	0.415	0.682	271	108
1	10300200	10301457	RLOC_00003314	16	+	15.8	-7.1	0.606	0.816	256	224
1	10302178	10303389	RLOC_00003317	7	-	6.7	2.1	0.488	0.739	206	200
1	10304269	10305348	RLOC_00003319	15	-	15.2	-8.9	0.165	0.439	313	276
1	10305515	10306951	RLOC_00003320	17	-	17.4	-17.2	0.783	0.91	184	132
1	10307351	10308246	RLOC_00003321	4	-	4.5	-2.3	0.544	0.777	206	152
1	10308519	10309896	RLOC_00003322	10	+	9.8	-6.0	0.706	0.871	391	256
1	10309264	10309404	RLOC_00003326	27	+	27.1	-27.1	0.0161	0.148	129	85
1	10310130	10314147	RLOC_00003327	9	-	8.9	6.1	0.691	0.863	416	329
1	10320988	10321968	RLOC_00003331	4	+	3.6	-2.2	0.378	0.651	329	182
1	10322516	10324836	RLOC_00003332	77	+	76.8	76.7	0.217	0.499	245	168
1	10323339	10326817	RLOC_00003333	494	-	494.1	493.7	0.00176	0.0388	52	33
1	10330425	10335698	RLOC_00003337	208	+	208.1	203.8	0.205	0.486	36	27
1	10371674	10374005	RLOC_00003346	9	+	8.7	-8.6	0.0982	0.356	687	568
1	10375650	10377908	RLOC_00003347	13	+	12.6	-11.6	0.0586	0.283	480	326
1	10378979	10382153	RLOC_00003349	9	-	9.2	-4.6	0.524	0.764	35	33
1	10384929	10387669	RLOC_00003351	14	-	14.2	-12.7	0.147	0.419	204	193
1	10424447	10429130	RLOC_00003358	29	-	29.4	-29.1	0.841	0.932	68	51
1	10429818	10432271	RLOC_00003360	124	+	124.3	124.3	0.0158	0.146	60	44
1	10435213	10437770	RLOC_00003362	9	-	9.3	3.0	0.993	0.995	47	50
1	10447346	10449969	RLOC_00003366	6	+	6.5	-4.8	0.701	0.868	254	268
1	10459382	10462938	RLOC_00003369	15	-	14.6	-12.0	0.729	0.885	253	196
1	10463098	10467626	RLOC_00003370	35	+	34.8	21.3	0.752	0.895	75	63
1	10468010	10473420	RLOC_00003371	16	+	15.7	15.5	0.193	0.473	234	124
1	10472185	10473502	RLOC_00003372	2	-	1.8	1.6	0.551	0.78	23687	15537
1	10474112	10475997	RLOC_00003373	3	-	2.8	-0.4	0.449	0.708	23251	18532
1	10477856	10479218	RLOC_00003374	1	+	1.1	-0.3	0.35	0.627	58510	37274
1	10491556	10494603	RLOC_00003378	15	+	14.9	-14.1	0.257	0.538	136	93
1	10498178	10501498	RLOC_00003381	54	-	54.1	-41.5	0.384	0.655	282	247
1	10503238	10506189	RLOC_00003382	10	-	9.6	-0.1	0.439	0.702	35	25
1	10507532	10509160	RLOC_00003383	5	+	4.8	0.5	0.409	0.677	178	144
1	10509150	10512558	RLOC_00003384	13	-	12.9	12.7	0.415	0.682	50	57
1	10546420	10548221	RLOC_00003391	8	-	7.7	2.7	0.778	0.909	71	39
1	10559495	10561545	RLOC_00003393	11	-	10.8	10.3	0.178	0.453	61	71
1	10584078	10586664	RLOC_00003396	37	-	37.1	35.9	0.436	0.7	526	485
1	10587470	10590209	RLOC_00003397	9	+	9.0	-7.3	0.684	0.859	73	78
1	10624993	10627176	RLOC_00003406	24	+	24.4	-20.0	0.142	0.413	69	57
1	10626649	10630630	RLOC_00003407	38	-	38.2	36.7	0.596	0.809	130	89
1	10638877	10640963	RLOC_00003409	10	+	9.7	-8.2	0.932	0.968	2043	1781
1	10650913	10651829	RLOC_00003412	11	+	10.9	4.8	0.583	0.8	65	58
1	10654799	10658924	RLOC_00003413	75	+	75.3	-56.5	0.225	0.509	91	120
1	10672972	10675455	RLOC_00003418	13	+	13.4	-9.0	0.107	0.368	29	25
1	10685821	10690988	RLOC_00003422	154	-	153.9	-153.3	0.0805	0.321	103	98
1	10715481	10718997	RLOC_00003425	10	+	10.4	6.0	0.0664	0.297	489	400
1	10722172	10725016	RLOC_00003427	3	+	3.0	-0.5	0.0384	0.228	12850	9681
1	10727316	10738108	RLOC_00003428	37	+	37.2	27.3	0.806	0.918	169	166
1	10758742	10762429	RLOC_00003432	7	+	7.5	-6.7	0.209	0.491	133	112
1	10762707	10770958	RLOC_00003433	142	+	141.8	30.4	0.0418	0.238	56	51
1	10779144	10786810	RLOC_00003437	8	+	7.6	1.7	0.557	0.783	85	79
1	10789697	10792725	RLOC_00003440	34	+	34.0	10.9	0.564	0.788	52	31
1	10796123	10801093	RLOC_00003441	7	-	6.9	3.2	0.702	0.869	33	35
1	10803627	10806317	RLOC_00003442	27	-	27.3	-27.2	0.266	0.549	70	41
1	10806925	10809189	RLOC_00003443	14	-	14.4	-11.2	0.0325	0.211	68	91
1	10814611	10816615	RLOC_00003447	8	+	7.7	-1.7	0.636	0.833	99	75
1	10828372	10831656	RLOC_00003452	69	+	68.8	-67.8	0.133	0.4	45	45
1	10829312	10840845	RLOC_00003453	19	-	19.2	-8.6	0.977	0.987	438	409
1	10858174	10860280	RLOC_00003457	51	-	51.5	51.0	0.0202	0.166	265	274
1	10881478	10886472	RLOC_00003462	29	+	28.7	-9.0	0.579	0.798	99	86
1	10887606	10890407	RLOC_00003463	13	+	12.6	7.4	0.506	0.754	152	151
1	10936764	10942292	RLOC_00003480	12	-	11.6	-10.9	0.38	0.652	38	32
1	10944890	10949485	RLOC_00003483	61	-	61.3	11.4	1.44e-06	0.000267	188	77
1	10966889	10968949	RLOC_00003487	109	+	109.3	109.2	0.154	0.428	51	61
1	10991291	10994209	RLOC_00003493	22	-	22.4	22.2	0.00448	0.07	580	325
1	10994242	10996223	RLOC_00003495	14	+	14.2	-14.1	0.126	0.393	74	76
1	11000883	11003618	RLOC_00003497	30	+	29.9	13.8	0.0149	0.142	78	74
1	11040249	11043773	RLOC_00003510	16	-	16.2	-10.0	0.827	0.926	79	66
1	11057104	11059037	RLOC_00003517	18	+	18.2	14.0	0.696	0.865	59	43
1	11084665	11088628	RLOC_00003522	40	+	40.0	-40.0	0.0516	0.263	51	48
1	11114692	11116195	RLOC_00003532	3	-	2.7	1.1	0.943	0.972	174	151
1	11119864	11122733	RLOC_00003534	8	+	8.0	-4.6	0.825	0.926	35	28
1	11122585	11124258	RLOC_00003535	5	-	5.0	3.1	0.249	0.531	142	85
1	11133409	11135302	RLOC_00003538	84	+	83.8	75.2	7.38e-06	0.000858	284	124
1	11137239	11142726	RLOC_00003540	1248	+	1248.1	1248.1	0.00165	0.0371	70	41
1	11142460	11144725	RLOC_00003542	3	-	3.1	0.3	0.714	0.875	227	147
1	11144743	11147628	RLOC_00003543	73	+	73.1	68.1	0.00108	0.029	137	53
1	11158539	11163470	RLOC_00003547	42	-	42.5	-39.3	0.0622	0.29	75	64
1	11170917	11172090	RLOC_00003554	7	+	6.5	4.1	0.842	0.932	151	111
1	11193345	11196426	RLOC_00003560	20	+	19.8	18.5	0.143	0.413	102	92
1	11214675	11216141	RLOC_00003564	3	-	2.6	-0.5	0.0223	0.174	17632	10498
1	11217694	11219618	RLOC_00003566	20	-	20.4	12.4	0.429	0.694	266	202
1	11246816	11249587	RLOC_00003575	97	-	96.8	-52.6	0.127	0.393	50	52
1	11249617	11253944	RLOC_00003576	17	+	17.3	10.9	0.441	0.703	235	254
1	11255807	11258832	RLOC_00003578	21	-	21.4	-13.2	0.00805	0.0999	130	133
1	11261442	11265055	RLOC_00003580	41	-	41.2	30.9	0.895	0.952	25	31
1	11273557	11276636	RLOC_00003583	7	-	7.0	-5.6	0.819	0.923	49	33
1	11310782	11312132	RLOC_00003593	5	+	5.2	0.4	0.0194	0.162	2035	2653
1	11312960	11316582	RLOC_00003594	50	-	50.5	7.4	0.976	0.987	52	39
1	11326246	11330791	RLOC_00003598	12	-	11.6	4.3	0.31	0.593	51	36
1	11330923	11333540	RLOC_00003599	6	-	6.4	-6.4	0.311	0.593	92	33
1	11349696	11355587	RLOC_00003602	89	+	88.9	88.9	0.232	0.516	99	89
1	11356075	11365098	RLOC_00003603	93	+	92.7	-76.3	0.295	0.577	101	121
1	11391224	11394922	RLOC_00003609	31	+	30.5	28.2	0.122	0.388	72	97
1	11396142	11399779	RLOC_00003611	34	+	34.2	-20.1	0.0735	0.308	185	177
1	11399606	11406809	RLOC_00003612	43	-	43.0	-41.2	0.361	0.637	39	39
1	11410430	11414517	RLOC_00003613	4	-	4.1	1.8	0.495	0.744	2789	2175
1	11414694	11416444	RLOC_00003614	11	-	10.8	9.8	0.125	0.392	69	63
1	11416445	11420998	RLOC_00003615	587	-	586.6	-586.2	0.00788	0.0988	78	71
1	11430099	11434115	RLOC_00003618	12	+	11.7	2.9	0.229	0.513	48	51
1	11434059	11436607	RLOC_00003619	177	-	177.2	-171.8	0.0931	0.346	145	117
1	11436718	11440275	RLOC_00003620	79	+	78.5	78.4	0.0761	0.313	64	39
1	11456801	11463896	RLOC_00003624	45	+	45.0	44.7	0.46	0.717	298	283
1	11461854	11463857	RLOC_00003625	27	-	26.6	-19.3	0.0438	0.243	73	55
1	11464933	11469207	RLOC_00003626	5	+	5.0	-0.6	0.949	0.975	55	42
1	11469456	11470047	RLOC_00003627	10	+	10.3	8.4	0.15	0.423	60	42
1	11469984	11471462	RLOC_00003628	8	-	8.3	1.2	0.203	0.483	93	84
1	11479762	11482939	RLOC_00003634	5	+	5.3	2.3	0.55	0.78	239	161
1	11528384	11531350	RLOC_00003651	49	+	49.0	-29.6	0.522	0.762	431	375
1	11532107	11534745	RLOC_00003652	9	+	9.0	8.9	0.00495	0.0752	3641	3319
1	11534157	11536435	RLOC_00003653	8	-	7.5	3.5	0.293	0.574	272	197
1	11537241	11539896	RLOC_00003654	7	-	7.3	2.3	0.0329	0.212	720	552
1	11546159	11548016	RLOC_00003656	30	-	30.2	26.9	0.303	0.585	47	40
1	11558617	11561920	RLOC_00003660	19	-	18.6	13.7	0.0514	0.263	148	183
1	11565511	11570454	RLOC_00003662	12	+	11.6	-9.4	0.961	0.98	290	208
1	11575319	11578030	RLOC_00003663	6	+	5.8	3.5	0.249	0.532	54	50
1	11592922	11596056	RLOC_00003666	179	-	179.3	-176.3	0.152	0.425	57	34
1	11601670	11605174	RLOC_00003669	74	-	73.9	73.8	3.65e-05	0.00257	201	147
1	11605605	11607866	RLOC_00003670	25	-	25.3	24.9	0.0225	0.175	263	213
1	11607862	11610074	RLOC_00003671	7	+	6.8	1.1	0.0149	0.142	541	403
1	11611927	11617419	RLOC_00003673	31	+	30.7	14.3	0.414	0.681	322	331
1	11640544	11641966	RLOC_00003676	12	-	11.6	11.0	0.328	0.609	45	32
1	11653499	11654833	RLOC_00003680	5	+	5.4	1.7	0.788	0.913	59	56
1	11672765	11675387	RLOC_00003687	6	+	6.3	-5.9	0.474	0.727	89	80
1	11676944	11680862	RLOC_00003689	645	+	644.8	642.5	0.00932	0.108	40	39
1	11681733	11684520	RLOC_00003691	16	+	15.9	1.9	0.513	0.758	35	33
1	11689063	11691588	RLOC_00003695	5	-	5.5	-0.2	0.393	0.663	415	337
1	11693631	11695575	RLOC_00003696	3	+	3.4	3.4	0.491	0.741	123	118
1	11712054	11716431	RLOC_00003701	27	+	27.2	18.9	0.599	0.811	92	81
1	11715078	11719963	RLOC_00003702	25	-	25.1	-24.5	0.803	0.918	72	137
1	11738156	11739386	RLOC_00003703	4	+	4.3	-3.9	0.0612	0.288	212	250
1	11738296	11740435	RLOC_00003704	2	-	2.3	-1.3	0.227	0.511	1420	1286
1	11742023	11754385	RLOC_00003706	272	-	272.3	271.9	0.315	0.598	256	212
1	11757098	11762650	RLOC_00003709	125	-	125.3	-39.4	0.082	0.324	170	112
1	11767395	11770049	RLOC_00003710	22	+	22.5	-12.0	0.646	0.838	79	56
1	11771620	11774294	RLOC_00003711	30	-	29.7	9.2	0.00113	0.0297	223	163
1	11774493	11775580	RLOC_00003712	12	+	12.1	-11.4	0.464	0.72	61	49
1	11783542	11785704	RLOC_00003716	13	+	13.3	1.3	0.384	0.655	224	155
1	11798118	11801407	RLOC_00003723	7	-	7.2	-6.0	0.227	0.511	134	107
1	11820871	11821824	RLOC_00003728	11	-	10.5	10.5	0.183	0.459	46	31
1	11827358	11829933	RLOC_00003729	39	+	39.1	-39.1	2.76e-06	0.000412	429	224
1	11846134	11856752	RLOC_00003735	118	-	117.6	-108.4	0.563	0.787	43	41
1	11869789	11877555	RLOC_00003740	68	-	68.3	-33.7	0.436	0.7	349	311
1	11881310	11886099	RLOC_00003742	7	+	6.6	-4.8	0.331	0.612	69	61
1	11920337	11923827	RLOC_00003751	22	-	22.2	-20.7	0.837	0.93	640	334
1	11928756	11929993	RLOC_00003755	3	+	3.4	-3.0	0.326	0.607	501	161
1	11955655	11957402	RLOC_00003764	5	+	4.6	3.4	0.184	0.461	786	614
1	11966480	11968004	RLOC_00003769	6	+	6.0	1.6	0.766	0.903	195	133
1	11967782	11972669	RLOC_00003770	1719	-	1719.0	1719.0	7.35e-06	0.000858	199	134
1	12004852	12008880	RLOC_00003777	12	+	12.3	-5.6	0.265	0.547	152	95
1	12010878	12012547	RLOC_00003778	6	+	6.0	3.6	0.79	0.914	1749	1227
1	12023224	12024783	RLOC_00003781	5	+	5.3	5.0	0.00657	0.0873	2301	1761
1	12026958	12030892	RLOC_00003783	29	+	28.7	-10.2	0.0938	0.347	94	47
1	12046378	12050095	RLOC_00003789	41	+	40.6	19.4	0.13	0.398	93	92
1	12050712	12054811	RLOC_00003790	29	-	29.2	-0.2	0.565	0.789	201	145
1	12057197	12059792	RLOC_00003793	24	-	23.8	23.6	0.0414	0.236	51	71
1	12068035	12070455	RLOC_00003796	31	-	30.5	30.5	0.389	0.66	74	61
1	12074098	12076289	RLOC_00003798	13	+	13.3	-4.0	0.494	0.744	66	66
1	12084905	12088993	RLOC_00003802	253	+	252.6	249.9	0.194	0.473	89	45
1	12109560	12118864	RLOC_00003812	89	-	89.0	-78.9	0.147	0.419	48	44
1	12144433	12147247	RLOC_00003819	57	+	56.8	-56.8	0.112	0.374	115	117
1	12150666	12152460	RLOC_00003822	10	-	10.3	10.2	0.0218	0.172	89	81
1	12157053	12159125	RLOC_00003825	26	-	25.6	-17.0	0.467	0.723	80	67
1	12177672	12179628	RLOC_00003832	5	+	4.7	-0.8	0.662	0.848	174	113
1	12180482	12184528	RLOC_00003833	25	+	25.2	-12.2	0.941	0.971	131	104
1	12203929	12208769	RLOC_00003842	67	+	67.4	-60.1	0.105	0.365	97	77
1	12244559	12246231	RLOC_00003855	6	-	6.3	5.8	0.333	0.614	134	90
1	12256406	12260638	RLOC_00003857	38	+	37.8	-36.8	0.974	0.987	29	37
1	12264941	12266920	RLOC_00003859	7	+	7.3	0.8	0.154	0.428	336	300
1	12267840	12269978	RLOC_00003860	49	+	48.8	-47.4	0.0996	0.358	145	98
1	12349290	12351318	RLOC_00003882	3	-	3.4	-2.6	0.803	0.918	136	113
1	12351561	12355173	RLOC_00003883	11	+	11.1	-2.8	0.855	0.938	102	69
1	12355541	12359228	RLOC_00003884	11	+	11.4	4.9	0.768	0.904	209	202
1	12357697	12359014	RLOC_00003885	6	-	5.9	4.8	0.000149	0.00724	1167	1018
1	12359453	12361313	RLOC_00003886	20	-	19.6	-15.6	0.0736	0.309	60	45
1	12366829	12370046	RLOC_00003889	32	+	31.7	31.3	0.385	0.656	63	48
1	12369953	12371547	RLOC_00003890	2	-	2.4	0.2	0.932	0.968	794	519
1	12429845	12433236	RLOC_00003912	33	+	32.9	-20.3	0.105	0.366	80	60
1	12451428	12454692	RLOC_00003918	19	+	19.5	18.9	0.0649	0.294	134	125
1	12455668	12457639	RLOC_00003919	39	+	39.3	-20.6	0.88	0.948	32	40
1	12462786	12466093	RLOC_00003921	24	-	23.5	-18.5	0.862	0.941	71	68
1	12503359	12506177	RLOC_00003930	28	+	28.3	28.3	0.00399	0.0648	51	51
1	12520058	12524395	RLOC_00003935	50	+	49.9	44.9	0.264	0.547	88	69
1	12534394	12536158	RLOC_00003938	6	+	6.1	1.4	0.591	0.806	63	46
1	12550338	12552674	RLOC_00003941	7	+	6.7	-6.7	0.0255	0.188	150	136
1	12582129	12582822	RLOC_00003949	2	+	2.5	-0.4	0.323	0.604	298	211
1	12584277	12590228	RLOC_00003950	160	-	160.0	124.9	0.00807	0.1	269	181
1	12595109	12607157	RLOC_00003953	223	+	222.7	-215.3	0.582	0.8	63	48
1	12646650	12652646	RLOC_00003966	2	-	2.4	-0.8	0.801	0.918	74	75
1	12654926	12656605	RLOC_00003968	43	-	42.9	39.3	0.0206	0.168	45	52
1	12743562	12745659	RLOC_00003988	34	-	33.7	31.5	0.166	0.44	88	89
1	12748550	12750513	RLOC_00003990	5	-	4.9	-2.8	0.903	0.955	60	54
1	12840365	12850510	RLOC_00004034	8	+	7.6	-4.2	0.41	0.678	69	82
1	12867080	12868890	RLOC_00004040	8	+	8.2	-6.3	0.355	0.63	344	284
1	12890403	12892955	RLOC_00004048	27	+	26.7	-17.5	0.17	0.445	99	97
1	12977667	12979948	RLOC_00004072	14	+	14.0	13.6	0.67	0.851	146	137
1	13026205	13027725	RLOC_00004088	9	+	8.8	-1.6	0.24	0.523	201	156
1	13030552	13031375	RLOC_00004090	3	-	3.3	3.2	0.242	0.525	56	39
1	13039659	13042172	RLOC_00004094	25	+	25.0	19.6	0.738	0.888	74	53
1	13051156	13055093	RLOC_00004098	38	-	38.1	27.6	0.874	0.946	63	44
1	13071163	13074984	RLOC_00004103	12	+	12.1	7.2	0.293	0.574	50	47
1	13077825	13080265	RLOC_00004105	63	+	63.2	-50.3	0.0174	0.154	205	191
1	13115697	13117423	RLOC_00004114	13	-	13.2	7.6	0.579	0.798	58	38
1	13122081	13125328	RLOC_00004116	5	-	4.9	-2.2	0.924	0.965	359	464
1	13145598	13146870	RLOC_00004120	18	+	18.3	3.4	0.244	0.527	116	65
1	13156319	13158495	RLOC_00004124	31	+	31.3	28.6	0.0105	0.115	170	108
1	13208707	13210465	RLOC_00004135	2	+	2.2	2.0	0.489	0.74	1476	1142
1	13225207	13227428	RLOC_00004140	5	+	4.8	-1.0	0.0334	0.214	491	541
1	13277136	13280340	RLOC_00004149	30	-	29.8	-27.9	0.152	0.425	43	45
1	13450131	13453683	RLOC_00004181	49	+	49.3	-36.9	0.0735	0.308	83	106
1	13533167	13544015	RLOC_00004200	170	+	170.4	-163.3	0.0634	0.292	175	145
1	13669410	13671213	RLOC_00004221	14	+	14.1	13.2	0.271	0.554	114	74
1	13671781	13674242	RLOC_00004222	4	+	3.8	1.6	0.871	0.945	312	251
1	13696001	13698739	RLOC_00004228	20	-	20.0	20.0	0.384	0.655	126	44
1	13700764	13703654	RLOC_00004229	34	+	33.8	25.8	0.154	0.428	98	89
1	13700772	13703572	RLOC_00004230	120	-	120.3	69.0	0.000886	0.026	119	50
1	13898186	13900899	RLOC_00004279	8	-	8.1	2.2	0.195	0.474	288	298
1	14024633	14026951	RLOC_00004311	3	+	3.1	1.4	0.122	0.388	559	495
1	14027195	14030550	RLOC_00004312	10	-	9.7	-0.2	0.731	0.886	41	41
1	14158478	14161976	RLOC_00004342	5	+	5.0	-3.5	0.0764	0.314	1648	1094
1	15603537	15607955	RLOC_00004514	43	-	42.9	39.9	0.518	0.761	128	101
1	15650526	15652542	RLOC_00004521	5	-	5.3	-1.3	0.844	0.933	1320	866
1	15891280	15894640	RLOC_00004576	6	+	6.5	-0.5	0.857	0.939	47	68
1	15895196	15900105	RLOC_00004577	3	-	3.1	0.5	0.972	0.986	92	60
1	15936155	15938994	RLOC_00004581	27	+	27.5	18.0	0.00351	0.0603	67	61
1	15973053	15979952	RLOC_00004592	267	+	266.8	-181.7	0.0405	0.235	318	224
1	16125685	16129890	RLOC_00004628	8	+	7.9	3.0	0.687	0.861	5460	4790
1	16135629	16137550	RLOC_00004631	29	-	28.6	12.6	0.632	0.83	88	122
1	16228188	16231254	RLOC_00004646	51	-	50.7	-17.9	0.0412	0.236	95	83
1	16266552	16268945	RLOC_00004652	4	+	4.0	-1.7	0.0327	0.212	2103	1603
1	16275036	16278726	RLOC_00004655	12	-	12.3	-9.2	0.133	0.401	169	146
1	16397978	16399880	RLOC_00004677	40	-	39.9	38.9	2.39e-11	1.7e-08	456	374
1	16410371	16412736	RLOC_00004682	11	-	10.6	10.6	0.0353	0.22	70	71
1	16467297	16470813	RLOC_00004698	10	+	10.2	-8.2	0.13	0.398	524	467
1	16478141	16482880	RLOC_00004703	8	+	8.0	7.4	0.373	0.647	131	104
1	16484211	16486327	RLOC_00004704	8	+	7.5	5.2	0.128	0.395	181	164
1	16486090	16488466	RLOC_00004705	5	-	4.9	4.5	0.37	0.645	223	173
1	16575758	16576541	RLOC_00004728	6	+	5.7	-3.5	0.451	0.71	87	68
1	16616982	16622101	RLOC_00004738	7	+	7.0	-5.8	0.705	0.871	119	104
1	16620768	16624504	RLOC_00004739	39	-	39.1	-37.8	0.0893	0.34	88	61
1	16646690	16648692	RLOC_00004745	7	+	6.7	5.2	0.214	0.496	208	193
1	16654004	16656063	RLOC_00004748	9	+	8.9	-4.2	0.518	0.761	97	64
1	16708003	16709713	RLOC_00004760	3	-	3.1	-0.2	0.625	0.826	354	320
1	16834209	16838562	RLOC_00004793	25	-	24.8	20.1	0.862	0.941	164	95
1	16848277	16851271	RLOC_00004796	14	-	13.6	-6.2	0.156	0.43	793	558
1	16870220	16873427	RLOC_00004801	3	+	2.6	-2.4	0.0555	0.273	6309	5292
1	16892526	16896167	RLOC_00004806	14	+	14.0	11.1	0.872	0.945	86	85
1	16896651	16898645	RLOC_00004807	23	-	23.2	19.0	0.316	0.599	90	55
1	16907536	16909572	RLOC_00004808	6	-	6.0	3.0	0.354	0.63	195	183
1	16912125	16913641	RLOC_00004810	7	-	6.8	-0.9	0.74	0.89	83	62
1	16913993	16917053	RLOC_00004811	5	-	5.0	1.7	0.802	0.918	38	104
1	16923439	16924821	RLOC_00004812	6	+	5.9	-1.3	0.654	0.842	119	120
1	16926296	16929196	RLOC_00004813	21	+	21.0	-2.4	0.449	0.709	90	70
1	16939800	16942943	RLOC_00004815	16	+	16.4	6.9	0.601	0.813	77	58
1	16982796	16984515	RLOC_00004826	29	-	29.3	27.5	0.0064	0.0866	259	141
1	16999533	17001871	RLOC_00004832	24	+	23.9	-10.2	0.867	0.944	63	62
1	17009072	17011953	RLOC_00004836	9	+	8.9	8.0	0.223	0.506	278	245
1	17031210	17033316	RLOC_00004844	22	+	22.2	21.9	0.00728	0.0933	71	53
1	17065104	17069286	RLOC_00004852	22	+	21.8	-13.3	0.556	0.783	85	76
1	17074941	17076417	RLOC_00004854	8	-	7.6	4.4	0.214	0.496	144	256
1	17082876	17091405	RLOC_00004856	763	-	762.5	761.8	0.16	0.434	121	79
1	17095979	17098041	RLOC_00004861	16	-	15.7	13.8	0.16	0.435	54	45
1	17123825	17129705	RLOC_00004865	20	+	20.0	-1.4	0.934	0.969	279	211
1	17165111	17167924	RLOC_00004884	67	-	66.6	11.1	0.822	0.924	49	55
1	17169462	17171559	RLOC_00004885	15	-	15.4	-14.8	0.244	0.527	182	153
1	17172120	17177060	RLOC_00004886	20	-	19.9	17.5	0.0758	0.313	57	56
1	17179264	17183064	RLOC_00004888	132	+	131.7	123.2	2.94e-06	0.000433	751	319
1	17191379	17193333	RLOC_00004892	40	+	39.8	-22.9	0.729	0.885	259	228
1	17199313	17200841	RLOC_00004896	5	+	4.6	-3.9	0.913	0.959	89	54
1	17252877	17253937	RLOC_00004906	32	+	32.4	-27.5	0.241	0.525	48	35
1	17275889	17277839	RLOC_00004913	18	-	18.2	11.5	0.0646	0.294	37	34
1	17282748	17285749	RLOC_00004915	3	-	2.8	0.9	0.515	0.759	1356	1442
1	17295569	17296326	RLOC_00004917	15	+	15.4	-14.6	0.171	0.446	61	57
1	17297708	17298832	RLOC_00004919	6	-	6.3	-0.4	0.44	0.702	258	181
1	17306546	17308886	RLOC_00004922	46	+	46.3	43.8	0.933	0.969	34	27
1	17319118	17321202	RLOC_00004928	35	+	35.2	-1.2	0.0179	0.156	99	88
1	17319550	17323484	RLOC_00004929	7	-	7.2	6.8	0.0665	0.297	315	223
1	17330818	17332336	RLOC_00004933	4	+	4.3	0.7	0.973	0.986	106	89
1	17341737	17344836	RLOC_00004937	49	+	49.4	-41.6	0.0944	0.348	100	81
1	17351013	17353923	RLOC_00004942	26	+	25.8	-14.4	0.569	0.791	34	33
1	17382997	17383830	RLOC_00004950	5	+	4.6	-2.0	0.756	0.897	62	81
1	17395498	17397307	RLOC_00004958	4	-	3.8	-0.5	0.833	0.93	458	341
1	17424472	17427475	RLOC_00004969	66	+	65.6	-65.2	0.92	0.963	120	111
1	17432432	17435158	RLOC_00004972	8	+	8.2	3.9	0.413	0.68	131	53
1	17451516	17454461	RLOC_00004976	15	+	15.4	-10.7	0.495	0.744	220	165
1	17456986	17465195	RLOC_00004978	105	+	105.3	-99.7	0.862	0.941	93	95
1	17484283	17486585	RLOC_00004984	18	+	17.8	-14.4	0.372	0.646	82	70
1	17518046	17520129	RLOC_00004996	15	-	14.7	-2.4	0.871	0.945	104	114
1	17536620	17539719	RLOC_00005001	46	-	45.9	-43.2	0.95	0.975	47	50
1	17557090	17560331	RLOC_00005007	22	+	22.1	-21.3	0.0632	0.292	69	43
1	17560928	17562940	RLOC_00005008	8	-	7.7	2.5	0.652	0.842	147	180
1	17566566	17570516	RLOC_00005010	13	+	13.1	12.5	0.678	0.857	125	81
1	17611904	17612613	RLOC_00005029	6	+	5.7	5.5	0.47	0.725	50	39
1	17613013	17614984	RLOC_00005030	15	-	14.7	13.3	0.0327	0.212	123	107
1	17675364	17683629	RLOC_00005044	37	-	36.8	-15.6	0.269	0.552	84	76
1	17686989	17688859	RLOC_00005045	12	+	11.5	-8.9	0.0786	0.318	153	137
1	17716151	17721891	RLOC_00005052	46	-	46.5	-21.0	0.262	0.545	530	372
1	17769883	17773524	RLOC_00005062	32	-	32.4	29.6	0.279	0.561	61	77
1	17780487	17781798	RLOC_00005064	4	+	4.1	3.3	0.524	0.764	41	90
1	17781987	17784211	RLOC_00005065	12	+	11.8	8.8	0.0272	0.194	76	46
1	17786495	17789282	RLOC_00005068	7	-	6.8	6.4	0.57	0.792	117	89
1	17788768	17792404	RLOC_00005069	929	+	928.7	924.0	0.00198	0.0416	86	49
1	17798430	17802330	RLOC_00005074	14	+	13.5	12.7	0.322	0.603	50	42
1	17805760	17808993	RLOC_00005076	10	+	10.2	1.0	0.693	0.864	82	79
1	17808987	17812106	RLOC_00005077	5	-	5.3	-0.5	0.827	0.926	82	78
1	17847032	17848898	RLOC_00005086	6	+	6.4	4.5	0.0345	0.217	856	605
1	17854811	17855959	RLOC_00005089	6	-	5.8	-2.3	0.444	0.705	110	54
1	17867101	17868452	RLOC_00005093	4	+	3.5	-1.1	0.129	0.396	1156	888
1	17886035	17892632	RLOC_00005100	8	-	7.6	6.5	0.214	0.496	286	214
1	17895783	17898813	RLOC_00005101	5	-	5.1	-3.6	0.901	0.955	135	131
1	17902620	17906873	RLOC_00005103	7	-	6.7	0.5	0.798	0.917	41	51
1	17906870	17908534	RLOC_00005104	8	+	7.6	7.6	0.212	0.493	460	321
1	17908452	17910523	RLOC_00005105	7	-	7.2	6.6	0.379	0.652	404	309
1	17910778	17913636	RLOC_00005106	14	+	14.4	14.2	0.552	0.78	54	40
1	17917950	17921225	RLOC_00005108	13	+	12.7	1.2	0.603	0.814	73	65
1	17921885	17928954	RLOC_00005109	53	-	53.0	48.6	0.962	0.98	45	40
1	17940049	17942867	RLOC_00005112	28	+	28.4	-10.4	0.409	0.678	117	119
1	17945357	17951092	RLOC_00005114	309	+	308.7	-171.5	0.115	0.377	59	32
1	17953869	17957719	RLOC_00005117	45	-	44.7	-44.3	0.123	0.389	52	47
1	17965870	17970608	RLOC_00005123	16	+	15.9	11.8	0.295	0.577	225	221
1	17970610	17973402	RLOC_00005125	32	-	31.9	19.1	0.765	0.903	65	46
1	17973641	17976663	RLOC_00005126	21	-	20.9	-13.0	0.388	0.659	140	137
1	17981635	17983377	RLOC_00005128	54	-	54.3	54.0	0.035	0.219	290	174
1	17983533	17989163	RLOC_00005129	66	+	65.6	-59.0	0.599	0.812	78	42
1	17989104	17995326	RLOC_00005130	69	-	69.5	-65.8	0.374	0.648	74	86
1	18030705	18031608	RLOC_00005142	20	+	20.3	-15.0	0.0365	0.224	37	46
1	18035854	18039399	RLOC_00005144	9	+	8.8	-8.0	0.204	0.484	135	240
1	18035966	18039405	RLOC_00005145	28	-	28.1	-5.3	0.043	0.241	42	43
1	18043671	18047806	RLOC_00005147	14	-	13.6	-5.4	0.58	0.798	72	107
1	18059449	18061302	RLOC_00005151	7	-	6.9	2.6	0.039	0.23	680	528
1	18061355	18065051	RLOC_00005152	72	+	72.5	72.5	0.592	0.806	49	36
1	18064882	18068163	RLOC_00005153	7	-	7.2	-1.5	0.138	0.409	166	172
1	18068664	18071648	RLOC_00005154	5	-	5.3	1.6	0.734	0.887	154	121
1	18084696	18087934	RLOC_00005159	13	-	13.5	10.2	0.0177	0.156	143	124
1	18098094	18101767	RLOC_00005162	23	+	23.1	19.9	0.117	0.383	950	573
1	18106238	18110396	RLOC_00005165	29	+	28.7	3.3	0.0214	0.171	65	49
1	18132544	18134017	RLOC_00005175	6	+	5.8	0.3	0.226	0.51	65	50
1	18136665	18139060	RLOC_00005178	14	+	13.8	10.3	0.204	0.484	260	247
1	18139140	18149030	RLOC_00005179	165	-	165.3	162.6	0.304	0.586	62	64
1	18150466	18153369	RLOC_00005180	20	+	19.9	17.5	0.833	0.93	34	42
1	18176622	18182510	RLOC_00005189	105	-	105.0	-102.4	0.0217	0.172	373	275
1	18183047	18187566	RLOC_00005191	130	-	129.6	51.3	0.494	0.744	55	59
1	18215799	18219269	RLOC_00005200	29	+	29.5	-24.1	0.861	0.941	766	790
1	18234678	18237543	RLOC_00005207	13	+	12.7	-11.7	0.636	0.833	179	172
1	18251989	18264672	RLOC_00005211	168	+	167.6	162.8	0.188	0.464	76	57
1	18276642	18279532	RLOC_00005219	17	+	16.8	5.8	0.518	0.761	136	110
1	18282902	18285365	RLOC_00005221	14	+	13.7	-11.9	0.317	0.599	109	70
1	18283998	18286965	RLOC_00005222	102	-	101.6	101.2	0.000405	0.0153	336	174
1	18290941	18295905	RLOC_00005224	6	+	6.2	-6.0	0.35	0.627	67	81
1	18310427	18311714	RLOC_00005229	5	+	5.4	-2.0	0.662	0.848	76	57
1	18314099	18316861	RLOC_00005231	6	-	5.9	-0.0	0.969	0.984	129	79
1	18320461	18322818	RLOC_00005234	10	-	9.7	1.8	4.69e-05	0.00305	3510	1046
1	18326824	18328765	RLOC_00005235	7	+	7.4	1.0	0.25	0.532	133	104
1	18351323	18354634	RLOC_00005242	19	+	18.8	18.4	0.0653	0.295	52	32
1	18354743	18356988	RLOC_00005243	6	+	6.4	2.4	0.875	0.946	52	72
1	18355996	18360447	RLOC_00005244	20	-	19.7	15.5	0.197	0.476	217	162
1	18367589	18375494	RLOC_00005248	241	-	241.4	241.1	0.133	0.401	43	38
1	18377059	18379998	RLOC_00005250	14	-	13.8	-8.6	0.959	0.979	140	105
1	18380362	18386149	RLOC_00005251	48	-	47.9	-13.2	0.312	0.594	85	65
1	18391174	18394008	RLOC_00005255	30	-	30.1	29.9	0.163	0.437	43	32
1	18402121	18405620	RLOC_00005260	53	-	53.2	-52.1	0.148	0.42	110	68
1	18407399	18410022	RLOC_00005261	325	+	325.3	218.8	0.0925	0.345	60	49
1	18409653	18413040	RLOC_00005262	9	-	8.7	-2.0	0.149	0.421	228	191
1	18416473	18420111	RLOC_00005263	16	+	16.0	-11.6	0.0102	0.114	224	186
1	18428787	18430497	RLOC_00005266	3	-	3.5	2.6	0.99	0.994	78	42
1	18442881	18445350	RLOC_00005271	4	+	3.6	-1.2	0.741	0.89	66	66
1	18454843	18456619	RLOC_00005275	21	-	20.9	-11.1	0.406	0.676	72	50
1	18494064	18497318	RLOC_00005286	20	-	20.2	4.9	0.565	0.789	143	123
1	18500027	18504691	RLOC_00005288	22	-	22.2	16.7	0.0365	0.224	717	338
1	18504805	18506270	RLOC_00005289	73	+	73.2	70.4	4.44e-06	0.000608	350	209
1	18517556	18520624	RLOC_00005293	9	+	8.8	8.3	0.00128	0.032	894	526
1	18519075	18521913	RLOC_00005295	6	-	6.3	1.1	0.25	0.532	505	441
1	18522247	18539995	RLOC_00005296	438	-	438.3	172.3	0.665	0.85	38	33
1	18547373	18550110	RLOC_00005299	232	-	231.5	206.5	6.22e-05	0.00377	59	45
1	18561801	18566427	RLOC_00005306	7	+	6.7	1.4	0.826	0.926	58	57
1	18569500	18579175	RLOC_00005308	116	-	115.5	-113.5	0.427	0.693	42	38
1	18581997	18587256	RLOC_00005310	181	+	181.2	180.4	0.153	0.427	93	70
1	18591154	18598523	RLOC_00005312	85	-	84.8	60.5	0.454	0.712	375	265
1	18614200	18617155	RLOC_00005316	12	-	12.2	-11.5	0.000501	0.0176	644	595
1	18627410	18632039	RLOC_00005319	340	-	339.7	296.8	0.00123	0.0316	84	96
1	18637662	18639544	RLOC_00005322	82	-	82.4	71.5	0.000326	0.0131	614	230
1	18658507	18662052	RLOC_00005330	11	+	11.0	-10.9	0.0439	0.243	125	119
1	18672131	18677712	RLOC_00005334	55	+	54.5	52.6	0.255	0.537	32	37
1	18681912	18685968	RLOC_00005336	16	-	16.3	-14.8	0.0327	0.212	174	163
1	18685292	18687907	RLOC_00005337	20	+	20.1	-9.6	0.982	0.99	58	76
1	18687784	18690503	RLOC_00005339	13	-	13.3	-0.1	0.133	0.401	133	125
1	18693649	18697713	RLOC_00005341	122	+	122.2	-122.2	0.16	0.434	42	70
1	18701881	18704943	RLOC_00005343	5	+	4.7	4.5	0.248	0.53	306	288
1	18704163	18706589	RLOC_00005344	8	-	7.9	7.4	0.365	0.641	44	34
1	18724143	18728400	RLOC_00005349	53	-	53.1	46.8	0.204	0.484	109	87
1	18728633	18730498	RLOC_00005352	48	-	47.6	43.1	0.742	0.89	51	58
1	18737062	18739649	RLOC_00005355	20	-	19.8	-13.7	0.518	0.761	159	120
1	18750986	18753697	RLOC_00005358	45	-	45.2	39.8	0.966	0.982	35	29
1	18756223	18758595	RLOC_00005360	23	-	23.0	22.9	0.00398	0.0648	200	141
1	18770936	18774759	RLOC_00005363	8	+	8.3	-4.5	0.412	0.679	92	70
1	18774768	18777069	RLOC_00005365	16	-	16.3	-12.0	0.0534	0.267	113	131
1	18784461	18787824	RLOC_00005370	69	-	68.6	-46.9	0.0752	0.312	53	46
1	18795187	18802375	RLOC_00005373	108	+	107.5	-98.9	0.936	0.97	40	47
1	18802551	18803755	RLOC_00005374	14	+	14.0	12.3	0.0366	0.224	182	92
1	18807683	18815537	RLOC_00005376	847	+	846.6	846.6	0.0054	0.0775	66	53
1	18839046	18844595	RLOC_00005386	6	+	6.2	-3.8	0.673	0.853	91	48
1	18866142	18867533	RLOC_00005392	6	+	5.6	4.5	0.0351	0.219	661	411
1	18870058	18872974	RLOC_00005395	7	+	7.3	-6.3	0.0152	0.143	381	250
1	18877796	18880001	RLOC_00005397	29	-	29.3	29.3	0.0577	0.28	45	49
1	18926887	18931045	RLOC_00005413	85	+	85.2	79.3	0.221	0.504	370	477
1	18934278	18937717	RLOC_00005417	198	+	198.3	196.5	0.0634	0.292	309	237
1	18943446	18945812	RLOC_00005420	5	-	5.4	3.3	0.516	0.76	54	51
1	18949531	18951891	RLOC_00005422	9	+	9.2	5.5	0.0167	0.15	167	152
1	18953457	18955053	RLOC_00005423	7	-	7.3	6.8	0.515	0.759	50	33
1	18984280	18986653	RLOC_00005429	15	+	15.3	-14.5	5.59e-10	2.94e-07	1479	1230
1	19018925	19021807	RLOC_00005439	7	-	6.9	3.9	0.313	0.596	46	52
1	19044160	19047518	RLOC_00005445	110	+	110.0	102.3	0.61	0.819	58	44
1	19047835	19053535	RLOC_00005446	173	+	173.0	78.5	0.433	0.698	59	28
1	19051673	19053731	RLOC_00005447	3	-	3.5	3.4	0.00219	0.0444	5390	3756
1	19068240	19069855	RLOC_00005450	23	+	23.4	-23.0	0.0145	0.139	74	60
1	19097711	19101265	RLOC_00005457	17	-	17.1	4.7	0.23	0.514	327	219
1	19102790	19104933	RLOC_00005458	3	-	2.5	-1.8	0.944	0.972	227	154
1	19115550	19117554	RLOC_00005462	4	+	4.0	2.2	0.652	0.841	61	53
1	19119593	19122038	RLOC_00005465	9	-	9.2	-4.9	0.383	0.655	50	63
1	19122053	19126709	RLOC_00005466	21	-	20.9	-20.6	0.0677	0.298	266	218
1	19125576	19128307	RLOC_00005467	29	+	29.3	28.6	0.0416	0.237	42	50
1	19128055	19132335	RLOC_00005468	16	-	15.6	-14.0	0.0206	0.168	68	46
1	19132295	19135840	RLOC_00005470	15	+	14.8	1.2	0.863	0.941	60	47
1	19136213	19139989	RLOC_00005471	11	+	11.4	7.8	0.00288	0.053	46	41
1	19141259	19144323	RLOC_00005473	34	-	33.8	29.1	0.128	0.395	134	115
1	19152507	19154051	RLOC_00005476	8	+	8.1	8.0	0.0474	0.253	658	543
1	19154302	19158749	RLOC_00005477	153	+	153.3	-144.9	0.32	0.601	37	35
1	19158722	19161729	RLOC_00005478	5	-	4.8	1.1	0.903	0.955	295	195
1	19163842	19170458	RLOC_00005479	112	+	112.0	-110.0	0.0613	0.288	123	121
1	19175608	19180195	RLOC_00005482	3	-	2.6	1.4	0.954	0.977	102	118
1	19180757	19186549	RLOC_00005483	35	+	34.6	-28.8	0.967	0.983	59	54
1	19186397	19188795	RLOC_00005484	14	-	14.4	5.6	0.0182	0.157	129	141
1	19199332	19201707	RLOC_00005488	17	+	17.0	-7.4	0.106	0.367	94	78
1	19220235	19225797	RLOC_00005494	84	-	84.2	-83.7	0.507	0.754	99	70
1	19295819	19299171	RLOC_00005511	12	-	11.6	9.6	0.239	0.523	69	55
1	19305080	19307518	RLOC_00005513	8	+	7.8	1.9	0.887	0.95	141	110
1	19323054	19326918	RLOC_00005517	5	-	4.8	2.0	0.491	0.741	290	249
1	19333046	19336129	RLOC_00005519	17	-	16.9	-9.3	0.0988	0.357	613	132
1	19350313	19352791	RLOC_00005523	15	-	14.8	2.1	0.793	0.915	235	42
1	19383077	19385602	RLOC_00005533	69	-	69.2	-69.2	0.0523	0.265	159	106
1	19409687	19414765	RLOC_00005538	166	-	166.2	150.2	0.185	0.461	55	52
1	19434488	19439078	RLOC_00005546	14	+	13.6	-12.3	0.552	0.78	438	191
1	19439366	19443627	RLOC_00005547	15	-	14.7	1.9	0.963	0.981	51	85
1	19453379	19454704	RLOC_00005550	4	-	4.1	-1.6	0.00111	0.0297	1404	1130
1	19454798	19456499	RLOC_00005551	6	+	6.4	5.3	1.48e-06	0.000268	7391	4487
1	19467930	19472568	RLOC_00005556	165	-	164.8	-160.7	0.163	0.437	106	140
1	19474774	19476239	RLOC_00005557	5	-	4.8	2.6	6.61e-05	0.00396	1818	1464
1	19478052	19482875	RLOC_00005558	13	+	13.1	3.5	0.965	0.982	55	51
1	19484277	19487997	RLOC_00005559	30	+	29.7	-12.4	0.12	0.385	53	52
1	19489788	19493069	RLOC_00005562	192	-	192.2	190.5	0.0307	0.207	380	207
1	19496460	19497720	RLOC_00005566	10	+	10.4	9.9	0.182	0.458	65	56
1	19499145	19506309	RLOC_00005568	36	+	35.8	-33.4	0.0651	0.295	89	119
1	19508937	19511641	RLOC_00005570	9	+	9.1	-8.1	0.341	0.621	70	88
1	19514722	19518411	RLOC_00005572	4	+	4.2	2.6	0.474	0.728	2530	332
1	19520602	19525693	RLOC_00005573	4	+	4.5	0.8	0.955	0.978	156	72
1	19527821	19531443	RLOC_00005575	11	+	10.6	7.2	0.448	0.708	79	88
1	19559799	19565274	RLOC_00005583	34	-	34.4	33.2	0.453	0.712	313	248
1	19572731	19574057	RLOC_00005590	17	-	17.2	-4.7	0.51	0.755	66	55
1	19588996	19590288	RLOC_00005596	12	-	11.9	-11.9	0.0504	0.26	147	134
1	19590432	19592755	RLOC_00005597	17	+	16.8	16.5	0.142	0.413	110	103
1	19614930	19617611	RLOC_00005611	568	-	568.5	568.4	0.000161	0.00775	157	84
1	19619723	19620844	RLOC_00005613	5	+	4.7	-1.5	0.541	0.775	101	170
1	19640524	19641665	RLOC_00005618	6	+	6.3	5.8	0.718	0.879	98	69
1	19642465	19646561	RLOC_00005619	42	+	42.4	42.4	0.0427	0.24	871	801
1	19651171	19652825	RLOC_00005621	11	+	11.4	6.9	0.718	0.879	105	105
1	19658600	19663488	RLOC_00005623	67	+	66.6	-59.3	0.363	0.64	65	44
1	19669007	19671952	RLOC_00005628	183	-	182.9	176.9	0.0021	0.0434	267	136
1	19672468	19673652	RLOC_00005629	20	-	19.5	-19.5	0.034	0.215	40	29
1	19685544	19688028	RLOC_00005635	5	+	5.0	-1.2	0.551	0.78	454	395
1	19687688	19690553	RLOC_00005636	77	-	77.4	2.8	0.27	0.553	41	60
1	19706046	19706885	RLOC_00005640	5	+	5.4	-1.5	0.617	0.822	144	86
1	19711178	19713308	RLOC_00005644	23	+	22.6	-1.8	0.711	0.873	96	70
1	19737414	19740368	RLOC_00005651	2	+	2.2	-1.3	0.956	0.978	199	155
1	19744947	19747287	RLOC_00005653	12	-	12.4	-10.3	0.272	0.555	93	99
1	19760000	19761496	RLOC_00005658	7	-	7.5	4.8	0.535	0.771	65	61
1	19771915	19775818	RLOC_00005661	30	+	30.4	-29.7	0.555	0.783	65	71
1	19783343	19787363	RLOC_00005665	56	+	55.5	-48.7	0.475	0.728	57	56
1	19792738	19794787	RLOC_00005668	4	+	4.5	0.9	0.763	0.902	61	44
1	19820564	19822262	RLOC_00005677	17	-	16.9	-16.7	0.0137	0.135	95	109
1	19837109	19840370	RLOC_00005679	60	+	59.8	47.4	0.352	0.629	47	50
1	19844449	19847856	RLOC_00005681	9	+	8.9	-7.8	0.0759	0.313	707	667
1	19849691	19851934	RLOC_00005683	8	-	7.6	-5.6	0.562	0.787	82	75
1	19854560	19857138	RLOC_00005685	7	-	6.8	-4.0	0.357	0.633	567	488
1	19864694	19867389	RLOC_00005690	27	-	27.0	-24.9	0.506	0.753	88	103
1	19871115	19873804	RLOC_00005693	52	+	52.1	45.8	0.0229	0.177	47	35
1	19879430	19882975	RLOC_00005694	58	+	57.7	-54.4	0.00256	0.0485	55	50
1	19883919	19888413	RLOC_00005695	8	-	7.5	-5.9	0.409	0.678	120	96
1	19890934	19893504	RLOC_00005696	4	-	4.2	-1.5	0.645	0.838	156	153
1	19912960	19916686	RLOC_00005704	18	-	18.0	-17.4	0.242	0.526	55	33
1	19924666	19926713	RLOC_00005706	6	+	6.1	-3.5	0.991	0.995	173	189
1	19934986	19941212	RLOC_00005710	15	+	14.9	11.2	0.497	0.746	30	36
1	19945810	19951729	RLOC_00005711	119	+	119.2	-104.0	0.559	0.784	41	31
1	19947629	19956804	RLOC_00005712	1042	-	1042.3	-403.9	0.00339	0.0591	95	51
1	19962769	19964712	RLOC_00005715	8	-	8.4	5.6	0.483	0.735	184	132
1	19966923	19969757	RLOC_00005717	19	-	19.5	-13.8	0.761	0.901	112	115
1	19970559	19975337	RLOC_00005719	307	-	307.5	306.3	0.00679	0.0885	96	99
1	19976354	19978048	RLOC_00005720	1	-	1.4	0.2	0.898	0.954	65	53
1	19978100	19980125	RLOC_00005721	8	+	8.3	8.1	0.646	0.838	37	32
1	19984541	19986112	RLOC_00005727	2	-	2.4	1.7	0.731	0.886	179	139
1	19987109	19991214	RLOC_00005728	6	+	6.2	6.0	0.357	0.633	99	84
1	19991270	19993458	RLOC_00005729	10	-	9.8	9.4	0.0252	0.187	268	243
1	19996204	20000782	RLOC_00005730	9	+	9.5	6.5	0.936	0.97	51	62
1	20026015	20028756	RLOC_00005744	330	-	329.5	329.5	0.00137	0.0331	54	33
1	20036565	20039301	RLOC_00005748	27	+	26.6	26.4	0.0102	0.114	535	460
1	20061404	20065713	RLOC_00005755	6	+	6.3	-2.5	0.266	0.548	84	111
1	20065393	20068500	RLOC_00005756	11	-	11.2	-10.3	0.174	0.45	354	314
1	20068964	20071171	RLOC_00005757	7	-	7.2	0.8	0.771	0.905	39	42
1	20073972	20079022	RLOC_00005759	523	-	522.8	519.9	0.107	0.369	75	76
1	20081643	20084551	RLOC_00005761	24	+	24.4	-22.8	0.279	0.561	109	93
1	20101298	20103690	RLOC_00005768	10	+	9.7	7.0	0.933	0.969	229	172
1	20103755	20106077	RLOC_00005769	9	-	9.0	-8.6	0.215	0.497	192	160
1	20111930	20113960	RLOC_00005772	8	+	8.3	1.1	0.992	0.995	288	106
1	20114919	20118585	RLOC_00005773	197	+	197.4	194.5	0.219	0.501	134	95
1	20119505	20120480	RLOC_00005774	4	+	3.7	2.4	0.563	0.788	117	32
1	20124705	20126588	RLOC_00005776	8	+	7.5	-2.5	0.972	0.986	287	106
1	20127478	20131065	RLOC_00005777	197	+	197.4	194.5	0.24	0.524	134	95
1	20132070	20133045	RLOC_00005778	4	+	3.7	2.4	0.55	0.78	117	32
1	20134843	20137013	RLOC_00005779	85	+	85.2	75.6	0.108	0.37	276	217
1	20158554	20160872	RLOC_00005790	21	-	20.6	-5.5	0.799	0.917	351	310
1	20167593	20169762	RLOC_00005792	6	+	6.1	6.1	0.14	0.411	166	175
1	20169738	20173949	RLOC_00005793	93	-	93.0	-65.3	0.346	0.625	136	59
1	20180609	20182374	RLOC_00005795	3	+	3.1	0.6	0.935	0.97	109	76
1	20183544	20187096	RLOC_00005797	11	-	10.7	-10.7	0.0541	0.27	214	169
1	20189471	20191900	RLOC_00005798	12	+	11.7	-9.4	0.077	0.314	76	48
1	20194711	20199193	RLOC_00005800	54	-	53.9	-41.7	0.0869	0.335	375	403
1	20201797	20204431	RLOC_00005802	12	+	11.9	-1.0	0.731	0.886	80	78
1	20210800	20214041	RLOC_00005804	10	+	10.3	6.6	0.886	0.95	254	158
1	20213888	20215277	RLOC_00005805	7	-	6.7	-6.7	0.425	0.69	43	55
1	20215432	20218699	RLOC_00005806	83	+	82.8	76.0	0.313	0.595	34	32
1	20221004	20226055	RLOC_00005808	39	-	38.8	-38.8	0.0357	0.221	47	55
1	20241225	20242665	RLOC_00005812	7	+	7.0	-6.1	0.578	0.797	68	66
1	20246025	20250356	RLOC_00005815	42	-	41.9	-31.1	0.0655	0.295	32	42
1	20254937	20256688	RLOC_00005818	18	+	17.9	14.4	0.0373	0.226	54	60
1	20256916	20262279	RLOC_00005819	128	+	127.6	-118.3	0.027	0.194	479	419
1	20268473	20270140	RLOC_00005822	6	-	6.4	6.2	0.195	0.473	116	106
1	20275533	20277981	RLOC_00005825	25	-	24.6	-23.6	0.178	0.454	144	177
1	20283416	20293355	RLOC_00005827	857	+	856.9	855.9	0.00222	0.0447	199	159
1	20293138	20297257	RLOC_00005830	17	-	16.6	16.0	0.256	0.537	62	65
1	20304514	20307110	RLOC_00005834	16	-	15.9	12.6	0.888	0.95	60	57
1	20309472	20310850	RLOC_00005836	1	-	1.4	-0.6	0.715	0.876	3041	2199
1	20340561	20343547	RLOC_00005843	23	-	23.4	-15.7	0.827	0.926	88	84
1	20350122	20358026	RLOC_00005846	101	+	101.4	12.2	0.589	0.804	90	66
1	20356953	20357879	RLOC_00005847	17	-	16.7	15.3	0.0723	0.307	672	418
1	20363302	20366140	RLOC_00005849	6	+	5.5	5.0	0.934	0.969	336	271
1	20389346	20391147	RLOC_00005856	16	+	15.6	15.6	9.73e-07	0.000191	471	504
1	20393663	20397295	RLOC_00005859	125	-	125.5	120.9	0.0439	0.243	117	84
1	20401356	20403166	RLOC_00005861	7	-	6.7	-6.6	0.0233	0.178	558	453
1	20414315	20415287	RLOC_00005868	3	-	2.8	-2.3	0.507	0.754	188	145
1	20416657	20421156	RLOC_00005871	8	-	8.2	0.1	0.681	0.857	57	40
1	20424331	20430220	RLOC_00005874	169	+	169.1	-167.0	0.422	0.688	62	55
1	20430601	20432031	RLOC_00005875	28	+	28.0	23.6	0.121	0.387	195	145
1	20433846	20437349	RLOC_00005877	208	+	207.8	-207.8	0.0132	0.133	67	55
1	20439369	20445022	RLOC_00005879	64	+	64.0	61.7	7.99e-07	0.000163	1815	831
1	20447156	20450963	RLOC_00005881	221	+	220.8	219.5	0.0311	0.209	79	66
1	20451082	20452699	RLOC_00005882	7	+	7.3	-2.3	0.739	0.889	101	77
1	20458951	20460647	RLOC_00005887	2	+	1.8	-0.8	0.621	0.824	59	80
1	20470677	20475202	RLOC_00005890	69	+	69.1	-67.5	0.0496	0.258	89	84
1	20511330	20513691	RLOC_00005906	2	+	2.5	0.6	0.964	0.982	74	55
1	20514625	20516551	RLOC_00005907	34	+	33.8	31.1	0.0345	0.217	147	131
1	20525635	20530468	RLOC_00005909	6	+	6.3	3.1	0.416	0.683	32	65
1	20554360	20558628	RLOC_00005917	16	+	16.4	6.6	0.0452	0.246	83	80
1	20560196	20563581	RLOC_00005919	27	-	27.1	27.1	0.374	0.648	72	50
1	20572326	20574364	RLOC_00005922	9	-	9.0	3.3	0.541	0.775	114	114
1	20574473	20577351	RLOC_00005923	7	+	7.4	-4.2	0.347	0.626	51	43
1	20577372	20579059	RLOC_00005924	39	-	39.0	-25.9	0.0727	0.307	79	57
1	20577376	20580010	RLOC_00005925	11	+	10.7	1.5	0.881	0.948	118	118
1	20580285	20588304	RLOC_00005926	1363	+	1363.3	-1362.2	0.0442	0.244	28	27
1	20588355	20589251	RLOC_00005930	5	+	5.1	2.6	0.835	0.93	75	52
1	20597711	20598747	RLOC_00005933	19	-	18.8	-11.0	0.0432	0.242	107	118
1	20614572	20616525	RLOC_00005939	9	+	8.6	-7.6	0.798	0.917	286	188
1	20629697	20633007	RLOC_00005946	7	+	7.2	-7.0	0.292	0.574	113	101
1	20637379	20649102	RLOC_00005948	90	+	90.3	70.0	0.792	0.914	46	44
1	20648089	20649029	RLOC_00005949	2	-	1.8	-1.0	0.227	0.51	1103	1191
1	20651813	20653764	RLOC_00005950	27	+	26.7	13.8	0.482	0.735	72	48
1	20653739	20665110	RLOC_00005951	56	-	56.4	-56.4	0.0489	0.256	60	39
1	20666165	20668850	RLOC_00005952	6	-	6.1	4.3	0.184	0.461	285	236
1	20673767	20676449	RLOC_00005954	115	+	114.9	114.9	0.00609	0.0838	97	62
1	20703902	20707106	RLOC_00005962	20	-	20.2	18.7	0.71	0.872	73	105
1	20707306	20709027	RLOC_00005963	16	+	16.4	6.5	0.967	0.983	74	60
1	20711443	20715593	RLOC_00005965	28	+	28.3	-28.0	0.245	0.529	522	449
1	20715562	20719261	RLOC_00005966	18	-	18.4	-16.2	0.077	0.314	602	443
1	20719472	20722856	RLOC_00005967	15	+	15.5	-0.0	0.453	0.712	78	42
1	20723278	20725747	RLOC_00005968	8	+	8.3	-4.7	0.633	0.831	44	52
1	20725469	20728091	RLOC_00005969	4	-	4.3	-0.7	0.769	0.904	94	87
1	20729124	20731356	RLOC_00005971	18	-	18.0	3.3	0.805	0.918	95	48
1	20787015	20791194	RLOC_00005985	26	-	25.9	21.3	0.192	0.47	34	42
1	20802496	20803610	RLOC_00005991	2	-	2.3	1.7	2.51e-05	0.00194	13895	9065
1	20803631	20807947	RLOC_00005993	51	-	51.4	50.0	0.186	0.462	341	323
1	20808198	20813061	RLOC_00005994	34	-	33.9	-33.7	0.0717	0.305	35	38
1	20856481	20859475	RLOC_00006006	587	-	587.2	587.2	0.000117	0.00618	126	109
1	20860506	20867780	RLOC_00006007	341	+	341.2	336.4	0.211	0.493	63	71
1	20873424	20876346	RLOC_00006009	2	+	1.6	-0.8	0.819	0.923	148	145
1	20876503	20880260	RLOC_00006010	72	+	72.1	-72.1	0.034	0.215	65	55
1	20879400	20893248	RLOC_00006011	135	-	135.2	121.3	0.272	0.555	65	88
1	20898352	20901184	RLOC_00006015	49	-	49.1	-47.4	0.406	0.676	50	29
1	20901325	20902921	RLOC_00006016	5	+	5.2	2.8	0.983	0.99	89	61
1	20903052	20910952	RLOC_00006017	340	+	340.4	-48.8	0.0271	0.194	158	134
1	20912114	20913597	RLOC_00006019	11	+	11.0	-9.0	0.384	0.655	115	141
1	20918678	20922786	RLOC_00006021	11	+	11.0	10.3	0.423	0.689	39	27
1	20927557	20930185	RLOC_00006027	4	-	4.5	0.3	0.419	0.685	311	274
1	20944111	20949323	RLOC_00006032	330	+	330.1	91.2	0.000617	0.0202	89	44
1	20962569	20963546	RLOC_00006037	2	+	2.2	-0.1	0.0104	0.115	1688	1346
1	20963682	20966468	RLOC_00006038	13	+	13.3	12.6	0.682	0.858	88	82
1	20967651	20971742	RLOC_00006040	19	-	19.0	16.1	0.0408	0.236	2149	1688
1	20984272	20986952	RLOC_00006046	6	-	6.0	1.2	0.661	0.848	262	126
1	21022539	21028066	RLOC_00006053	113	-	113.5	-14.5	0.663	0.849	66	49
1	21024481	21025902	RLOC_00006054	11	+	10.5	10.5	0.000919	0.0265	78	49
1	21028136	21030684	RLOC_00006055	7	+	7.4	-1.6	0.78	0.91	260	247
1	21030781	21032229	RLOC_00006056	5	+	5.0	3.9	0.00108	0.029	645	576
1	21042950	21044998	RLOC_00006058	6	+	5.6	3.2	0.738	0.889	2252	1435
1	21072811	21074903	RLOC_00006071	15	-	15.0	4.1	0.00418	0.0666	2569	1969
1	21075258	21078826	RLOC_00006072	11	+	10.8	-0.5	0.719	0.879	39	31
1	21085547	21088581	RLOC_00006075	39	-	39.2	39.0	0.000253	0.0109	565	457
1	21089564	21092709	RLOC_00006076	7	-	7.3	7.0	0.165	0.438	495	391
1	21141632	21144458	RLOC_00006091	12	+	11.5	-9.7	0.102	0.361	288	299
1	21146238	21150262	RLOC_00006092	3	+	3.2	-2.7	0.841	0.932	55	62
1	21159728	21174311	RLOC_00006095	699	+	699.5	-333.3	0.0372	0.226	356	334
1	21192136	21195190	RLOC_00006102	40	+	39.9	38.3	0.628	0.827	65	43
1	21198003	21199126	RLOC_00006104	5	-	4.7	4.7	0.0611	0.288	848	419
1	21201940	21204856	RLOC_00006105	16	-	15.9	14.2	0.112	0.374	61	56
1	21206908	21209699	RLOC_00006106	28	+	28.4	-2.0	0.239	0.523	210	101
1	21211718	21214562	RLOC_00006109	13	+	12.7	9.3	0.0794	0.319	43	37
1	21253696	21258836	RLOC_00006119	51	+	50.7	-25.2	0.19	0.468	172	123
1	21263343	21266469	RLOC_00006123	5	-	4.6	-3.7	0.23	0.514	58	43
1	21309260	21311514	RLOC_00006207	104	-	104.3	99.4	0.0454	0.247	66	52
1	21337107	21339167	RLOC_00006215	9	-	8.6	3.5	0.699	0.868	48	48
1	21342626	21344804	RLOC_00006217	5	+	4.8	1.4	0.993	0.995	86	81
1	21355477	21356647	RLOC_00006221	2	+	2.2	-1.5	0.647	0.838	1071	774
1	21362358	21364749	RLOC_00006223	5	-	4.8	-2.1	0.378	0.651	248	266
1	21377319	21380382	RLOC_00006227	5	+	4.5	-3.1	0.568	0.791	991	797
1	21393076	21394986	RLOC_00006232	12	+	12.3	11.3	0.0106	0.116	116	70
1	21395095	21398300	RLOC_00006233	11	+	11.0	-10.0	0.795	0.916	156	126
1	21429825	21430910	RLOC_00006246	2	-	2.2	-1.1	0.663	0.849	978	706
1	21431050	21436329	RLOC_00006247	170	-	170.2	170.0	0.335	0.615	62	52
1	21441178	21443036	RLOC_00006251	13	-	13.0	-13.0	0.029	0.2	79	96
1	21463984	21468525	RLOC_00006256	20	-	20.3	-15.2	0.872	0.945	163	174
1	21489248	21501890	RLOC_00006262	195	-	195.1	-195.0	0.177	0.453	31	27
1	21504298	21507679	RLOC_00006264	56	-	55.6	-40.7	0.0105	0.115	287	241
1	21512331	21514189	RLOC_00006266	7	-	6.6	1.8	0.902	0.955	82	99
1	21515404	21518270	RLOC_00006267	9	-	8.7	3.5	0.35	0.627	51	51
1	21537576	21540038	RLOC_00006275	25	-	24.5	22.4	0.544	0.777	152	100
1	21548116	21553266	RLOC_00006277	74	-	74.3	-70.2	0.112	0.373	94	72
1	21566056	21579249	RLOC_00006283	303	+	302.7	-293.7	0.195	0.474	35	43
1	21579621	21581165	RLOC_00006284	29	-	28.9	27.1	0.366	0.642	89	73
1	21587059	21601740	RLOC_00006289	581	-	581.3	579.9	0.24	0.524	46	51
1	21611802	21614188	RLOC_00006292	13	-	13.3	3.7	0.136	0.406	535	292
1	21620301	21622611	RLOC_00006297	17	-	16.7	-15.3	0.36	0.637	62	58
1	21623622	21626404	RLOC_00006298	7	-	6.6	0.5	0.585	0.802	972	775
1	21662844	21667721	RLOC_00006305	16	-	15.8	-15.6	0.203	0.482	36	39
1	21676387	21680519	RLOC_00006306	23	+	23.1	21.7	0.468	0.723	243	199
1	21688934	21690290	RLOC_00006308	13	+	12.8	-9.9	0.195	0.474	457	302
1	21713829	21717378	RLOC_00006315	5	-	4.9	2.7	0.587	0.803	96	103
1	21729912	21738846	RLOC_00006320	36	+	36.5	-27.5	0.419	0.685	41	49
1	21742941	21744023	RLOC_00006321	196	-	196.1	196.1	0.00107	0.029	44	38
1	21746237	21766048	RLOC_00006322	1847	+	1846.5	-1398.6	0.0127	0.129	90	99
1	21769673	21771303	RLOC_00006325	4	-	4.4	-2.3	0.193	0.472	1831	1162
1	21780118	21802054	RLOC_00006328	708	+	708.4	470.9	0.193	0.473	338	327
1	21805931	21807496	RLOC_00006331	4	-	4.4	-2.3	0.199	0.479	1831	1162
1	21816333	21820868	RLOC_00006334	276	+	275.6	271.1	0.0024	0.0468	157	160
1	21827946	21838312	RLOC_00006336	947	+	947.0	942.6	3.91e-06	0.000551	180	171
1	21842189	21843819	RLOC_00006339	4	-	4.4	-2.3	0.188	0.465	1831	1162
1	21861281	21866215	RLOC_00006346	33	+	33.3	31.7	0.588	0.803	42	41
1	21884013	21886049	RLOC_00006352	36	+	35.7	-35.2	0.193	0.472	72	88
1	21893141	21901086	RLOC_00006355	4	+	4.4	-1.8	0.716	0.876	164	121
1	21936277	21938001	RLOC_00006366	12	+	11.6	6.8	0.315	0.598	199	141
1	21938366	21940450	RLOC_00006367	24	+	23.6	11.4	0.378	0.651	36	34
1	21967985	21972503	RLOC_00006374	201	+	200.8	190.5	0.211	0.493	30	27
1	21979266	21984504	RLOC_00006375	38	+	38.5	-38.2	0.102	0.361	138	129
1	21984383	21990286	RLOC_00006376	5	-	5.2	-3.4	0.507	0.754	52	47
1	22011304	22020400	RLOC_00006383	122	+	122.0	115.1	0.603	0.814	52	39
1	22020432	22022570	RLOC_00006384	4	-	3.5	-2.5	0.282	0.564	124	111
1	22026479	22030554	RLOC_00006387	816	+	816.0	813.0	9.45e-06	0.001	82	36
1	22034422	22040126	RLOC_00006392	17	+	17.1	15.4	0.395	0.665	259	307
1	22043642	22051114	RLOC_00006395	167	+	166.8	-161.2	0.878	0.947	39	42
1	22051132	22053962	RLOC_00006396	16	+	16.3	16.2	0.146	0.418	278	321
1	22053854	22057267	RLOC_00006397	27	-	26.9	21.1	0.199	0.479	44	30
1	22090216	22094802	RLOC_00006408	61	-	61.1	60.4	0.492	0.742	486	301
1	22095250	22096624	RLOC_00006409	6	-	6.4	-0.9	0.323	0.605	384	231
1	22140807	22149604	RLOC_00006416	107	-	107.5	61.6	0.0406	0.235	129	111
1	22176933	22181740	RLOC_00006424	69	-	68.7	-43.3	0.377	0.65	98	84
1	22188040	22191560	RLOC_00006426	8	-	8.3	-7.1	0.176	0.451	88	59
1	22192759	22195433	RLOC_00006427	7	+	7.0	3.7	0.888	0.95	124	112
1	22197910	22205356	RLOC_00006429	60	-	60.0	-59.3	0.827	0.927	67	88
1	22218730	22221433	RLOC_00006435	133	-	133.1	-112.1	0.282	0.564	35	46
1	22261724	22264414	RLOC_00006452	8	+	7.8	-7.3	0.2	0.48	85	77
1	22264372	22266162	RLOC_00006454	3	-	2.6	1.5	0.549	0.78	52	42
1	22266415	22269258	RLOC_00006455	77	-	77.3	-73.7	0.0064	0.0866	51	45
1	22285416	22290356	RLOC_00006461	428	-	428.5	-428.4	0.0243	0.182	62	49
1	22305778	22308296	RLOC_00006471	39	-	38.8	-26.5	0.643	0.837	141	115
1	22324436	22327359	RLOC_00006477	38	-	37.7	33.4	0.228	0.512	55	60
1	22339808	22342354	RLOC_00006483	3	+	3.3	1.2	0.796	0.916	57	39
1	22342289	22343269	RLOC_00006484	5	-	5.4	-0.7	0.674	0.853	140	87
1	22354697	22356875	RLOC_00006489	18	-	17.6	17.2	0.0816	0.323	234	215
1	22368939	22372223	RLOC_00006496	11	-	11.0	9.4	0.0236	0.179	216	210
1	22383392	22387853	RLOC_00006499	8	-	8.3	0.5	0.53	0.767	118	100
1	22388474	22391237	RLOC_00006500	15	-	14.9	-11.8	0.172	0.448	50	56
1	22409297	22410854	RLOC_00006509	5	+	5.2	1.5	0.543	0.776	254	194
1	22423893	22428066	RLOC_00006512	21	+	21.1	11.9	0.61	0.819	77	73
1	22439062	22442221	RLOC_00006517	8	-	8.3	-7.4	0.333	0.614	200	251
1	22444391	22446693	RLOC_00006518	5	+	5.3	-2.5	0.0362	0.223	11778	6634
1	22461911	22465433	RLOC_00006526	412	-	412.0	411.5	0.0305	0.206	56	64
1	22462091	22463014	RLOC_00006527	14	+	14.3	-13.9	0.0156	0.146	49	106
1	22465517	22477846	RLOC_00006528	223	-	222.8	-156.4	0.796	0.916	135	88
1	22483103	22485969	RLOC_00006530	11	+	11.0	-8.7	0.189	0.466	52	57
1	22508518	22512333	RLOC_00006540	10	-	10.2	2.7	0.151	0.423	72	81
1	22542401	22545661	RLOC_00006547	7	+	7.0	-5.6	0.439	0.702	139	109
1	22551270	22554684	RLOC_00006551	35	+	35.1	34.4	0.0754	0.312	45	66
1	22555704	22560842	RLOC_00006552	38	+	38.4	-29.0	0.743	0.89	121	132
1	22581354	22585276	RLOC_00006558	15	+	14.8	-8.3	0.941	0.971	40	34
1	22585751	22588969	RLOC_00006559	11	+	10.6	6.8	0.494	0.744	211	218
1	22607432	22612036	RLOC_00006565	125	-	124.7	-124.3	0.0729	0.307	77	66
1	22637626	22650079	RLOC_00006573	1273	-	1272.9	1270.6	0.14	0.411	34	47
1	22699714	22701465	RLOC_00006588	3	+	2.6	2.2	8.74e-05	0.00499	22436	14936
1	22718461	22719535	RLOC_00006598	8	-	8.1	-7.4	0.0914	0.344	198	116
1	22720559	22723152	RLOC_00006600	79	-	79.1	-29.3	0.673	0.853	166	94
1	22737474	22739443	RLOC_00006607	16	+	16.0	-8.0	0.34	0.621	126	139
1	22753601	22756371	RLOC_00006615	38	-	38.4	12.3	0.613	0.819	91	74
1	22769363	22772767	RLOC_00006618	45	+	45.0	45.0	0.189	0.467	81	74
1	22782426	22786942	RLOC_00006623	9	-	8.7	7.2	0.624	0.826	43	46
1	22793169	22794714	RLOC_00006627	8	-	8.2	7.7	0.708	0.871	121	95
1	22798020	22801416	RLOC_00006628	35	-	34.9	-34.4	0.0401	0.234	306	278
1	22810110	22812677	RLOC_00006631	10	+	10.0	-6.3	0.423	0.689	93	103
1	22812572	22814162	RLOC_00006632	3	-	2.6	2.3	0.605	0.815	254	210
1	22814313	22816880	RLOC_00006633	103	+	102.7	101.5	0.000118	0.00618	340	241
1	22862843	22866635	RLOC_00006643	249	-	248.5	209.5	0.0532	0.267	80	69
1	22867688	22871358	RLOC_00006646	67	-	67.0	65.1	0.278	0.56	89	61
1	22882083	22885115	RLOC_00006647	8	-	8.1	-7.7	0.164	0.438	121	104
1	22911052	22914142	RLOC_00006656	87	+	87.4	74.8	0.0741	0.309	64	40
1	22919486	22924029	RLOC_00006660	7	+	7.0	-5.6	0.591	0.806	102	133
1	22931621	22934549	RLOC_00006664	17	+	16.7	-15.9	0.852	0.936	222	194
1	22975529	22977885	RLOC_00006681	6	-	6.2	-3.1	0.319	0.601	422	225
1	22980933	22984391	RLOC_00006683	8	-	7.7	-5.8	0.317	0.599	43	44
1	22994439	22999959	RLOC_00006690	234	-	233.9	59.3	0.000388	0.0148	99	100
1	23032346	23039763	RLOC_00006702	151	-	150.7	-148.8	0.741	0.89	28	35
1	23046767	23050337	RLOC_00006705	9	+	9.1	7.4	0.751	0.895	47	39
1	23082140	23087118	RLOC_00006713	4	+	3.7	0.2	0.0371	0.225	2049	1516
1	23084292	23087141	RLOC_00006714	26	-	26.5	5.5	0.00439	0.0692	312	191
1	23100118	23101335	RLOC_00006718	31	-	31.3	-31.1	0.0838	0.328	46	38
1	23105904	23109534	RLOC_00006720	11	-	11.5	-11.2	0.349	0.627	117	83
1	23128647	23129840	RLOC_00006724	7	+	7.4	1.9	0.0813	0.322	635	659
1	23131927	23133507	RLOC_00006726	34	+	34.5	0.1	0.639	0.834	46	26
1	23136279	23137358	RLOC_00006727	3	-	3.4	-3.3	4.53e-06	0.000612	2575	2172
1	23179450	23185151	RLOC_00006739	116	+	115.8	-39.7	0.364	0.64	54	57
1	23192145	23195111	RLOC_00006742	15	+	14.8	-5.6	0.505	0.753	72	90
1	23199611	23203823	RLOC_00006744	35	+	35.1	34.9	0.068	0.298	126	150
1	23223729	23227180	RLOC_00006751	41	-	41.4	4.0	0.113	0.375	45	38
1	23230921	23233543	RLOC_00006755	9	+	9.5	5.8	0.177	0.452	91	77
1	23233127	23236528	RLOC_00006756	5	-	4.5	-3.6	0.231	0.515	1210	1085
1	23249144	23251195	RLOC_00006760	6	-	6.2	3.5	0.928	0.967	245	224
1	23252139	23253771	RLOC_00006761	21	+	20.8	-8.0	0.743	0.89	63	102
1	23253679	23264401	RLOC_00006763	1522	-	1522.2	1521.5	0.000729	0.0224	193	149
1	23271589	23274328	RLOC_00006769	112	-	111.7	109.0	0.0101	0.113	81	40
1	23291905	23295564	RLOC_00006772	159	+	159.4	146.9	0.118	0.384	41	29
1	23316712	23320427	RLOC_00006783	11	-	10.6	10.3	0.616	0.821	98	102
1	23342210	23344120	RLOC_00006790	5	+	5.0	1.3	0.868	0.944	153	166
1	23347560	23352831	RLOC_00006791	38	-	38.0	-22.1	0.00908	0.107	73	63
1	23387573	23392856	RLOC_00006800	250	-	250.0	-230.4	0.171	0.447	66	49
1	23404687	23408119	RLOC_00006803	15	+	14.7	-5.3	0.0901	0.341	93	68
1	23408772	23411145	RLOC_00006804	9	-	9.4	4.4	0.241	0.525	66	76
1	23425353	23427456	RLOC_00006810	14	+	13.6	-0.9	0.0459	0.248	93	100
1	23427404	23429652	RLOC_00006811	2	-	1.6	0.5	0.891	0.951	50	59
1	23448811	23450530	RLOC_00006817	8	+	8.3	-0.2	0.552	0.78	49	50
1	23455679	23458928	RLOC_00006819	10	-	9.7	-9.0	0.994	0.996	42	35
1	23466679	23469289	RLOC_00006824	5	-	5.2	-2.7	0.93	0.968	62	70
1	23469517	23475517	RLOC_00006825	161	-	161.0	-160.4	0.405	0.675	167	126
1	23498469	23502316	RLOC_00006834	255	-	255.2	188.3	0.00402	0.0649	43	48
1	23515679	23518960	RLOC_00006840	12	+	11.5	5.5	0.243	0.527	49	35
1	23522448	23526832	RLOC_00006841	23	+	22.5	18.2	0.821	0.924	45	52
1	23534945	23536506	RLOC_00006843	5	+	5.3	1.5	0.741	0.89	52	54
1	23536465	23539244	RLOC_00006844	11	-	11.4	-11.4	0.643	0.837	37	20
1	23555398	23558917	RLOC_00006847	51	+	51.5	-51.0	0.0664	0.297	83	82
1	23583195	23585784	RLOC_00006860	6	-	5.9	-5.9	0.149	0.421	100	84
1	23603790	23607275	RLOC_00006865	11	-	11.3	10.6	0.461	0.718	119	89
1	23607356	23610777	RLOC_00006866	28	-	28.5	17.0	0.09	0.341	43	48
1	23614339	23622402	RLOC_00006867	714	+	713.9	708.2	0.0105	0.115	205	146
1	23624594	23630060	RLOC_00006868	7	-	7.2	3.3	0.676	0.855	60	59
1	23657498	23667357	RLOC_00006877	739	-	738.8	738.1	0.00283	0.0523	474	480
1	23667557	23669145	RLOC_00006880	7	-	7.5	2.8	0.581	0.799	140	173
1	23685092	23687374	RLOC_00006883	9	+	8.8	-8.8	0.0451	0.246	181	131
1	23707130	23716108	RLOC_00006891	77	-	76.5	29.0	0.692	0.864	83	78
1	23716642	23719480	RLOC_00006892	29	+	29.4	29.4	0.0229	0.177	86	111
1	23729874	23733974	RLOC_00006896	39	+	39.2	-23.5	0.322	0.603	138	142
1	23738640	23740390	RLOC_00006899	3	-	2.9	-0.8	0.735	0.887	370	334
1	23740482	23743411	RLOC_00006900	80	+	79.7	-64.9	0.0366	0.224	289	295
1	23758240	23760663	RLOC_00006906	63	-	63.4	43.7	0.805	0.918	151	147
1	23762258	23766168	RLOC_00006907	10	+	9.8	7.7	0.0528	0.266	63	47
1	23789061	23791229	RLOC_00006912	5	+	5.2	-2.7	0.83	0.928	375	273
1	23803627	23807168	RLOC_00006918	24	-	23.9	-21.9	0.00704	0.0909	212	154
1	23808834	23812725	RLOC_00006920	30	-	29.8	12.8	0.875	0.946	73	59
1	23825264	23827114	RLOC_00006924	9	-	9.2	8.3	0.512	0.756	125	122
1	23827468	23830113	RLOC_00006926	19	-	19.1	16.2	0.105	0.364	176	160
1	23833489	23835621	RLOC_00006929	4	+	4.2	2.7	0.0714	0.304	1208	1239
1	23852747	23855658	RLOC_00006937	11	-	10.6	-10.4	0.4	0.67	51	38
1	23881520	23883804	RLOC_00006944	24	+	23.6	23.6	0.00646	0.0868	76	64
1	23885981	23887323	RLOC_00006945	6	+	6.0	-5.7	0.524	0.764	194	192
1	23887854	23888673	RLOC_00006946	12	+	11.7	2.9	0.805	0.918	52	65
1	23888831	23890132	RLOC_00006947	5	+	5.3	5.0	0.00147	0.0342	1226	1059
1	23899993	23902284	RLOC_00006950	25	+	24.6	22.2	0.0375	0.226	51	61
1	23911043	23915304	RLOC_00006951	14	+	14.1	-13.0	0.0922	0.344	138	134
1	23933261	23939891	RLOC_00006956	483	+	483.2	469.6	0.00748	0.0948	126	156
1	23952074	23952838	RLOC_00006963	13	+	12.9	-12.8	0.128	0.396	60	53
1	23953098	23954610	RLOC_00006964	3	+	2.5	-0.5	0.85	0.935	267	231
1	23954802	23956304	RLOC_00006965	7	-	7.0	-6.3	0.0108	0.117	1134	841
1	23956268	23958461	RLOC_00006966	5	+	4.8	-1.7	0.247	0.53	248	227
1	23968752	23974788	RLOC_00006971	38	+	37.8	-33.2	0.0974	0.354	129	107
1	23978599	23984856	RLOC_00006974	14	+	14.1	-9.6	0.86	0.941	47	44
1	24022284	24023424	RLOC_00006988	11	-	10.6	10.6	0.0821	0.324	174	148
1	24023448	24026530	RLOC_00006989	22	-	22.2	15.3	0.074	0.309	234	160
1	24028828	24033635	RLOC_00006990	96	-	95.9	5.1	0.373	0.647	102	75
1	24028829	24030808	RLOC_00006991	6	+	5.6	1.8	0.445	0.706	405	248
1	24035945	24037464	RLOC_00006992	4	+	4.1	0.4	0.78	0.91	583	480
1	24044556	24048879	RLOC_00006995	27	-	26.5	26.4	1.68e-11	1.4e-08	4153	3542
1	24044685	24046621	RLOC_00006996	27	+	26.7	5.9	0.0739	0.309	120	83
1	24049894	24052551	RLOC_00006998	6	+	6.5	-2.7	0.209	0.49	143	128
1	24051979	24053923	RLOC_00006999	4	-	4.4	0.7	0.428	0.694	393	345
1	24057062	24059706	RLOC_00007001	11	+	10.7	-5.8	0.638	0.834	391	321
1	24060639	24062804	RLOC_00007002	16	-	15.7	-0.1	0.00196	0.0414	211	129
1	24064836	24083428	RLOC_00007003	232	-	232.2	192.8	0.735	0.887	78	45
1	24086543	24090558	RLOC_00007006	51	+	50.7	-45.2	0.245	0.529	69	64
1	24096289	24097733	RLOC_00007009	5	-	4.7	4.0	0.394	0.664	268	218
1	24097735	24101032	RLOC_00007010	4	+	4.0	-0.1	0.704	0.87	390	350
1	24105610	24109243	RLOC_00007012	136	+	136.3	69.0	0.00897	0.106	114	57
1	24113106	24115110	RLOC_00007014	7	+	7.0	-1.7	0.127	0.394	268	160
1	24127505	24129557	RLOC_00007019	11	+	10.8	-8.4	0.35	0.627	175	131
1	24134046	24136231	RLOC_00007021	10	-	10.0	-4.4	0.26	0.543	123	82
1	24137400	24139357	RLOC_00007023	19	-	19.2	-18.5	0.00338	0.0591	146	77
1	24139850	24146281	RLOC_00007024	12	-	12.2	-9.4	0.242	0.525	62	51
1	24147031	24154452	RLOC_00007025	355	+	355.4	353.7	0.2	0.48	160	137
1	24150856	24156608	RLOC_00007026	11	-	10.8	-1.3	0.653	0.842	54	56
1	24156671	24158712	RLOC_00007027	73	+	72.9	-57.4	0.719	0.879	52	28
1	24158631	24163673	RLOC_00007028	47	-	47.2	44.8	0.608	0.818	90	60
1	24215590	24217436	RLOC_00007043	14	-	14.2	-12.1	0.0365	0.224	122	146
1	24226070	24230954	RLOC_00007047	59	+	59.2	55.0	0.277	0.559	556	487
1	24236087	24240738	RLOC_00007052	9	+	9.3	-5.7	0.588	0.803	771	605
1	24241721	24248762	RLOC_00007053	111	+	110.7	-106.3	0.525	0.764	225	220
1	24248731	24250487	RLOC_00007054	10	-	10.3	10.2	0.000632	0.0205	585	444
1	24251433	24253097	RLOC_00007055	29	+	29.1	7.7	0.326	0.608	178	128
1	24257053	24258480	RLOC_00007057	1	+	1.3	-1.2	0.778	0.909	104	50
1	24259879	24262998	RLOC_00007060	23	-	22.9	-21.5	0.898	0.954	104	59
1	24284468	24286347	RLOC_00007072	13	-	12.7	-12.2	0.393	0.663	41	61
1	24295143	24297598	RLOC_00007076	41	+	40.6	40.2	0.16	0.435	59	54
1	24298733	24299662	RLOC_00007080	4	+	3.8	-3.4	0.088	0.337	806	832
1	24300828	24306338	RLOC_00007082	60	-	60.2	-44.5	0.9	0.955	54	61
1	24306499	24314651	RLOC_00007083	90	-	90.0	-85.9	0.54	0.775	118	108
1	24354645	24355490	RLOC_00007095	3	+	3.0	0.4	0.346	0.626	362	133
1	24361001	24366492	RLOC_00007098	26	-	25.9	16.9	0.76	0.901	122	129
1	24377222	24386473	RLOC_00007104	289	-	289.2	280.0	0.308	0.59	66	72
1	24385565	24391244	RLOC_00007106	30	+	29.8	-18.3	0.971	0.985	114	87
1	24414105	24417748	RLOC_00007111	7	-	6.9	6.3	0.286	0.567	97	82
1	24418070	24421361	RLOC_00007112	25	-	24.8	18.4	0.887	0.95	101	86
1	24434202	24436456	RLOC_00007117	6	-	6.0	-4.2	0.619	0.822	53	51
1	24439246	24441084	RLOC_00007119	5	-	5.4	2.3	0.133	0.401	739	628
1	24472872	24476891	RLOC_00007130	104	+	104.0	-94.9	0.231	0.515	35	43
1	24485045	24486954	RLOC_00007132	9	+	9.4	9.2	0.0531	0.267	339	379
1	24489757	24493091	RLOC_00007134	29	+	29.4	13.1	0.243	0.526	79	110
1	24493010	24493923	RLOC_00007135	8	-	7.9	-0.2	0.45	0.71	46	101
1	24498917	24502751	RLOC_00007137	13	-	12.8	-10.7	0.38	0.652	59	40
1	24538894	24542857	RLOC_00007145	7	+	7.1	5.1	0.0453	0.246	957	1182
1	24551806	24557730	RLOC_00007149	28	+	28.0	27.2	0.347	0.626	763	554
1	24557070	24558301	RLOC_00007151	2	-	2.2	1.0	0.336	0.615	157	511
1	24559252	24561180	RLOC_00007153	2	-	2.3	1.4	0.385	0.655	893	882
1	24595773	24598631	RLOC_00007165	9	-	9.3	3.5	0.351	0.628	75	81
1	24605186	24606663	RLOC_00007168	6	-	6.4	6.1	0.0008	0.0236	1535	997
1	24614816	24617025	RLOC_00007171	15	+	14.5	-9.9	0.229	0.513	171	122
1	24619829	24622117	RLOC_00007172	9	-	9.0	6.4	0.582	0.8	56	53
1	24631339	24634987	RLOC_00007174	15	+	15.3	-13.2	0.00441	0.0695	219	210
1	24647077	24648884	RLOC_00007178	10	+	10.5	-8.9	0.00909	0.107	300	157
1	24655114	24657703	RLOC_00007180	6	-	5.8	-1.6	0.0799	0.32	815	875
1	24686113	24687417	RLOC_00007186	3	-	2.9	2.9	0.00675	0.0884	711	688
1	24695605	24698914	RLOC_00007190	16	-	16.3	1.7	0.115	0.379	247	211
1	24729610	24732575	RLOC_00007200	12	-	12.1	-10.9	0.0162	0.148	302	248
1	24734076	24739574	RLOC_00007201	232	+	232.0	231.8	0.11	0.372	57	63
1	24774112	24775984	RLOC_00007209	4	-	3.7	0.0	0.306	0.588	507	398
1	24778256	24780742	RLOC_00007211	9	+	9.2	-3.6	0.742	0.89	125	102
1	24818910	24822410	RLOC_00007222	10	-	10.3	6.1	0.595	0.808	67	35
1	24839089	24840806	RLOC_00007228	5	+	5.2	-4.0	0.742	0.89	860	763
1	24840898	24842609	RLOC_00007229	10	+	9.6	8.4	0.607	0.817	114	89
1	24863733	24865848	RLOC_00007236	3	-	2.7	-0.1	0.87	0.945	206	211
1	24866055	24869087	RLOC_00007237	36	-	36.4	-33.5	0.17	0.445	91	64
[truncated: 7,995 more rows]
