# Supplementary material for: Widespread premature transcription termination of Arabidopsis thaliana NLR genes by the spen protein FPA
Source: eLife. 2021 Apr 27;10:e65537. doi: 10.7554/eLife.65537 (PMC8116057; doi:10.7554/eLife.65537)
Supplement: Figure 2—source data 3. [file elife-65537-fig2-data3.tds]

1	5885	13714	RLOC_00000002	384	-	383.6	-382.9	0.162	0.446	66	89
1	31115	33315	RLOC_00000006	13	-	13.2	13.1	0.118	0.39	208	324
1	33364	37871	RLOC_00000008	25	-	24.8	-4.5	0.0988	0.363	189	336
1	44797	49306	RLOC_00000011	26	-	26.2	-16.4	0.611	0.823	774	953
1	49908	51210	RLOC_00000012	4	-	3.7	2.0	0.126	0.4	2226	2866
1	57163	59215	RLOC_00000014	5	-	4.7	-1.0	0.198	0.483	257	285
1	61904	67705	RLOC_00000015	68	-	68.2	-54.7	0.32	0.611	160	150
1	72315	74250	RLOC_00000017	4	+	3.9	2.2	0.333	0.623	122	153
1	73200	75031	RLOC_00000019	31	-	31.0	21.2	0.504	0.759	450	551
1	75389	76845	RLOC_00000021	22	+	21.5	15.1	0.00598	0.08	54	44
1	88621	90698	RLOC_00000025	102	+	101.7	99.5	0.0993	0.364	74	65
1	91341	95704	RLOC_00000027	9	+	8.9	-0.3	0.59	0.81	25	44
1	95838	99251	RLOC_00000029	23	+	23.3	-16.7	0.7	0.871	150	153
1	99865	101987	RLOC_00000030	48	+	48.0	-29.8	0.59	0.81	162	165
1	108945	111699	RLOC_00000032	27	+	27.2	-20.1	0.84	0.936	76	134
1	116783	118845	RLOC_00000036	19	+	19.2	-18.8	0.0104	0.112	130	146
1	120081	130716	RLOC_00000038	65	-	65.3	-60.8	0.783	0.915	292	389
1	141869	143261	RLOC_00000044	17	+	17.1	-17.1	0.0328	0.216	61	50
1	154175	156058	RLOC_00000050	11	-	11.4	4.8	0.854	0.94	39	36
1	156476	158823	RLOC_00000051	31	-	30.6	-29.8	0.00063	0.0177	375	330
1	159618	162953	RLOC_00000052	16	-	15.7	15.6	0.466	0.73	47	33
1	171524	172948	RLOC_00000057	2	-	1.5	0.6	0.927	0.966	501	458
1	180016	182749	RLOC_00000060	31	-	31.1	31.0	0.00069	0.0188	455	252
1	185032	187135	RLOC_00000061	8	+	8.2	4.1	0.822	0.93	85	80
1	187161	193138	RLOC_00000062	665	+	665.3	663.7	9.43e-05	0.00399	136	202
1	195644	198787	RLOC_00000064	13	+	13.0	1.7	0.27	0.563	145	229
1	199526	201781	RLOC_00000065	3	+	2.6	0.6	0.659	0.849	637	867
1	221641	224351	RLOC_00000071	7	-	6.5	-4.3	0.32	0.612	197	355
1	225615	227528	RLOC_00000072	3	-	2.9	1.8	0.0981	0.362	2328	4415
1	228798	231788	RLOC_00000073	11	+	11.1	-2.0	0.759	0.905	207	289
1	232821	237905	RLOC_00000075	20	-	20.2	4.8	0.857	0.941	85	61
1	258761	267883	RLOC_00000081	526	+	526.4	-521.6	0.188	0.474	103	89
1	267992	270517	RLOC_00000084	5	+	4.7	-2.9	0.491	0.749	216	373
1	269757	274930	RLOC_00000085	18	-	17.6	-6.2	0.981	0.989	97	76
1	270796	272189	RLOC_00000086	5	+	4.7	4.7	0.289	0.583	114	127
1	284349	291222	RLOC_00000091	41	+	40.5	-36.4	0.145	0.428	163	211
1	293245	295096	RLOC_00000093	8	+	7.8	5.4	0.0146	0.137	203	275
1	295843	298262	RLOC_00000095	14	-	14.2	-4.5	0.19	0.475	186	181
1	304104	306311	RLOC_00000099	5	-	5.0	2.7	0.951	0.976	48	51
1	313097	316090	RLOC_00000106	25	-	25.3	24.7	0.488	0.748	120	117
1	319768	322895	RLOC_00000109	14	-	13.8	-12.3	0.711	0.878	35	45
1	322428	324941	RLOC_00000110	7	+	6.9	-1.5	0.388	0.671	66	55
1	330535	337912	RLOC_00000112	12	-	12.4	9.7	0.668	0.856	101	118
1	338241	340093	RLOC_00000113	6	+	6.0	-5.4	0.157	0.441	54	95
1	342818	344345	RLOC_00000115	17	-	16.8	-13.3	0.298	0.592	129	163
1	373334	386913	RLOC_00000124	47	+	46.8	-30.4	0.822	0.929	83	77
1	386760	389808	RLOC_00000125	52	-	51.8	-46.8	0.175	0.463	95	113
1	389820	400001	RLOC_00000126	106	+	106.5	-4.0	0.802	0.922	239	292
1	399982	401919	RLOC_00000127	59	-	58.6	-41.4	0.123	0.395	203	262
1	403099	404456	RLOC_00000130	4	-	3.9	-1.9	0.532	0.777	461	649
1	404594	414345	RLOC_00000131	88	+	88.0	-51.6	0.349	0.638	584	607
1	418415	422579	RLOC_00000134	950	+	949.6	-949.6	3.21e-05	0.00178	120	127
1	443099	446296	RLOC_00000142	5	-	5.0	1.8	0.732	0.891	62	78
1	448420	452755	RLOC_00000143	56	-	56.2	43.8	0.358	0.645	250	328
1	455668	458204	RLOC_00000145	8	+	8.2	7.8	0.338	0.628	260	311
1	461829	467946	RLOC_00000150	69	-	68.9	-68.6	0.0654	0.308	1262	1556
1	469386	471809	RLOC_00000151	39	+	38.8	3.5	0.175	0.463	205	200
1	470041	471625	RLOC_00000152	6	-	5.8	4.3	0.195	0.481	382	616
1	490840	492979	RLOC_00000159	32	+	32.3	-32.2	0.372	0.656	49	74
1	511757	515451	RLOC_00000165	21	-	20.9	-18.2	0.396	0.678	223	224
1	518090	520495	RLOC_00000168	9	+	9.4	8.2	5.48e-06	0.00046	964	1457
1	537739	540127	RLOC_00000174	6	+	6.4	5.0	0.172	0.46	965	973
1	553010	556152	RLOC_00000181	85	-	85.1	-85.1	0.0259	0.189	116	30
1	564017	567857	RLOC_00000186	60	+	60.0	-59.7	0.51	0.762	74	79
1	580635	583195	RLOC_00000190	36	+	36.5	36.5	0.157	0.441	55	59
1	607798	609534	RLOC_00000201	5	-	4.6	-4.1	0.531	0.776	3226	3993
1	621452	623054	RLOC_00000206	53	+	53.1	-52.0	0.043	0.247	74	100
1	623655	624567	RLOC_00000207	5	-	4.6	-1.6	0.277	0.57	311	230
1	626638	629996	RLOC_00000209	22	+	21.7	21.6	0.00446	0.0666	263	257
1	630373	633420	RLOC_00000210	16	+	16.1	12.1	0.0917	0.352	76	81
1	635133	637367	RLOC_00000211	8	+	7.8	4.6	0.569	0.798	81	59
1	637207	638684	RLOC_00000213	5	-	5.4	3.3	0.615	0.825	112	107
1	642504	644903	RLOC_00000217	10	-	10.5	7.8	0.458	0.725	30	47
1	645062	651988	RLOC_00000218	7	-	7.0	0.8	0.353	0.642	85	132
1	655509	658205	RLOC_00000220	2	-	1.7	1.6	0.713	0.879	131	182
1	681330	687385	RLOC_00000230	9	-	9.2	-4.2	0.556	0.79	40	54
1	687785	692660	RLOC_00000231	28	-	27.8	25.9	0.433	0.707	51	41
1	703829	706689	RLOC_00000235	5	-	4.6	3.4	0.129	0.405	94	108
1	712439	727553	RLOC_00000238	290	-	290.0	-286.6	0.0923	0.353	46	43
1	731553	738306	RLOC_00000240	23	-	23.4	-4.6	0.0832	0.337	65	64
1	739672	746782	RLOC_00000241	101	+	101.5	-83.3	0.111	0.382	144	89
1	748033	749048	RLOC_00000245	5	-	5.1	-3.0	0.796	0.92	42	83
1	749243	752000	RLOC_00000246	9	+	8.7	8.1	0.392	0.674	61	44
1	752981	756340	RLOC_00000248	16	-	15.8	-15.8	7.03e-07	8.3e-05	6174	7914
1	754266	758692	RLOC_00000249	26	+	26.3	25.0	0.921	0.964	96	105
1	761267	768235	RLOC_00000251	82	+	81.8	-70.8	0.422	0.698	75	74
1	786831	788722	RLOC_00000258	6	+	6.2	-2.6	0.582	0.805	185	181
1	793284	798461	RLOC_00000261	156	-	156.2	-156.1	0.18	0.467	145	141
1	802969	807112	RLOC_00000263	20	+	19.7	11.9	0.027	0.195	110	98
1	807360	813216	RLOC_00000264	13	+	13.0	12.4	0.0582	0.289	66	59
1	813412	816812	RLOC_00000266	5	+	5.3	0.9	0.782	0.915	71	59
1	817933	819563	RLOC_00000269	7	-	7.1	3.9	0.525	0.771	167	192
1	822581	824410	RLOC_00000271	6	-	6.3	4.1	0.36	0.646	97	162
1	824537	826421	RLOC_00000272	21	+	20.6	20.6	0.0147	0.137	56	37
1	826522	830413	RLOC_00000273	102	+	102.4	-96.9	0.189	0.475	39	38
1	830549	835411	RLOC_00000274	67	+	66.6	-63.5	0.182	0.469	26	34
1	835770	844311	RLOC_00000275	95	+	94.7	-85.2	0.0399	0.24	92	77
1	842560	844226	RLOC_00000277	12	-	11.6	0.5	0.106	0.375	76	94
1	844440	847769	RLOC_00000278	462	-	462.2	-461.3	0.0405	0.241	52	31
1	845676	849655	RLOC_00000279	446	+	445.8	-405.0	0.000363	0.0115	128	197
1	852290	855027	RLOC_00000280	66	+	65.6	65.6	0.124	0.397	68	98
1	868852	871308	RLOC_00000284	7	-	7.4	-6.3	0.0926	0.353	332	293
1	873171	875898	RLOC_00000287	88	-	87.8	-52.5	0.696	0.87	61	56
1	877725	880243	RLOC_00000290	22	-	21.7	19.7	0.26	0.552	39	40
1	894231	897718	RLOC_00000297	7	-	7.2	-6.0	0.456	0.724	69	78
1	898479	899794	RLOC_00000298	2	+	1.7	-0.8	0.22	0.511	2683	3920
1	900684	903056	RLOC_00000300	10	+	9.8	9.7	0.27	0.563	268	266
1	907522	909650	RLOC_00000302	4	+	3.5	1.2	0.265	0.558	703	979
1	916771	918064	RLOC_00000307	2	-	1.6	0.2	0.5	0.755	1476	1487
1	918284	920598	RLOC_00000308	4	+	4.0	1.2	0.494	0.752	40	49
1	933425	937152	RLOC_00000314	16	+	16.5	14.1	0.358	0.645	53	55
1	959789	960916	RLOC_00000326	12	-	12.0	-11.2	0.101	0.366	45	49
1	975840	977911	RLOC_00000329	208	-	207.6	207.1	0.0421	0.245	30	45
1	979306	982002	RLOC_00000330	13	-	12.8	9.9	0.0175	0.151	214	228
1	982371	983591	RLOC_00000331	5	-	5.0	-4.5	0.000579	0.0165	604	1405
1	991105	993126	RLOC_00000334	2	+	1.8	1.8	0.829	0.932	208	238
1	996075	1000629	RLOC_00000336	65	+	65.4	-60.6	0.257	0.549	73	88
1	1004672	1008407	RLOC_00000338	12	+	12.1	-8.4	0.89	0.954	96	111
1	1008493	1011358	RLOC_00000339	251	+	251.0	-242.3	0.162	0.446	57	59
1	1018057	1019247	RLOC_00000343	6	+	5.7	3.2	0.449	0.719	62	53
1	1024392	1029108	RLOC_00000347	561	-	561.3	-561.3	0.0161	0.146	59	87
1	1042229	1043931	RLOC_00000352	17	-	16.9	-4.2	0.0361	0.227	156	343
1	1050504	1051194	RLOC_00000355	11	-	10.6	2.9	0.566	0.797	52	78
1	1051304	1056838	RLOC_00000356	42	+	41.6	37.8	0.226	0.516	109	170
1	1064263	1071080	RLOC_00000361	13	-	13.5	6.2	0.32	0.611	58	90
1	1075507	1080630	RLOC_00000364	8	-	8.5	-2.0	0.452	0.721	189	179
1	1096881	1100078	RLOC_00000367	14	+	13.7	3.6	0.127	0.401	265	283
1	1104503	1106293	RLOC_00000368	16	+	16.2	-11.4	0.878	0.949	25	42
1	1106353	1108725	RLOC_00000369	15	-	15.4	-15.1	0.038	0.235	111	136
1	1114363	1119800	RLOC_00000371	6	+	5.8	-3.4	0.25	0.541	61	80
1	1128088	1129689	RLOC_00000375	9	-	9.0	-8.7	0.00226	0.0426	404	461
1	1136122	1138713	RLOC_00000377	10	+	9.7	8.6	0.0479	0.262	391	567
1	1140277	1143130	RLOC_00000378	22	-	21.8	19.9	0.00954	0.107	1983	2492
1	1143431	1157788	RLOC_00000379	657	-	657.3	611.8	0.013	0.128	337	337
1	1162893	1166198	RLOC_00000383	34	-	34.0	34.0	0.00733	0.0922	75	109
1	1164909	1167135	RLOC_00000384	14	+	13.9	-13.8	0.0106	0.113	258	358
1	1185511	1188696	RLOC_00000390	7	-	7.0	4.9	0.009	0.104	286	304
1	1188994	1191458	RLOC_00000391	6	-	6.4	6.0	0.000109	0.00443	1723	1802
1	1191518	1193884	RLOC_00000392	3	+	3.4	1.1	0.748	0.9	274	428
1	1197955	1201579	RLOC_00000394	10	+	10.0	10.0	0.0321	0.213	267	474
1	1202154	1208059	RLOC_00000395	13	+	13.5	-1.3	0.821	0.929	109	143
1	1215912	1217548	RLOC_00000401	8	+	8.4	-0.0	0.0062	0.0819	902	1090
1	1226482	1230947	RLOC_00000407	3	+	3.2	1.1	0.976	0.986	106	113
1	1234175	1236206	RLOC_00000409	5	-	4.8	4.8	0.203	0.489	185	319
1	1240293	1242209	RLOC_00000412	4	+	3.7	-0.7	0.437	0.711	84	106
1	1244968	1246117	RLOC_00000414	4	+	4.0	3.3	0.327	0.618	52	92
1	1252004	1261458	RLOC_00000416	25	-	25.3	25.1	0.0709	0.316	67	44
1	1287830	1291105	RLOC_00000420	7	-	6.7	-5.8	0.0569	0.287	167	228
1	1291311	1293396	RLOC_00000421	16	+	15.6	-1.3	0.833	0.933	120	164
1	1303466	1307973	RLOC_00000427	202	-	201.7	-149.7	0.0535	0.278	121	157
1	1313442	1315823	RLOC_00000428	14	+	13.6	13.4	0.147	0.429	330	376
1	1321901	1324865	RLOC_00000430	6	+	5.7	1.1	0.739	0.895	49	78
1	1331465	1333651	RLOC_00000433	4	-	4.4	-2.8	0.959	0.979	334	370
1	1340540	1343894	RLOC_00000438	35	-	34.6	33.8	0.412	0.691	94	78
1	1345041	1355483	RLOC_00000439	658	+	658.1	657.9	0.115	0.386	127	155
1	1348451	1349478	RLOC_00000440	29	-	28.6	-28.6	0.00423	0.0643	203	229
1	1356083	1358547	RLOC_00000441	21	-	21.0	16.6	0.0796	0.331	1135	1213
1	1358573	1362019	RLOC_00000442	27	-	26.5	16.0	0.36	0.647	51	49
1	1365044	1368940	RLOC_00000444	5	-	5.1	3.7	0.448	0.718	151	220
1	1369035	1373107	RLOC_00000445	24	-	24.1	-13.7	0.283	0.577	65	110
1	1373229	1375821	RLOC_00000446	6	-	6.3	3.6	0.498	0.755	94	106
1	1387798	1391381	RLOC_00000452	6	-	6.1	-1.9	0.637	0.838	48	63
1	1399173	1403195	RLOC_00000456	30	+	30.1	-27.0	0.625	0.83	249	283
1	1403084	1407531	RLOC_00000457	41	-	40.6	-24.8	0.65	0.845	44	61
1	1407771	1410933	RLOC_00000458	28	-	27.5	-8.7	0.246	0.537	86	88
1	1411133	1413768	RLOC_00000459	19	+	19.5	19.5	0.0285	0.201	74	99
1	1413624	1416218	RLOC_00000460	10	-	9.9	5.6	0.795	0.919	35	31
1	1416310	1421863	RLOC_00000461	119	-	118.6	-118.5	0.299	0.592	121	111
1	1431176	1433010	RLOC_00000465	27	-	27.5	-22.0	0.117	0.389	1842	2196
1	1438058	1443689	RLOC_00000468	21	-	20.9	-20.9	0.0422	0.245	45	38
1	1448627	1450901	RLOC_00000473	25	-	25.4	9.4	0.414	0.693	35	44
1	1450917	1455317	RLOC_00000474	68	-	68.0	66.7	0.825	0.931	71	95
1	1457006	1458802	RLOC_00000475	10	-	10.1	3.2	0.438	0.712	131	130
1	1463038	1466052	RLOC_00000480	13	+	13.0	-12.4	0.208	0.495	63	61
1	1471358	1476303	RLOC_00000482	31	-	31.3	7.8	0.0108	0.115	39	38
1	1477413	1478932	RLOC_00000483	109	-	108.9	63.0	0.0025	0.046	223	208
1	1482517	1484119	RLOC_00000486	4	+	4.2	-3.0	0.491	0.75	216	307
1	1484066	1487027	RLOC_00000487	17	-	17.4	16.8	0.123	0.396	76	98
1	1487371	1494236	RLOC_00000488	430	-	430.4	-430.4	0.116	0.388	71	101
1	1498113	1501953	RLOC_00000490	13	-	13.3	6.2	0.234	0.525	64	78
1	1502242	1503943	RLOC_00000491	2	-	1.8	1.4	0.254	0.546	1410	1814
1	1504939	1509261	RLOC_00000492	317	+	316.9	-287.0	0.0293	0.204	63	52
1	1509102	1510341	RLOC_00000494	2	-	2.4	-1.7	0.874	0.948	73	74
1	1531638	1534767	RLOC_00000504	6	-	6.3	-0.4	0.457	0.725	54	62
1	1553567	1557855	RLOC_00000514	9	+	9.4	6.7	0.298	0.591	57	61
1	1558769	1559919	RLOC_00000516	3	-	2.9	-1.2	0.737	0.894	89	113
1	1560624	1564409	RLOC_00000517	10	-	10.2	8.8	0.239	0.531	60	74
1	1564490	1567516	RLOC_00000518	13	+	12.8	-2.5	0.0794	0.331	33	45
1	1576821	1582672	RLOC_00000520	34	+	34.0	32.1	0.611	0.823	76	85
1	1582499	1583728	RLOC_00000521	27	-	26.9	5.6	0.0108	0.114	87	159
1	1585343	1587806	RLOC_00000524	30	-	29.9	-29.9	0.299	0.592	48	41
1	1594052	1595923	RLOC_00000526	16	-	16.3	11.1	0.726	0.887	93	90
1	1624930	1629303	RLOC_00000532	9	+	8.7	-2.1	0.646	0.842	96	120
1	1630848	1636018	RLOC_00000534	16	-	15.6	6.4	0.369	0.655	67	69
1	1645299	1647435	RLOC_00000538	76	+	75.6	-73.4	0.156	0.441	37	63
1	1645299	1647435	RLOC_00000539	60	-	60.0	-59.9	0.00302	0.0513	138	76
1	1669349	1673923	RLOC_00000544	302	+	302.2	301.4	0.0753	0.325	76	87
1	1717388	1718909	RLOC_00000560	3	-	3.2	3.0	0.554	0.788	120	127
1	1744760	1754043	RLOC_00000573	719	+	719.0	504.0	0.0013	0.03	152	118
1	1754129	1763903	RLOC_00000574	196	+	196.4	-196.4	0.0769	0.328	181	157
1	1762316	1766317	RLOC_00000575	8	-	8.1	2.7	0.845	0.937	64	61
1	1766502	1768837	RLOC_00000577	4	-	4.2	1.6	0.0164	0.146	2146	2651
1	1771358	1773376	RLOC_00000579	77	-	76.5	73.7	0.0986	0.363	130	160
1	1779255	1784681	RLOC_00000581	4	+	4.5	2.3	0.662	0.852	105	109
1	1786845	1789736	RLOC_00000583	3	+	3.5	3.4	0.616	0.826	63	95
1	1790168	1796736	RLOC_00000584	32	+	32.2	24.2	0.893	0.955	42	38
1	1800534	1803987	RLOC_00000587	24	-	23.5	-19.1	0.71	0.878	82	102
1	1807944	1815568	RLOC_00000589	56	-	55.6	-6.8	0.525	0.771	61	60
1	1815813	1817336	RLOC_00000590	12	-	12.3	1.1	0.416	0.695	33	44
1	1820270	1821994	RLOC_00000594	18	-	18.2	-13.7	0.962	0.979	48	88
1	1827995	1829944	RLOC_00000597	2	-	2.3	0.0	0.484	0.744	1457	2011
1	1832940	1834942	RLOC_00000600	5	+	4.5	0.1	0.569	0.798	82	110
1	1843378	1846328	RLOC_00000603	13	+	13.4	8.3	0.132	0.409	1056	323
1	1851315	1855173	RLOC_00000605	41	-	40.6	-37.0	0.727	0.887	103	109
1	1857730	1860938	RLOC_00000608	72	-	71.8	64.8	0.0687	0.313	68	114
1	1867000	1873851	RLOC_00000612	196	-	195.7	195.7	0.0758	0.326	84	67
1	1889141	1891391	RLOC_00000617	110	+	109.8	-92.5	0.0177	0.153	58	88
1	1892230	1894194	RLOC_00000618	19	-	19.5	18.6	0.215	0.506	195	235
1	1894226	1896974	RLOC_00000619	13	-	12.7	11.9	0.00252	0.0462	207	205
1	1897119	1899280	RLOC_00000620	5	+	5.3	4.3	0.762	0.906	90	98
1	1899943	1904896	RLOC_00000621	11	+	10.7	-10.2	0.0751	0.324	152	172
1	1906962	1911061	RLOC_00000623	23	+	23.3	22.9	0.000657	0.0182	127	145
1	1911118	1915077	RLOC_00000624	32	+	31.8	23.0	0.916	0.962	45	63
1	1922207	1926303	RLOC_00000629	18	+	17.7	11.7	0.0316	0.212	128	136
1	1938833	1940496	RLOC_00000635	21	-	21.4	21.0	0.00534	0.0745	171	404
1	1944872	1946287	RLOC_00000637	21	+	20.7	19.8	0.0665	0.309	50	58
1	1946780	1950889	RLOC_00000638	22	+	21.6	-20.5	0.612	0.824	189	205
1	1950595	1952880	RLOC_00000639	64	-	64.2	-45.5	0.112	0.382	178	259
1	1954673	1958866	RLOC_00000641	16	+	15.6	7.7	0.0756	0.326	202	349
1	1960030	1963189	RLOC_00000643	5	-	4.6	-3.0	0.143	0.426	512	904
1	1965594	1969558	RLOC_00000645	1	-	1.3	-0.2	0.977	0.987	311	243
1	1969657	1974526	RLOC_00000648	44	+	44.1	-43.9	0.0275	0.197	38	59
1	1989430	1990754	RLOC_00000652	15	+	14.6	10.4	0.744	0.898	36	53
1	1990615	1992837	RLOC_00000654	9	-	8.9	4.2	0.714	0.88	132	190
1	1992228	1997541	RLOC_00000656	11	+	10.8	4.8	0.54	0.78	121	115
1	2001327	2003651	RLOC_00000658	13	+	13.3	-11.5	0.155	0.44	157	214
1	2001405	2007209	RLOC_00000659	10	-	10.2	10.0	0.0182	0.155	52	79
1	2007625	2012189	RLOC_00000660	168	+	167.6	-167.6	0.167	0.453	38	31
1	2010882	2013594	RLOC_00000661	14	-	14.1	-14.1	0.0488	0.265	275	362
1	2027605	2034056	RLOC_00000665	285	+	284.7	283.8	0.0579	0.289	222	283
1	2034165	2037471	RLOC_00000666	96	+	96.5	71.7	0.105	0.374	226	277
1	2040409	2049742	RLOC_00000669	7	+	7.0	-3.8	4.27e-06	0.000364	17005	20354
1	2048863	2052180	RLOC_00000670	17	-	17.5	-17.5	0.0588	0.29	242	337
1	2052222	2055548	RLOC_00000671	20	-	20.4	20.2	0.0232	0.178	208	263
1	2055744	2067483	RLOC_00000672	229	-	229.3	123.8	0.685	0.864	60	30
1	2076083	2077701	RLOC_00000677	6	-	5.9	0.5	0.0133	0.13	581	972
1	2083310	2087141	RLOC_00000680	111	+	110.9	-110.9	0.0411	0.243	28	46
1	2087224	2090865	RLOC_00000681	70	+	69.8	-61.9	0.548	0.784	40	58
1	2092902	2096784	RLOC_00000685	22	-	21.7	-20.6	0.247	0.538	72	96
1	2097615	2103497	RLOC_00000687	16	-	16.4	-3.9	0.633	0.835	34	33
1	2108511	2111063	RLOC_00000692	9	+	9.4	5.1	0.314	0.606	48	65
1	2111322	2114686	RLOC_00000695	54	-	54.2	48.5	0.00503	0.072	122	134
1	2114884	2121433	RLOC_00000696	88	-	88.1	-82.9	0.65	0.845	59	67
1	2130042	2135707	RLOC_00000702	40	-	40.0	-40.0	0.112	0.383	261	295
1	2135809	2140981	RLOC_00000703	34	+	34.0	-33.1	0.159	0.444	58	91
1	2152810	2155755	RLOC_00000707	10	+	9.8	-9.8	0.0252	0.187	167	320
1	2155115	2156119	RLOC_00000708	2	-	1.7	0.0	0.737	0.894	45	46
1	2158399	2160805	RLOC_00000711	12	-	12.3	-12.0	0.00433	0.0654	75	79
1	2160900	2163369	RLOC_00000712	14	-	14.1	13.7	0.0903	0.349	94	55
1	2168556	2172247	RLOC_00000716	76	+	76.0	-70.8	0.124	0.397	496	683
1	2173043	2175031	RLOC_00000717	19	-	19.1	-12.7	0.0627	0.301	81	135
1	2178021	2184193	RLOC_00000719	24	-	23.9	7.6	0.754	0.902	200	242
1	2191265	2193834	RLOC_00000724	19	-	18.9	13.5	3.77e-05	0.00195	403	504
1	2199996	2201296	RLOC_00000727	4	+	4.3	2.2	0.862	0.943	125	145
1	2204103	2207099	RLOC_00000729	4	+	4.4	0.2	0.749	0.9	383	821
1	2215203	2216989	RLOC_00000732	5	+	4.5	-4.0	0.584	0.807	105	124
1	2220180	2223018	RLOC_00000735	4	-	4.2	0.1	0.965	0.981	123	133
1	2225738	2227705	RLOC_00000737	10	+	10.2	3.5	0.42	0.697	113	165
1	2238016	2241471	RLOC_00000741	20	+	20.4	1.0	0.463	0.728	224	192
1	2245646	2248951	RLOC_00000744	19	-	18.7	-18.6	0.792	0.918	155	231
1	2249100	2254036	RLOC_00000745	11	+	10.6	-4.0	0.059	0.29	974	1232
1	2257277	2260113	RLOC_00000747	9	-	9.1	6.4	0.511	0.762	95	88
1	2260316	2262923	RLOC_00000748	5	-	5.1	-2.3	0.485	0.745	121	183
1	2276042	2280502	RLOC_00000752	162	+	161.6	-158.0	0.2	0.486	97	101
1	2286186	2289403	RLOC_00000754	144	-	144.4	-140.7	0.223	0.513	54	79
1	2291368	2294619	RLOC_00000756	12	+	12.4	-0.6	0.857	0.941	60	78
1	2296022	2299557	RLOC_00000761	9	-	8.8	1.5	0.667	0.855	49	69
1	2304434	2312399	RLOC_00000766	63	+	62.9	-56.8	0.911	0.962	60	72
1	2313580	2316507	RLOC_00000768	1	-	1.3	1.1	0.277	0.57	75	64
1	2331131	2333767	RLOC_00000773	6	-	5.8	5.3	0.554	0.788	49	87
1	2336476	2339391	RLOC_00000776	3	-	3.2	1.6	0.013	0.128	7914	9339
1	2341446	2342148	RLOC_00000778	5	+	4.5	4.4	0.0772	0.328	316	380
1	2352112	2356416	RLOC_00000783	16	-	15.8	9.7	0.468	0.731	86	102
1	2359110	2366736	RLOC_00000784	655	-	654.7	-654.7	0.092	0.353	40	70
1	2368776	2369739	RLOC_00000786	3	+	2.9	1.9	0.465	0.73	175	205
1	2370019	2374607	RLOC_00000787	26	-	26.5	5.9	0.523	0.769	78	87
1	2379594	2381390	RLOC_00000790	9	+	9.1	4.9	0.425	0.7	176	279
1	2381588	2388169	RLOC_00000791	18	+	17.9	-16.8	0.759	0.905	40	44
1	2390530	2392628	RLOC_00000794	22	-	22.1	-9.5	0.725	0.885	79	132
1	2394984	2398826	RLOC_00000797	21	+	20.7	10.5	0.864	0.943	33	56
1	2403991	2406049	RLOC_00000800	10	-	10.3	-4.9	0.693	0.869	72	104
1	2407410	2409697	RLOC_00000802	3	-	2.9	2.7	0.0531	0.278	1689	1975
1	2407471	2408135	RLOC_00000803	4	+	4.5	-0.8	0.666	0.854	302	208
1	2409864	2412777	RLOC_00000804	18	-	17.9	17.2	0.185	0.471	112	92
1	2412922	2413795	RLOC_00000805	5	+	4.8	4.1	0.4	0.681	131	226
1	2416177	2420829	RLOC_00000808	54	+	54.1	52.0	0.797	0.92	83	83
1	2421088	2422066	RLOC_00000809	3	-	2.9	-1.6	0.592	0.812	401	471
1	2422125	2423803	RLOC_00000810	10	+	10.4	0.9	0.0303	0.208	86	90
1	2424053	2429225	RLOC_00000811	30	+	29.6	29.2	0.0325	0.215	54	79
1	2437329	2439777	RLOC_00000814	4	+	3.8	0.6	0.22	0.511	1315	1578
1	2442569	2457401	RLOC_00000815	28	+	27.7	17.4	0.283	0.577	3857	5109
1	2458183	2460817	RLOC_00000818	5	+	5.2	1.8	0.0143	0.135	2121	3027
1	2462948	2465545	RLOC_00000819	3	-	2.9	-2.2	0.383	0.667	3801	5032
1	2465689	2467130	RLOC_00000820	7	-	6.6	1.7	0.523	0.769	68	106
1	2467144	2469316	RLOC_00000821	10	+	9.8	-2.6	0.433	0.707	116	135
1	2473164	2475128	RLOC_00000823	260	-	259.6	-256.9	0.0579	0.289	45	69
1	2476952	2483810	RLOC_00000825	29	+	29.2	23.3	0.316	0.608	80	86
1	2483239	2485726	RLOC_00000826	7	-	7.3	3.5	0.875	0.948	33	45
1	2485760	2488058	RLOC_00000828	36	-	35.8	29.4	0.967	0.981	67	80
1	2489385	2493327	RLOC_00000829	10	-	9.9	-1.6	0.501	0.756	44	53
1	2495304	2498764	RLOC_00000831	4	-	3.6	2.1	0.448	0.718	78	89
1	2501703	2511084	RLOC_00000833	8	-	7.8	0.3	0.848	0.938	33	31
1	2535250	2537950	RLOC_00000840	6	+	6.2	4.9	0.538	0.78	475	604
1	2539550	2542339	RLOC_00000844	11	-	10.5	4.5	0.725	0.885	36	39
1	2542662	2547946	RLOC_00000845	17	-	17.3	7.9	0.8	0.922	64	63
1	2564089	2565230	RLOC_00000852	13	-	12.9	-1.9	0.291	0.586	38	41
1	2567419	2573448	RLOC_00000853	27	+	26.8	25.9	0.672	0.858	136	161
1	2573626	2576782	RLOC_00000854	14	-	13.7	12.5	9.3e-06	0.000698	738	1003
1	2576975	2580754	RLOC_00000855	53	-	52.5	-52.4	0.64	0.839	48	57
1	2583593	2586969	RLOC_00000857	988	-	988.5	-988.5	0.00101	0.0249	60	73
1	2588775	2590609	RLOC_00000859	8	-	8.1	-7.2	0.186	0.471	64	73
1	2635938	2638025	RLOC_00000870	3	+	2.9	1.0	0.152	0.437	1301	1536
1	2638036	2640663	RLOC_00000871	4	+	3.7	0.4	0.579	0.805	91	116
1	2640741	2641898	RLOC_00000872	1	-	1.1	0.4	0.507	0.76	18071	19346
1	2642012	2643295	RLOC_00000873	25	+	25.3	8.1	0.066	0.309	33	44
1	2646166	2657120	RLOC_00000875	479	+	478.8	478.0	0.27	0.563	113	131
1	2667797	2671957	RLOC_00000878	8	-	8.4	-0.4	0.229	0.517	132	153
1	2672197	2674721	RLOC_00000879	19	+	18.6	17.9	0.568	0.797	69	75
1	2675777	2679875	RLOC_00000880	78	+	77.6	-45.8	0.151	0.436	94	112
1	2681959	2684097	RLOC_00000881	16	-	16.0	5.1	0.827	0.932	48	66
1	2684173	2686150	RLOC_00000882	12	+	11.6	-10.8	0.0384	0.235	276	278
1	2685658	2688658	RLOC_00000883	8	-	7.8	-3.9	0.989	0.993	132	157
1	2691053	2694685	RLOC_00000885	53	-	53.4	-52.8	0.25	0.542	271	346
1	2696380	2703217	RLOC_00000886	16	+	16.0	-13.5	0.926	0.966	417	418
1	2703339	2709550	RLOC_00000887	262	+	261.6	-261.5	0.0216	0.17	316	372
1	2709550	2711046	RLOC_00000888	20	-	20.2	10.8	0.545	0.783	44	61
1	2712683	2714842	RLOC_00000889	2	+	2.1	-1.1	0.755	0.902	370	461
1	2714993	2716532	RLOC_00000890	12	-	12.0	6.1	0.0334	0.218	169	186
1	2736689	2743947	RLOC_00000896	100	+	100.2	-79.4	0.861	0.943	37	49
1	2742918	2751278	RLOC_00000897	126	-	126.1	-123.3	0.13	0.407	318	391
1	2752123	2753809	RLOC_00000899	11	+	10.8	7.9	0.626	0.831	40	67
1	2756887	2759889	RLOC_00000900	8	-	8.5	5.5	0.381	0.665	69	56
1	2762583	2769002	RLOC_00000902	4	+	4.5	-4.3	0.761	0.906	60	75
1	2768964	2771465	RLOC_00000903	13	-	13.3	-8.3	0.7	0.871	78	95
1	2801037	2804711	RLOC_00000909	4	+	4.4	-3.1	0.648	0.844	37	45
1	2808520	2811227	RLOC_00000911	25	-	25.2	21.7	0.353	0.642	109	114
1	2808759	2809775	RLOC_00000912	5	+	5.4	3.7	0.146	0.429	91	132
1	2812817	2818071	RLOC_00000914	194	-	193.9	193.9	0.155	0.439	32	38
1	2819051	2820637	RLOC_00000915	39	-	39.2	-38.9	0.158	0.443	24	53
1	2821353	2825487	RLOC_00000916	9	-	8.6	-3.0	0.923	0.964	102	101
1	2827058	2829378	RLOC_00000918	5	+	5.5	0.8	0.673	0.858	300	244
1	2846893	2848100	RLOC_00000923	14	-	14.2	3.4	0.186	0.471	362	426
1	2852362	2855941	RLOC_00000925	12	+	11.7	9.4	0.202	0.488	72	44
1	2867202	2870745	RLOC_00000930	32	+	32.5	25.3	0.73	0.89	56	46
1	2873299	2877261	RLOC_00000931	11	+	10.6	9.8	0.0937	0.355	188	321
1	2882434	2886635	RLOC_00000935	84	+	84.0	83.7	0.416	0.695	272	304
1	2895164	2899446	RLOC_00000939	100	-	99.8	-99.7	0.05	0.268	90	93
1	2899775	2904862	RLOC_00000940	84	-	84.5	84.2	0.0722	0.317	90	89
1	2921063	2925900	RLOC_00000944	4	-	4.3	1.9	0.243	0.534	56	76
1	2927501	2929107	RLOC_00000945	5	+	4.9	-2.7	0.295	0.589	508	478
1	2936474	2939481	RLOC_00000948	16	-	15.7	-7.5	0.884	0.951	49	64
1	2939553	2945964	RLOC_00000950	47	-	46.8	14.6	0.493	0.751	730	746
1	2946029	2949159	RLOC_00000951	10	+	10.2	0.2	0.246	0.536	166	151
1	2951533	2955693	RLOC_00000953	20	-	20.3	1.2	0.248	0.539	92	110
1	2964039	2972472	RLOC_00000956	95	-	95.5	-95.3	0.163	0.447	350	440
1	2972637	2977002	RLOC_00000959	10	-	10.0	-7.3	0.00177	0.0363	318	341
1	2989119	2990418	RLOC_00000967	5	+	5.3	-4.8	0.467	0.73	164	329
1	2994216	2998232	RLOC_00000969	23	+	23.4	23.4	0.0853	0.341	196	185
1	2997454	3001314	RLOC_00000970	7	-	7.1	-0.0	0.809	0.926	42	57
1	3001447	3003783	RLOC_00000971	21	-	21.1	21.1	0.0144	0.136	39	63
1	3008896	3009954	RLOC_00000974	7	+	7.1	6.6	0.109	0.379	5115	6123
1	3009986	3015297	RLOC_00000975	89	-	88.6	-87.4	0.296	0.59	138	227
1	3015236	3018712	RLOC_00000976	3	+	2.9	-1.5	0.405	0.685	2089	4007
1	3031140	3040454	RLOC_00000981	101	+	101.3	18.6	0.779	0.914	62	99
1	3037714	3041873	RLOC_00000985	41	-	41.2	-39.5	0.274	0.566	63	85
1	3041995	3045541	RLOC_00000986	6	+	6.2	-3.4	0.279	0.572	199	182
1	3063935	3065999	RLOC_00000993	6	+	5.6	4.0	0.627	0.831	127	123
1	3066673	3068796	RLOC_00000994	4	+	4.2	-1.2	0.893	0.955	67	49
1	3070855	3072273	RLOC_00000996	18	-	18.0	-11.6	0.184	0.47	83	90
1	3075767	3079654	RLOC_00000997	9	+	8.6	8.0	0.281	0.573	79	46
1	3093643	3094954	RLOC_00001001	2	+	1.9	1.2	0.918	0.963	141	251
1	3095159	3100828	RLOC_00001002	17	-	17.2	7.1	0.181	0.467	553	529
1	3104491	3107801	RLOC_00001004	21	+	21.0	-15.5	0.112	0.383	845	1084
1	3111896	3116692	RLOC_00001007	7	-	6.9	-2.6	0.309	0.601	277	325
1	3118154	3119815	RLOC_00001009	4	-	4.1	-2.0	0.954	0.977	79	74
1	3119738	3122585	RLOC_00001010	14	+	13.7	8.3	0.758	0.904	807	912
1	3122925	3124741	RLOC_00001011	7	+	7.0	-1.1	0.539	0.78	114	147
1	3127744	3131082	RLOC_00001014	9	-	9.0	6.2	0.18	0.467	72	86
1	3136187	3140353	RLOC_00001018	3	-	3.1	1.4	0.736	0.894	1791	2228
1	3147636	3154404	RLOC_00001021	104	-	104.2	103.7	0.0787	0.33	46	58
1	3154414	3156376	RLOC_00001022	7	+	7.3	-6.9	0.74	0.896	54	87
1	3157260	3161698	RLOC_00001023	15	-	14.6	-7.1	0.831	0.933	146	183
1	3157463	3159243	RLOC_00001024	6	+	5.7	5.3	0.101	0.366	232	388
1	3161831	3165616	RLOC_00001025	24	+	23.7	23.7	0.00447	0.0666	247	228
1	3165310	3167899	RLOC_00001026	3	-	3.2	-2.2	0.962	0.979	186	258
1	3172083	3176965	RLOC_00001028	207	+	207.4	-207.1	0.0686	0.313	170	193
1	3176825	3180734	RLOC_00001030	133	-	132.8	132.6	0.0264	0.192	571	436
1	3189300	3190242	RLOC_00001033	2	+	2.1	-1.5	0.951	0.976	113	113
1	3192567	3195044	RLOC_00001035	5	-	4.9	3.8	0.917	0.963	70	94
1	3195718	3200403	RLOC_00001036	36	-	35.9	-26.1	0.874	0.948	79	74
1	3201684	3204150	RLOC_00001037	17	+	16.6	-5.8	0.774	0.912	53	99
1	3205578	3209447	RLOC_00001041	6	+	6.1	0.3	0.464	0.729	74	67
1	3217977	3220136	RLOC_00001045	6	+	6.1	2.2	0.222	0.512	67	97
1	3218578	3227109	RLOC_00001046	433	-	432.8	430.5	0.0951	0.357	123	109
1	3252097	3255782	RLOC_00001055	14	+	14.1	10.2	0.194	0.479	168	213
1	3256188	3261741	RLOC_00001056	22	-	22.2	-5.2	0.421	0.698	56	63
1	3262221	3264976	RLOC_00001057	40	-	39.6	-24.9	0.856	0.941	31	47
1	3269538	3272110	RLOC_00001059	8	-	7.6	5.7	0.844	0.937	58	68
1	3273752	3275953	RLOC_00001060	9	+	9.2	-1.8	0.622	0.829	57	81
1	3284072	3287292	RLOC_00001063	24	+	24.4	-18.4	0.136	0.415	95	48
1	3290161	3296200	RLOC_00001065	154	-	153.6	-100.4	0.268	0.561	44	64
1	3310940	3322336	RLOC_00001073	43	+	43.1	-35.1	0.868	0.945	52	55
1	3322553	3323735	RLOC_00001074	8	-	8.3	-0.2	0.65	0.846	131	59
1	3325831	3327697	RLOC_00001075	6	+	5.9	3.9	0.592	0.812	155	77
1	3333491	3341629	RLOC_00001078	174	-	173.8	-165.1	0.483	0.743	124	154
1	3346382	3348139	RLOC_00001080	8	-	7.7	0.3	0.0446	0.252	215	265
1	3355580	3356453	RLOC_00001084	26	+	25.9	-25.9	0.000402	0.0123	50	60
1	3370401	3377469	RLOC_00001091	33	+	33.4	31.8	0.00179	0.0364	125	122
1	3381377	3388378	RLOC_00001093	76	-	75.8	-69.3	0.662	0.852	104	105
1	3392767	3395089	RLOC_00001096	19	-	18.8	-17.8	0.414	0.693	38	51
1	3395495	3398577	RLOC_00001097	94	-	94.3	-80.9	0.0225	0.175	569	906
1	3400553	3402420	RLOC_00001098	17	+	16.9	-15.1	0.98	0.988	34	37
1	3406951	3412897	RLOC_00001101	5	-	5.3	5.2	0.0131	0.128	122	103
1	3414822	3419691	RLOC_00001103	51	-	50.5	5.6	0.0121	0.124	50	65
1	3428431	3430640	RLOC_00001108	197	-	197.2	194.7	0.624	0.83	70	102
1	3431763	3438370	RLOC_00001110	8	+	8.1	7.2	0.142	0.425	46	38
1	3441987	3444375	RLOC_00001113	34	-	33.9	25.7	0.685	0.864	123	422
1	3453190	3460620	RLOC_00001115	17	+	16.8	4.8	0.464	0.729	45	42
1	3459953	3461513	RLOC_00001116	2	-	1.9	0.1	0.818	0.929	453	555
1	3461514	3465753	RLOC_00001117	4	+	4.2	2.8	0.473	0.735	114	118
1	3469579	3471741	RLOC_00001119	198	+	197.8	197.4	0.0203	0.165	198	214
1	3491257	3495244	RLOC_00001128	369	-	369.1	368.8	0.0183	0.155	64	87
1	3501987	3503544	RLOC_00001131	12	-	12.4	9.2	0.000567	0.0163	469	542
1	3503610	3509027	RLOC_00001132	544	+	544.4	-544.4	0.0115	0.119	84	108
1	3512738	3514824	RLOC_00001134	9	-	8.6	0.5	0.22	0.511	299	366
1	3515181	3518035	RLOC_00001136	11	-	10.5	-5.7	0.635	0.836	43	30
1	3523953	3526531	RLOC_00001137	20	-	20.3	9.3	0.139	0.421	46	70
1	3532228	3535139	RLOC_00001140	4	+	3.5	1.6	0.782	0.915	82	86
1	3535326	3538371	RLOC_00001141	4	+	3.6	3.2	0.136	0.415	476	509
1	3544912	3545614	RLOC_00001143	6	-	6.5	0.5	0.0217	0.171	440	402
1	3554103	3556645	RLOC_00001145	22	+	22.0	21.5	0.0157	0.144	52	57
1	3562828	3564850	RLOC_00001150	12	+	11.9	-9.5	0.588	0.809	55	59
1	3567904	3571062	RLOC_00001152	22	-	22.2	-20.5	0.801	0.922	92	126
1	3580829	3590928	RLOC_00001157	91	-	91.1	-76.3	0.339	0.629	156	102
1	3599033	3605076	RLOC_00001162	169	-	169.3	-145.0	0.163	0.447	45	57
1	3605511	3607595	RLOC_00001164	6	-	6.4	5.0	0.866	0.944	121	137
1	3607630	3610616	RLOC_00001165	4	-	3.8	3.4	0.0602	0.293	346	425
1	3611544	3614826	RLOC_00001167	5	+	5.2	0.6	0.986	0.991	56	66
1	3614507	3616308	RLOC_00001168	3	-	3.4	2.6	0.531	0.775	147	137
1	3627658	3630836	RLOC_00001173	71	+	70.8	59.0	0.656	0.848	52	50
1	3632131	3637250	RLOC_00001174	12	-	12.0	-9.6	0.806	0.924	83	104
1	3639834	3644187	RLOC_00001175	12	+	12.0	11.0	0.132	0.41	81	52
1	3644179	3658612	RLOC_00001176	254	-	253.9	-95.3	0.576	0.803	206	166
1	3659203	3665162	RLOC_00001177	48	+	47.7	45.9	0.00523	0.0737	1655	2184
1	3676606	3678578	RLOC_00001182	36	+	36.1	29.7	0.544	0.782	52	59
1	3702558	3704119	RLOC_00001191	16	+	15.6	-3.5	0.389	0.671	38	52
1	3744834	3748557	RLOC_00001201	27	+	27.0	13.7	0.98	0.988	71	70
1	3753297	3755916	RLOC_00001204	3	+	3.5	-0.8	0.964	0.981	45	77
1	3755593	3756988	RLOC_00001205	13	-	12.6	-5.9	0.338	0.628	71	49
1	3766753	3769799	RLOC_00001208	3	-	3.5	0.9	0.907	0.96	78	96
1	3777235	3780823	RLOC_00001212	7	+	6.9	4.3	0.334	0.624	895	973
1	3787262	3790905	RLOC_00001215	9	-	9.3	7.8	0.781	0.915	72	80
1	3800499	3804266	RLOC_00001219	8	-	8.3	7.6	0.104	0.371	132	159
1	3813871	3823088	RLOC_00001223	436	-	435.8	-407.2	0.0837	0.338	168	197
1	3834406	3838304	RLOC_00001227	36	-	35.9	-13.5	0.93	0.968	33	50
1	3837693	3844474	RLOC_00001228	33	+	33.4	-31.8	0.952	0.977	129	158
1	3847214	3850811	RLOC_00001231	37	+	37.5	-30.9	0.114	0.385	621	673
1	3862407	3864152	RLOC_00001235	8	+	8.3	0.7	0.175	0.463	344	345
1	3864042	3867000	RLOC_00001236	16	-	15.5	8.5	0.0958	0.358	100	125
1	3874394	3875530	RLOC_00001242	3	+	2.9	-0.5	0.309	0.601	169	174
1	3878494	3880391	RLOC_00001245	172	-	171.9	-169.7	0.00306	0.0517	56	43
1	3888609	3890824	RLOC_00001250	32	+	31.6	-24.5	0.348	0.637	53	102
1	3895101	3897028	RLOC_00001253	6	-	5.9	-2.1	0.906	0.959	39	49
1	3901949	3903895	RLOC_00001257	7	+	7.5	0.1	0.837	0.935	44	56
1	3914631	3918243	RLOC_00001263	10	+	9.9	6.3	0.00055	0.0159	660	757
1	3920477	3924573	RLOC_00001265	16	+	15.6	15.2	0.0211	0.168	47	65
1	3938421	3940871	RLOC_00001268	3	+	2.9	2.0	0.566	0.796	268	306
1	3945583	3946757	RLOC_00001272	25	+	25.4	2.8	0.217	0.509	71	87
1	3948713	3957063	RLOC_00001273	261	+	261.4	-228.2	0.222	0.512	76	103
1	3960843	3961696	RLOC_00001276	6	-	6.1	2.0	0.848	0.939	43	41
1	3967475	3969877	RLOC_00001279	6	+	6.3	1.0	0.189	0.474	375	444
1	3969653	3971890	RLOC_00001281	8	-	8.0	-6.7	0.146	0.429	41	56
1	3975946	3979282	RLOC_00001285	4	-	4.3	-1.2	0.838	0.936	38	46
1	3981152	3985224	RLOC_00001287	17	+	17.3	13.5	0.446	0.717	41	43
1	3990994	3993707	RLOC_00001292	5	-	5.1	1.0	0.851	0.939	168	143
1	3995157	3997965	RLOC_00001294	7	+	7.3	2.1	0.0167	0.148	608	991
1	3999198	4000118	RLOC_00001295	11	+	10.7	6.5	0.398	0.679	133	143
1	4001112	4006792	RLOC_00001296	48	+	48.0	-46.2	0.0195	0.161	1874	3145
1	4010726	4013151	RLOC_00001299	19	+	19.2	-19.1	0.18	0.467	119	201
1	4014781	4016544	RLOC_00001303	17	+	17.4	-14.1	0.222	0.512	41	56
1	4016711	4021043	RLOC_00001304	5	-	4.7	2.9	0.0987	0.363	1264	1550
1	4028594	4030656	RLOC_00001308	52	+	52.0	51.4	0.057	0.287	129	197
1	4049826	4053862	RLOC_00001315	7	-	7.3	6.3	0.474	0.736	184	213
1	4061362	4063549	RLOC_00001318	72	-	72.2	-64.5	0.339	0.628	34	48
1	4072754	4077330	RLOC_00001322	29	+	28.6	-21.7	0.406	0.685	124	114
1	4084161	4085185	RLOC_00001325	35	+	34.8	-28.2	0.00474	0.0695	148	46
1	4089578	4090874	RLOC_00001326	3	-	2.8	2.3	0.000352	0.0112	6022	5013
1	4105215	4109601	RLOC_00001328	122	+	121.5	-120.6	0.0327	0.215	125	205
1	4114673	4117614	RLOC_00001329	5	-	5.2	-3.9	0.294	0.588	130	148
1	4121368	4125120	RLOC_00001331	115	+	114.7	-113.3	0.07	0.314	59	74
1	4144256	4151069	RLOC_00001341	28	+	28.4	21.9	0.502	0.756	306	366
1	4153556	4161529	RLOC_00001342	111	+	111.2	-109.5	0.262	0.554	625	910
1	4171993	4174830	RLOC_00001345	6	+	6.4	0.1	0.977	0.987	114	156
1	4186652	4188233	RLOC_00001349	8	-	8.3	7.8	0.153	0.438	268	374
1	4194419	4196847	RLOC_00001352	14	+	13.7	13.5	0.0565	0.286	50	73
1	4198365	4206486	RLOC_00001354	326	+	325.8	312.3	0.302	0.594	117	157
1	4220118	4222897	RLOC_00001357	49	+	49.4	-44.7	0.524	0.77	80	128
1	4223029	4225254	RLOC_00001358	9	+	9.4	6.8	0.0714	0.316	445	521
1	4241420	4243229	RLOC_00001362	1	-	1.0	-0.3	0.929	0.967	469	627
1	4247203	4250752	RLOC_00001364	28	+	27.9	-21.6	0.804	0.923	35	120
1	4250944	4257457	RLOC_00001365	3	+	3.2	-1.5	0.96	0.979	56	56
1	4262952	4265060	RLOC_00001370	8	-	8.1	6.4	0.343	0.632	115	180
1	4266617	4270907	RLOC_00001371	71	-	71.1	-60.6	0.541	0.781	126	108
1	4282793	4285876	RLOC_00001376	4	+	4.5	-1.2	0.656	0.848	70	116
1	4303254	4306101	RLOC_00001384	10	-	10.3	7.9	0.241	0.532	67	85
1	4305790	4308023	RLOC_00001385	10	+	9.9	8.0	0.628	0.832	85	91
1	4319864	4323265	RLOC_00001393	5	-	5.2	4.9	0.232	0.522	52	57
1	4348497	4355993	RLOC_00001402	297	+	296.9	293.5	0.0222	0.173	257	342
1	4353638	4361270	RLOC_00001403	130	-	130.4	-130.4	0.0657	0.308	288	336
1	4361508	4365398	RLOC_00001404	5	-	4.9	-0.4	0.447	0.718	328	420
1	4367255	4368844	RLOC_00001406	12	+	11.8	3.3	0.0328	0.216	138	168
1	4368705	4371474	RLOC_00001408	4	-	4.5	-1.1	0.884	0.951	127	137
1	4374154	4375203	RLOC_00001410	21	-	20.8	-16.9	0.162	0.446	66	74
1	4374204	4378514	RLOC_00001411	18	+	17.7	17.7	0.00415	0.0635	420	489
1	4378831	4379607	RLOC_00001412	6	-	5.6	-1.2	0.567	0.797	98	73
1	4379693	4381764	RLOC_00001413	13	-	13.3	-11.0	0.137	0.417	127	157
1	4384327	4387133	RLOC_00001415	14	+	13.5	-5.8	0.358	0.645	127	125
1	4392410	4394455	RLOC_00001419	2	-	1.8	-1.4	0.0199	0.163	3976	6337
1	4394730	4398198	RLOC_00001420	83	-	83.2	-82.5	0.0679	0.311	387	470
1	4423539	4425937	RLOC_00001426	19	+	19.3	8.5	0.239	0.531	32	35
1	4436088	4439639	RLOC_00001429	10	-	9.5	7.1	0.622	0.829	41	45
1	4440403	4443954	RLOC_00001431	41	-	40.7	39.2	0.0676	0.311	54	76
1	4452189	4454900	RLOC_00001434	5	+	5.2	0.5	0.896	0.955	303	388
1	4459001	4460996	RLOC_00001437	10	+	9.6	-5.0	0.248	0.539	87	72
1	4461737	4463589	RLOC_00001438	11	+	10.8	-10.0	0.638	0.838	106	103
1	4467078	4469069	RLOC_00001441	3	+	2.9	-2.3	0.596	0.814	194	191
1	4469128	4473319	RLOC_00001442	17	-	17.1	17.1	0.337	0.627	29	34
1	4480792	4483835	RLOC_00001446	63	+	63.4	-62.9	0.828	0.932	35	55
1	4484586	4488587	RLOC_00001448	46	+	46.3	-43.5	0.162	0.446	59	57
1	4488532	4492667	RLOC_00001449	15	-	14.7	-13.9	0.383	0.667	49	52
1	4494923	4498469	RLOC_00001450	8	+	8.3	7.1	0.578	0.804	25	27
1	4498788	4501694	RLOC_00001451	309	+	308.5	307.8	0.024	0.18	175	188
1	4525224	4526197	RLOC_00001458	2	-	2.1	-0.3	0.188	0.474	1958	1294
1	4528333	4530110	RLOC_00001461	6	-	6.5	3.1	0.721	0.884	111	54
1	4542167	4543970	RLOC_00001463	11	+	10.9	10.7	0.563	0.795	370	52
1	4544955	4549164	RLOC_00001464	41	+	41.1	34.5	0.747	0.9	213	181
1	4563427	4567849	RLOC_00001468	15	-	14.6	-1.2	0.019	0.159	151	168
1	4572279	4576711	RLOC_00001471	23	-	22.8	-15.2	0.542	0.781	40	46
1	4576872	4578369	RLOC_00001472	8	-	7.7	5.1	0.285	0.578	192	330
1	4588993	4590501	RLOC_00001475	12	-	12.3	-1.9	0.404	0.685	140	177
1	4592303	4594468	RLOC_00001476	32	-	31.8	31.8	3.15e-05	0.00177	87	97
1	4608076	4610878	RLOC_00001481	2	-	2.2	0.0	0.924	0.965	3095	4655
1	4612649	4615219	RLOC_00001484	17	-	16.8	-16.8	0.0658	0.308	68	65
1	4615767	4618548	RLOC_00001485	25	+	25.2	13.1	0.914	0.962	57	71
1	4636983	4644422	RLOC_00001497	32	-	31.8	25.4	0.79	0.918	271	300
1	4658461	4663502	RLOC_00001501	83	-	82.9	79.7	0.178	0.466	74	95
1	4676947	4679808	RLOC_00001510	9	-	9.2	-2.5	0.961	0.979	66	91
1	4680289	4682382	RLOC_00001511	29	-	29.0	15.2	0.0312	0.211	121	129
1	4693298	4695309	RLOC_00001515	18	+	18.0	13.3	0.0097	0.108	114	115
1	4709756	4712672	RLOC_00001520	17	+	17.1	-8.0	0.814	0.927	74	105
1	4733990	4735453	RLOC_00001530	17	+	16.6	16.6	0.0168	0.148	37	51
1	4735557	4738008	RLOC_00001531	22	+	21.9	18.4	0.0313	0.211	178	220
1	4748872	4751262	RLOC_00001538	9	+	9.1	-6.9	0.46	0.726	52	62
1	4753092	4755659	RLOC_00001540	73	-	72.8	72.8	0.00314	0.0525	60	78
1	4760952	4762666	RLOC_00001544	2	+	2.1	1.7	0.0237	0.179	3118	2098
1	4761935	4766848	RLOC_00001545	43	-	42.9	35.3	0.0617	0.298	52	51
1	4773433	4774980	RLOC_00001547	13	+	13.0	12.4	0.0825	0.336	46	38
1	4776282	4779420	RLOC_00001548	34	+	34.0	34.0	1.43e-05	0.000949	66	82
1	4788478	4796633	RLOC_00001550	215	+	215.5	-210.2	0.0791	0.33	183	165
1	4797244	4800306	RLOC_00001551	25	+	25.3	-7.1	0.128	0.404	140	195
1	4800145	4801859	RLOC_00001552	11	-	10.7	3.4	0.859	0.941	80	88
1	4802678	4805373	RLOC_00001554	25	+	24.8	24.6	0.0101	0.111	34	44
1	4805251	4807510	RLOC_00001555	4	-	4.4	2.5	0.735	0.893	105	95
1	4816338	4818025	RLOC_00001559	29	-	29.0	-2.1	0.401	0.682	43	42
1	4833395	4835118	RLOC_00001567	6	-	6.3	4.3	0.623	0.829	50	97
1	4839215	4840795	RLOC_00001570	3	+	3.1	-1.6	0.585	0.808	250	379
1	4842287	4843092	RLOC_00001572	0	+	0.4	0.4	0.669	0.856	216	158
1	4856474	4858017	RLOC_00001579	22	-	22.5	6.8	0.346	0.635	79	63
1	4868375	4871651	RLOC_00001583	25	+	25.3	8.4	0.0241	0.181	128	130
1	4874862	4877256	RLOC_00001585	14	-	13.6	-11.9	0.788	0.917	155	174
1	4877451	4879483	RLOC_00001586	6	+	5.9	-1.3	0.168	0.454	341	477
1	4880029	4882265	RLOC_00001587	4	-	4.2	1.1	0.728	0.888	85	148
1	4882335	4884818	RLOC_00001588	7	-	6.6	4.1	0.845	0.937	62	56
1	4884951	4886814	RLOC_00001589	3	+	2.8	0.4	0.874	0.948	56	57
1	4888146	4891663	RLOC_00001591	3	+	2.6	2.2	0.114	0.385	2325	3078
1	4897306	4900131	RLOC_00001593	18	+	18.1	12.8	0.301	0.594	364	677
1	4911092	4913167	RLOC_00001597	9	-	8.7	-8.5	0.13	0.406	61	61
1	4917330	4921638	RLOC_00001600	7	-	6.9	6.7	0.219	0.509	102	73
1	4926485	4928812	RLOC_00001603	7	-	6.9	1.4	0.00736	0.0923	584	609
1	4928930	4931111	RLOC_00001604	4	-	4.4	-0.9	0.665	0.854	73	78
1	4938753	4941332	RLOC_00001607	109	-	108.8	-72.6	0.0439	0.249	66	69
1	4946217	4947670	RLOC_00001608	2	-	2.3	-0.5	0.895	0.955	389	478
1	4948637	4953284	RLOC_00001611	13	-	12.9	-11.7	0.715	0.88	35	47
1	4961593	4964515	RLOC_00001616	4	-	3.8	1.9	0.736	0.894	159	189
1	4980623	4983367	RLOC_00001622	6	+	5.7	5.7	0.557	0.79	36	37
1	4983530	4987420	RLOC_00001623	4	+	4.1	-2.0	0.786	0.917	158	183
1	4989539	4992805	RLOC_00001624	38	+	37.7	22.6	3.76e-05	0.00195	171	182
1	5008139	5014529	RLOC_00001630	14	-	14.1	-9.1	0.717	0.881	169	161
1	5014674	5016708	RLOC_00001631	7	-	7.3	3.4	0.134	0.413	72	68
1	5023449	5031908	RLOC_00001633	91	+	91.4	-89.1	0.48	0.741	95	138
1	5037575	5040597	RLOC_00001636	7	+	7.4	-5.3	0.477	0.738	244	375
1	5042323	5045618	RLOC_00001638	20	+	19.8	12.4	0.612	0.824	121	136
1	5051587	5055278	RLOC_00001644	23	-	23.3	21.8	0.0162	0.146	63	62
1	5058582	5061309	RLOC_00001645	5	+	5.0	1.2	0.477	0.739	141	187
1	5061693	5065303	RLOC_00001646	13	-	13.2	-9.2	0.0183	0.155	127	138
1	5066524	5068677	RLOC_00001647	8	-	8.1	7.8	0.0539	0.279	157	175
1	5075178	5077981	RLOC_00001649	19	-	19.4	-14.4	0.219	0.509	99	115
1	5102369	5104891	RLOC_00001657	6	-	6.2	-5.7	0.662	0.852	240	255
1	5104974	5107107	RLOC_00001659	7	-	7.1	-0.8	0.439	0.712	43	52
1	5107396	5115640	RLOC_00001660	158	-	158.1	-145.0	0.372	0.656	267	317
1	5116522	5123559	RLOC_00001661	49	-	49.1	-32.8	0.915	0.962	41	53
1	5136873	5137982	RLOC_00001666	8	+	7.7	7.4	0.07	0.314	163	175
1	5138081	5139582	RLOC_00001667	10	-	10.4	10.4	0.00484	0.0701	215	276
1	5139711	5143735	RLOC_00001668	6	-	5.8	3.7	0.836	0.934	112	89
1	5148936	5151427	RLOC_00001671	26	+	25.7	19.8	0.000246	0.00838	326	464
1	5165488	5168336	RLOC_00001677	16	-	16.3	11.9	0.387	0.67	673	794
1	5168463	5170066	RLOC_00001678	19	+	19.0	5.5	0.637	0.838	53	51
1	5171119	5176429	RLOC_00001680	56	-	56.2	-13.8	0.0493	0.266	44	49
1	5177509	5183687	RLOC_00001683	46	+	45.6	-45.1	0.445	0.717	77	111
1	5181990	5186996	RLOC_00001686	187	-	187.3	-135.0	0.0126	0.125	93	87
1	5193283	5194214	RLOC_00001690	4	-	4.2	3.9	0.608	0.822	46	96
1	5202592	5205964	RLOC_00001692	16	+	16.4	-15.9	0.0755	0.326	557	664
1	5205942	5209931	RLOC_00001693	12	-	11.6	11.5	0.134	0.412	103	142
1	5210158	5212455	RLOC_00001694	20	-	20.0	19.1	0.474	0.736	182	298
1	5224293	5226778	RLOC_00001700	4	+	3.8	-2.2	0.566	0.796	119	196
1	5228191	5231184	RLOC_00001703	58	-	57.7	-29.1	0.0345	0.221	111	104
1	5239986	5241538	RLOC_00001706	23	-	23.2	23.2	0.0515	0.273	41	30
1	5242072	5243262	RLOC_00001707	30	-	29.5	-29.5	0.0159	0.145	109	95
1	5243382	5248737	RLOC_00001708	45	+	45.4	36.5	0.698	0.871	50	72
1	5248663	5252121	RLOC_00001709	15	-	15.1	14.5	0.701	0.872	1068	1188
1	5249759	5250573	RLOC_00001710	21	+	21.3	-20.9	0.000215	0.00754	206	282
1	5252284	5256863	RLOC_00001711	28	+	28.1	16.7	0.621	0.828	89	96
1	5256673	5265100	RLOC_00001712	68	-	67.9	-2.1	0.179	0.466	144	157
1	5275615	5277869	RLOC_00001717	23	-	22.9	-22.8	0.00419	0.0639	463	397
1	5278021	5279988	RLOC_00001718	21	-	21.5	21.4	0.12	0.392	78	112
1	5286882	5288667	RLOC_00001720	13	+	13.4	-12.4	0.111	0.382	183	214
1	5290581	5292582	RLOC_00001721	7	+	6.8	0.5	0.529	0.774	58	54
1	5294365	5297075	RLOC_00001723	61	-	61.2	-59.6	0.00218	0.0419	214	262
1	5294449	5296068	RLOC_00001724	11	+	10.7	6.0	0.0407	0.242	119	160
1	5297846	5298571	RLOC_00001725	8	-	7.7	-4.3	0.266	0.559	61	47
1	5297911	5300939	RLOC_00001726	40	+	39.8	-9.2	0.731	0.89	70	73
1	5300732	5303522	RLOC_00001727	14	-	14.5	11.2	0.938	0.971	71	56
1	5306026	5309558	RLOC_00001729	6	-	6.5	-5.2	0.737	0.894	43	50
1	5325317	5328891	RLOC_00001735	10	+	10.0	-6.0	0.194	0.479	459	594
1	5389951	5391672	RLOC_00001756	16	+	16.2	14.1	0.179	0.466	82	49
1	5398917	5403853	RLOC_00001759	15	+	14.6	-2.1	0.768	0.908	1097	1363
1	5404129	5405910	RLOC_00001761	42	+	42.1	39.9	0.396	0.677	63	53
1	5406133	5410035	RLOC_00001763	8	-	8.0	2.9	0.214	0.504	158	200
1	5410783	5414985	RLOC_00001765	14	+	13.5	-6.5	0.418	0.696	165	172
1	5414359	5421045	RLOC_00001766	7	-	7.4	-3.8	0.952	0.977	198	230
1	5430035	5436618	RLOC_00001772	19	-	19.2	17.6	0.0271	0.195	73	68
1	5441024	5443911	RLOC_00001774	119	-	118.5	-94.7	0.282	0.576	52	36
1	5444219	5446564	RLOC_00001775	15	+	15.1	0.1	0.0441	0.25	63	80
1	5446442	5447878	RLOC_00001777	2	-	2.1	-1.5	1.42e-05	0.000949	16328	20375
1	5454765	5457022	RLOC_00001784	3	+	3.4	2.0	0.801	0.922	118	152
1	5458395	5461124	RLOC_00001786	10	-	9.8	5.3	0.553	0.788	112	142
1	5460489	5464252	RLOC_00001787	107	+	106.9	104.6	0.45	0.72	34	49
1	5465338	5471149	RLOC_00001789	189	+	188.9	187.9	0.115	0.386	95	143
1	5471315	5473293	RLOC_00001790	6	+	6.1	4.2	0.473	0.735	1254	1630
1	5473358	5478405	RLOC_00001791	52	+	51.7	-46.5	0.193	0.479	58	55
1	5478702	5482648	RLOC_00001792	9	+	8.9	4.9	0.703	0.873	496	639
1	5486272	5489132	RLOC_00001794	18	-	17.8	16.1	0.114	0.385	41	57
1	5489214	5492148	RLOC_00001795	10	+	10.3	4.6	0.000631	0.0177	652	908
1	5494526	5495435	RLOC_00001798	20	+	19.6	-19.3	0.0544	0.281	72	62
1	5495008	5497833	RLOC_00001799	12	-	12.2	-5.9	0.297	0.59	96	111
1	5498000	5501370	RLOC_00001800	14	+	13.7	-13.7	0.586	0.808	46	57
1	5504607	5507059	RLOC_00001804	32	+	32.1	-31.6	0.615	0.826	37	49
1	5514281	5516162	RLOC_00001807	16	+	16.3	15.7	0.142	0.425	331	688
1	5538665	5540002	RLOC_00001816	12	-	12.0	2.0	0.314	0.606	115	165
1	5540049	5542902	RLOC_00001817	5	+	5.0	-4.4	0.414	0.693	407	512
1	5543145	5546190	RLOC_00001818	11	+	10.9	-1.7	0.386	0.669	46	59
1	5546098	5547753	RLOC_00001819	3	-	3.1	-2.2	0.27	0.563	205	255
1	5554842	5556844	RLOC_00001824	5	-	4.8	-3.2	0.538	0.78	273	313
1	5558785	5562140	RLOC_00001826	74	-	73.9	-45.5	0.199	0.484	42	43
1	5562860	5568459	RLOC_00001827	170	+	170.1	-167.8	0.409	0.687	45	43
1	5578264	5582210	RLOC_00001831	17	+	17.5	-14.7	0.406	0.685	324	489
1	5587722	5590761	RLOC_00001833	5	-	5.2	-0.9	0.94	0.971	37	37
1	5590755	5593098	RLOC_00001834	8	+	8.0	0.4	0.341	0.631	105	117
1	5608681	5612064	RLOC_00001840	20	+	19.8	-15.8	0.196	0.481	175	202
1	5619543	5622674	RLOC_00001846	37	-	37.4	37.4	0.163	0.448	151	162
1	5622745	5625683	RLOC_00001847	8	+	7.5	-4.0	0.887	0.953	195	254
1	5659369	5668263	RLOC_00001858	350	+	350.3	345.5	0.273	0.566	26	33
1	5668386	5670730	RLOC_00001859	7	+	7.0	-3.1	0.506	0.76	112	121
1	5675494	5678873	RLOC_00001863	28	-	28.2	-14.8	0.0711	0.316	174	178
1	5702116	5713752	RLOC_00001871	287	+	286.5	-261.2	0.225	0.514	245	286
1	5713793	5722614	RLOC_00001872	152	+	152.0	-103.5	0.674	0.858	39	45
1	5722881	5729154	RLOC_00001873	173	+	173.4	-172.8	0.00986	0.109	643	955
1	5726319	5727407	RLOC_00001875	5	-	5.4	3.5	0.813	0.927	89	171
1	5729035	5732020	RLOC_00001876	67	-	66.6	-61.4	0.317	0.608	42	34
1	5744334	5745259	RLOC_00001881	1	+	1.5	0.6	0.986	0.991	42	59
1	5755587	5756924	RLOC_00001882	5	+	4.5	-1.9	0.181	0.467	326	316
1	5757507	5760521	RLOC_00001884	63	+	62.7	62.6	0.111	0.382	451	366
1	5762645	5764157	RLOC_00001886	7	-	7.1	4.9	0.829	0.932	171	157
1	5767279	5770656	RLOC_00001888	17	+	16.7	13.1	0.887	0.953	75	92
1	5770731	5773322	RLOC_00001889	16	-	16.4	16.4	0.00127	0.0298	59	78
1	5773568	5777828	RLOC_00001890	7	+	6.9	4.5	0.0584	0.29	830	1418
1	5776176	5778542	RLOC_00001891	10	-	10.1	9.5	0.0173	0.15	466	545
1	5786481	5789262	RLOC_00001895	11	-	10.6	6.8	0.831	0.932	226	278
1	5799694	5800887	RLOC_00001900	5	+	5.2	-2.5	0.673	0.858	83	66
1	5800771	5805821	RLOC_00001901	9	-	9.3	3.1	0.859	0.942	32	43
1	5828914	5831383	RLOC_00001909	8	+	8.5	8.2	0.134	0.414	180	310
1	5840185	5841719	RLOC_00001914	22	-	22.0	-18.3	0.293	0.588	250	277
1	5844483	5850934	RLOC_00001916	56	-	55.5	-46.6	0.0456	0.255	65	72
1	5844562	5846527	RLOC_00001917	7	+	7.1	-7.0	0.05	0.268	212	409
1	5851846	5853991	RLOC_00001918	8	+	8.1	7.4	0.258	0.55	65	104
1	5854092	5857787	RLOC_00001919	13	+	12.6	10.6	0.163	0.447	111	118
1	5856526	5858573	RLOC_00001921	12	-	12.0	6.5	0.0285	0.201	89	77
1	5860064	5862890	RLOC_00001923	13	-	13.4	-9.8	0.192	0.477	55	39
1	5867534	5869436	RLOC_00001926	10	+	9.6	-6.8	0.0535	0.278	71	74
1	5869542	5870883	RLOC_00001927	3	+	2.7	2.2	0.884	0.951	51	34
1	5875294	5876620	RLOC_00001929	6	+	6.0	-3.1	0.365	0.651	56	77
1	5878394	5880190	RLOC_00001930	2	+	2.4	-0.8	0.836	0.935	381	433
1	5879607	5884786	RLOC_00001931	14	-	14.2	-1.2	0.495	0.752	123	147
1	5885006	5890500	RLOC_00001932	22	+	22.0	18.1	0.0452	0.254	505	794
1	5916827	5920342	RLOC_00001942	3	-	3.4	2.7	0.585	0.808	224	205
1	5922331	5926400	RLOC_00001944	4	+	4.4	-2.5	0.281	0.574	338	418
1	5929814	5932005	RLOC_00001947	9	+	9.2	9.2	0.243	0.533	35	48
1	5946447	5951657	RLOC_00001951	117	+	116.9	-88.1	0.119	0.391	72	83
1	5951541	5955143	RLOC_00001953	38	-	37.8	20.7	0.0669	0.31	264	310
1	5983936	5987934	RLOC_00001963	12	-	11.9	-10.3	0.648	0.844	73	86
1	6002895	6007420	RLOC_00001967	7	+	6.5	-5.9	0.236	0.527	211	264
1	6008436	6009420	RLOC_00001969	2	+	2.4	-1.0	0.981	0.989	81	96
1	6023464	6024331	RLOC_00001972	9	-	9.1	-0.4	0.458	0.725	39	53
1	6024628	6027565	RLOC_00001973	146	-	146.1	146.1	0.0658	0.308	41	54
1	6027430	6029115	RLOC_00001974	10	+	10.0	-7.9	0.376	0.66	118	152
1	6034269	6037398	RLOC_00001977	32	+	31.6	28.7	0.00691	0.0881	119	97
1	6039249	6049685	RLOC_00001980	27	+	27.0	-23.6	0.969	0.983	36	53
1	6061894	6063362	RLOC_00001985	4	+	3.9	3.8	0.141	0.424	112	162
1	6069423	6072140	RLOC_00001988	35	-	35.1	33.9	0.145	0.428	73	112
1	6082721	6088381	RLOC_00001993	3	-	2.5	0.9	0.827	0.931	38	40
1	6093153	6098445	RLOC_00001996	42	-	42.3	16.0	0.804	0.923	81	114
1	6099038	6100397	RLOC_00001997	2	+	2.4	1.7	0.659	0.849	133	144
1	6110034	6116609	RLOC_00002003	170	-	169.8	150.6	0.258	0.55	39	35
1	6123556	6125339	RLOC_00002005	4	+	4.2	-3.7	0.37	0.655	77	84
1	6129977	6131657	RLOC_00002008	8	+	8.1	-8.0	0.446	0.717	38	97
1	6131063	6135343	RLOC_00002009	9	-	8.9	0.7	0.673	0.858	31	42
1	6142401	6146521	RLOC_00002013	14	+	14.3	2.0	0.798	0.921	319	351
1	6149177	6150038	RLOC_00002016	1	+	1.2	-0.4	0.629	0.832	102	108
1	6149304	6153999	RLOC_00002017	66	-	66.1	-65.4	0.0122	0.124	1117	1370
1	6154253	6155830	RLOC_00002019	2	-	1.8	1.0	0.992	0.995	81	98
1	6169284	6173273	RLOC_00002025	91	-	90.7	-90.7	0.105	0.373	36	45
1	6184716	6187567	RLOC_00002028	14	+	14.0	-2.4	0.455	0.722	60	36
1	6187510	6196204	RLOC_00002029	719	-	718.5	718.5	0.00161	0.034	343	341
1	6199734	6207037	RLOC_00002030	649	+	648.7	645.8	3.12e-05	0.00176	305	298
1	6211831	6213591	RLOC_00002035	6	-	6.3	-5.5	0.08	0.332	379	690
1	6213650	6218384	RLOC_00002036	9	-	8.8	-2.6	0.129	0.405	250	318
1	6222200	6224242	RLOC_00002040	5	+	5.2	-4.9	0.247	0.538	1447	1805
1	6244297	6247830	RLOC_00002047	7	-	6.5	-4.9	0.359	0.646	99	94
1	6248618	6257907	RLOC_00002048	67	+	66.9	65.4	0.579	0.805	188	240
1	6257694	6261445	RLOC_00002049	36	-	35.8	-34.0	0.164	0.448	29	42
1	6265176	6268873	RLOC_00002053	56	-	55.9	-54.5	0.262	0.554	134	254
1	6276776	6278258	RLOC_00002059	7	-	6.7	-6.1	0.672	0.858	36	54
1	6278783	6282144	RLOC_00002060	3	-	3.3	1.6	0.516	0.764	76	87
1	6305813	6313941	RLOC_00002067	1279	-	1279.4	-1273.7	2.81e-05	0.00166	231	136
1	6316710	6324378	RLOC_00002069	263	-	263.0	-257.7	0.134	0.413	77	62
1	6331404	6333877	RLOC_00002072	11	+	10.6	8.0	0.832	0.933	102	57
1	6343127	6347930	RLOC_00002075	52	+	52.4	51.7	0.143	0.426	50	58
1	6348047	6352010	RLOC_00002076	6	+	5.7	2.2	0.808	0.925	121	140
1	6352329	6356261	RLOC_00002077	12	+	11.7	-4.2	0.925	0.965	111	126
1	6355694	6360344	RLOC_00002078	17	-	16.6	16.5	0.214	0.505	88	101
1	6361616	6366311	RLOC_00002079	182	+	181.7	-181.5	0.362	0.649	70	105
1	6366396	6368916	RLOC_00002080	7	+	6.6	-6.1	0.944	0.974	63	80
1	6368965	6373080	RLOC_00002081	21	+	20.9	15.9	0.375	0.66	203	190
1	6376638	6378580	RLOC_00002085	2	-	2.4	-1.4	0.228	0.517	1004	1554
1	6395768	6398274	RLOC_00002089	19	+	19.4	16.1	0.18	0.467	45	57
1	6398530	6400029	RLOC_00002090	17	+	17.5	-7.3	0.07	0.314	65	111
1	6400281	6402832	RLOC_00002091	7	+	7.4	7.4	0.605	0.82	67	63
1	6405607	6416514	RLOC_00002092	505	+	505.1	-504.6	0.0077	0.0948	259	311
1	6416178	6421188	RLOC_00002093	126	-	125.8	-119.2	0.181	0.467	275	352
1	6419038	6425898	RLOC_00002094	50	+	50.0	-46.2	0.961	0.979	103	128
1	6426708	6431093	RLOC_00002095	25	-	25.5	-1.8	0.921	0.964	35	42
1	6431937	6433552	RLOC_00002096	21	-	20.7	-18.2	0.978	0.987	41	49
1	6432929	6437236	RLOC_00002097	243	+	242.9	-227.0	0.153	0.438	46	59
1	6437476	6444238	RLOC_00002098	205	+	205.0	-195.3	0.128	0.403	73	70
1	6450603	6453469	RLOC_00002101	129	+	128.7	-126.3	0.0774	0.328	159	168
1	6457774	6460405	RLOC_00002102	5	-	5.0	-2.2	0.31	0.602	235	272
1	6459211	6462367	RLOC_00002103	23	+	23.0	-7.7	0.00114	0.0273	518	672
1	6463806	6465566	RLOC_00002105	11	+	10.8	9.4	0.332	0.621	55	77
1	6465463	6466483	RLOC_00002106	22	-	22.3	18.1	0.804	0.923	50	31
1	6481046	6483599	RLOC_00002113	28	-	27.9	26.5	5.45e-05	0.00255	148	149
1	6485512	6487152	RLOC_00002114	4	-	4.3	1.7	0.853	0.94	76	53
1	6500752	6504567	RLOC_00002120	4	-	4.3	0.5	0.823	0.93	98	105
1	6504676	6506542	RLOC_00002121	6	-	6.5	-3.3	0.974	0.985	53	69
1	6520761	6523904	RLOC_00002126	66	+	66.3	15.1	0.33	0.621	41	39
1	6522763	6526075	RLOC_00002127	5	-	4.6	2.3	0.767	0.908	56	64
1	6528983	6532697	RLOC_00002129	106	+	105.6	96.8	0.138	0.419	31	47
1	6546176	6552108	RLOC_00002133	10	+	10.2	7.0	0.357	0.644	46	52
1	6558573	6562951	RLOC_00002138	23	-	23.0	16.3	0.00488	0.0704	832	980
1	6577424	6579321	RLOC_00002142	12	-	11.7	-11.6	0.0562	0.286	32	129
1	6584223	6586571	RLOC_00002144	20	+	20.2	-20.1	0.404	0.684	51	56
1	6602104	6606028	RLOC_00002148	11	+	10.8	-10.8	0.0335	0.218	86	146
1	6608067	6609480	RLOC_00002150	3	+	2.9	-0.7	0.807	0.924	137	145
1	6609278	6613052	RLOC_00002152	166	-	166.3	-165.7	0.0643	0.305	163	213
1	6612629	6613972	RLOC_00002154	4	+	3.6	-0.8	0.304	0.596	661	1018
1	6621776	6623620	RLOC_00002158	8	+	7.6	-4.8	0.892	0.955	113	69
1	6649242	6650464	RLOC_00002165	10	-	10.2	1.0	0.56	0.792	51	56
1	6676209	6677680	RLOC_00002173	6	-	5.8	5.1	0.416	0.695	74	66
1	6688531	6691216	RLOC_00002177	7	+	7.3	-1.0	0.181	0.467	352	341
1	6689495	6692496	RLOC_00002178	22	-	21.9	-5.2	0.0171	0.149	93	98
1	6711958	6716439	RLOC_00002186	35	-	34.7	-27.9	0.936	0.97	365	355
1	6724380	6728078	RLOC_00002190	11	-	11.2	-7.2	0.926	0.966	56	72
1	6731367	6734984	RLOC_00002192	22	-	22.2	-16.3	0.593	0.812	127	205
1	6759894	6762906	RLOC_00002200	11	+	11.4	5.4	0.11	0.38	62	77
1	6773248	6774611	RLOC_00002206	27	-	27.2	-27.2	0.228	0.517	1276	1467
1	6774682	6777568	RLOC_00002207	8	+	8.2	-2.8	0.571	0.8	99	136
1	6778886	6781222	RLOC_00002208	8	+	8.2	6.0	0.592	0.811	145	182
1	6796070	6799793	RLOC_00002213	96	-	96.2	-23.8	0.311	0.603	45	46
1	6799968	6802906	RLOC_00002214	5	-	5.2	1.0	0.739	0.896	392	438
1	6803425	6805091	RLOC_00002215	4	-	3.6	1.9	0.933	0.969	268	314
1	6805325	6807928	RLOC_00002216	13	+	12.6	-10.9	0.118	0.39	88	83
1	6807679	6813063	RLOC_00002217	19	-	19.1	-6.8	0.996	0.997	135	160
1	6816611	6822745	RLOC_00002220	83	-	83.0	79.7	0.509	0.762	158	182
1	6822843	6824210	RLOC_00002221	7	-	7.2	4.1	0.545	0.783	85	102
1	6824320	6826194	RLOC_00002222	15	+	15.3	4.8	0.654	0.847	506	525
1	6832304	6834631	RLOC_00002224	6	+	6.5	-3.4	0.0311	0.211	244	211
1	6846332	6848122	RLOC_00002227	14	+	13.6	-12.7	0.123	0.396	120	160
1	6855898	6860563	RLOC_00002230	39	-	38.6	36.5	0.0551	0.282	80	173
1	6886670	6891437	RLOC_00002232	114	+	114.1	-110.2	0.171	0.459	36	73
1	6891362	6894752	RLOC_00002233	17	-	17.2	3.5	0.822	0.929	53	61
1	6895008	6898818	RLOC_00002234	18	-	18.0	-12.5	0.72	0.883	111	153
1	6900288	6904157	RLOC_00002235	48	-	47.5	46.5	0.446	0.717	76	91
1	6913000	6914689	RLOC_00002238	5	+	5.2	4.9	0.0549	0.281	879	1008
1	6914517	6916823	RLOC_00002239	5	-	5.1	-3.4	0.632	0.835	160	253
1	6937718	6940832	RLOC_00002249	22	-	22.1	5.8	0.017	0.149	495	442
1	6942660	6945128	RLOC_00002252	17	+	17.1	-15.8	0.663	0.852	1211	973
1	6949000	6968965	RLOC_00002255	3398	+	3398.5	3397.0	0.000118	0.00471	357	632
1	6969024	6971049	RLOC_00002262	46	-	46.2	-45.6	0.0318	0.212	169	194
1	6971441	6977274	RLOC_00002263	101	+	100.7	100.7	0.0259	0.189	155	202
1	6986311	6987863	RLOC_00002267	5	+	4.8	-2.0	0.685	0.864	44	57
1	6987271	6993972	RLOC_00002268	67	-	67.0	65.6	0.143	0.426	50	36
1	6998056	6999841	RLOC_00002271	11	-	10.9	10.0	0.55	0.785	197	151
1	7001086	7004435	RLOC_00002272	11	-	11.2	-8.1	0.322	0.613	199	241
1	7004770	7009477	RLOC_00002274	175	-	175.3	-172.0	0.0789	0.33	402	437
1	7016598	7020690	RLOC_00002278	22	+	22.2	0.4	0.0394	0.238	388	470
1	7038526	7040231	RLOC_00002285	6	-	5.8	-3.7	0.513	0.763	435	809
1	7042045	7043392	RLOC_00002286	2	-	2.0	1.9	0.0145	0.137	17877	25462
1	7051576	7053745	RLOC_00002292	5	-	4.7	4.1	0.62	0.828	37	59
1	7083160	7085858	RLOC_00002299	51	-	50.9	50.3	0.0402	0.241	972	894
1	7087902	7089606	RLOC_00002301	10	-	10.2	6.6	0.000117	0.0047	558	428
1	7090940	7093442	RLOC_00002302	6	+	6.0	3.1	0.675	0.859	51	52
1	7103361	7106121	RLOC_00002309	12	-	12.3	-12.1	0.0386	0.235	99	107
1	7112611	7115411	RLOC_00002313	6	+	6.5	-4.8	0.839	0.936	70	56
1	7119645	7126559	RLOC_00002315	17	-	17.4	-17.4	0.117	0.389	60	55
1	7126730	7128747	RLOC_00002316	11	-	10.7	6.6	0.134	0.412	52	67
1	7128859	7130794	RLOC_00002317	21	+	21.1	8.8	0.928	0.967	263	271
1	7142619	7149908	RLOC_00002321	84	+	84.4	-84.3	1.59e-06	0.000167	4773	4125
1	7154409	7158287	RLOC_00002322	6	+	5.9	-5.7	0.623	0.829	36	59
1	7157825	7160707	RLOC_00002323	24	-	24.5	24.5	0.162	0.446	209	210
1	7164004	7168040	RLOC_00002325	110	-	109.9	103.4	0.0321	0.213	39	45
1	7174276	7176617	RLOC_00002329	102	-	102.5	-96.7	0.292	0.587	54	44
1	7176746	7178895	RLOC_00002331	11	+	11.3	9.0	0.01	0.11	859	557
1	7179272	7181604	RLOC_00002332	16	+	15.7	-1.1	0.00518	0.0732	572	414
1	7209297	7214993	RLOC_00002341	4	+	3.8	-0.6	0.957	0.978	95	103
1	7215009	7216897	RLOC_00002342	25	-	24.6	17.1	0.246	0.536	70	77
1	7231980	7235128	RLOC_00002353	31	+	30.6	30.1	0.677	0.86	209	284
1	7242895	7244981	RLOC_00002356	10	+	10.0	-5.5	0.0955	0.357	58	74
1	7252110	7253747	RLOC_00002359	114	+	114.1	-112.9	0.894	0.955	139	121
1	7261995	7265555	RLOC_00002363	34	-	33.6	-32.8	0.228	0.517	49	31
1	7265791	7267392	RLOC_00002364	16	-	16.1	12.0	0.408	0.687	46	53
1	7276897	7281236	RLOC_00002366	10	-	10.5	10.0	0.071	0.316	45	42
1	7285053	7292580	RLOC_00002367	109	+	108.5	79.2	0.0502	0.269	67	67
1	7297233	7310262	RLOC_00002371	62	-	62.5	57.8	0.846	0.938	331	344
1	7313900	7319921	RLOC_00002372	6	+	6.4	4.1	0.898	0.956	88	123
1	7324470	7329441	RLOC_00002373	32	+	31.7	31.3	0.0158	0.144	116	113
1	7337604	7339509	RLOC_00002376	20	+	20.0	18.5	0.00479	0.0698	377	206
1	7346167	7347296	RLOC_00002378	29	+	28.7	27.6	0.0989	0.363	52	31
1	7366589	7368203	RLOC_00002381	3	+	2.8	-0.3	0.698	0.871	262	353
1	7370610	7375893	RLOC_00002383	74	+	73.9	72.0	0.00176	0.036	810	810
1	7378535	7382661	RLOC_00002385	26	-	26.1	26.0	0.00634	0.0827	128	137
1	7386761	7388514	RLOC_00002387	3	-	3.0	2.7	0.814	0.927	89	94
1	7398813	7400820	RLOC_00002390	20	-	19.5	9.4	0.664	0.853	567	387
1	7419657	7420957	RLOC_00002395	14	-	14.4	14.1	0.009	0.104	156	134
1	7421155	7427335	RLOC_00002396	175	+	174.8	144.7	0.573	0.801	32	30
1	7444636	7448483	RLOC_00002405	17	+	16.8	-15.6	0.242	0.532	79	67
1	7447489	7448483	RLOC_00002406	4	-	3.7	-1.9	0.834	0.934	33	36
1	7453233	7455076	RLOC_00002410	7	-	6.6	-3.2	0.569	0.798	206	320
1	7476889	7479258	RLOC_00002420	5	-	4.7	4.0	0.787	0.917	169	220
1	7485635	7488780	RLOC_00002423	6	-	6.0	-5.4	0.324	0.615	88	92
1	7493212	7499638	RLOC_00002428	359	+	358.5	357.8	0.00395	0.0612	458	403
1	7502081	7504275	RLOC_00002431	15	-	14.8	14.3	0.0402	0.241	128	113
1	7508678	7513472	RLOC_00002432	47	+	47.1	-14.3	0.94	0.972	88	71
1	7511749	7513481	RLOC_00002433	6	-	5.8	1.8	0.682	0.863	35	46
1	7529704	7531108	RLOC_00002439	12	-	12.4	-7.6	0.00159	0.034	1809	2101
1	7554670	7557112	RLOC_00002449	22	+	22.3	22.0	0.0193	0.16	39	44
1	7557139	7565914	RLOC_00002450	195	-	195.4	-195.4	0.032	0.213	56	55
1	7566193	7570014	RLOC_00002451	49	-	49.5	19.5	0.00608	0.0807	155	187
1	7570844	7573847	RLOC_00002452	14	-	14.3	-4.6	0.413	0.692	187	178
1	7573829	7578967	RLOC_00002453	16	+	15.7	12.4	0.929	0.967	42	41
1	7581007	7588177	RLOC_00002455	13	+	13.3	12.8	0.0292	0.203	144	170
1	7588413	7592952	RLOC_00002456	5	+	5.2	3.9	0.768	0.908	147	149
1	7605627	7609243	RLOC_00002459	12	+	12.0	3.4	0.903	0.958	68	84
1	7610240	7612721	RLOC_00002460	15	+	14.5	14.2	0.0238	0.18	88	49
1	7612833	7615374	RLOC_00002461	5	+	4.8	-2.4	0.559	0.792	259	206
1	7615504	7618628	RLOC_00002462	12	+	11.8	11.8	0.0159	0.145	77	85
1	7619884	7624125	RLOC_00002465	14	-	14.3	1.3	0.225	0.514	53	66
1	7624319	7626150	RLOC_00002466	8	+	7.6	-1.6	0.154	0.439	32	48
1	7626181	7628315	RLOC_00002467	3	+	2.7	2.1	0.426	0.701	231	334
1	7645609	7648855	RLOC_00002472	10	+	10.1	4.0	0.756	0.903	175	192
1	7649147	7654026	RLOC_00002473	61	+	61.4	-52.3	0.536	0.779	222	263
1	7651571	7652288	RLOC_00002474	17	-	17.4	-17.4	8.27e-05	0.0036	247	245
1	7654048	7655993	RLOC_00002475	9	+	9.0	-5.6	0.47	0.733	39	48
1	7660886	7662743	RLOC_00002479	51	-	50.5	-40.7	3.42e-05	0.00188	488	189
1	7666427	7668827	RLOC_00002481	24	+	24.2	-8.2	0.57	0.798	46	47
1	7680416	7683030	RLOC_00002487	21	+	20.8	20.8	0.418	0.696	58	86
1	7690801	7692459	RLOC_00002490	7	-	6.6	0.1	0.767	0.908	106	161
1	7704147	7706355	RLOC_00002492	5	-	4.6	-3.3	0.19	0.475	266	134
1	7712818	7714459	RLOC_00002495	4	+	3.9	-3.4	0.645	0.842	93	120
1	7734660	7738772	RLOC_00002502	30	+	29.8	-28.2	0.101	0.366	102	73
1	7754269	7758188	RLOC_00002509	83	+	82.9	68.3	0.0767	0.328	56	60
1	7771507	7773220	RLOC_00002513	6	+	5.6	-2.5	0.406	0.685	43	55
1	7772865	7781638	RLOC_00002515	93	-	93.1	92.5	0.475	0.737	95	102
1	7789132	7792201	RLOC_00002518	19	+	18.6	-4.0	0.124	0.397	83	52
1	7814662	7815722	RLOC_00002527	7	-	7.5	0.1	0.255	0.547	270	351
1	7823065	7823971	RLOC_00002529	7	+	7.1	-3.1	0.545	0.783	87	127
1	7835780	7837411	RLOC_00002534	18	+	17.7	4.5	0.759	0.905	120	68
1	7837486	7840898	RLOC_00002535	6	-	6.4	2.5	0.6	0.816	98	124
1	7865472	7866422	RLOC_00002542	8	+	8.0	-7.4	0.0464	0.257	268	278
1	7873866	7876018	RLOC_00002545	19	+	19.5	18.7	0.0605	0.295	96	87
1	7878758	7881395	RLOC_00002547	4	-	4.5	3.4	0.62	0.828	576	607
1	7886323	7889544	RLOC_00002550	212	+	211.7	-211.7	0.0772	0.328	46	56
1	7892757	7897705	RLOC_00002552	324	-	324.3	-269.8	0.0256	0.188	75	112
1	7903659	7906969	RLOC_00002556	610	-	610.1	608.6	0.015	0.139	33	56
1	7911900	7915093	RLOC_00002558	8	+	8.4	6.8	0.00875	0.102	305	523
1	7919076	7921893	RLOC_00002560	53	+	53.0	-47.4	0.209	0.496	172	192
1	7925120	7927345	RLOC_00002562	6	+	6.4	-4.1	0.564	0.795	272	342
1	7949475	7950900	RLOC_00002568	2	+	2.3	0.4	0.988	0.992	36	41
1	7950561	7954453	RLOC_00002570	110	-	109.6	108.5	0.308	0.601	138	174
1	7955420	7958575	RLOC_00002572	19	-	19.2	19.2	2.78e-05	0.00165	201	528
1	7966473	7968692	RLOC_00002574	9	-	9.0	-4.2	0.643	0.841	23	61
1	7981721	7984334	RLOC_00002578	10	+	10.1	10.1	0.0166	0.147	105	186
1	7994165	8002989	RLOC_00002580	7	-	7.4	-3.5	0.366	0.652	48	44
1	7994193	7997786	RLOC_00002581	11	+	10.6	10.3	0.0274	0.196	108	207
1	8003222	8004317	RLOC_00002582	4	+	4.4	3.7	0.898	0.956	357	446
1	8005931	8007583	RLOC_00002583	8	+	7.9	-1.6	0.218	0.509	318	193
1	8027166	8028189	RLOC_00002588	1	+	0.9	0.6	0.684	0.864	616	838
1	8028082	8030136	RLOC_00002589	5	-	5.3	4.6	0.0164	0.146	332	364
1	8030586	8033156	RLOC_00002591	5	-	5.5	2.1	0.535	0.778	392	554
1	8046132	8052953	RLOC_00002593	161	+	161.4	-146.2	0.152	0.437	301	498
1	8061750	8067790	RLOC_00002595	35	+	35.4	33.6	0.582	0.806	62	25
1	8067870	8071582	RLOC_00002596	10	+	10.1	-9.7	0.753	0.902	820	1011
1	8076414	8080603	RLOC_00002600	14	+	13.7	-2.1	0.369	0.655	467	591
1	8080461	8083012	RLOC_00002602	7	-	7.1	-5.6	0.143	0.426	486	731
1	8083183	8094509	RLOC_00002604	418	+	418.2	-414.3	0.543	0.782	52	57
1	8098391	8102500	RLOC_00002607	98	+	98.2	-97.6	0.0187	0.158	193	379
1	8102725	8103618	RLOC_00002608	2	+	2.3	1.4	0.893	0.955	145	260
1	8104992	8108361	RLOC_00002610	35	+	35.3	-13.7	0.332	0.621	98	108
1	8109573	8112061	RLOC_00002611	13	-	12.7	-3.3	0.563	0.795	83	134
1	8117285	8122151	RLOC_00002612	45	+	45.4	45.4	0.00096	0.024	155	142
1	8122353	8125138	RLOC_00002613	10	+	9.9	-0.1	0.407	0.686	49	61
1	8125013	8127277	RLOC_00002614	34	-	34.2	33.1	0.623	0.829	47	55
1	8130603	8134388	RLOC_00002616	24	-	24.2	-7.3	0.789	0.918	68	83
1	8147736	8153796	RLOC_00002622	92	-	92.2	-91.8	0.202	0.488	50	52
1	8156503	8159185	RLOC_00002624	4	+	4.1	0.1	0.805	0.923	81	62
1	8164781	8166862	RLOC_00002626	39	+	39.0	-37.0	0.841	0.937	71	84
1	8168026	8169263	RLOC_00002627	20	-	19.8	-10.1	0.278	0.571	203	49
1	8180116	8183650	RLOC_00002631	10	-	10.2	8.2	0.779	0.914	544	335
1	8195772	8196913	RLOC_00002633	13	+	13.1	-11.3	0.14	0.422	48	47
1	8200323	8201267	RLOC_00002637	4	+	3.9	2.6	0.878	0.949	2072	2656
1	8212646	8219652	RLOC_00002644	186	+	185.6	182.6	0.308	0.601	53	61
1	8219807	8224547	RLOC_00002645	5	+	4.8	0.7	0.853	0.94	179	249
1	8242360	8252056	RLOC_00002650	608	+	607.6	-583.5	0.0985	0.362	146	171
1	8256853	8258741	RLOC_00002653	4	-	3.7	0.1	0.58	0.805	175	172
1	8260559	8266048	RLOC_00002655	7	-	7.5	1.2	0.682	0.863	103	104
1	8262924	8263739	RLOC_00002656	1	+	1.3	0.3	0.633	0.835	1703	1994
1	8267809	8271996	RLOC_00002657	10	-	10.1	5.3	0.0235	0.179	5919	8085
1	8279553	8282421	RLOC_00002659	17	-	16.7	6.0	0.174	0.462	34	48
1	8295077	8296941	RLOC_00002662	11	-	11.1	3.1	0.744	0.898	61	51
1	8308964	8310916	RLOC_00002668	15	-	14.7	-14.3	0.123	0.396	1120	262
1	8311966	8315876	RLOC_00002669	5	-	4.6	-2.9	0.681	0.863	116	168
1	8321589	8329910	RLOC_00002673	264	+	264.0	-219.9	0.154	0.439	169	175
1	8332892	8336430	RLOC_00002675	55	+	55.4	-52.2	0.246	0.537	65	173
1	8336579	8338827	RLOC_00002676	12	+	11.8	-4.4	0.195	0.481	903	928
1	8385201	8386551	RLOC_00002699	12	+	11.9	7.2	0.177	0.465	81	65
1	8398114	8399836	RLOC_00002703	2	-	1.7	0.4	0.505	0.759	735	1142
1	8400055	8401550	RLOC_00002704	3	+	2.9	-0.6	0.902	0.958	58	40
1	8406662	8408530	RLOC_00002707	33	-	33.0	33.0	3.85e-05	0.00196	112	117
1	8420183	8422991	RLOC_00002711	16	+	16.2	4.3	0.0537	0.279	270	284
1	8427242	8429570	RLOC_00002716	53	-	53.3	-33.4	0.0039	0.0608	150	205
1	8432061	8438811	RLOC_00002717	128	+	128.3	128.1	0.267	0.56	132	97
1	8441067	8447681	RLOC_00002719	75	+	75.4	65.4	0.805	0.923	76	58
1	8469510	8471417	RLOC_00002725	32	-	32.1	31.8	0.0241	0.181	90	115
1	8478387	8481599	RLOC_00002726	7	-	6.5	6.5	0.0141	0.134	172	198
1	8481994	8483875	RLOC_00002727	657	-	656.6	-656.2	0.00972	0.108	38	51
1	8500118	8502065	RLOC_00002734	9	-	8.6	-8.6	0.00295	0.0505	185	269
1	8502312	8506815	RLOC_00002735	178	-	177.6	-168.0	0.0499	0.268	68	104
1	8506971	8508936	RLOC_00002737	9	+	8.9	8.0	0.0721	0.317	181	194
1	8525333	8527087	RLOC_00002745	48	-	48.4	-47.8	0.000444	0.0133	156	142
1	8529031	8532262	RLOC_00002747	28	-	27.7	-21.6	0.515	0.764	60	64
1	8540837	8542053	RLOC_00002751	14	+	13.7	2.0	0.324	0.614	39	36
1	8542225	8543605	RLOC_00002752	12	+	12.1	2.6	0.0296	0.205	95	130
1	8544273	8545628	RLOC_00002753	13	+	13.2	8.0	0.0312	0.211	212	219
1	8553312	8556750	RLOC_00002756	8	-	7.9	7.1	0.285	0.578	181	174
1	8557214	8559066	RLOC_00002757	6	-	6.3	-1.6	0.893	0.955	44	119
1	8560397	8570594	RLOC_00002758	56	-	56.4	-55.5	0.715	0.88	157	202
1	8586334	8588180	RLOC_00002764	12	+	11.7	11.2	0.365	0.651	53	40
1	8604021	8607484	RLOC_00002770	20	-	19.8	-19.0	0.0221	0.173	89	91
1	8612436	8620696	RLOC_00002774	302	-	302.2	125.5	0.175	0.463	49	60
1	8624037	8626465	RLOC_00002775	6	+	5.8	-1.4	0.775	0.913	63	50
1	8635192	8639082	RLOC_00002778	4	+	4.5	3.1	0.955	0.977	39	60
1	8638519	8640825	RLOC_00002779	8	-	8.2	-6.0	0.372	0.656	77	92
1	8640560	8644436	RLOC_00002780	10	+	10.4	7.9	0.781	0.915	395	433
1	8661872	8664046	RLOC_00002793	11	+	10.8	10.8	0.46	0.726	84	42
1	8664063	8665569	RLOC_00002794	10	+	9.8	9.7	0.169	0.456	59	90
1	8682197	8685325	RLOC_00002801	29	+	28.7	20.7	0.226	0.516	105	89
1	8685177	8688250	RLOC_00002802	42	-	42.1	-39.7	0.0715	0.316	358	422
1	8702360	8705879	RLOC_00002807	9	+	9.1	-0.2	0.207	0.495	55	60
1	8719932	8722761	RLOC_00002813	17	-	16.8	-8.2	0.617	0.827	84	128
1	8725831	8727348	RLOC_00002816	7	-	7.3	-4.5	0.305	0.598	81	81
1	8741835	8755604	RLOC_00002822	837	+	836.7	824.1	0.0631	0.302	61	52
1	8759518	8763398	RLOC_00002826	22	-	21.5	14.9	0.244	0.535	56	59
1	8765613	8771553	RLOC_00002827	61	+	60.7	4.3	0.521	0.768	444	566
1	8775800	8778080	RLOC_00002830	73	+	73.2	-34.6	0.000159	0.00595	2029	1731
1	8778279	8783851	RLOC_00002831	162	+	161.6	-159.9	0.269	0.562	105	125
1	8784047	8785881	RLOC_00002832	8	+	7.6	2.9	0.297	0.591	348	453
1	8798353	8800602	RLOC_00002836	73	+	72.9	-33.0	0.000636	0.0178	2031	1731
1	8801703	8806380	RLOC_00002839	297	+	296.7	-295.1	0.271	0.564	106	126
1	8806575	8808361	RLOC_00002840	8	+	7.6	2.9	0.295	0.589	348	453
1	8812707	8820744	RLOC_00002843	154	+	154.5	64.1	0.00393	0.0612	2132	1858
1	8820931	8822843	RLOC_00002844	8	+	7.6	2.8	0.322	0.613	347	453
1	8826982	8832975	RLOC_00002846	81	+	81.0	-40.0	9.04e-05	0.00389	2043	1744
1	8833066	8837048	RLOC_00002847	34	+	34.3	32.2	0.485	0.746	439	554
1	8835418	8839609	RLOC_00002848	213	-	212.6	-210.9	0.291	0.585	68	101
1	8839925	8842405	RLOC_00002850	12	-	12.4	-12.3	0.452	0.721	168	313
1	8853533	8855874	RLOC_00002857	12	-	11.8	11.4	0.349	0.638	258	285
1	8860526	8861522	RLOC_00002859	2	+	2.3	-1.7	0.555	0.789	855	593
1	8863767	8866894	RLOC_00002861	5	+	4.5	2.7	0.554	0.788	97	126
1	8867023	8869289	RLOC_00002862	3	+	3.1	-0.0	0.683	0.864	36	67
1	8889011	8894325	RLOC_00002869	5	-	5.2	3.2	0.345	0.634	126	125
1	8903404	8906455	RLOC_00002873	20	+	20.4	18.8	0.294	0.588	49	55
1	8915914	8918279	RLOC_00002876	17	+	16.8	16.7	0.0402	0.241	113	120
1	8922549	8924511	RLOC_00002878	39	+	39.4	16.0	0.131	0.407	52	82
1	8933198	8935482	RLOC_00002881	6	-	5.5	-2.9	0.517	0.764	343	311
1	8938386	8940613	RLOC_00002882	21	-	21.2	18.5	0.085	0.341	57	93
1	8944572	8946619	RLOC_00002885	7	-	7.2	6.0	0.853	0.94	36	42
1	8951161	8955160	RLOC_00002887	3	+	3.5	2.5	0.846	0.938	204	274
1	8962116	8965340	RLOC_00002890	12	+	11.9	7.6	0.371	0.656	65	120
1	8976325	8978305	RLOC_00002893	9	+	8.8	-8.3	0.0381	0.235	415	122
1	8981555	8983314	RLOC_00002894	9	-	8.9	-5.0	0.492	0.75	882	77
1	9002237	9004716	RLOC_00002897	17	-	16.5	8.3	0.0713	0.316	89	132
1	9024326	9027955	RLOC_00002904	13	-	12.6	12.6	0.177	0.465	303	397
1	9038707	9043861	RLOC_00002908	57	-	56.7	-56.6	0.0375	0.233	93	99
1	9044421	9047049	RLOC_00002909	29	-	28.9	19.0	0.0373	0.232	61	106
1	9054672	9057020	RLOC_00002911	25	+	25.1	25.1	0.0357	0.225	60	94
1	9063270	9075307	RLOC_00002913	467	-	466.9	-457.4	0.152	0.437	139	154
1	9066280	9068693	RLOC_00002914	8	+	8.0	-8.0	0.164	0.449	70	101
1	9070892	9075586	RLOC_00002916	27	+	27.0	2.9	0.238	0.529	86	155
1	9089468	9092560	RLOC_00002922	8	-	8.0	-8.0	0.336	0.626	121	77
1	9095767	9099768	RLOC_00002923	112	-	111.9	-111.5	0.165	0.45	55	56
1	9113866	9114994	RLOC_00002928	9	+	8.9	2.8	0.486	0.746	61	64
1	9121421	9125578	RLOC_00002932	43	-	43.3	18.0	0.165	0.45	29	46
1	9151627	9154762	RLOC_00002941	16	+	16.0	12.6	0.398	0.679	73	87
1	9155090	9156370	RLOC_00002942	13	+	13.3	-6.3	0.287	0.581	109	118
1	9171127	9173064	RLOC_00002952	4	+	3.7	-0.6	0.909	0.961	330	399
1	9178211	9181967	RLOC_00002954	16	+	15.9	15.7	0.447	0.717	107	156
1	9184566	9187578	RLOC_00002956	30	+	30.2	29.7	0.00722	0.0913	122	142
1	9205827	9207458	RLOC_00002961	7	+	7.0	5.5	2.59e-09	6.48e-07	3250	4043
1	9207342	9209902	RLOC_00002962	8	-	8.2	5.3	0.721	0.884	57	60
1	9210064	9214005	RLOC_00002963	272	+	271.5	265.9	0.0427	0.247	118	131
1	9214071	9215557	RLOC_00002964	3	+	2.6	2.5	0.0424	0.246	42	48
1	9215769	9218010	RLOC_00002965	8	+	8.4	7.6	0.0109	0.115	276	340
1	9224058	9225792	RLOC_00002967	6	-	6.3	2.6	0.102	0.369	54	52
1	9244952	9246633	RLOC_00002974	6	-	6.1	-4.2	0.878	0.949	83	121
1	9246755	9248292	RLOC_00002975	19	+	19.3	-19.3	0.0226	0.176	71	98
1	9250030	9251654	RLOC_00002978	11	-	10.6	-3.6	0.401	0.682	113	168
1	9259431	9261313	RLOC_00002982	8	+	7.8	6.8	0.244	0.534	99	180
1	9295640	9300796	RLOC_00002996	107	+	106.9	104.7	0.171	0.458	110	155
1	9300805	9304328	RLOC_00002997	8	-	8.2	6.9	0.0416	0.244	476	562
1	9315304	9318277	RLOC_00003000	24	-	24.0	23.0	1.69e-05	0.00109	755	939
1	9321659	9324395	RLOC_00003004	58	+	58.1	-54.0	0.225	0.514	71	113
1	9329383	9332148	RLOC_00003006	34	+	33.6	33.6	0.0021	0.041	318	182
1	9336056	9337938	RLOC_00003008	12	-	12.1	-10.9	0.236	0.527	27	34
1	9343113	9345323	RLOC_00003009	7	+	6.9	0.7	0.585	0.808	41	39
1	9351217	9352935	RLOC_00003010	3	+	3.1	-0.7	0.117	0.389	555	380
1	9373884	9376828	RLOC_00003016	3	+	3.2	-1.2	0.706	0.876	213	264
1	9393674	9396858	RLOC_00003022	97	+	96.6	83.5	0.414	0.693	61	103
1	9403752	9406369	RLOC_00003025	8	-	8.1	-6.5	0.46	0.726	367	417
1	9407084	9411368	RLOC_00003026	88	-	87.7	-75.3	0.0236	0.179	220	199
1	9425279	9426897	RLOC_00003030	9	+	9.2	1.1	0.245	0.535	267	223
1	9428991	9432307	RLOC_00003033	20	+	19.5	-9.9	0.182	0.469	81	85
1	9446596	9449046	RLOC_00003037	4	-	3.7	-2.0	0.148	0.432	187	171
1	9449293	9451777	RLOC_00003038	29	-	28.8	24.4	0.0939	0.355	54	47
1	9455276	9458176	RLOC_00003040	11	-	10.7	2.1	0.395	0.676	148	113
1	9481404	9482992	RLOC_00003053	3	+	2.5	2.3	0.609	0.822	473	259
1	9483127	9484686	RLOC_00003054	10	+	10.3	5.4	0.867	0.945	76	73
1	9484315	9486002	RLOC_00003056	5	-	5.2	4.9	0.183	0.47	390	487
1	9486888	9492632	RLOC_00003057	14	+	14.2	13.0	0.327	0.618	154	190
1	9492848	9494382	RLOC_00003058	3	+	2.6	-2.2	0.947	0.976	211	264
1	9495343	9498085	RLOC_00003059	5	+	5.5	2.3	0.474	0.736	96	110
1	9497999	9499639	RLOC_00003060	2	-	2.2	1.3	0.908	0.96	356	332
1	9508679	9512860	RLOC_00003063	14	-	13.7	6.2	0.933	0.969	153	220
1	9513080	9515050	RLOC_00003064	17	-	16.8	10.6	0.239	0.531	162	173
1	9515113	9517070	RLOC_00003065	4	+	3.5	3.1	0.642	0.84	872	1051
1	9520824	9527280	RLOC_00003068	4	-	4.2	1.2	0.84	0.936	60	58
1	9527455	9528866	RLOC_00003069	11	-	10.9	-1.0	0.254	0.546	210	219
1	9531808	9534141	RLOC_00003071	6	+	6.2	4.1	0.0763	0.327	441	524
1	9534499	9537728	RLOC_00003072	20	+	20.3	13.0	0.0156	0.143	58	109
1	9540021	9545040	RLOC_00003074	26	-	26.0	-25.5	0.214	0.505	43	46
1	9544409	9546285	RLOC_00003075	9	+	8.7	-2.7	0.92	0.964	86	152
1	9554709	9558461	RLOC_00003078	39	-	38.7	-28.7	0.186	0.472	103	139
1	9558561	9562485	RLOC_00003079	107	+	106.9	102.4	0.191	0.475	45	59
1	9562486	9564031	RLOC_00003080	5	-	5.4	-4.2	0.869	0.946	211	245
1	9565857	9567906	RLOC_00003082	55	-	55.0	-53.5	0.106	0.375	130	106
1	9574549	9575189	RLOC_00003088	4	+	4.4	-0.1	0.654	0.847	91	102
1	9592092	9603548	RLOC_00003091	2160	+	2159.9	2150.7	0.0113	0.118	61	50
1	9603525	9606247	RLOC_00003092	18	-	17.6	-15.9	0.714	0.88	84	77
1	9614550	9616574	RLOC_00003097	84	+	83.8	-81.7	1.54e-06	0.000163	239	229
1	9636587	9640225	RLOC_00003102	84	+	84.0	-80.2	0.252	0.544	161	185
1	9639858	9641911	RLOC_00003103	19	-	19.2	3.0	0.472	0.734	31	46
1	9662020	9667595	RLOC_00003109	128	+	128.4	-103.9	0.000472	0.014	55	65
1	9668507	9671657	RLOC_00003110	86	+	86.3	-51.8	0.15	0.435	142	152
1	9671631	9676307	RLOC_00003111	224	-	223.8	-202.0	0.247	0.538	74	72
1	9698297	9704013	RLOC_00003119	33	+	33.3	-8.5	0.246	0.537	78	84
1	9720727	9724800	RLOC_00003125	9	-	9.0	-8.1	0.884	0.952	30	43
1	9726606	9733000	RLOC_00003126	153	-	153.0	-140.4	0.138	0.419	206	257
1	9740583	9742497	RLOC_00003129	9	+	9.1	-8.4	0.00409	0.0627	1201	1631
1	9746708	9752775	RLOC_00003131	84	+	83.6	83.4	0.286	0.58	445	537
1	9763210	9768157	RLOC_00003136	196	+	195.6	-186.4	0.186	0.471	28	36
1	9778850	9784069	RLOC_00003141	86	+	85.7	-82.3	0.407	0.686	105	68
1	9795717	9799118	RLOC_00003143	10	+	10.2	5.6	0.826	0.931	31	43
1	9803063	9806887	RLOC_00003147	35	-	35.3	-27.2	0.267	0.56	37	41
1	9812929	9815565	RLOC_00003148	13	-	13.4	6.9	0.134	0.412	124	172
1	9825270	9828528	RLOC_00003149	27	+	26.7	-10.9	0.658	0.849	72	99
1	9829137	9834487	RLOC_00003150	33	-	33.0	-1.1	0.0338	0.219	220	286
1	9834641	9836210	RLOC_00003152	10	-	10.3	-6.4	0.713	0.879	245	275
1	9849843	9852449	RLOC_00003158	24	-	24.1	15.1	0.00478	0.0698	120	175
1	9868199	9872250	RLOC_00003162	90	-	89.6	-30.2	0.208	0.495	48	65
1	9874202	9875615	RLOC_00003163	6	+	5.8	3.1	0.496	0.753	93	97
1	9875466	9879433	RLOC_00003164	124	-	124.2	107.7	0.219	0.509	49	36
1	9884274	9887666	RLOC_00003168	35	-	34.6	-1.7	0.111	0.382	157	151
1	9889100	9891015	RLOC_00003169	4	-	3.5	1.0	0.112	0.383	321	357
1	9911796	9913957	RLOC_00003173	76	-	76.3	-38.1	0.173	0.462	37	49
1	9920144	9924484	RLOC_00003174	14	-	13.6	-1.1	0.2	0.486	65	53
1	9933732	9935440	RLOC_00003177	9	-	9.1	4.5	0.00633	0.0827	811	356
1	9940000	9943661	RLOC_00003180	13	+	13.0	9.9	0.328	0.618	106	99
1	9963447	9966320	RLOC_00003185	20	+	19.5	18.4	0.0141	0.134	74	119
1	9969309	9973893	RLOC_00003188	579	-	578.8	-574.8	4.86e-05	0.00236	295	429
1	9976140	9979793	RLOC_00003189	36	-	36.3	16.8	0.62	0.828	41	45
1	9979477	9987737	RLOC_00003190	224	+	224.1	-223.0	0.295	0.589	54	41
1	9996712	10000455	RLOC_00003193	21	+	21.5	21.5	0.00477	0.0697	165	232
1	10015898	10018160	RLOC_00003202	37	+	36.6	-27.7	0.403	0.684	85	88
1	10023816	10026311	RLOC_00003204	16	+	16.4	-14.7	0.112	0.383	67	88
1	10029062	10032032	RLOC_00003205	18	+	18.2	-15.6	0.32	0.611	82	95
1	10035666	10037662	RLOC_00003207	2	+	1.6	-0.0	0.941	0.973	69	79
1	10044336	10046552	RLOC_00003211	29	-	29.3	29.3	0.0944	0.356	104	172
1	10050936	10053218	RLOC_00003214	45	-	45.1	-27.9	0.0564	0.286	119	133
1	10053442	10055881	RLOC_00003215	77	-	76.5	-59.8	0.14	0.422	36	56
1	10074358	10076457	RLOC_00003221	14	-	14.0	-14.0	0.000124	0.00489	125	209
1	10078196	10081681	RLOC_00003223	21	+	20.7	-18.8	0.00938	0.106	67	55
1	10105024	10111744	RLOC_00003251	177	-	177.3	-168.6	0.369	0.655	111	89
1	10134055	10136241	RLOC_00003267	47	+	47.5	43.6	0.179	0.467	89	96
1	10136130	10139176	RLOC_00003270	95	-	94.9	-91.1	0.219	0.509	40	62
1	10147604	10151539	RLOC_00003272	6	+	6.2	5.4	0.669	0.856	1531	2063
1	10174186	10178521	RLOC_00003280	37	+	37.2	-28.4	0.54	0.781	120	117
1	10180301	10182808	RLOC_00003282	6	+	6.3	4.3	0.184	0.47	342	383
1	10223176	10224720	RLOC_00003293	5	-	5.3	4.1	0.453	0.721	272	349
1	10224814	10226322	RLOC_00003294	9	+	8.6	1.7	0.811	0.926	93	79
1	10236336	10237990	RLOC_00003296	17	+	17.5	-13.5	0.631	0.834	26	31
1	10252240	10254792	RLOC_00003299	11	+	10.6	8.8	0.146	0.429	100	133
1	10258212	10261232	RLOC_00003301	6	-	6.3	-4.5	0.835	0.934	54	53
1	10264042	10266917	RLOC_00003302	30	+	29.8	14.8	0.00335	0.0547	114	128
1	10268265	10273808	RLOC_00003303	13	-	13.3	2.7	0.752	0.901	203	253
1	10277747	10283515	RLOC_00003307	100	-	100.4	-93.7	0.104	0.372	192	244
1	10286066	10288103	RLOC_00003309	6	-	6.4	4.9	0.544	0.782	202	129
1	10288128	10289666	RLOC_00003310	12	-	11.6	-1.8	0.819	0.929	326	72
1	10289981	10294630	RLOC_00003311	10	-	10.2	2.2	0.543	0.782	271	166
1	10300200	10301457	RLOC_00003314	103	+	102.6	102.5	0.0432	0.248	256	383
1	10301376	10302099	RLOC_00003315	12	-	11.9	10.5	0.392	0.674	26	37
1	10302178	10303389	RLOC_00003317	10	-	9.8	7.1	0.234	0.525	206	211
1	10304269	10305348	RLOC_00003319	12	-	12.2	8.9	0.71	0.878	313	425
1	10305515	10306951	RLOC_00003320	22	-	21.6	-1.1	0.853	0.94	184	220
1	10307351	10308246	RLOC_00003321	4	-	4.3	-0.5	0.459	0.725	206	195
1	10308519	10309896	RLOC_00003322	9	+	8.7	5.1	0.741	0.897	391	271
1	10309264	10309404	RLOC_00003326	4	+	4.5	1.1	0.819	0.929	129	114
1	10310130	10314147	RLOC_00003327	10	-	9.6	2.6	0.13	0.406	416	461
1	10320988	10321968	RLOC_00003331	3	+	3.2	-2.3	0.355	0.643	329	309
1	10322516	10324836	RLOC_00003332	131	+	131.5	129.7	0.0386	0.235	245	274
1	10323339	10326817	RLOC_00003333	31	-	30.7	-30.6	0.306	0.598	52	59
1	10330425	10335698	RLOC_00003337	87	+	87.0	76.0	0.937	0.97	36	40
1	10371674	10374005	RLOC_00003346	12	+	12.3	4.4	0.00108	0.0264	687	1337
1	10375650	10377908	RLOC_00003347	4	+	3.7	-2.6	0.2	0.486	480	762
1	10378979	10382153	RLOC_00003349	6	-	5.8	-3.8	0.961	0.979	35	44
1	10384929	10387669	RLOC_00003351	4	-	4.1	0.8	0.619	0.828	204	309
1	10422291	10425801	RLOC_00003357	18	+	17.6	17.6	0.00436	0.0658	41	50
1	10424447	10429130	RLOC_00003358	49	-	49.4	-45.0	0.802	0.922	68	123
1	10429818	10432271	RLOC_00003360	32	+	31.9	23.5	0.173	0.46	60	74
1	10435213	10437770	RLOC_00003362	26	-	25.9	22.9	0.887	0.953	47	45
1	10445607	10447754	RLOC_00003365	33	-	33.0	11.3	0.85	0.939	31	33
1	10447346	10449969	RLOC_00003366	6	+	5.9	3.9	0.443	0.715	254	308
1	10459382	10462938	RLOC_00003369	6	-	6.2	4.2	0.575	0.802	253	328
1	10463098	10467626	RLOC_00003370	57	+	57.3	-53.6	0.606	0.82	75	67
1	10468010	10473420	RLOC_00003371	8	+	8.0	-3.0	0.737	0.894	234	289
1	10472185	10473502	RLOC_00003372	1	-	1.0	-0.8	0.685	0.864	23687	30637
1	10474112	10475997	RLOC_00003373	4	-	4.3	-2.3	0.0654	0.308	23251	32984
1	10477856	10479218	RLOC_00003374	1	+	1.1	0.0	0.284	0.577	58510	67337
1	10478012	10486818	RLOC_00003375	19	-	18.8	18.7	0.0197	0.162	58	54
1	10491556	10494603	RLOC_00003378	8	+	7.8	4.6	0.143	0.425	136	130
1	10498178	10501498	RLOC_00003381	132	-	131.8	125.4	0.0312	0.211	282	312
1	10503238	10506189	RLOC_00003382	9	-	8.6	-6.8	0.538	0.78	35	30
1	10507532	10509160	RLOC_00003383	4	+	3.8	-2.3	0.498	0.755	178	220
1	10509150	10512558	RLOC_00003384	9	-	8.6	-6.0	0.76	0.905	50	82
1	10546420	10548221	RLOC_00003391	12	-	12.4	7.1	0.0271	0.195	71	86
1	10559495	10561545	RLOC_00003393	11	-	11.5	11.4	0.0656	0.308	61	93
1	10584078	10586664	RLOC_00003396	38	-	38.4	-28.7	0.143	0.426	526	583
1	10587470	10590209	RLOC_00003397	14	+	13.9	10.3	0.525	0.771	73	73
1	10624993	10627176	RLOC_00003406	20	+	20.1	-16.9	0.262	0.553	69	74
1	10626649	10630630	RLOC_00003407	61	-	60.8	-49.2	0.331	0.621	130	117
1	10638877	10640963	RLOC_00003409	11	+	11.4	-11.4	0.0244	0.182	2043	2281
1	10650913	10651829	RLOC_00003412	6	+	6.2	4.9	0.965	0.981	65	75
1	10654799	10658924	RLOC_00003413	6	+	6.0	-4.8	0.853	0.94	91	86
1	10672972	10675455	RLOC_00003418	27	+	27.5	-25.6	0.02	0.163	29	32
1	10685821	10690988	RLOC_00003422	39	-	39.0	-37.6	0.689	0.867	103	98
1	10715481	10718997	RLOC_00003425	17	+	16.8	13.1	0.964	0.981	489	644
1	10722172	10725016	RLOC_00003427	3	+	3.1	-1.6	0.00905	0.104	12850	16068
1	10727316	10738108	RLOC_00003428	55	+	54.6	52.2	0.151	0.436	169	202
1	10758742	10762429	RLOC_00003432	22	+	22.2	-14.3	0.139	0.421	133	172
1	10762707	10770958	RLOC_00003433	104	+	104.4	-72.9	0.466	0.73	56	62
1	10779144	10786810	RLOC_00003437	67	+	66.6	-60.0	0.795	0.919	85	100
1	10789697	10792725	RLOC_00003440	16	+	15.6	5.9	0.85	0.939	52	59
1	10796123	10801093	RLOC_00003441	6	-	6.4	4.3	0.868	0.945	33	30
1	10803627	10806317	RLOC_00003442	22	-	22.2	-1.2	0.441	0.714	70	48
1	10806925	10809189	RLOC_00003443	13	-	12.5	12.5	0.0867	0.342	68	73
1	10810396	10813779	RLOC_00003445	7	+	6.5	-4.3	0.506	0.76	32	43
1	10814611	10816615	RLOC_00003447	12	+	11.8	-5.5	0.378	0.662	99	170
1	10828372	10831656	RLOC_00003452	4	+	4.0	-2.3	0.651	0.846	45	60
1	10829312	10840845	RLOC_00003453	288	-	287.5	287.0	0.00482	0.0701	438	541
1	10858174	10860280	RLOC_00003457	8	-	7.8	-4.8	0.321	0.612	265	307
1	10881478	10886472	RLOC_00003462	29	+	29.2	29.1	0.352	0.641	99	118
1	10887606	10890407	RLOC_00003463	11	+	11.3	11.0	0.422	0.698	152	234
1	10936764	10942292	RLOC_00003480	6	-	5.8	1.2	0.739	0.895	38	37
1	10944890	10949485	RLOC_00003483	37	-	36.7	13.0	0.631	0.834	188	90
1	10966889	10968949	RLOC_00003487	185	+	184.9	184.1	0.0179	0.153	51	53
1	10991291	10994209	RLOC_00003493	2	-	2.4	-0.9	0.891	0.955	580	601
1	10994242	10996223	RLOC_00003495	20	+	20.0	6.6	0.0852	0.341	74	106
1	11000883	11003618	RLOC_00003497	20	+	20.5	-19.7	0.155	0.44	78	82
1	11040249	11043773	RLOC_00003510	28	-	28.4	16.8	0.0139	0.133	79	57
1	11057104	11059037	RLOC_00003517	19	+	18.8	17.6	0.358	0.646	59	77
1	11084665	11088628	RLOC_00003522	5	+	4.9	2.9	0.727	0.887	51	56
1	11114692	11116195	RLOC_00003532	7	-	6.5	3.9	0.156	0.441	174	243
1	11122585	11124258	RLOC_00003535	8	-	8.0	-3.6	0.598	0.815	142	156
1	11133409	11135302	RLOC_00003538	7	+	6.8	1.2	0.61	0.823	284	364
1	11137239	11142726	RLOC_00003540	207	+	206.6	-177.7	0.662	0.852	70	52
1	11142460	11144725	RLOC_00003542	8	-	8.2	-6.4	0.17	0.456	227	248
1	11144743	11147628	RLOC_00003543	11	+	10.9	-10.2	0.25	0.542	137	202
1	11158539	11163470	RLOC_00003547	5	-	4.8	0.8	0.854	0.94	75	76
1	11170917	11172090	RLOC_00003554	15	+	15.4	14.8	0.00717	0.0908	151	155
1	11193345	11196426	RLOC_00003560	7	+	6.7	-3.2	0.542	0.781	102	187
1	11214675	11216141	RLOC_00003564	3	-	3.2	-1.1	2.16e-07	2.95e-05	17632	18234
1	11217694	11219618	RLOC_00003566	6	-	6.2	1.0	0.366	0.651	266	288
1	11246816	11249587	RLOC_00003575	86	-	85.8	-84.6	0.13	0.406	50	64
1	11249617	11253944	RLOC_00003576	17	+	17.2	16.1	0.128	0.404	235	382
1	11255807	11258832	RLOC_00003578	96	-	95.9	95.1	0.827	0.931	130	158
1	11273557	11276636	RLOC_00003583	80	-	80.0	-80.0	0.0699	0.314	49	64
1	11310782	11312132	RLOC_00003593	3	+	3.0	2.2	0.00193	0.0386	2035	2798
1	11312960	11316582	RLOC_00003594	126	-	126.0	124.0	0.142	0.425	52	49
1	11326246	11330791	RLOC_00003598	10	-	10.0	-1.2	0.821	0.929	51	76
1	11330923	11333540	RLOC_00003599	4	-	3.6	3.1	0.424	0.699	92	103
1	11349696	11355587	RLOC_00003602	63	+	62.9	-61.7	0.56	0.792	99	118
1	11356075	11365098	RLOC_00003603	109	+	108.9	-92.8	0.265	0.558	101	129
1	11391224	11394922	RLOC_00003609	27	+	26.8	14.6	0.621	0.828	72	111
1	11396142	11399779	RLOC_00003611	5	+	5.0	3.4	0.36	0.646	185	199
1	11410430	11414517	RLOC_00003613	4	-	3.7	0.3	0.473	0.735	2789	2634
1	11414694	11416444	RLOC_00003614	4	-	4.5	-1.8	0.995	0.997	69	84
1	11416445	11420998	RLOC_00003615	269	-	269.1	-269.1	0.124	0.397	78	76
1	11422625	11423712	RLOC_00003616	20	-	20.2	11.0	0.724	0.885	64	46
1	11430099	11434115	RLOC_00003618	10	+	9.9	8.9	0.32	0.611	48	67
1	11434059	11436607	RLOC_00003619	84	-	84.3	84.3	0.384	0.668	145	110
1	11436718	11440275	RLOC_00003620	55	+	55.4	52.9	0.0647	0.306	64	68
1	11456801	11463896	RLOC_00003624	70	+	70.1	67.4	0.24	0.531	298	329
1	11461854	11463857	RLOC_00003625	36	-	36.4	-36.2	0.0326	0.215	73	62
1	11464933	11469207	RLOC_00003626	9	+	9.1	-4.2	0.24	0.531	55	59
1	11469456	11470047	RLOC_00003627	7	+	7.3	6.9	0.398	0.68	60	55
1	11469984	11471462	RLOC_00003628	16	-	15.8	-15.8	0.00287	0.05	93	115
1	11479762	11482939	RLOC_00003634	20	+	19.7	-10.6	0.0998	0.364	239	257
1	11528384	11531350	RLOC_00003651	48	+	48.4	-30.1	0.0289	0.202	431	506
1	11532107	11534745	RLOC_00003652	4	+	3.7	3.2	0.00157	0.0336	3641	5953
1	11534157	11536435	RLOC_00003653	11	-	10.8	2.0	0.0374	0.232	272	277
1	11537241	11539896	RLOC_00003654	7	-	7.2	-4.6	0.109	0.38	720	1048
1	11539987	11544166	RLOC_00003655	105	-	105.2	-87.6	0.0528	0.277	48	37
1	11546159	11548016	RLOC_00003656	29	-	28.6	17.9	0.158	0.442	47	60
1	11558617	11561920	RLOC_00003660	18	-	18.4	12.5	0.0622	0.299	148	190
1	11565511	11570454	RLOC_00003662	89	+	89.3	87.7	0.0825	0.336	290	348
1	11575319	11578030	RLOC_00003663	11	+	10.9	10.9	0.12	0.392	54	26
1	11592922	11596056	RLOC_00003666	38	-	38.5	-36.5	0.824	0.93	57	47
1	11601670	11605174	RLOC_00003669	40	-	40.4	-35.1	0.0118	0.122	201	242
1	11605605	11607866	RLOC_00003670	12	-	12.5	-1.1	0.059	0.29	263	279
1	11607862	11610074	RLOC_00003671	3	+	3.1	-3.0	0.172	0.46	541	708
1	11611927	11617419	RLOC_00003673	10	+	10.2	-4.2	0.89	0.954	322	400
1	11640544	11641966	RLOC_00003676	11	-	10.6	9.4	0.246	0.536	45	42
1	11653499	11654833	RLOC_00003680	9	+	9.5	-9.5	0.0857	0.341	59	100
1	11672765	11675387	RLOC_00003687	15	+	15.0	11.9	0.000776	0.0204	89	109
1	11676944	11680862	RLOC_00003689	117	+	117.2	1.8	0.201	0.487	40	41
1	11681733	11684520	RLOC_00003691	20	+	19.7	16.4	0.0849	0.341	35	47
1	11684616	11686099	RLOC_00003692	29	+	29.5	-3.7	0.784	0.916	42	32
1	11689063	11691588	RLOC_00003695	7	-	6.6	4.8	0.211	0.5	415	552
1	11693631	11695575	RLOC_00003696	3	+	3.0	0.3	0.694	0.869	123	137
1	11712054	11716431	RLOC_00003701	5	+	4.8	-2.4	0.768	0.908	92	126
1	11738156	11739386	RLOC_00003703	5	+	5.0	-4.0	0.164	0.448	212	258
1	11738296	11740435	RLOC_00003704	1	-	1.0	-0.8	0.804	0.923	1420	2170
1	11742023	11754385	RLOC_00003706	120	-	120.1	112.6	0.607	0.821	256	297
1	11757098	11762650	RLOC_00003709	54	-	53.7	45.6	0.294	0.589	170	219
1	11767395	11770049	RLOC_00003710	20	+	20.3	20.2	0.663	0.852	79	61
1	11771620	11774294	RLOC_00003711	15	-	15.3	-15.3	0.0322	0.214	223	271
1	11774493	11775580	RLOC_00003712	17	+	17.4	9.0	0.522	0.769	61	54
1	11783542	11785704	RLOC_00003716	7	+	7.0	0.5	0.45	0.72	224	269
1	11785805	11788286	RLOC_00003717	43	+	43.5	20.7	0.794	0.919	28	29
1	11798118	11801407	RLOC_00003723	7	-	6.6	2.9	0.293	0.588	134	215
1	11827358	11829933	RLOC_00003729	15	+	14.7	12.6	0.0545	0.281	429	165
1	11846134	11856752	RLOC_00003735	922	-	921.7	-913.2	0.0256	0.188	43	49
1	11869789	11877555	RLOC_00003740	47	-	46.9	46.1	0.645	0.842	349	393
1	11881310	11886099	RLOC_00003742	6	+	6.5	5.3	0.183	0.47	69	71
1	11920337	11923827	RLOC_00003751	36	-	35.9	-35.9	0.0216	0.17	640	698
1	11928756	11929993	RLOC_00003755	3	+	3.3	2.5	0.421	0.698	501	215
1	11931148	11931801	RLOC_00003756	4	+	3.6	-1.0	0.986	0.991	85	38
1	11955655	11957402	RLOC_00003764	3	+	3.0	1.0	0.528	0.773	786	1041
1	11966480	11968004	RLOC_00003769	7	+	6.8	6.2	0.297	0.59	195	225
1	11967782	11972669	RLOC_00003770	1860	-	1859.6	1859.6	1.17e-05	0.000823	199	126
1	12004852	12008880	RLOC_00003777	32	+	32.1	-19.6	0.091	0.351	152	134
1	12010878	12012547	RLOC_00003778	23	+	22.8	-22.7	0.125	0.4	1749	2164
1	12023224	12024783	RLOC_00003781	5	+	5.1	-5.0	0.0244	0.182	2301	2804
1	12026958	12030892	RLOC_00003783	4	+	4.3	-2.9	0.873	0.947	94	122
1	12046378	12050095	RLOC_00003789	26	+	25.8	2.3	0.729	0.889	93	127
1	12050712	12054811	RLOC_00003790	572	-	571.7	-561.7	2.34e-07	3.15e-05	201	228
1	12057197	12059792	RLOC_00003793	18	-	17.9	13.6	0.143	0.425	51	119
1	12068035	12070455	RLOC_00003796	52	-	52.3	-49.4	0.142	0.425	74	84
1	12074098	12076289	RLOC_00003798	13	+	12.6	-11.4	0.178	0.466	66	98
1	12084905	12088993	RLOC_00003802	360	+	359.9	-357.5	0.0225	0.175	89	89
1	12109560	12118864	RLOC_00003812	115	-	115.4	-114.2	0.2	0.485	48	55
1	12144433	12147247	RLOC_00003819	6	+	6.4	3.5	0.264	0.556	115	203
1	12150666	12152460	RLOC_00003822	20	-	20.0	-17.7	0.108	0.378	89	78
1	12157053	12159125	RLOC_00003825	15	-	15.3	-6.6	0.95	0.976	80	99
1	12177672	12179628	RLOC_00003832	10	+	10.0	1.0	0.135	0.414	174	110
1	12180482	12184528	RLOC_00003833	88	+	88.2	2.7	0.0239	0.18	131	58
1	12203929	12208769	RLOC_00003842	34	+	33.5	-31.8	0.209	0.496	97	116
1	12244559	12246231	RLOC_00003855	5	-	4.7	1.3	0.632	0.835	134	128
1	12256406	12260638	RLOC_00003857	6	+	6.2	-0.2	0.969	0.983	29	40
1	12264941	12266920	RLOC_00003859	10	+	9.6	-8.1	0.192	0.477	336	461
1	12267840	12269978	RLOC_00003860	73	+	73.3	42.7	0.762	0.906	145	255
1	12349290	12351318	RLOC_00003882	7	-	6.9	6.2	0.149	0.432	136	106
1	12351561	12355173	RLOC_00003883	10	+	10.2	8.3	0.757	0.903	102	89
1	12355541	12359228	RLOC_00003884	21	+	21.2	15.5	0.119	0.391	209	295
1	12357697	12359014	RLOC_00003885	3	-	2.6	-2.2	0.269	0.562	1167	1662
1	12359453	12361313	RLOC_00003886	15	-	15.3	-6.0	0.731	0.89	60	93
1	12366829	12370046	RLOC_00003889	14	+	13.8	-9.7	0.772	0.911	63	77
1	12369953	12371547	RLOC_00003890	4	-	4.1	3.8	0.131	0.407	794	948
1	12429845	12433236	RLOC_00003912	5	+	4.5	3.9	0.724	0.885	80	77
1	12451428	12454692	RLOC_00003918	16	+	15.8	-14.5	0.527	0.772	134	190
1	12455668	12457639	RLOC_00003919	80	+	80.2	-80.2	0.00294	0.0505	32	56
1	12458589	12463338	RLOC_00003920	11	+	10.9	-10.7	0.922	0.964	45	49
1	12462786	12466093	RLOC_00003921	44	-	43.6	-38.9	0.228	0.517	71	71
1	12520058	12524395	RLOC_00003935	17	+	17.4	1.6	0.843	0.937	88	78
1	12534394	12536158	RLOC_00003938	7	+	7.1	-7.0	0.582	0.805	63	66
1	12550338	12552674	RLOC_00003941	4	+	3.9	1.0	0.333	0.622	150	179
1	12582129	12582822	RLOC_00003949	2	+	1.7	0.2	0.439	0.712	298	251
1	12584277	12590228	RLOC_00003950	12	-	11.8	-3.2	0.821	0.929	269	283
1	12595109	12607157	RLOC_00003953	202	+	201.9	201.6	0.408	0.687	63	49
1	12646650	12652646	RLOC_00003966	4	-	3.7	-0.9	0.449	0.719	74	99
1	12654926	12656605	RLOC_00003968	64	-	64.3	-63.6	0.116	0.389	45	77
1	12686805	12688560	RLOC_00003976	16	-	15.8	-12.6	0.316	0.608	73	47
1	12743562	12745659	RLOC_00003988	28	-	28.2	19.1	0.24	0.531	88	107
1	12748550	12750513	RLOC_00003990	5	-	4.6	4.4	0.768	0.909	60	90
1	12840365	12850510	RLOC_00004034	63	+	63.5	63.5	0.587	0.809	69	85
1	12867080	12868890	RLOC_00004040	13	+	12.5	7.2	0.0416	0.244	344	354
1	12890403	12892955	RLOC_00004048	27	+	27.2	-25.9	0.151	0.436	99	119
1	12977667	12979948	RLOC_00004072	11	+	10.6	6.0	0.813	0.927	146	146
1	13026205	13027725	RLOC_00004088	5	+	5.4	-0.6	0.811	0.926	201	194
1	13030552	13031375	RLOC_00004090	3	-	3.1	3.1	0.292	0.586	56	52
1	13039659	13042172	RLOC_00004094	24	+	24.0	24.0	0.331	0.621	74	83
1	13051156	13055093	RLOC_00004098	101	-	101.1	101.1	0.0787	0.33	63	75
1	13071163	13074984	RLOC_00004103	104	+	103.9	10.8	0.47	0.732	50	59
1	13077825	13080265	RLOC_00004105	34	+	33.6	29.0	0.195	0.481	205	187
1	13115697	13117423	RLOC_00004114	11	-	11.0	7.3	0.532	0.777	58	77
1	13122081	13125328	RLOC_00004116	7	-	7.1	-0.6	0.534	0.778	359	414
1	13145598	13146870	RLOC_00004120	16	+	15.5	1.3	0.424	0.699	116	56
1	13156319	13158495	RLOC_00004124	7	+	7.4	2.6	0.189	0.475	170	187
1	13208707	13210465	RLOC_00004135	2	+	1.6	0.7	0.829	0.932	1476	1925
1	13225207	13227428	RLOC_00004140	3	+	2.6	-2.0	0.613	0.824	491	605
1	13277136	13280340	RLOC_00004149	29	-	29.1	28.8	0.269	0.562	43	79
1	13450131	13453683	RLOC_00004181	23	+	23.2	-20.9	0.842	0.937	83	131
1	13466675	13470936	RLOC_00004183	166	-	165.9	151.9	0.246	0.537	35	52
1	13533167	13544015	RLOC_00004200	7	+	6.6	-4.9	0.427	0.702	175	186
1	13640507	13643126	RLOC_00004216	6	+	5.5	2.2	0.453	0.721	33	39
1	13669410	13671213	RLOC_00004221	13	+	12.7	-7.5	0.228	0.517	114	157
1	13671781	13674242	RLOC_00004222	6	+	5.9	-5.3	0.244	0.535	312	413
1	13696001	13698739	RLOC_00004228	23	-	22.8	22.7	0.176	0.465	126	52
1	13700764	13703654	RLOC_00004229	7	+	6.7	4.5	0.418	0.696	98	89
1	13700772	13703572	RLOC_00004230	28	-	27.6	-13.0	0.176	0.464	119	117
1	13898186	13900899	RLOC_00004279	8	-	8.1	1.5	0.315	0.607	288	409
1	14024633	14026951	RLOC_00004311	14	+	13.7	-13.5	0.0209	0.167	559	625
1	14027195	14030550	RLOC_00004312	16	-	15.9	10.9	0.0821	0.336	41	49
1	14158478	14161976	RLOC_00004342	7	+	7.4	-3.8	0.00732	0.0922	1648	2638
1	14292894	14296222	RLOC_00004367	9	-	9.2	-4.4	0.432	0.706	36	53
1	15603537	15607955	RLOC_00004514	72	-	71.8	71.7	0.109	0.38	128	188
1	15650526	15652542	RLOC_00004521	6	-	5.9	-2.7	0.311	0.603	1320	1481
1	15891280	15894640	RLOC_00004576	11	+	11.3	-11.3	0.0722	0.317	47	60
1	15895196	15900105	RLOC_00004577	18	-	18.1	17.8	0.593	0.812	92	109
1	15936155	15938994	RLOC_00004581	39	+	39.3	-27.2	0.881	0.95	67	72
1	15973053	15979952	RLOC_00004592	62	+	61.6	-41.6	0.612	0.824	318	319
1	16125685	16129890	RLOC_00004628	87	+	87.4	87.4	1.57e-05	0.00102	5460	8723
1	16135629	16137550	RLOC_00004631	29	-	28.9	-1.8	0.516	0.764	88	152
1	16228188	16231254	RLOC_00004646	5	-	4.8	-2.5	0.514	0.764	95	92
1	16266552	16268945	RLOC_00004652	5	+	5.4	3.0	0.000646	0.018	2103	2916
1	16275036	16278726	RLOC_00004655	22	-	22.4	19.9	0.00168	0.0346	169	230
1	16397978	16399880	RLOC_00004677	9	-	8.7	-8.7	0.00654	0.085	456	566
1	16410371	16412736	RLOC_00004682	6	-	6.1	4.8	0.147	0.429	70	105
1	16425399	16430287	RLOC_00004689	204	-	203.5	-194.7	0.147	0.429	38	42
1	16467297	16470813	RLOC_00004698	14	+	14.0	3.9	0.204	0.49	524	756
1	16478141	16482880	RLOC_00004703	37	+	37.4	-28.0	0.36	0.647	131	144
1	16484211	16486327	RLOC_00004704	11	+	10.8	-1.3	0.341	0.63	181	189
1	16486090	16488466	RLOC_00004705	14	-	13.8	-12.1	0.00195	0.039	223	265
1	16575758	16576541	RLOC_00004728	8	+	7.5	-5.8	0.124	0.397	87	89
1	16616982	16622101	RLOC_00004738	8	+	8.4	-7.8	0.582	0.805	119	143
1	16620768	16624504	RLOC_00004739	7	-	6.9	-4.9	0.208	0.495	88	91
1	16646690	16648692	RLOC_00004745	6	+	6.2	4.0	0.218	0.509	208	228
1	16654004	16656063	RLOC_00004748	5	+	4.9	-0.3	0.62	0.828	97	104
1	16708003	16709713	RLOC_00004760	6	-	5.6	-4.2	0.121	0.393	354	557
1	16764371	16767704	RLOC_00004774	30	-	30.1	-14.0	0.888	0.954	52	61
1	16834209	16838562	RLOC_00004793	49	-	49.0	48.0	0.888	0.954	164	204
1	16848277	16851271	RLOC_00004796	26	-	25.8	-14.3	0.0161	0.146	793	930
1	16870220	16873427	RLOC_00004801	4	+	4.2	1.6	2.16e-07	2.95e-05	6309	9267
1	16892526	16896167	RLOC_00004806	45	+	44.6	10.2	0.403	0.684	86	81
1	16896651	16898645	RLOC_00004807	17	-	16.8	13.7	0.187	0.473	90	104
1	16907536	16909572	RLOC_00004808	4	-	4.2	0.0	0.512	0.763	195	216
1	16912125	16913641	RLOC_00004810	18	-	18.0	-17.9	0.0143	0.135	83	118
1	16913993	16917053	RLOC_00004811	10	-	9.7	3.8	0.6	0.816	38	52
1	16923439	16924821	RLOC_00004812	14	+	14.4	10.9	0.0262	0.191	119	171
1	16926296	16929196	RLOC_00004813	14	+	14.1	0.8	0.308	0.601	90	102
1	16939800	16942943	RLOC_00004815	15	+	15.4	2.5	0.505	0.759	77	69
1	16982796	16984515	RLOC_00004826	12	-	12.4	-3.9	0.266	0.559	259	299
1	16999533	17001871	RLOC_00004832	10	+	9.7	8.7	0.623	0.829	63	94
1	17009072	17011953	RLOC_00004836	9	+	9.2	8.8	0.12	0.392	278	286
1	17031210	17033316	RLOC_00004844	8	+	7.8	4.1	0.821	0.929	71	68
1	17065104	17069286	RLOC_00004852	4	+	3.8	-1.9	0.936	0.97	85	70
1	17074941	17076417	RLOC_00004854	3	-	2.9	1.1	0.951	0.977	144	195
1	17082876	17091405	RLOC_00004856	658	-	657.9	657.9	0.166	0.45	121	96
1	17095979	17098041	RLOC_00004861	20	-	20.3	-14.5	0.932	0.968	54	60
1	17123825	17129705	RLOC_00004865	134	+	133.9	-125.8	0.0128	0.127	279	327
1	17169462	17171559	RLOC_00004885	10	-	10.2	-9.8	0.268	0.561	182	241
1	17172120	17177060	RLOC_00004886	58	-	57.9	-40.8	0.822	0.929	57	71
1	17179264	17183064	RLOC_00004888	47	+	47.1	-41.5	5.86e-07	6.99e-05	751	864
1	17191379	17193333	RLOC_00004892	38	+	37.8	-29.4	0.13	0.406	259	404
1	17199313	17200841	RLOC_00004896	6	+	5.9	5.5	0.317	0.608	89	72
1	17252877	17253937	RLOC_00004906	66	+	66.0	-56.3	0.0264	0.192	48	27
1	17265585	17266824	RLOC_00004909	32	-	32.3	23.7	0.231	0.521	45	36
1	17275889	17277839	RLOC_00004913	8	-	7.7	7.2	0.427	0.702	37	56
1	17282748	17285749	RLOC_00004915	5	-	5.2	1.4	0.0168	0.148	1356	1941
1	17295569	17296326	RLOC_00004917	7	+	7.1	2.6	0.548	0.784	61	98
1	17297708	17298832	RLOC_00004919	7	-	7.4	-6.3	0.139	0.422	258	292
1	17306546	17308886	RLOC_00004922	68	+	68.1	68.1	0.0079	0.0959	34	41
1	17319118	17321202	RLOC_00004928	7	+	6.8	-2.3	0.899	0.956	99	125
1	17319550	17323484	RLOC_00004929	4	-	4.4	-1.9	0.985	0.991	315	342
1	17326529	17328772	RLOC_00004931	14	+	14.4	-11.2	0.331	0.621	32	32
1	17330818	17332336	RLOC_00004933	15	+	14.9	13.9	0.174	0.462	106	97
1	17341737	17344836	RLOC_00004937	4	+	3.8	3.4	0.581	0.805	100	82
1	17351013	17353923	RLOC_00004942	14	+	14.2	14.2	0.0032	0.0531	34	62
1	17382997	17383830	RLOC_00004950	23	+	23.0	22.5	0.013	0.128	62	87
1	17395498	17397307	RLOC_00004958	6	-	6.3	6.3	0.174	0.462	458	568
1	17424472	17427475	RLOC_00004969	66	+	66.1	-61.9	0.151	0.436	120	155
1	17432432	17435158	RLOC_00004972	5	+	5.0	3.6	0.582	0.805	131	101
1	17443178	17446763	RLOC_00004975	6	+	6.2	3.4	0.182	0.468	38	53
1	17451516	17454461	RLOC_00004976	11	+	11.4	10.9	0.604	0.82	220	267
1	17456986	17465195	RLOC_00004978	88	+	87.8	60.0	0.931	0.968	93	119
1	17484283	17486585	RLOC_00004984	4	+	3.5	2.0	0.896	0.956	82	112
1	17518046	17520129	RLOC_00004996	78	-	78.0	-76.3	0.174	0.462	104	137
1	17536620	17539719	RLOC_00005001	12	-	11.9	-7.2	0.693	0.869	47	48
1	17557090	17560331	RLOC_00005007	19	+	18.9	18.6	0.0111	0.116	69	59
1	17560928	17562940	RLOC_00005008	15	-	15.0	-11.4	0.323	0.614	147	89
1	17566566	17570516	RLOC_00005010	15	+	15.1	-9.6	0.748	0.9	125	157
1	17569255	17570249	RLOC_00005011	10	-	10.1	-5.7	0.804	0.923	34	60
1	17611904	17612613	RLOC_00005029	4	+	4.2	3.1	0.652	0.847	50	61
1	17613013	17614984	RLOC_00005030	10	-	9.6	-8.1	0.905	0.959	123	158
1	17647143	17651791	RLOC_00005037	19	-	18.9	-13.1	0.994	0.996	41	46
1	17675364	17683629	RLOC_00005044	401	-	400.7	400.7	0.0231	0.178	84	56
1	17686989	17688859	RLOC_00005045	41	+	41.4	-23.3	0.0317	0.212	153	149
1	17716151	17721891	RLOC_00005052	20	-	20.2	18.1	0.493	0.751	530	874
1	17769883	17773524	RLOC_00005062	51	-	51.2	-34.5	0.349	0.638	61	100
1	17780487	17781798	RLOC_00005064	2	+	2.0	0.7	0.74	0.896	41	121
1	17781987	17784211	RLOC_00005065	9	+	9.2	-9.2	0.0139	0.133	76	91
1	17786495	17789282	RLOC_00005068	13	-	13.3	-7.4	0.767	0.908	117	119
1	17788768	17792404	RLOC_00005069	240	+	239.8	-239.6	0.13	0.406	86	110
1	17796151	17798335	RLOC_00005072	10	-	10.5	-8.0	0.698	0.871	47	55
1	17798430	17802330	RLOC_00005074	37	+	36.7	36.5	0.0225	0.175	50	42
1	17805760	17808993	RLOC_00005076	19	+	19.2	-18.4	0.11	0.381	82	146
1	17808987	17812106	RLOC_00005077	9	-	8.9	-3.4	0.793	0.918	82	147
1	17847032	17848898	RLOC_00005086	5	+	4.5	-2.7	0.242	0.533	856	843
1	17854811	17855959	RLOC_00005089	9	-	8.7	-8.4	0.114	0.385	110	59
1	17867101	17868452	RLOC_00005093	5	+	5.4	4.6	0.898	0.956	1156	1460
1	17886035	17892632	RLOC_00005100	24	-	24.1	-0.9	0.343	0.632	286	241
1	17895783	17898813	RLOC_00005101	13	-	12.8	-7.7	0.577	0.804	135	151
1	17902620	17906873	RLOC_00005103	12	-	12.2	11.8	0.191	0.475	41	54
1	17906870	17908534	RLOC_00005104	7	+	7.4	6.8	0.0792	0.331	460	550
1	17908452	17910523	RLOC_00005105	5	-	5.4	4.6	0.651	0.846	404	521
1	17910778	17913636	RLOC_00005106	10	+	9.8	9.8	0.0382	0.235	54	85
1	17917950	17921225	RLOC_00005108	32	+	31.9	24.6	0.0101	0.111	73	148
1	17921885	17928954	RLOC_00005109	134	-	133.7	-124.1	0.67	0.857	45	45
1	17940049	17942867	RLOC_00005112	11	+	10.6	2.8	0.788	0.917	117	136
1	17945357	17951092	RLOC_00005114	53	+	52.8	-24.7	0.859	0.942	59	71
1	17953869	17957719	RLOC_00005117	5	-	4.7	-3.6	0.886	0.953	52	67
1	17965870	17970608	RLOC_00005123	7	+	6.7	-4.2	0.876	0.948	225	393
1	17970610	17973402	RLOC_00005125	31	-	30.9	30.8	0.198	0.483	65	87
1	17973641	17976663	RLOC_00005126	33	-	32.6	32.6	0.111	0.382	140	187
1	17981635	17983377	RLOC_00005128	4	-	3.8	2.8	0.869	0.945	290	339
1	17983533	17989163	RLOC_00005129	50	+	50.1	-39.9	0.796	0.919	78	80
1	17989104	17995326	RLOC_00005130	12	-	12.0	-8.8	0.677	0.86	74	113
1	18030705	18031608	RLOC_00005142	12	+	12.0	-6.5	0.56	0.792	37	62
1	18035854	18039399	RLOC_00005144	6	+	5.6	-4.2	0.858	0.941	135	215
1	18035966	18039405	RLOC_00005145	30	-	29.7	-8.9	0.037	0.231	42	53
1	18043671	18047806	RLOC_00005147	26	-	25.6	-25.6	0.349	0.638	72	114
1	18059449	18061302	RLOC_00005151	6	-	6.3	5.6	0.00831	0.0987	680	812
1	18061355	18065051	RLOC_00005152	69	+	69.1	69.1	0.297	0.59	49	50
1	18064882	18068163	RLOC_00005153	34	-	34.1	8.7	0.741	0.897	166	263
1	18068664	18071648	RLOC_00005154	6	-	5.8	5.6	0.432	0.706	154	196
1	18084696	18087934	RLOC_00005159	7	-	6.5	-5.8	0.415	0.693	143	150
1	18098094	18101767	RLOC_00005162	34	+	34.0	-31.5	1.53e-06	0.000163	950	781
1	18106238	18110396	RLOC_00005165	38	+	38.4	-25.1	0.17	0.456	65	57
1	18132544	18134017	RLOC_00005175	12	+	12.0	-9.5	0.742	0.897	65	71
1	18136665	18139060	RLOC_00005178	28	+	27.7	-27.6	0.0332	0.217	260	220
1	18150466	18153369	RLOC_00005180	22	+	22.3	21.6	0.894	0.955	34	45
1	18176622	18182510	RLOC_00005189	20	-	19.8	18.0	0.377	0.661	373	442
1	18183047	18187566	RLOC_00005191	162	-	162.3	160.0	0.244	0.535	55	45
1	18215799	18219269	RLOC_00005200	34	+	33.9	-32.4	0.443	0.715	766	984
1	18234678	18237543	RLOC_00005207	24	+	24.5	3.0	0.0676	0.311	179	203
1	18251989	18264672	RLOC_00005211	106	+	106.3	-54.4	0.781	0.915	76	83
1	18267129	18269465	RLOC_00005214	10	-	9.6	5.7	0.421	0.698	31	32
1	18276642	18279532	RLOC_00005219	26	+	26.0	8.0	0.268	0.561	136	171
1	18282902	18285365	RLOC_00005221	119	+	119.1	112.2	0.529	0.774	109	145
1	18283998	18286965	RLOC_00005222	30	-	30.1	-26.1	0.0688	0.313	336	388
1	18290941	18295905	RLOC_00005224	29	+	29.1	-27.1	0.513	0.763	67	114
1	18314099	18316861	RLOC_00005231	25	-	24.6	23.8	0.0031	0.0521	129	144
1	18320461	18322818	RLOC_00005234	11	-	11.3	-5.4	3.05e-09	7.44e-07	3510	2358
1	18326824	18328765	RLOC_00005235	8	+	8.1	-4.8	0.861	0.943	133	222
1	18333187	18337520	RLOC_00005237	12	-	11.8	8.0	0.122	0.395	32	29
1	18351323	18354634	RLOC_00005242	6	+	5.6	-2.2	0.884	0.951	52	45
1	18354743	18356988	RLOC_00005243	20	+	19.7	14.8	0.0384	0.235	52	65
1	18355996	18360447	RLOC_00005244	10	-	9.8	9.6	0.409	0.687	217	217
1	18367589	18375494	RLOC_00005248	186	-	186.3	134.9	0.234	0.525	43	48
1	18377059	18379998	RLOC_00005250	61	-	60.7	57.3	0.484	0.744	140	123
1	18380362	18386149	RLOC_00005251	19	-	18.8	-8.0	0.0927	0.353	85	80
1	18391174	18394008	RLOC_00005255	70	-	69.7	69.7	0.0746	0.323	43	54
1	18402121	18405620	RLOC_00005260	19	-	18.5	-17.0	0.0419	0.244	110	123
1	18407399	18410022	RLOC_00005261	200	+	200.0	174.9	0.9	0.957	60	99
1	18409653	18413040	RLOC_00005262	31	-	31.4	3.5	0.00515	0.0729	228	169
1	18416473	18420111	RLOC_00005263	22	+	21.7	20.6	4.45e-05	0.00222	224	240
1	18428787	18430497	RLOC_00005266	6	-	5.7	5.2	0.571	0.799	78	67
1	18442881	18445350	RLOC_00005271	4	+	3.6	2.9	0.493	0.751	66	65
1	18451745	18454463	RLOC_00005274	11	+	10.9	2.1	0.763	0.906	36	24
1	18454843	18456619	RLOC_00005275	16	-	15.5	-2.2	0.497	0.754	72	87
1	18470057	18473848	RLOC_00005279	10	+	9.5	8.7	0.159	0.444	44	64
1	18494064	18497318	RLOC_00005286	30	-	30.4	30.4	0.00114	0.0273	143	187
1	18500027	18504691	RLOC_00005288	6	-	5.6	4.1	0.448	0.718	717	726
1	18504805	18506270	RLOC_00005289	10	+	9.7	1.2	0.08	0.332	350	446
1	18517556	18520624	RLOC_00005293	5	+	4.8	-1.0	0.344	0.634	894	868
1	18519075	18521913	RLOC_00005295	6	-	5.6	-4.5	0.354	0.642	505	722
1	18522247	18539995	RLOC_00005296	626	-	625.9	625.1	0.0229	0.177	38	40
1	18547373	18550110	RLOC_00005299	214	-	214.0	136.1	0.0145	0.137	59	53
1	18561801	18566427	RLOC_00005306	145	+	144.8	-106.3	0.0967	0.359	58	64
1	18569500	18579175	RLOC_00005308	48	-	47.7	-47.4	0.85	0.939	42	40
1	18581997	18587256	RLOC_00005310	28	+	28.1	26.0	0.957	0.978	93	104
1	18591154	18598523	RLOC_00005312	31	-	31.2	30.5	0.0774	0.328	375	484
1	18614200	18617155	RLOC_00005316	9	-	8.8	6.0	0.0243	0.182	644	1031
1	18617532	18626441	RLOC_00005317	613	-	613.0	-613.0	0.367	0.653	45	35
1	18627410	18632039	RLOC_00005319	115	-	114.9	114.0	0.175	0.463	84	81
1	18637662	18639544	RLOC_00005322	5	-	5.0	-2.4	0.107	0.376	614	968
1	18658507	18662052	RLOC_00005330	9	+	9.1	8.9	0.11	0.38	125	155
1	18662265	18666515	RLOC_00005331	5	+	5.3	-1.4	0.967	0.981	49	78
1	18672131	18677712	RLOC_00005334	54	+	53.8	41.3	0.0787	0.33	32	42
1	18681912	18685968	RLOC_00005336	6	-	5.7	-5.2	0.421	0.698	174	158
1	18685292	18687907	RLOC_00005337	22	+	22.0	11.5	0.741	0.897	58	54
1	18687784	18690503	RLOC_00005339	13	-	13.1	0.3	0.028	0.199	133	201
1	18693649	18697713	RLOC_00005341	41	+	41.3	-10.2	0.462	0.728	42	141
1	18701881	18704943	RLOC_00005343	4	+	4.4	-1.6	0.376	0.661	306	394
1	18704163	18706589	RLOC_00005344	8	-	8.2	4.6	0.0714	0.316	44	51
1	18716122	18721285	RLOC_00005346	136	+	136.2	135.0	0.19	0.475	51	57
1	18724143	18728400	RLOC_00005349	24	-	24.4	22.6	0.792	0.918	109	102
1	18728633	18730498	RLOC_00005352	9	-	9.0	-4.1	0.204	0.49	51	68
1	18737062	18739649	RLOC_00005355	16	-	16.2	-15.6	0.0972	0.36	159	169
1	18748249	18751460	RLOC_00005357	34	+	33.6	33.6	0.776	0.913	31	34
1	18756223	18758595	RLOC_00005360	15	-	15.4	12.0	0.505	0.759	200	149
1	18770936	18774759	RLOC_00005363	7	+	7.3	2.9	0.79	0.918	92	107
1	18774768	18777069	RLOC_00005365	7	-	7.4	3.5	0.586	0.808	113	163
1	18784461	18787824	RLOC_00005370	11	-	10.6	9.5	0.218	0.509	53	42
1	18795187	18802375	RLOC_00005373	894	+	893.8	889.0	0.0621	0.299	40	43
1	18802551	18803755	RLOC_00005374	5	+	5.4	-4.0	0.588	0.809	182	398
1	18807683	18815537	RLOC_00005376	3	+	3.5	-3.0	0.625	0.83	66	70
1	18839046	18844595	RLOC_00005386	27	+	27.0	-19.2	0.2	0.486	91	90
1	18866142	18867533	RLOC_00005392	3	+	3.0	-2.9	0.238	0.529	661	779
1	18870058	18872974	RLOC_00005395	6	+	6.3	-2.4	0.108	0.378	381	414
1	18877796	18880001	RLOC_00005397	29	-	28.6	4.9	0.0667	0.31	45	45
1	18926887	18931045	RLOC_00005413	50	+	49.9	-49.8	0.499	0.755	370	520
1	18934278	18937717	RLOC_00005417	80	+	80.1	-71.4	0.33	0.621	309	405
1	18943446	18945812	RLOC_00005420	18	-	17.6	-11.0	0.757	0.903	54	75
1	18949531	18951891	RLOC_00005422	14	+	14.2	-4.6	0.08	0.332	167	160
1	18953457	18955053	RLOC_00005423	5	-	4.6	3.0	0.733	0.891	50	47
1	18984280	18986653	RLOC_00005429	7	+	6.6	6.6	4.16e-05	0.0021	1479	1769
1	19018925	19021807	RLOC_00005439	6	-	5.7	-0.8	0.635	0.837	46	86
1	19044160	19047518	RLOC_00005445	389	+	389.0	-382.3	0.032	0.213	58	63
1	19047835	19053535	RLOC_00005446	144	+	143.5	-142.9	0.271	0.563	59	74
1	19051673	19053731	RLOC_00005447	3	-	3.0	-2.3	0.00154	0.0335	5390	6085
1	19068240	19069855	RLOC_00005450	23	+	22.9	18.3	0.0215	0.17	74	56
1	19074333	19076571	RLOC_00005452	13	+	12.7	9.8	0.549	0.784	24	34
1	19097711	19101265	RLOC_00005457	9	-	9.4	5.7	0.931	0.968	327	393
1	19102790	19104933	RLOC_00005458	10	-	10.4	-7.1	0.438	0.711	227	246
1	19115550	19117554	RLOC_00005462	3	+	2.9	-1.6	0.725	0.886	61	70
1	19117031	19119382	RLOC_00005463	16	-	15.8	-14.4	0.467	0.73	31	26
1	19119593	19122038	RLOC_00005465	12	-	11.9	-4.4	0.159	0.443	50	70
1	19122053	19126709	RLOC_00005466	18	-	18.0	-11.5	0.27	0.563	266	323
1	19125576	19128307	RLOC_00005467	53	+	52.8	-51.8	0.167	0.452	42	50
1	19128055	19132335	RLOC_00005468	11	-	11.1	1.9	0.169	0.456	68	68
1	19132295	19135840	RLOC_00005470	34	+	34.0	34.0	0.0424	0.246	60	52
1	19141259	19144323	RLOC_00005473	19	-	19.4	-7.9	0.255	0.547	134	148
1	19152507	19154051	RLOC_00005476	5	+	4.9	-3.9	0.409	0.687	658	778
1	19154302	19158749	RLOC_00005477	214	+	213.8	-211.3	0.142	0.425	37	58
1	19158722	19161729	RLOC_00005478	4	-	4.5	-3.9	0.804	0.923	295	294
1	19163842	19170458	RLOC_00005479	66	+	66.0	-36.0	0.0757	0.326	123	109
1	19175608	19180195	RLOC_00005482	8	-	7.5	6.3	0.199	0.484	102	137
1	19180757	19186549	RLOC_00005483	122	+	121.8	-119.6	0.127	0.402	59	56
1	19186397	19188795	RLOC_00005484	5	-	5.4	-4.4	0.874	0.948	129	167
1	19188798	19191372	RLOC_00005485	27	+	27.0	-24.8	0.56	0.792	29	38
1	19199332	19201707	RLOC_00005488	18	+	18.1	-16.5	0.522	0.768	94	107
1	19220235	19225797	RLOC_00005494	122	-	121.5	-19.6	0.157	0.441	99	141
1	19295819	19299171	RLOC_00005511	4	-	4.2	-2.0	0.876	0.948	69	67
1	19305080	19307518	RLOC_00005513	8	+	7.6	2.1	0.385	0.669	141	203
1	19323054	19326918	RLOC_00005517	8	-	7.9	7.2	0.00662	0.0856	290	343
1	19333046	19336129	RLOC_00005519	39	-	39.2	34.5	0.0552	0.282	613	584
1	19350313	19352791	RLOC_00005523	16	-	16.2	16.1	0.243	0.534	235	104
1	19383077	19385602	RLOC_00005533	34	-	33.7	31.7	0.0259	0.189	159	376
1	19407258	19408319	RLOC_00005537	9	-	9.0	8.8	0.286	0.58	56	59
1	19434488	19439078	RLOC_00005546	93	+	93.2	-61.7	0.00283	0.0497	438	272
1	19439366	19443627	RLOC_00005547	20	-	20.5	-19.6	0.384	0.669	51	28
1	19453379	19454704	RLOC_00005550	2	-	2.5	2.2	0.0591	0.29	1404	1572
1	19454798	19456499	RLOC_00005551	5	+	5.3	0.1	0.045	0.253	7391	10429
1	19467930	19472568	RLOC_00005556	149	-	148.7	-144.9	0.179	0.467	106	144
1	19474774	19476239	RLOC_00005557	3	-	3.2	0.2	0.00223	0.0423	1818	2461
1	19478052	19482875	RLOC_00005558	333	+	333.1	332.9	0.0326	0.215	55	60
1	19484277	19487997	RLOC_00005559	22	+	22.1	18.5	0.244	0.534	53	55
1	19489788	19493069	RLOC_00005562	155	-	154.6	154.4	0.0345	0.221	380	381
1	19496460	19497720	RLOC_00005566	10	+	10.1	-8.9	0.225	0.514	65	69
1	19499145	19506309	RLOC_00005568	43	+	42.9	42.2	0.493	0.751	89	107
1	19506355	19508935	RLOC_00005569	6	+	6.2	4.8	0.828	0.932	36	55
1	19508937	19511641	RLOC_00005570	10	+	10.5	4.0	0.112	0.383	70	135
1	19514722	19518411	RLOC_00005572	5	+	4.6	-1.8	0.142	0.425	2530	1265
1	19520602	19525693	RLOC_00005573	4	+	4.1	3.7	0.785	0.916	156	177
1	19527821	19531443	RLOC_00005575	7	+	6.5	-6.3	0.895	0.955	79	120
1	19559799	19565274	RLOC_00005583	105	-	105.1	-99.1	0.00164	0.0343	313	359
1	19572731	19574057	RLOC_00005590	11	-	11.2	-0.5	0.791	0.918	66	71
1	19588996	19590288	RLOC_00005596	5	-	4.5	-1.9	0.538	0.78	147	227
1	19590432	19592755	RLOC_00005597	22	+	21.7	21.7	0.00235	0.0438	110	155
1	19614930	19617611	RLOC_00005611	4	-	3.9	0.0	0.824	0.93	157	166
1	19619723	19620844	RLOC_00005613	5	+	4.8	4.4	0.556	0.79	101	190
1	19640524	19641665	RLOC_00005618	6	+	6.4	-1.2	0.577	0.804	98	88
1	19642465	19646561	RLOC_00005619	23	+	23.0	22.8	0.235	0.526	871	1149
1	19651171	19652825	RLOC_00005621	6	+	6.3	1.4	0.176	0.465	105	155
1	19669007	19671952	RLOC_00005628	223	-	223.3	210.6	0.000611	0.0173	267	162
1	19685544	19688028	RLOC_00005635	2	+	2.0	-0.6	0.777	0.913	454	543
1	19687688	19690553	RLOC_00005636	21	-	20.6	10.9	0.747	0.9	41	45
1	19706046	19706885	RLOC_00005640	6	+	5.8	-3.7	0.279	0.572	144	155
1	19711178	19713308	RLOC_00005644	24	+	23.7	-2.6	0.121	0.394	96	105
1	19737414	19740368	RLOC_00005651	3	+	2.6	1.5	0.778	0.914	199	195
1	19744947	19747287	RLOC_00005653	10	-	9.9	0.7	0.654	0.847	93	132
1	19760000	19761496	RLOC_00005658	16	-	15.6	15.6	0.0153	0.142	65	69
1	19764244	19767495	RLOC_00005660	29	-	29.0	-26.1	0.693	0.869	26	28
1	19771915	19775818	RLOC_00005661	31	+	30.7	-26.4	0.405	0.685	65	73
1	19783343	19787363	RLOC_00005665	22	+	22.4	-22.4	0.151	0.436	57	92
1	19792738	19794787	RLOC_00005668	6	+	5.8	3.3	0.385	0.669	61	79
1	19820564	19822262	RLOC_00005677	23	-	23.2	4.7	0.132	0.41	95	109
1	19844449	19847856	RLOC_00005681	8	+	8.2	5.7	0.00687	0.0878	707	1042
1	19849691	19851934	RLOC_00005683	12	-	12.2	4.8	0.215	0.505	82	125
1	19854560	19857138	RLOC_00005685	7	-	6.6	6.5	0.00675	0.0867	567	794
1	19864694	19867389	RLOC_00005690	46	-	46.1	-45.2	0.0687	0.313	88	121
1	19871115	19873804	RLOC_00005693	25	+	24.9	-23.2	0.0489	0.265	47	77
1	19879430	19882975	RLOC_00005694	12	+	12.3	-4.7	0.219	0.509	55	58
1	19883919	19888413	RLOC_00005695	9	-	8.9	-5.1	0.759	0.905	120	131
1	19890934	19893504	RLOC_00005696	5	-	4.8	2.0	0.145	0.428	156	148
1	19912960	19916686	RLOC_00005704	6	-	6.5	0.3	0.741	0.897	55	82
1	19924666	19926713	RLOC_00005706	14	+	13.6	13.1	0.00751	0.0935	173	172
1	19934986	19941212	RLOC_00005710	484	+	483.6	-482.3	0.0851	0.341	30	41
1	19945810	19951729	RLOC_00005711	30	+	29.9	26.2	0.98	0.988	41	35
1	19947629	19956804	RLOC_00005712	274	-	273.6	-273.2	0.253	0.544	95	93
1	19962769	19964712	RLOC_00005715	6	-	6.2	0.0	0.671	0.858	184	218
1	19966923	19969757	RLOC_00005717	7	-	6.8	3.8	0.391	0.673	112	179
1	19970559	19975337	RLOC_00005719	28	-	28.1	-23.6	0.486	0.746	96	150
1	19976354	19978048	RLOC_00005720	2	-	2.4	1.1	0.798	0.921	65	77
1	19978100	19980125	RLOC_00005721	7	+	7.5	-5.1	0.755	0.902	37	57
1	19981373	19982307	RLOC_00005723	19	+	18.6	9.4	0.509	0.762	58	79
1	19984541	19986112	RLOC_00005727	3	-	2.9	-2.4	0.299	0.592	179	193
1	19987109	19991214	RLOC_00005728	4	+	3.6	-0.6	0.97	0.983	99	121
1	19991270	19993458	RLOC_00005729	23	-	22.8	16.5	5.56e-06	0.00046	268	285
1	19996204	20000782	RLOC_00005730	9	+	8.9	8.0	0.729	0.888	51	63
1	20026015	20028756	RLOC_00005744	31	-	30.5	30.5	0.0186	0.157	54	63
1	20028895	20031596	RLOC_00005745	10	-	10.1	-1.2	0.778	0.914	35	34
1	20036565	20039301	RLOC_00005748	6	+	6.4	-5.7	0.668	0.856	535	706
1	20061404	20065713	RLOC_00005755	20	+	20.4	-20.4	0.444	0.716	84	130
1	20065393	20068500	RLOC_00005756	4	-	3.7	0.9	0.402	0.682	354	470
1	20068964	20071171	RLOC_00005757	8	-	7.7	6.1	0.748	0.9	39	38
1	20073972	20079022	RLOC_00005759	279	-	279.0	224.9	0.379	0.663	75	65
1	20081643	20084551	RLOC_00005761	5	+	4.5	0.5	0.491	0.75	109	151
1	20101298	20103690	RLOC_00005768	10	+	9.9	7.2	0.402	0.682	229	304
1	20103755	20106077	RLOC_00005769	2	-	2.4	2.2	0.858	0.941	192	256
1	20111930	20113960	RLOC_00005772	92	+	91.9	-74.3	0.000997	0.0247	288	56
1	20114919	20118585	RLOC_00005773	15	+	15.2	2.7	0.975	0.986	134	126
1	20124705	20126588	RLOC_00005776	92	+	91.9	-77.9	0.000506	0.0148	287	56
1	20127478	20131065	RLOC_00005777	15	+	15.2	2.7	0.977	0.987	134	126
1	20134843	20137013	RLOC_00005779	4	+	3.9	1.7	0.81	0.926	276	267
1	20158554	20160872	RLOC_00005790	20	-	19.6	-13.3	0.771	0.91	351	464
1	20167593	20169762	RLOC_00005792	5	+	4.8	4.2	0.261	0.553	166	175
1	20169738	20173949	RLOC_00005793	26	-	25.6	20.2	0.807	0.924	136	274
1	20179356	20180566	RLOC_00005794	117	-	116.6	-106.2	0.844	0.937	62	57
1	20180609	20182374	RLOC_00005795	13	+	12.7	-12.4	0.294	0.589	109	107
1	20183544	20187096	RLOC_00005797	11	-	11.4	5.1	0.0311	0.211	214	252
1	20189471	20191900	RLOC_00005798	7	+	6.6	-4.5	0.436	0.71	76	76
1	20194711	20199193	RLOC_00005800	57	-	56.9	-47.6	0.462	0.728	375	347
1	20201797	20204431	RLOC_00005802	37	+	36.7	11.0	0.07	0.314	80	93
1	20206993	20207714	RLOC_00005803	8	+	8.0	-2.1	0.613	0.824	68	42
1	20210800	20214041	RLOC_00005804	17	+	17.0	16.0	0.0845	0.339	254	153
1	20213888	20215277	RLOC_00005805	9	-	8.6	-8.6	0.258	0.55	43	60
1	20215432	20218699	RLOC_00005806	31	+	31.1	0.2	0.755	0.902	34	51
1	20221004	20226055	RLOC_00005808	10	-	9.6	6.7	0.609	0.822	47	68
1	20235691	20237620	RLOC_00005811	51	+	51.1	44.2	0.0697	0.314	38	69
1	20241225	20242665	RLOC_00005812	13	+	13.2	-12.4	0.136	0.415	68	84
1	20246025	20250356	RLOC_00005815	48	-	47.5	47.5	0.00211	0.041	32	47
1	20254937	20256688	RLOC_00005818	8	+	8.2	-7.9	0.358	0.646	54	79
1	20256916	20262279	RLOC_00005819	20	+	20.5	-19.6	0.753	0.902	479	660
1	20268473	20270140	RLOC_00005822	12	-	11.7	11.1	0.00514	0.0729	116	136
1	20273588	20275999	RLOC_00005824	16	+	15.8	-15.7	0.0339	0.219	53	60
1	20275533	20277981	RLOC_00005825	4	-	3.6	2.5	0.405	0.685	144	195
1	20283416	20293355	RLOC_00005827	303	+	303.5	302.8	0.214	0.505	199	260
1	20293138	20297257	RLOC_00005830	30	-	29.6	-21.8	0.813	0.927	62	63
1	20297754	20300979	RLOC_00005832	158	-	157.8	157.2	0.102	0.367	35	51
1	20304514	20307110	RLOC_00005834	16	-	16.2	8.0	0.78	0.914	60	66
1	20309472	20310850	RLOC_00005836	4	-	4.2	3.6	0.00779	0.0952	3041	1802
1	20340561	20343547	RLOC_00005843	17	-	17.0	12.5	0.0316	0.212	88	88
1	20350122	20358026	RLOC_00005846	101	+	100.9	74.4	0.259	0.551	90	86
1	20356953	20357879	RLOC_00005847	2	-	1.8	-1.2	0.669	0.856	672	1243
1	20363302	20366140	RLOC_00005849	6	+	6.2	-3.3	0.824	0.93	336	418
1	20380400	20385380	RLOC_00005854	6	-	5.5	3.4	0.819	0.929	28	28
1	20389346	20391147	RLOC_00005856	11	+	10.7	5.2	0.00657	0.0851	471	507
1	20393663	20397295	RLOC_00005859	213	-	213.4	213.4	0.0386	0.235	117	103
1	20401356	20403166	RLOC_00005861	8	-	8.3	6.4	0.00143	0.0318	558	616
1	20414315	20415287	RLOC_00005868	4	-	3.7	-0.4	0.291	0.586	188	211
1	20416657	20421156	RLOC_00005871	52	-	52.1	-29.9	0.131	0.407	57	42
1	20424331	20430220	RLOC_00005874	83	+	83.1	-59.6	0.717	0.881	62	52
1	20430601	20432031	RLOC_00005875	10	+	10.2	-8.4	0.167	0.452	195	147
1	20433846	20437349	RLOC_00005877	108	+	107.7	-103.1	0.0771	0.328	67	66
1	20439369	20445022	RLOC_00005879	4	+	4.2	-0.9	0.0788	0.33	1815	2376
1	20447156	20450963	RLOC_00005881	96	+	96.1	95.6	0.348	0.637	79	114
1	20451082	20452699	RLOC_00005882	3	+	3.3	-1.3	0.836	0.935	101	121
1	20458951	20460647	RLOC_00005887	2	+	1.7	-0.2	0.674	0.858	59	129
1	20470677	20475202	RLOC_00005890	4	+	4.0	2.4	0.926	0.966	89	95
1	20511330	20513691	RLOC_00005906	4	+	4.5	2.1	0.704	0.874	74	86
1	20514625	20516551	RLOC_00005907	6	+	6.3	5.5	0.279	0.572	147	194
1	20525635	20530468	RLOC_00005909	5	+	5.3	2.8	0.457	0.724	32	70
1	20554360	20558628	RLOC_00005917	18	+	18.2	7.6	0.0417	0.244	83	112
1	20560196	20563581	RLOC_00005919	22	-	22.5	21.7	0.522	0.768	72	71
1	20572326	20574364	RLOC_00005922	8	-	7.8	2.7	0.643	0.84	114	156
1	20574473	20577351	RLOC_00005923	7	+	6.5	-4.0	0.936	0.97	51	66
1	20577372	20579059	RLOC_00005924	17	-	16.6	-2.0	0.484	0.744	79	93
1	20577376	20580010	RLOC_00005925	26	+	26.1	25.0	0.161	0.445	118	137
1	20580285	20588304	RLOC_00005926	1163	+	1163.0	-1141.4	0.023	0.177	28	54
1	20588355	20589251	RLOC_00005930	6	+	6.4	5.1	0.497	0.754	75	94
1	20597711	20598747	RLOC_00005933	23	-	23.1	21.7	0.0146	0.137	107	159
1	20614572	20616525	RLOC_00005939	19	+	19.3	19.3	0.00563	0.0773	286	336
1	20617080	20620136	RLOC_00005940	31	-	30.8	-30.0	0.244	0.534	69	69
1	20627906	20629692	RLOC_00005945	36	-	36.4	36.4	0.139	0.421	40	54
1	20629697	20633007	RLOC_00005946	5	+	5.2	3.9	0.379	0.664	113	114
1	20637379	20649102	RLOC_00005948	99	+	99.5	0.6	0.609	0.823	46	44
1	20648089	20649029	RLOC_00005949	1	-	1.3	-0.1	0.632	0.835	1103	2250
1	20651813	20653764	RLOC_00005950	23	+	23.4	18.1	0.334	0.624	72	78
1	20653739	20665110	RLOC_00005951	2	-	1.6	1.5	0.953	0.977	60	66
1	20666165	20668850	RLOC_00005952	13	-	13.0	1.8	0.0487	0.265	285	323
1	20673767	20676449	RLOC_00005954	62	+	61.7	17.2	0.0559	0.284	97	109
1	20703902	20707106	RLOC_00005962	9	-	9.3	4.4	0.818	0.929	73	87
1	20707306	20709027	RLOC_00005963	28	+	27.7	-27.3	0.421	0.698	74	75
1	20711443	20715593	RLOC_00005965	12	+	11.6	-10.6	0.614	0.825	522	898
1	20715562	20719261	RLOC_00005966	7	-	7.1	-7.1	0.0592	0.29	602	720
1	20719472	20722856	RLOC_00005967	18	+	17.5	-16.6	0.359	0.646	78	50
1	20723278	20725747	RLOC_00005968	18	+	17.9	-13.3	0.472	0.734	44	45
1	20725469	20728091	RLOC_00005969	7	-	6.7	2.5	0.475	0.736	94	90
1	20729124	20731356	RLOC_00005971	15	-	15.3	12.5	0.813	0.927	95	89
1	20731588	20734066	RLOC_00005972	41	-	41.2	-24.4	0.937	0.97	34	40
1	20787015	20791194	RLOC_00005985	80	-	79.9	-75.4	0.882	0.95	34	43
1	20802496	20803610	RLOC_00005991	3	-	3.1	-2.8	1.44e-08	2.57e-06	13895	16117
1	20803631	20807947	RLOC_00005993	60	-	60.1	-48.4	0.0709	0.316	341	362
1	20808198	20813061	RLOC_00005994	82	-	81.5	-80.8	0.49	0.749	35	60
1	20856481	20859475	RLOC_00006006	12	-	11.8	-10.9	0.186	0.471	126	207
1	20860506	20867780	RLOC_00006007	125	+	125.0	-79.8	0.568	0.797	63	79
1	20873424	20876346	RLOC_00006009	5	+	5.4	-4.8	0.24	0.531	148	229
1	20876503	20880260	RLOC_00006010	28	+	28.1	-20.7	0.3	0.593	65	70
1	20879400	20893248	RLOC_00006011	50	-	50.0	10.4	0.847	0.938	65	82
1	20898352	20901184	RLOC_00006015	91	-	90.8	-90.5	0.0195	0.161	50	54
1	20901325	20902921	RLOC_00006016	6	+	6.3	-2.1	0.832	0.933	89	98
1	20903052	20910952	RLOC_00006017	152	+	152.4	-118.4	0.403	0.683	158	221
1	20912114	20913597	RLOC_00006019	18	+	18.2	-16.2	0.0113	0.118	115	162
1	20918678	20922786	RLOC_00006021	8	+	7.6	5.3	0.708	0.876	39	32
1	20927557	20930185	RLOC_00006027	5	-	5.2	-4.3	0.533	0.777	311	469
1	20944111	20949323	RLOC_00006032	145	+	145.4	-145.4	0.000833	0.0213	89	155
1	20962569	20963546	RLOC_00006037	1	+	0.7	-0.0	0.857	0.941	1688	1207
1	20963682	20966468	RLOC_00006038	12	+	12.4	12.4	0.442	0.714	88	148
1	20967651	20971742	RLOC_00006040	11	-	10.9	10.7	0.476	0.738	2149	2777
1	20984272	20986952	RLOC_00006046	192	-	191.9	-188.3	1.23e-09	3.23e-07	262	146
1	21022539	21028066	RLOC_00006053	133	-	133.2	-102.0	0.374	0.659	66	78
1	21024481	21025902	RLOC_00006054	2	+	2.0	1.5	0.779	0.914	78	88
1	21028136	21030684	RLOC_00006055	6	+	6.3	-1.2	0.752	0.901	260	330
1	21030781	21032229	RLOC_00006056	5	+	4.9	-4.7	0.00184	0.037	645	763
1	21035596	21037316	RLOC_00006057	12	+	11.6	3.3	0.434	0.708	40	34
1	21042950	21044998	RLOC_00006058	9	+	9.0	4.2	0.5	0.755	2252	1307
1	21072811	21074903	RLOC_00006071	9	-	8.8	8.8	3.21e-09	7.67e-07	2569	2688
1	21075258	21078826	RLOC_00006072	10	+	10.3	-2.6	0.333	0.623	39	39
1	21085547	21088581	RLOC_00006075	27	-	26.8	26.8	0.000478	0.0141	565	657
1	21089564	21092709	RLOC_00006076	4	-	3.9	3.1	0.791	0.918	495	562
1	21128911	21130939	RLOC_00006088	8	+	8.2	2.5	0.747	0.9	52	58
1	21141632	21144458	RLOC_00006091	3	+	3.4	-0.9	0.642	0.84	288	348
1	21146238	21150262	RLOC_00006092	6	+	5.8	-4.8	0.388	0.671	55	61
1	21159728	21174311	RLOC_00006095	593	+	593.0	-584.5	0.0343	0.221	356	480
1	21192136	21195190	RLOC_00006102	37	+	36.5	35.0	0.271	0.563	65	75
1	21198003	21199126	RLOC_00006104	4	-	3.7	-0.4	0.1	0.365	848	871
1	21201940	21204856	RLOC_00006105	12	-	11.7	8.6	0.159	0.443	61	91
1	21206908	21209699	RLOC_00006106	22	+	22.0	21.2	0.217	0.509	210	109
1	21211718	21214562	RLOC_00006109	10	+	10.2	9.9	0.133	0.412	43	43
1	21213624	21215407	RLOC_00006110	28	-	27.8	-25.8	0.57	0.798	31	34
1	21253696	21258836	RLOC_00006119	9	+	9.0	-7.3	0.877	0.948	172	229
1	21263343	21266469	RLOC_00006123	3	-	3.0	-2.5	0.43	0.706	58	90
1	21309260	21311514	RLOC_00006207	31	-	31.4	-22.3	0.388	0.671	66	58
1	21327354	21334737	RLOC_00006214	869	-	869.5	-867.5	0.0496	0.267	35	22
1	21337107	21339167	RLOC_00006215	16	-	16.0	15.7	0.0933	0.355	48	68
1	21342626	21344804	RLOC_00006217	10	+	10.4	9.3	0.324	0.615	86	111
1	21355477	21356647	RLOC_00006221	2	+	2.3	0.7	0.3	0.593	1071	1409
1	21362358	21364749	RLOC_00006223	4	-	4.0	-2.9	0.557	0.79	248	475
1	21377319	21380382	RLOC_00006227	8	+	7.6	6.4	0.00155	0.0335	991	1133
1	21393076	21394986	RLOC_00006232	5	+	5.2	-3.2	0.449	0.719	116	119
1	21395095	21398300	RLOC_00006233	18	+	18.3	-17.9	0.541	0.781	156	251
1	21429825	21430910	RLOC_00006246	2	-	2.4	1.7	0.339	0.629	978	1308
1	21431050	21436329	RLOC_00006247	60	-	60.3	48.7	0.718	0.882	62	36
1	21441178	21443036	RLOC_00006251	24	-	23.6	9.7	0.711	0.879	79	134
1	21463984	21468525	RLOC_00006256	6	-	5.7	-0.2	0.759	0.905	163	212
1	21504298	21507679	RLOC_00006264	4	-	4.2	1.6	0.371	0.655	287	308
1	21512331	21514189	RLOC_00006266	32	-	32.4	32.0	0.000504	0.0147	82	153
1	21515404	21518270	RLOC_00006267	5	-	5.0	-4.8	0.862	0.943	51	73
1	21537576	21540038	RLOC_00006275	94	-	93.5	-87.7	0.0204	0.165	152	111
1	21548116	21553266	RLOC_00006277	30	-	30.3	30.0	0.372	0.656	94	81
1	21566056	21579249	RLOC_00006283	1197	+	1196.7	-1196.7	0.00539	0.0748	35	30
1	21579621	21581165	RLOC_00006284	40	-	40.1	36.2	0.145	0.428	89	117
1	21587059	21601740	RLOC_00006289	178	-	177.5	67.9	0.941	0.972	46	38
1	21611802	21614188	RLOC_00006292	137	-	137.0	-126.0	2.38e-07	3.16e-05	535	637
1	21620301	21622611	RLOC_00006297	8	-	7.9	-6.4	0.351	0.641	62	62
1	21623622	21626404	RLOC_00006298	21	-	20.7	20.7	0.00018	0.00659	972	1329
1	21662844	21667721	RLOC_00006305	114	-	113.7	-90.5	0.139	0.421	36	46
1	21676387	21680519	RLOC_00006306	10	+	10.1	9.3	0.969	0.983	243	399
1	21688934	21690290	RLOC_00006308	44	+	44.0	42.4	0.686	0.864	457	516
1	21713829	21717378	RLOC_00006315	23	-	23.4	-23.2	0.0723	0.317	96	117
1	21729912	21738846	RLOC_00006320	57	+	57.2	-56.9	0.458	0.725	41	71
1	21746237	21766048	RLOC_00006322	2813	+	2813.1	-2813.1	2.8e-06	0.000256	90	100
1	21769673	21771303	RLOC_00006325	6	-	5.5	5.5	0.00378	0.0598	1831	2152
1	21780118	21802054	RLOC_00006328	1663	+	1662.5	-1614.9	0.000856	0.0218	338	458
1	21805931	21807496	RLOC_00006331	6	-	5.5	5.5	0.00446	0.0666	1831	2152
1	21816333	21820868	RLOC_00006334	246	+	245.8	-204.3	0.02	0.163	157	261
1	21827946	21838312	RLOC_00006336	800	+	800.3	-624.3	6.81e-05	0.00303	180	200
1	21842189	21843819	RLOC_00006339	6	-	5.5	5.5	0.0037	0.0589	1831	2152
1	21884013	21886049	RLOC_00006352	9	+	9.2	6.9	0.394	0.675	72	91
1	21889635	21892056	RLOC_00006354	10	-	10.5	4.2	0.55	0.786	25	41
1	21893141	21901086	RLOC_00006355	8	+	7.9	7.5	0.0577	0.289	164	153
1	21936277	21938001	RLOC_00006366	23	+	23.1	-5.2	0.0689	0.313	199	211
1	21938366	21940450	RLOC_00006367	4	+	4.4	-2.7	0.932	0.968	36	98
1	21979266	21984504	RLOC_00006375	11	+	11.2	9.2	0.0715	0.316	138	152
1	21984383	21990286	RLOC_00006376	8	-	7.8	3.5	0.297	0.59	52	49
1	22011304	22020400	RLOC_00006383	139	+	138.8	134.8	0.22	0.511	52	50
1	22020432	22022570	RLOC_00006384	4	-	4.3	0.7	0.302	0.594	124	134
1	22026479	22030554	RLOC_00006387	146	+	145.9	-145.9	0.0046	0.0681	82	179
1	22034422	22040126	RLOC_00006392	18	+	18.3	17.6	0.552	0.787	259	243
1	22043642	22051114	RLOC_00006395	76	+	76.5	-50.7	0.311	0.603	39	44
1	22051132	22053962	RLOC_00006396	15	+	14.5	13.8	0.138	0.419	278	401
1	22053854	22057267	RLOC_00006397	10	-	10.3	-5.7	0.881	0.95	44	47
1	22090216	22094802	RLOC_00006408	24	-	24.4	21.9	0.754	0.902	486	618
1	22095250	22096624	RLOC_00006409	5	-	5.2	-3.6	0.227	0.517	384	409
1	22140807	22149604	RLOC_00006416	33	-	32.5	-7.9	0.0717	0.317	129	155
1	22176933	22181740	RLOC_00006424	65	-	65.3	-46.2	0.0573	0.288	98	107
1	22188040	22191560	RLOC_00006426	36	-	36.1	-33.7	0.487	0.747	88	95
1	22192759	22195433	RLOC_00006427	15	+	15.5	14.6	0.488	0.748	124	140
1	22197910	22205356	RLOC_00006429	74	-	73.6	-73.6	0.0142	0.134	67	78
1	22211971	22214411	RLOC_00006432	8	-	8.0	7.4	0.436	0.711	53	75
1	22218730	22221433	RLOC_00006435	256	-	256.4	-256.3	0.0588	0.29	35	51
1	22261724	22264414	RLOC_00006452	1	+	1.1	0.7	0.795	0.919	85	86
1	22264372	22266162	RLOC_00006454	2	-	2.4	-0.6	0.756	0.903	52	47
1	22266415	22269258	RLOC_00006455	24	-	23.7	-21.7	0.395	0.676	51	48
1	22285416	22290356	RLOC_00006461	108	-	108.0	-103.2	0.292	0.587	62	60
1	22305778	22308296	RLOC_00006471	36	-	35.5	-34.5	0.459	0.725	141	172
1	22314084	22317077	RLOC_00006476	11	-	11.0	10.5	0.499	0.755	61	108
1	22324436	22327359	RLOC_00006477	34	-	33.9	30.5	0.174	0.462	55	96
1	22337213	22339736	RLOC_00006482	3	-	3.0	0.9	0.95	0.976	52	55
1	22339808	22342354	RLOC_00006483	13	+	13.2	-12.1	0.844	0.937	57	61
1	22342289	22343269	RLOC_00006484	10	-	10.2	-10.2	0.147	0.43	140	132
1	22343615	22347671	RLOC_00006485	279	+	278.8	-256.1	0.0819	0.335	38	42
1	22349793	22354511	RLOC_00006488	192	-	192.2	-112.6	0.453	0.721	40	38
1	22354697	22356875	RLOC_00006489	14	-	13.9	12.3	0.153	0.438	234	299
1	22365393	22368766	RLOC_00006494	9	-	8.5	-3.0	0.606	0.82	67	73
1	22368939	22372223	RLOC_00006496	25	-	24.9	4.7	0.00494	0.0709	216	259
1	22378101	22382422	RLOC_00006498	7	-	7.2	-4.9	0.627	0.831	43	41
1	22383392	22387853	RLOC_00006499	5	-	5.0	4.1	0.354	0.642	118	157
1	22388474	22391237	RLOC_00006500	13	-	13.5	-12.1	0.124	0.398	50	71
1	22409297	22410854	RLOC_00006509	10	+	10.0	-2.7	0.31	0.602	254	233
1	22423893	22428066	RLOC_00006512	20	+	20.0	18.4	0.325	0.615	77	87
1	22439062	22442221	RLOC_00006517	22	-	22.1	-4.9	0.027	0.195	200	265
1	22444391	22446693	RLOC_00006518	6	+	6.1	-6.1	3.8e-05	0.00195	11778	17481
1	22461911	22465433	RLOC_00006526	137	-	137.5	134.3	0.00808	0.0968	56	78
1	22462091	22463014	RLOC_00006527	14	+	14.2	-14.2	0.142	0.424	49	53
1	22465517	22477846	RLOC_00006528	797	-	797.1	789.7	0.105	0.373	135	156
1	22483103	22485969	RLOC_00006530	25	+	24.7	6.2	0.0294	0.204	52	60
1	22508518	22512333	RLOC_00006540	10	-	10.3	-6.0	0.302	0.594	72	93
1	22534662	22540935	RLOC_00006546	168	-	168.3	-165.2	0.203	0.489	31	29
1	22542401	22545661	RLOC_00006547	21	+	21.0	-3.7	0.0135	0.13	139	131
1	22549522	22550711	RLOC_00006550	12	+	12.3	-11.0	0.42	0.698	34	43
1	22551270	22554684	RLOC_00006551	47	+	46.8	46.8	0.0381	0.235	45	54
1	22555704	22560842	RLOC_00006552	49	+	48.6	32.1	0.365	0.651	121	156
1	22564358	22572029	RLOC_00006554	251	+	251.1	-250.7	0.141	0.424	32	53
1	22581354	22585276	RLOC_00006558	6	+	5.5	1.0	0.956	0.978	40	43
1	22585751	22588969	RLOC_00006559	10	+	10.1	6.7	0.547	0.784	211	254
1	22607432	22612036	RLOC_00006565	203	-	203.4	-203.4	0.00199	0.0395	77	58
1	22633773	22636101	RLOC_00006572	22	+	21.8	-21.5	0.431	0.706	36	56
1	22699714	22701465	RLOC_00006588	2	+	1.9	-0.2	1.29e-06	0.000141	22436	25737
1	22718461	22719535	RLOC_00006598	5	-	4.9	-0.2	0.586	0.808	198	216
1	22720559	22723152	RLOC_00006600	74	-	73.6	-37.3	0.54	0.78	166	148
1	22737474	22739443	RLOC_00006607	10	+	10.4	5.6	0.14	0.422	126	188
1	22753601	22756371	RLOC_00006615	90	-	90.4	-76.5	0.184	0.47	91	65
1	22769363	22772767	RLOC_00006618	19	+	18.9	7.1	0.825	0.931	81	117
1	22782426	22786942	RLOC_00006623	8	-	7.6	2.9	0.917	0.963	43	69
1	22793169	22794714	RLOC_00006627	5	-	5.4	4.2	0.872	0.947	121	155
1	22798020	22801416	RLOC_00006628	14	-	14.1	-9.6	0.513	0.763	306	374
1	22810110	22812677	RLOC_00006631	8	+	7.9	-5.4	0.235	0.526	93	124
1	22812572	22814162	RLOC_00006632	3	-	2.8	-0.5	0.698	0.871	254	364
1	22814313	22816880	RLOC_00006633	18	+	18.0	17.8	0.121	0.394	340	367
1	22862843	22866635	RLOC_00006643	98	-	98.2	-98.2	0.0458	0.256	80	119
1	22867688	22871358	RLOC_00006646	66	-	65.9	65.9	0.252	0.544	89	76
1	22882083	22885115	RLOC_00006647	5	-	5.1	0.4	0.421	0.698	121	229
1	22908017	22910878	RLOC_00006655	86	+	85.7	-81.0	0.0857	0.341	32	40
1	22911052	22914142	RLOC_00006656	17	+	16.8	9.5	0.537	0.78	64	66
1	22919486	22924029	RLOC_00006660	17	+	17.3	14.4	0.0235	0.179	102	158
1	22931621	22934549	RLOC_00006664	49	+	48.5	47.4	0.363	0.65	222	228
1	22935994	22939070	RLOC_00006666	78	-	77.7	-73.5	0.179	0.466	39	42
1	22975529	22977885	RLOC_00006681	4	-	3.6	-0.5	0.689	0.867	422	607
1	22980933	22984391	RLOC_00006683	13	-	12.7	-1.5	0.0857	0.341	43	48
1	22994439	22999959	RLOC_00006690	16	-	15.5	-12.3	0.242	0.532	99	180
1	23032346	23039763	RLOC_00006702	247	-	246.6	-236.6	0.563	0.795	28	24
1	23046767	23050337	RLOC_00006705	27	+	26.8	25.3	0.0357	0.225	47	49
1	23082140	23087118	RLOC_00006713	3	+	3.0	2.2	0.0947	0.356	2049	1678
1	23084292	23087141	RLOC_00006714	13	-	12.7	11.6	0.00564	0.0773	312	325
1	23100118	23101335	RLOC_00006718	11	-	10.9	2.6	0.774	0.912	46	48
1	23105904	23109534	RLOC_00006720	26	-	25.9	25.9	0.00151	0.0331	117	111
1	23128647	23129840	RLOC_00006724	4	+	4.1	-1.6	0.102	0.367	635	505
1	23131927	23133507	RLOC_00006726	22	+	21.6	18.8	0.941	0.972	46	52
1	23136279	23137358	RLOC_00006727	1	-	1.1	-0.8	0.142	0.424	2575	4735
1	23179450	23185151	RLOC_00006739	281	+	281.1	259.1	0.142	0.425	54	61
1	23192145	23195111	RLOC_00006742	9	+	9.0	5.1	0.317	0.608	72	92
1	23199611	23203823	RLOC_00006744	35	+	34.7	2.6	0.128	0.403	126	185
1	23223729	23227180	RLOC_00006751	26	-	26.1	22.9	0.965	0.981	45	44
1	23230921	23233543	RLOC_00006755	23	+	23.3	-23.3	0.094	0.355	91	102
1	23233127	23236528	RLOC_00006756	5	-	4.7	-1.8	0.145	0.429	1210	2004
1	23249144	23251195	RLOC_00006760	11	-	10.5	-2.8	0.297	0.591	245	396
1	23252139	23253771	RLOC_00006761	34	+	34.2	31.7	0.0532	0.278	63	115
1	23253679	23264401	RLOC_00006763	446	-	446.0	444.0	0.201	0.487	193	166
1	23271589	23274328	RLOC_00006769	20	-	19.7	-19.7	0.0126	0.126	81	87
1	23291905	23295564	RLOC_00006772	57	+	57.0	54.1	0.425	0.7	41	45
1	23316712	23320427	RLOC_00006783	8	-	7.6	4.6	0.743	0.898	98	179
1	23342210	23344120	RLOC_00006790	6	+	5.9	-1.3	0.562	0.794	153	196
1	23347560	23352831	RLOC_00006791	37	-	37.2	37.2	0.00121	0.0286	73	111
1	23387573	23392856	RLOC_00006800	236	-	236.3	236.3	0.215	0.506	66	63
1	23404687	23408119	RLOC_00006803	37	+	36.7	-35.5	0.104	0.372	93	103
1	23408772	23411145	RLOC_00006804	9	-	8.6	7.9	0.243	0.534	66	82
1	23425353	23427456	RLOC_00006810	78	+	78.3	25.1	0.543	0.782	93	145
1	23427404	23429652	RLOC_00006811	22	-	21.8	-21.7	0.228	0.517	50	56
1	23448811	23450530	RLOC_00006817	7	+	7.3	0.1	0.595	0.814	49	47
1	23466679	23469289	RLOC_00006824	9	-	9.3	1.0	0.328	0.619	62	93
1	23469517	23475517	RLOC_00006825	187	-	186.8	-186.6	0.179	0.467	167	184
1	23498469	23502316	RLOC_00006834	275	-	274.9	-274.5	0.0254	0.188	43	60
1	23515679	23518960	RLOC_00006840	42	+	42.3	-6.8	0.152	0.436	49	70
1	23522448	23526832	RLOC_00006841	37	+	36.5	36.5	0.103	0.371	45	54
1	23534945	23536506	RLOC_00006843	6	+	5.9	4.6	0.603	0.819	52	46
1	23536465	23539244	RLOC_00006844	22	-	21.6	-21.6	0.135	0.414	37	37
1	23555398	23558917	RLOC_00006847	12	+	12.3	9.8	0.0184	0.156	83	129
1	23583195	23585784	RLOC_00006860	5	-	5.1	2.6	0.248	0.538	100	132
1	23603790	23607275	RLOC_00006865	6	-	6.2	3.4	0.967	0.982	119	128
1	23607356	23610777	RLOC_00006866	38	-	37.8	2.4	0.626	0.831	43	76
1	23614339	23622402	RLOC_00006867	288	+	288.2	-262.3	0.177	0.465	205	257
1	23624594	23630060	RLOC_00006868	10	-	10.3	4.1	0.672	0.858	60	81
1	23657498	23667357	RLOC_00006877	320	-	319.9	319.9	0.0858	0.341	474	593
1	23667557	23669145	RLOC_00006880	20	-	20.0	20.0	0.000537	0.0156	140	153
1	23685092	23687374	RLOC_00006883	5	+	5.5	3.3	0.244	0.535	181	162
1	23696552	23701012	RLOC_00006887	130	-	130.3	-91.5	0.666	0.854	33	27
1	23696707	23700250	RLOC_00006888	100	+	100.2	-4.9	0.00713	0.0905	37	75
1	23707130	23716108	RLOC_00006891	302	-	301.8	-263.9	0.0294	0.204	83	81
1	23716642	23719480	RLOC_00006892	19	+	19.0	16.8	0.446	0.717	86	137
1	23729874	23733974	RLOC_00006896	45	+	45.3	45.3	0.0113	0.118	138	171
1	23738640	23740390	RLOC_00006899	3	-	3.1	2.6	0.514	0.764	370	506
1	23740482	23743411	RLOC_00006900	71	+	71.3	-56.3	0.0646	0.305	289	350
1	23758240	23760663	RLOC_00006906	6	-	6.2	-0.6	0.491	0.75	151	185
1	23762258	23766168	RLOC_00006907	14	+	13.9	11.1	0.00565	0.0773	63	63
1	23789061	23791229	RLOC_00006912	23	+	23.4	21.4	2.28e-05	0.00139	375	464
1	23791584	23796652	RLOC_00006913	55	+	55.2	-55.1	0.159	0.443	37	48
1	23803627	23807168	RLOC_00006918	8	-	7.7	-7.1	0.036	0.227	212	216
1	23808834	23812725	RLOC_00006920	138	-	138.3	136.4	0.671	0.857	73	85
1	23821439	23825434	RLOC_00006923	133	+	133.4	-132.5	0.338	0.627	37	33
1	23825264	23827114	RLOC_00006924	8	-	8.3	2.3	0.447	0.718	125	171
1	23827468	23830113	RLOC_00006926	6	-	6.4	-2.0	0.959	0.979	176	266
[truncated: 8,503 more rows]
