# Supplementary material for: Widespread premature transcription termination of Arabidopsis thaliana NLR genes by the spen protein FPA
Source: eLife. 2021 Apr 27;10:e65537. doi: 10.7554/eLife.65537 (PMC8116057; doi:10.7554/eLife.65537)
Supplement: Figure 2—source data 4. [file elife-65537-fig2-data4.tds]

1	5885	13714	RLOC_00000002	120	-	120.3	112.7	0.353	0.826	189	272
1	23139	31249	RLOC_00000004	141	+	140.9	-134.6	0.224	0.72	212	271
1	31115	33315	RLOC_00000006	10	-	10.0	-9.0	0.0901	0.645	511	869
1	33364	37871	RLOC_00000008	38	-	38.3	23.2	0.901	1	116	80
1	44797	49306	RLOC_00000011	134	-	133.5	-121.1	1	1	917	1555
1	49908	51210	RLOC_00000012	4	-	4.2	4.1	0.000312	0.00877	3390	5733
1	57163	59215	RLOC_00000014	9	-	9.3	-9.2	0.187	0.694	253	457
1	61904	67705	RLOC_00000015	64	-	64.3	28.1	1	1	568	722
1	72315	74250	RLOC_00000017	25	+	24.7	-17.5	0.142	0.667	130	130
1	73200	75031	RLOC_00000019	10	-	10.3	8.5	1	1	1137	1620
1	75389	76845	RLOC_00000021	9	+	8.7	-8.3	0.0672	0.645	129	195
1	88621	90698	RLOC_00000025	68	+	67.6	-67.6	1	1	180	326
1	95838	99251	RLOC_00000029	23	+	23.1	23.1	0.512	0.946	351	523
1	99865	101987	RLOC_00000030	15	+	14.9	12.9	0.466	0.913	215	318
1	108945	111699	RLOC_00000032	58	+	57.9	-48.4	1	1	115	200
1	114191	116417	RLOC_00000035	244	+	244.4	243.8	4.75e-07	3.18e-05	128	193
1	116783	118845	RLOC_00000036	14	+	14.2	14.0	1	1	205	395
1	120081	130716	RLOC_00000038	46	-	45.7	-7.3	0.494	0.933	521	786
1	136089	138163	RLOC_00000042	19	+	19.3	13.8	0.296	0.78	92	174
1	141869	143261	RLOC_00000044	8	+	7.5	-6.6	0.00241	0.0516	338	428
1	156476	158823	RLOC_00000051	8	-	7.7	7.5	1	1	525	873
1	159618	162953	RLOC_00000052	58	-	58.3	-52.8	0.383	0.852	82	113
1	171524	172948	RLOC_00000057	3	-	2.6	-0.1	0.133	0.664	763	1363
1	180016	182749	RLOC_00000060	11	-	11.1	8.6	1	1	1627	2319
1	185032	187135	RLOC_00000061	19	+	19.2	-17.9	0.0804	0.645	108	237
1	187161	193138	RLOC_00000062	100	+	99.6	-67.8	0.526	0.956	128	150
1	195644	198787	RLOC_00000064	7	+	6.8	5.6	0.839	1	406	562
1	199526	201781	RLOC_00000065	2	+	2.1	2.1	0.268	0.752	2367	3765
1	221641	224351	RLOC_00000071	2	-	2.0	-0.9	0.789	1	533	840
1	225615	227528	RLOC_00000072	3	-	3.1	-2.9	7.17e-05	0.00248	3979	3854
1	228798	231788	RLOC_00000073	34	+	34.2	34.2	0.00847	0.153	303	601
1	232821	237905	RLOC_00000075	53	-	52.7	52.7	1	1	229	377
1	258761	267883	RLOC_00000081	198	+	198.0	99.1	0.153	0.674	258	402
1	267992	270517	RLOC_00000084	4	+	4.0	-0.1	0.277	0.762	751	895
1	269757	274930	RLOC_00000085	39	-	39.5	14.2	0.419	0.88	466	624
1	270796	272189	RLOC_00000086	4	+	4.2	1.1	1	1	263	416
1	275187	276310	RLOC_00000087	2	+	2.0	2.0	0.172	0.683	100	147
1	278007	284324	RLOC_00000090	367	+	366.6	354.9	0.0303	0.459	68	88
1	284349	291222	RLOC_00000091	41	+	41.4	40.9	0.355	0.828	245	385
1	293245	295096	RLOC_00000093	2	+	2.3	-1.5	0.951	1	495	1049
1	295843	298262	RLOC_00000095	9	-	8.6	-7.4	0.0788	0.645	468	795
1	298403	302407	RLOC_00000096	16	-	15.8	-3.6	0.853	1	122	191
1	304104	306311	RLOC_00000099	22	-	21.7	5.3	0.63	1	69	146
1	313097	316090	RLOC_00000106	50	-	49.6	-48.0	1	1	200	316
1	330535	337912	RLOC_00000112	54	-	54.2	51.1	0.155	0.676	303	571
1	338241	340093	RLOC_00000113	2	+	2.5	-2.1	0.693	1	88	169
1	342818	344345	RLOC_00000115	36	-	36.1	26.2	1	1	220	264
1	345515	347603	RLOC_00000116	12	+	12.1	-10.7	0.981	1	93	149
1	347612	355158	RLOC_00000117	629	+	629.3	47.1	1	1	62	84
1	357905	363105	RLOC_00000119	37	-	36.7	-13.1	0.84	1	81	109
1	373334	386913	RLOC_00000124	270	+	270.5	25.9	0.821	1	51	79
1	386760	389808	RLOC_00000125	10	-	9.8	7.7	0.83	1	200	338
1	389820	400001	RLOC_00000126	339	+	338.9	336.2	0.0346	0.513	625	924
1	403099	404456	RLOC_00000130	4	-	4.3	2.3	1	1	963	1651
1	404594	414345	RLOC_00000131	46	+	46.2	-33.8	0.45	0.901	1415	2539
1	428630	430720	RLOC_00000137	38	-	37.6	35.7	1	1	46	173
1	440199	442972	RLOC_00000141	103	-	103.3	90.1	0.105	0.646	55	88
1	443099	446296	RLOC_00000142	42	-	42.1	36.4	0.0962	0.645	94	200
1	448420	452755	RLOC_00000143	92	-	92.4	91.5	1	1	416	643
1	453106	455582	RLOC_00000144	6	+	5.9	0.4	0.953	1	307	457
1	455668	458204	RLOC_00000145	10	+	9.7	-7.8	0.053	0.645	689	1033
1	461829	467946	RLOC_00000150	405	-	405.3	403.9	3.41e-05	0.00132	501	606
1	469386	471809	RLOC_00000151	59	+	58.5	12.9	0.48	0.922	89	140
1	470041	471625	RLOC_00000152	3	-	3.1	2.8	0.185	0.693	426	707
1	471970	473336	RLOC_00000153	7	-	6.6	-5.7	0.533	0.959	62	72
1	511757	515451	RLOC_00000165	490	-	489.8	485.0	1.03e-09	1.24e-07	893	959
1	518090	520495	RLOC_00000168	8	+	8.1	1.0	0.0636	0.645	668	967
1	537739	540127	RLOC_00000174	2	+	1.8	-1.2	0.397	0.864	2460	4031
1	553010	556152	RLOC_00000181	36	-	35.6	-21.6	0.142	0.667	160	131
1	571825	575085	RLOC_00000188	40	-	40.3	-4.4	0.145	0.671	213	248
1	580635	583195	RLOC_00000190	155	+	155.3	155.3	0.000445	0.012	74	119
1	591681	594264	RLOC_00000195	167	+	167.5	-164.2	1	1	50	90
1	594501	598657	RLOC_00000196	124	-	124.4	121.7	0.0659	0.645	71	122
1	602478	604401	RLOC_00000198	13	+	13.0	13.0	1	1	240	374
1	607798	609534	RLOC_00000201	5	-	4.5	4.3	1	1	3523	6418
1	621452	623054	RLOC_00000206	14	+	13.9	11.5	0.188	0.695	380	521
1	623655	624567	RLOC_00000207	2	-	2.3	2.1	0.752	1	260	306
1	626638	629996	RLOC_00000209	81	+	80.6	-68.3	0.00113	0.0267	255	435
1	630373	633420	RLOC_00000210	14	+	13.8	-13.7	0.0839	0.645	428	662
1	635133	637367	RLOC_00000211	30	+	29.7	28.2	0.103	0.645	175	248
1	645062	651988	RLOC_00000218	78	-	78.1	32.1	0.696	1	82	141
1	653603	654457	RLOC_00000219	7	-	6.6	5.3	1	1	371	544
1	655509	658205	RLOC_00000220	21	-	21.4	11.4	0.161	0.677	100	219
1	661087	662475	RLOC_00000222	3	-	3.0	1.8	0.229	0.726	637	1465
1	666806	669919	RLOC_00000226	14	-	13.9	-4.7	0.973	1	118	143
1	687785	692660	RLOC_00000231	25	-	25.1	-11.0	0.849	1	126	190
1	701360	703935	RLOC_00000234	13	+	13.2	-12.0	0.194	0.699	240	404
1	703829	706689	RLOC_00000235	9	-	9.2	-1.2	0.913	1	197	304
1	731553	738306	RLOC_00000240	17	-	17.3	7.5	0.967	1	203	360
1	739672	746782	RLOC_00000241	27	+	26.9	25.1	0.351	0.824	489	532
1	752981	756340	RLOC_00000248	6	-	5.6	4.2	1	1	11383	18281
1	754266	758692	RLOC_00000249	267	+	267.0	254.4	0.00535	0.102	163	179
1	761267	768235	RLOC_00000251	46	+	45.5	-28.2	0.584	0.988	237	391
1	775523	780084	RLOC_00000255	57	+	56.9	55.5	0.68	1	49	56
1	786831	788722	RLOC_00000258	4	+	4.0	-4.0	1	1	881	1324
1	789819	791689	RLOC_00000259	1	+	1.5	0.6	0.939	1	128	329
1	793284	798461	RLOC_00000261	45	-	45.0	44.9	0.461	0.91	282	552
1	802969	807112	RLOC_00000263	43	+	42.9	-39.7	0.671	1	90	161
1	807360	813216	RLOC_00000264	122	+	121.8	121.3	0.0617	0.645	104	146
1	813412	816812	RLOC_00000266	10	+	9.5	-3.6	0.961	1	113	241
1	817933	819563	RLOC_00000269	13	-	12.8	11.6	0.159	0.677	210	354
1	822581	824410	RLOC_00000271	2	-	1.6	-1.5	0.601	1	165	295
1	824537	826421	RLOC_00000272	10	+	9.9	-8.6	0.743	1	125	201
1	826522	830413	RLOC_00000273	69	+	68.6	-57.5	0.162	0.677	86	133
1	830549	835411	RLOC_00000274	62	+	61.8	-19.7	0.274	0.759	143	260
1	835770	844311	RLOC_00000275	112	+	112.3	-3.8	0.0867	0.645	170	247
1	842560	844226	RLOC_00000277	3	-	3.1	2.8	1	1	236	399
1	844440	847769	RLOC_00000278	222	-	221.6	220.3	1	1	144	233
1	845676	849655	RLOC_00000279	55	+	55.0	-29.1	0.127	0.66	240	364
1	852290	855027	RLOC_00000280	46	+	46.5	46.3	1	1	192	223
1	868852	871308	RLOC_00000284	7	-	6.9	5.9	1	1	622	1200
1	877725	880243	RLOC_00000290	17	-	17.1	-12.4	0.444	0.896	100	117
1	880339	883556	RLOC_00000291	101	-	100.7	-93.1	0.565	0.98	26	35
1	885532	890024	RLOC_00000293	543	-	542.6	542.3	0.000766	0.0192	187	334
1	894231	897718	RLOC_00000297	20	-	20.1	3.1	0.685	1	142	200
1	898479	899794	RLOC_00000298	3	+	2.8	-2.7	1	1	3594	6539
1	900684	903056	RLOC_00000300	19	+	19.0	12.2	0.608	1	132	154
1	907522	909650	RLOC_00000302	4	+	3.6	1.2	1	1	948	1891
1	910030	913749	RLOC_00000304	191	-	190.8	161.7	0.129	0.66	46	85
1	916771	918064	RLOC_00000307	2	-	1.7	1.5	1	1	2360	4051
1	933425	937152	RLOC_00000314	11	+	11.3	-9.4	0.691	1	205	398
1	937206	937287	RLOC_00000316	1	-	1.4	1.4	1	1	211	660
1	937400	937485	RLOC_00000317	1	-	1.1	0.4	0.464	0.912	92	237
1	959789	960916	RLOC_00000326	4	-	4.2	3.2	0.551	0.971	74	189
1	975840	977911	RLOC_00000329	35	-	34.7	34.4	0.276	0.762	195	315
1	979306	982002	RLOC_00000330	15	-	14.7	-2.8	0.342	0.817	265	488
1	982371	983591	RLOC_00000331	2	-	2.1	2.0	1	1	1577	2190
1	991105	993126	RLOC_00000334	4	+	4.3	-3.9	0.3	0.783	400	813
1	993399	995989	RLOC_00000335	11	+	11.1	9.7	0.429	0.887	16	43
1	996075	1000629	RLOC_00000336	72	+	71.8	-52.3	0.265	0.75	88	115
1	1004672	1008407	RLOC_00000338	73	+	73.4	-59.2	0.0602	0.645	117	186
1	1008493	1011358	RLOC_00000339	331	+	330.7	330.6	1	1	94	137
1	1013651	1017963	RLOC_00000342	65	+	65.3	27.8	0.471	0.917	50	86
1	1018057	1019247	RLOC_00000343	4	+	3.9	-3.9	0.0728	0.645	230	371
1	1024392	1029108	RLOC_00000347	262	-	262.5	228.1	1	1	116	218
1	1042229	1043931	RLOC_00000352	22	-	22.3	9.3	2.94e-07	2.1e-05	662	1355
1	1050504	1051194	RLOC_00000355	8	-	8.3	3.5	0.323	0.804	87	183
1	1051304	1056838	RLOC_00000356	34	+	34.4	34.1	0.484	0.926	230	420
1	1059479	1061247	RLOC_00000358	19	+	19.3	-6.4	0.916	1	33	76
1	1061251	1063821	RLOC_00000360	4	-	3.9	3.5	0.711	1	41	87
1	1064263	1071080	RLOC_00000361	38	-	38.0	23.7	0.548	0.969	284	483
1	1073179	1075952	RLOC_00000363	60	+	60.0	39.1	0.328	0.807	58	56
1	1075507	1080630	RLOC_00000364	69	-	69.2	-67.6	0.179	0.687	139	228
1	1096881	1100078	RLOC_00000367	28	+	27.8	25.2	0.662	1	108	196
1	1106353	1108725	RLOC_00000369	33	-	33.5	32.9	0.104	0.645	155	267
1	1109394	1114155	RLOC_00000370	270	+	270.2	-263.0	0.0882	0.645	71	146
1	1114363	1119800	RLOC_00000371	113	+	112.9	88.4	0.671	1	50	78
1	1119152	1122575	RLOC_00000372	49	-	48.5	-30.5	0.566	0.981	65	99
1	1128088	1129689	RLOC_00000375	4	-	4.2	2.2	0.437	0.893	452	636
1	1136122	1138713	RLOC_00000377	15	+	15.3	-13.1	0.373	0.843	223	448
1	1140277	1143130	RLOC_00000378	14	-	14.2	10.2	0.484	0.926	724	1192
1	1143431	1157788	RLOC_00000379	179	-	179.5	102.0	0.274	0.76	885	1238
1	1162893	1166198	RLOC_00000383	50	-	49.7	33.6	0.77	1	53	112
1	1164909	1167135	RLOC_00000384	10	+	10.1	10.0	1	1	840	1068
1	1185511	1188696	RLOC_00000390	5	-	5.3	-2.7	0.504	0.941	1039	1397
1	1188994	1191458	RLOC_00000391	2	-	1.9	-0.2	1	1	5128	10626
1	1191518	1193884	RLOC_00000392	5	+	4.7	-4.6	0.433	0.89	415	827
1	1202154	1208059	RLOC_00000395	45	+	45.2	1.4	0.656	1	128	177
1	1215912	1217548	RLOC_00000401	3	+	3.4	2.8	0.826	1	383	670
1	1226482	1230947	RLOC_00000407	18	+	17.8	17.6	0.368	0.838	387	569
1	1231505	1234504	RLOC_00000408	72	+	71.8	-39.5	0.151	0.671	47	72
1	1234175	1236206	RLOC_00000409	10	-	10.2	1.3	1	1	322	318
1	1240293	1242209	RLOC_00000412	7	+	6.8	-6.1	1	1	192	283
1	1242505	1244244	RLOC_00000413	24	+	23.6	-16.9	0.275	0.76	62	120
1	1252004	1261458	RLOC_00000416	706	-	706.3	660.5	1	1	93	156
1	1282162	1286619	RLOC_00000419	62	-	61.9	25.3	0.875	1	44	85
1	1287830	1291105	RLOC_00000420	6	-	6.3	6.1	0.41	0.875	308	569
1	1291311	1293396	RLOC_00000421	29	+	28.6	-26.2	0.519	0.951	184	416
1	1303466	1307973	RLOC_00000427	85	-	85.0	71.3	1	1	290	532
1	1313442	1315823	RLOC_00000428	5	+	4.7	-3.3	0.216	0.715	733	994
1	1321901	1324865	RLOC_00000430	47	+	47.3	45.5	0.152	0.673	84	175
1	1331465	1333651	RLOC_00000433	10	-	10.1	5.7	1	1	833	1430
1	1336269	1337903	RLOC_00000436	15	-	14.9	14.9	1	1	440	887
1	1345041	1355483	RLOC_00000439	258	+	258.4	249.4	0.288	0.774	297	388
1	1348451	1349478	RLOC_00000440	2	-	1.7	-1.1	0.519	0.95	881	910
1	1356083	1358547	RLOC_00000441	3	-	3.3	-1.7	1	1	3024	5450
1	1365044	1368940	RLOC_00000444	37	-	37.2	-34.7	0.277	0.762	167	321
1	1369035	1373107	RLOC_00000445	26	-	26.0	-21.8	0.528	0.957	134	195
1	1387798	1391381	RLOC_00000452	26	-	26.3	-24.5	0.163	0.677	216	399
1	1399173	1403195	RLOC_00000456	74	+	73.9	-47.8	0.0894	0.645	458	782
1	1403084	1407531	RLOC_00000457	236	-	236.4	-236.2	1	1	111	160
1	1407771	1410933	RLOC_00000458	18	-	18.4	-12.7	0.361	0.833	254	426
1	1411133	1413768	RLOC_00000459	4	+	3.9	2.6	0.775	1	558	929
1	1413624	1416218	RLOC_00000460	36	-	35.8	5.9	0.356	0.828	83	152
1	1416310	1421863	RLOC_00000461	507	-	506.7	-500.2	8.56e-05	0.00288	299	593
1	1425538	1428869	RLOC_00000462	27	+	26.7	-16.7	0.112	0.651	388	661
1	1431176	1433010	RLOC_00000465	8	-	8.5	-8.2	0.102	0.645	148	286
1	1448627	1450901	RLOC_00000473	73	-	73.3	-65.8	0.151	0.671	52	81
1	1450917	1455317	RLOC_00000474	56	-	56.5	-56.1	0.577	0.987	266	374
1	1457006	1458802	RLOC_00000475	5	-	4.9	-2.4	0.716	1	252	360
1	1471358	1476303	RLOC_00000482	43	-	42.9	-21.0	0.431	0.889	83	150
1	1477413	1478932	RLOC_00000483	2	-	2.1	-2.0	0.0762	0.645	1152	1641
1	1480110	1481006	RLOC_00000485	8	-	7.8	-3.7	0.189	0.696	144	270
1	1482517	1484119	RLOC_00000486	5	+	4.5	4.2	0.0529	0.645	247	444
1	1484066	1487027	RLOC_00000487	11	-	11.0	7.0	0.144	0.669	145	199
1	1487371	1494236	RLOC_00000488	89	-	89.2	-57.4	0.815	1	124	230
1	1498113	1501953	RLOC_00000490	17	-	17.2	6.4	0.544	0.967	219	376
1	1502242	1503943	RLOC_00000491	4	-	4.4	-4.4	1	1	1589	2992
1	1504939	1509261	RLOC_00000492	86	+	85.9	84.8	1	1	279	446
1	1509750	1511685	RLOC_00000495	19	+	19.2	6.0	0.908	1	49	79
1	1512792	1518900	RLOC_00000497	95	-	95.4	-90.9	0.562	0.978	110	139
1	1529766	1531484	RLOC_00000503	7	+	7.4	4.7	0.497	0.935	215	390
1	1544907	1547836	RLOC_00000512	22	-	21.8	-9.2	0.414	0.877	118	175
1	1558769	1559919	RLOC_00000516	5	-	5.2	1.9	0.876	1	208	247
1	1564490	1567516	RLOC_00000518	14	+	13.8	10.4	0.84	1	149	241
1	1576821	1582672	RLOC_00000520	66	+	65.9	62.0	0.0785	0.645	135	244
1	1582499	1583728	RLOC_00000521	14	-	13.6	2.4	0.223	0.719	220	287
1	1585343	1587806	RLOC_00000524	31	-	30.8	29.9	0.134	0.664	122	227
1	1594052	1595923	RLOC_00000526	23	-	23.3	-23.1	0.0467	0.645	235	458
1	1624930	1629303	RLOC_00000532	22	+	21.8	-16.6	0.4	0.868	292	576
1	1630848	1636018	RLOC_00000534	14	-	14.4	8.0	0.882	1	124	201
1	1645299	1647435	RLOC_00000539	4	-	3.6	0.0	0.956	1	476	407
1	1647574	1659611	RLOC_00000540	96	-	95.9	8.6	0.874	1	100	166
1	1661579	1664398	RLOC_00000542	25	-	25.0	23.1	0.601	1	77	132
1	1669349	1673923	RLOC_00000544	23	+	23.3	-11.4	0.987	1	121	223
1	1682178	1689935	RLOC_00000548	70	+	69.8	-25.5	0.961	1	70	98
1	1706735	1709360	RLOC_00000556	26	+	26.1	-15.0	0.687	1	68	93
1	1714817	1717290	RLOC_00000559	43	+	42.5	42.1	1	1	126	203
1	1717388	1718909	RLOC_00000560	4	-	4.0	-1.1	0.905	1	193	341
1	1730240	1732673	RLOC_00000570	56	+	56.5	56.5	1	1	86	99
1	1744760	1754043	RLOC_00000573	1639	+	1639.1	1639.1	3.45e-13	8.09e-11	604	766
1	1754129	1763903	RLOC_00000574	460	+	459.9	-453.0	1	1	178	250
1	1762316	1766317	RLOC_00000575	32	-	31.9	6.1	0.642	1	189	291
1	1766502	1768837	RLOC_00000577	3	-	2.8	-1.9	1	1	5289	7975
1	1768919	1773449	RLOC_00000578	31	+	30.7	-1.9	0.913	1	89	120
1	1771358	1773376	RLOC_00000579	47	-	47.3	-41.5	0.117	0.658	234	544
1	1779255	1784681	RLOC_00000581	26	+	26.4	24.1	0.35	0.824	503	697
1	1786845	1789736	RLOC_00000583	41	+	40.5	-39.3	0.4	0.867	109	181
1	1800534	1803987	RLOC_00000587	8	-	8.0	2.8	0.766	1	317	606
1	1807944	1815568	RLOC_00000589	134	-	134.0	-133.9	0.13	0.66	185	284
1	1815813	1817336	RLOC_00000590	34	-	34.4	18.8	1	1	135	129
1	1820270	1821994	RLOC_00000594	17	-	16.9	-16.9	0.444	0.897	80	174
1	1822599	1826269	RLOC_00000595	157	+	157.0	148.0	1	1	229	343
1	1827995	1829944	RLOC_00000597	1	-	1.4	-0.4	0.0695	0.645	5968	8079
1	1830470	1832555	RLOC_00000599	10	-	10.4	-3.6	0.833	1	60	67
1	1832940	1834942	RLOC_00000600	2	+	2.2	0.7	0.814	1	163	216
1	1834761	1838066	RLOC_00000601	16	-	16.3	-16.2	0.38	0.85	164	203
1	1843378	1846328	RLOC_00000603	6	+	6.1	3.0	0.814	1	458	316
1	1846700	1849693	RLOC_00000604	35	+	34.9	31.5	0.269	0.755	98	228
1	1851315	1855173	RLOC_00000605	186	-	185.7	185.7	1.31e-05	0.00058	329	447
1	1857730	1860938	RLOC_00000608	54	-	53.9	-37.6	0.058	0.645	262	443
1	1867000	1873851	RLOC_00000612	214	-	213.7	130.9	0.195	0.699	131	210
1	1882906	1883992	RLOC_00000614	22	+	21.7	-21.2	1	1	114	320
1	1889141	1891391	RLOC_00000617	15	+	15.4	15.4	0.584	0.988	131	263
1	1892230	1894194	RLOC_00000618	13	-	13.3	1.9	0.335	0.811	226	408
1	1894226	1896974	RLOC_00000619	22	-	21.7	15.6	1	1	507	907
1	1897119	1899280	RLOC_00000620	17	+	16.7	-16.4	0.26	0.745	251	432
1	1899943	1904896	RLOC_00000621	52	+	51.8	51.7	1	1	131	221
1	1906962	1911061	RLOC_00000623	41	+	40.8	-40.2	0.16	0.677	295	400
1	1911118	1915077	RLOC_00000624	85	+	84.9	84.7	0.511	0.946	87	123
1	1922207	1926303	RLOC_00000629	12	+	12.1	-12.1	0.561	0.977	259	471
1	1944872	1946287	RLOC_00000637	8	+	8.1	-7.7	0.579	0.988	99	167
1	1946780	1950889	RLOC_00000638	9	+	9.2	-1.9	0.969	1	307	459
1	1950595	1952880	RLOC_00000639	7	-	7.1	3.1	0.124	0.66	759	1142
1	1954673	1958866	RLOC_00000641	9	+	9.4	-2.6	0.396	0.863	501	715
1	1960030	1963189	RLOC_00000643	8	-	7.7	6.6	0.178	0.686	765	1046
1	1965594	1969558	RLOC_00000645	180	-	179.6	173.4	1	1	120	254
1	1969657	1974526	RLOC_00000648	41	+	40.8	39.0	0.13	0.66	120	225
1	1989430	1990754	RLOC_00000652	4	+	4.0	-0.1	0.813	1	207	307
1	1990615	1992837	RLOC_00000654	5	-	4.8	-3.2	0.458	0.909	294	450
1	1992228	1997541	RLOC_00000656	149	+	148.5	144.0	1	1	240	361
1	2001327	2003651	RLOC_00000658	16	+	15.5	13.9	0.0567	0.645	264	301
1	2001405	2007209	RLOC_00000659	35	-	34.6	30.5	0.295	0.779	213	367
1	2010882	2013594	RLOC_00000661	31	-	31.2	24.7	1	1	506	402
1	2027605	2034056	RLOC_00000665	21	+	21.2	-14.9	0.504	0.941	2732	3807
1	2034165	2037471	RLOC_00000666	47	+	47.0	-36.2	0.291	0.776	475	692
1	2040409	2049742	RLOC_00000669	4	+	4.2	3.6	1	1	34463	64493
1	2048863	2052180	RLOC_00000670	6	-	5.6	-2.4	0.943	1	315	452
1	2052222	2055548	RLOC_00000671	4	-	4.2	1.0	0.893	1	544	781
1	2055744	2067483	RLOC_00000672	318	-	318.0	-190.0	0.571	0.983	72	113
1	2067516	2070510	RLOC_00000675	84	+	83.8	-60.8	0.338	0.815	52	87
1	2076083	2077701	RLOC_00000677	4	-	3.5	-2.8	1	1	2664	5127
1	2083310	2087141	RLOC_00000680	22	+	22.2	2.6	0.965	1	139	215
1	2092902	2096784	RLOC_00000685	23	-	23.3	-8.9	0.651	1	159	253
1	2096986	2097665	RLOC_00000686	4	+	3.5	-1.4	0.761	1	69	130
1	2097615	2103497	RLOC_00000687	217	-	216.7	-216.0	1	1	158	261
1	2108511	2111063	RLOC_00000692	21	+	21.2	-21.1	0.46	0.909	143	218
1	2111322	2114686	RLOC_00000695	29	-	29.1	29.0	0.186	0.694	212	395
1	2130042	2135707	RLOC_00000702	8	-	8.2	-3.5	0.979	1	281	601
1	2135809	2140981	RLOC_00000703	332	+	332.0	330.6	0.00423	0.0823	138	165
1	2150157	2152541	RLOC_00000706	20	-	20.3	0.9	0.591	0.994	87	133
1	2152810	2155755	RLOC_00000707	7	+	7.3	-5.7	0.168	0.681	572	732
1	2155115	2156119	RLOC_00000708	4	-	3.7	0.7	0.537	0.961	89	152
1	2158399	2160805	RLOC_00000711	35	-	35.3	30.6	0.445	0.897	66	128
1	2160900	2163369	RLOC_00000712	17	-	16.7	8.1	0.0502	0.645	360	477
1	2168556	2172247	RLOC_00000716	87	+	87.1	-85.6	0.0664	0.645	783	1174
1	2173043	2175031	RLOC_00000717	10	-	10.1	10.0	0.082	0.645	305	469
1	2178021	2184193	RLOC_00000719	67	-	66.5	-63.9	0.0948	0.645	215	320
1	2189876	2190784	RLOC_00000723	2	-	2.4	-0.6	0.962	1	153	160
1	2191265	2193834	RLOC_00000724	19	-	19.2	-19.2	1.9e-08	1.73e-06	559	1348
1	2193940	2195996	RLOC_00000725	7	-	7.0	-7.0	0.208	0.71	24	39
1	2199996	2201296	RLOC_00000727	6	+	5.7	-3.4	0.934	1	151	300
1	2204103	2207099	RLOC_00000729	27	+	27.3	15.3	0.56	0.976	131	103
1	2208476	2212718	RLOC_00000731	43	-	43.2	42.6	0.351	0.824	113	184
1	2215203	2216989	RLOC_00000732	6	+	5.9	4.3	0.893	1	200	351
1	2220180	2223018	RLOC_00000735	40	-	40.1	40.1	1	1	186	369
1	2225738	2227705	RLOC_00000737	5	+	4.5	-2.3	0.345	0.82	230	331
1	2238016	2241471	RLOC_00000741	34	+	33.9	33.9	1	1	404	721
1	2245646	2248951	RLOC_00000744	50	-	49.9	-49.7	0.159	0.677	455	672
1	2249100	2254036	RLOC_00000745	77	+	76.9	67.5	1.61e-06	9.39e-05	2219	2867
1	2257277	2260113	RLOC_00000747	9	-	8.9	3.5	0.112	0.651	911	1328
1	2260316	2262923	RLOC_00000748	4	-	4.1	0.1	0.95	1	280	514
1	2263036	2264574	RLOC_00000749	13	+	13.0	12.5	0.0629	0.645	69	228
1	2264633	2269121	RLOC_00000750	64	-	64.3	60.5	0.332	0.809	140	232
1	2276042	2280502	RLOC_00000752	28	+	27.8	-26.6	0.331	0.808	370	618
1	2286186	2289403	RLOC_00000754	112	-	112.0	102.9	0.0654	0.645	179	396
1	2291368	2294619	RLOC_00000756	138	+	138.2	-138.2	0.0233	0.366	71	132
1	2296022	2299557	RLOC_00000761	29	-	28.6	28.6	0.318	0.8	89	148
1	2304434	2312399	RLOC_00000766	55	+	55.1	-52.3	0.219	0.717	157	304
1	2309533	2312385	RLOC_00000767	43	-	42.9	-42.5	0.319	0.801	81	116
1	2331131	2333767	RLOC_00000773	8	-	7.8	7.2	0.657	1	285	306
1	2336476	2339391	RLOC_00000776	5	-	4.9	-4.9	1	1	32055	47560
1	2341446	2342148	RLOC_00000778	6	+	5.9	-5.9	4.22e-13	9.15e-11	3981	5929
1	2352112	2356416	RLOC_00000783	173	-	172.7	160.8	0.00791	0.144	143	222
1	2359110	2366736	RLOC_00000784	203	-	202.6	200.2	0.00566	0.107	312	347
1	2368776	2369739	RLOC_00000786	2	+	2.3	-0.2	0.621	1	467	798
1	2370019	2374607	RLOC_00000787	10	-	10.2	3.8	0.719	1	295	543
1	2379594	2381390	RLOC_00000790	8	+	7.8	-1.2	0.055	0.645	607	966
1	2381588	2388169	RLOC_00000791	152	+	152.2	111.8	0.16	0.677	95	181
1	2390530	2392628	RLOC_00000794	48	-	47.8	-47.7	1	1	89	153
1	2394984	2398826	RLOC_00000797	25	+	24.6	-2.1	0.447	0.899	149	200
1	2397319	2402915	RLOC_00000798	426	-	426.3	426.3	0.134	0.664	64	67
1	2403991	2406049	RLOC_00000800	7	-	6.8	-2.3	0.745	1	158	348
1	2407410	2409697	RLOC_00000802	2	-	1.9	1.9	1	1	2678	4339
1	2407471	2408135	RLOC_00000803	1	+	1.3	-0.4	0.17	0.682	5312	6175
1	2412922	2413795	RLOC_00000805	2	+	2.1	-1.4	0.924	1	111	215
1	2416177	2420829	RLOC_00000808	30	+	30.2	30.1	0.447	0.898	199	352
1	2421088	2422066	RLOC_00000809	8	-	7.9	-7.3	0.000155	0.00477	521	1117
1	2422125	2423803	RLOC_00000810	9	+	9.1	-3.2	0.218	0.716	280	483
1	2424053	2429225	RLOC_00000811	29	+	29.0	22.3	0.625	1	126	183
1	2428772	2432091	RLOC_00000812	29	-	29.4	27.2	0.138	0.664	110	159
1	2437329	2439777	RLOC_00000814	0	+	0.4	0.2	0.864	1	7333	11839
1	2442569	2457401	RLOC_00000815	133	+	132.8	-76.7	0.616	1	634	1310
1	2445436	2454647	RLOC_00000817	158	+	157.6	49.3	0.846	1	57	103
1	2458183	2460817	RLOC_00000818	2	+	2.1	-1.0	0.248	0.741	2246	4418
1	2462948	2465545	RLOC_00000819	3	-	3.5	0.9	0.905	1	434	797
1	2465689	2467130	RLOC_00000820	4	-	3.9	3.4	0.355	0.828	168	316
1	2467144	2469316	RLOC_00000821	15	+	15.4	-6.7	0.216	0.715	283	437
1	2473164	2475128	RLOC_00000823	11	-	11.4	-11.1	0.478	0.922	106	179
1	2476952	2483810	RLOC_00000825	17	+	17.1	4.1	0.889	1	227	310
1	2483239	2485726	RLOC_00000826	42	-	42.1	42.1	0.421	0.881	49	82
1	2489385	2493327	RLOC_00000829	98	-	97.9	-32.8	0.607	1	44	57
1	2495304	2498764	RLOC_00000831	41	-	40.9	39.7	1	1	181	312
1	2535250	2537950	RLOC_00000840	6	+	6.4	-1.4	0.112	0.651	1302	1864
1	2539550	2542339	RLOC_00000844	35	-	34.6	-34.6	0.177	0.686	104	183
1	2561448	2562316	RLOC_00000850	9	-	9.3	-0.5	0.178	0.687	190	245
1	2564089	2565230	RLOC_00000852	11	-	10.8	0.0	0.645	1	121	200
1	2567419	2573448	RLOC_00000853	11	+	11.2	-2.9	0.873	1	320	484
1	2573626	2576782	RLOC_00000854	12	-	12.4	-10.4	1	1	1106	1876
1	2576975	2580754	RLOC_00000855	133	-	133.4	131.8	0.372	0.842	39	59
1	2581008	2583389	RLOC_00000856	35	-	35.2	22.7	0.705	1	70	93
1	2583593	2586969	RLOC_00000857	683	-	683.2	680.8	1.7e-05	0.000721	227	291
1	2607876	2609971	RLOC_00000862	31	+	31.2	-12.6	0.856	1	35	36
1	2614773	2621794	RLOC_00000864	57	+	56.6	-6.6	0.401	0.869	279	476
1	2632786	2635866	RLOC_00000869	20	-	19.5	-18.9	0.865	1	82	157
1	2635938	2638025	RLOC_00000870	9	+	9.4	-8.1	6.95e-05	0.00242	1690	2859
1	2640741	2641898	RLOC_00000872	1	-	0.7	0.6	1	1	45293	87412
1	2642012	2643295	RLOC_00000873	3	+	2.8	0.8	0.942	1	41	101
1	2643018	2646061	RLOC_00000874	46	-	46.2	-21.2	0.193	0.698	49	80
1	2646166	2657120	RLOC_00000875	337	+	337.4	-292.2	0.323	0.803	181	322
1	2672197	2674721	RLOC_00000879	23	+	22.7	-6.5	0.51	0.946	84	133
1	2675777	2679875	RLOC_00000880	69	+	68.9	61.5	0.295	0.779	96	138
1	2684173	2686150	RLOC_00000882	14	+	13.6	13.3	1	1	645	1170
1	2685658	2688658	RLOC_00000883	15	-	14.5	-7.4	0.547	0.969	292	418
1	2691053	2694685	RLOC_00000885	6	-	5.6	4.0	0.84	1	792	1065
1	2696380	2703217	RLOC_00000886	79	+	78.6	53.7	0.263	0.748	413	671
1	2703339	2709550	RLOC_00000887	118	+	117.8	-97.8	0.183	0.691	384	726
1	2709550	2711046	RLOC_00000888	7	-	6.7	-5.7	0.252	0.742	142	241
1	2712683	2714842	RLOC_00000889	3	+	3.0	-2.5	0.3	0.783	1072	1472
1	2714993	2716532	RLOC_00000890	41	-	40.7	26.0	1	1	67	126
1	2723676	2733651	RLOC_00000893	350	+	349.8	348.0	0.257	0.744	70	128
1	2736689	2743947	RLOC_00000896	328	+	327.6	-303.5	0.0511	0.645	86	163
1	2742918	2751278	RLOC_00000897	519	-	518.7	-506.6	1	1	688	1056
1	2752123	2753809	RLOC_00000899	7	+	7.1	-3.0	1	1	614	1237
1	2756887	2759889	RLOC_00000900	6	-	5.8	-3.1	0.897	1	259	499
1	2762583	2769002	RLOC_00000902	51	+	51.1	-6.0	0.698	1	151	185
1	2768964	2771465	RLOC_00000903	12	-	12.0	8.4	0.0771	0.645	265	415
1	2771619	2773531	RLOC_00000904	34	+	33.9	-30.0	0.076	0.645	99	147
1	2773940	2779319	RLOC_00000905	27	+	26.9	-19.0	0.464	0.912	202	314
1	2808520	2811227	RLOC_00000911	19	-	18.6	-18.6	0.429	0.887	176	303
1	2808759	2809775	RLOC_00000912	4	+	4.4	4.1	1	1	99	136
1	2812817	2818071	RLOC_00000914	121	-	120.8	-111.5	0.258	0.744	127	263
1	2819051	2820637	RLOC_00000915	8	-	8.0	-3.6	0.809	1	114	137
1	2821353	2825487	RLOC_00000916	16	-	16.2	10.3	0.597	0.998	289	466
1	2827058	2829378	RLOC_00000918	16	+	16.3	13.4	0.0632	0.645	179	327
1	2839051	2841134	RLOC_00000920	50	+	49.5	49.5	0.158	0.677	53	88
1	2846893	2848100	RLOC_00000923	3	-	3.2	-0.5	0.161	0.677	637	1368
1	2848148	2852270	RLOC_00000924	372	+	372.0	-371.4	0.00749	0.138	72	123
1	2852362	2855941	RLOC_00000925	10	+	10.2	-4.9	0.966	1	255	443
1	2867202	2870745	RLOC_00000930	6	+	6.5	-1.2	0.887	1	351	646
1	2873299	2877261	RLOC_00000931	25	+	24.7	-24.6	0.0604	0.645	424	713
1	2882434	2886635	RLOC_00000935	107	+	106.8	106.0	0.0693	0.645	702	1127
1	2895164	2899446	RLOC_00000939	34	-	33.9	29.8	0.534	0.96	215	312
1	2899775	2904862	RLOC_00000940	23	-	23.4	-20.2	0.394	0.861	254	372
1	2911278	2915456	RLOC_00000942	84	+	84.3	-61.9	0.602	1	22	48
1	2921063	2925900	RLOC_00000944	31	-	31.1	23.3	0.643	1	157	229
1	2927501	2929107	RLOC_00000945	4	+	4.3	-4.0	1	1	3315	4922
1	2936474	2939481	RLOC_00000948	25	-	24.8	-24.1	0.164	0.678	125	283
1	2939553	2945964	RLOC_00000950	123	-	123.4	115.9	1	1	1358	2050
1	2946029	2949159	RLOC_00000951	12	+	11.6	5.1	0.787	1	220	351
1	2951533	2955693	RLOC_00000953	156	-	156.1	142.3	0.000486	0.013	151	237
1	2964039	2972472	RLOC_00000956	261	-	260.8	-255.2	0.00333	0.0679	293	665
1	2972637	2977002	RLOC_00000959	13	-	13.2	7.9	8.04e-05	0.00272	955	2151
1	2977767	2982713	RLOC_00000961	68	-	67.9	6.8	1	1	253	347
1	2984828	2986231	RLOC_00000962	2	+	2.4	1.8	0.584	0.988	471	647
1	2989119	2990418	RLOC_00000967	13	+	13.5	2.0	0.212	0.712	117	231
1	2994216	2998232	RLOC_00000969	11	+	11.2	-0.1	0.0509	0.645	417	774
1	2997454	3001314	RLOC_00000970	29	-	28.9	-11.5	0.667	1	135	148
1	3003494	3008404	RLOC_00000972	29	+	28.7	-10.5	0.945	1	61	105
1	3008896	3009954	RLOC_00000974	1	+	0.6	0.3	0.0642	0.645	6736	14824
1	3009986	3015297	RLOC_00000975	156	-	156.4	-148.1	0.0696	0.645	235	445
1	3015236	3018712	RLOC_00000976	7	+	6.8	2.2	1	1	3173	4565
1	3031140	3040454	RLOC_00000981	1110	+	1109.6	1038.9	9.73e-05	0.00323	140	125
1	3037714	3041873	RLOC_00000985	60	-	60.1	57.4	0.0573	0.645	296	541
1	3041995	3045541	RLOC_00000986	15	+	14.7	-10.8	0.17	0.682	623	893
1	3045156	3048006	RLOC_00000987	47	-	46.5	25.9	0.567	0.981	45	81
1	3049035	3055389	RLOC_00000988	377	+	377.3	377.3	1	1	115	143
1	3063935	3065999	RLOC_00000993	3	+	2.9	-2.8	0.229	0.726	189	335
1	3070855	3072273	RLOC_00000996	5	-	4.8	4.3	0.602	1	184	256
1	3075767	3079654	RLOC_00000997	17	+	17.1	-12.6	0.383	0.852	285	284
1	3093643	3094954	RLOC_00001001	4	+	4.5	-1.4	1	1	680	985
1	3095159	3100828	RLOC_00001002	10	-	10.2	-8.2	0.468	0.915	913	1331
1	3104491	3107801	RLOC_00001004	21	+	21.0	14.5	0.69	1	295	696
1	3111896	3116692	RLOC_00001007	6	-	5.9	0.8	0.377	0.846	725	1074
1	3119738	3122585	RLOC_00001010	7	+	7.0	-6.9	1	1	1326	2239
1	3122925	3124741	RLOC_00001011	5	+	4.5	-3.8	0.929	1	207	343
1	3127744	3131082	RLOC_00001014	92	-	91.8	-90.4	0.0395	0.576	55	86
1	3136187	3140353	RLOC_00001018	96	-	96.0	55.4	0.267	0.752	131	256
1	3147636	3154404	RLOC_00001021	54	-	54.0	-48.9	0.491	0.931	188	268
1	3154414	3156376	RLOC_00001022	3	+	2.8	-0.7	0.488	0.928	427	622
1	3157260	3161698	RLOC_00001023	96	-	95.9	49.0	0.00193	0.0424	230	362
1	3157463	3159243	RLOC_00001024	2	+	2.4	2.3	0.149	0.671	1031	1492
1	3161831	3165616	RLOC_00001025	4	+	4.3	2.2	0.684	1	439	771
1	3165310	3167899	RLOC_00001026	5	-	5.5	2.5	0.33	0.807	506	1249
1	3172083	3176965	RLOC_00001028	207	+	207.2	206.3	1	1	286	607
1	3176825	3180734	RLOC_00001030	36	-	36.2	36.1	0.373	0.843	601	791
1	3189300	3190242	RLOC_00001033	0	+	0.4	-0.0	0.982	1	344	725
1	3192567	3195044	RLOC_00001035	3	-	3.0	2.8	0.238	0.732	81	143
1	3195718	3200403	RLOC_00001036	92	-	92.3	-90.8	0.113	0.651	164	266
1	3201684	3204150	RLOC_00001037	22	+	22.4	20.3	0.17	0.682	185	441
1	3205578	3209447	RLOC_00001041	94	+	94.4	90.1	0.00144	0.0326	125	240
1	3218578	3227109	RLOC_00001046	141	-	141.2	-128.6	0.25	0.742	304	431
1	3252097	3255782	RLOC_00001055	5	+	4.9	-4.7	0.0774	0.645	921	1594
1	3256188	3261741	RLOC_00001056	154	-	154.0	149.9	0.171	0.682	102	165
1	3262221	3264976	RLOC_00001057	78	-	78.2	-77.2	0.47	0.916	58	72
1	3269538	3272110	RLOC_00001059	11	-	10.9	-7.4	0.19	0.698	353	423
1	3273752	3275953	RLOC_00001060	31	+	30.8	-29.5	0.179	0.688	86	140
1	3284072	3287292	RLOC_00001063	20	+	20.3	-17.5	0.77	1	251	211
1	3288086	3290497	RLOC_00001064	20	+	20.5	19.7	0.121	0.66	391	288
1	3290161	3296200	RLOC_00001065	71	-	71.0	59.7	0.187	0.694	207	374
1	3296515	3300516	RLOC_00001066	125	-	125.3	123.9	0.17	0.682	68	88
1	3304018	3306956	RLOC_00001071	36	-	35.9	32.6	0.516	0.948	119	161
1	3310940	3322336	RLOC_00001073	165	+	165.1	-161.1	0.281	0.766	187	266
1	3322553	3323735	RLOC_00001074	4	-	3.9	-3.6	0.529	0.957	301	368
1	3325831	3327697	RLOC_00001075	43	+	43.1	-22.5	0.239	0.732	66	83
1	3333491	3341629	RLOC_00001078	132	-	132.1	-123.1	0.4	0.868	367	535
1	3346382	3348139	RLOC_00001080	4	-	4.0	-2.4	1	1	1158	2383
1	3355580	3356453	RLOC_00001084	5	+	5.1	4.5	0.691	1	113	207
1	3356626	3359853	RLOC_00001085	71	-	71.4	-67.4	0.623	1	53	54
1	3370401	3377469	RLOC_00001091	47	+	47.4	-35.4	0.814	1	149	314
1	3381377	3388378	RLOC_00001093	76	-	75.7	64.5	0.556	0.975	185	301
1	3390278	3392602	RLOC_00001095	28	-	27.8	-26.8	0.598	0.999	47	44
1	3392767	3395089	RLOC_00001096	101	-	101.5	101.5	1.19e-05	0.000536	114	241
1	3395495	3398577	RLOC_00001097	44	-	44.4	-42.3	0.216	0.715	681	1040
1	3400553	3402420	RLOC_00001098	8	+	8.4	8.2	0.4	0.868	58	85
1	3406951	3412897	RLOC_00001101	29	-	29.2	25.6	0.739	1	160	295
1	3414822	3419691	RLOC_00001103	19	-	19.4	4.3	0.773	1	225	411
1	3428431	3430640	RLOC_00001108	6	-	5.6	-4.6	0.377	0.846	334	537
1	3441987	3444375	RLOC_00001113	17	-	16.6	13.4	1	1	179	246
1	3459953	3461513	RLOC_00001116	6	-	5.9	-5.2	0.174	0.685	459	686
1	3461514	3465753	RLOC_00001117	174	+	173.7	-163.6	0.0697	0.645	84	159
1	3487572	3491488	RLOC_00001127	149	+	148.6	-136.8	0.0613	0.645	100	165
1	3491257	3495244	RLOC_00001128	35	-	35.3	-10.6	0.747	1	222	373
1	3501987	3503544	RLOC_00001131	4	-	4.4	1.3	0.711	1	476	874
1	3503610	3509027	RLOC_00001132	1846	+	1846.0	1846.0	9.75e-12	1.63e-09	319	218
1	3512738	3514824	RLOC_00001134	5	-	4.5	1.8	0.66	1	362	772
1	3515181	3518035	RLOC_00001136	26	-	26.5	6.8	0.779	1	94	88
1	3530352	3532017	RLOC_00001139	8	+	8.4	-3.3	0.987	1	98	153
1	3535326	3538371	RLOC_00001141	9	+	9.3	-1.2	0.343	0.818	340	690
1	3548847	3550767	RLOC_00001144	15	-	14.7	5.0	0.334	0.811	73	122
1	3554103	3556645	RLOC_00001145	5	+	4.8	-1.7	0.905	1	125	239
1	3562828	3564850	RLOC_00001150	39	+	39.4	39.4	1	1	133	202
1	3567904	3571062	RLOC_00001152	9	-	9.1	8.6	0.813	1	222	332
1	3580829	3590928	RLOC_00001157	34	-	34.2	-20.1	0.934	1	184	429
1	3599033	3605076	RLOC_00001162	397	-	397.2	219.4	8.52e-05	0.00288	144	207
1	3605511	3607595	RLOC_00001164	8	-	8.1	-6.0	0.506	0.942	192	360
1	3607630	3610616	RLOC_00001165	7	-	7.1	-3.8	0.421	0.881	502	716
1	3611544	3614826	RLOC_00001167	11	+	10.6	3.3	0.954	1	113	174
1	3614507	3616308	RLOC_00001168	9	-	8.8	-6.2	0.585	0.989	245	391
1	3627658	3630836	RLOC_00001173	98	+	98.3	-97.6	0.0932	0.645	243	325
1	3632131	3637250	RLOC_00001174	61	-	60.8	58.7	0.211	0.712	184	307
1	3639834	3644187	RLOC_00001175	39	+	39.5	37.6	0.18	0.689	244	394
1	3644179	3658612	RLOC_00001176	623	-	623.3	-574.3	0.0243	0.379	334	567
1	3659203	3665162	RLOC_00001177	62	+	62.5	-62.4	0.119	0.66	611	1011
1	3665086	3667161	RLOC_00001178	29	-	28.7	22.1	0.998	1	35	94
1	3681688	3684241	RLOC_00001185	20	+	20.2	5.0	0.561	0.977	100	182
1	3684567	3689892	RLOC_00001187	108	+	108.5	-15.6	0.568	0.981	56	100
1	3694327	3698013	RLOC_00001189	56	-	56.4	55.9	0.524	0.955	47	79
1	3702558	3704119	RLOC_00001191	17	+	16.8	-2.2	0.000686	0.0173	102	132
1	3744834	3748557	RLOC_00001201	30	+	30.4	-2.5	0.793	1	222	319
1	3750045	3752768	RLOC_00001203	78	-	77.8	7.0	0.618	1	35	54
1	3753297	3755916	RLOC_00001204	14	+	13.8	-8.0	0.749	1	121	264
1	3755593	3756988	RLOC_00001205	11	-	11.4	-7.7	0.255	0.744	71	130
1	3766753	3769799	RLOC_00001208	13	-	12.8	12.8	0.663	1	217	370
1	3777235	3780823	RLOC_00001212	6	+	6.2	-5.4	0.312	0.795	2056	1790
1	3787262	3790905	RLOC_00001215	27	-	27.2	-27.1	0.184	0.692	166	302
1	3800499	3804266	RLOC_00001219	4	-	4.2	-1.4	0.686	1	720	1195
1	3809794	3813809	RLOC_00001222	70	+	70.2	58.2	0.176	0.686	94	201
1	3813871	3823088	RLOC_00001223	122	-	122.4	24.4	0.438	0.894	494	667
1	3832586	3834508	RLOC_00001226	7	+	6.7	-1.8	0.988	1	175	235
1	3834406	3838304	RLOC_00001227	51	-	50.9	-46.3	0.434	0.891	104	149
1	3837693	3844474	RLOC_00001228	317	+	317.1	310.6	0.0544	0.645	305	482
1	3847214	3850811	RLOC_00001231	16	+	15.6	8.8	0.375	0.845	885	1598
1	3853183	3855507	RLOC_00001232	40	+	39.5	-30.8	0.533	0.959	49	121
1	3862407	3864152	RLOC_00001235	4	+	3.7	-2.4	0.783	1	466	819
1	3864042	3867000	RLOC_00001236	15	-	14.6	0.3	1	1	270	473
1	3874394	3875530	RLOC_00001242	3	+	3.3	1.6	0.331	0.808	314	527
1	3895101	3897028	RLOC_00001253	5	-	5.4	-4.2	0.593	0.995	109	146
1	3901949	3903895	RLOC_00001257	12	+	12.3	-6.4	0.973	1	77	108
1	3914631	3918243	RLOC_00001263	28	+	28.4	-25.4	0.132	0.664	306	555
1	3928114	3931701	RLOC_00001266	18	-	17.7	-13.0	0.879	1	151	275
1	3938421	3940871	RLOC_00001268	2	+	1.7	-1.3	0.977	1	427	672
1	3945583	3946757	RLOC_00001272	4	+	4.0	2.1	0.259	0.745	261	467
1	3948713	3957063	RLOC_00001273	331	+	331.2	-292.7	0.075	0.645	259	326
1	3963053	3966850	RLOC_00001278	51	-	50.8	50.1	0.146	0.671	62	134
1	3967475	3969877	RLOC_00001279	12	+	11.6	-8.7	1	1	565	1083
1	3971968	3973279	RLOC_00001282	5	-	5.2	-1.4	0.606	1	78	130
1	3981152	3985224	RLOC_00001287	35	+	35.4	-29.1	0.634	1	113	178
1	3995157	3997965	RLOC_00001294	4	+	3.5	2.0	1	1	2174	4549
1	3999198	4000118	RLOC_00001295	6	+	6.1	3.6	0.357	0.829	360	550
1	4001112	4006792	RLOC_00001296	23	+	23.0	-23.0	0.135	0.664	2174	3770
1	4007128	4010461	RLOC_00001298	8	-	8.4	-6.1	0.889	1	72	104
1	4010726	4013151	RLOC_00001299	13	+	13.0	8.3	0.613	1	225	420
1	4014781	4016544	RLOC_00001303	13	+	12.8	2.3	0.887	1	109	154
1	4016711	4021043	RLOC_00001304	4	-	4.4	1.1	1	1	5672	9206
1	4028594	4030656	RLOC_00001308	13	+	13.4	-13.3	0.096	0.645	605	835
1	4049826	4053862	RLOC_00001315	14	-	13.8	12.6	0.506	0.942	280	585
1	4056164	4057968	RLOC_00001316	12	+	11.5	9.9	0.639	1	165	187
1	4061362	4063549	RLOC_00001318	79	-	79.5	79.5	0.107	0.648	109	152
1	4064484	4066344	RLOC_00001319	22	-	22.2	-21.2	0.165	0.679	143	175
1	4072754	4077330	RLOC_00001322	32	+	32.5	1.9	0.0571	0.645	388	660
1	4084161	4085185	RLOC_00001325	3	+	3.1	2.7	0.438	0.894	344	402
1	4089578	4090874	RLOC_00001326	14	-	14.2	-2.6	1	1	594	1627
1	4105215	4109601	RLOC_00001328	74	+	73.7	66.9	1	1	172	450
1	4114673	4117614	RLOC_00001329	22	-	21.6	20.1	0.164	0.678	316	564
1	4121368	4125120	RLOC_00001331	19	+	18.6	-18.4	0.21	0.712	190	314
1	4137510	4140158	RLOC_00001338	9	+	8.5	1.9	0.22	0.718	488	1017
1	4144256	4151069	RLOC_00001341	103	+	102.9	97.5	1	1	689	1225
1	4153556	4161529	RLOC_00001342	104	+	103.5	-99.7	0.167	0.681	1012	1708
1	4171993	4174830	RLOC_00001345	12	+	11.9	11.2	0.176	0.686	159	230
1	4186623	4190342	RLOC_00001348	22	+	22.1	-22.1	0.204	0.707	159	237
1	4186652	4188233	RLOC_00001349	6	-	6.1	-6.0	0.177	0.686	498	627
1	4194419	4196847	RLOC_00001352	10	+	9.5	-9.5	0.265	0.75	60	82
1	4198365	4206486	RLOC_00001354	280	+	280.1	-280.1	0.161	0.677	305	505
1	4214257	4217412	RLOC_00001356	9	-	8.6	-4.5	0.246	0.738	33	47
1	4220118	4222897	RLOC_00001357	43	+	43.3	40.8	0.305	0.788	205	321
1	4223029	4225254	RLOC_00001358	8	+	7.7	-5.6	0.808	1	265	444
1	4241420	4243229	RLOC_00001362	1	-	1.0	-0.7	0.705	1	1102	1349
1	4247203	4250752	RLOC_00001364	73	+	73.2	72.4	0.418	0.88	70	108
1	4250944	4257457	RLOC_00001365	16	+	16.0	0.9	0.994	1	146	294
1	4266617	4270907	RLOC_00001371	126	-	125.9	-113.9	0.0534	0.645	351	525
1	4282793	4285876	RLOC_00001376	46	+	45.6	45.6	0.0586	0.645	226	295
1	4303254	4306101	RLOC_00001384	10	-	9.6	-2.8	0.869	1	167	284
1	4305790	4308023	RLOC_00001385	11	+	10.8	6.3	0.443	0.896	195	294
1	4319864	4323265	RLOC_00001393	29	-	28.9	-27.0	0.705	1	122	182
1	4326730	4328616	RLOC_00001395	11	-	10.7	-10.2	0.73	1	77	155
1	4342208	4344875	RLOC_00001400	122	+	122.3	76.0	0.0834	0.645	39	65
1	4344940	4348390	RLOC_00001401	14	-	14.2	-13.9	0.925	1	104	216
1	4348497	4355993	RLOC_00001402	83	+	82.7	80.5	0.334	0.811	601	852
1	4353638	4361270	RLOC_00001403	9	-	8.6	7.9	0.403	0.869	1761	1662
1	4361508	4365398	RLOC_00001404	9	-	9.4	-5.2	0.931	1	259	475
1	4366576	4367136	RLOC_00001405	7	+	6.7	3.1	0.0697	0.645	112	188
1	4367255	4368844	RLOC_00001406	6	+	6.2	-4.7	0.0896	0.645	508	609
1	4368705	4371474	RLOC_00001408	16	-	15.8	13.0	0.196	0.7	84	125
1	4374154	4375203	RLOC_00001410	2	-	1.9	-1.1	0.904	1	128	208
1	4374204	4378514	RLOC_00001411	64	+	63.8	-63.8	0.259	0.745	53	185
1	4378831	4379607	RLOC_00001412	8	-	8.1	7.8	0.116	0.657	177	416
1	4379693	4381764	RLOC_00001413	6	-	5.6	2.8	0.869	1	189	310
1	4384327	4387133	RLOC_00001415	15	+	14.9	-0.8	0.49	0.93	185	273
1	4389677	4391344	RLOC_00001417	12	+	11.6	10.2	0.102	0.645	100	162
1	4392410	4394455	RLOC_00001419	1	-	1.1	-0.4	0.137	0.664	3695	7063
1	4394730	4398198	RLOC_00001420	52	-	52.4	-51.5	0.0115	0.2	562	824
1	4398297	4405669	RLOC_00001421	293	-	293.5	-281.2	0.154	0.674	82	127
1	4419713	4422684	RLOC_00001424	65	+	64.5	-58.6	0.297	0.781	46	54
1	4433629	4436131	RLOC_00001428	25	+	24.7	19.5	0.41	0.874	152	173
1	4436088	4439639	RLOC_00001429	59	-	58.6	56.6	0.256	0.744	117	204
1	4440403	4443954	RLOC_00001431	25	-	24.7	-23.9	0.45	0.901	140	227
1	4444020	4447401	RLOC_00001432	166	-	166.4	166.4	1	1	36	74
1	4452189	4454900	RLOC_00001434	3	+	3.2	-0.5	0.656	1	498	1000
1	4459001	4460996	RLOC_00001437	12	+	11.9	-11.6	0.0901	0.645	432	574
1	4461737	4463589	RLOC_00001438	4	+	3.9	-3.8	0.236	0.73	356	626
1	4463858	4465725	RLOC_00001439	5	+	4.8	-4.3	0.612	1	88	130
1	4467078	4469069	RLOC_00001441	4	+	4.1	-2.2	0.869	1	130	263
1	4480792	4483835	RLOC_00001446	142	+	142.4	-141.7	1	1	142	216
1	4498788	4501694	RLOC_00001451	192	+	191.6	-191.4	1	1	400	593
1	4499665	4503574	RLOC_00001452	25	-	24.8	7.9	0.354	0.827	111	176
1	4515463	4520335	RLOC_00001455	339	+	339.4	-317.5	0.195	0.7	41	55
1	4525224	4526197	RLOC_00001458	3	-	3.0	-2.6	1	1	2674	2962
1	4528333	4530110	RLOC_00001461	5	-	4.7	0.5	0.689	1	139	175
1	4542167	4543970	RLOC_00001463	12	+	11.7	-11.6	0.000293	0.00835	655	602
1	4544955	4549164	RLOC_00001464	50	+	49.6	37.0	0.114	0.653	638	1473
1	4556871	4558859	RLOC_00001466	27	+	26.9	-26.3	0.427	0.886	104	156
1	4563427	4567849	RLOC_00001468	8	-	8.1	-5.2	0.898	1	399	602
1	4569447	4571229	RLOC_00001470	2	-	2.3	-1.4	0.703	1	109	214
1	4572279	4576711	RLOC_00001471	101	-	101.2	-99.2	0.0911	0.645	146	146
1	4576872	4578369	RLOC_00001472	4	-	4.1	-4.1	0.151	0.671	989	1969
1	4588993	4590501	RLOC_00001475	45	-	45.1	37.3	0.355	0.828	28	60
1	4592303	4594468	RLOC_00001476	6	-	6.0	-6.0	0.384	0.853	483	874
1	4608076	4610878	RLOC_00001481	3	-	2.9	-0.4	1	1	8803	16362
1	4612088	4612993	RLOC_00001483	10	+	9.8	5.0	0.873	1	82	200
1	4612649	4615219	RLOC_00001484	28	-	27.5	-15.7	0.0296	0.45	305	486
1	4615767	4618548	RLOC_00001485	75	+	75.1	-69.6	0.258	0.744	69	139
1	4636983	4644422	RLOC_00001497	262	-	261.7	247.5	0.0623	0.645	346	437
1	4644520	4647142	RLOC_00001498	61	-	60.8	60.6	0.339	0.815	68	122
1	4676947	4679808	RLOC_00001510	33	-	32.7	-32.1	0.0909	0.645	191	306
1	4680289	4682382	RLOC_00001511	16	-	16.4	-5.0	0.923	1	87	82
1	4688017	4689265	RLOC_00001513	6	+	6.4	5.7	0.746	1	134	159
1	4693298	4695309	RLOC_00001515	7	+	7.2	-0.6	0.258	0.744	284	405
1	4693763	4696487	RLOC_00001516	7	-	7.4	-3.3	0.648	1	304	374
1	4709756	4712672	RLOC_00001520	96	+	96.0	-92.8	0.149	0.671	80	181
1	4714569	4718265	RLOC_00001522	25	-	25.1	-2.6	0.356	0.828	117	255
1	4733990	4735453	RLOC_00001530	16	+	16.3	-14.9	0.405	0.869	90	134
1	4735557	4738008	RLOC_00001531	21	+	20.5	20.5	1	1	321	592
1	4739692	4741189	RLOC_00001533	16	-	16.3	-0.0	0.425	0.884	91	158
1	4748872	4751262	RLOC_00001538	20	+	20.3	-20.2	0.139	0.664	171	278
1	4753092	4755659	RLOC_00001540	25	-	24.6	11.4	1	1	183	355
1	4760952	4762666	RLOC_00001544	3	+	3.0	-2.3	3.74e-13	8.42e-11	12369	25028
1	4773433	4774980	RLOC_00001547	7	+	6.8	-2.7	0.215	0.715	157	326
1	4776282	4779420	RLOC_00001548	68	+	67.8	-67.8	0.167	0.681	128	140
1	4779350	4782546	RLOC_00001549	159	-	159.2	-159.1	0.093	0.645	41	47
1	4788478	4796633	RLOC_00001550	43	+	43.1	17.3	0.883	1	282	409
1	4797244	4800306	RLOC_00001551	10	+	9.8	-9.1	0.23	0.727	442	696
1	4800145	4801859	RLOC_00001552	9	-	8.7	0.0	0.312	0.796	191	405
1	4802678	4805373	RLOC_00001554	27	+	26.9	26.0	0.134	0.664	72	148
1	4805251	4807510	RLOC_00001555	12	-	11.7	-5.5	0.191	0.698	189	315
1	4816338	4818025	RLOC_00001559	7	-	6.7	1.2	0.814	1	155	276
1	4822450	4824432	RLOC_00001562	12	+	12.3	9.5	0.138	0.664	36	94
1	4833395	4835118	RLOC_00001567	4	-	4.2	-3.0	0.677	1	382	605
1	4835682	4837771	RLOC_00001568	9	-	8.7	6.2	0.647	1	225	389
1	4837873	4840327	RLOC_00001569	2	-	2.2	-1.0	0.468	0.915	119	245
1	4839215	4840795	RLOC_00001570	4	+	4.3	-1.6	0.0914	0.645	238	418
1	4840561	4841848	RLOC_00001571	45	-	44.6	-36.8	0.0778	0.645	84	110
1	4852532	4857522	RLOC_00001577	269	+	269.0	268.3	0.115	0.654	115	129
1	4854223	4855287	RLOC_00001578	9	-	9.1	0.6	0.335	0.812	149	214
1	4856474	4858017	RLOC_00001579	5	-	4.8	0.8	0.145	0.671	563	864
1	4861167	4864155	RLOC_00001581	26	+	25.7	-20.0	0.134	0.664	162	326
1	4864880	4868011	RLOC_00001582	48	+	47.6	-45.2	0.317	0.8	90	123
1	4868375	4871651	RLOC_00001583	18	+	17.6	6.7	0.967	1	56	580
1	4874862	4877256	RLOC_00001585	28	-	27.9	-14.2	0.256	0.744	174	278
1	4877451	4879483	RLOC_00001586	4	+	3.5	1.4	0.152	0.673	662	805
1	4880029	4882265	RLOC_00001587	12	-	12.0	2.2	0.59	0.993	226	356
1	4888146	4891663	RLOC_00001591	2	+	1.9	-1.2	1	1	3179	6508
1	4897306	4900131	RLOC_00001593	28	+	27.9	-19.3	0.0505	0.645	967	1655
1	4911092	4913167	RLOC_00001597	21	-	21.2	14.5	0.625	1	61	156
1	4915490	4918138	RLOC_00001598	20	+	19.8	-1.3	0.869	1	77	141
1	4917330	4921638	RLOC_00001600	27	-	27.1	-26.3	0.212	0.712	270	414
1	4926485	4928812	RLOC_00001603	4	-	3.6	-0.4	0.304	0.788	926	1304
1	4928930	4931111	RLOC_00001604	28	-	28.4	27.6	0.188	0.695	128	263
1	4946217	4947670	RLOC_00001608	4	-	4.1	3.8	0.109	0.65	643	1175
1	4948637	4953284	RLOC_00001611	152	-	151.7	141.1	1	1	53	89
1	4961593	4964515	RLOC_00001616	5	-	5.3	-2.5	0.644	1	453	684
1	4980623	4983367	RLOC_00001622	32	+	31.8	31.8	0.198	0.703	106	174
1	4983530	4987420	RLOC_00001623	6	+	6.3	-0.7	0.977	1	238	353
1	4989539	4992805	RLOC_00001624	28	+	28.0	-26.9	0.557	0.975	102	140
1	4998668	5000679	RLOC_00001628	29	-	28.8	27.7	0.0943	0.645	36	83
1	5000878	5003598	RLOC_00001629	61	-	60.5	57.0	0.212	0.712	82	108
1	5008139	5014529	RLOC_00001630	24	-	24.4	-13.3	0.882	1	213	344
1	5014674	5016708	RLOC_00001631	6	-	6.0	6.0	0.00171	0.038	278	465
1	5019946	5021768	RLOC_00001632	32	+	32.0	25.8	0.251	0.742	64	135
1	5023449	5031908	RLOC_00001633	152	+	152.1	-23.8	0.21	0.712	240	342
1	5037575	5040597	RLOC_00001636	6	+	5.7	-5.2	0.761	1	428	782
1	5042323	5045618	RLOC_00001638	11	+	10.5	-4.3	0.856	1	318	441
1	5051587	5055278	RLOC_00001644	73	-	73.0	-68.6	0.0635	0.645	107	160
1	5058582	5061309	RLOC_00001645	16	+	15.9	13.4	0.0738	0.645	107	204
1	5061693	5065303	RLOC_00001646	149	-	149.2	-121.5	0.055	0.645	88	141
1	5075178	5077981	RLOC_00001649	60	-	60.3	20.4	0.127	0.66	58	131
1	5093960	5098270	RLOC_00001655	50	-	50.1	-49.1	0.627	1	143	239
1	5102369	5104891	RLOC_00001657	4	-	4.2	-0.4	0.672	1	322	634
1	5104974	5107107	RLOC_00001659	9	-	9.0	6.0	0.54	0.963	140	291
1	5107396	5115640	RLOC_00001660	41	-	40.9	39.8	0.777	1	303	522
1	5116522	5123559	RLOC_00001661	93	-	93.0	52.7	0.38	0.85	116	207
1	5124669	5126329	RLOC_00001662	35	+	35.5	17.1	1	1	70	90
1	5128343	5129731	RLOC_00001663	4	-	4.1	-2.3	0.115	0.655	753	1141
1	5136873	5137982	RLOC_00001666	11	+	10.8	-10.6	0.0337	0.5	107	147
1	5138081	5139582	RLOC_00001667	10	-	10.3	-10.3	1.25e-05	0.000553	384	510
1	5139711	5143735	RLOC_00001668	10	-	10.3	-2.0	0.988	1	169	286
1	5148936	5151427	RLOC_00001671	5	+	4.6	2.6	0.614	1	474	697
1	5159063	5160071	RLOC_00001675	6	-	6.4	-0.5	0.193	0.698	224	152
1	5165488	5168336	RLOC_00001677	18	-	17.6	-8.8	0.212	0.712	1331	2451
1	5168463	5170066	RLOC_00001678	4	+	4.4	4.1	0.146	0.671	126	180
1	5171119	5176429	RLOC_00001680	232	-	231.5	231.5	0.000248	0.00723	168	297
1	5171180	5171956	RLOC_00001681	11	+	11.4	6.7	0.136	0.664	27	55
1	5177509	5183687	RLOC_00001683	108	+	108.3	105.4	0.00052	0.0138	440	612
1	5179378	5181434	RLOC_00001685	14	-	13.6	-13.6	0.193	0.698	154	222
1	5181990	5186996	RLOC_00001686	74	-	74.1	-73.1	1	1	187	264
1	5193283	5194214	RLOC_00001690	2	-	1.8	-1.8	0.404	0.869	377	732
1	5202592	5205964	RLOC_00001692	4	+	4.5	0.6	0.0608	0.645	1658	3273
1	5205942	5209931	RLOC_00001693	17	-	17.1	-16.6	0.0953	0.645	402	585
1	5210158	5212455	RLOC_00001694	5	-	4.7	2.6	0.473	0.918	521	983
1	5220434	5224221	RLOC_00001699	60	-	59.6	23.7	0.602	1	87	73
1	5224293	5226778	RLOC_00001700	3	+	3.2	-2.9	0.298	0.781	261	432
1	5228191	5231184	RLOC_00001703	9	-	8.6	-7.0	0.629	1	310	460
1	5231344	5236886	RLOC_00001704	84	-	83.6	81.2	0.101	0.645	103	160
1	5238045	5241710	RLOC_00001705	80	+	80.3	42.8	0.229	0.726	54	102
1	5239986	5241538	RLOC_00001706	27	-	27.3	16.6	0.247	0.74	71	83
1	5242072	5243262	RLOC_00001707	10	-	10.2	10.2	0.104	0.645	433	830
1	5243382	5248737	RLOC_00001708	349	+	348.7	-311.2	0.00177	0.0392	160	241
1	5248663	5252121	RLOC_00001709	23	-	22.9	-22.1	0.141	0.667	3036	5517
1	5249759	5250573	RLOC_00001710	6	+	6.3	5.7	0.193	0.698	135	154
1	5252284	5256863	RLOC_00001711	15	+	15.4	-10.0	0.847	1	262	381
1	5256673	5265100	RLOC_00001712	27	-	26.7	17.2	0.535	0.96	468	681
1	5275615	5277869	RLOC_00001717	7	-	7.0	0.1	1	1	570	661
1	5278021	5279988	RLOC_00001718	3	-	3.5	-3.0	0.761	1	495	701
1	5286882	5288667	RLOC_00001720	8	+	8.2	7.4	1	1	343	549
1	5290581	5292582	RLOC_00001721	24	+	23.7	-23.6	1	1	265	186
1	5294365	5297075	RLOC_00001723	138	-	137.7	137.7	3.05e-08	2.59e-06	404	637
1	5294449	5296068	RLOC_00001724	6	+	6.4	-3.1	0.779	1	103	135
1	5297846	5298571	RLOC_00001725	15	-	14.9	-14.2	0.257	0.744	57	110
1	5297911	5300939	RLOC_00001726	20	+	19.9	-6.9	0.897	1	141	219
1	5300732	5303522	RLOC_00001727	89	-	88.6	-80.8	1	1	119	173
1	5304097	5306087	RLOC_00001728	14	+	13.8	-4.7	0.46	0.909	126	165
1	5317972	5320648	RLOC_00001733	98	+	98.5	98.4	0.0588	0.645	67	79
1	5320613	5323895	RLOC_00001734	46	-	45.9	-41.8	0.47	0.916	77	102
1	5325317	5328891	RLOC_00001735	12	+	12.2	-11.7	0.0822	0.645	897	1521
1	5389951	5391672	RLOC_00001756	2	+	2.2	-1.2	0.933	1	522	544
1	5398917	5403853	RLOC_00001759	5	+	4.6	-1.1	0.425	0.884	1414	2468
1	5402529	5405527	RLOC_00001760	47	-	47.3	-43.2	0.122	0.66	62	83
1	5406133	5410035	RLOC_00001763	36	-	36.3	32.4	0.0511	0.645	156	272
1	5410783	5414985	RLOC_00001765	34	+	34.3	-16.6	0.474	0.918	146	211
1	5414359	5421045	RLOC_00001766	35	-	35.4	-29.3	0.566	0.981	198	264
1	5444219	5446564	RLOC_00001775	10	+	10.3	-2.2	0.603	1	157	268
1	5446442	5447878	RLOC_00001777	1	-	1.2	1.1	1	1	42728	79829
1	5448059	5450621	RLOC_00001779	16	+	16.0	-15.9	1	1	145	171
1	5454765	5457022	RLOC_00001784	13	+	13.5	-5.6	0.377	0.846	353	612
1	5458395	5461124	RLOC_00001786	9	-	9.0	-0.7	0.471	0.917	315	512
1	5460489	5464252	RLOC_00001787	129	+	129.1	118.5	0.0708	0.645	148	173
1	5465338	5471149	RLOC_00001789	95	+	94.6	-50.3	0.834	1	61	105
1	5471315	5473293	RLOC_00001790	1	+	1.5	-0.8	0.666	1	1619	2715
1	5473358	5478405	RLOC_00001791	75	+	75.1	72.8	0.0608	0.645	108	181
1	5478702	5482648	RLOC_00001792	12	+	11.6	6.9	0.202	0.707	1216	1857
1	5486272	5489132	RLOC_00001794	35	-	35.0	12.6	0.397	0.864	100	143
1	5489214	5492148	RLOC_00001795	8	+	8.1	-3.5	1.4e-06	8.43e-05	1818	2421
1	5494526	5495435	RLOC_00001798	4	+	3.7	3.0	0.879	1	135	332
1	5495008	5497833	RLOC_00001799	4	-	4.5	-3.5	0.832	1	187	295
1	5498000	5501370	RLOC_00001800	45	+	45.2	-29.4	0.161	0.677	75	120
1	5504607	5507059	RLOC_00001804	25	+	24.9	20.7	0.791	1	77	135
1	5508310	5511738	RLOC_00001805	82	+	82.4	56.7	0.31	0.794	68	133
1	5514281	5516162	RLOC_00001807	13	+	13.0	-12.3	7e-08	5.5e-06	690	627
1	5518244	5521297	RLOC_00001810	276	+	275.7	218.6	7.79e-05	0.00266	91	135
1	5538665	5540002	RLOC_00001816	16	-	15.9	-12.2	0.145	0.671	208	287
1	5540049	5542902	RLOC_00001817	3	+	2.8	-1.8	0.691	1	954	1698
1	5543145	5546190	RLOC_00001818	107	+	107.3	-106.8	0.0507	0.645	82	142
1	5546098	5547753	RLOC_00001819	6	-	6.0	6.0	1	1	391	751
1	5554842	5556844	RLOC_00001824	2	-	2.3	1.6	0.652	1	839	1381
1	5556580	5562273	RLOC_00001825	128	+	128.5	127.0	0.21	0.712	89	111
1	5558785	5562140	RLOC_00001826	83	-	82.7	82.7	0.0843	0.645	86	89
1	5567741	5570679	RLOC_00001828	61	-	60.6	38.7	0.307	0.791	56	103
1	5578264	5582210	RLOC_00001831	73	+	73.4	-73.2	1	1	751	946
1	5590755	5593098	RLOC_00001834	15	+	14.8	8.6	0.0623	0.645	276	480
1	5602761	5604823	RLOC_00001838	20	+	20.5	14.0	0.935	1	71	65
1	5605035	5607493	RLOC_00001839	41	+	40.5	-40.4	0.24	0.732	93	238
1	5608681	5612064	RLOC_00001840	18	+	18.3	11.6	0.771	1	61	185
1	5619543	5622674	RLOC_00001846	34	-	33.9	-33.6	0.097	0.645	453	742
1	5622745	5625683	RLOC_00001847	7	+	6.6	-4.5	0.934	1	189	381
1	5638778	5640202	RLOC_00001851	19	+	18.6	15.3	0.258	0.744	66	118
1	5648737	5651333	RLOC_00001856	17	+	17.0	-1.9	0.161	0.677	136	221
1	5659369	5668263	RLOC_00001858	311	+	310.7	-301.3	0.238	0.732	97	123
1	5668386	5670730	RLOC_00001859	30	+	29.9	29.8	0.137	0.664	142	278
1	5670547	5673648	RLOC_00001861	62	-	62.2	-61.4	0.363	0.834	96	185
1	5675494	5678873	RLOC_00001863	12	-	11.9	-9.9	0.808	1	187	318
1	5697215	5699870	RLOC_00001870	89	+	88.8	73.9	1	1	94	178
1	5702116	5713752	RLOC_00001871	459	+	458.9	423.5	1	1	443	822
1	5713793	5722614	RLOC_00001872	41	+	41.3	24.0	0.917	1	139	164
1	5722881	5729154	RLOC_00001873	281	+	281.1	265.3	1	1	1021	1582
1	5726319	5727407	RLOC_00001875	5	-	4.7	-3.8	0.485	0.926	232	327
1	5739230	5755483	RLOC_00001880	375	-	375.4	-228.8	0.693	1	77	175
1	5744334	5745259	RLOC_00001881	8	+	8.4	-7.7	0.65	1	82	151
1	5755587	5756924	RLOC_00001882	4	+	3.7	-0.8	0.766	1	398	655
1	5757507	5760521	RLOC_00001884	145	+	145.0	144.9	1	1	278	306
1	5762645	5764157	RLOC_00001886	4	-	3.8	3.3	0.39	0.858	403	729
1	5764806	5765798	RLOC_00001887	24	-	23.9	22.4	1	1	49	110
1	5767279	5770656	RLOC_00001888	34	+	34.1	-34.1	0.116	0.657	117	179
1	5770731	5773322	RLOC_00001889	55	-	55.0	7.9	0.137	0.664	116	170
1	5773568	5777828	RLOC_00001890	5	+	5.4	4.8	0.529	0.957	1216	1728
1	5776176	5778542	RLOC_00001891	4	-	3.9	-2.7	0.276	0.762	1285	2040
1	5779007	5782433	RLOC_00001892	50	-	50.0	45.4	0.608	1	83	170
1	5786481	5789262	RLOC_00001895	22	-	22.5	-21.2	0.351	0.824	442	754
1	5799694	5800887	RLOC_00001900	8	+	8.3	5.9	0.52	0.952	209	228
1	5820021	5822022	RLOC_00001905	22	+	22.4	22.3	1	1	160	411
1	5824770	5828295	RLOC_00001907	130	+	130.2	-129.3	0.134	0.664	31	56
1	5828914	5831383	RLOC_00001909	22	+	22.5	21.7	0.117	0.658	219	225
1	5831983	5835474	RLOC_00001910	377	-	377.2	374.9	1	1	29	44
1	5840185	5841719	RLOC_00001914	5	-	4.7	-2.4	0.846	1	304	413
1	5842167	5844367	RLOC_00001915	81	-	80.6	-80.6	0.102	0.645	66	92
1	5844483	5850934	RLOC_00001916	135	-	135.4	36.3	0.0286	0.436	120	190
1	5844562	5846527	RLOC_00001917	5	+	5.1	0.9	0.665	1	366	456
1	5851846	5853991	RLOC_00001918	27	+	26.9	-26.4	1	1	169	194
1	5860064	5862890	RLOC_00001923	48	-	47.8	-36.9	0.319	0.8	108	167
1	5867534	5869436	RLOC_00001926	29	+	28.6	17.7	0.000269	0.00779	132	208
1	5869542	5870883	RLOC_00001927	4	+	4.2	-2.9	0.0999	0.645	896	691
1	5875294	5876620	RLOC_00001929	12	+	11.9	11.2	0.0672	0.645	127	155
1	5878394	5880190	RLOC_00001930	2	+	2.3	-1.7	0.17	0.682	1267	1663
1	5879607	5884786	RLOC_00001931	18	-	18.4	3.7	0.478	0.921	294	340
1	5885006	5890500	RLOC_00001932	11	+	11.3	2.4	0.34	0.816	695	1110
1	5890615	5895141	RLOC_00001934	32	+	31.9	-25.9	0.608	1	73	106
1	5908845	5911698	RLOC_00001939	96	-	95.8	42.4	0.351	0.824	40	59
1	5916827	5920342	RLOC_00001942	16	-	16.2	12.5	0.448	0.9	380	605
1	5922331	5926400	RLOC_00001944	8	+	8.1	0.1	0.243	0.735	967	1649
1	5929814	5932005	RLOC_00001947	36	+	36.0	-35.6	0.441	0.895	51	95
1	5933779	5938817	RLOC_00001948	38	+	38.5	-31.5	0.755	1	83	104
1	5946447	5951657	RLOC_00001951	106	+	106.4	104.5	0.164	0.678	128	232
1	5968380	5969995	RLOC_00001958	4	-	4.5	3.5	0.679	1	103	124
1	5996379	5998560	RLOC_00001965	8	+	7.6	-5.3	0.969	1	75	130
1	6002895	6007420	RLOC_00001967	24	+	23.9	-21.1	0.618	1	177	310
1	6008436	6009420	RLOC_00001969	2	+	2.1	2.0	0.863	1	234	538
1	6017942	6023834	RLOC_00001971	72	+	71.6	71.1	0.194	0.699	141	283
1	6023464	6024331	RLOC_00001972	7	-	6.8	5.4	0.195	0.699	120	301
1	6024628	6027565	RLOC_00001973	117	-	116.8	100.2	0.134	0.664	88	134
1	6027430	6029115	RLOC_00001974	6	+	6.1	4.4	0.678	1	97	171
1	6034269	6037398	RLOC_00001977	45	+	44.6	-43.0	0.318	0.8	65	127
1	6037404	6038698	RLOC_00001978	55	-	54.9	52.9	0.124	0.66	42	90
1	6050130	6052628	RLOC_00001981	53	-	53.2	47.6	0.108	0.649	76	170
1	6061894	6063362	RLOC_00001985	2	+	2.4	-2.2	0.266	0.752	626	881
1	6069423	6072140	RLOC_00001988	18	-	18.2	-5.4	0.575	0.985	157	215
1	6076070	6082395	RLOC_00001992	262	+	262.3	-218.0	0.103	0.645	83	119
1	6089350	6090348	RLOC_00001994	7	+	6.7	-6.0	0.344	0.819	56	83
1	6090404	6092027	RLOC_00001995	3	-	3.4	-1.6	1	1	3826	6608
1	6093153	6098445	RLOC_00001996	142	-	142.1	-135.6	0.0999	0.645	219	384
1	6099038	6100397	RLOC_00001997	4	+	3.7	1.7	1	1	288	516
1	6100963	6105347	RLOC_00001999	18	+	18.0	16.0	0.184	0.692	635	1240
1	6110034	6116609	RLOC_00002003	394	-	394.2	-329.2	0.0616	0.645	83	98
1	6123556	6125339	RLOC_00002005	33	+	33.4	-33.4	0.092	0.645	106	139
1	6125276	6127918	RLOC_00002006	35	-	35.2	25.7	0.385	0.854	42	86
1	6135745	6138500	RLOC_00002010	29	-	28.7	-6.1	0.371	0.842	163	293
1	6142401	6146521	RLOC_00002013	8	+	8.1	-8.1	0.67	1	613	917
1	6145543	6148861	RLOC_00002014	66	-	65.5	-42.1	0.497	0.935	71	120
1	6149177	6150038	RLOC_00002016	1	+	0.8	-0.5	0.879	1	1022	1827
1	6149304	6153999	RLOC_00002017	56	-	56.3	55.4	0.0999	0.645	587	1160
1	6154253	6155830	RLOC_00002019	2	-	1.7	0.2	0.459	0.909	379	769
1	6166219	6168845	RLOC_00002024	38	-	37.5	27.8	0.737	1	75	89
1	6184716	6187567	RLOC_00002028	10	+	9.6	-6.0	0.846	1	144	209
1	6187510	6196204	RLOC_00002029	97	-	96.7	87.6	0.535	0.96	262	324
1	6199734	6207037	RLOC_00002030	228	+	228.1	221.6	0.207	0.709	125	172
1	6206863	6209531	RLOC_00002032	9	-	9.4	8.2	0.982	1	90	127
1	6211831	6213591	RLOC_00002035	22	-	22.4	22.4	0.0984	0.645	73	105
1	6213650	6218384	RLOC_00002036	14	-	14.2	-9.8	0.68	1	382	673
1	6220018	6221231	RLOC_00002039	17	+	16.9	16.8	0.0567	0.645	155	237
1	6222200	6224242	RLOC_00002040	19	+	18.8	18.7	0.0113	0.198	319	818
1	6244297	6247830	RLOC_00002047	18	-	18.5	-12.5	0.783	1	136	278
1	6248618	6257907	RLOC_00002048	133	+	132.6	113.9	0.137	0.664	282	405
1	6257694	6261445	RLOC_00002049	28	-	28.1	15.9	0.844	1	77	125
1	6265176	6268873	RLOC_00002053	1158	-	1158.4	1158.4	8.54e-14	2.22e-11	652	799
1	6276776	6278258	RLOC_00002059	19	-	19.3	-10.8	0.405	0.869	78	182
1	6278783	6282144	RLOC_00002060	23	-	22.5	-19.7	0.514	0.948	205	350
1	6282169	6293993	RLOC_00002061	131	-	130.7	-90.2	0.601	1	172	250
1	6305813	6313941	RLOC_00002067	587	-	587.2	-585.4	1	1	156	158
1	6316710	6324378	RLOC_00002069	61	-	61.3	26.2	0.735	1	198	372
1	6325535	6330179	RLOC_00002070	190	+	190.4	189.4	0.0516	0.645	110	125
1	6331404	6333877	RLOC_00002072	23	+	23.2	-21.6	0.329	0.807	90	192
1	6348047	6352010	RLOC_00002076	18	+	17.8	-4.4	0.306	0.79	261	431
1	6352329	6356261	RLOC_00002077	21	+	20.6	-16.9	0.326	0.805	321	349
1	6355694	6360344	RLOC_00002078	53	-	52.7	-52.0	1	1	250	383
1	6361616	6366311	RLOC_00002079	256	+	256.0	-251.2	0.00611	0.115	175	313
1	6366396	6368916	RLOC_00002080	4	+	4.5	-0.0	0.762	1	87	153
1	6368965	6373080	RLOC_00002081	15	+	14.9	-13.9	0.557	0.976	320	524
1	6376638	6378580	RLOC_00002085	1	-	1.0	-0.6	0.83	1	1126	2259
1	6389360	6391358	RLOC_00002088	42	+	41.7	-41.6	0.428	0.887	79	103
1	6395768	6398274	RLOC_00002089	35	+	35.2	-16.1	0.634	1	65	105
1	6398530	6400029	RLOC_00002090	16	+	16.5	-9.5	0.0725	0.645	154	351
1	6405607	6416514	RLOC_00002092	304	+	303.8	276.1	0.112	0.651	275	397
1	6416178	6421188	RLOC_00002093	356	-	356.1	348.7	0.00101	0.0242	310	557
1	6419038	6425898	RLOC_00002094	234	+	233.7	-231.7	0.181	0.69	111	150
1	6426708	6431093	RLOC_00002095	183	-	183.2	175.2	1	1	86	126
1	6431937	6433552	RLOC_00002096	29	-	28.8	28.3	1	1	90	189
1	6432929	6437236	RLOC_00002097	400	+	400.0	394.6	1	1	125	136
1	6437476	6444238	RLOC_00002098	271	+	271.1	261.6	1	1	98	209
1	6457774	6460405	RLOC_00002102	3	-	3.4	3.2	0.104	0.645	905	1724
1	6459211	6462367	RLOC_00002103	75	+	74.7	-59.8	0.268	0.753	71	132
1	6463806	6465566	RLOC_00002105	8	+	7.9	-6.5	1	1	476	874
1	6465463	6466483	RLOC_00002106	50	-	50.5	-49.8	1	1	343	846
1	6481046	6483599	RLOC_00002113	16	-	16.0	-15.7	0.167	0.681	334	465
1	6500752	6504567	RLOC_00002120	24	-	24.1	-20.6	0.666	1	126	242
1	6504676	6506542	RLOC_00002121	21	-	21.5	17.1	0.401	0.868	93	120
1	6515372	6519412	RLOC_00002124	28	+	28.2	19.6	0.325	0.805	194	231
1	6546176	6552108	RLOC_00002133	88	+	87.7	87.7	0.402	0.869	98	162
1	6557180	6558115	RLOC_00002137	12	-	12.0	8.8	0.0786	0.645	69	151
1	6558573	6562951	RLOC_00002138	13	-	13.4	-5.6	1	1	1654	2116
1	6565509	6570951	RLOC_00002139	52	+	51.6	46.4	0.301	0.785	238	388
1	6577424	6579321	RLOC_00002142	53	-	52.9	52.2	0.151	0.671	69	123
1	6584223	6586571	RLOC_00002144	36	+	35.5	-21.8	0.192	0.698	97	160
1	6594883	6601377	RLOC_00002147	403	+	402.9	-400.4	0.149	0.671	48	80
1	6602104	6606028	RLOC_00002148	27	+	27.4	26.7	1	1	359	452
1	6608067	6609480	RLOC_00002150	7	+	7.1	6.1	0.253	0.742	350	551
1	6609278	6613052	RLOC_00002152	8	-	7.7	6.5	0.977	1	565	977
1	6621776	6623620	RLOC_00002158	10	+	10.0	-1.7	0.101	0.645	450	844
1	6624905	6626217	RLOC_00002160	8	-	7.7	-7.6	0.11	0.65	322	738
1	6626793	6633133	RLOC_00002161	46	-	45.6	1.1	0.852	1	76	101
1	6649242	6650464	RLOC_00002165	7	-	6.8	1.2	0.64	1	184	269
1	6676209	6677680	RLOC_00002173	6	-	6.1	-5.8	1	1	157	300
1	6680396	6683559	RLOC_00002175	40	-	39.7	31.4	0.0652	0.645	210	298
1	6688531	6691216	RLOC_00002177	2	+	2.0	1.7	0.2	0.705	1145	1931
1	6689495	6692496	RLOC_00002178	19	-	19.5	13.4	0.923	1	65	144
1	6692716	6695620	RLOC_00002179	17	-	16.7	16.4	0.8	1	50	122
1	6697029	6697431	RLOC_00002180	8	+	7.7	7.2	0.608	1	44	114
1	6697873	6698858	RLOC_00002182	8	+	7.9	-6.4	0.455	0.906	104	214
1	6709772	6712437	RLOC_00002185	148	+	147.6	147.4	1	1	176	347
1	6711958	6716439	RLOC_00002186	11	-	11.1	-10.6	0.25	0.742	827	889
1	6724380	6728078	RLOC_00002190	25	-	24.6	-24.3	0.291	0.776	156	243
1	6731367	6734984	RLOC_00002192	29	-	28.5	-19.4	0.46	0.909	202	352
1	6759894	6762906	RLOC_00002200	29	+	28.7	28.6	0.197	0.702	90	177
1	6763745	6765177	RLOC_00002201	3	+	2.9	2.1	0.0579	0.645	531	614
1	6765649	6768290	RLOC_00002202	35	+	34.6	14.5	0.474	0.918	92	113
1	6773248	6774611	RLOC_00002206	1	-	1.1	1.1	1	1	2778	7894
1	6774682	6777568	RLOC_00002207	15	+	15.0	11.6	0.334	0.811	253	476
1	6778886	6781222	RLOC_00002208	17	+	16.8	6.4	0.439	0.894	132	246
1	6781428	6782207	RLOC_00002209	11	-	10.6	9.7	1	1	152	410
1	6799968	6802906	RLOC_00002214	1	-	1.0	0.2	0.923	1	2201	3934
1	6803425	6805091	RLOC_00002215	7	-	6.6	-6.2	0.02	0.322	410	1767
1	6805325	6807928	RLOC_00002216	39	+	39.3	32.8	0.1	0.645	62	97
1	6807679	6813063	RLOC_00002217	223	-	223.3	203.0	1	1	365	554
1	6814538	6816952	RLOC_00002219	49	+	48.7	14.9	0.13	0.66	69	174
1	6816611	6822745	RLOC_00002220	53	-	53.4	-34.6	0.42	0.881	442	613
1	6822843	6824210	RLOC_00002221	8	-	8.3	5.7	0.269	0.754	356	502
1	6824320	6826194	RLOC_00002222	11	+	10.7	-9.6	8.45e-06	0.000399	1217	1432
1	6832304	6834631	RLOC_00002224	3	+	2.8	-0.9	0.398	0.865	966	1194
1	6846332	6848122	RLOC_00002227	2	+	1.9	-0.1	0.94	1	142	288
1	6855898	6860563	RLOC_00002230	62	-	62.4	57.2	0.156	0.677	173	278
1	6886670	6891437	RLOC_00002232	44	+	43.7	15.1	0.771	1	102	163
1	6891362	6894752	RLOC_00002233	328	-	328.0	-318.6	1	1	89	158
1	6895008	6898818	RLOC_00002234	18	-	17.6	-17.3	0.526	0.956	352	425
1	6900288	6904157	RLOC_00002235	31	-	30.5	19.1	0.328	0.807	123	218
1	6913000	6914689	RLOC_00002238	2	+	2.3	-1.9	0.235	0.73	1167	2037
1	6914517	6916823	RLOC_00002239	9	-	8.7	-7.9	0.328	0.807	327	516
1	6927735	6928656	RLOC_00002243	4	+	3.8	0.8	0.147	0.671	307	1211
1	6933023	6935114	RLOC_00002246	33	+	32.8	-26.7	0.424	0.883	40	68
1	6935217	6936934	RLOC_00002247	10	+	9.8	8.8	0.936	1	89	158
1	6937718	6940832	RLOC_00002249	9	-	9.3	8.9	0.174	0.685	477	885
1	6942660	6945128	RLOC_00002252	3	+	3.0	-0.5	0.0808	0.645	1998	4678
1	6949000	6968965	RLOC_00002255	906	+	905.7	-901.4	1	1	378	634
1	6969024	6971049	RLOC_00002262	49	-	49.0	-48.8	0.00858	0.155	485	761
1	6971441	6977274	RLOC_00002263	20	+	19.7	-17.9	0.583	0.988	564	973
1	6986311	6987863	RLOC_00002267	6	+	5.6	-4.8	1	1	151	255
1	6987271	6993972	RLOC_00002268	27	-	27.5	-7.0	0.81	1	102	108
1	6998056	6999841	RLOC_00002271	8	-	7.9	-7.6	0.215	0.715	174	379
1	7001086	7004435	RLOC_00002272	18	-	17.7	15.2	0.17	0.682	332	631
1	7016598	7020690	RLOC_00002278	4	+	4.0	-1.8	0.85	1	742	1521
1	7020663	7023162	RLOC_00002279	54	-	54.3	48.0	0.165	0.679	80	153
1	7029576	7031555	RLOC_00002282	15	+	14.7	14.4	0.227	0.725	35	61
1	7038526	7040231	RLOC_00002285	7	-	7.0	6.3	0.0144	0.245	374	509
1	7042045	7043392	RLOC_00002286	1	-	0.7	-0.7	1	1	46965	79064
1	7043626	7044653	RLOC_00002287	5	+	4.5	1.8	0.969	1	37	149
1	7083160	7085858	RLOC_00002299	13	-	12.9	7.5	0.358	0.83	2800	4147
1	7087902	7089606	RLOC_00002301	1	-	0.8	-0.1	0.924	1	673	1277
1	7090940	7093442	RLOC_00002302	12	+	11.7	4.5	0.76	1	90	183
1	7094190	7094927	RLOC_00002305	23	+	23.4	-23.4	0.0921	0.645	74	74
1	7103361	7106121	RLOC_00002309	18	-	17.6	13.9	1	1	225	706
1	7112611	7115411	RLOC_00002313	33	+	32.7	32.6	0.271	0.756	117	193
1	7119645	7126559	RLOC_00002315	44	-	43.7	23.1	0.427	0.887	289	350
1	7126730	7128747	RLOC_00002316	20	-	19.5	13.8	1	1	219	324
1	7142619	7149908	RLOC_00002321	9	+	9.4	8.5	1	1	40953	90242
1	7154409	7158287	RLOC_00002322	36	+	35.7	-25.3	0.896	1	53	84
1	7157825	7160707	RLOC_00002323	16	-	15.8	-14.2	0.0577	0.645	361	487
1	7174276	7176617	RLOC_00002329	610	-	609.6	590.6	2.73e-06	0.000148	109	110
1	7176746	7178895	RLOC_00002331	2	+	1.9	-0.6	0.37	0.84	2424	4683
1	7179272	7181604	RLOC_00002332	3	+	2.6	-2.5	0.1	0.645	2871	5286
1	7209297	7214993	RLOC_00002341	97	+	97.0	-85.9	0.137	0.664	196	329
1	7215009	7216897	RLOC_00002342	25	-	25.1	-23.3	0.0821	0.645	125	202
1	7217020	7220865	RLOC_00002343	62	+	62.4	-53.1	0.28	0.763	98	168
1	7231980	7235128	RLOC_00002353	19	+	18.9	-13.3	0.68	1	370	596
1	7238692	7239698	RLOC_00002354	2	+	1.6	-0.4	0.9	1	153	238
1	7242895	7244981	RLOC_00002356	16	+	16.3	8.1	0.351	0.824	121	189
1	7244888	7248558	RLOC_00002357	25	-	25.5	25.0	0.109	0.65	174	269
1	7252110	7253747	RLOC_00002359	2	+	1.8	-1.8	0.711	1	247	417
1	7261995	7265555	RLOC_00002363	61	-	60.6	-55.7	0.199	0.703	115	143
1	7265791	7267392	RLOC_00002364	10	-	9.5	-3.1	0.834	1	105	176
1	7272526	7274935	RLOC_00002365	6	+	5.5	-3.4	0.85	1	122	126
1	7276897	7281236	RLOC_00002366	37	-	37.1	28.7	0.667	1	72	95
1	7285053	7292580	RLOC_00002367	39	+	38.8	16.4	0.0532	0.645	304	494
1	7292388	7294746	RLOC_00002369	11	-	10.9	-10.2	0.235	0.729	103	200
1	7297233	7310262	RLOC_00002371	403	-	402.8	400.8	1	1	387	671
1	7313900	7319921	RLOC_00002372	30	+	29.7	16.0	0.294	0.779	170	279
1	7324470	7329441	RLOC_00002373	50	+	50.0	-48.5	0.689	1	159	238
1	7337604	7339509	RLOC_00002376	37	+	36.7	-35.8	2.27e-08	2e-06	989	949
1	7346167	7347296	RLOC_00002378	8	+	8.1	3.1	0.19	0.698	132	263
1	7370610	7375893	RLOC_00002383	69	+	68.6	65.7	0.0038	0.076	913	1343
1	7375871	7378235	RLOC_00002384	60	-	59.8	49.3	0.0633	0.645	56	78
1	7378535	7382661	RLOC_00002385	10	-	10.3	-8.2	0.709	1	355	435
1	7386761	7388514	RLOC_00002387	2	-	2.0	-1.3	0.453	0.903	411	485
1	7389980	7391603	RLOC_00002388	3	-	3.3	-3.1	0.0869	0.645	108	155
1	7398813	7400820	RLOC_00002390	2	-	2.4	-1.9	1	1	1308	2891
1	7404327	7405426	RLOC_00002392	13	+	12.8	-11.9	0.113	0.651	137	102
1	7412567	7419656	RLOC_00002394	196	+	196.3	-187.5	0.0686	0.645	104	179
1	7419657	7420957	RLOC_00002395	2	-	2.3	-1.1	0.955	1	386	720
1	7421155	7427335	RLOC_00002396	1396	+	1396.4	1381.1	2.97e-05	0.00117	92	195
1	7439125	7442072	RLOC_00002402	12	+	11.7	-8.9	0.744	1	105	215
1	7444636	7448483	RLOC_00002405	35	+	34.9	24.0	0.159	0.677	163	317
1	7453233	7455076	RLOC_00002410	10	-	9.6	-9.6	1.26e-32	2.1e-29	21790	31816
1	7476889	7479258	RLOC_00002420	4	-	3.8	-1.0	0.416	0.878	528	679
1	7483780	7485675	RLOC_00002422	20	+	19.7	-10.4	0.704	1	89	129
1	7485635	7488780	RLOC_00002423	13	-	12.7	-6.2	0.836	1	155	289
1	7489045	7490803	RLOC_00002424	29	-	29.1	29.1	0.319	0.8	78	103
1	7493212	7499638	RLOC_00002428	354	+	353.6	342.6	2.79e-06	0.000151	1386	1660
1	7502081	7504275	RLOC_00002431	5	-	4.7	-2.4	0.678	1	277	574
1	7508678	7513472	RLOC_00002432	26	+	25.6	-24.8	0.158	0.677	211	287
1	7511749	7513481	RLOC_00002433	5	-	4.8	3.6	0.693	1	358	559
1	7518945	7521552	RLOC_00002435	89	-	88.6	86.7	1	1	61	97
1	7529704	7531108	RLOC_00002439	3	-	3.3	3.2	1	1	3944	7172
1	7534018	7534927	RLOC_00002441	5	-	5.5	-5.2	0.3	0.783	387	564
1	7552986	7553975	RLOC_00002447	13	-	13.4	11.9	0.104	0.645	41	62
1	7554670	7557112	RLOC_00002449	16	+	15.8	13.1	0.34	0.816	153	250
1	7557139	7565914	RLOC_00002450	369	-	369.1	316.0	1	1	107	186
1	7566193	7570014	RLOC_00002451	26	-	25.9	-5.5	0.299	0.783	292	541
1	7570844	7573847	RLOC_00002452	22	-	22.3	-18.6	0.0915	0.645	349	593
1	7573829	7578967	RLOC_00002453	122	+	121.7	118.7	0.231	0.727	67	109
1	7581007	7588177	RLOC_00002455	70	+	70.2	-6.6	0.639	1	184	196
1	7588413	7592952	RLOC_00002456	16	+	16.4	12.5	0.326	0.805	290	437
1	7592649	7604359	RLOC_00002457	221	-	221.3	-220.1	0.848	1	70	153
1	7610240	7612721	RLOC_00002460	1	+	1.5	-0.3	0.945	1	243	330
1	7612833	7615374	RLOC_00002461	2	+	2.5	-0.7	0.314	0.797	1631	2355
1	7615504	7618628	RLOC_00002462	112	+	112.3	-103.1	1	1	107	167
1	7619884	7624125	RLOC_00002465	68	-	67.5	-55.5	0.467	0.914	67	141
1	7626181	7628315	RLOC_00002467	4	+	4.3	1.0	0.963	1	219	469
1	7630097	7636688	RLOC_00002469	52	+	51.5	-51.4	0.83	1	104	137
1	7645609	7648855	RLOC_00002472	12	+	12.2	-11.0	1	1	671	1614
1	7649147	7654026	RLOC_00002473	105	+	104.7	-104.6	1	1	845	1257
1	7651571	7652288	RLOC_00002474	17	-	17.4	17.1	8.91e-09	8.92e-07	781	1619
1	7660886	7662743	RLOC_00002479	7	-	6.9	5.1	0.676	1	345	327
1	7666427	7668827	RLOC_00002481	24	+	23.9	-22.5	0.604	1	84	131
1	7690801	7692459	RLOC_00002490	13	-	12.8	12.2	0.0862	0.645	238	503
1	7696500	7698542	RLOC_00002491	5	+	4.6	1.5	0.941	1	345	414
1	7704147	7706355	RLOC_00002492	2	-	2.4	-1.1	0.304	0.787	1502	1861
1	7712818	7714459	RLOC_00002495	8	+	7.8	4.9	0.415	0.877	239	399
1	7754269	7758188	RLOC_00002509	34	+	34.4	-24.7	0.721	1	92	165
1	7767892	7770194	RLOC_00002512	19	+	19.4	-0.3	0.207	0.709	166	301
1	7771507	7773220	RLOC_00002513	8	+	8.0	-2.9	0.898	1	113	189
1	7772865	7781638	RLOC_00002515	104	-	103.8	90.9	0.414	0.877	128	189
1	7785707	7786477	RLOC_00002517	9	+	9.4	-8.5	1	1	300	536
1	7789132	7792201	RLOC_00002518	19	+	18.7	16.8	0.0972	0.645	299	635
1	7814662	7815722	RLOC_00002527	6	-	6.3	1.3	0.443	0.896	394	549
1	7823065	7823971	RLOC_00002529	12	+	11.6	-11.6	0.118	0.658	154	243
1	7826196	7828390	RLOC_00002530	10	+	9.7	-2.6	0.92	1	131	208
1	7828223	7830424	RLOC_00002532	102	-	102.3	-100.8	0.0614	0.645	84	161
1	7835780	7837411	RLOC_00002534	16	+	16.3	-16.0	1	1	860	950
1	7837486	7840898	RLOC_00002535	19	-	19.1	-11.0	0.839	1	131	191
1	7846458	7847836	RLOC_00002537	33	+	32.9	-32.6	0.363	0.835	64	75
1	7865472	7866422	RLOC_00002542	3	+	2.9	-1.1	0.583	0.988	389	784
1	7873866	7876018	RLOC_00002545	31	+	31.5	-11.6	0.00401	0.0793	225	329
1	7878758	7881395	RLOC_00002547	14	-	14.2	0.1	0.000126	0.00404	1747	3301
1	7886323	7889544	RLOC_00002550	151	+	151.0	148.6	0.0253	0.393	92	124
1	7892757	7897705	RLOC_00002552	44	-	43.6	-33.4	0.528	0.957	267	565
1	7897825	7900335	RLOC_00002553	5	-	5.2	-2.0	0.976	1	147	277
1	7903659	7906969	RLOC_00002556	99	-	98.9	37.4	0.358	0.83	49	48
1	7911900	7915093	RLOC_00002558	7	+	6.8	-3.5	0.0808	0.645	1025	1950
1	7919076	7921893	RLOC_00002560	30	+	30.1	15.1	0.13	0.66	433	670
1	7922251	7925097	RLOC_00002561	40	+	40.4	35.4	0.145	0.671	100	191
1	7925120	7927345	RLOC_00002562	6	+	6.0	-5.1	0.168	0.681	752	1354
1	7949475	7950900	RLOC_00002568	7	+	7.4	-4.7	0.391	0.858	344	619
1	7950561	7954453	RLOC_00002570	147	-	146.9	145.7	0.0607	0.645	277	466
1	7955420	7958575	RLOC_00002572	7	-	7.2	-7.1	0.091	0.645	597	725
1	7966473	7968692	RLOC_00002574	78	-	78.5	-75.9	0.0616	0.645	87	122
1	7994165	8002989	RLOC_00002580	52	-	51.7	38.5	0.864	1	121	185
1	7994193	7997786	RLOC_00002581	16	+	16.1	16.0	0.491	0.931	215	269
1	8003222	8004317	RLOC_00002582	4	+	4.4	-3.9	0.0948	0.645	437	711
1	8005931	8007583	RLOC_00002583	7	+	7.1	-5.8	1	1	543	611
1	8013348	8016150	RLOC_00002584	33	-	32.6	7.6	0.74	1	97	107
1	8027166	8028189	RLOC_00002588	0	+	0.2	0.0	0.41	0.874	4837	4373
1	8028082	8030136	RLOC_00002589	11	-	10.7	-9.5	0.806	1	119	207
1	8030586	8033156	RLOC_00002591	20	-	20.1	9.8	0.119	0.66	115	219
1	8046132	8052953	RLOC_00002593	110	+	109.9	-108.8	0.177	0.686	725	973
1	8061750	8067790	RLOC_00002595	119	+	118.6	116.9	1	1	127	216
1	8067870	8071582	RLOC_00002596	71	+	71.3	-70.7	1	1	1281	2283
1	8071788	8074357	RLOC_00002597	70	+	70.5	70.5	0.0819	0.645	80	108
1	8076414	8080603	RLOC_00002600	12	+	11.8	6.5	0.227	0.724	1026	2009
1	8080461	8083012	RLOC_00002602	10	-	9.6	-3.4	1	1	911	1383
1	8083183	8094509	RLOC_00002604	70	+	70.0	60.1	0.979	1	142	224
1	8095456	8097592	RLOC_00002606	352	-	352.0	-347.2	1	1	27	49
1	8098391	8102500	RLOC_00002607	83	+	83.4	-82.4	1	1	402	604
1	8102725	8103618	RLOC_00002608	18	+	17.6	-17.4	0.0647	0.645	64	101
1	8103611	8104605	RLOC_00002609	22	-	22.0	-9.5	0.156	0.677	75	162
1	8104992	8108361	RLOC_00002610	104	+	104.0	-93.2	1	1	126	186
1	8109573	8112061	RLOC_00002611	29	-	28.6	-27.5	0.176	0.686	191	323
1	8117285	8122151	RLOC_00002612	33	+	33.3	28.4	0.28	0.764	252	519
1	8130603	8134388	RLOC_00002616	42	-	42.4	-41.3	0.255	0.744	177	310
1	8139113	8140233	RLOC_00002618	3	+	2.9	0.4	0.833	1	147	306
1	8143226	8145174	RLOC_00002619	18	+	18.3	-2.7	0.788	1	67	94
1	8156503	8159185	RLOC_00002624	7	+	6.8	4.8	0.436	0.893	415	655
1	8164781	8166862	RLOC_00002626	18	+	17.8	14.9	0.208	0.71	218	323
1	8170607	8173085	RLOC_00002629	46	-	46.4	42.9	0.414	0.877	67	70
1	8180116	8183650	RLOC_00002631	7	-	7.1	2.8	0.27	0.755	851	1386
1	8195772	8196913	RLOC_00002633	3	+	2.8	0.9	0.806	1	94	155
1	8196446	8198331	RLOC_00002634	9	-	8.5	6.1	0.701	1	363	536
1	8198585	8199616	RLOC_00002636	11	+	11.4	-1.2	0.0778	0.645	118	248
1	8200323	8201267	RLOC_00002637	8	+	7.7	-7.7	6.98e-36	4.09e-32	11379	21594
1	8202145	8203301	RLOC_00002638	7	-	6.8	5.8	0.092	0.645	297	534
1	8206547	8207645	RLOC_00002642	3	+	2.8	2.2	0.678	1	116	197
1	8212646	8219652	RLOC_00002644	187	+	186.9	-182.4	0.318	0.8	108	239
1	8219807	8224547	RLOC_00002645	22	+	21.9	20.7	1	1	590	1318
1	8233952	8235019	RLOC_00002648	8	-	8.3	-6.8	0.406	0.871	79	172
1	8242360	8252056	RLOC_00002650	383	+	383.2	-376.4	0.0821	0.645	234	369
1	8256853	8258741	RLOC_00002653	7	-	7.1	6.3	0.0666	0.645	398	806
1	8260559	8266048	RLOC_00002655	153	-	152.9	152.5	0.132	0.663	91	132
1	8267809	8271996	RLOC_00002657	4	-	3.6	-3.5	1	1	3680	4328
1	8279553	8282421	RLOC_00002659	43	-	43.5	-13.7	0.186	0.694	75	159
1	8295077	8296941	RLOC_00002662	10	-	9.6	0.5	0.106	0.648	130	305
1	8308964	8310916	RLOC_00002668	4	-	4.2	4.1	0.225	0.721	1435	1613
1	8311966	8315876	RLOC_00002669	18	-	18.3	-8.3	0.0613	0.645	371	557
1	8314852	8315737	RLOC_00002670	5	+	5.1	3.6	0.772	1	42	91
1	8321589	8329910	RLOC_00002673	231	+	231.0	126.0	1	1	689	1009
1	8332892	8336430	RLOC_00002675	49	+	49.4	49.3	0.267	0.752	180	281
1	8336579	8338827	RLOC_00002676	3	+	2.5	-1.6	1	1	1834	3768
1	8385201	8386551	RLOC_00002699	5	+	5.1	1.1	0.619	1	146	153
1	8388296	8391623	RLOC_00002701	1	+	1.4	0.7	0.623	1	571	772
1	8395465	8398387	RLOC_00002702	21	+	21.2	-20.6	1	1	882	2152
1	8398114	8399836	RLOC_00002703	1	-	1.1	-0.8	0.112	0.651	1732	2708
1	8400055	8401550	RLOC_00002704	6	+	6.5	-1.1	0.747	1	140	276
1	8406662	8408530	RLOC_00002707	10	-	10.0	0.8	0.218	0.715	198	359
1	8420183	8422991	RLOC_00002711	7	+	6.9	6.0	0.131	0.66	646	1285
1	8422823	8425389	RLOC_00002713	40	-	40.0	30.1	0.643	1	93	171
1	8427242	8429570	RLOC_00002716	20	-	19.6	-19.4	0.222	0.719	352	445
1	8432061	8438811	RLOC_00002717	95	+	95.2	28.4	0.415	0.877	188	186
1	8441067	8447681	RLOC_00002719	46	+	46.0	-30.3	0.818	1	181	213
1	8478387	8481599	RLOC_00002726	15	-	15.2	14.2	0.113	0.651	480	870
1	8500118	8502065	RLOC_00002734	2	-	2.3	0.9	0.19	0.698	1011	1945
1	8502312	8506815	RLOC_00002735	142	-	142.4	120.9	0.00146	0.033	198	282
1	8506971	8508936	RLOC_00002737	6	+	6.1	-6.0	0.27	0.755	462	976
1	8520431	8524932	RLOC_00002743	115	+	114.5	83.9	0.777	1	40	74
1	8525333	8527087	RLOC_00002745	8	-	8.2	0.7	0.094	0.645	357	806
1	8529031	8532262	RLOC_00002747	65	-	65.4	-52.8	0.133	0.664	108	190
1	8540837	8542053	RLOC_00002751	12	+	11.6	11.6	1	1	136	154
1	8544273	8545628	RLOC_00002753	12	+	11.7	-11.6	1	1	298	438
1	8553312	8556750	RLOC_00002756	26	-	26.0	-24.9	1	1	488	518
1	8557214	8559066	RLOC_00002757	4	-	4.0	-1.0	0.884	1	376	624
1	8560397	8570594	RLOC_00002758	86	-	86.2	40.5	0.248	0.741	616	923
1	8586334	8588180	RLOC_00002764	19	+	18.9	16.8	0.0623	0.645	117	255
1	8604021	8607484	RLOC_00002770	20	-	20.4	-3.4	0.108	0.648	254	391
1	8612436	8620696	RLOC_00002774	62	-	61.8	42.4	0.969	1	115	174
1	8624037	8626465	RLOC_00002775	28	+	28.1	-16.6	0.255	0.744	72	136
1	8635192	8639082	RLOC_00002778	57	+	56.8	32.8	0.15	0.671	102	156
1	8638519	8640825	RLOC_00002779	17	-	16.8	9.2	0.411	0.876	201	319
1	8640560	8644436	RLOC_00002780	7	+	7.0	2.6	0.724	1	449	866
1	8651381	8653915	RLOC_00002788	63	-	63.0	-52.5	0.121	0.66	71	39
1	8661872	8664046	RLOC_00002793	5	+	4.5	-3.0	0.726	1	251	308
1	8664063	8665569	RLOC_00002794	5	+	4.9	-0.9	0.282	0.766	212	385
1	8665741	8672757	RLOC_00002795	51	+	51.0	44.1	0.427	0.886	124	209
1	8682197	8685325	RLOC_00002801	20	+	20.2	15.6	0.156	0.677	304	408
1	8685177	8688250	RLOC_00002802	13	-	13.2	2.4	0.437	0.893	496	921
1	8692810	8695083	RLOC_00002804	12	+	12.3	-3.9	0.119	0.66	352	629
1	8702360	8705879	RLOC_00002807	52	+	52.2	-50.1	0.0748	0.645	151	192
1	8710846	8711578	RLOC_00002810	2	-	1.7	1.3	0.614	1	376	982
1	8719932	8722761	RLOC_00002813	247	-	247.4	237.4	2.11e-06	0.000119	159	177
1	8725831	8727348	RLOC_00002816	7	-	6.8	3.9	0.586	0.991	169	388
1	8741835	8755604	RLOC_00002822	2212	+	2212.3	-2211.5	1	1	57	104
1	8755993	8756582	RLOC_00002823	2	-	2.5	-1.9	0.547	0.969	364	991
1	8835418	8839609	RLOC_00002848	29	-	29.0	-17.0	0.296	0.78	145	251
1	8839925	8842405	RLOC_00002850	5	-	5.3	0.9	0.569	0.981	525	753
1	8853533	8855874	RLOC_00002857	11	-	11.3	11.0	1	1	464	705
1	8860526	8861522	RLOC_00002859	1	+	0.6	-0.4	0.164	0.678	6488	13010
1	8863767	8866894	RLOC_00002861	37	+	37.1	-37.1	0.233	0.728	150	272
1	8867023	8869289	RLOC_00002862	34	+	34.2	-33.1	0.397	0.864	135	229
1	8889011	8894325	RLOC_00002869	28	-	27.5	-1.3	0.518	0.95	267	415
1	8900018	8909334	RLOC_00002872	1529	-	1528.9	1507.2	1	1	84	148
1	8903404	8906455	RLOC_00002873	30	+	30.0	-30.0	0.16	0.677	141	208
1	8911095	8912822	RLOC_00002874	11	-	10.7	-6.1	0.8	1	47	54
1	8915914	8918279	RLOC_00002876	12	+	11.9	-11.0	0.31	0.794	264	442
1	8922549	8924511	RLOC_00002878	12	+	11.7	-7.2	1	1	64	61
1	8933198	8935482	RLOC_00002881	5	-	4.7	-1.5	1	1	969	1865
1	8951161	8955160	RLOC_00002887	45	+	45.4	-31.3	0.454	0.904	187	323
1	8964543	8967562	RLOC_00002891	209	-	208.8	198.0	1	1	100	225
1	8976325	8978305	RLOC_00002893	2	+	1.6	-1.2	0.631	1	930	916
1	8981555	8983314	RLOC_00002894	6	-	6.0	-5.8	1	1	1448	1081
1	8991707	8995617	RLOC_00002895	64	-	64.1	-64.1	0.192	0.698	99	220
1	8996713	8999917	RLOC_00002896	93	-	92.6	86.3	0.0604	0.645	106	124
1	9002237	9004716	RLOC_00002897	25	-	25.2	-12.5	0.164	0.678	144	232
1	9020341	9023508	RLOC_00002901	96	+	95.8	33.7	0.12	0.66	94	83
1	9022523	9024170	RLOC_00002903	15	-	14.8	5.0	0.469	0.915	124	190
1	9024326	9027955	RLOC_00002904	79	-	78.6	-78.5	1	1	458	741
1	9028328	9032327	RLOC_00002905	21	-	21.3	-17.4	0.683	1	107	195
1	9038707	9043861	RLOC_00002908	23	-	22.6	19.2	0.28	0.763	486	595
1	9044421	9047049	RLOC_00002909	10	-	10.2	-8.2	0.437	0.893	208	178
1	9047238	9054961	RLOC_00002910	165	-	165.4	-140.9	0.681	1	62	98
1	9054672	9057020	RLOC_00002911	24	+	23.6	-20.6	0.321	0.801	132	212
1	9056976	9061140	RLOC_00002912	94	-	93.7	36.9	0.382	0.851	52	77
1	9063270	9075307	RLOC_00002913	828	-	827.9	827.9	1	1	305	390
1	9066280	9068693	RLOC_00002914	26	+	26.1	-19.5	0.423	0.883	159	204
1	9070892	9075586	RLOC_00002916	11	+	11.2	1.1	0.868	1	446	546
1	9075733	9076725	RLOC_00002917	22	-	22.3	22.0	0.214	0.714	101	225
1	9089468	9092560	RLOC_00002922	16	-	16.2	-12.3	0.521	0.953	235	277
1	9095767	9099768	RLOC_00002923	30	-	30.4	30.0	0.543	0.966	205	244
1	9113866	9114994	RLOC_00002928	17	+	16.8	-16.7	0.157	0.677	110	190
1	9143923	9146106	RLOC_00002939	15	-	15.1	12.6	0.152	0.672	268	451
1	9148580	9150250	RLOC_00002940	28	-	28.1	-27.9	0.161	0.677	56	126
1	9151627	9154762	RLOC_00002941	30	+	29.5	-13.9	0.536	0.96	125	266
1	9155090	9156370	RLOC_00002942	3	+	3.2	1.4	0.904	1	203	381
1	9163175	9165919	RLOC_00002949	23	-	23.3	20.5	0.826	1	51	89
1	9171127	9173064	RLOC_00002952	4	+	3.6	2.0	0.288	0.774	1121	2353
1	9178211	9181967	RLOC_00002954	39	+	38.6	26.0	0.527	0.956	119	217
1	9182007	9184393	RLOC_00002955	52	+	51.8	-50.5	0.312	0.796	35	80
1	9184566	9187578	RLOC_00002956	28	+	28.2	-28.0	1	1	480	574
1	9195511	9199671	RLOC_00002960	44	-	44.4	36.9	0.662	1	79	141
1	9205827	9207458	RLOC_00002961	4	+	4.1	-4.1	1	1	6725	12016
1	9207342	9209902	RLOC_00002962	25	-	25.2	-16.0	0.183	0.691	198	342
1	9210064	9214005	RLOC_00002963	56	+	56.3	54.3	0.544	0.967	205	339
1	9214071	9215557	RLOC_00002964	2	+	2.1	1.7	0.278	0.762	436	609
1	9215769	9218010	RLOC_00002965	8	+	7.9	3.1	0.203	0.707	292	509
1	9224058	9225792	RLOC_00002967	9	-	8.6	-8.5	0.147	0.671	174	331
1	9244952	9246633	RLOC_00002974	7	-	6.6	-1.2	0.993	1	146	265
1	9246755	9248292	RLOC_00002975	7	+	6.5	-4.2	0.907	1	169	291
1	9250030	9251654	RLOC_00002978	10	-	10.0	8.0	0.093	0.645	168	229
1	9259431	9261313	RLOC_00002982	8	+	8.2	3.3	0.361	0.833	219	534
1	9284760	9286334	RLOC_00002991	13	-	13.4	6.8	0.168	0.681	300	300
1	9292445	9293862	RLOC_00002995	31	-	30.6	29.6	1	1	108	225
1	9295640	9300796	RLOC_00002996	73	+	73.5	73.2	1	1	270	449
1	9300805	9304328	RLOC_00002997	11	-	11.2	-4.7	0.194	0.699	641	1198
1	9315304	9318277	RLOC_00003000	6	-	5.8	-1.9	0.463	0.911	1263	2518
1	9321659	9324395	RLOC_00003004	7	+	7.4	5.2	0.949	1	148	289
1	9329383	9332148	RLOC_00003006	9	+	9.0	-8.5	0.249	0.742	430	751
1	9343113	9345323	RLOC_00003009	20	+	19.8	-12.9	0.709	1	68	105
1	9355826	9357502	RLOC_00003012	48	+	47.7	46.9	0.126	0.66	63	114
1	9373884	9376828	RLOC_00003016	8	+	7.7	-6.5	0.414	0.877	343	611
1	9378403	9380790	RLOC_00003018	6	+	6.2	-4.1	0.254	0.743	728	1666
1	9381526	9384060	RLOC_00003019	7	+	7.0	-6.8	0.084	0.645	673	1306
1	9393674	9396858	RLOC_00003022	48	+	47.7	-43.6	0.518	0.95	169	363
1	9396613	9399483	RLOC_00003023	88	-	88.5	-87.3	0.0783	0.645	68	122
1	9403752	9406369	RLOC_00003025	5	-	5.1	-1.0	0.706	1	379	680
1	9407084	9411368	RLOC_00003026	16	-	16.0	10.4	0.834	1	181	327
1	9425279	9426897	RLOC_00003030	5	+	4.7	-2.0	1	1	1157	2183
1	9428991	9432307	RLOC_00003033	60	+	59.6	-47.8	0.172	0.682	138	203
1	9446596	9449046	RLOC_00003037	6	-	5.7	-5.4	0.437	0.893	362	592
1	9449293	9451777	RLOC_00003038	11	-	11.0	-10.6	0.2	0.705	125	226
1	9455276	9458176	RLOC_00003040	8	-	7.6	-1.0	0.657	1	377	482
1	9481404	9482992	RLOC_00003053	5	+	5.2	-4.4	1	1	1079	1298
1	9483127	9484686	RLOC_00003054	7	+	6.7	-2.8	0.198	0.703	407	556
1	9484315	9486002	RLOC_00003056	3	-	2.8	-2.2	0.931	1	526	866
1	9486888	9492632	RLOC_00003057	31	+	30.8	-29.0	0.0736	0.645	652	872
1	9492848	9494382	RLOC_00003058	3	+	3.2	0.5	0.425	0.884	743	1361
1	9495343	9498085	RLOC_00003059	13	+	12.9	-5.0	0.799	1	167	316
1	9497999	9499639	RLOC_00003060	2	-	1.7	0.0	0.759	1	556	1218
1	9505111	9508542	RLOC_00003062	39	-	39.0	17.7	0.626	1	102	140
1	9508679	9512860	RLOC_00003063	65	-	65.5	36.4	0.0866	0.645	283	471
1	9513080	9515050	RLOC_00003064	9	-	9.1	2.1	0.805	1	274	457
1	9515113	9517070	RLOC_00003065	2	+	1.7	1.0	0.806	1	1560	3134
1	9527455	9528866	RLOC_00003069	10	-	9.7	9.5	1	1	409	856
1	9528966	9531489	RLOC_00003070	20	-	20.1	-14.0	0.889	1	94	141
1	9531808	9534141	RLOC_00003071	7	+	7.0	4.6	1	1	901	1950
1	9534499	9537728	RLOC_00003072	13	+	12.6	11.4	0.132	0.664	79	142
1	9544409	9546285	RLOC_00003075	14	+	14.3	13.9	0.52	0.951	118	217
1	9551450	9554422	RLOC_00003077	111	-	111.2	-111.2	0.257	0.744	52	59
1	9554709	9558461	RLOC_00003078	31	-	31.1	26.6	0.457	0.908	149	208
1	9558561	9562485	RLOC_00003079	170	+	169.6	-131.1	0.00393	0.0779	175	237
1	9562486	9564031	RLOC_00003080	3	-	2.8	2.7	1	1	692	1302
1	9565857	9567906	RLOC_00003082	45	-	45.1	44.2	1	1	268	547
1	9592092	9603548	RLOC_00003091	1617	+	1617.4	-1607.0	1	1	121	162
1	9614550	9616574	RLOC_00003097	22	+	22.2	-22.0	6.23e-05	0.00219	472	770
1	9627532	9628749	RLOC_00003099	34	-	34.0	-34.0	1	1	47	44
1	9636587	9640225	RLOC_00003102	22	+	22.2	-17.2	0.713	1	340	626
1	9648020	9649323	RLOC_00003106	2	-	2.2	2.0	0.907	1	229	261
1	9657172	9661994	RLOC_00003108	77	+	77.1	-74.2	0.173	0.683	108	166
1	9662020	9667595	RLOC_00003109	184	+	184.0	171.1	0.257	0.744	77	134
1	9668507	9671657	RLOC_00003110	10	+	9.7	7.5	0.215	0.715	619	838
1	9671631	9676307	RLOC_00003111	19	-	19.5	12.6	0.627	1	273	456
1	9692975	9696546	RLOC_00003118	43	-	42.9	-37.6	0.493	0.932	89	134
1	9698297	9704013	RLOC_00003119	199	+	199.3	-199.2	1	1	130	156
1	9715348	9720620	RLOC_00003124	89	-	89.2	57.8	0.491	0.931	79	124
1	9720727	9724800	RLOC_00003125	50	-	50.3	-34.8	0.723	1	75	178
1	9726606	9733000	RLOC_00003126	135	-	135.1	-130.0	0.32	0.801	377	590
1	9740583	9742497	RLOC_00003129	4	+	4.3	-4.1	0.159	0.677	742	1285
1	9746708	9752775	RLOC_00003131	24	+	23.5	-21.8	0.736	1	1090	1858
1	9763210	9768157	RLOC_00003136	410	+	409.7	-408.7	1	1	57	82
1	9775521	9778043	RLOC_00003140	5	-	5.2	3.0	0.492	0.932	57	124
1	9778850	9784069	RLOC_00003141	129	+	128.6	126.5	0.113	0.651	157	281
1	9795717	9799118	RLOC_00003143	35	+	35.4	10.4	0.584	0.988	61	164
1	9800346	9804555	RLOC_00003145	157	+	157.1	42.8	1	1	114	218
1	9803063	9806887	RLOC_00003147	40	-	40.0	25.0	0.347	0.822	137	221
1	9812929	9815565	RLOC_00003148	18	-	17.9	17.5	0.41	0.875	269	491
1	9825270	9828528	RLOC_00003149	10	+	10.4	-8.1	0.928	1	156	192
1	9829137	9834487	RLOC_00003150	401	-	400.9	394.7	2.04e-08	1.83e-06	651	688
1	9834641	9836210	RLOC_00003152	2	-	2.4	1.2	0.569	0.981	833	1680
1	9846746	9848015	RLOC_00003156	11	-	11.4	-5.8	0.781	1	84	137
1	9849843	9852449	RLOC_00003158	23	-	23.5	5.1	0.36	0.832	158	265
1	9862040	9864779	RLOC_00003161	14	-	14.1	5.9	0.959	1	91	243
1	9868199	9872250	RLOC_00003162	16	-	16.4	-11.5	0.806	1	158	223
1	9874202	9875615	RLOC_00003163	3	+	2.9	-0.2	1	1	143	250
1	9875466	9879433	RLOC_00003164	47	-	46.9	-18.0	0.128	0.66	189	213
1	9884274	9887666	RLOC_00003168	29	-	28.5	28.2	1	1	344	403
1	9889100	9891015	RLOC_00003169	2	-	2.2	-1.7	1	1	2278	3805
1	9911796	9913957	RLOC_00003173	34	-	34.2	-26.8	0.301	0.785	120	147
1	9920144	9924484	RLOC_00003174	47	-	46.7	-23.2	0.337	0.814	128	247
1	9933732	9935440	RLOC_00003177	3	-	2.8	-1.0	0.366	0.837	2568	2737
1	9940000	9943661	RLOC_00003180	39	+	38.8	-37.6	1	1	318	501
1	9943736	9949853	RLOC_00003181	412	+	412.2	412.1	0.115	0.655	40	53
1	9955773	9956960	RLOC_00003183	15	-	15.3	-14.9	0.465	0.913	60	189
1	9963447	9966320	RLOC_00003185	42	+	41.6	27.7	0.42	0.881	74	84
1	9969309	9973893	RLOC_00003188	176	-	175.9	170.8	0.11	0.65	348	527
1	9976140	9979793	RLOC_00003189	59	-	59.4	1.9	0.00404	0.0795	169	286
1	9979477	9987737	RLOC_00003190	84	+	83.9	-65.8	0.736	1	172	277
1	9996712	10000455	RLOC_00003193	6	+	5.6	3.7	0.807	1	277	355
1	10015898	10018160	RLOC_00003202	10	+	10.0	0.2	0.983	1	86	211
1	10023816	10026311	RLOC_00003204	31	+	31.0	30.3	0.289	0.775	97	187
1	10029062	10032032	RLOC_00003205	11	+	10.7	4.5	0.521	0.952	378	656
1	10031935	10036041	RLOC_00003206	85	-	84.8	45.6	0.325	0.805	59	104
1	10035666	10037662	RLOC_00003207	10	+	9.8	3.9	0.676	1	145	213
1	10044336	10046552	RLOC_00003211	23	-	23.4	-22.7	0.0788	0.645	345	662
1	10050936	10053218	RLOC_00003214	25	-	25.2	4.8	0.551	0.971	182	289
1	10071608	10073584	RLOC_00003220	8	-	8.0	8.0	0.0541	0.645	265	412
1	10074358	10076457	RLOC_00003221	4	-	3.7	-3.0	0.598	0.998	371	677
1	10078196	10081681	RLOC_00003223	19	+	19.1	14.4	0.141	0.667	323	513
1	10086358	10095222	RLOC_00003226	148	-	148.0	-83.7	0.482	0.925	88	170
1	10095812	10102928	RLOC_00003238	207	-	207.3	126.5	0.659	1	46	64
1	10105024	10111744	RLOC_00003251	833	-	832.7	-828.0	4.84e-07	3.22e-05	213	367
1	10124285	10127098	RLOC_00003263	16	-	15.8	3.7	0.728	1	102	194
1	10134055	10136241	RLOC_00003267	20	+	20.5	19.0	0.0701	0.645	392	748
1	10136130	10139176	RLOC_00003270	6	-	5.6	4.6	0.826	1	576	1038
1	10147604	10151539	RLOC_00003272	43	+	42.6	39.1	1	1	2643	4773
1	10174186	10178521	RLOC_00003280	21	+	20.7	17.9	0.706	1	272	461
1	10180301	10182808	RLOC_00003282	8	+	7.6	0.0	0.0563	0.645	874	1491
1	10183389	10184512	RLOC_00003283	22	-	22.0	21.9	0.144	0.67	40	96
1	10190136	10195213	RLOC_00003284	318	-	317.8	317.0	0.405	0.869	26	36
1	10210182	10212722	RLOC_00003290	17	-	17.1	-3.7	0.97	1	49	85
1	10223176	10224720	RLOC_00003293	4	-	3.6	-3.2	0.878	1	275	541
1	10224814	10226322	RLOC_00003294	5	+	4.6	3.2	0.87	1	255	381
1	10229807	10231384	RLOC_00003295	47	+	46.6	46.3	1	1	74	130
1	10236336	10237990	RLOC_00003296	25	+	25.1	-17.0	1	1	283	619
1	10252240	10254792	RLOC_00003299	18	+	17.6	-12.5	0.466	0.913	133	319
1	10255250	10258440	RLOC_00003300	18	+	18.4	-8.5	0.773	1	89	152
1	10258212	10261232	RLOC_00003301	14	-	13.6	7.7	0.116	0.656	88	195
1	10264042	10266917	RLOC_00003302	21	+	20.8	-20.6	0.444	0.896	178	232
1	10286066	10288103	RLOC_00003309	15	-	15.2	-7.6	0.173	0.683	173	319
1	10288128	10289666	RLOC_00003310	9	-	9.0	-1.1	0.0758	0.645	614	773
1	10289981	10294630	RLOC_00003311	8	-	7.7	-0.5	0.558	0.976	879	1179
1	10297749	10300073	RLOC_00003312	134	-	134.4	131.3	1	1	63	122
1	10300200	10301457	RLOC_00003314	81	+	81.4	-79.8	0.000761	0.0192	372	1041
1	10301376	10302099	RLOC_00003315	30	-	30.2	-29.9	0.157	0.677	68	53
1	10302178	10303389	RLOC_00003317	7	-	7.1	-1.3	0.13	0.66	213	354
1	10304269	10305348	RLOC_00003319	5	-	4.8	-4.7	0.224	0.721	171	257
1	10305515	10306951	RLOC_00003320	17	-	16.9	16.8	1	1	142	170
1	10307351	10308246	RLOC_00003321	15	-	15.1	-11.7	0.0815	0.645	182	228
1	10308519	10309896	RLOC_00003322	38	+	38.1	-36.8	0.113	0.651	288	394
1	10310130	10314147	RLOC_00003327	4	-	4.1	4.1	0.274	0.759	1028	1899
1	10320988	10321968	RLOC_00003331	4	+	4.4	-3.8	0.421	0.881	334	369
1	10322516	10324836	RLOC_00003332	162	+	161.7	156.1	1	1	325	446
1	10323339	10326817	RLOC_00003333	141	-	141.2	121.2	0.000409	0.0111	141	163
1	10371674	10374005	RLOC_00003346	19	+	19.1	-17.8	0.107	0.648	354	585
1	10375650	10377908	RLOC_00003347	11	+	11.0	-5.1	0.068	0.645	567	860
1	10378979	10382153	RLOC_00003349	16	-	16.2	11.9	0.674	1	161	227
1	10384929	10387669	RLOC_00003351	30	-	29.5	-18.9	0.0821	0.645	142	246
1	10413852	10420774	RLOC_00003356	80	-	79.9	72.7	0.647	1	92	135
1	10422291	10425801	RLOC_00003357	34	+	33.6	-28.8	0.102	0.645	130	186
1	10429818	10432271	RLOC_00003360	8	+	7.8	1.7	0.841	1	213	296
1	10432600	10435482	RLOC_00003361	26	+	26.3	-16.9	0.745	1	73	101
1	10435213	10437770	RLOC_00003362	19	-	19.0	-14.9	0.602	1	140	234
1	10447346	10449969	RLOC_00003366	22	+	22.4	14.8	0.304	0.788	188	343
1	10459382	10462938	RLOC_00003369	25	-	25.1	-23.5	0.141	0.667	221	404
1	10463098	10467626	RLOC_00003370	77	+	76.6	57.9	0.213	0.713	75	161
1	10468010	10473420	RLOC_00003371	46	+	46.3	27.1	1	1	286	399
1	10472185	10473502	RLOC_00003372	1	-	0.8	-0.6	1	1	34863	66583
1	10474112	10475997	RLOC_00003373	1	-	1.2	-0.6	1	1	36628	61783
1	10477856	10479218	RLOC_00003374	1	+	0.6	0.4	1	1	58662	115910
1	10491556	10494603	RLOC_00003378	14	+	14.3	2.4	0.48	0.922	267	393
1	10494626	10496205	RLOC_00003379	20	+	20.2	17.0	0.813	1	38	64
1	10498178	10501498	RLOC_00003381	197	-	196.6	194.1	1	1	557	737
1	10503238	10506189	RLOC_00003382	69	-	69.4	62.0	1	1	97	226
1	10507532	10509160	RLOC_00003383	10	+	9.5	0.3	0.14	0.665	390	682
1	10509150	10512558	RLOC_00003384	24	-	23.7	-16.4	0.591	0.994	94	154
1	10513178	10516552	RLOC_00003385	40	+	39.9	39.4	0.633	1	52	71
1	10546420	10548221	RLOC_00003391	19	-	19.4	16.0	0.35	0.824	98	151
1	10559495	10561545	RLOC_00003393	5	-	4.8	-4.5	0.34	0.816	125	190
1	10581734	10584152	RLOC_00003395	45	+	44.6	-44.6	1	1	166	208
1	10587470	10590209	RLOC_00003397	17	+	16.8	-5.1	0.438	0.894	166	238
1	10624993	10627176	RLOC_00003406	6	+	6.1	-4.9	0.507	0.943	366	519
1	10626649	10630630	RLOC_00003407	25	-	25.3	-0.3	0.605	1	120	184
1	10638877	10640963	RLOC_00003409	3	+	2.6	1.6	1	1	1725	2785
1	10650913	10651829	RLOC_00003412	8	+	7.7	-6.3	0.591	0.994	123	243
1	10654799	10658924	RLOC_00003413	58	+	58.3	-39.9	1	1	360	581
1	10680068	10683137	RLOC_00003421	17	+	16.8	-15.5	0.665	1	156	178
1	10685821	10690988	RLOC_00003422	23	-	22.9	1.9	0.617	1	319	489
1	10715481	10718997	RLOC_00003425	8	+	8.4	-7.1	0.131	0.662	640	942
1	10722172	10725016	RLOC_00003427	1	+	1.1	1.0	1	1	32641	61262
1	10727316	10738108	RLOC_00003428	41	+	41.1	38.8	0.543	0.966	662	988
1	10738682	10747563	RLOC_00003429	87	+	86.9	-40.4	0.702	1	156	192
1	10762707	10770958	RLOC_00003433	318	+	317.6	-316.7	0.0195	0.316	105	160
1	10779144	10786810	RLOC_00003437	94	+	94.1	73.5	0.554	0.973	153	230
1	10788202	10790241	RLOC_00003439	26	-	25.9	-12.4	0.486	0.927	86	214
1	10789697	10792725	RLOC_00003440	8	+	7.7	7.7	1	1	108	200
1	10796123	10801093	RLOC_00003441	89	-	88.6	-88.3	0.44	0.895	65	120
1	10803627	10806317	RLOC_00003442	14	-	14.4	3.4	0.128	0.66	394	579
1	10806925	10809189	RLOC_00003443	1	-	1.0	0.5	0.908	1	238	439
1	10814611	10816615	RLOC_00003447	21	+	21.3	5.5	1	1	211	517
1	10816615	10819421	RLOC_00003448	15	-	15.3	0.7	0.646	1	154	231
1	10828372	10831656	RLOC_00003452	28	+	28.1	26.2	0.641	1	99	155
1	10829312	10840845	RLOC_00003453	41	-	40.6	17.8	0.56	0.976	873	1513
1	10841106	10845242	RLOC_00003454	218	-	217.9	216.7	1	1	67	84
1	10854548	10858322	RLOC_00003456	29	+	28.7	14.6	0.856	1	62	106
1	10858174	10860280	RLOC_00003457	11	-	10.6	9.8	1	1	653	1274
1	10887606	10890407	RLOC_00003463	7	+	6.8	2.1	0.965	1	188	402
1	10904774	10905724	RLOC_00003469	5	-	5.1	-4.8	0.461	0.909	99	155
1	10944890	10949485	RLOC_00003483	33	-	33.3	-28.1	0.578	0.987	298	209
1	10960907	10963252	RLOC_00003485	44	+	43.9	-10.3	0.555	0.974	47	72
1	10966889	10968949	RLOC_00003487	85	+	84.8	-84.5	0.0965	0.645	118	182
1	10991291	10994209	RLOC_00003493	14	-	13.9	10.7	0.00561	0.107	1009	1338
1	10991477	10993083	RLOC_00003494	4	+	3.8	-2.8	0.877	1	161	235
1	10994242	10996223	RLOC_00003495	5	+	4.7	3.3	0.735	1	168	269
1	11000883	11003618	RLOC_00003497	25	+	24.7	24.7	1	1	151	379
1	11040249	11043773	RLOC_00003510	41	-	40.7	-38.9	0.361	0.833	170	209
1	11057104	11059037	RLOC_00003517	19	+	18.6	-12.0	0.27	0.755	107	212
1	11069227	11072311	RLOC_00003520	35	-	34.5	-28.5	0.775	1	76	56
1	11084665	11088628	RLOC_00003522	176	+	176.4	171.6	0.0909	0.645	98	200
1	11104225	11108128	RLOC_00003531	32	-	31.8	28.2	0.685	1	192	302
1	11114692	11116195	RLOC_00003532	4	-	4.4	2.8	0.946	1	129	267
1	11122585	11124258	RLOC_00003535	11	-	10.8	-10.4	0.0667	0.645	309	587
1	11133409	11135302	RLOC_00003538	78	+	77.7	75.0	1.03e-06	6.43e-05	735	732
1	11137239	11142726	RLOC_00003540	888	+	888.4	888.0	0.000347	0.00966	145	153
1	11142460	11144725	RLOC_00003542	12	-	11.8	11.3	0.145	0.671	151	335
1	11144743	11147628	RLOC_00003543	56	+	56.2	56.0	1	1	214	207
1	11158539	11163470	RLOC_00003547	61	-	60.8	-56.2	0.146	0.671	123	299
1	11170917	11172090	RLOC_00003554	5	+	5.2	4.9	0.531	0.959	158	225
1	11188119	11192585	RLOC_00003559	166	+	165.9	141.6	0.412	0.877	32	50
1	11193345	11196426	RLOC_00003560	17	+	17.5	-6.5	0.527	0.956	295	426
1	11214675	11216141	RLOC_00003564	0	-	0.4	0.0	1	1	38537	66308
1	11216809	11217546	RLOC_00003565	2	-	2.3	1.5	0.0832	0.645	169	218
1	11217694	11219618	RLOC_00003566	7	-	6.9	6.3	0.328	0.807	340	617
1	11246816	11249587	RLOC_00003575	61	-	61.4	60.1	1	1	129	170
1	11249617	11253944	RLOC_00003576	5	+	4.6	4.4	0.729	1	830	1222
1	11255807	11258832	RLOC_00003578	68	-	68.2	-68.2	0.0766	0.645	137	287
1	11265863	11273315	RLOC_00003581	221	+	221.4	71.0	0.131	0.66	132	174
1	11288356	11293802	RLOC_00003587	1285	-	1284.6	1242.0	8.72e-09	8.81e-07	140	232
1	11310782	11312132	RLOC_00003593	21	+	20.8	-12.6	0.0152	0.256	176	469
1	11312960	11316582	RLOC_00003594	16	-	15.6	-10.4	0.947	1	151	207
1	11330923	11333540	RLOC_00003599	17	-	17.5	16.0	0.203	0.707	141	266
1	11349696	11355587	RLOC_00003602	142	+	141.7	141.7	0.3	0.783	98	147
1	11356075	11365098	RLOC_00003603	36	+	36.3	5.5	0.533	0.959	334	647
1	11372393	11374301	RLOC_00003606	21	-	21.0	15.4	0.868	1	43	120
1	11374759	11377885	RLOC_00003607	36	-	35.8	-13.5	0.423	0.883	116	225
1	11396142	11399779	RLOC_00003611	14	+	13.6	8.8	0.741	1	373	678
1	11399606	11406809	RLOC_00003612	358	-	357.8	341.8	0.107	0.648	57	76
1	11410430	11414517	RLOC_00003613	6	-	5.5	0.6	1	1	6066	9947
1	11414694	11416444	RLOC_00003614	15	-	15.1	-3.8	0.249	0.741	146	329
1	11416445	11420998	RLOC_00003615	138	-	137.8	-124.9	0.0989	0.645	298	514
1	11434059	11436607	RLOC_00003619	43	-	42.8	-36.7	0.395	0.862	229	413
1	11436718	11440275	RLOC_00003620	136	+	136.1	-31.8	1	1	85	105
1	11453577	11455684	RLOC_00003622	244	+	244.5	224.8	1	1	73	101
1	11454020	11455254	RLOC_00003623	6	-	6.0	5.1	0.0978	0.645	541	790
1	11456801	11463896	RLOC_00003624	9	+	9.0	-7.0	0.91	1	592	1226
1	11464933	11469207	RLOC_00003626	34	+	34.2	30.5	0.366	0.837	158	203
1	11469456	11470047	RLOC_00003627	2	+	2.3	-1.6	0.489	0.929	173	248
1	11469984	11471462	RLOC_00003628	19	-	18.6	18.6	1	1	183	374
1	11528384	11531350	RLOC_00003651	13	+	13.5	3.6	1	1	639	1098
1	11532107	11534745	RLOC_00003652	3	+	3.2	-2.5	1	1	6698	9075
1	11534157	11536435	RLOC_00003653	6	-	6.3	4.7	0.219	0.718	600	1104
1	11537241	11539896	RLOC_00003654	11	-	11.3	-4.2	0.571	0.983	284	393
1	11539987	11544166	RLOC_00003655	32	-	31.5	23.1	0.522	0.953	97	126
1	11546159	11548016	RLOC_00003656	22	-	22.1	-22.0	0.178	0.686	86	136
1	11558617	11561920	RLOC_00003660	19	-	19.0	-15.8	0.331	0.808	243	439
1	11565511	11570454	RLOC_00003662	14	+	14.1	10.8	0.866	1	542	848
1	11592922	11596056	RLOC_00003666	273	-	272.6	-269.0	1	1	85	95
1	11601670	11605174	RLOC_00003669	26	-	25.5	24.6	0.267	0.752	149	280
1	11605605	11607866	RLOC_00003670	28	-	27.9	27.9	1.12e-08	1.07e-06	569	1196
1	11607862	11610074	RLOC_00003671	5	+	4.8	-1.6	0.486	0.927	448	613
1	11611927	11617419	RLOC_00003673	6	+	5.6	2.7	0.943	1	1410	2123
1	11640544	11641966	RLOC_00003676	10	-	10.2	-8.6	0.45	0.901	170	312
1	11653499	11654833	RLOC_00003680	4	+	4.4	-2.1	0.181	0.69	151	256
1	11656959	11660468	RLOC_00003682	120	-	119.7	-117.6	0.395	0.862	52	70
1	11676944	11680862	RLOC_00003689	65	+	64.9	62.3	0.196	0.7	209	230
1	11684616	11686099	RLOC_00003692	42	+	41.7	-17.8	0.0579	0.645	90	189
1	11689063	11691588	RLOC_00003695	6	-	5.9	-5.3	1	1	476	754
1	11712054	11716431	RLOC_00003701	60	+	60.3	-35.2	0.568	0.981	67	109
1	11715078	11719963	RLOC_00003702	3	-	2.8	1.6	0.894	1	1727	2420
1	11738156	11739386	RLOC_00003703	1	+	1.3	-0.9	1	1	2203	2602
1	11738296	11740435	RLOC_00003704	2	-	2.2	1.7	0.0943	0.645	1934	3411
1	11742023	11754385	RLOC_00003706	579	-	578.9	-578.9	1	1	425	817
1	11757098	11762650	RLOC_00003709	176	-	175.6	-50.2	2.18e-05	0.000903	477	533
1	11767395	11770049	RLOC_00003710	20	+	20.4	-19.4	0.168	0.681	270	431
1	11771620	11774294	RLOC_00003711	42	-	42.5	42.5	1	1	180	272
1	11783542	11785704	RLOC_00003716	3	+	2.9	-1.6	0.944	1	361	568
1	11798118	11801407	RLOC_00003723	17	-	16.6	-16.4	0.0111	0.194	714	1123
1	11820871	11821824	RLOC_00003728	8	-	8.4	-7.6	0.00694	0.129	183	311
1	11827358	11829933	RLOC_00003729	28	+	27.7	-27.6	1	1	1001	1071
1	11844659	11846356	RLOC_00003734	44	+	44.3	42.6	0.413	0.877	49	48
1	11846134	11856752	RLOC_00003735	236	-	236.1	-204.3	0.459	0.909	62	100
1	11869789	11877555	RLOC_00003740	34	-	34.4	27.1	0.367	0.837	1247	1994
1	11881310	11886099	RLOC_00003742	22	+	22.1	-21.7	0.41	0.875	134	211
1	11920337	11923827	RLOC_00003751	15	-	14.9	7.7	0.621	1	238	314
1	11931148	11931801	RLOC_00003756	3	+	2.5	1.5	0.425	0.884	219	165
1	11931783	11934737	RLOC_00003757	24	-	23.6	-20.4	0.481	0.923	48	54
1	11955655	11957402	RLOC_00003764	7	+	7.3	1.4	1	1	630	1204
1	11966480	11968004	RLOC_00003769	6	+	5.6	3.3	0.273	0.758	304	607
1	11967782	11972669	RLOC_00003770	383	-	383.5	381.2	1	1	475	652
1	11975282	11978623	RLOC_00003771	19	-	19.4	1.0	0.875	1	102	138
1	11985649	11990520	RLOC_00003773	398	+	398.5	398.5	0.157	0.677	42	77
1	12002237	12003005	RLOC_00003776	11	-	11.0	10.3	0.497	0.935	68	108
1	12004852	12008880	RLOC_00003777	26	+	25.8	25.5	0.147	0.671	423	427
1	12010878	12012547	RLOC_00003778	7	+	6.9	6.3	2.75e-08	2.38e-06	706	1475
1	12023224	12024783	RLOC_00003781	2	+	2.3	2.3	1	1	2233	4531
1	12046378	12050095	RLOC_00003789	25	+	25.4	-24.5	0.242	0.734	163	248
1	12050712	12054811	RLOC_00003790	37	-	37.5	32.8	0.488	0.928	137	231
1	12057197	12059792	RLOC_00003793	9	-	9.3	-6.7	0.764	1	167	252
1	12066594	12068101	RLOC_00003795	19	+	19.5	8.3	1	1	150	244
1	12068035	12070455	RLOC_00003796	22	-	21.8	11.5	0.415	0.877	122	216
1	12074098	12076289	RLOC_00003798	15	+	15.1	0.6	0.0723	0.645	178	258
1	12084905	12088993	RLOC_00003802	204	+	204.2	188.6	0.166	0.681	112	176
1	12089815	12096055	RLOC_00003805	17	+	17.5	-9.9	0.875	1	146	185
1	12095805	12096495	RLOC_00003806	9	-	9.3	-8.0	0.807	1	69	108
1	12104688	12109535	RLOC_00003811	123	-	122.7	-119.3	0.673	1	43	62
1	12144433	12147247	RLOC_00003819	4	+	4.2	-2.8	0.823	1	371	584
1	12150666	12152460	RLOC_00003822	5	-	5.4	2.6	0.312	0.796	244	313
1	12157053	12159125	RLOC_00003825	4	-	3.6	2.4	0.86	1	192	241
1	12168767	12172119	RLOC_00003829	51	+	50.9	28.7	1	1	92	249
1	12177672	12179628	RLOC_00003832	1	+	1.4	-1.1	0.614	1	1298	2348
1	12180482	12184528	RLOC_00003833	63	+	62.7	59.3	0.0875	0.645	90	199
1	12188677	12190461	RLOC_00003836	39	+	39.2	-29.3	0.333	0.81	50	46
1	12203929	12208769	RLOC_00003842	9	+	8.9	-8.1	0.901	1	333	503
1	12208307	12214313	RLOC_00003843	83	-	82.7	63.7	0.61	1	79	99
1	12244559	12246231	RLOC_00003855	4	-	3.8	1.2	0.0508	0.645	816	1400
1	12261164	12262750	RLOC_00003858	5	+	5.4	-4.8	0.707	1	228	373
1	12264941	12266920	RLOC_00003859	8	+	7.7	-1.1	0.567	0.981	217	407
1	12267840	12269978	RLOC_00003860	9	+	9.3	9.3	0.32	0.801	721	829
1	12349290	12351318	RLOC_00003882	2	-	1.6	0.9	0.324	0.805	467	756
1	12351561	12355173	RLOC_00003883	10	+	10.3	-3.8	0.745	1	215	305
1	12355541	12359228	RLOC_00003884	8	+	7.8	-1.9	0.402	0.869	615	1154
1	12357697	12359014	RLOC_00003885	5	-	4.6	3.4	1	1	2112	2991
1	12359453	12361313	RLOC_00003886	31	-	30.6	30.5	0.0911	0.645	68	115
1	12366829	12370046	RLOC_00003889	36	+	36.3	19.4	0.606	1	121	216
1	12369953	12371547	RLOC_00003890	2	-	1.9	1.0	0.252	0.742	1188	2107
1	12396411	12401036	RLOC_00003903	67	-	66.9	6.3	0.639	1	177	245
1	12417011	12421792	RLOC_00003910	28	-	27.8	-11.9	0.89	1	98	151
1	12426690	12429742	RLOC_00003911	14	+	14.0	0.5	0.976	1	58	135
1	12429845	12433236	RLOC_00003912	8	+	7.9	0.5	0.952	1	121	249
1	12451428	12454692	RLOC_00003918	15	+	14.8	7.3	0.311	0.794	332	583
1	12455668	12457639	RLOC_00003919	45	+	45.3	4.4	0.0279	0.429	92	127
1	12458589	12463338	RLOC_00003920	47	+	46.9	43.8	0.43	0.888	138	229
1	12485314	12492207	RLOC_00003926	59	+	59.0	-49.9	0.807	1	98	171
1	12492320	12494589	RLOC_00003927	11	-	10.6	-0.4	0.782	1	41	82
1	12503359	12506177	RLOC_00003930	19	+	19.3	16.6	0.577	0.987	112	197
1	12513935	12517021	RLOC_00003933	150	-	149.6	-149.6	0.0748	0.645	79	146
1	12520058	12524395	RLOC_00003935	19	+	19.1	4.2	0.703	1	237	357
1	12534394	12536158	RLOC_00003938	9	+	9.3	5.2	0.72	1	112	259
1	12550338	12552674	RLOC_00003941	4	+	4.4	-4.0	0.204	0.707	212	298
1	12582129	12582822	RLOC_00003949	2	+	1.6	1.4	0.531	0.959	451	717
1	12584277	12590228	RLOC_00003950	55	-	54.8	24.4	0.092	0.645	492	730
1	12595109	12607157	RLOC_00003953	218	+	217.9	-214.9	0.314	0.797	110	181
1	12646650	12652646	RLOC_00003966	17	-	16.8	-13.3	0.834	1	150	286
1	12654926	12656605	RLOC_00003968	44	-	44.0	10.3	0.252	0.742	89	155
1	12685197	12688503	RLOC_00003975	76	+	75.6	-69.6	0.246	0.738	81	127
1	12686805	12688560	RLOC_00003976	11	-	10.9	1.5	0.172	0.682	363	353
1	12735999	12738879	RLOC_00003987	41	-	41.2	-41.2	0.261	0.745	183	237
1	12746404	12748636	RLOC_00003989	99	+	98.9	-81.1	0.0509	0.645	50	61
1	12748550	12750513	RLOC_00003990	11	-	10.9	-10.4	0.651	1	89	157
1	12851982	12853235	RLOC_00004036	7	+	6.8	5.9	0.305	0.788	196	234
1	12867080	12868890	RLOC_00004040	12	+	11.7	-11.5	4.44e-06	0.000227	777	1277
1	12890403	12892955	RLOC_00004048	14	+	13.7	13.6	0.346	0.821	170	393
1	12896581	12897675	RLOC_00004050	20	-	20.2	-3.0	0.935	1	34	39
1	12908847	12914858	RLOC_00004053	542	+	542.2	-537.6	0.0835	0.645	48	71
1	12958840	12962853	RLOC_00004068	225	-	224.5	163.0	0.196	0.7	57	106
1	12977667	12979948	RLOC_00004072	6	+	5.6	-1.5	0.686	1	494	722
1	12980688	12984820	RLOC_00004073	17	-	17.4	7.4	0.656	1	263	415
1	13026205	13027725	RLOC_00004088	5	+	4.9	-2.3	0.658	1	165	300
1	13030552	13031375	RLOC_00004090	5	-	5.4	-3.4	0.766	1	115	193
1	13039659	13042172	RLOC_00004094	18	+	18.3	-16.0	0.415	0.877	248	366
1	13051156	13055093	RLOC_00004098	32	-	31.8	-29.5	0.626	1	124	181
1	13071163	13074984	RLOC_00004103	106	+	106.2	-79.9	0.2	0.704	73	111
1	13077825	13080265	RLOC_00004105	36	+	36.0	-35.3	4.44e-06	0.000227	1306	1776
1	13115697	13117423	RLOC_00004114	23	-	23.2	10.4	0.137	0.664	101	158
1	13122081	13125328	RLOC_00004116	3	-	2.7	-1.1	0.767	1	1436	2478
1	13145598	13146870	RLOC_00004120	2	+	1.5	-0.1	0.998	1	355	497
1	13205344	13208289	RLOC_00004134	15	+	14.9	14.3	0.171	0.682	240	315
1	13208707	13210465	RLOC_00004135	2	+	1.9	-1.0	0.183	0.691	1906	3571
1	13225207	13227428	RLOC_00004140	3	+	3.1	2.8	0.602	1	950	2164
1	13277136	13280340	RLOC_00004149	11	-	10.6	-1.1	0.953	1	150	298
1	13450131	13453683	RLOC_00004181	28	+	27.7	16.9	0.212	0.713	245	377
1	13454495	13456336	RLOC_00004182	10	-	9.7	0.2	0.0501	0.645	298	368
1	13466675	13470936	RLOC_00004183	42	-	42.2	21.7	0.856	1	103	182
1	13533167	13544015	RLOC_00004200	56	+	55.7	-50.1	0.728	1	257	374
1	13640507	13643126	RLOC_00004216	36	+	36.1	32.2	0.125	0.66	91	186
1	13671781	13674242	RLOC_00004222	4	+	4.2	1.5	0.209	0.711	821	1421
1	13696001	13698739	RLOC_00004228	23	-	22.9	-22.9	1	1	1549	2669
1	13700764	13703654	RLOC_00004229	8	+	7.7	-4.1	0.856	1	309	478
1	13700772	13703572	RLOC_00004230	104	-	103.6	64.4	1	1	241	359
1	13898186	13900899	RLOC_00004279	4	-	3.5	-0.9	0.157	0.677	1724	2658
1	14003865	14005502	RLOC_00004305	24	+	24.3	8.4	1	1	75	106
1	14024633	14026951	RLOC_00004311	6	+	6.3	6.3	0.369	0.839	594	914
1	14158478	14161976	RLOC_00004342	4	+	3.7	-1.6	1	1	2905	6489
1	15603537	15607955	RLOC_00004514	112	-	112.2	111.1	1	1	117	150
1	15650526	15652542	RLOC_00004521	3	-	2.7	-1.7	1	1	1009	1877
1	15891280	15894640	RLOC_00004576	24	+	23.9	-23.0	0.33	0.807	92	158
1	15895196	15900105	RLOC_00004577	57	-	57.5	-45.2	0.445	0.897	112	188
1	15926226	15935489	RLOC_00004580	238	+	238.3	-201.7	0.368	0.838	76	89
1	15936155	15938994	RLOC_00004581	34	+	33.7	-14.8	0.42	0.881	116	239
1	16125685	16129890	RLOC_00004628	20	+	20.2	-18.6	0.123	0.66	9773	15965
1	16135629	16137550	RLOC_00004631	15	-	14.6	-13.2	0.0972	0.645	364	717
1	16228188	16231254	RLOC_00004646	74	-	74.0	-24.9	0.0799	0.645	85	160
1	16266552	16268945	RLOC_00004652	1	+	1.4	-0.4	0.905	1	1537	2750
1	16275036	16278726	RLOC_00004655	60	-	60.2	-60.2	0.0612	0.645	175	237
1	16397978	16399880	RLOC_00004677	44	-	44.2	34.8	5.93e-10	7.39e-08	357	851
1	16410371	16412736	RLOC_00004682	7	-	7.3	-6.8	0.234	0.729	319	378
1	16478141	16482880	RLOC_00004703	18	+	18.0	-11.6	0.766	1	182	286
1	16484211	16486327	RLOC_00004704	11	+	10.9	0.5	0.211	0.712	370	484
1	16486090	16488466	RLOC_00004705	9	-	8.5	8.4	1	1	403	705
1	16548416	16551909	RLOC_00004721	112	+	112.2	18.6	0.108	0.648	47	47
1	16575758	16576541	RLOC_00004728	4	+	4.1	1.1	0.822	1	76	125
1	16577520	16579722	RLOC_00004729	2	+	1.8	-0.3	0.871	1	716	1208
1	16616982	16622101	RLOC_00004738	37	+	37.3	19.3	0.314	0.797	192	295
1	16620768	16624504	RLOC_00004739	35	-	35.1	3.6	0.634	1	83	187
1	16637491	16645265	RLOC_00004743	732	-	732.2	731.4	1	1	160	222
1	16646690	16648692	RLOC_00004745	4	+	4.4	1.5	0.0592	0.645	734	1264
1	16654004	16656063	RLOC_00004748	21	+	21.0	-20.3	0.109	0.65	166	252
1	16655883	16657686	RLOC_00004749	32	-	31.9	25.6	1	1	75	222
1	16708003	16709713	RLOC_00004760	1	-	1.0	0.6	0.5	0.938	849	1284
1	16764371	16767704	RLOC_00004774	10	-	10.4	2.8	0.797	1	371	732
1	16796393	16800321	RLOC_00004782	10	-	10.1	2.9	0.762	1	223	366
1	16834209	16838562	RLOC_00004793	41	-	40.7	30.9	0.186	0.694	178	357
1	16848277	16851271	RLOC_00004796	5	-	5.1	5.1	1	1	1959	2690
1	16870220	16873427	RLOC_00004801	2	+	1.8	-1.5	1	1	5840	10195
1	16892526	16896167	RLOC_00004806	25	+	25.2	14.9	1	1	242	424
1	16896651	16898645	RLOC_00004807	7	-	6.9	0.6	0.635	1	308	387
1	16907536	16909572	RLOC_00004808	10	-	9.9	8.3	0.277	0.762	435	528
1	16912125	16913641	RLOC_00004810	4	-	3.5	2.8	0.945	1	246	462
1	16913993	16917053	RLOC_00004811	11	-	11.3	-1.5	0.589	0.992	321	582
1	16923439	16924821	RLOC_00004812	7	+	7.1	-6.8	1	1	333	488
1	16926296	16929196	RLOC_00004813	8	+	7.9	5.5	0.515	0.948	332	537
1	16939800	16942943	RLOC_00004815	21	+	21.1	4.1	0.687	1	135	221
1	16975627	16983038	RLOC_00004825	747	+	746.7	-729.6	1	1	57	93
1	16982796	16984515	RLOC_00004826	14	-	13.7	4.3	0.0545	0.645	398	497
1	16999533	17001871	RLOC_00004832	16	+	16.3	-13.2	0.579	0.988	135	278
1	17009072	17011953	RLOC_00004836	7	+	6.7	-1.7	0.559	0.976	340	565
1	17031210	17033316	RLOC_00004844	25	+	24.9	19.1	0.258	0.744	140	217
1	17055084	17059972	RLOC_00004851	221	+	220.6	211.7	0.321	0.801	47	77
1	17065104	17069286	RLOC_00004852	23	+	23.3	20.5	0.404	0.869	262	408
1	17074941	17076417	RLOC_00004854	3	-	3.5	2.8	1	1	1300	1555
1	17077385	17082592	RLOC_00004855	110	-	109.9	-101.3	0.221	0.719	89	146
1	17082876	17091405	RLOC_00004856	798	-	798.3	-783.9	0.00321	0.0661	428	704
1	17095979	17098041	RLOC_00004861	14	-	13.9	5.5	0.729	1	146	211
1	17123825	17129705	RLOC_00004865	22	+	21.7	6.8	0.205	0.708	827	2332
1	17152659	17155465	RLOC_00004876	157	+	156.6	68.8	0.00106	0.0252	69	93
1	17154845	17164792	RLOC_00004877	331	-	331.2	329.3	1	1	101	123
1	17165111	17167924	RLOC_00004884	32	-	31.9	28.2	0.25	0.742	184	261
1	17169462	17171559	RLOC_00004885	13	-	12.8	11.9	0.193	0.698	351	559
1	17172120	17177060	RLOC_00004886	44	-	44.3	37.8	0.65	1	128	138
1	17179264	17183064	RLOC_00004888	131	+	130.7	120.9	4.7e-08	3.8e-06	1079	867
1	17199313	17200841	RLOC_00004896	10	+	10.3	9.6	0.602	1	157	234
1	17252877	17253937	RLOC_00004906	10	+	9.5	5.4	0.909	1	100	186
1	17265585	17266824	RLOC_00004909	50	-	50.3	-11.7	0.0978	0.645	91	64
1	17275889	17277839	RLOC_00004913	5	-	5.3	-3.5	0.343	0.818	112	157
1	17282748	17285749	RLOC_00004915	3	-	2.8	-0.9	0.0955	0.645	4572	6976
1	17295569	17296326	RLOC_00004917	10	+	9.7	-9.7	0.00847	0.153	139	251
1	17297708	17298832	RLOC_00004919	3	-	3.5	1.5	0.0875	0.645	539	938
1	17308734	17311467	RLOC_00004923	20	-	19.7	11.2	0.787	1	55	127
1	17319118	17321202	RLOC_00004928	15	+	15.0	-1.7	0.0983	0.645	258	533
1	17319550	17323484	RLOC_00004929	8	-	7.8	4.0	0.203	0.707	412	722
1	17330818	17332336	RLOC_00004933	10	+	9.8	-9.0	0.118	0.658	327	606
1	17335750	17339290	RLOC_00004935	57	+	57.2	35.3	0.386	0.855	100	131
1	17341737	17344836	RLOC_00004937	24	+	24.4	-22.9	0.18	0.688	187	300
1	17372370	17376091	RLOC_00004947	105	-	104.8	-103.3	0.104	0.645	64	123
1	17394071	17395673	RLOC_00004957	27	+	26.5	25.7	0.437	0.893	72	80
1	17395498	17397307	RLOC_00004958	5	-	4.7	-4.7	1	1	1318	1991
1	17424472	17427475	RLOC_00004969	4	+	3.9	-3.9	0.391	0.858	405	612
1	17443178	17446763	RLOC_00004975	68	+	67.9	13.3	0.128	0.66	54	77
1	17451516	17454461	RLOC_00004976	26	+	26.1	4.7	1	1	356	486
1	17477578	17483502	RLOC_00004982	92	+	91.6	-52.1	0.861	1	91	162
1	17484283	17486585	RLOC_00004984	31	+	31.4	31.4	1	1	174	256
1	17491730	17494779	RLOC_00004987	26	+	26.1	23.5	1	1	98	318
1	17518046	17520129	RLOC_00004996	9	-	9.4	-4.4	0.592	0.994	170	337
1	17536620	17539719	RLOC_00005001	75	-	74.8	-74.4	0.15	0.671	83	111
1	17557090	17560331	RLOC_00005007	9	+	8.8	8.4	0.852	1	249	568
1	17560928	17562940	RLOC_00005008	9	-	8.7	-1.7	0.637	1	195	629
1	17566566	17570516	RLOC_00005010	54	+	53.7	13.3	0.419	0.881	154	207
1	17569255	17570249	RLOC_00005011	2	-	2.2	0.8	0.779	1	99	121
1	17611904	17612613	RLOC_00005029	3	+	2.9	0.4	0.687	1	119	206
1	17613013	17614984	RLOC_00005030	16	-	16.0	-6.1	0.0925	0.645	318	481
1	17647143	17651791	RLOC_00005037	39	-	39.2	-39.1	0.593	0.995	89	137
1	17675364	17683629	RLOC_00005044	36	-	36.2	22.8	0.381	0.85	217	356
1	17686989	17688859	RLOC_00005045	6	+	6.0	-4.1	0.66	1	210	315
1	17716151	17721891	RLOC_00005052	99	-	99.1	28.2	0.213	0.713	251	393
1	17769883	17773524	RLOC_00005062	88	-	88.2	70.8	0.084	0.645	115	210
1	17773607	17780107	RLOC_00005063	291	-	290.5	289.6	0.246	0.738	49	92
1	17781987	17784211	RLOC_00005065	24	+	24.2	17.7	0.228	0.726	117	231
1	17786495	17789282	RLOC_00005068	7	-	7.3	1.5	0.917	1	205	369
1	17788768	17792404	RLOC_00005069	368	+	368.4	365.8	1	1	182	205
1	17796151	17798335	RLOC_00005072	33	-	33.3	31.4	0.055	0.645	139	231
1	17798430	17802330	RLOC_00005074	27	+	26.7	18.9	0.727	1	95	206
1	17805760	17808993	RLOC_00005076	21	+	21.1	14.1	0.393	0.86	211	302
1	17808987	17812106	RLOC_00005077	40	-	40.1	-38.4	0.353	0.826	144	199
1	17847032	17848898	RLOC_00005086	4	+	4.4	4.4	1	1	750	2145
1	17847623	17853915	RLOC_00005087	102	-	101.7	99.5	0.317	0.8	57	100
1	17854811	17855959	RLOC_00005089	2	-	2.3	-2.1	0.523	0.954	416	574
1	17863659	17864558	RLOC_00005091	4	+	4.4	0.6	0.702	1	123	215
1	17867101	17868452	RLOC_00005093	2	+	1.9	1.2	0.0802	0.645	1111	2166
1	17874442	17877524	RLOC_00005096	71	+	70.8	-63.4	0.133	0.664	71	130
1	17877410	17881310	RLOC_00005097	91	-	91.4	-90.5	0.16	0.677	153	232
1	17886035	17892632	RLOC_00005100	19	-	19.3	14.7	0.499	0.937	562	788
1	17895783	17898813	RLOC_00005101	7	-	6.7	-2.9	0.456	0.907	730	1371
1	17902620	17906873	RLOC_00005103	40	-	40.1	-16.0	0.651	1	112	198
1	17906870	17908534	RLOC_00005104	3	+	2.9	0.5	0.888	1	749	1442
1	17908452	17910523	RLOC_00005105	3	-	3.2	0.6	0.251	0.742	741	1207
1	17910778	17913636	RLOC_00005106	42	+	41.9	-41.6	0.101	0.645	144	211
1	17917950	17921225	RLOC_00005108	27	+	26.8	-3.8	0.314	0.797	104	148
1	17940049	17942867	RLOC_00005112	7	+	7.3	5.5	0.961	1	258	373
1	17949611	17952709	RLOC_00005115	54	-	53.9	4.8	0.425	0.884	81	78
1	17953869	17957719	RLOC_00005117	12	-	12.4	5.6	0.88	1	102	210
1	17965870	17970608	RLOC_00005123	31	+	30.5	26.3	1	1	520	1021
1	17970610	17973402	RLOC_00005125	51	-	50.8	49.0	0.145	0.671	113	189
1	17973641	17976663	RLOC_00005126	8	-	8.2	-5.1	0.08	0.645	544	648
1	17981635	17983377	RLOC_00005128	9	-	8.6	8.5	0.265	0.75	90	271
1	17983533	17989163	RLOC_00005129	42	+	41.6	-34.8	0.88	1	140	205
1	18030705	18031608	RLOC_00005142	4	+	3.6	1.2	0.758	1	165	215
1	18035854	18039399	RLOC_00005144	5	+	4.8	3.8	0.222	0.719	678	1113
1	18035966	18039405	RLOC_00005145	29	-	29.2	-21.7	0.131	0.66	136	179
1	18040128	18042991	RLOC_00005146	81	+	80.6	-79.4	0.339	0.815	71	79
1	18043671	18047806	RLOC_00005147	25	-	25.2	-7.2	0.14	0.666	383	677
1	18059449	18061302	RLOC_00005151	5	-	4.6	1.3	1	1	1470	2940
1	18061355	18065051	RLOC_00005152	90	+	89.8	-89.0	0.0596	0.645	108	142
1	18064882	18068163	RLOC_00005153	17	-	17.2	-14.8	0.802	1	185	297
1	18068664	18071648	RLOC_00005154	10	-	9.9	6.0	0.434	0.891	333	613
1	18098094	18101767	RLOC_00005162	4	+	3.8	0.1	0.237	0.732	2157	4012
1	18101641	18104783	RLOC_00005163	65	-	65.3	-65.2	0.365	0.835	71	91
1	18106238	18110396	RLOC_00005165	50	+	49.5	-27.0	0.533	0.959	111	144
1	18112361	18117662	RLOC_00005167	420	-	419.9	399.5	0.00105	0.0251	76	112
1	18132544	18134017	RLOC_00005175	6	+	6.0	-5.6	0.326	0.805	258	274
1	18136665	18139060	RLOC_00005178	33	+	32.8	30.9	4.16e-05	0.00154	740	1242
1	18174372	18176389	RLOC_00005188	22	-	21.6	12.6	0.737	1	91	153
1	18176622	18182510	RLOC_00005189	30	-	30.4	-24.5	0.172	0.682	598	1115
1	18183047	18187566	RLOC_00005191	88	-	87.8	87.7	0.308	0.791	219	277
1	18198110	18200366	RLOC_00005194	17	+	16.7	14.3	1	1	105	90
1	18215799	18219269	RLOC_00005200	23	+	23.4	23.3	1	1	1887	2574
1	18234678	18237543	RLOC_00005207	19	+	18.7	-18.6	0.103	0.645	202	360
1	18237646	18238475	RLOC_00005208	39	-	38.6	-38.6	1	1	133	229
1	18251989	18264672	RLOC_00005211	80	+	79.9	56.4	0.593	0.995	195	337
1	18276642	18279532	RLOC_00005219	6	+	6.0	3.5	0.835	1	187	293
1	18282902	18285365	RLOC_00005221	18	+	18.3	-12.1	1	1	212	339
1	18283998	18286965	RLOC_00005222	42	-	42.4	34.6	1	1	457	658
1	18290941	18295905	RLOC_00005224	94	+	94.2	66.4	0.498	0.936	62	106
1	18310427	18311714	RLOC_00005229	3	+	2.9	-2.9	0.239	0.732	284	483
1	18314099	18316861	RLOC_00005231	13	-	12.9	-4.2	0.588	0.991	311	393
1	18320461	18322818	RLOC_00005234	2	-	2.0	0.6	0.507	0.943	3451	4303
1	18326824	18328765	RLOC_00005235	12	+	12.0	8.6	0.166	0.681	125	179
1	18329665	18333765	RLOC_00005236	325	+	324.9	307.0	1	1	57	100
1	18333187	18337520	RLOC_00005237	4	-	3.5	0.4	0.795	1	70	92
1	18351323	18354634	RLOC_00005242	27	+	26.8	1.9	0.922	1	58	101
1	18354743	18356988	RLOC_00005243	11	+	10.8	-4.9	0.26	0.745	205	321
1	18355996	18360447	RLOC_00005244	17	-	16.7	-10.8	0.316	0.8	427	576
1	18365335	18366744	RLOC_00005247	105	-	104.6	98.9	0.107	0.648	17	26
1	18367589	18375494	RLOC_00005248	195	-	194.7	98.4	0.718	1	54	79
1	18377059	18379998	RLOC_00005250	97	-	96.7	95.0	1	1	367	706
1	18380362	18386149	RLOC_00005251	137	-	137.1	129.4	0.0586	0.645	118	223
1	18391174	18394008	RLOC_00005255	13	-	12.7	-5.2	0.689	1	182	279
1	18400002	18402628	RLOC_00005258	14	+	14.1	-12.7	0.751	1	129	360
1	18402121	18405620	RLOC_00005260	17	-	17.1	-9.8	0.858	1	157	271
1	18407399	18410022	RLOC_00005261	51	+	50.5	-45.5	0.178	0.686	52	79
1	18409653	18413040	RLOC_00005262	9	-	8.6	-4.6	0.42	0.881	559	1017
1	18416473	18420111	RLOC_00005263	6	+	6.5	-4.8	0.886	1	226	342
1	18428787	18430497	RLOC_00005266	4	-	4.1	1.0	0.246	0.738	168	190
1	18454843	18456619	RLOC_00005275	12	-	11.5	-4.6	0.383	0.852	206	245
1	18470057	18473848	RLOC_00005279	19	+	19.5	-18.8	0.884	1	113	139
1	18494064	18497318	RLOC_00005286	27	-	27.4	23.3	0.329	0.807	171	303
1	18500027	18504691	RLOC_00005288	8	-	8.1	1.1	0.109	0.65	1679	1978
1	18504805	18506270	RLOC_00005289	70	+	69.5	69.4	3.6e-08	2.99e-06	458	487
1	18507921	18513340	RLOC_00005290	48	+	47.7	44.4	0.442	0.896	129	284
1	18517556	18520624	RLOC_00005293	4	+	4.0	-2.0	9.83e-05	0.00324	2734	4177
1	18519075	18521913	RLOC_00005295	5	-	5.4	-1.0	1	1	1412	1669
1	18522247	18539995	RLOC_00005296	365	-	365.4	-305.3	0.654	1	106	170
1	18561801	18566427	RLOC_00005306	104	+	103.9	45.6	0.465	0.912	45	65
1	18569500	18579175	RLOC_00005308	280	-	279.7	-199.9	0.242	0.734	106	131
1	18581997	18587256	RLOC_00005310	31	+	30.5	19.9	0.533	0.959	338	448
1	18591154	18598523	RLOC_00005312	26	-	25.6	-25.4	0.253	0.742	814	1183
1	18614200	18617155	RLOC_00005316	18	-	17.9	-17.9	1.3e-13	3.24e-11	1192	1611
1	18617532	18626441	RLOC_00005317	748	-	747.9	739.1	0.167	0.681	55	71
1	18627410	18632039	RLOC_00005319	32	-	32.5	-31.7	0.775	1	256	425
1	18637662	18639544	RLOC_00005322	6	-	5.8	-4.8	3.85e-05	0.00144	968	812
1	18658507	18662052	RLOC_00005330	21	+	21.1	-17.4	0.181	0.689	294	404
1	18662265	18666515	RLOC_00005331	78	+	78.3	-75.3	0.299	0.782	91	107
1	18672131	18677712	RLOC_00005334	22	+	22.0	-7.4	0.955	1	126	198
1	18677693	18680300	RLOC_00005335	10	-	10.4	-6.9	0.892	1	171	212
1	18681912	18685968	RLOC_00005336	10	-	9.9	5.2	0.177	0.686	389	777
1	18685292	18687907	RLOC_00005337	9	+	9.0	9.0	0.458	0.909	352	673
1	18687784	18690503	RLOC_00005339	14	-	14.1	-14.0	0.704	1	117	201
1	18693649	18697713	RLOC_00005341	156	+	156.4	-155.1	0.193	0.698	67	134
1	18701881	18704943	RLOC_00005343	5	+	5.2	3.4	0.302	0.786	1127	2434
1	18704163	18706589	RLOC_00005344	23	-	22.8	21.8	1	1	142	270
1	18707888	18716118	RLOC_00005345	178	-	177.6	-177.5	0.298	0.782	112	203
1	18716122	18721285	RLOC_00005346	283	+	283.1	281.7	1	1	123	243
1	18724143	18728400	RLOC_00005349	23	-	23.4	-10.7	0.286	0.772	258	386
1	18728633	18730498	RLOC_00005352	7	-	7.4	-1.7	0.163	0.677	108	206
1	18732192	18734199	RLOC_00005354	7	-	7.0	-0.6	0.933	1	26	31
1	18737062	18739649	RLOC_00005355	24	-	23.9	-2.4	0.196	0.7	281	322
1	18748249	18751460	RLOC_00005357	38	+	37.5	32.5	0.707	1	90	106
1	18750986	18753697	RLOC_00005358	24	-	23.7	-23.1	0.366	0.837	69	144
1	18756223	18758595	RLOC_00005360	25	-	25.1	24.2	0.135	0.664	104	164
1	18770936	18774759	RLOC_00005363	25	+	25.1	-25.1	0.269	0.754	234	348
1	18774768	18777069	RLOC_00005365	14	-	14.3	11.1	0.437	0.893	192	290
1	18784461	18787824	RLOC_00005370	39	-	38.5	-23.3	0.223	0.72	113	238
1	18795187	18802375	RLOC_00005373	1441	+	1441.3	-1440.4	0.000635	0.0162	130	192
1	18802551	18803755	RLOC_00005374	18	+	17.7	17.5	0.000111	0.00361	171	248
1	18807683	18815537	RLOC_00005376	1034	+	1033.6	1022.6	5.38e-06	0.000269	218	237
1	18839046	18844595	RLOC_00005386	72	+	71.9	65.2	1	1	118	190
1	18866142	18867533	RLOC_00005392	12	+	11.9	10.3	0.515	0.948	146	317
1	18870058	18872974	RLOC_00005395	3	+	2.7	-1.6	0.755	1	561	1014
1	18877796	18880001	RLOC_00005397	24	-	23.7	-10.1	0.141	0.666	156	293
1	18926887	18931045	RLOC_00005413	75	+	74.8	-74.7	0.00272	0.0574	1314	3015
1	18934278	18937717	RLOC_00005417	148	+	147.6	-146.8	1	1	841	1452
1	18943446	18945812	RLOC_00005420	10	-	9.5	8.5	0.851	1	51	121
1	18949531	18951891	RLOC_00005422	5	+	5.2	5.0	1	1	371	612
1	18984280	18986653	RLOC_00005429	12	+	12.3	-11.2	2.39e-14	7.18e-12	4512	6546
1	19018925	19021807	RLOC_00005439	17	-	17.1	-0.5	0.682	1	149	196
1	19030997	19035121	RLOC_00005442	35	+	34.6	-32.1	0.526	0.956	99	169
1	19035643	19039398	RLOC_00005443	42	+	42.2	-38.4	0.149	0.671	111	173
1	19044160	19047518	RLOC_00005445	154	+	153.7	153.5	0.382	0.852	79	109
1	19047835	19053535	RLOC_00005446	278	+	277.8	34.3	1	1	131	173
1	19051673	19053731	RLOC_00005447	3	-	2.7	2.6	4.05e-17	1.58e-14	11895	18305
1	19057471	19061714	RLOC_00005448	212	+	211.6	-179.8	0.215	0.715	25	29
1	19068240	19069855	RLOC_00005450	20	+	20.1	-15.2	1	1	196	295
1	19087383	19090523	RLOC_00005454	16	+	15.8	-0.0	0.832	1	84	230
1	19097711	19101265	RLOC_00005457	18	-	17.7	9.2	1	1	746	1109
1	19102790	19104933	RLOC_00005458	4	-	4.2	-3.6	0.443	0.896	364	680
1	19115550	19117554	RLOC_00005462	6	+	6.1	-5.8	0.895	1	126	223
1	19117031	19119382	RLOC_00005463	25	-	25.4	-2.9	0.187	0.694	100	162
1	19119593	19122038	RLOC_00005465	13	-	13.3	12.0	0.691	1	196	313
1	19122053	19126709	RLOC_00005466	7	-	6.8	0.1	0.641	1	620	915
1	19128055	19132335	RLOC_00005468	95	-	94.8	85.4	0.0721	0.645	102	174
1	19132295	19135840	RLOC_00005470	20	+	19.9	-17.3	0.887	1	118	161
1	19136213	19139989	RLOC_00005471	24	+	23.8	14.4	0.791	1	141	263
1	19141259	19144323	RLOC_00005473	21	-	21.3	21.1	1	1	424	821
1	19152507	19154051	RLOC_00005476	2	+	2.3	2.3	1	1	1061	2480
1	19158722	19161729	RLOC_00005478	15	-	14.6	-14.1	1	1	431	684
1	19163842	19170458	RLOC_00005479	55	+	54.6	20.3	0.526	0.956	226	473
1	19173879	19175228	RLOC_00005481	5	+	5.3	0.7	0.437	0.893	225	289
1	19180757	19186549	RLOC_00005483	112	+	112.3	90.1	0.256	0.744	126	155
1	19186397	19188795	RLOC_00005484	24	-	24.4	23.3	1	1	333	624
1	19191465	19194908	RLOC_00005486	26	+	26.4	-20.4	0.887	1	109	131
1	19199332	19201707	RLOC_00005488	19	+	19.5	18.7	0.0589	0.645	294	626
1	19220235	19225797	RLOC_00005494	73	-	72.9	-72.2	1	1	374	584
1	19242653	19250863	RLOC_00005499	394	-	393.7	-386.4	0.186	0.694	74	98
1	19295819	19299171	RLOC_00005511	8	-	7.9	-0.5	0.736	1	370	618
1	19305080	19307518	RLOC_00005513	11	+	11.1	6.0	0.606	1	384	506
1	19311094	19314193	RLOC_00005515	182	-	181.7	181.7	1	1	54	112
1	19323054	19326918	RLOC_00005517	9	-	8.7	5.1	0.461	0.909	524	1029
1	19333046	19336129	RLOC_00005519	22	-	22.4	1.1	0.123	0.66	298	1224
1	19358799	19360822	RLOC_00005526	14	-	13.8	-8.6	0.948	1	61	90
1	19369088	19372132	RLOC_00005528	29	+	28.9	17.1	0.684	1	108	191
1	19383077	19385602	RLOC_00005533	103	-	103.4	-101.4	0.000956	0.0231	280	579
1	19407258	19408319	RLOC_00005537	10	-	10.3	8.8	0.435	0.891	69	108
1	19434488	19439078	RLOC_00005546	65	+	64.6	-64.5	1	1	380	438
1	19439366	19443627	RLOC_00005547	16	-	16.4	-15.7	1	1	851	1138
1	19453379	19454704	RLOC_00005550	4	-	4.3	-4.2	5.53e-19	2.7e-16	4746	9388
1	19454798	19456499	RLOC_00005551	5	+	4.6	2.9	1	1	18279	29920
1	19458611	19459763	RLOC_00005553	27	-	27.2	-23.8	0.701	1	39	51
1	19460481	19463481	RLOC_00005554	71	+	70.7	-63.9	0.157	0.677	49	84
1	19467930	19472568	RLOC_00005556	232	-	232.5	172.2	0.0131	0.227	203	414
1	19474774	19476239	RLOC_00005557	12	-	12.1	5.9	0.000148	0.00458	457	857
1	19478052	19482875	RLOC_00005558	45	+	45.1	28.9	0.338	0.815	281	533
1	19484277	19487997	RLOC_00005559	20	+	19.8	-18.7	0.46	0.909	160	243
1	19489788	19493069	RLOC_00005562	423	-	423.0	421.7	1	1	432	594
1	19496460	19497720	RLOC_00005566	12	+	12.4	12.4	1	1	114	146
1	19499145	19506309	RLOC_00005568	124	+	123.5	-21.1	0.186	0.694	152	296
1	19506355	19508935	RLOC_00005569	50	+	49.9	-49.2	0.115	0.655	91	147
1	19508937	19511641	RLOC_00005570	24	+	24.5	-19.2	0.611	1	119	226
1	19514722	19518411	RLOC_00005572	14	+	14.4	13.1	0.183	0.691	359	1073
1	19520602	19525693	RLOC_00005573	42	+	41.5	38.1	0.196	0.7	235	842
1	19527821	19531443	RLOC_00005575	12	+	12.1	-4.8	0.771	1	338	613
1	19559799	19565274	RLOC_00005583	11	-	10.7	9.1	0.231	0.728	1073	1558
1	19565600	19568391	RLOC_00005586	48	+	48.3	46.9	0.249	0.741	51	71
1	19570047	19572204	RLOC_00005589	9	-	8.6	-2.7	0.979	1	123	173
1	19572731	19574057	RLOC_00005590	33	-	33.5	33.4	1	1	126	180
1	19579629	19580856	RLOC_00005592	10	-	10.0	9.5	0.233	0.728	107	126
1	19588996	19590288	RLOC_00005596	7	-	7.1	-5.6	0.704	1	152	272
1	19590432	19592755	RLOC_00005597	12	+	11.9	11.2	1	1	278	523
1	19614930	19617611	RLOC_00005611	36	-	36.1	-28.1	0.317	0.8	64	88
1	19640524	19641665	RLOC_00005618	5	+	4.7	4.6	1	1	438	732
1	19642465	19646561	RLOC_00005619	9	+	9.0	-3.9	0.693	1	1206	1881
1	19651171	19652825	RLOC_00005621	5	+	4.7	0.3	0.125	0.66	547	1017
1	19658600	19663488	RLOC_00005623	25	+	24.5	-9.8	0.692	1	202	278
1	19669007	19671952	RLOC_00005628	78	-	78.1	76.2	0.0502	0.645	495	658
1	19685544	19688028	RLOC_00005635	15	+	14.8	-12.7	1	1	463	616
1	19696922	19698482	RLOC_00005637	52	-	52.1	-15.0	1	1	65	144
1	19708006	19709399	RLOC_00005641	13	+	13.3	4.0	0.0671	0.645	90	143
1	19711178	19713308	RLOC_00005644	7	+	7.0	6.8	0.381	0.85	203	333
1	19716401	19723725	RLOC_00005645	112	+	112.4	19.5	0.764	1	94	92
1	19737414	19740368	RLOC_00005651	29	+	28.8	-27.8	0.203	0.707	214	303
1	19744947	19747287	RLOC_00005653	28	-	27.6	26.3	0.256	0.744	153	324
1	19760000	19761496	RLOC_00005658	15	-	14.9	-4.3	0.846	1	83	102
1	19771915	19775818	RLOC_00005661	53	+	52.9	-52.4	0.554	0.973	105	208
1	19778132	19779447	RLOC_00005663	14	+	13.7	-4.0	0.905	1	37	89
1	19783343	19787363	RLOC_00005665	69	+	69.0	30.5	0.468	0.915	106	116
1	19806262	19807705	RLOC_00005673	22	+	22.1	-20.2	0.0997	0.645	119	154
1	19820564	19822262	RLOC_00005677	11	-	10.6	8.6	0.532	0.959	121	243
1	19831351	19833028	RLOC_00005678	2	+	1.7	-1.3	0.568	0.981	124	206
1	19837109	19840370	RLOC_00005679	58	+	58.4	-55.2	0.305	0.788	80	128
1	19844449	19847856	RLOC_00005681	9	+	9.5	-0.7	0.731	1	293	522
1	19849691	19851934	RLOC_00005683	7	-	6.5	-4.7	0.453	0.903	166	301
1	19854560	19857138	RLOC_00005685	5	-	4.8	-2.6	0.591	0.994	741	1463
1	19857303	19859273	RLOC_00005686	11	+	10.6	-6.8	0.886	1	75	88
1	19864694	19867389	RLOC_00005690	4	-	4.0	0.3	1	1	261	532
1	19871115	19873804	RLOC_00005693	76	+	76.3	76.3	1.57e-05	0.000674	165	160
1	19879430	19882975	RLOC_00005694	35	+	35.2	-25.6	0.108	0.649	115	195
1	19883919	19888413	RLOC_00005695	3	-	2.8	-2.4	0.646	1	1621	3341
1	19890934	19893504	RLOC_00005696	7	-	6.8	-6.7	0.183	0.692	450	960
1	19902501	19907114	RLOC_00005700	515	+	514.6	145.7	0.0325	0.486	62	99
1	19912960	19916686	RLOC_00005704	46	-	46.1	-22.2	0.948	1	51	78
1	19917993	19923936	RLOC_00005705	22	+	22.3	13.9	0.894	1	239	433
1	19924666	19926713	RLOC_00005706	6	+	5.9	0.7	0.907	1	260	373
1	19934986	19941212	RLOC_00005710	63	+	63.0	-50.6	0.584	0.988	157	342
1	19945810	19951729	RLOC_00005711	76	+	76.0	72.4	0.124	0.66	287	529
1	19947629	19956804	RLOC_00005712	779	-	778.9	-667.1	3.52e-05	0.00136	197	271
1	19966923	19969757	RLOC_00005717	72	-	72.0	-72.0	0.0128	0.222	322	554
1	19970559	19975337	RLOC_00005719	82	-	81.9	-77.4	1	1	374	399
1	19976354	19978048	RLOC_00005720	2	-	1.7	0.4	0.213	0.713	335	624
1	19978100	19980125	RLOC_00005721	35	+	35.3	-25.7	0.177	0.686	86	135
1	19981373	19982307	RLOC_00005723	36	+	36.1	36.0	0.262	0.747	79	149
1	19984541	19986112	RLOC_00005727	2	-	2.2	-1.4	0.607	1	636	994
1	19987109	19991214	RLOC_00005728	15	+	14.9	0.5	0.449	0.9	370	533
1	19991270	19993458	RLOC_00005729	3	-	3.1	-2.6	0.0944	0.645	1319	2091
1	19996204	20000782	RLOC_00005730	30	+	29.7	6.6	0.72	1	91	120
1	20006518	20006992	RLOC_00005733	2	-	2.5	-2.3	0.348	0.822	509	691
1	20016220	20017932	RLOC_00005739	12	-	12.0	9.2	0.749	1	31	46
1	20026015	20028756	RLOC_00005744	29	-	29.5	-27.4	0.244	0.737	107	112
1	20028895	20031596	RLOC_00005745	26	-	25.9	-3.6	0.531	0.959	75	140
1	20036565	20039301	RLOC_00005748	12	+	12.2	12.2	0.402	0.869	371	605
1	20052415	20056387	RLOC_00005753	59	-	59.5	-57.4	0.52	0.951	86	135
1	20056525	20059803	RLOC_00005754	112	+	111.5	102.3	1	1	64	92
1	20061404	20065713	RLOC_00005755	11	+	10.8	-6.7	0.588	0.992	581	794
1	20065393	20068500	RLOC_00005756	24	-	23.7	23.0	0.12	0.66	341	674
1	20068964	20071171	RLOC_00005757	17	-	16.6	-16.6	0.356	0.828	139	233
1	20071177	20073804	RLOC_00005758	29	-	29.2	-28.5	0.172	0.683	140	241
1	20073972	20079022	RLOC_00005759	692	-	692.2	-692.0	4.96e-05	0.0018	428	578
1	20081643	20084551	RLOC_00005761	10	+	10.3	-6.3	0.886	1	151	231
1	20101298	20103690	RLOC_00005768	7	+	7.4	-5.4	0.228	0.726	477	796
1	20103755	20106077	RLOC_00005769	7	-	7.5	7.4	0.535	0.96	231	402
1	20134843	20137013	RLOC_00005779	1	+	1.4	-0.7	0.433	0.89	1852	2683
1	20154153	20156520	RLOC_00005789	18	-	18.3	-15.1	0.177	0.686	207	530
1	20158554	20160872	RLOC_00005790	12	-	11.8	11.0	0.0852	0.645	637	1926
1	20167593	20169762	RLOC_00005792	2	+	2.2	-0.1	0.891	1	543	1140
1	20169738	20173949	RLOC_00005793	187	-	187.2	-173.4	0.0683	0.645	66	282
1	20180609	20182374	RLOC_00005795	5	+	4.6	1.8	0.621	1	367	472
1	20183544	20187096	RLOC_00005797	19	-	19.1	-19.1	1	1	663	941
1	20194711	20199193	RLOC_00005800	13	-	12.6	-11.7	0.376	0.845	426	662
1	20201797	20204431	RLOC_00005802	28	+	27.6	-27.3	0.139	0.664	186	246
1	20210800	20214041	RLOC_00005804	2	+	2.5	0.3	0.941	1	512	864
1	20213888	20215277	RLOC_00005805	10	-	10.1	2.9	0.871	1	78	142
1	20215432	20218699	RLOC_00005806	114	+	114.4	113.8	1	1	97	157
1	20221004	20226055	RLOC_00005808	113	-	113.3	-113.3	0.0214	0.34	144	227
1	20235691	20237620	RLOC_00005811	52	+	52.0	51.7	0.275	0.76	41	66
1	20241225	20242665	RLOC_00005812	9	+	9.5	8.5	0.119	0.66	205	312
1	20246025	20250356	RLOC_00005815	28	-	28.3	6.1	0.863	1	69	156
1	20256916	20262279	RLOC_00005819	52	+	51.9	49.3	0.263	0.748	653	1116
1	20268473	20270140	RLOC_00005822	10	-	10.1	-3.5	0.192	0.698	340	440
1	20275533	20277981	RLOC_00005825	9	-	9.4	-9.3	0.235	0.73	488	796
1	20283416	20293355	RLOC_00005827	387	+	386.6	-306.4	1	1	684	990
1	20293138	20297257	RLOC_00005830	26	-	26.4	-20.4	0.411	0.875	204	283
1	20301071	20303949	RLOC_00005833	51	-	50.5	0.3	0.284	0.768	70	113
1	20304514	20307110	RLOC_00005834	39	-	39.0	-23.6	0.283	0.767	89	135
1	20309472	20310850	RLOC_00005836	3	-	2.8	-2.7	3.75e-08	3.07e-06	8317	14740
1	20322963	20328238	RLOC_00005840	541	+	540.7	-536.2	0.0207	0.33	71	91
1	20340561	20343547	RLOC_00005843	7	-	6.8	-1.3	0.98	1	210	343
1	20350122	20358026	RLOC_00005846	53	+	52.9	16.8	0.795	1	189	278
1	20356953	20357879	RLOC_00005847	1	-	1.4	1.2	0.415	0.877	701	993
1	20358237	20362593	RLOC_00005848	108	-	107.6	96.9	0.351	0.824	75	143
1	20363302	20366140	RLOC_00005849	4	+	3.6	-2.4	0.902	1	492	820
1	20389346	20391147	RLOC_00005856	4	+	4.2	0.1	0.0535	0.645	974	1987
1	20401356	20403166	RLOC_00005861	3	-	3.0	-2.9	0.307	0.791	848	1550
1	20408093	20411692	RLOC_00005864	49	-	49.2	34.6	0.598	0.998	106	188
1	20414315	20415287	RLOC_00005868	4	-	3.5	-2.4	0.0593	0.645	437	912
1	20416657	20421156	RLOC_00005871	148	-	147.8	146.8	0.252	0.742	34	76
1	20424331	20430220	RLOC_00005874	861	+	860.6	-832.9	1	1	55	74
1	20430601	20432031	RLOC_00005875	12	+	11.9	9.5	0.126	0.66	239	309
1	20433846	20437349	RLOC_00005877	97	+	97.3	-77.9	1	1	175	299
1	20439369	20445022	RLOC_00005879	124	+	124.2	119.3	9.54e-15	3.02e-12	3668	3264
1	20447156	20450963	RLOC_00005881	15	+	14.7	8.1	0.745	1	294	426
1	20451082	20452699	RLOC_00005882	7	+	7.3	5.0	0.0204	0.326	230	355
1	20454361	20456224	RLOC_00005885	17	+	17.3	-3.0	0.563	0.978	76	122
1	20470677	20475202	RLOC_00005890	30	+	29.8	-26.3	0.801	1	140	252
1	20504928	20506538	RLOC_00005903	17	+	16.7	-6.7	0.519	0.95	56	89
1	20511330	20513691	RLOC_00005906	9	+	8.6	3.9	0.847	1	147	284
1	20514625	20516551	RLOC_00005907	6	+	6.1	-2.8	0.669	1	343	461
1	20525635	20530468	RLOC_00005909	32	+	31.7	-26.0	0.196	0.7	229	437
1	20534867	20539189	RLOC_00005912	154	+	153.8	-112.9	0.792	1	21	37
1	20554360	20558628	RLOC_00005917	15	+	14.7	6.2	0.922	1	195	300
1	20560196	20563581	RLOC_00005919	42	-	41.5	23.9	0.321	0.801	149	158
1	20574473	20577351	RLOC_00005923	12	+	12.0	-7.9	0.982	1	120	231
1	20577376	20580010	RLOC_00005925	11	+	11.2	-11.0	0.223	0.72	291	511
1	20580285	20588304	RLOC_00005926	462	+	462.5	420.7	0.176	0.686	85	190
1	20588355	20589251	RLOC_00005930	1	+	1.4	0.2	0.968	1	234	453
1	20597711	20598747	RLOC_00005933	6	-	6.0	2.7	0.395	0.862	133	393
1	20607014	20612723	RLOC_00005938	75	+	74.6	-26.9	0.847	1	57	112
1	20614572	20616525	RLOC_00005939	12	+	12.1	4.6	1	1	348	777
1	20617080	20620136	RLOC_00005940	47	-	47.1	30.5	0.125	0.66	170	226
1	20617312	20618005	RLOC_00005941	3	+	2.6	1.9	0.584	0.988	114	250
1	20627906	20629692	RLOC_00005945	28	-	27.5	-24.2	0.422	0.882	112	147
1	20629697	20633007	RLOC_00005946	5	+	4.6	-0.7	0.733	1	574	792
1	20637379	20649102	RLOC_00005948	686	+	686.4	-643.1	1	1	105	161
1	20648089	20649029	RLOC_00005949	2	-	1.8	-1.7	1	1	3305	5294
1	20666165	20668850	RLOC_00005952	4	-	3.9	-0.7	0.347	0.822	1047	1528
1	20673767	20676449	RLOC_00005954	53	+	52.7	40.7	0.0669	0.645	118	144
1	20703902	20707106	RLOC_00005962	19	-	18.6	15.0	0.11	0.65	315	618
1	20707306	20709027	RLOC_00005963	5	+	5.3	-1.5	0.889	1	203	334
1	20711443	20715593	RLOC_00005965	133	+	132.7	126.4	0.0583	0.645	293	488
1	20715562	20719261	RLOC_00005966	16	-	16.0	-15.8	0.0557	0.645	795	1493
1	20719472	20722856	RLOC_00005967	37	+	37.5	-35.6	0.111	0.651	147	267
1	20723278	20725747	RLOC_00005968	14	+	14.5	13.3	0.317	0.8	88	136
1	20725469	20728091	RLOC_00005969	17	-	16.9	15.3	0.191	0.698	293	344
1	20729124	20731356	RLOC_00005971	11	-	11.0	-5.5	0.292	0.777	297	415
1	20787015	20791194	RLOC_00005985	17	-	16.6	11.6	0.692	1	148	243
1	20802496	20803610	RLOC_00005991	1	-	1.0	0.9	1	1	13399	23492
1	20803631	20807947	RLOC_00005993	48	-	48.2	46.5	1	1	1010	1607
[truncated: 9,710 more rows]
