# Supplementary material for: Widespread premature transcription termination of Arabidopsis thaliana NLR genes by the spen protein FPA
Source: eLife. 2021 Apr 27;10:e65537. doi: 10.7554/eLife.65537 (PMC8116057; doi:10.7554/eLife.65537)
Supplement: Figure 2—source data 5. [file elife-65537-fig2-data5.tds]

1	5885	13714	RLOC_00000002	69	-	68.8	-11.4	0.74	1	189	282
1	23139	31249	RLOC_00000004	26	+	26.1	7.3	0.963	1	212	306
1	31115	33315	RLOC_00000006	12	-	11.8	-3.1	1	1	511	799
1	33364	37871	RLOC_00000008	102	-	101.7	101.6	0.136	0.662	116	151
1	44797	49306	RLOC_00000011	206	-	206.4	202.1	0.00115	0.0276	917	1216
1	49908	51210	RLOC_00000012	2	-	1.6	-0.1	0.177	0.689	3390	6294
1	57163	59215	RLOC_00000014	2	-	2.1	0.8	0.293	0.787	253	304
1	61904	67705	RLOC_00000015	30	-	30.5	8.5	0.0859	0.64	568	1032
1	72315	74250	RLOC_00000017	27	+	26.8	-26.8	0.0762	0.64	130	161
1	73200	75031	RLOC_00000019	6	-	6.1	-5.7	1	1	1137	1926
1	75389	76845	RLOC_00000021	6	+	5.8	4.8	0.445	0.906	129	212
1	88621	90698	RLOC_00000025	139	+	138.9	138.9	0.000988	0.0243	180	270
1	95838	99251	RLOC_00000029	55	+	55.3	51.5	0.115	0.647	351	538
1	99865	101987	RLOC_00000030	18	+	18.3	16.7	0.287	0.783	215	325
1	108945	111699	RLOC_00000032	176	+	175.9	-168.2	0.00897	0.161	115	208
1	114191	116417	RLOC_00000035	228	+	227.6	-227.5	2.1e-06	0.000106	128	187
1	116783	118845	RLOC_00000036	3	+	3.0	-1.3	0.791	1	205	454
1	120081	130716	RLOC_00000038	55	-	55.3	-54.5	0.357	0.843	521	783
1	136089	138163	RLOC_00000042	19	+	18.5	2.3	0.703	1	92	152
1	141869	143261	RLOC_00000044	3	+	3.3	-2.8	0.363	0.849	338	454
1	156476	158823	RLOC_00000051	40	-	40.1	-40.1	7.51e-05	0.00246	525	650
1	159618	162953	RLOC_00000052	49	-	48.7	45.0	0.124	0.647	82	127
1	171524	172948	RLOC_00000057	2	-	1.9	-1.3	0.221	0.731	763	1395
1	180016	182749	RLOC_00000060	34	-	33.7	20.7	6.75e-10	7.53e-08	1627	2462
1	185032	187135	RLOC_00000061	21	+	20.9	12.4	0.06	0.64	108	221
1	187161	193138	RLOC_00000062	135	+	135.5	-110.1	0.363	0.849	128	187
1	195644	198787	RLOC_00000064	7	+	6.8	4.5	0.726	1	406	686
1	199526	201781	RLOC_00000065	6	+	5.8	5.6	0.00021	0.00603	2367	3572
1	221641	224351	RLOC_00000071	3	-	3.1	2.0	0.121	0.647	533	1016
1	225615	227528	RLOC_00000072	6	-	6.2	5.2	6.96e-12	1.13e-09	3979	5477
1	228798	231788	RLOC_00000073	17	+	16.6	15.5	0.109	0.647	303	569
1	232821	237905	RLOC_00000075	27	-	26.8	14.3	0.478	0.932	229	362
1	258761	267883	RLOC_00000081	281	+	280.8	118.5	1	1	258	366
1	267992	270517	RLOC_00000084	3	+	3.0	-2.5	0.637	1	751	1047
1	269757	274930	RLOC_00000085	30	-	30.4	9.5	0.652	1	466	501
1	270796	272189	RLOC_00000086	2	+	2.0	1.4	0.504	0.948	263	433
1	275187	276310	RLOC_00000087	10	+	10.0	-5.8	0.116	0.647	100	85
1	278007	284324	RLOC_00000090	138	+	137.7	75.9	0.609	1	68	114
1	284349	291222	RLOC_00000091	46	+	45.9	29.0	0.324	0.817	245	383
1	293245	295096	RLOC_00000093	5	+	5.5	5.4	0.264	0.764	495	1094
1	295843	298262	RLOC_00000095	6	-	5.8	5.6	0.000111	0.00346	468	859
1	298403	302407	RLOC_00000096	27	-	27.3	-9.0	0.837	1	122	182
1	304104	306311	RLOC_00000099	20	-	20.0	12.3	0.506	0.948	69	88
1	313097	316090	RLOC_00000106	26	-	26.3	20.8	0.0538	0.64	200	306
1	330535	337912	RLOC_00000112	44	-	44.5	43.2	0.3	0.793	303	524
1	338241	340093	RLOC_00000113	3	+	2.6	0.4	0.541	0.971	88	135
1	342818	344345	RLOC_00000115	17	-	17.2	-16.2	1	1	220	382
1	345515	347603	RLOC_00000116	26	+	26.0	-15.3	0.254	0.755	93	137
1	347612	355158	RLOC_00000117	47	+	46.9	32.7	0.67	1	62	105
1	357905	363105	RLOC_00000119	60	-	60.0	-47.7	0.61	1	81	118
1	373334	386913	RLOC_00000124	330	+	329.5	302.6	0.695	1	51	84
1	386760	389808	RLOC_00000125	20	-	20.4	-13.8	0.441	0.902	200	325
1	389820	400001	RLOC_00000126	443	+	442.7	436.0	0.00564	0.106	625	920
1	403099	404456	RLOC_00000130	4	-	4.3	-4.3	1	1	963	1680
1	404594	414345	RLOC_00000131	124	+	124.2	68.2	1	1	1415	2088
1	428630	430720	RLOC_00000137	43	-	43.1	43.0	1	1	46	201
1	440199	442972	RLOC_00000141	133	-	133.1	131.8	1	1	55	105
1	443099	446296	RLOC_00000142	42	-	41.5	-31.3	0.464	0.921	94	122
1	448420	452755	RLOC_00000143	95	-	95.5	95.2	1	1	416	738
1	453106	455582	RLOC_00000144	11	+	11.0	10.6	0.588	0.999	307	468
1	455668	458204	RLOC_00000145	10	+	9.8	8.8	1	1	689	1266
1	461829	467946	RLOC_00000150	132	-	132.0	62.7	0.168	0.685	501	665
1	469386	471809	RLOC_00000151	62	+	62.4	-13.5	0.327	0.82	89	103
1	470041	471625	RLOC_00000152	2	-	1.9	-1.3	0.491	0.941	426	577
1	471970	473336	RLOC_00000153	3	-	3.3	2.0	0.224	0.733	62	120
1	511757	515451	RLOC_00000165	30	-	29.9	-28.7	0.286	0.782	893	1448
1	518090	520495	RLOC_00000168	7	+	7.5	5.5	0.153	0.668	668	1386
1	537739	540127	RLOC_00000174	10	+	9.9	9.1	2.81e-12	5.06e-10	2460	3833
1	553010	556152	RLOC_00000181	28	-	27.5	-19.9	0.233	0.741	160	185
1	571825	575085	RLOC_00000188	55	-	54.7	49.7	1	1	213	257
1	580635	583195	RLOC_00000190	132	+	131.9	126.9	1	1	74	100
1	591681	594264	RLOC_00000195	19	+	19.3	3.0	0.686	1	50	64
1	594501	598657	RLOC_00000196	112	-	112.0	111.3	0.1	0.642	71	121
1	602478	604401	RLOC_00000198	16	+	15.8	15.8	1	1	240	405
1	607798	609534	RLOC_00000201	1	-	1.3	-1.0	0.56	0.984	3523	5974
1	621452	623054	RLOC_00000206	6	+	6.2	-3.5	0.785	1	380	595
1	623655	624567	RLOC_00000207	6	-	6.4	-0.1	0.121	0.647	260	279
1	626638	629996	RLOC_00000209	37	+	37.3	-9.1	0.116	0.647	255	404
1	630373	633420	RLOC_00000210	26	+	26.4	18.2	7.36e-06	0.000313	428	1022
1	635133	637367	RLOC_00000211	35	+	34.6	34.4	0.0586	0.64	175	234
1	645062	651988	RLOC_00000218	105	-	105.0	-43.5	0.64	1	82	103
1	653603	654457	RLOC_00000219	2	-	2.4	-0.9	0.774	1	371	502
1	655509	658205	RLOC_00000220	19	-	19.5	-0.8	0.682	1	100	175
1	661087	662475	RLOC_00000222	4	-	3.7	3.7	0.0605	0.64	637	4934
1	666806	669919	RLOC_00000226	12	-	11.7	6.6	0.972	1	118	164
1	687785	692660	RLOC_00000231	35	-	34.6	6.6	0.602	1	126	192
1	701360	703935	RLOC_00000234	10	+	9.9	-8.2	0.271	0.769	240	341
1	703829	706689	RLOC_00000235	9	-	8.9	7.6	0.654	1	197	333
1	731553	738306	RLOC_00000240	82	-	81.8	81.6	1	1	203	310
1	739672	746782	RLOC_00000241	18	+	17.7	16.0	0.394	0.869	489	546
1	752981	756340	RLOC_00000248	13	-	12.7	-12.7	1.55e-07	1.01e-05	11383	16119
1	754266	758692	RLOC_00000249	141	+	140.7	-133.2	0.191	0.702	163	313
1	761267	768235	RLOC_00000251	68	+	68.0	16.5	0.355	0.842	237	329
1	775523	780084	RLOC_00000255	115	+	114.6	22.9	0.341	0.83	49	70
1	786831	788722	RLOC_00000258	5	+	5.4	5.4	6.1e-05	0.00206	881	1415
1	789819	791689	RLOC_00000259	12	+	11.9	-1.6	0.301	0.794	128	202
1	793284	798461	RLOC_00000261	39	-	39.3	-25.9	0.605	1	282	455
1	802969	807112	RLOC_00000263	95	+	94.7	-68.1	0.251	0.753	90	97
1	807360	813216	RLOC_00000264	80	+	80.4	80.2	0.283	0.779	104	154
1	813412	816812	RLOC_00000266	5	+	5.0	-3.8	0.975	1	113	193
1	817933	819563	RLOC_00000269	12	-	12.2	11.5	0.166	0.682	210	354
1	822581	824410	RLOC_00000271	1	-	1.0	-0.8	0.711	1	165	342
1	824537	826421	RLOC_00000272	11	+	10.7	10.7	0.00504	0.098	125	241
1	826522	830413	RLOC_00000273	51	+	50.7	-43.5	0.219	0.729	86	105
1	830549	835411	RLOC_00000274	44	+	44.3	38.8	0.187	0.702	143	289
1	835770	844311	RLOC_00000275	161	+	161.1	-103.3	0.00424	0.0845	170	241
1	842560	844226	RLOC_00000277	4	-	4.1	-0.3	0.411	0.882	236	344
1	844440	847769	RLOC_00000278	35	-	34.7	6.2	0.961	1	144	130
1	845676	849655	RLOC_00000279	87	+	86.9	-79.0	1	1	240	336
1	852290	855027	RLOC_00000280	20	+	20.4	20.2	0.0839	0.64	192	240
1	868852	871308	RLOC_00000284	5	-	4.7	-4.0	0.439	0.902	622	936
1	877725	880243	RLOC_00000290	14	-	13.5	-5.5	0.774	1	100	99
1	880339	883556	RLOC_00000291	28	-	27.6	5.9	0.832	1	26	28
1	885532	890024	RLOC_00000293	871	-	871.5	-866.2	8.8e-05	0.00282	187	165
1	894231	897718	RLOC_00000297	45	-	44.7	44.6	1	1	142	216
1	898479	899794	RLOC_00000298	3	+	3.0	3.0	1	1	3594	5674
1	900684	903056	RLOC_00000300	30	+	30.4	30.3	1	1	132	220
1	907522	909650	RLOC_00000302	1	+	1.0	-0.7	0.385	0.865	948	1567
1	910030	913749	RLOC_00000304	157	-	156.6	-149.5	0.334	0.825	46	81
1	916771	918064	RLOC_00000307	1	-	0.6	0.2	0.818	1	2360	3000
1	933425	937152	RLOC_00000314	19	+	19.0	-13.8	0.329	0.822	205	414
1	937206	937287	RLOC_00000316	1	-	1.2	1.1	0.181	0.695	211	432
1	937400	937485	RLOC_00000317	1	-	0.9	0.8	0.354	0.84	92	257
1	959789	960916	RLOC_00000326	4	-	4.5	2.6	0.371	0.853	74	153
1	975840	977911	RLOC_00000329	19	-	18.9	10.0	0.614	1	195	420
1	979306	982002	RLOC_00000330	18	-	17.8	2.9	0.19	0.702	265	415
1	982371	983591	RLOC_00000331	2	-	1.8	0.9	1	1	1577	2482
1	991105	993126	RLOC_00000334	3	+	2.5	-0.9	0.695	1	400	691
1	993399	995989	RLOC_00000335	12	+	11.6	-11.6	0.215	0.726	16	26
1	996075	1000629	RLOC_00000336	13	+	12.6	-3.5	0.975	1	88	123
1	1004672	1008407	RLOC_00000338	68	+	67.8	-66.4	0.0961	0.64	117	176
1	1008493	1011358	RLOC_00000339	214	+	213.9	-138.4	0.117	0.647	94	132
1	1013651	1017963	RLOC_00000342	81	+	81.4	-31.7	0.49	0.94	50	82
1	1018057	1019247	RLOC_00000343	4	+	3.7	3.6	0.0574	0.64	230	381
1	1024392	1029108	RLOC_00000347	15	-	14.5	-4.4	0.971	1	116	183
1	1042229	1043931	RLOC_00000352	13	-	12.6	-12.5	1.82e-05	0.000714	662	959
1	1050504	1051194	RLOC_00000355	6	-	6.4	-4.2	0.639	1	87	169
1	1051304	1056838	RLOC_00000356	22	+	22.5	3.6	0.866	1	230	383
1	1059479	1061247	RLOC_00000358	20	+	19.7	18.4	0.588	0.999	33	74
1	1061251	1063821	RLOC_00000360	4	-	4.1	0.2	0.934	1	41	106
1	1064263	1071080	RLOC_00000361	42	-	42.1	-40.1	0.512	0.951	284	424
1	1073179	1075952	RLOC_00000363	33	+	33.1	-4.1	0.734	1	58	78
1	1075507	1080630	RLOC_00000364	47	-	46.9	-34.6	0.356	0.843	139	202
1	1096881	1100078	RLOC_00000367	52	+	52.4	35.7	0.356	0.842	108	126
1	1106353	1108725	RLOC_00000369	13	-	12.7	-6.5	0.903	1	155	234
1	1109394	1114155	RLOC_00000370	77	+	77.4	59.1	0.381	0.862	71	141
1	1114363	1119800	RLOC_00000371	100	+	100.1	25.3	0.737	1	50	102
1	1119152	1122575	RLOC_00000372	30	-	30.0	-28.3	0.933	1	65	92
1	1128088	1129689	RLOC_00000375	10	-	9.6	2.2	1	1	452	528
1	1136122	1138713	RLOC_00000377	41	+	40.6	-34.4	1	1	223	241
1	1140277	1143130	RLOC_00000378	17	-	16.6	12.8	0.347	0.836	724	1232
1	1143431	1157788	RLOC_00000379	410	-	409.9	406.1	1	1	885	1320
1	1162893	1166198	RLOC_00000383	42	-	42.3	37.9	0.865	1	53	92
1	1164909	1167135	RLOC_00000384	6	+	5.8	-4.5	0.167	0.683	840	1257
1	1185511	1188696	RLOC_00000390	10	-	10.3	10.1	0.0883	0.64	1039	1777
1	1188994	1191458	RLOC_00000391	6	-	6.5	6.4	6.78e-08	4.84e-06	5128	7944
1	1191518	1193884	RLOC_00000392	14	+	13.8	-12.2	0.0691	0.64	415	724
1	1202154	1208059	RLOC_00000395	40	+	39.5	-27.6	0.891	1	128	215
1	1215912	1217548	RLOC_00000401	6	+	6.5	6.1	0.243	0.746	383	1011
1	1226482	1230947	RLOC_00000407	9	+	9.5	3.3	0.785	1	387	532
1	1231505	1234504	RLOC_00000408	27	+	26.8	2.8	0.53	0.962	47	75
1	1234175	1236206	RLOC_00000409	7	-	7.2	1.9	1	1	322	533
1	1240293	1242209	RLOC_00000412	3	+	3.1	2.5	0.0728	0.64	192	319
1	1242505	1244244	RLOC_00000413	14	+	13.7	-11.0	0.897	1	62	100
1	1252004	1261458	RLOC_00000416	58	-	58.4	-33.4	0.925	1	93	187
1	1282162	1286619	RLOC_00000419	46	-	46.4	7.5	0.99	1	44	61
1	1287830	1291105	RLOC_00000420	2	-	2.4	0.7	0.97	1	308	567
1	1291311	1293396	RLOC_00000421	72	+	72.1	-63.5	0.11	0.647	184	305
1	1303466	1307973	RLOC_00000427	434	-	433.5	-424.3	3.37e-06	0.000157	290	462
1	1313442	1315823	RLOC_00000428	7	+	7.3	3.0	0.0603	0.64	733	1270
1	1321901	1324865	RLOC_00000430	54	+	54.0	52.6	0.0552	0.64	84	154
1	1331465	1333651	RLOC_00000433	3	-	2.8	0.0	0.621	1	833	1308
1	1336269	1337903	RLOC_00000436	14	-	13.9	7.6	1	1	440	689
1	1345041	1355483	RLOC_00000439	87	+	86.9	56.7	0.776	1	297	444
1	1348451	1349478	RLOC_00000440	2	-	2.1	1.1	0.107	0.647	881	1298
1	1356083	1358547	RLOC_00000441	3	-	3.4	3.4	0.000156	0.00466	3024	5512
1	1365044	1368940	RLOC_00000444	61	-	61.0	-45.5	0.141	0.664	167	224
1	1369035	1373107	RLOC_00000445	31	-	31.3	-27.9	0.336	0.827	134	191
1	1387798	1391381	RLOC_00000452	39	-	39.3	-38.5	0.0683	0.64	216	356
1	1399173	1403195	RLOC_00000456	91	+	90.6	-77.1	1	1	458	775
1	1403084	1407531	RLOC_00000457	34	-	33.8	-25.0	0.484	0.935	111	181
1	1407771	1410933	RLOC_00000458	15	-	15.2	-2.3	0.473	0.927	254	477
1	1411133	1413768	RLOC_00000459	6	+	6.2	5.9	0.453	0.912	558	936
1	1413624	1416218	RLOC_00000460	31	-	30.8	12.6	0.325	0.818	83	189
1	1416310	1421863	RLOC_00000461	348	-	348.1	-328.2	0.00278	0.0586	299	510
1	1425538	1428869	RLOC_00000462	21	+	21.4	6.7	0.338	0.828	388	599
1	1431176	1433010	RLOC_00000465	6	-	6.4	3.0	0.175	0.689	148	264
1	1448627	1450901	RLOC_00000473	26	-	25.8	-24.8	0.244	0.746	52	109
1	1450917	1455317	RLOC_00000474	76	-	76.3	-69.8	0.39	0.868	266	462
1	1457006	1458802	RLOC_00000475	11	-	10.9	-10.7	0.216	0.726	252	367
1	1471358	1476303	RLOC_00000482	33	-	33.5	14.1	0.353	0.839	83	143
1	1477413	1478932	RLOC_00000483	5	-	5.3	5.3	5.78e-06	0.000253	1152	2065
1	1480110	1481006	RLOC_00000485	10	-	10.2	-9.1	0.0761	0.64	144	185
1	1482517	1484119	RLOC_00000486	2	+	2.3	2.2	0.615	1	247	351
1	1484066	1487027	RLOC_00000487	17	-	17.4	17.4	1	1	145	178
1	1487371	1494236	RLOC_00000488	208	-	208.0	-159.9	0.339	0.829	124	249
1	1498113	1501953	RLOC_00000490	6	-	6.4	-2.4	0.999	1	219	356
1	1502242	1503943	RLOC_00000491	3	-	2.8	2.8	1	1	1589	2558
1	1504939	1509261	RLOC_00000492	186	+	186.4	-185.1	1	1	279	340
1	1509750	1511685	RLOC_00000495	23	+	23.1	23.0	0.321	0.814	49	68
1	1512792	1518900	RLOC_00000497	85	-	85.0	-54.4	0.651	1	110	147
1	1529766	1531484	RLOC_00000503	11	+	11.2	-1.5	0.41	0.882	215	260
1	1544907	1547836	RLOC_00000512	79	-	78.8	-78.8	1	1	118	194
1	1558769	1559919	RLOC_00000516	10	-	9.6	9.6	0.143	0.664	208	414
1	1564490	1567516	RLOC_00000518	38	+	38.0	37.9	0.124	0.647	149	209
1	1576821	1582672	RLOC_00000520	54	+	54.1	-50.8	0.437	0.9	135	186
1	1582499	1583728	RLOC_00000521	18	-	17.8	-16.2	0.117	0.647	220	394
1	1585343	1587806	RLOC_00000524	30	-	29.5	29.0	0.159	0.674	122	228
1	1594052	1595923	RLOC_00000526	20	-	19.7	-15.5	0.0912	0.64	235	432
1	1624930	1629303	RLOC_00000532	193	+	193.3	-192.9	0.00174	0.0398	292	511
1	1630848	1636018	RLOC_00000534	27	-	27.2	-17.1	0.736	1	124	180
1	1645299	1647435	RLOC_00000539	8	-	8.2	-1.1	0.335	0.826	476	481
1	1647574	1659611	RLOC_00000540	238	-	238.2	225.6	0.244	0.746	100	189
1	1661579	1664398	RLOC_00000542	45	-	44.6	35.9	0.179	0.692	77	142
1	1669349	1673923	RLOC_00000544	225	+	225.4	196.5	0.104	0.645	121	167
1	1682178	1689935	RLOC_00000548	223	+	223.3	12.0	1	1	70	135
1	1706735	1709360	RLOC_00000556	29	+	28.9	5.7	0.718	1	68	81
1	1714817	1717290	RLOC_00000559	36	+	36.3	36.3	0.0731	0.64	126	181
1	1717388	1718909	RLOC_00000560	6	-	5.6	-3.4	0.868	1	193	332
1	1730240	1732673	RLOC_00000570	20	+	20.0	1.8	0.726	1	86	107
1	1744760	1754043	RLOC_00000573	139	+	139.1	-113.3	0.143	0.664	604	800
1	1754129	1763903	RLOC_00000574	148	+	147.7	-96.9	0.524	0.957	178	233
1	1762316	1766317	RLOC_00000575	15	-	14.9	13.4	0.914	1	189	302
1	1766502	1768837	RLOC_00000577	3	-	3.4	3.4	1	1	5289	9513
1	1768919	1773449	RLOC_00000578	65	+	64.9	-46.2	0.22	0.729	89	127
1	1771358	1773376	RLOC_00000579	59	-	59.2	-58.4	0.0723	0.64	234	406
1	1779255	1784681	RLOC_00000581	27	+	27.3	24.4	0.285	0.782	503	692
1	1786845	1789736	RLOC_00000583	26	+	25.8	12.2	0.646	1	109	148
1	1800534	1803987	RLOC_00000587	8	-	8.2	5.0	0.465	0.922	317	570
1	1807944	1815568	RLOC_00000589	62	-	61.6	14.8	0.549	0.976	185	373
1	1815813	1817336	RLOC_00000590	14	-	13.8	-13.8	0.179	0.692	135	236
1	1820270	1821994	RLOC_00000594	8	-	8.4	-5.8	0.788	1	80	216
1	1822599	1826269	RLOC_00000595	25	+	25.3	-24.7	0.0509	0.64	229	331
1	1827995	1829944	RLOC_00000597	2	-	2.4	2.3	1	1	5968	9042
1	1830470	1832555	RLOC_00000599	17	-	17.5	9.0	0.796	1	60	93
1	1832940	1834942	RLOC_00000600	10	+	10.1	-3.9	0.251	0.753	163	220
1	1834761	1838066	RLOC_00000601	25	-	25.1	-14.7	0.328	0.821	164	218
1	1843378	1846328	RLOC_00000603	11	+	10.8	7.2	0.281	0.777	458	817
1	1846700	1849693	RLOC_00000604	18	+	18.0	7.4	0.842	1	98	118
1	1851315	1855173	RLOC_00000605	12	-	11.7	5.2	0.507	0.949	329	548
1	1857730	1860938	RLOC_00000608	21	-	20.9	13.4	0.493	0.942	262	532
1	1867000	1873851	RLOC_00000612	262	-	262.3	261.3	0.116	0.647	131	193
1	1882906	1883992	RLOC_00000614	19	+	18.7	18.5	1	1	114	313
1	1889141	1891391	RLOC_00000617	90	+	90.4	-89.6	0.00615	0.115	131	275
1	1892230	1894194	RLOC_00000618	13	-	13.2	11.7	0.418	0.888	226	353
1	1894226	1896974	RLOC_00000619	9	-	9.2	6.3	0.675	1	507	822
1	1897119	1899280	RLOC_00000620	19	+	18.7	18.7	1	1	251	380
1	1899943	1904896	RLOC_00000621	43	+	43.3	25.6	0.237	0.743	131	191
1	1906962	1911061	RLOC_00000623	16	+	16.0	3.3	0.651	1	295	445
1	1911118	1915077	RLOC_00000624	95	+	95.3	52.1	0.545	0.973	87	122
1	1922207	1926303	RLOC_00000629	12	+	11.9	-3.2	0.608	1	259	361
1	1944872	1946287	RLOC_00000637	16	+	15.8	14.0	1	1	99	168
1	1946780	1950889	RLOC_00000638	29	+	28.6	25.7	0.0827	0.64	307	455
1	1950595	1952880	RLOC_00000639	4	-	4.2	3.2	0.487	0.938	759	1262
1	1954673	1958866	RLOC_00000641	17	+	16.7	3.6	1	1	501	658
1	1960030	1963189	RLOC_00000643	5	-	4.9	-0.2	0.43	0.897	765	1214
1	1965594	1969558	RLOC_00000645	55	-	55.4	-51.4	0.23	0.739	120	147
1	1969657	1974526	RLOC_00000648	102	+	101.5	-99.6	0.0752	0.64	120	202
1	1989430	1990754	RLOC_00000652	16	+	15.7	-14.9	0.169	0.686	207	349
1	1990615	1992837	RLOC_00000654	9	-	9.1	-4.2	0.16	0.675	294	515
1	1992228	1997541	RLOC_00000656	42	+	41.7	36.2	0.0925	0.64	240	432
1	2001327	2003651	RLOC_00000658	3	+	2.9	-0.6	0.456	0.913	264	410
1	2001405	2007209	RLOC_00000659	25	-	25.0	-17.1	0.465	0.921	213	322
1	2010882	2013594	RLOC_00000661	5	-	4.7	-3.2	1	1	506	677
1	2027605	2034056	RLOC_00000665	84	+	84.0	84.0	1	1	2732	5058
1	2034165	2037471	RLOC_00000666	11	+	11.1	3.1	0.926	1	475	845
1	2040409	2049742	RLOC_00000669	4	+	3.8	-3.6	1	1	34463	56404
1	2048863	2052180	RLOC_00000670	16	-	16.4	-14.4	0.0528	0.64	315	389
1	2052222	2055548	RLOC_00000671	22	-	22.1	18.8	1	1	544	782
1	2055744	2067483	RLOC_00000672	314	-	314.4	-103.0	0.556	0.98	72	113
1	2067516	2070510	RLOC_00000675	40	+	39.9	0.4	0.803	1	52	96
1	2076083	2077701	RLOC_00000677	8	-	7.8	7.6	8.51e-11	1.12e-08	2664	3944
1	2083310	2087141	RLOC_00000680	83	+	83.5	-74.6	0.0919	0.64	139	166
1	2092902	2096784	RLOC_00000685	25	-	25.4	25.1	0.295	0.788	159	251
1	2096986	2097665	RLOC_00000686	5	+	4.6	-3.7	0.706	1	69	83
1	2097615	2103497	RLOC_00000687	114	-	114.4	-95.7	0.0697	0.64	158	188
1	2108511	2111063	RLOC_00000692	25	+	25.4	-20.6	0.208	0.722	143	225
1	2111322	2114686	RLOC_00000695	38	-	37.7	36.8	1	1	212	390
1	2130042	2135707	RLOC_00000702	18	-	18.3	-18.0	0.624	1	281	471
1	2135809	2140981	RLOC_00000703	92	+	92.1	-73.4	0.0856	0.64	138	200
1	2150157	2152541	RLOC_00000706	19	-	18.6	11.7	0.578	0.993	87	232
1	2152810	2155755	RLOC_00000707	6	+	5.6	-0.3	0.133	0.659	572	918
1	2155115	2156119	RLOC_00000708	9	-	9.3	-6.8	0.916	1	89	120
1	2158399	2160805	RLOC_00000711	19	-	18.8	10.0	0.781	1	66	113
1	2160900	2163369	RLOC_00000712	6	-	6.1	5.2	0.631	1	360	348
1	2168556	2172247	RLOC_00000716	91	+	90.9	89.9	1	1	783	1410
1	2173043	2175031	RLOC_00000717	5	-	4.7	-2.4	0.343	0.832	305	564
1	2178021	2184193	RLOC_00000719	36	-	35.9	-32.1	0.416	0.886	215	288
1	2189876	2190784	RLOC_00000723	12	-	12.4	12.2	1	1	153	397
1	2191265	2193834	RLOC_00000724	10	-	10.0	3.9	1	1	559	878
1	2193940	2195996	RLOC_00000725	88	-	87.9	-82.3	1	1	24	33
1	2199996	2201296	RLOC_00000727	17	+	17.1	16.9	0.00033	0.009	151	291
1	2204103	2207099	RLOC_00000729	35	+	34.9	34.5	0.181	0.695	131	178
1	2208476	2212718	RLOC_00000731	31	-	30.7	21.4	0.73	1	113	181
1	2215203	2216989	RLOC_00000732	14	+	14.4	14.2	0.242	0.746	200	325
1	2220180	2223018	RLOC_00000735	11	-	10.6	-4.8	0.907	1	186	266
1	2225738	2227705	RLOC_00000737	3	+	3.3	1.5	0.72	1	230	287
1	2238016	2241471	RLOC_00000741	11	+	11.1	8.1	0.735	1	404	606
1	2245646	2248951	RLOC_00000744	31	-	30.9	30.7	0.416	0.886	455	752
1	2249100	2254036	RLOC_00000745	6	+	6.2	1.3	1	1	2219	3414
1	2257277	2260113	RLOC_00000747	9	-	8.8	7.0	0.0968	0.64	911	1352
1	2260316	2262923	RLOC_00000748	11	-	11.3	11.2	0.391	0.868	280	443
1	2263036	2264574	RLOC_00000749	12	+	12.4	12.2	0.173	0.688	69	142
1	2264633	2269121	RLOC_00000750	77	-	77.4	77.2	0.19	0.702	140	236
1	2276042	2280502	RLOC_00000752	25	+	24.8	-23.6	0.459	0.918	370	538
1	2286186	2289403	RLOC_00000754	41	-	41.5	40.6	0.486	0.938	179	306
1	2291368	2294619	RLOC_00000756	12	+	11.7	-8.7	0.852	1	71	112
1	2296022	2299557	RLOC_00000761	36	-	36.0	35.0	0.12	0.647	89	141
1	2304434	2312399	RLOC_00000766	36	+	36.1	-20.8	0.693	1	157	260
1	2309533	2312385	RLOC_00000767	14	-	13.7	11.2	0.622	1	81	104
1	2331131	2333767	RLOC_00000773	10	-	10.2	9.2	0.42	0.89	285	492
1	2336476	2339391	RLOC_00000776	3	-	2.6	0.9	1	1	32055	51745
1	2341446	2342148	RLOC_00000778	1	+	0.6	0.3	0.61	1	3981	5199
1	2352112	2356416	RLOC_00000783	35	-	34.7	-12.5	0.438	0.9	143	218
1	2359110	2366736	RLOC_00000784	629	-	628.6	-622.9	5.08e-06	0.000224	312	614
1	2368776	2369739	RLOC_00000786	5	+	4.6	4.6	1	1	467	675
1	2370019	2374607	RLOC_00000787	11	-	11.0	3.5	0.854	1	295	477
1	2379594	2381390	RLOC_00000790	8	+	7.9	7.0	0.0642	0.64	607	1194
1	2381588	2388169	RLOC_00000791	53	+	53.2	29.5	0.89	1	95	165
1	2390530	2392628	RLOC_00000794	35	-	35.5	-0.7	0.146	0.664	89	122
1	2394984	2398826	RLOC_00000797	61	+	61.1	32.5	0.168	0.686	149	171
1	2397319	2402915	RLOC_00000798	264	-	264.2	253.5	0.393	0.869	64	85
1	2403991	2406049	RLOC_00000800	7	-	7.0	3.6	0.892	1	158	270
1	2407410	2409697	RLOC_00000802	2	-	1.9	1.4	1	1	2678	4528
1	2407471	2408135	RLOC_00000803	2	+	2.2	1.3	1	1	5312	8729
1	2412922	2413795	RLOC_00000805	3	+	2.7	-0.2	0.833	1	111	137
1	2416177	2420829	RLOC_00000808	65	+	65.1	60.3	1	1	199	285
1	2421088	2422066	RLOC_00000809	3	-	3.3	2.0	0.336	0.827	521	708
1	2422125	2423803	RLOC_00000810	4	+	4.1	0.1	0.634	1	280	491
1	2424053	2429225	RLOC_00000811	55	+	54.7	40.7	0.214	0.724	126	208
1	2428772	2432091	RLOC_00000812	22	-	21.9	-18.7	0.436	0.9	110	154
1	2437329	2439777	RLOC_00000814	1	+	0.5	0.4	0.802	1	7333	14150
1	2442569	2457401	RLOC_00000815	519	+	519.5	465.3	1	1	634	1157
1	2445436	2454647	RLOC_00000817	399	+	399.4	398.9	0.19	0.702	57	89
1	2458183	2460817	RLOC_00000818	1	+	1.4	1.2	0.454	0.912	2246	3746
1	2462948	2465545	RLOC_00000819	8	-	8.3	7.6	0.311	0.803	434	828
1	2465689	2467130	RLOC_00000820	5	-	5.0	5.0	0.136	0.662	168	297
1	2467144	2469316	RLOC_00000821	8	+	7.6	0.2	0.738	1	283	485
1	2473164	2475128	RLOC_00000823	45	-	45.1	-37.3	0.0969	0.64	106	150
1	2476952	2483810	RLOC_00000825	24	+	24.4	-9.9	0.804	1	227	316
1	2483239	2485726	RLOC_00000826	63	-	63.3	61.3	1	1	49	92
1	2489385	2493327	RLOC_00000829	108	-	107.5	-0.1	0.504	0.948	44	47
1	2495304	2498764	RLOC_00000831	29	-	28.9	28.9	0.251	0.753	181	271
1	2535250	2537950	RLOC_00000840	9	+	9.4	9.3	1	1	1302	1973
1	2539550	2542339	RLOC_00000844	47	-	46.9	-45.3	0.171	0.687	104	155
1	2561448	2562316	RLOC_00000850	7	-	7.0	3.3	0.101	0.642	190	223
1	2564089	2565230	RLOC_00000852	8	-	8.5	-1.8	0.644	1	121	182
1	2567419	2573448	RLOC_00000853	47	+	46.6	-46.2	0.145	0.664	320	463
1	2573626	2576782	RLOC_00000854	17	-	16.8	13.4	1	1	1106	1707
1	2576975	2580754	RLOC_00000855	78	-	78.3	76.7	0.729	1	39	72
1	2581008	2583389	RLOC_00000856	34	-	33.8	28.6	0.585	0.999	70	131
1	2583593	2586969	RLOC_00000857	810	-	809.9	-809.9	1.16e-08	9.67e-07	227	496
1	2607876	2609971	RLOC_00000862	193	+	192.9	-192.2	0.019	0.312	35	39
1	2614773	2621794	RLOC_00000864	52	+	51.6	14.3	0.438	0.9	279	449
1	2632786	2635866	RLOC_00000869	57	-	56.6	-56.4	0.271	0.769	82	164
1	2635938	2638025	RLOC_00000870	4	+	4.3	2.9	0.0644	0.64	1690	2818
1	2640741	2641898	RLOC_00000872	1	-	1.2	1.1	8.91e-13	1.71e-10	45293	72010
1	2642012	2643295	RLOC_00000873	8	+	8.2	-6.0	0.136	0.662	41	104
1	2643018	2646061	RLOC_00000874	18	-	18.5	-16.7	0.906	1	49	76
1	2646166	2657120	RLOC_00000875	457	+	456.8	-380.3	0.209	0.722	181	216
1	2658601	2661310	RLOC_00000876	122	+	122.4	-95.6	0.352	0.839	30	44
1	2672197	2674721	RLOC_00000879	9	+	9.3	1.0	0.863	1	84	145
1	2675777	2679875	RLOC_00000880	43	+	43.4	-5.8	0.733	1	96	175
1	2684173	2686150	RLOC_00000882	6	+	6.1	-5.2	1	1	645	1157
1	2685658	2688658	RLOC_00000883	11	-	11.1	3.4	0.623	1	292	497
1	2691053	2694685	RLOC_00000885	19	-	19.3	19.2	1	1	792	1517
1	2696380	2703217	RLOC_00000886	39	+	39.1	-21.5	0.671	1	413	643
1	2703339	2709550	RLOC_00000887	52	+	51.6	45.8	0.663	1	384	632
1	2709550	2711046	RLOC_00000888	17	-	16.5	-14.9	0.234	0.741	142	225
1	2712683	2714842	RLOC_00000889	4	+	4.2	4.2	1	1	1072	1685
1	2714993	2716532	RLOC_00000890	25	-	25.0	-5.0	0.272	0.77	67	127
1	2723676	2733651	RLOC_00000893	514	+	513.6	513.6	0.0584	0.64	70	104
1	2736689	2743947	RLOC_00000896	150	+	149.8	-129.8	0.291	0.787	86	154
1	2742918	2751278	RLOC_00000897	259	-	258.8	-235.4	1	1	688	1201
1	2752123	2753809	RLOC_00000899	9	+	9.2	5.2	1	1	614	932
1	2756887	2759889	RLOC_00000900	25	-	24.9	-21.9	0.239	0.745	259	386
1	2762583	2769002	RLOC_00000902	29	+	29.3	-8.2	0.96	1	151	202
1	2768964	2771465	RLOC_00000903	8	-	7.7	-3.9	0.21	0.724	265	353
1	2771619	2773531	RLOC_00000904	22	+	21.8	-3.1	0.378	0.86	99	150
1	2773940	2779319	RLOC_00000905	44	+	44.0	-37.8	0.266	0.766	202	286
1	2808520	2811227	RLOC_00000911	13	-	13.3	-10.8	0.825	1	176	311
1	2808759	2809775	RLOC_00000912	5	+	5.4	0.9	0.205	0.72	99	179
1	2812817	2818071	RLOC_00000914	82	-	82.3	80.5	0.358	0.844	127	242
1	2819051	2820637	RLOC_00000915	7	-	7.0	4.8	0.86	1	114	133
1	2821353	2825487	RLOC_00000916	30	-	29.7	27.8	0.148	0.665	289	443
1	2827058	2829378	RLOC_00000918	5	+	5.1	2.3	0.675	1	179	361
1	2839051	2841134	RLOC_00000920	20	+	20.4	-9.5	0.9	1	53	74
1	2846893	2848100	RLOC_00000923	2	-	1.8	-1.2	0.941	1	637	1030
1	2848148	2852270	RLOC_00000924	118	+	118.3	-101.6	0.222	0.732	72	145
1	2852362	2855941	RLOC_00000925	29	+	29.0	-14.2	0.287	0.783	255	391
1	2867202	2870745	RLOC_00000930	22	+	22.0	6.0	1	1	351	543
1	2873299	2877261	RLOC_00000931	14	+	13.9	-5.4	1	1	424	668
1	2882434	2886635	RLOC_00000935	26	+	26.3	25.3	0.708	1	702	1027
1	2895164	2899446	RLOC_00000939	101	-	100.8	-98.5	1	1	215	318
1	2899775	2904862	RLOC_00000940	50	-	50.2	-50.1	0.139	0.663	254	449
1	2911278	2915456	RLOC_00000942	84	+	83.6	-62.4	0.688	1	22	42
1	2921063	2925900	RLOC_00000944	33	-	32.7	-29.0	0.727	1	157	264
1	2927501	2929107	RLOC_00000945	7	+	7.5	7.5	1	1	3315	5238
1	2936474	2939481	RLOC_00000948	40	-	39.6	-33.6	0.106	0.646	125	283
1	2939553	2945964	RLOC_00000950	169	-	169.3	165.4	1	1	1358	2061
1	2946029	2949159	RLOC_00000951	30	+	30.2	24.2	1	1	220	376
1	2951533	2955693	RLOC_00000953	45	-	44.6	40.1	0.202	0.716	151	253
1	2964039	2972472	RLOC_00000956	115	-	115.0	-112.4	0.294	0.787	293	511
1	2972637	2977002	RLOC_00000959	7	-	7.4	-7.1	0.0617	0.64	955	1986
1	2977767	2982713	RLOC_00000961	68	-	68.4	-0.1	0.0501	0.64	253	391
1	2984828	2986231	RLOC_00000962	5	+	5.0	-3.8	0.145	0.664	471	602
1	2989119	2990418	RLOC_00000967	8	+	7.6	-6.3	0.985	1	117	187
1	2994216	2998232	RLOC_00000969	30	+	29.9	-14.7	1	1	417	619
1	2997454	3001314	RLOC_00000970	20	-	19.8	-5.0	0.847	1	135	177
1	3003494	3008404	RLOC_00000972	379	+	379.0	-378.4	1	1	61	68
1	3008896	3009954	RLOC_00000974	2	+	2.4	2.3	4.66e-11	6.58e-09	6736	11079
1	3009986	3015297	RLOC_00000975	196	-	195.6	-193.0	1	1	235	428
1	3015236	3018712	RLOC_00000976	4	+	4.4	-2.0	1	1	3173	5925
1	3031140	3040454	RLOC_00000981	336	+	336.1	-330.4	0.088	0.64	140	177
1	3037714	3041873	RLOC_00000985	88	-	87.5	81.2	1	1	296	394
1	3041995	3045541	RLOC_00000986	5	+	4.8	2.4	0.591	1	623	1057
1	3045156	3048006	RLOC_00000987	67	-	67.3	59.2	0.175	0.689	45	91
1	3049035	3055389	RLOC_00000988	126	+	125.8	80.7	0.568	0.988	115	137
1	3063935	3065999	RLOC_00000993	18	+	18.1	-13.6	0.159	0.674	189	272
1	3070855	3072273	RLOC_00000996	6	-	5.8	-3.8	0.373	0.855	184	308
1	3075767	3079654	RLOC_00000997	64	+	64.3	-61.6	1	1	285	348
1	3093643	3094954	RLOC_00001001	3	+	3.4	3.2	0.0544	0.64	680	1282
1	3095159	3100828	RLOC_00001002	10	-	9.8	-1.9	0.497	0.945	913	1146
1	3104491	3107801	RLOC_00001004	83	+	83.0	-76.5	0.0923	0.64	295	454
1	3111896	3116692	RLOC_00001007	6	-	6.5	5.2	0.257	0.757	725	1140
1	3119738	3122585	RLOC_00001010	5	+	4.8	1.1	0.282	0.779	1326	1985
1	3122925	3124741	RLOC_00001011	8	+	8.2	-3.7	0.175	0.689	207	325
1	3127744	3131082	RLOC_00001014	356	-	355.9	-348.5	1	1	55	51
1	3136187	3140353	RLOC_00001018	44	-	43.5	15.5	0.726	1	131	268
1	3147636	3154404	RLOC_00001021	55	-	55.4	-50.2	0.473	0.928	188	328
1	3154414	3156376	RLOC_00001022	5	+	4.6	-4.5	0.15	0.665	427	791
1	3157260	3161698	RLOC_00001023	64	-	63.8	-46.5	1	1	230	326
1	3157463	3159243	RLOC_00001024	4	+	3.6	-3.6	1	1	1031	1728
1	3161831	3165616	RLOC_00001025	19	+	18.8	-2.4	0.0708	0.64	439	606
1	3165310	3167899	RLOC_00001026	6	-	5.8	5.5	0.225	0.734	506	1031
1	3172083	3176965	RLOC_00001028	149	+	149.4	148.7	0.126	0.651	286	477
1	3176825	3180734	RLOC_00001030	30	-	30.1	29.8	0.427	0.895	601	1041
1	3189300	3190242	RLOC_00001033	1	+	0.9	0.9	0.137	0.663	344	629
1	3192567	3195044	RLOC_00001035	4	-	3.9	3.6	0.0703	0.64	81	138
1	3195718	3200403	RLOC_00001036	49	-	49.4	-7.8	0.402	0.876	164	247
1	3201684	3204150	RLOC_00001037	26	+	26.4	25.4	0.0524	0.64	185	343
1	3205578	3209447	RLOC_00001041	12	+	11.8	0.2	0.995	1	125	221
1	3218578	3227109	RLOC_00001046	52	-	51.8	-38.5	0.809	1	304	404
1	3252097	3255782	RLOC_00001055	3	+	2.6	2.3	0.0698	0.64	921	1791
1	3256188	3261741	RLOC_00001056	80	-	79.6	77.4	0.627	1	102	175
1	3262221	3264976	RLOC_00001057	197	-	197.1	189.3	1	1	58	66
1	3269538	3272110	RLOC_00001059	21	-	20.6	20.6	2.33e-07	1.44e-05	353	402
1	3273752	3275953	RLOC_00001060	31	+	31.3	-18.8	0.229	0.738	86	121
1	3284072	3287292	RLOC_00001063	49	+	49.2	-45.8	1	1	251	389
1	3288086	3290497	RLOC_00001064	28	+	28.3	-5.2	1	1	391	407
1	3290161	3296200	RLOC_00001065	60	-	59.9	7.3	0.463	0.92	207	308
1	3296515	3300516	RLOC_00001066	106	-	106.5	87.8	0.251	0.753	68	98
1	3304018	3306956	RLOC_00001071	30	-	30.1	30.1	0.581	0.995	119	192
1	3310940	3322336	RLOC_00001073	259	+	259.1	-253.4	0.0732	0.64	187	316
1	3322553	3323735	RLOC_00001074	3	-	2.5	-1.8	0.828	1	301	456
1	3325831	3327697	RLOC_00001075	39	+	38.6	26.5	0.161	0.676	66	76
1	3333491	3341629	RLOC_00001078	108	-	108.1	-78.2	0.516	0.953	367	508
1	3346382	3348139	RLOC_00001080	9	-	8.5	8.5	7.41e-07	4.18e-05	1158	2079
1	3355580	3356453	RLOC_00001084	10	+	10.1	-8.7	0.495	0.943	113	179
1	3356626	3359853	RLOC_00001085	40	-	39.7	-4.7	0.959	1	53	53
1	3370401	3377469	RLOC_00001091	77	+	76.8	76.6	0.47	0.925	149	290
1	3381377	3388378	RLOC_00001093	155	-	155.3	142.3	0.104	0.646	185	322
1	3390278	3392602	RLOC_00001095	6	-	6.4	1.1	0.948	1	47	169
1	3392767	3395089	RLOC_00001096	19	-	18.5	-0.3	0.429	0.896	114	174
1	3395495	3398577	RLOC_00001097	53	-	53.2	-50.1	0.136	0.662	681	1160
1	3400553	3402420	RLOC_00001098	10	+	9.5	-6.3	0.172	0.688	58	85
1	3406951	3412897	RLOC_00001101	26	-	26.4	11.0	0.902	1	160	239
1	3414822	3419691	RLOC_00001103	10	-	9.9	-7.7	0.846	1	225	396
1	3428431	3430640	RLOC_00001108	7	-	7.2	4.0	0.17	0.687	334	519
1	3441987	3444375	RLOC_00001113	13	-	12.8	-11.4	0.534	0.965	179	264
1	3459953	3461513	RLOC_00001116	2	-	1.8	0.7	0.713	1	459	767
1	3461514	3465753	RLOC_00001117	26	+	25.7	25.4	0.692	1	84	136
1	3487572	3491488	RLOC_00001127	76	+	75.9	-74.5	0.171	0.687	100	159
1	3491257	3495244	RLOC_00001128	146	-	145.5	-124.5	0.128	0.652	222	388
1	3501987	3503544	RLOC_00001131	8	-	7.5	7.4	0.15	0.665	476	944
1	3503610	3509027	RLOC_00001132	386	+	385.5	-377.0	1	1	319	559
1	3512738	3514824	RLOC_00001134	4	-	4.4	1.6	0.626	1	362	734
1	3515181	3518035	RLOC_00001136	26	-	26.4	25.0	0.389	0.868	94	142
1	3530352	3532017	RLOC_00001139	26	+	26.0	-22.3	0.423	0.893	98	195
1	3535326	3538371	RLOC_00001141	12	+	11.7	-2.5	0.462	0.92	340	547
1	3548847	3550767	RLOC_00001144	3	-	3.5	-0.7	0.946	1	73	91
1	3554103	3556645	RLOC_00001145	16	+	16.0	13.7	0.504	0.948	125	260
1	3562828	3564850	RLOC_00001150	21	+	21.2	15.6	0.294	0.787	133	202
1	3567904	3571062	RLOC_00001152	13	-	13.4	11.1	0.488	0.939	222	341
1	3580829	3590928	RLOC_00001157	110	-	110.2	-78.1	0.435	0.9	184	267
1	3599033	3605076	RLOC_00001162	205	-	205.4	-188.0	1	1	144	182
1	3605511	3607595	RLOC_00001164	5	-	5.0	-3.7	0.863	1	192	363
1	3607630	3610616	RLOC_00001165	6	-	6.5	3.3	0.304	0.796	502	758
1	3611544	3614826	RLOC_00001167	15	+	15.2	-8.6	0.941	1	113	215
1	3614507	3616308	RLOC_00001168	9	-	8.6	-5.0	0.659	1	245	352
1	3627658	3630836	RLOC_00001173	44	+	43.5	43.4	0.384	0.864	243	308
1	3632131	3637250	RLOC_00001174	35	-	35.3	30.9	0.626	1	184	261
1	3639834	3644187	RLOC_00001175	26	+	26.4	22.5	0.542	0.971	244	325
1	3644179	3658612	RLOC_00001176	1097	-	1096.6	1072.8	0.00268	0.0567	334	364
1	3659203	3665162	RLOC_00001177	56	+	55.9	-43.1	0.228	0.738	611	950
1	3665086	3667161	RLOC_00001178	45	-	44.9	-34.3	0.657	1	35	65
1	3681688	3684241	RLOC_00001185	28	+	27.9	-19.3	0.433	0.899	100	166
1	3684567	3689892	RLOC_00001187	112	+	111.6	106.7	0.433	0.899	56	102
1	3694327	3698013	RLOC_00001189	130	-	129.8	-72.0	0.122	0.647	47	77
1	3702558	3704119	RLOC_00001191	3	+	3.1	-0.5	0.774	1	102	181
1	3744834	3748557	RLOC_00001201	56	+	56.0	55.3	0.546	0.974	222	325
1	3750045	3752768	RLOC_00001203	140	-	140.3	139.9	0.145	0.664	35	36
1	3753297	3755916	RLOC_00001204	9	+	9.1	4.1	0.9	1	121	219
1	3755593	3756988	RLOC_00001205	9	-	8.7	4.2	0.519	0.955	71	99
1	3766753	3769799	RLOC_00001208	16	-	16.1	16.0	0.397	0.872	217	387
1	3777235	3780823	RLOC_00001212	28	+	28.5	-12.3	0.000159	0.00471	2056	2137
1	3787262	3790905	RLOC_00001215	39	-	38.9	-37.4	0.0666	0.64	166	312
1	3800499	3804266	RLOC_00001219	6	-	6.2	-4.6	0.303	0.795	720	1684
1	3809794	3813809	RLOC_00001222	88	+	87.6	82.6	1	1	94	367
1	3813871	3823088	RLOC_00001223	456	-	456.2	455.5	1	1	494	791
1	3832586	3834508	RLOC_00001226	7	+	7.2	6.0	0.976	1	175	220
1	3834406	3838304	RLOC_00001227	25	-	25.2	-6.3	0.873	1	104	147
1	3837693	3844474	RLOC_00001228	280	+	279.9	275.9	0.089	0.64	305	438
1	3847214	3850811	RLOC_00001231	8	+	8.1	2.9	0.741	1	885	1508
1	3853183	3855507	RLOC_00001232	53	+	52.6	-41.6	0.386	0.865	49	73
1	3862407	3864152	RLOC_00001235	11	+	10.6	0.6	1	1	466	893
1	3864042	3867000	RLOC_00001236	10	-	10.0	-9.0	0.765	1	270	411
1	3874394	3875530	RLOC_00001242	4	+	4.0	3.7	0.172	0.688	314	536
1	3895101	3897028	RLOC_00001253	9	-	9.3	-8.2	0.145	0.664	109	185
1	3901949	3903895	RLOC_00001257	32	+	31.9	31.9	1	1	77	111
1	3914631	3918243	RLOC_00001263	33	+	33.1	-6.4	0.127	0.651	306	524
1	3928114	3931701	RLOC_00001266	16	-	15.7	-3.4	0.826	1	151	233
1	3938421	3940871	RLOC_00001268	2	+	2.1	0.8	0.746	1	427	594
1	3945583	3946757	RLOC_00001272	9	+	9.3	3.3	1	1	261	403
1	3948713	3957063	RLOC_00001273	57	+	56.7	55.3	0.872	1	259	386
1	3963053	3966850	RLOC_00001278	32	-	32.3	21.0	0.802	1	62	51
1	3967475	3969877	RLOC_00001279	8	+	8.2	7.8	0.0813	0.64	565	1025
1	3971968	3973279	RLOC_00001282	7	-	7.1	6.9	0.173	0.688	78	127
1	3981152	3985224	RLOC_00001287	79	+	79.2	-76.0	0.184	0.699	113	224
1	3995157	3997965	RLOC_00001294	7	+	7.0	6.7	0.000281	0.00787	2174	4204
1	3999198	4000118	RLOC_00001295	4	+	3.5	-1.6	0.6	1	360	680
1	4001112	4006792	RLOC_00001296	18	+	18.2	-16.7	0.254	0.755	2174	3851
1	4007128	4010461	RLOC_00001298	23	-	22.5	-18.0	0.67	1	72	123
1	4010726	4013151	RLOC_00001299	11	+	11.1	2.6	0.746	1	225	346
1	4014781	4016544	RLOC_00001303	9	+	9.4	3.3	0.809	1	109	153
1	4016711	4021043	RLOC_00001304	4	-	4.4	2.1	1	1	5672	10501
1	4028594	4030656	RLOC_00001308	11	+	10.9	1.2	0.136	0.662	605	1060
1	4049826	4053862	RLOC_00001315	13	-	13.1	4.6	0.576	0.993	280	479
1	4056164	4057968	RLOC_00001316	11	+	11.0	3.2	0.812	1	165	157
1	4061362	4063549	RLOC_00001318	97	-	96.6	88.6	0.0737	0.64	109	140
1	4064484	4066344	RLOC_00001319	24	-	23.6	-6.6	0.084	0.64	143	172
1	4072754	4077330	RLOC_00001322	23	+	23.3	9.2	0.15	0.665	388	589
1	4084161	4085185	RLOC_00001325	4	+	4.2	-0.2	0.229	0.739	344	278
1	4089578	4090874	RLOC_00001326	77	-	76.9	76.8	9.29e-11	1.2e-08	594	430
1	4105215	4109601	RLOC_00001328	565	+	564.7	-561.5	1.35e-05	0.000546	172	381
1	4114673	4117614	RLOC_00001329	12	-	11.7	-5.5	0.641	1	316	488
1	4121368	4125120	RLOC_00001331	29	+	28.9	-5.8	0.225	0.734	190	312
1	4137510	4140158	RLOC_00001338	7	+	7.1	3.5	0.491	0.941	488	700
1	4144256	4151069	RLOC_00001341	59	+	59.0	-49.5	0.298	0.791	689	967
1	4153556	4161529	RLOC_00001342	239	+	239.3	-233.5	0.00214	0.0471	1012	1722
1	4171993	4174830	RLOC_00001345	16	+	15.8	-12.9	0.39	0.868	159	251
1	4186623	4190342	RLOC_00001348	37	+	36.6	-36.0	0.128	0.651	159	222
1	4186652	4188233	RLOC_00001349	9	-	9.2	9.1	0.0616	0.64	498	806
1	4194419	4196847	RLOC_00001352	18	+	17.7	5.6	0.232	0.739	60	121
1	4198365	4206486	RLOC_00001354	66	+	65.9	1.7	0.821	1	305	413
1	4214257	4217412	RLOC_00001356	21	-	20.5	-11.5	0.725	1	33	48
1	4220118	4222897	RLOC_00001357	17	+	16.9	5.0	0.785	1	205	300
1	4223029	4225254	RLOC_00001358	8	+	8.3	6.1	0.306	0.798	265	532
1	4241420	4243229	RLOC_00001362	2	-	1.9	-1.5	0.368	0.852	1102	1582
1	4247203	4250752	RLOC_00001364	36	+	36.2	21.3	0.843	1	70	125
1	4250944	4257457	RLOC_00001365	39	+	38.5	33.2	0.674	1	146	256
1	4266617	4270907	RLOC_00001371	44	-	43.9	-31.4	0.507	0.949	351	546
1	4282793	4285876	RLOC_00001376	36	+	35.7	30.5	0.196	0.707	226	340
1	4303254	4306101	RLOC_00001384	18	-	18.2	4.9	0.307	0.799	167	350
1	4305790	4308023	RLOC_00001385	23	+	23.5	11.9	1	1	195	293
1	4319864	4323265	RLOC_00001393	61	-	61.0	61.0	0.101	0.642	122	169
1	4326730	4328616	RLOC_00001395	10	-	10.4	2.9	0.981	1	77	144
1	4342208	4344875	RLOC_00001400	126	+	126.0	92.0	0.0966	0.64	39	54
1	4344940	4348390	RLOC_00001401	508	-	507.8	-505.7	0.00153	0.0358	104	126
1	4348497	4355993	RLOC_00001402	32	+	32.0	30.1	0.838	1	601	949
1	4353638	4361270	RLOC_00001403	52	-	52.3	-47.3	0.00191	0.0431	1761	2359
1	4361508	4365398	RLOC_00001404	8	-	7.8	4.4	0.862	1	259	426
1	4366576	4367136	RLOC_00001405	6	+	5.7	2.7	0.178	0.69	112	165
1	4367255	4368844	RLOC_00001406	5	+	5.4	2.3	0.0594	0.64	508	816
1	4368705	4371474	RLOC_00001408	61	-	61.5	-61.5	0.141	0.664	84	120
1	4374154	4375203	RLOC_00001410	8	-	8.0	-0.7	0.187	0.702	128	229
1	4374204	4378514	RLOC_00001411	79	+	78.7	-72.3	0.2	0.714	53	69
1	4378831	4379607	RLOC_00001412	11	-	10.6	10.5	1	1	177	404
1	4379693	4381764	RLOC_00001413	8	-	8.3	1.2	0.507	0.949	189	342
1	4384327	4387133	RLOC_00001415	15	+	14.7	2.9	0.0953	0.64	185	253
1	4389677	4391344	RLOC_00001417	14	+	14.2	-9.7	0.71	1	100	166
1	4392410	4394455	RLOC_00001419	1	-	0.9	-0.2	0.371	0.853	3695	5578
1	4394730	4398198	RLOC_00001420	30	-	29.9	-29.3	0.0668	0.64	562	796
1	4398297	4405669	RLOC_00001421	298	-	298.3	-283.7	0.148	0.665	82	106
1	4419713	4422684	RLOC_00001424	73	+	73.2	-72.2	0.0935	0.64	46	50
1	4433629	4436131	RLOC_00001428	33	+	33.4	31.2	0.127	0.651	152	226
1	4436088	4439639	RLOC_00001429	78	-	78.5	78.5	0.112	0.647	117	208
1	4440403	4443954	RLOC_00001431	12	-	12.1	5.8	0.824	1	140	208
1	4444020	4447401	RLOC_00001432	83	-	83.1	80.3	0.589	1	36	62
1	4452189	4454900	RLOC_00001434	4	+	4.4	4.4	0.136	0.662	498	942
1	4459001	4460996	RLOC_00001437	10	+	10.4	3.6	1	1	432	621
1	4461737	4463589	RLOC_00001438	1	+	1.2	-0.9	0.877	1	356	570
1	4463858	4465725	RLOC_00001439	5	+	5.0	5.0	0.269	0.768	88	130
1	4467078	4469069	RLOC_00001441	10	+	9.8	-3.3	0.5	0.947	130	255
1	4480792	4483835	RLOC_00001446	107	+	107.3	107.1	0.209	0.723	142	239
1	4498788	4501694	RLOC_00001451	86	+	86.3	85.0	0.225	0.734	400	608
1	4499665	4503574	RLOC_00001452	38	-	37.6	1.2	0.296	0.789	111	150
1	4515463	4520335	RLOC_00001455	156	+	156.1	105.2	0.6	1	41	49
1	4525224	4526197	RLOC_00001458	3	-	2.9	2.4	1	1	2674	3217
1	4528333	4530110	RLOC_00001461	6	-	6.2	2.9	0.286	0.782	139	183
1	4542167	4543970	RLOC_00001463	16	+	16.5	8.1	1	1	655	890
1	4544955	4549164	RLOC_00001464	92	+	92.5	-90.1	1	1	638	1139
1	4556871	4558859	RLOC_00001466	27	+	26.8	24.5	0.172	0.688	104	187
1	4563427	4567849	RLOC_00001468	11	-	10.6	6.4	0.696	1	399	567
1	4569447	4571229	RLOC_00001470	6	-	6.0	-6.0	1	1	109	245
1	4572279	4576711	RLOC_00001471	43	-	42.6	-24.4	0.482	0.934	146	213
1	4576872	4578369	RLOC_00001472	9	-	8.9	8.2	1	1	989	2015
1	4588993	4590501	RLOC_00001475	38	-	38.5	38.2	0.4	0.874	28	62
1	4592303	4594468	RLOC_00001476	18	-	18.4	14.8	2.05e-06	0.000104	483	777
1	4608076	4610878	RLOC_00001481	2	-	1.9	1.0	1	1	8803	13817
1	4612088	4612993	RLOC_00001483	58	+	58.2	-56.8	0.000932	0.023	82	99
1	4612649	4615219	RLOC_00001484	12	-	11.9	-2.0	0.377	0.858	305	448
1	4615767	4618548	RLOC_00001485	58	+	57.7	55.7	0.124	0.647	69	124
1	4636983	4644422	RLOC_00001497	120	-	119.8	92.2	0.392	0.868	346	502
1	4644520	4647142	RLOC_00001498	93	-	92.5	92.5	0.0907	0.64	68	121
1	4676947	4679808	RLOC_00001510	31	-	31.3	-30.6	0.111	0.647	191	307
1	4680289	4682382	RLOC_00001511	45	-	45.2	-36.5	0.411	0.882	87	79
1	4688017	4689265	RLOC_00001513	8	+	8.2	6.8	0.31	0.802	134	133
1	4693298	4695309	RLOC_00001515	6	+	6.1	3.7	0.21	0.724	284	437
1	4693763	4696487	RLOC_00001516	4	-	4.4	3.1	0.928	1	304	484
1	4709756	4712672	RLOC_00001520	27	+	26.8	-22.5	0.604	1	80	160
1	4714569	4718265	RLOC_00001522	20	-	20.2	-19.2	0.588	1	117	262
1	4733990	4735453	RLOC_00001530	16	+	15.8	-10.6	0.499	0.946	90	144
1	4735557	4738008	RLOC_00001531	34	+	33.8	33.8	1	1	321	538
1	4739692	4741189	RLOC_00001533	4	-	4.4	-1.3	0.813	1	91	155
1	4748872	4751262	RLOC_00001538	15	+	15.2	-4.9	0.162	0.676	171	332
1	4753092	4755659	RLOC_00001540	37	-	37.0	37.0	1	1	183	205
1	4760952	4762666	RLOC_00001544	3	+	2.7	2.4	5.37e-13	1.08e-10	12369	19372
1	4773433	4774980	RLOC_00001547	4	+	3.6	0.6	0.994	1	157	268
1	4776282	4779420	RLOC_00001548	28	+	27.6	27.5	0.536	0.968	128	199
1	4779350	4782546	RLOC_00001549	168	-	168.4	-168.4	0.0593	0.64	41	45
1	4788478	4796633	RLOC_00001550	64	+	63.6	27.4	0.758	1	282	396
1	4797244	4800306	RLOC_00001551	4	+	4.0	4.0	0.0733	0.64	442	745
1	4800145	4801859	RLOC_00001552	4	-	4.0	0.5	0.0758	0.64	191	409
1	4802678	4805373	RLOC_00001554	30	+	29.5	29.5	0.0587	0.64	72	156
1	4805251	4807510	RLOC_00001555	11	-	10.9	-2.1	0.221	0.731	189	266
1	4816338	4818025	RLOC_00001559	13	-	13.3	7.2	0.0777	0.64	155	253
1	4822450	4824432	RLOC_00001562	24	+	23.7	-19.1	0.904	1	36	62
1	4833395	4835118	RLOC_00001567	3	-	3.5	3.3	0.3	0.793	382	614
1	4835682	4837771	RLOC_00001568	34	-	33.9	-2.6	1	1	225	200
1	4837873	4840327	RLOC_00001569	6	-	5.6	-4.5	0.81	1	119	226
1	4839215	4840795	RLOC_00001570	5	+	5.0	-4.5	0.0799	0.64	238	382
1	4840561	4841848	RLOC_00001571	6	-	5.5	2.7	0.929	1	84	112
1	4852532	4857522	RLOC_00001577	407	+	406.5	406.5	0.0217	0.348	115	129
1	4854223	4855287	RLOC_00001578	4	-	4.0	-2.5	0.279	0.777	149	260
1	4856474	4858017	RLOC_00001579	11	-	11.0	-11.0	1	1	563	715
1	4861167	4864155	RLOC_00001581	61	+	61.1	-59.7	0.0231	0.367	162	236
1	4864880	4868011	RLOC_00001582	86	+	86.3	-70.3	0.0692	0.64	90	164
1	4868375	4871651	RLOC_00001583	56	+	55.7	-26.8	0.457	0.916	56	149
1	4874862	4877256	RLOC_00001585	18	-	18.2	14.4	0.423	0.893	174	259
1	4877451	4879483	RLOC_00001586	12	+	11.7	2.3	0.0013	0.0309	662	970
1	4880029	4882265	RLOC_00001587	15	-	15.1	14.7	0.378	0.86	226	339
1	4888146	4891663	RLOC_00001591	2	+	2.3	2.3	1	1	3179	5634
1	4897306	4900131	RLOC_00001593	6	+	6.4	0.8	0.875	1	967	1471
1	4911092	4913167	RLOC_00001597	18	-	17.6	15.2	0.838	1	61	104
1	4915490	4918138	RLOC_00001598	23	+	22.6	5.5	0.756	1	77	164
1	4917330	4921638	RLOC_00001600	37	-	37.1	-36.5	0.0874	0.64	270	433
1	4926485	4928812	RLOC_00001603	5	-	4.8	0.8	1	1	926	1454
1	4928930	4931111	RLOC_00001604	21	-	20.6	20.6	0.398	0.873	128	277
1	4946217	4947670	RLOC_00001608	2	-	2.0	1.5	0.806	1	643	1178
1	4948637	4953284	RLOC_00001611	88	-	87.8	87.2	0.473	0.928	53	83
1	4961593	4964515	RLOC_00001616	22	-	21.8	-20.7	1	1	453	735
1	4980623	4983367	RLOC_00001622	16	+	15.8	13.0	0.929	1	106	159
1	4983530	4987420	RLOC_00001623	21	+	20.7	-15.4	0.567	0.988	238	408
1	4989539	4992805	RLOC_00001624	37	+	36.9	36.9	1	1	102	120
1	4998668	5000679	RLOC_00001628	13	-	12.5	4.7	0.99	1	36	78
1	5000878	5003598	RLOC_00001629	60	-	59.9	45.5	0.12	0.647	82	122
1	5008139	5014529	RLOC_00001630	25	-	25.0	17.5	0.796	1	213	357
1	5014674	5016708	RLOC_00001631	5	-	5.2	-0.8	0.74	1	278	432
1	5019946	5021768	RLOC_00001632	30	+	29.8	22.8	0.356	0.842	64	109
1	5023449	5031908	RLOC_00001633	171	+	171.2	-94.3	0.135	0.662	240	339
1	5037575	5040597	RLOC_00001636	5	+	4.8	3.1	0.825	1	428	732
1	5042323	5045618	RLOC_00001638	11	+	10.7	1.0	0.668	1	318	448
1	5051587	5055278	RLOC_00001644	38	-	38.2	38.2	1	1	107	168
1	5058582	5061309	RLOC_00001645	16	+	16.2	-1.0	0.845	1	107	174
1	5061693	5065303	RLOC_00001646	71	-	70.6	-70.2	0.318	0.811	88	173
1	5075178	5077981	RLOC_00001649	79	-	79.0	79.0	1	1	58	119
1	5093960	5098270	RLOC_00001655	19	-	18.6	-16.9	0.902	1	143	209
1	5102369	5104891	RLOC_00001657	10	-	10.5	-7.6	0.152	0.667	322	573
1	5104974	5107107	RLOC_00001659	19	-	18.8	-15.6	0.235	0.741	140	335
1	5107396	5115640	RLOC_00001660	89	-	88.8	88.8	0.224	0.734	303	585
1	5116522	5123559	RLOC_00001661	65	-	64.8	5.1	0.66	1	116	204
1	5124669	5126329	RLOC_00001662	24	+	24.5	-17.4	0.506	0.948	70	107
1	5128343	5129731	RLOC_00001663	3	-	2.9	-0.4	1	1	753	2299
1	5136873	5137982	RLOC_00001666	9	+	8.7	5.5	0.251	0.753	107	104
1	5138081	5139582	RLOC_00001667	5	-	4.8	1.3	0.31	0.802	384	543
1	5139711	5143735	RLOC_00001668	8	-	8.2	2.1	0.989	1	169	274
1	5148936	5151427	RLOC_00001671	18	+	17.9	14.9	1	1	474	680
1	5159063	5160071	RLOC_00001675	6	-	6.3	-5.6	0.152	0.666	224	366
1	5165488	5168336	RLOC_00001677	14	-	14.2	6.9	0.302	0.794	1331	2451
1	5168463	5170066	RLOC_00001678	4	+	3.8	2.8	0.252	0.755	126	238
1	5171119	5176429	RLOC_00001680	32	-	32.2	-4.7	0.698	1	168	278
1	5177509	5183687	RLOC_00001683	16	+	15.8	-14.2	0.85	1	440	721
1	5179378	5181434	RLOC_00001685	13	-	12.6	-1.2	1	1	154	301
1	5181990	5186996	RLOC_00001686	30	-	29.9	22.4	0.718	1	187	238
1	5193283	5194214	RLOC_00001690	3	-	3.4	2.9	1	1	377	630
1	5202592	5205964	RLOC_00001692	2	+	2.2	-0.8	0.724	1	1658	3054
1	5205942	5209931	RLOC_00001693	9	-	8.6	3.6	0.311	0.803	402	557
1	5210158	5212455	RLOC_00001694	12	-	11.7	11.3	1	1	521	928
1	5220434	5224221	RLOC_00001699	53	-	53.3	-32.3	0.222	0.732	87	126
1	5224293	5226778	RLOC_00001700	1	+	1.1	-0.9	0.532	0.963	261	424
1	5228191	5231184	RLOC_00001703	10	-	10.2	-0.5	0.0568	0.64	310	423
1	5231344	5236886	RLOC_00001704	74	-	73.7	-52.4	0.443	0.904	103	109
1	5238045	5241710	RLOC_00001705	56	+	56.0	-54.8	0.225	0.734	54	92
1	5239986	5241538	RLOC_00001706	15	-	14.6	-4.2	0.655	1	71	108
1	5242072	5243262	RLOC_00001707	14	-	14.3	-2.7	1	1	433	735
1	5243382	5248737	RLOC_00001708	64	+	64.3	61.0	0.601	1	160	192
1	5248663	5252121	RLOC_00001709	4	-	4.0	-3.8	0.868	1	3036	4972
1	5249759	5250573	RLOC_00001710	40	+	39.7	-39.7	1.89e-07	1.2e-05	135	269
1	5252284	5256863	RLOC_00001711	31	+	30.7	26.7	0.269	0.767	262	403
1	5256673	5265100	RLOC_00001712	22	-	21.6	-9.3	0.761	1	468	630
1	5275615	5277869	RLOC_00001717	4	-	3.9	3.8	0.621	1	570	684
1	5278021	5279988	RLOC_00001718	7	-	7.3	5.8	0.0952	0.64	495	735
1	5286882	5288667	RLOC_00001720	5	+	4.6	-4.1	0.487	0.938	343	620
1	5290581	5292582	RLOC_00001721	6	+	5.9	-1.3	0.899	1	265	303
1	5294365	5297075	RLOC_00001723	45	-	44.6	-44.5	1	1	404	584
1	5294449	5296068	RLOC_00001724	10	+	9.9	7.8	0.145	0.664	103	192
1	5297846	5298571	RLOC_00001725	19	-	18.5	8.7	0.376	0.858	57	97
1	5297911	5300939	RLOC_00001726	47	+	46.8	46.0	0.257	0.757	141	251
1	5300732	5303522	RLOC_00001727	53	-	53.5	53.2	0.29	0.785	119	145
1	5304097	5306087	RLOC_00001728	5	+	4.9	3.6	0.436	0.9	126	189
1	5317972	5320648	RLOC_00001733	57	+	57.3	49.0	0.321	0.814	67	99
1	5320613	5323895	RLOC_00001734	38	-	37.6	-9.6	0.549	0.976	77	124
1	5325317	5328891	RLOC_00001735	15	+	15.3	-10.5	1	1	897	1379
1	5389951	5391672	RLOC_00001756	19	+	18.6	18.6	1.82e-08	1.47e-06	522	795
1	5398917	5403853	RLOC_00001759	9	+	8.6	3.2	1	1	1414	2620
1	5402529	5405527	RLOC_00001760	34	-	34.0	-32.0	0.281	0.777	62	76
1	5406133	5410035	RLOC_00001763	10	-	10.1	-2.2	0.906	1	156	291
1	5410783	5414985	RLOC_00001765	38	+	37.6	-37.4	0.407	0.879	146	177
1	5414359	5421045	RLOC_00001766	38	-	37.7	35.2	0.296	0.789	198	295
1	5444219	5446564	RLOC_00001775	10	+	10.1	8.8	0.547	0.975	157	211
1	5446442	5447878	RLOC_00001777	1	-	1.1	-0.3	1	1	42728	72668
1	5448059	5450621	RLOC_00001779	6	+	5.7	-0.6	0.519	0.955	145	229
1	5454765	5457022	RLOC_00001784	14	+	14.5	-6.4	0.345	0.833	353	579
1	5458395	5461124	RLOC_00001786	10	-	10.3	-4.1	0.619	1	315	545
1	5460489	5464252	RLOC_00001787	51	+	50.5	-47.4	0.285	0.782	148	236
1	5465338	5471149	RLOC_00001789	364	+	363.8	355.4	0.0167	0.278	61	137
1	5471315	5473293	RLOC_00001790	4	+	4.1	3.1	1	1	1619	2540
1	5473358	5478405	RLOC_00001791	60	+	60.3	43.4	0.371	0.853	108	151
1	5478702	5482648	RLOC_00001792	10	+	10.4	-8.9	0.366	0.852	1216	1853
1	5486272	5489132	RLOC_00001794	35	-	35.3	33.3	0.292	0.787	100	165
1	5489214	5492148	RLOC_00001795	11	+	10.7	10.1	4.47e-08	3.36e-06	1818	2485
1	5494526	5495435	RLOC_00001798	5	+	4.8	1.8	0.569	0.989	135	235
1	5495008	5497833	RLOC_00001799	5	-	4.8	-0.0	0.936	1	187	314
1	5498000	5501370	RLOC_00001800	31	+	31.3	-29.5	0.403	0.876	75	121
1	5504607	5507059	RLOC_00001804	30	+	29.7	23.1	0.468	0.924	77	150
1	5508310	5511738	RLOC_00001805	74	+	74.2	69.8	0.413	0.883	68	101
1	5514281	5516162	RLOC_00001807	7	+	7.2	4.4	0.000306	0.00846	690	1383
1	5518244	5521297	RLOC_00001810	129	+	129.4	-129.3	0.0134	0.228	91	186
1	5538665	5540002	RLOC_00001816	8	-	8.3	4.8	0.514	0.952	208	258
1	5540049	5542902	RLOC_00001817	3	+	2.5	-1.8	0.737	1	954	1777
1	5543145	5546190	RLOC_00001818	32	+	32.2	-18.3	0.259	0.759	82	144
1	5546098	5547753	RLOC_00001819	2	-	2.1	-0.6	0.791	1	391	647
1	5554842	5556844	RLOC_00001824	7	-	6.9	6.8	1	1	839	1327
1	5556580	5562273	RLOC_00001825	199	+	199.2	193.1	0.00261	0.0555	89	171
1	5558785	5562140	RLOC_00001826	24	-	23.8	4.7	0.872	1	86	189
1	5567741	5570679	RLOC_00001828	65	-	64.7	64.0	0.0779	0.64	56	103
1	5578264	5582210	RLOC_00001831	52	+	51.8	-50.6	1	1	751	1151
1	5590755	5593098	RLOC_00001834	16	+	16.5	16.0	0.0629	0.64	276	431
1	5602761	5604823	RLOC_00001838	54	+	54.1	45.3	1	1	71	128
1	5605035	5607493	RLOC_00001839	51	+	50.7	-49.6	0.191	0.702	93	117
1	5608681	5612064	RLOC_00001840	19	+	18.6	5.3	0.824	1	61	105
1	5619543	5622674	RLOC_00001846	15	-	14.6	11.5	0.423	0.893	453	739
1	5622745	5625683	RLOC_00001847	18	+	17.7	15.1	0.351	0.839	189	343
1	5638778	5640202	RLOC_00001851	4	+	4.4	-1.5	0.926	1	66	92
1	5648737	5651333	RLOC_00001856	25	+	25.3	-20.2	0.128	0.653	136	185
1	5659369	5668263	RLOC_00001858	138	+	138.4	-90.4	0.74	1	97	153
1	5668386	5670730	RLOC_00001859	10	+	10.3	5.0	0.91	1	142	268
1	5670547	5673648	RLOC_00001861	35	-	35.5	-34.2	0.67	1	96	146
1	5675494	5678873	RLOC_00001863	11	-	10.5	6.1	0.146	0.664	187	306
1	5697215	5699870	RLOC_00001870	65	+	65.4	61.2	0.126	0.65	94	198
1	5702116	5713752	RLOC_00001871	183	+	183.4	180.4	0.383	0.864	443	662
1	5713793	5722614	RLOC_00001872	64	+	64.0	-35.7	0.722	1	139	174
1	5722881	5729154	RLOC_00001873	235	+	235.4	219.6	1	1	1021	1520
1	5726319	5727407	RLOC_00001875	12	-	12.1	12.0	1	1	232	364
1	5739230	5755483	RLOC_00001880	481	-	480.6	-437.6	0.654	1	77	95
1	5744334	5745259	RLOC_00001881	3	+	2.6	-0.8	0.878	1	82	136
1	5755587	5756924	RLOC_00001882	6	+	6.5	6.5	0.0622	0.64	398	647
1	5757507	5760521	RLOC_00001884	17	+	17.2	16.7	0.674	1	278	477
1	5762645	5764157	RLOC_00001886	3	-	3.5	3.3	0.403	0.876	403	617
1	5764806	5765798	RLOC_00001887	15	-	15.2	8.3	0.683	1	49	65
1	5767279	5770656	RLOC_00001888	46	+	45.6	-37.8	0.183	0.698	117	211
1	5770731	5773322	RLOC_00001889	64	-	63.6	63.5	1	1	116	180
1	5773568	5777828	RLOC_00001890	6	+	6.5	-3.3	0.339	0.829	1216	2066
1	5776176	5778542	RLOC_00001891	10	-	10.1	10.0	3.09e-06	0.000149	1285	2060
1	5779007	5782433	RLOC_00001892	93	-	93.5	92.2	0.141	0.664	83	153
1	5786481	5789262	RLOC_00001895	24	-	23.6	20.5	0.305	0.796	442	772
1	5799694	5800887	RLOC_00001900	7	+	7.4	6.1	0.396	0.871	209	300
1	5820021	5822022	RLOC_00001905	15	+	15.3	14.1	0.173	0.688	160	362
1	5824770	5828295	RLOC_00001907	206	+	206.2	-201.7	0.067	0.64	31	64
1	5828914	5831383	RLOC_00001909	16	+	16.0	15.9	0.349	0.837	219	267
1	5831983	5835474	RLOC_00001910	190	-	190.2	99.4	0.429	0.897	29	36
1	5840185	5841719	RLOC_00001914	2	-	2.3	0.5	0.888	1	304	430
1	5842167	5844367	RLOC_00001915	115	-	115.5	-112.1	0.064	0.64	66	94
1	5844483	5850934	RLOC_00001916	27	-	26.8	9.7	0.893	1	120	178
1	5844562	5846527	RLOC_00001917	8	+	8.4	-5.0	0.101	0.642	366	957
1	5851846	5853991	RLOC_00001918	10	+	9.6	9.2	1	1	169	324
1	5860064	5862890	RLOC_00001923	19	-	19.4	3.4	0.784	1	108	146
1	5867534	5869436	RLOC_00001926	14	+	14.2	-11.7	0.176	0.689	132	215
1	5869542	5870883	RLOC_00001927	5	+	5.3	4.9	1	1	896	981
1	5875294	5876620	RLOC_00001929	5	+	4.7	0.6	0.825	1	127	167
1	5878394	5880190	RLOC_00001930	12	+	11.6	-11.6	0.000633	0.0164	1267	1936
1	5879607	5884786	RLOC_00001931	52	-	52.3	-32.8	0.0739	0.64	294	392
1	5885006	5890500	RLOC_00001932	12	+	11.6	11.6	0.305	0.797	695	1052
1	5890615	5895141	RLOC_00001934	124	+	124.1	-114.6	0.0912	0.64	73	91
1	5908845	5911698	RLOC_00001939	33	-	33.2	22.9	0.946	1	40	64
1	5916827	5920342	RLOC_00001942	28	-	28.1	27.7	0.0754	0.64	380	587
1	5922331	5926400	RLOC_00001944	8	+	7.7	-7.4	0.197	0.711	967	1732
1	5929814	5932005	RLOC_00001947	24	+	23.7	1.4	0.144	0.664	51	105
1	5933779	5938817	RLOC_00001948	19	+	19.0	-4.2	0.87	1	83	130
1	5946447	5951657	RLOC_00001951	62	+	62.1	61.2	0.492	0.941	128	202
1	5968380	5969995	RLOC_00001958	14	-	14.2	0.6	0.294	0.787	103	153
1	5996379	5998560	RLOC_00001965	13	+	13.4	8.6	0.915	1	75	121
1	6002895	6007420	RLOC_00001967	20	+	20.4	-2.6	0.801	1	177	257
1	6008436	6009420	RLOC_00001969	3	+	2.8	2.1	0.216	0.726	234	444
1	6017942	6023834	RLOC_00001971	34	+	33.7	15.4	0.88	1	141	247
1	6023464	6024331	RLOC_00001972	9	-	8.8	-4.5	1	1	120	242
1	6024628	6027565	RLOC_00001973	124	-	123.6	123.4	0.138	0.663	88	132
1	6027430	6029115	RLOC_00001974	13	+	12.7	12.6	0.219	0.729	97	192
1	6034269	6037398	RLOC_00001977	109	+	109.3	-71.5	0.0359	0.546	65	51
1	6037404	6038698	RLOC_00001978	44	-	44.5	42.2	0.304	0.796	42	71
1	6050130	6052628	RLOC_00001981	39	-	39.3	37.5	0.365	0.851	76	127
1	6061894	6063362	RLOC_00001985	2	+	1.8	-1.1	0.653	1	626	1011
1	6069423	6072140	RLOC_00001988	9	-	8.8	4.6	0.789	1	157	266
1	6076070	6082395	RLOC_00001992	133	+	132.8	-72.5	0.438	0.9	83	120
1	6089350	6090348	RLOC_00001994	6	+	6.2	0.1	0.44	0.902	56	61
1	6090404	6092027	RLOC_00001995	4	-	4.5	3.2	1	1	3826	7246
1	6093153	6098445	RLOC_00001996	116	-	116.0	-63.9	0.17	0.686	219	360
1	6099038	6100397	RLOC_00001997	5	+	5.0	4.9	1	1	288	481
1	6100963	6105347	RLOC_00001999	35	+	35.3	-34.5	0.0713	0.64	635	1501
1	6110034	6116609	RLOC_00002003	68	-	68.2	-30.8	0.938	1	83	133
1	6123556	6125339	RLOC_00002005	26	+	25.9	-22.9	0.204	0.719	106	148
1	6125276	6127918	RLOC_00002006	28	-	28.3	27.2	0.558	0.983	42	99
1	6135745	6138500	RLOC_00002010	44	-	44.2	43.6	0.0801	0.64	163	302
1	6142401	6146521	RLOC_00002013	15	+	15.1	12.0	0.11	0.647	613	1111
1	6145543	6148861	RLOC_00002014	107	-	106.6	106.4	1	1	71	101
1	6149177	6150038	RLOC_00002016	1	+	0.8	0.8	0.588	0.999	1022	2129
1	6149304	6153999	RLOC_00002017	12	-	11.6	5.2	0.813	1	587	1040
1	6154253	6155830	RLOC_00002019	3	-	3.2	3.1	1	1	379	681
1	6166219	6168845	RLOC_00002024	22	-	22.3	2.1	0.964	1	75	130
1	6184716	6187567	RLOC_00002028	57	+	57.2	-51.3	1	1	144	203
1	6187510	6196204	RLOC_00002029	65	-	65.2	34.3	0.737	1	262	482
1	6199734	6207037	RLOC_00002030	456	+	455.9	449.4	1	1	125	265
1	6206863	6209531	RLOC_00002032	37	-	37.4	37.3	0.0673	0.64	90	128
1	6211831	6213591	RLOC_00002035	25	-	25.2	-22.0	0.369	0.852	73	105
1	6213650	6218384	RLOC_00002036	12	-	12.0	-2.5	0.825	1	382	566
1	6220018	6221231	RLOC_00002039	16	+	16.5	16.3	0.0596	0.64	155	228
1	6222200	6224242	RLOC_00002040	13	+	12.9	12.7	0.16	0.676	319	536
1	6244297	6247830	RLOC_00002047	15	-	14.5	-1.0	0.976	1	136	252
1	6248618	6257907	RLOC_00002048	113	+	113.2	92.3	0.292	0.787	282	413
1	6257694	6261445	RLOC_00002049	67	-	67.0	53.7	0.211	0.724	77	117
1	6265176	6268873	RLOC_00002053	91	-	90.9	-89.0	1	1	652	1297
1	6276776	6278258	RLOC_00002059	23	-	23.1	-22.9	0.211	0.724	78	153
1	6278783	6282144	RLOC_00002060	13	-	12.7	12.3	0.674	1	205	309
1	6282169	6293993	RLOC_00002061	86	-	86.0	-55.5	0.833	1	172	252
1	6305813	6313941	RLOC_00002067	703	-	702.7	-701.0	1	1	156	216
1	6316710	6324378	RLOC_00002069	66	-	66.0	-21.6	0.64	1	198	334
1	6325535	6330179	RLOC_00002070	488	+	487.9	-487.9	0.00744	0.136	110	213
1	6331404	6333877	RLOC_00002072	63	+	62.9	-55.3	0.0472	0.64	90	111
1	6348047	6352010	RLOC_00002076	6	+	5.8	-2.6	0.937	1	261	428
1	6352329	6356261	RLOC_00002077	12	+	12.3	11.1	0.484	0.935	321	396
1	6355694	6360344	RLOC_00002078	15	-	15.2	-8.9	0.567	0.988	250	413
1	6361616	6366311	RLOC_00002079	156	+	155.9	-150.7	0.105	0.646	175	283
1	6366396	6368916	RLOC_00002080	20	+	20.3	-18.7	0.662	1	87	115
1	6368965	6373080	RLOC_00002081	6	+	5.8	2.0	0.962	1	320	461
1	6376638	6378580	RLOC_00002085	1	-	1.3	1.0	0.407	0.88	1126	2111
1	6389360	6391358	RLOC_00002088	42	+	41.6	-22.6	0.36	0.847	79	265
1	6395768	6398274	RLOC_00002089	13	+	12.9	3.0	0.946	1	65	114
1	6398530	6400029	RLOC_00002090	16	+	15.6	12.3	1	1	154	317
1	6405607	6416514	RLOC_00002092	487	+	487.3	60.4	1	1	275	405
1	6416178	6421188	RLOC_00002093	168	-	168.3	144.4	0.0741	0.64	310	519
1	6419038	6425898	RLOC_00002094	135	+	135.4	-134.1	0.435	0.9	111	164
1	6426708	6431093	RLOC_00002095	180	-	180.1	180.1	1	1	86	125
1	6431937	6433552	RLOC_00002096	23	-	23.4	22.8	0.121	0.647	90	197
1	6432929	6437236	RLOC_00002097	425	+	425.2	-423.6	1	1	125	163
1	6437476	6444238	RLOC_00002098	147	+	147.3	145.4	0.277	0.775	98	185
1	6457774	6460405	RLOC_00002102	2	-	1.7	0.0	0.913	1	905	1528
1	6459211	6462367	RLOC_00002103	30	+	30.3	26.9	0.591	1	71	262
1	6463806	6465566	RLOC_00002105	6	+	6.3	6.2	1	1	476	708
1	6465463	6466483	RLOC_00002106	18	-	17.7	-16.1	0.239	0.746	343	712
1	6481046	6483599	RLOC_00002113	22	-	22.3	2.5	1	1	334	535
1	6500752	6504567	RLOC_00002120	33	-	32.7	6.7	0.348	0.836	126	244
1	6504676	6506542	RLOC_00002121	24	-	23.6	18.8	0.305	0.797	93	119
1	6515372	6519412	RLOC_00002124	18	+	18.4	3.8	0.742	1	194	269
1	6546176	6552108	RLOC_00002133	107	+	107.1	106.4	0.241	0.746	98	175
1	6557180	6558115	RLOC_00002137	8	-	7.9	4.9	0.307	0.799	69	135
1	6558573	6562951	RLOC_00002138	16	-	16.3	15.8	1	1	1654	2599
1	6565509	6570951	RLOC_00002139	82	+	82.4	79.8	1	1	238	542
1	6577424	6579321	RLOC_00002142	42	-	41.8	38.6	0.179	0.692	69	111
1	6584223	6586571	RLOC_00002144	23	+	23.4	-23.4	0.523	0.957	97	165
1	6594883	6601377	RLOC_00002147	203	+	203.4	-192.3	0.55	0.976	48	65
1	6602104	6606028	RLOC_00002148	28	+	28.4	27.0	1	1	359	494
1	6608067	6609480	RLOC_00002150	5	+	5.2	3.6	0.314	0.806	350	656
1	6609278	6613052	RLOC_00002152	40	-	40.1	40.0	0.25	0.752	565	1067
1	6621776	6623620	RLOC_00002158	5	+	5.1	2.2	0.846	1	450	1015
1	6624905	6626217	RLOC_00002160	3	-	3.5	1.1	0.549	0.976	322	709
1	6626793	6633133	RLOC_00002161	148	-	147.8	-102.2	0.0938	0.64	76	86
1	6649242	6650464	RLOC_00002165	8	-	7.8	5.4	0.39	0.868	184	311
1	6676209	6677680	RLOC_00002173	2	-	2.3	2.1	0.795	1	157	213
1	6680396	6683559	RLOC_00002175	16	-	15.7	11.9	0.778	1	210	325
1	6688531	6691216	RLOC_00002177	5	+	5.3	1.0	1	1	1145	1553
1	6689495	6692496	RLOC_00002178	41	-	41.4	41.1	1	1	65	124
1	6692716	6695620	RLOC_00002179	62	-	62.0	-61.2	0.337	0.827	50	78
1	6697029	6697431	RLOC_00002180	8	+	7.9	7.1	0.184	0.699	44	105
1	6697873	6698858	RLOC_00002182	2	+	1.8	0.1	0.343	0.832	104	292
1	6709772	6712437	RLOC_00002185	713	+	713.1	-712.6	1.52e-07	1e-05	176	195
1	6711958	6716439	RLOC_00002186	17	-	16.7	15.5	1	1	827	1230
1	6724380	6728078	RLOC_00002190	14	-	13.7	-3.4	0.609	1	156	214
1	6731367	6734984	RLOC_00002192	40	-	40.4	40.4	0.0999	0.642	202	333
1	6759894	6762906	RLOC_00002200	12	+	12.0	11.9	0.724	1	90	142
1	6763745	6765177	RLOC_00002201	3	+	2.5	2.3	0.0789	0.64	531	792
1	6765649	6768290	RLOC_00002202	60	+	59.8	-49.2	0.135	0.662	92	140
1	6773248	6774611	RLOC_00002206	1	-	0.6	-0.2	0.391	0.868	2778	6046
1	6774682	6777568	RLOC_00002207	19	+	19.4	18.9	0.212	0.724	253	411
1	6778886	6781222	RLOC_00002208	24	+	23.8	-23.3	0.354	0.841	132	159
1	6781428	6782207	RLOC_00002209	4	-	4.4	3.7	0.269	0.768	152	657
1	6799968	6802906	RLOC_00002214	2	-	2.3	-1.0	0.401	0.875	2201	3207
1	6803425	6805091	RLOC_00002215	3	-	3.3	-0.7	0.806	1	410	1121
1	6805325	6807928	RLOC_00002216	23	+	22.6	11.5	0.67	1	62	102
1	6807679	6813063	RLOC_00002217	48	-	48.3	-4.4	0.548	0.975	365	567
1	6814538	6816952	RLOC_00002219	18	+	18.2	-0.6	0.898	1	69	84
1	6816611	6822745	RLOC_00002220	81	-	80.5	80.3	0.188	0.702	442	626
1	6822843	6824210	RLOC_00002221	7	-	6.6	6.3	0.416	0.886	356	668
1	6824320	6826194	RLOC_00002222	5	+	4.5	-3.6	0.0919	0.64	1217	1701
1	6832304	6834631	RLOC_00002224	6	+	5.7	1.6	1	1	966	1252
1	6846332	6848122	RLOC_00002227	10	+	10.5	-2.5	0.496	0.944	142	263
1	6855898	6860563	RLOC_00002230	73	-	73.0	68.7	0.0935	0.64	173	252
1	6886670	6891437	RLOC_00002232	118	+	118.2	117.8	0.148	0.665	102	136
1	6891362	6894752	RLOC_00002233	126	-	126.1	75.9	0.268	0.767	89	141
1	6895008	6898818	RLOC_00002234	15	-	14.5	-1.9	0.537	0.968	352	465
1	6900288	6904157	RLOC_00002235	30	-	29.7	-2.9	0.617	1	123	182
1	6913000	6914689	RLOC_00002238	2	+	2.2	2.2	1	1	1167	2067
1	6914517	6916823	RLOC_00002239	5	-	4.8	-3.0	0.803	1	327	601
1	6927735	6928656	RLOC_00002243	2	+	2.5	-0.9	0.353	0.839	307	1430
1	6933023	6935114	RLOC_00002246	29	+	29.2	-5.1	0.348	0.836	40	80
1	6935217	6936934	RLOC_00002247	7	+	7.2	2.1	0.961	1	89	157
1	6937718	6940832	RLOC_00002249	6	-	6.0	-1.3	0.62	1	477	1029
1	6942660	6945128	RLOC_00002252	7	+	6.7	6.7	0.000262	0.00738	1998	2629
1	6949000	6968965	RLOC_00002255	742	+	741.7	-736.4	0.0987	0.642	378	568
1	6969024	6971049	RLOC_00002262	9	-	9.5	-8.0	0.601	1	485	594
1	6971441	6977274	RLOC_00002263	72	+	72.0	-60.7	0.0152	0.255	564	887
1	6986311	6987863	RLOC_00002267	5	+	4.7	4.5	0.229	0.738	151	302
1	6987271	6993972	RLOC_00002268	44	-	43.8	33.4	0.672	1	102	94
1	6998056	6999841	RLOC_00002271	19	-	18.8	13.1	1	1	174	184
1	7001086	7004435	RLOC_00002272	7	-	7.2	-0.8	0.953	1	332	561
1	7016598	7020690	RLOC_00002278	27	+	26.7	-7.9	0.0112	0.196	742	1220
1	7020663	7023162	RLOC_00002279	39	-	39.2	39.1	0.426	0.895	80	160
1	7029576	7031555	RLOC_00002282	16	+	15.6	5.4	0.167	0.683	35	59
1	7038526	7040231	RLOC_00002285	4	-	4.4	-2.4	0.207	0.721	374	607
1	7042045	7043392	RLOC_00002286	2	-	2.0	2.0	1	1	46965	73765
1	7043626	7044653	RLOC_00002287	11	+	10.7	-3.0	0.0898	0.64	37	204
1	7083160	7085858	RLOC_00002299	72	-	71.8	70.8	1	1	2800	3596
1	7087902	7089606	RLOC_00002301	5	-	5.1	4.1	0.000555	0.0144	673	1082
1	7090940	7093442	RLOC_00002302	32	+	32.4	-21.5	0.284	0.781	90	153
1	7094190	7094927	RLOC_00002305	8	+	7.9	6.9	0.0673	0.64	74	105
1	7103361	7106121	RLOC_00002309	21	-	21.2	17.0	1	1	225	635
1	7112611	7115411	RLOC_00002313	19	+	18.9	-0.0	0.827	1	117	170
1	7119645	7126559	RLOC_00002315	42	-	42.2	-31.7	0.526	0.96	289	434
1	7126730	7128747	RLOC_00002316	14	-	14.0	13.6	0.19	0.702	219	359
1	7142619	7149908	RLOC_00002321	51	+	51.3	-51.3	1.58e-25	1.03e-22	40953	81791
1	7154409	7158287	RLOC_00002322	19	+	18.6	3.1	0.681	1	53	92
1	7157825	7160707	RLOC_00002323	17	-	16.6	0.5	1	1	361	534
1	7174276	7176617	RLOC_00002329	94	-	93.6	-84.4	0.12	0.647	109	169
1	7176746	7178895	RLOC_00002331	6	+	6.1	5.2	1	1	2424	3551
1	7179272	7181604	RLOC_00002332	4	+	4.4	3.9	1	1	2871	4187
1	7209297	7214993	RLOC_00002341	24	+	24.0	-20.3	0.863	1	196	300
1	7215009	7216897	RLOC_00002342	2	-	1.7	0.4	0.206	0.72	125	223
1	7217020	7220865	RLOC_00002343	19	+	19.3	12.8	0.869	1	98	180
1	7231980	7235128	RLOC_00002353	36	+	35.6	34.7	0.366	0.852	370	555
1	7238692	7239698	RLOC_00002354	2	+	1.5	0.2	0.956	1	153	287
1	7242895	7244981	RLOC_00002356	39	+	38.5	-38.3	0.0929	0.64	121	188
1	7244888	7248558	RLOC_00002357	12	-	12.0	-9.4	0.964	1	174	229
1	7252110	7253747	RLOC_00002359	5	+	5.4	-5.4	0.0816	0.64	247	432
1	7261995	7265555	RLOC_00002363	56	-	55.6	-20.5	0.172	0.687	115	180
1	7265791	7267392	RLOC_00002364	15	-	15.1	15.1	1	1	105	180
1	7272526	7274935	RLOC_00002365	14	+	14.5	-7.3	0.97	1	122	141
1	7276897	7281236	RLOC_00002366	45	-	45.5	-31.5	0.633	1	72	109
1	7285053	7292580	RLOC_00002367	25	+	25.0	7.5	0.509	0.95	304	488
1	7292388	7294746	RLOC_00002369	21	-	21.0	-19.6	0.177	0.689	103	192
1	7297233	7310262	RLOC_00002371	410	-	409.9	409.9	1	1	387	618
1	7313900	7319921	RLOC_00002372	25	+	24.6	11.9	0.611	1	170	293
1	7324470	7329441	RLOC_00002373	140	+	139.7	139.5	1	1	159	317
1	7337604	7339509	RLOC_00002376	31	+	31.3	30.6	1.04e-10	1.29e-08	989	1143
1	7346167	7347296	RLOC_00002378	15	+	15.1	4.0	0.0713	0.64	132	218
1	7370610	7375893	RLOC_00002383	103	+	103.4	85.3	0.000166	0.00489	913	1355
1	7375871	7378235	RLOC_00002384	54	-	54.3	52.3	0.121	0.647	56	74
1	7378535	7382661	RLOC_00002385	27	-	27.1	26.9	0.0547	0.64	355	662
1	7386761	7388514	RLOC_00002387	5	-	4.9	3.2	1	1	411	1045
1	7389980	7391603	RLOC_00002388	7	-	6.8	-5.5	0.562	0.985	108	315
1	7398813	7400820	RLOC_00002390	1	-	1.4	1.4	1	1	1308	3350
1	7404327	7405426	RLOC_00002392	15	+	15.0	12.2	1	1	137	122
1	7412567	7419656	RLOC_00002394	105	+	104.7	-95.4	0.358	0.844	104	169
1	7419657	7420957	RLOC_00002395	3	-	3.4	2.5	0.677	1	386	681
1	7421155	7427335	RLOC_00002396	347	+	347.3	-346.2	1	1	92	128
1	7439125	7442072	RLOC_00002402	10	+	9.8	4.3	0.207	0.721	105	746
1	7444636	7448483	RLOC_00002405	43	+	43.4	38.2	1	1	163	402
1	7453233	7455076	RLOC_00002410	3	-	3.4	3.4	1.52e-11	2.31e-09	21790	40516
1	7476889	7479258	RLOC_00002420	11	-	11.3	-4.6	1	1	528	776
1	7483780	7485675	RLOC_00002422	15	+	14.7	2.2	0.898	1	89	137
1	7485635	7488780	RLOC_00002423	14	-	14.5	-5.5	0.761	1	155	271
1	7489045	7490803	RLOC_00002424	11	-	11.3	-0.0	0.946	1	78	122
1	7493212	7499638	RLOC_00002428	101	+	101.1	86.0	0.0501	0.64	1386	2081
1	7502081	7504275	RLOC_00002431	4	-	4.5	3.4	0.681	1	277	399
1	7508678	7513472	RLOC_00002432	18	+	18.0	-1.4	0.208	0.722	211	327
1	7511749	7513481	RLOC_00002433	10	-	9.7	9.5	1	1	358	459
1	7518945	7521552	RLOC_00002435	29	-	29.4	24.4	0.826	1	61	67
1	7529704	7531108	RLOC_00002439	12	-	12.2	-10.6	1.76e-05	0.000695	3944	5669
1	7534018	7534927	RLOC_00002441	4	-	3.8	-0.1	0.479	0.932	387	791
1	7552986	7553975	RLOC_00002447	38	-	38.3	38.3	1	1	41	57
1	7554670	7557112	RLOC_00002449	18	+	17.9	16.3	0.115	0.647	153	257
1	7557139	7565914	RLOC_00002450	42	-	41.9	10.6	0.982	1	107	203
1	7566193	7570014	RLOC_00002451	43	-	42.7	39.6	1	1	292	645
1	7570844	7573847	RLOC_00002452	33	-	32.7	4.5	1	1	349	530
1	7573829	7578967	RLOC_00002453	107	+	106.5	-105.3	0.585	0.999	67	91
1	7581007	7588177	RLOC_00002455	38	+	37.9	1.3	0.923	1	184	267
1	7588413	7592952	RLOC_00002456	18	+	18.5	-5.2	0.403	0.876	290	469
1	7592649	7604359	RLOC_00002457	902	-	902.5	-900.3	0.152	0.667	70	118
1	7610240	7612721	RLOC_00002460	6	+	6.0	6.0	1	1	243	320
1	7612833	7615374	RLOC_00002461	1	+	1.5	0.4	0.144	0.664	1631	2238
1	7615504	7618628	RLOC_00002462	43	+	43.3	-26.9	0.302	0.794	107	155
1	7619884	7624125	RLOC_00002465	41	-	41.0	2.5	0.844	1	67	116
1	7626181	7628315	RLOC_00002467	7	+	6.5	3.9	0.487	0.938	219	405
1	7630097	7636688	RLOC_00002469	460	+	460.0	-458.6	0.00469	0.0923	104	161
1	7645609	7648855	RLOC_00002472	5	+	5.0	-1.0	0.238	0.745	671	1408
1	7649147	7654026	RLOC_00002473	121	+	121.3	-120.9	1	1	845	1424
1	7651571	7652288	RLOC_00002474	25	-	25.3	-25.3	7.99e-09	6.99e-07	781	1231
1	7660886	7662743	RLOC_00002479	89	-	89.3	-88.2	4.3e-07	2.53e-05	345	363
1	7666427	7668827	RLOC_00002481	24	+	24.3	0.3	0.126	0.651	84	126
1	7690801	7692459	RLOC_00002490	18	-	17.9	17.8	1	1	238	484
1	7696500	7698542	RLOC_00002491	21	+	21.3	18.9	1	1	345	521
1	7704147	7706355	RLOC_00002492	2	-	1.9	1.8	0.22	0.729	1502	1921
1	7712818	7714459	RLOC_00002495	7	+	7.0	5.6	0.44	0.902	239	432
1	7754269	7758188	RLOC_00002509	125	+	124.7	74.1	1	1	92	153
1	7767892	7770194	RLOC_00002512	24	+	24.3	-7.8	0.163	0.677	166	253
1	7771507	7773220	RLOC_00002513	21	+	21.1	-16.7	0.409	0.881	113	195
1	7772865	7781638	RLOC_00002515	66	-	66.4	63.1	0.747	1	128	161
1	7785707	7786477	RLOC_00002517	4	+	4.4	4.3	0.24	0.746	300	440
1	7789132	7792201	RLOC_00002518	7	+	6.9	-0.2	0.862	1	299	612
1	7814662	7815722	RLOC_00002527	12	-	11.9	9.7	1	1	394	672
1	7823065	7823971	RLOC_00002529	5	+	4.6	1.4	0.88	1	154	286
1	7826196	7828390	RLOC_00002530	13	+	13.3	-3.4	0.792	1	131	203
1	7828223	7830424	RLOC_00002532	43	-	43.0	-37.1	0.266	0.765	84	192
1	7835780	7837411	RLOC_00002534	19	+	19.2	12.2	1	1	860	1166
1	7837486	7840898	RLOC_00002535	28	-	28.2	-13.5	0.57	0.989	131	247
1	7846458	7847836	RLOC_00002537	12	+	12.4	-9.5	0.804	1	64	90
1	7865472	7866422	RLOC_00002542	3	+	2.6	0.6	0.739	1	389	621
1	7873866	7876018	RLOC_00002545	20	+	20.0	19.8	0.151	0.666	225	342
1	7878758	7881395	RLOC_00002547	5	-	5.3	2.2	0.0986	0.642	1747	3047
1	7886323	7889544	RLOC_00002550	142	+	142.1	-132.8	0.0794	0.64	92	118
1	7892757	7897705	RLOC_00002552	588	-	588.0	-586.9	4.11e-08	3.13e-06	267	672
1	7897825	7900335	RLOC_00002553	46	-	45.6	-43.6	0.0705	0.64	147	202
1	7903659	7906969	RLOC_00002556	64	-	63.8	55.6	0.699	1	49	67
1	7911900	7915093	RLOC_00002558	6	+	6.5	5.6	1	1	1025	2151
1	7919076	7921893	RLOC_00002560	36	+	36.1	-34.3	0.0901	0.64	433	713
1	7922251	7925097	RLOC_00002561	17	+	17.0	3.4	0.914	1	100	175
1	7925120	7927345	RLOC_00002562	7	+	7.1	-6.5	0.189	0.702	752	1265
1	7949475	7950900	RLOC_00002568	3	+	2.9	0.4	0.898	1	344	405
1	7950561	7954453	RLOC_00002570	88	-	87.8	86.6	0.19	0.702	277	494
1	7955420	7958575	RLOC_00002572	5	-	5.4	5.2	1	1	597	855
1	7966473	7968692	RLOC_00002574	42	-	41.8	-38.4	0.193	0.704	87	141
1	7994165	8002989	RLOC_00002580	96	-	96.0	-75.5	0.369	0.852	121	210
1	7994193	7997786	RLOC_00002581	8	+	7.6	6.4	0.807	1	215	288
1	8003222	8004317	RLOC_00002582	3	+	3.4	-2.9	0.258	0.758	437	668
1	8005931	8007583	RLOC_00002583	5	+	5.4	2.2	0.0768	0.64	543	700
1	8013348	8016150	RLOC_00002584	50	-	49.8	49.3	1	1	97	170
1	8027166	8028189	RLOC_00002588	0	+	0.4	0.2	1	1	4837	5841
1	8028082	8030136	RLOC_00002589	5	-	4.7	-2.8	0.993	1	119	186
1	8030586	8033156	RLOC_00002591	18	-	17.7	-11.0	0.803	1	115	146
1	8046132	8052953	RLOC_00002593	25	+	24.6	23.2	0.931	1	725	1109
1	8061750	8067790	RLOC_00002595	47	+	46.8	-0.8	0.793	1	127	186
1	8067870	8071582	RLOC_00002596	42	+	41.6	-38.8	0.118	0.647	1281	2386
1	8071788	8074357	RLOC_00002597	47	+	47.4	46.0	0.271	0.769	80	121
1	8076414	8080603	RLOC_00002600	4	+	4.3	3.7	0.869	1	1026	1794
1	8080461	8083012	RLOC_00002602	4	-	4.5	1.0	0.211	0.724	911	1333
1	8083183	8094509	RLOC_00002604	94	+	93.8	32.0	0.927	1	142	210
1	8095456	8097592	RLOC_00002606	102	-	101.7	-93.7	0.4	0.874	27	30
1	8098391	8102500	RLOC_00002607	12	+	12.0	-8.5	0.695	1	402	741
1	8102725	8103618	RLOC_00002608	17	+	17.5	15.9	0.0229	0.364	64	119
1	8103611	8104605	RLOC_00002609	26	-	26.4	25.7	0.0667	0.64	75	119
1	8104992	8108361	RLOC_00002610	159	+	159.2	-157.1	0.00416	0.0833	126	202
1	8109573	8112061	RLOC_00002611	11	-	10.7	7.6	0.52	0.956	191	314
1	8117285	8122151	RLOC_00002612	25	+	24.6	-19.0	0.812	1	252	180
1	8130603	8134388	RLOC_00002616	46	-	46.2	37.7	0.206	0.72	177	283
1	8139113	8140233	RLOC_00002618	8	+	8.2	7.3	0.0539	0.64	147	284
1	8143226	8145174	RLOC_00002619	18	+	18.4	16.3	0.825	1	67	94
1	8156503	8159185	RLOC_00002624	7	+	6.7	5.8	0.523	0.957	415	571
1	8164781	8166862	RLOC_00002626	6	+	5.8	4.8	0.936	1	218	365
1	8170607	8173085	RLOC_00002629	27	-	26.9	15.0	0.9	1	67	83
1	8180116	8183650	RLOC_00002631	16	-	15.8	-8.7	1	1	851	1108
1	8195772	8196913	RLOC_00002633	4	+	4.3	-3.1	0.888	1	94	169
1	8196446	8198331	RLOC_00002634	51	-	51.4	-50.6	1	1	363	613
1	8198585	8199616	RLOC_00002636	6	+	5.7	-1.9	0.931	1	118	185
1	8200323	8201267	RLOC_00002637	4	+	3.7	3.7	1.09e-15	3.77e-13	11379	14798
1	8202145	8203301	RLOC_00002638	7	-	6.9	2.9	0.204	0.719	297	521
1	8206547	8207645	RLOC_00002642	4	+	3.9	-0.2	0.738	1	116	242
1	8212646	8219652	RLOC_00002644	65	+	64.9	-60.3	0.816	1	108	181
1	8219807	8224547	RLOC_00002645	21	+	21.1	20.9	0.0653	0.64	590	1015
1	8233952	8235019	RLOC_00002648	16	-	16.0	15.8	1	1	79	130
1	8242360	8252056	RLOC_00002650	221	+	220.7	-214.9	0.298	0.792	234	394
1	8256853	8258741	RLOC_00002653	4	-	3.8	2.5	0.853	1	398	777
1	8260559	8266048	RLOC_00002655	52	-	51.6	50.8	0.811	1	91	132
1	8267809	8271996	RLOC_00002657	4	-	4.4	3.6	1	1	3680	6556
1	8279553	8282421	RLOC_00002659	53	-	52.9	-52.3	0.142	0.664	75	162
1	8295077	8296941	RLOC_00002662	10	-	9.9	-5.3	0.526	0.959	130	297
1	8308964	8310916	RLOC_00002668	10	-	10.0	9.5	1	1	1435	1676
1	8311966	8315876	RLOC_00002669	25	-	24.7	-11.6	0.0578	0.64	371	536
1	8314852	8315737	RLOC_00002670	12	+	11.9	-9.4	0.868	1	42	73
1	8321589	8329910	RLOC_00002673	134	+	134.0	131.4	0.111	0.647	689	950
1	8332892	8336430	RLOC_00002675	37	+	36.6	-0.9	0.583	0.997	180	281
1	8336579	8338827	RLOC_00002676	5	+	5.0	3.6	0.00177	0.0402	1834	3372
1	8385201	8386551	RLOC_00002699	18	+	18.5	18.2	0.000201	0.00582	146	222
1	8388296	8391623	RLOC_00002701	8	+	7.7	-7.3	0.432	0.898	571	468
1	8395465	8398387	RLOC_00002702	33	+	33.1	-32.5	0.00279	0.0587	882	1636
1	8398114	8399836	RLOC_00002703	1	-	0.5	0.4	0.823	1	1732	2676
1	8400055	8401550	RLOC_00002704	10	+	9.5	-5.6	0.525	0.958	140	216
1	8406662	8408530	RLOC_00002707	19	-	19.3	17.1	1	1	198	305
1	8420183	8422991	RLOC_00002711	6	+	6.4	-3.4	0.56	0.984	646	1082
1	8422823	8425389	RLOC_00002713	305	-	304.7	-304.5	1	1	93	143
1	8427242	8429570	RLOC_00002716	32	-	32.4	-30.6	0.00361	0.0741	352	530
1	8432061	8438811	RLOC_00002717	42	+	42.2	29.1	0.867	1	188	255
1	8441067	8447681	RLOC_00002719	58	+	58.0	-25.5	0.684	1	181	238
1	8478387	8481599	RLOC_00002726	9	-	9.1	8.3	0.567	0.988	480	748
1	8500118	8502065	RLOC_00002734	2	-	2.4	-2.0	1	1	1011	3674
1	8502312	8506815	RLOC_00002735	185	-	185.4	-183.7	0.000693	0.0178	198	339
1	8506971	8508936	RLOC_00002737	13	+	12.6	4.3	0.00318	0.066	462	867
1	8520431	8524932	RLOC_00002743	269	+	269.4	266.8	0.121	0.647	40	76
1	8525333	8527087	RLOC_00002745	6	-	5.6	2.0	0.286	0.782	357	675
1	8529031	8532262	RLOC_00002747	17	-	16.8	-6.0	0.787	1	108	172
1	8540837	8542053	RLOC_00002751	8	+	7.7	4.7	1	1	136	438
1	8544273	8545628	RLOC_00002753	9	+	9.0	7.3	1	1	298	516
1	8553312	8556750	RLOC_00002756	22	-	22.2	-14.0	1	1	488	559
1	8557214	8559066	RLOC_00002757	13	-	12.9	12.9	0.000158	0.00471	376	667
1	8560397	8570594	RLOC_00002758	99	-	99.3	85.6	0.136	0.662	616	1023
1	8586334	8588180	RLOC_00002764	15	+	15.5	14.3	0.294	0.787	117	207
1	8604021	8607484	RLOC_00002770	24	-	23.7	22.6	0.0854	0.64	254	435
1	8612436	8620696	RLOC_00002774	70	-	70.4	67.1	0.951	1	115	147
1	8624037	8626465	RLOC_00002775	30	+	30.2	-30.0	0.165	0.68	72	93
1	8635192	8639082	RLOC_00002778	48	+	48.0	47.0	0.117	0.647	102	176
1	8638519	8640825	RLOC_00002779	34	-	33.9	33.9	1	1	201	338
1	8640560	8644436	RLOC_00002780	5	+	4.6	2.9	0.831	1	449	792
1	8651381	8653915	RLOC_00002788	6	-	6.2	3.9	0.59	1	71	96
1	8661872	8664046	RLOC_00002793	8	+	8.5	2.6	0.319	0.813	251	347
1	8664063	8665569	RLOC_00002794	6	+	6.2	6.1	0.0841	0.64	212	369
1	8665741	8672757	RLOC_00002795	68	+	68.1	68.0	0.166	0.683	124	184
1	8682197	8685325	RLOC_00002801	22	+	22.1	13.1	0.105	0.646	304	436
1	8685177	8688250	RLOC_00002802	12	-	12.0	9.5	0.462	0.92	496	871
1	8692810	8695083	RLOC_00002804	16	+	16.4	4.7	1	1	352	455
1	8702360	8705879	RLOC_00002807	33	+	32.6	-32.4	0.126	0.65	151	243
1	8710846	8711578	RLOC_00002810	2	-	2.1	1.9	0.281	0.778	376	732
1	8719932	8722761	RLOC_00002813	137	-	136.5	-136.1	8.7e-05	0.0028	159	237
1	8725831	8727348	RLOC_00002816	9	-	8.7	4.8	0.214	0.725	169	232
1	8741835	8755604	RLOC_00002822	1502	+	1502.2	-1502.1	0.0617	0.64	57	76
1	8755993	8756582	RLOC_00002823	3	-	3.0	-2.0	0.415	0.885	364	707
1	8835418	8839609	RLOC_00002848	6	-	5.6	3.3	0.97	1	145	456
1	8839925	8842405	RLOC_00002850	21	-	20.8	-20.7	0.00559	0.106	525	764
1	8853533	8855874	RLOC_00002857	8	-	8.5	8.2	0.318	0.811	464	709
1	8860526	8861522	RLOC_00002859	2	+	1.6	1.6	1	1	6488	13632
1	8863767	8866894	RLOC_00002861	18	+	18.3	-12.7	0.461	0.919	150	247
1	8867023	8869289	RLOC_00002862	37	+	37.1	35.3	0.201	0.715	135	243
1	8889011	8894325	RLOC_00002869	21	-	20.7	0.7	0.726	1	267	444
1	8900018	8909334	RLOC_00002872	550	-	549.7	433.1	0.213	0.724	84	150
1	8903404	8906455	RLOC_00002873	12	+	11.7	-8.5	0.663	1	141	211
1	8911095	8912822	RLOC_00002874	10	-	10.1	1.3	0.884	1	47	78
1	8915914	8918279	RLOC_00002876	10	+	10.2	2.1	0.14	0.664	264	451
1	8922549	8924511	RLOC_00002878	20	+	19.9	-16.6	0.512	0.951	64	122
1	8933198	8935482	RLOC_00002881	5	-	4.9	4.6	0.0502	0.64	969	1729
1	8951161	8955160	RLOC_00002887	35	+	35.3	11.0	0.586	0.999	187	297
1	8964543	8967562	RLOC_00002891	106	-	105.8	-104.4	0.231	0.739	100	155
1	8976325	8978305	RLOC_00002893	2	+	1.8	1.7	0.182	0.696	930	1234
1	8981555	8983314	RLOC_00002894	7	-	6.7	3.8	1	1	1448	1902
1	8991707	8995617	RLOC_00002895	21	-	21.2	-7.3	0.703	1	99	191
1	8996713	8999917	RLOC_00002896	17	-	16.8	-5.1	0.959	1	106	143
1	9002237	9004716	RLOC_00002897	15	-	15.2	-7.9	0.448	0.908	144	288
1	9020341	9023508	RLOC_00002901	27	+	26.5	8.8	0.852	1	94	117
1	9022523	9024170	RLOC_00002903	10	-	10.2	-5.6	0.818	1	124	211
1	9024326	9027955	RLOC_00002904	31	-	30.6	30.6	0.155	0.669	458	629
1	9028328	9032327	RLOC_00002905	61	-	61.2	-56.5	0.162	0.676	107	174
1	9038707	9043861	RLOC_00002908	18	-	17.7	4.6	0.363	0.849	486	849
1	9044421	9047049	RLOC_00002909	8	-	7.9	1.6	0.513	0.951	208	376
1	9047238	9054961	RLOC_00002910	168	-	168.4	-139.5	0.639	1	62	89
1	9054672	9057020	RLOC_00002911	17	+	17.0	9.7	0.505	0.948	132	219
1	9056976	9061140	RLOC_00002912	84	-	83.9	38.0	0.486	0.938	52	65
1	9063270	9075307	RLOC_00002913	150	-	149.8	26.9	0.637	1	305	402
1	9066280	9068693	RLOC_00002914	40	+	39.6	38.3	1	1	159	394
1	9070892	9075586	RLOC_00002916	33	+	33.0	-14.4	0.11	0.647	446	606
1	9075733	9076725	RLOC_00002917	26	-	25.7	17.2	0.161	0.676	101	168
1	9089468	9092560	RLOC_00002922	15	-	15.4	15.1	0.367	0.852	235	289
1	9095767	9099768	RLOC_00002923	75	-	74.6	61.9	0.0591	0.64	205	235
1	9113866	9114994	RLOC_00002928	5	+	4.6	-1.4	0.876	1	110	207
1	9143923	9146106	RLOC_00002939	14	-	13.7	10.2	0.246	0.746	268	437
1	9148580	9150250	RLOC_00002940	22	-	22.5	4.8	0.173	0.688	56	90
1	9151627	9154762	RLOC_00002941	44	+	43.9	40.9	0.172	0.688	125	235
1	9155090	9156370	RLOC_00002942	4	+	3.7	2.6	0.698	1	203	360
1	9163175	9165919	RLOC_00002949	61	-	60.8	57.5	0.116	0.647	51	89
1	9171127	9173064	RLOC_00002952	3	+	2.9	1.0	0.494	0.942	1121	2147
1	9178211	9181967	RLOC_00002954	37	+	37.3	35.5	0.537	0.968	119	175
1	9182007	9184393	RLOC_00002955	8	+	8.1	-6.6	0.771	1	35	79
1	9184566	9187578	RLOC_00002956	26	+	26.3	6.1	1	1	480	638
1	9195511	9199671	RLOC_00002960	122	-	122.1	121.7	1	1	79	129
1	9205827	9207458	RLOC_00002961	10	+	10.0	9.8	2.19e-25	1.28e-22	6725	11218
1	9207342	9209902	RLOC_00002962	22	-	22.3	-13.4	0.258	0.757	198	346
1	9210064	9214005	RLOC_00002963	235	+	234.6	226.4	1	1	205	298
1	9214071	9215557	RLOC_00002964	2	+	2.0	1.8	0.168	0.685	436	783
1	9215769	9218010	RLOC_00002965	6	+	6.3	-2.0	0.779	1	292	513
1	9224058	9225792	RLOC_00002967	3	-	2.8	-2.3	0.84	1	174	386
1	9244952	9246633	RLOC_00002974	5	-	4.7	1.2	0.988	1	146	305
1	9246755	9248292	RLOC_00002975	12	+	11.5	-7.8	0.255	0.756	169	293
1	9250030	9251654	RLOC_00002978	7	-	7.1	4.8	0.487	0.938	168	182
1	9259431	9261313	RLOC_00002982	7	+	6.8	4.8	0.581	0.995	219	423
1	9284760	9286334	RLOC_00002991	12	-	12.1	-11.7	1	1	300	387
1	9292445	9293862	RLOC_00002995	31	-	30.5	26.7	0.0619	0.64	108	142
1	9295640	9300796	RLOC_00002996	24	+	23.6	20.2	0.56	0.984	270	418
1	9300805	9304328	RLOC_00002997	5	-	5.0	2.8	0.573	0.991	641	1050
1	9315304	9318277	RLOC_00003000	21	-	21.0	21.0	1	1	1263	2541
1	9321659	9324395	RLOC_00003004	28	+	28.4	17.7	0.406	0.878	148	245
1	9329383	9332148	RLOC_00003006	18	+	18.4	18.3	0.0552	0.64	430	612
1	9343113	9345323	RLOC_00003009	30	+	30.3	-28.2	0.194	0.705	68	131
1	9355826	9357502	RLOC_00003012	44	+	44.4	41.0	0.224	0.733	63	73
1	9373884	9376828	RLOC_00003016	21	+	20.8	3.0	1	1	343	667
1	9378403	9380790	RLOC_00003018	8	+	8.3	8.3	1	1	728	1978
1	9381526	9384060	RLOC_00003019	7	+	6.7	4.1	0.12	0.647	673	1112
1	9393674	9396858	RLOC_00003022	113	+	112.8	112.4	0.211	0.724	169	237
1	9396613	9399483	RLOC_00003023	79	-	79.5	-79.0	0.104	0.646	68	142
1	9403752	9406369	RLOC_00003025	7	-	6.7	-3.7	0.509	0.95	379	539
1	9407084	9411368	RLOC_00003026	326	-	326.2	-287.3	0.000564	0.0146	181	289
1	9425279	9426897	RLOC_00003030	8	+	8.3	8.3	3.48e-06	0.000161	1157	1842
1	9428991	9432307	RLOC_00003033	36	+	36.4	-16.6	0.374	0.856	138	222
1	9446596	9449046	RLOC_00003037	10	-	9.7	-8.9	0.181	0.695	362	580
1	9449293	9451777	RLOC_00003038	34	-	34.0	28.9	1	1	125	187
1	9455276	9458176	RLOC_00003040	18	-	18.3	17.9	0.00692	0.127	377	518
1	9481404	9482992	RLOC_00003053	7	+	7.4	7.4	1	1	1079	1336
1	9483127	9484686	RLOC_00003054	7	+	7.5	-7.2	1	1	407	534
1	9484315	9486002	RLOC_00003056	3	-	2.8	1.8	0.555	0.98	526	823
1	9486888	9492632	RLOC_00003057	14	+	14.2	-7.8	0.364	0.85	652	1001
1	9492848	9494382	RLOC_00003058	4	+	3.9	-3.5	0.252	0.753	743	1549
1	9495343	9498085	RLOC_00003059	11	+	10.7	8.5	0.76	1	167	236
1	9497999	9499639	RLOC_00003060	2	-	1.9	1.0	0.497	0.944	556	1103
1	9505111	9508542	RLOC_00003062	54	-	53.7	-42.6	0.529	0.961	102	135
1	9508679	9512860	RLOC_00003063	33	-	33.3	-31.8	0.246	0.747	283	567
1	9513080	9515050	RLOC_00003064	35	-	34.7	17.6	1	1	274	434
1	9515113	9517070	RLOC_00003065	3	+	2.9	1.8	0.541	0.971	1560	2748
1	9527455	9528866	RLOC_00003069	6	-	6.5	0.2	0.337	0.827	409	713
1	9528966	9531489	RLOC_00003070	9	-	9.3	-1.6	0.867	1	94	129
1	9531808	9534141	RLOC_00003071	6	+	6.2	2.8	0.141	0.664	901	1827
1	9534499	9537728	RLOC_00003072	62	+	62.4	-59.2	0.181	0.695	79	145
1	9544409	9546285	RLOC_00003075	33	+	33.0	-18.5	0.263	0.762	118	158
1	9551450	9554422	RLOC_00003077	47	-	47.0	37.5	0.555	0.98	52	72
1	9554709	9558461	RLOC_00003078	45	-	45.2	7.5	0.31	0.803	149	199
1	9558561	9562485	RLOC_00003079	33	+	32.9	30.5	0.653	1	175	240
1	9562486	9564031	RLOC_00003080	2	-	2.3	1.3	0.144	0.664	692	1182
1	9565857	9567906	RLOC_00003082	26	-	26.2	19.6	0.158	0.674	268	396
1	9592092	9603548	RLOC_00003091	1115	+	1115.0	1109.1	1	1	121	213
1	9614550	9616574	RLOC_00003097	10	+	10.0	4.4	1	1	472	660
1	9627532	9628749	RLOC_00003099	27	-	27.3	-27.2	0.0516	0.64	47	45
1	9636587	9640225	RLOC_00003102	12	+	12.2	-7.6	0.936	1	340	516
1	9648020	9649323	RLOC_00003106	5	-	5.2	0.3	0.302	0.794	229	579
1	9657172	9661994	RLOC_00003108	109	+	109.3	-102.5	0.0962	0.64	108	178
1	9662020	9667595	RLOC_00003109	163	+	162.5	77.2	0.422	0.892	77	112
1	9668507	9671657	RLOC_00003110	15	+	14.9	14.8	1	1	619	960
1	9671631	9676307	RLOC_00003111	50	-	50.2	50.1	1	1	273	553
1	9692975	9696546	RLOC_00003118	21	-	20.8	-16.7	0.878	1	89	177
1	9698297	9704013	RLOC_00003119	64	+	63.9	-39.1	0.395	0.87	130	241
1	9715348	9720620	RLOC_00003124	64	-	64.1	13.9	0.747	1	79	124
1	9720727	9724800	RLOC_00003125	45	-	45.0	45.0	0.702	1	75	157
1	9726606	9733000	RLOC_00003126	156	-	155.8	-147.0	0.264	0.764	377	475
1	9740583	9742497	RLOC_00003129	40	+	40.2	-40.2	3.87e-05	0.00141	742	1282
1	9746708	9752775	RLOC_00003131	44	+	43.7	43.5	0.501	0.947	1090	1923
1	9763210	9768157	RLOC_00003136	366	+	366.3	-364.0	1	1	57	103
1	9775521	9778043	RLOC_00003140	32	-	31.5	-4.3	0.11	0.647	57	103
1	9778850	9784069	RLOC_00003141	80	+	80.5	77.9	0.447	0.907	157	258
1	9795717	9799118	RLOC_00003143	21	+	21.0	-9.9	0.795	1	61	116
1	9800346	9804555	RLOC_00003145	153	+	153.2	-153.1	1	1	114	164
1	9803063	9806887	RLOC_00003147	54	-	53.6	-53.0	0.0962	0.64	137	266
1	9812929	9815565	RLOC_00003148	13	-	13.3	6.4	0.717	1	269	446
1	9825270	9828528	RLOC_00003149	11	+	10.8	-6.6	0.834	1	156	153
1	9829137	9834487	RLOC_00003150	18	-	17.6	-17.5	1	1	651	1244
1	9834641	9836210	RLOC_00003152	2	-	2.3	0.8	0.0643	0.64	833	1531
1	9846746	9848015	RLOC_00003156	3	-	3.5	2.8	0.648	1	84	212
1	9849843	9852449	RLOC_00003158	27	-	27.5	27.0	0.251	0.753	158	303
1	9862040	9864779	RLOC_00003161	22	-	22.0	22.0	1	1	91	190
1	9868199	9872250	RLOC_00003162	140	-	139.9	-126.7	0.00549	0.105	158	244
1	9874202	9875615	RLOC_00003163	9	+	8.8	7.9	0.573	0.991	143	251
1	9875466	9879433	RLOC_00003164	168	-	167.7	-162.6	0.00875	0.158	189	211
1	9884274	9887666	RLOC_00003168	10	-	9.9	8.8	0.182	0.696	344	562
1	9889100	9891015	RLOC_00003169	2	-	2.1	0.8	0.0786	0.64	2278	3507
1	9911796	9913957	RLOC_00003173	89	-	89.4	-78.4	0.0284	0.438	120	170
1	9920144	9924484	RLOC_00003174	28	-	27.9	5.8	0.627	1	128	216
1	9933732	9935440	RLOC_00003177	2	-	2.0	1.6	0.519	0.954	2568	2978
1	9940000	9943661	RLOC_00003180	18	+	18.3	-17.1	0.0485	0.64	318	486
1	9943736	9949853	RLOC_00003181	451	+	450.8	450.8	0.0857	0.64	40	59
1	9955773	9956960	RLOC_00003183	22	-	21.5	-2.6	0.438	0.9	60	170
1	9963447	9966320	RLOC_00003185	44	+	44.3	43.5	0.189	0.702	74	228
1	9969309	9973893	RLOC_00003188	144	-	144.1	144.0	0.157	0.673	348	561
1	9976140	9979793	RLOC_00003189	26	-	26.2	-21.4	0.266	0.766	169	339
1	9979477	9987737	RLOC_00003190	95	+	94.8	-60.7	0.681	1	172	269
1	9996712	10000455	RLOC_00003193	9	+	9.3	9.0	1	1	277	469
1	10015898	10018160	RLOC_00003202	15	+	15.1	0.8	0.796	1	86	186
1	10023816	10026311	RLOC_00003204	20	+	19.7	14.7	0.737	1	97	175
1	10029062	10032032	RLOC_00003205	31	+	31.5	30.4	1	1	378	532
1	10031935	10036041	RLOC_00003206	84	-	83.5	57.3	0.279	0.777	59	108
1	10035666	10037662	RLOC_00003207	5	+	4.7	3.2	0.794	1	145	262
1	10044336	10046552	RLOC_00003211	15	-	15.1	-8.0	0.212	0.724	345	681
1	10050936	10053218	RLOC_00003214	143	-	143.0	-116.3	0.000319	0.0087	182	223
1	10071608	10073584	RLOC_00003220	4	-	4.0	-3.1	0.425	0.894	265	451
1	10074358	10076457	RLOC_00003221	19	-	18.9	-18.8	0.00334	0.069	371	490
1	10078196	10081681	RLOC_00003223	12	+	12.1	-11.1	0.0777	0.64	323	550
1	10086358	10095222	RLOC_00003226	483	-	482.8	-478.5	1	1	88	110
1	10095812	10102928	RLOC_00003238	1139	-	1139.0	-1139.0	0.0065	0.121	46	76
1	10105024	10111744	RLOC_00003251	441	-	441.4	-423.6	1	1	213	352
1	10124285	10127098	RLOC_00003263	26	-	26.4	16.6	0.139	0.663	102	158
1	10134055	10136241	RLOC_00003267	3	+	3.4	-3.2	0.929	1	392	788
1	10136130	10139176	RLOC_00003270	24	-	23.6	-21.4	0.0657	0.64	576	1041
1	10147604	10151539	RLOC_00003272	27	+	26.6	25.0	1	1	2643	4312
1	10174186	10178521	RLOC_00003280	47	+	46.5	45.1	0.176	0.689	272	420
1	10180301	10182808	RLOC_00003282	11	+	10.8	10.6	1	1	874	1434
1	10183389	10184512	RLOC_00003283	13	-	12.6	-2.1	0.518	0.954	40	101
1	10190136	10195213	RLOC_00003284	301	-	300.8	273.2	0.434	0.899	26	41
1	10210182	10212722	RLOC_00003290	30	-	29.5	3.0	0.804	1	49	71
1	10223176	10224720	RLOC_00003293	10	-	10.1	0.9	0.202	0.716	275	507
1	10224814	10226322	RLOC_00003294	9	+	8.9	5.6	0.21	0.724	255	408
1	10229807	10231384	RLOC_00003295	23	+	23.4	-17.5	0.704	1	74	95
1	10236336	10237990	RLOC_00003296	10	+	9.8	4.8	0.708	1	283	410
1	10252240	10254792	RLOC_00003299	19	+	18.5	-13.7	0.401	0.874	133	291
1	10255250	10258440	RLOC_00003300	26	+	26.0	-11.4	0.644	1	89	138
1	10258212	10261232	RLOC_00003301	12	-	12.3	-3.4	0.693	1	88	181
1	10264042	10266917	RLOC_00003302	25	+	24.8	24.6	1	1	178	323
1	10286066	10288103	RLOC_00003309	12	-	12.0	3.1	0.139	0.663	173	273
1	10288128	10289666	RLOC_00003310	6	-	5.8	4.2	0.288	0.783	614	735
1	10289981	10294630	RLOC_00003311	5	-	5.0	2.8	0.723	1	879	1312
1	10297749	10300073	RLOC_00003312	91	-	91.4	42.9	0.245	0.746	63	103
1	10300200	10301457	RLOC_00003314	35	+	34.7	-29.8	0.129	0.653	372	813
1	10301376	10302099	RLOC_00003315	9	-	9.1	4.8	0.953	1	68	59
1	10302178	10303389	RLOC_00003317	11	-	11.3	8.7	0.329	0.822	213	177
1	10304269	10305348	RLOC_00003319	12	-	11.8	10.2	1	1	171	165
1	10305515	10306951	RLOC_00003320	11	-	11.5	-1.9	0.815	1	142	145
1	10307351	10308246	RLOC_00003321	13	-	12.8	-11.2	0.0683	0.64	182	196
1	10308519	10309896	RLOC_00003322	88	+	87.5	-84.0	1	1	288	454
1	10310130	10314147	RLOC_00003327	4	-	4.3	3.8	0.177	0.689	1028	1723
1	10320988	10321968	RLOC_00003331	3	+	3.2	-2.6	0.881	1	334	371
1	10322516	10324836	RLOC_00003332	146	+	146.2	146.2	1	1	325	381
1	10323339	10326817	RLOC_00003333	35	-	35.3	-35.0	0.106	0.646	141	183
1	10371674	10374005	RLOC_00003346	18	+	18.0	18.0	0.0829	0.64	354	619
1	10375650	10377908	RLOC_00003347	5	+	5.4	-5.3	0.352	0.839	567	1300
1	10378979	10382153	RLOC_00003349	29	-	28.6	28.5	0.154	0.668	161	324
1	10384929	10387669	RLOC_00003351	29	-	28.7	-1.4	0.0944	0.64	142	274
1	10413852	10420774	RLOC_00003356	160	-	159.7	-159.5	0.361	0.848	92	156
1	10422291	10425801	RLOC_00003357	20	+	19.6	-2.3	0.109	0.647	130	166
1	10429818	10432271	RLOC_00003360	12	+	11.9	11.7	1	1	213	336
1	10432600	10435482	RLOC_00003361	25	+	24.8	-20.6	0.839	1	73	112
1	10435213	10437770	RLOC_00003362	36	-	35.7	27.3	0.0901	0.64	140	238
1	10447346	10449969	RLOC_00003366	37	+	36.5	25.8	0.091	0.64	188	386
1	10459382	10462938	RLOC_00003369	18	-	17.7	-6.9	0.209	0.722	221	338
1	10463098	10467626	RLOC_00003370	80	+	80.3	-65.4	0.324	0.817	75	158
1	10468010	10473420	RLOC_00003371	21	+	21.2	-21.1	0.22	0.73	286	447
1	10472185	10473502	RLOC_00003372	1	-	0.9	-0.8	1	1	34863	58037
1	10474112	10475997	RLOC_00003373	2	-	1.6	1.0	1	1	36628	56325
1	10477856	10479218	RLOC_00003374	0	+	0.1	0.1	1	1	58662	86283
1	10491556	10494603	RLOC_00003378	20	+	20.0	-5.0	0.367	0.852	267	383
1	10494626	10496205	RLOC_00003379	33	+	33.5	32.4	0.138	0.663	38	67
1	10498178	10501498	RLOC_00003381	87	-	86.8	84.7	1	1	557	866
1	10503238	10506189	RLOC_00003382	35	-	35.0	11.8	0.486	0.938	97	159
1	10507532	10509160	RLOC_00003383	4	+	4.1	3.0	0.585	0.999	390	700
1	10509150	10512558	RLOC_00003384	42	-	41.5	-40.2	0.319	0.812	94	197
1	10513178	10516552	RLOC_00003385	25	+	24.6	22.2	0.868	1	52	60
1	10546420	10548221	RLOC_00003391	11	-	11.2	-6.2	0.906	1	98	129
1	10559495	10561545	RLOC_00003393	15	-	15.3	-3.7	0.459	0.918	125	190
1	10581734	10584152	RLOC_00003395	18	+	17.7	-13.9	0.209	0.723	166	235
1	10587470	10590209	RLOC_00003397	37	+	37.4	27.3	1	1	166	223
1	10624993	10627176	RLOC_00003406	6	+	6.3	-3.8	0.494	0.942	366	444
1	10626649	10630630	RLOC_00003407	78	-	78.0	-78.0	0.11	0.647	120	204
1	10638877	10640963	RLOC_00003409	3	+	2.9	1.0	0.0549	0.64	1725	2698
1	10650913	10651829	RLOC_00003412	8	+	7.7	-6.2	0.7	1	123	126
1	10654799	10658924	RLOC_00003413	8	+	8.3	-4.4	0.806	1	360	488
1	10680068	10683137	RLOC_00003421	38	+	37.9	-31.7	0.0981	0.64	156	300
1	10685821	10690988	RLOC_00003422	41	-	40.7	38.8	0.159	0.674	319	467
1	10715481	10718997	RLOC_00003425	12	+	11.9	-6.6	0.1	0.642	640	814
1	10722172	10725016	RLOC_00003427	1	+	1.0	0.1	1	1	32641	53929
1	10727316	10738108	RLOC_00003428	155	+	155.4	152.8	0.000762	0.0193	662	1032
1	10738682	10747563	RLOC_00003429	107	+	106.7	-103.0	0.571	0.99	156	187
1	10762707	10770958	RLOC_00003433	282	+	281.6	-280.7	0.0175	0.29	105	152
1	10779144	10786810	RLOC_00003437	154	+	153.9	153.1	0.202	0.716	153	273
1	10788202	10790241	RLOC_00003439	89	-	88.6	-81.8	0.0535	0.64	86	127
1	10789697	10792725	RLOC_00003440	14	+	14.4	0.2	0.19	0.702	108	175
1	10796123	10801093	RLOC_00003441	54	-	54.3	-31.0	0.632	1	65	88
1	10803627	10806317	RLOC_00003442	14	-	13.9	10.5	0.155	0.669	394	478
1	10806925	10809189	RLOC_00003443	10	-	9.9	1.3	0.124	0.647	238	429
1	10814611	10816615	RLOC_00003447	14	+	14.1	14.0	0.337	0.827	211	554
1	10816615	10819421	RLOC_00003448	19	-	19.3	-17.2	0.579	0.994	154	233
1	10828372	10831656	RLOC_00003452	46	+	46.4	-42.7	0.462	0.92	99	114
1	10829312	10840845	RLOC_00003453	13	-	12.6	-6.3	0.976	1	873	1463
1	10841106	10845242	RLOC_00003454	100	-	100.5	100.5	0.394	0.869	67	118
1	10854548	10858322	RLOC_00003456	45	+	44.6	7.3	0.748	1	62	137
1	10858174	10860280	RLOC_00003457	6	-	5.5	-2.3	0.121	0.647	653	1124
1	10887606	10890407	RLOC_00003463	12	+	11.8	11.8	1	1	188	282
1	10904774	10905724	RLOC_00003469	7	-	6.5	-5.8	0.118	0.647	99	110
1	10944890	10949485	RLOC_00003483	28	-	27.7	13.8	0.558	0.983	298	374
1	10960907	10963252	RLOC_00003485	29	+	29.3	20.9	0.628	1	47	68
1	10966889	10968949	RLOC_00003487	121	+	121.2	120.3	1	1	118	178
1	10991291	10994209	RLOC_00003493	2	-	2.1	0.9	0.98	1	1009	1382
1	10991477	10993083	RLOC_00003494	6	+	6.1	-5.4	0.776	1	161	203
1	10994242	10996223	RLOC_00003495	42	+	42.4	22.5	8.48e-05	0.00274	168	264
1	11000883	11003618	RLOC_00003497	16	+	15.5	-14.5	1	1	151	251
1	11040249	11043773	RLOC_00003510	44	-	43.8	43.8	0.134	0.659	170	230
1	11057104	11059037	RLOC_00003517	17	+	17.4	-4.6	0.694	1	107	171
1	11069227	11072311	RLOC_00003520	77	-	77.1	-40.4	0.286	0.782	76	77
1	11084665	11088628	RLOC_00003522	41	+	40.9	-38.5	0.816	1	98	159
1	11104225	11108128	RLOC_00003531	30	-	29.7	29.4	0.759	1	192	230
1	11114692	11116195	RLOC_00003532	9	-	9.0	4.2	0.561	0.984	129	174
1	11122585	11124258	RLOC_00003535	6	-	5.7	-5.0	0.219	0.729	309	539
1	11133409	11135302	RLOC_00003538	18	+	18.1	-16.5	1	1	735	1319
1	11137239	11142726	RLOC_00003540	819	+	819.0	-818.7	0.000643	0.0166	145	290
1	11142460	11144725	RLOC_00003542	7	-	6.5	5.0	0.619	1	151	327
1	11144743	11147628	RLOC_00003543	27	+	26.8	-12.9	0.195	0.706	214	323
1	11158539	11163470	RLOC_00003547	138	-	138.1	-138.0	0.0341	0.522	123	192
1	11170917	11172090	RLOC_00003554	9	+	9.5	9.5	1	1	158	257
1	11188119	11192585	RLOC_00003559	141	+	141.4	123.5	0.598	1	32	36
1	11193345	11196426	RLOC_00003560	14	+	14.3	9.3	0.497	0.945	295	449
1	11214675	11216141	RLOC_00003564	1	-	0.9	0.7	1	1	38537	60705
1	11216809	11217546	RLOC_00003565	2	-	2.1	1.1	0.0961	0.64	169	271
1	11217694	11219618	RLOC_00003566	10	-	9.8	9.5	1	1	340	526
1	11246816	11249587	RLOC_00003575	62	-	61.7	61.1	1	1	129	216
1	11249617	11253944	RLOC_00003576	7	+	6.9	6.8	0.329	0.822	830	1427
1	11255807	11258832	RLOC_00003578	6	-	5.6	-5.3	0.847	1	137	129
1	11265863	11273315	RLOC_00003581	181	+	181.4	179.6	0.212	0.724	132	212
1	11288356	11293802	RLOC_00003587	1100	-	1100.5	-1100.4	3.9e-09	3.78e-07	140	360
1	11310782	11312132	RLOC_00003593	10	+	9.7	9.4	0.234	0.741	176	593
1	11312960	11316582	RLOC_00003594	23	-	22.6	0.7	0.745	1	151	218
1	11330923	11333540	RLOC_00003599	18	-	18.2	-14.7	0.494	0.942	141	286
1	11349696	11355587	RLOC_00003602	306	+	306.3	-305.9	0.0968	0.64	98	158
1	11356075	11365098	RLOC_00003603	111	+	111.3	-104.2	0.0974	0.64	334	558
1	11372393	11374301	RLOC_00003606	46	-	46.2	45.3	0.225	0.734	43	86
1	11374759	11377885	RLOC_00003607	70	-	69.7	-61.8	0.14	0.664	116	149
1	11396142	11399779	RLOC_00003611	36	+	35.9	29.9	0.0965	0.64	373	654
1	11399606	11406809	RLOC_00003612	465	-	464.7	464.7	1	1	57	71
1	11410430	11414517	RLOC_00003613	3	-	3.0	0.4	0.213	0.724	6066	8714
1	11414694	11416444	RLOC_00003614	20	-	20.3	-2.1	0.119	0.647	146	275
1	11416445	11420998	RLOC_00003615	23	-	23.2	17.5	0.91	1	298	551
1	11434059	11436607	RLOC_00003619	27	-	27.3	-21.6	0.61	1	229	415
1	11436718	11440275	RLOC_00003620	25	+	25.4	-19.0	0.979	1	85	121
1	11453577	11455684	RLOC_00003622	270	+	270.4	-242.5	0.0141	0.24	73	67
1	11454020	11455254	RLOC_00003623	5	-	5.0	-1.7	0.508	0.949	541	795
1	11456801	11463896	RLOC_00003624	50	+	50.1	-50.0	1	1	592	1076
1	11464933	11469207	RLOC_00003626	46	+	46.3	45.5	0.0817	0.64	158	257
1	11469456	11470047	RLOC_00003627	5	+	4.5	-4.2	1	1	173	279
1	11469984	11471462	RLOC_00003628	19	-	18.8	10.4	1	1	183	208
1	11528384	11531350	RLOC_00003651	13	+	12.9	11.3	1	1	639	1004
1	11532107	11534745	RLOC_00003652	1	+	1.4	-0.9	0.0924	0.64	6698	10064
1	11534157	11536435	RLOC_00003653	11	-	11.1	10.8	0.052	0.64	600	1001
1	11537241	11539896	RLOC_00003654	8	-	7.7	7.1	0.528	0.961	284	432
1	11539987	11544166	RLOC_00003655	19	-	19.0	-4.4	0.925	1	97	160
1	11546159	11548016	RLOC_00003656	39	-	38.6	-37.5	0.085	0.64	86	126
1	11558617	11561920	RLOC_00003660	9	-	9.2	-0.1	0.735	1	243	382
1	11565511	11570454	RLOC_00003662	14	+	14.3	7.6	0.846	1	542	911
1	11592922	11596056	RLOC_00003666	113	-	112.8	-109.8	0.153	0.668	85	90
1	11601670	11605174	RLOC_00003669	55	-	55.3	-53.9	0.145	0.664	149	227
1	11605605	11607866	RLOC_00003670	6	-	5.7	1.7	0.494	0.942	569	990
1	11607862	11610074	RLOC_00003671	6	+	6.2	-6.2	0.171	0.687	448	664
1	11611927	11617419	RLOC_00003673	28	+	28.2	20.4	0.0058	0.109	1410	2081
1	11640544	11641966	RLOC_00003676	17	-	17.2	16.9	1	1	170	283
1	11653499	11654833	RLOC_00003680	8	+	8.0	-7.5	0.557	0.981	151	266
1	11656959	11660468	RLOC_00003682	43	-	43.0	-28.2	0.908	1	52	88
1	11676944	11680862	RLOC_00003689	77	+	77.4	-68.0	1	1	209	260
1	11684616	11686099	RLOC_00003692	39	+	39.2	-35.7	0.135	0.662	90	179
1	11689063	11691588	RLOC_00003695	6	-	6.2	-3.1	0.241	0.746	476	745
1	11712054	11716431	RLOC_00003701	39	+	38.8	-0.2	0.836	1	67	109
1	11715078	11719963	RLOC_00003702	23	-	22.8	-22.0	1	1	1727	1809
1	11738156	11739386	RLOC_00003703	2	+	2.3	2.3	1.95e-06	0.0001	2203	3414
1	11738296	11740435	RLOC_00003704	3	-	2.5	-1.9	1	1	1934	3069
1	11742023	11754385	RLOC_00003706	96	-	96.0	89.8	0.721	1	425	609
1	11757098	11762650	RLOC_00003709	37	-	37.4	15.2	0.231	0.739	477	771
1	11767395	11770049	RLOC_00003710	20	+	19.6	-16.2	0.164	0.68	270	441
1	11771620	11774294	RLOC_00003711	20	-	20.3	-17.6	0.595	1	180	302
1	11783542	11785704	RLOC_00003716	14	+	13.9	13.9	1	1	361	609
1	11798118	11801407	RLOC_00003723	15	-	14.9	-3.8	1	1	714	1261
1	11820871	11821824	RLOC_00003728	6	-	5.8	-5.7	1	1	183	272
1	11827358	11829933	RLOC_00003729	26	+	25.6	19.6	1.76e-09	1.81e-07	1001	1391
1	11844659	11846356	RLOC_00003734	31	+	31.0	27.6	0.653	1	49	57
1	11846134	11856752	RLOC_00003735	772	-	771.8	-768.2	0.0396	0.598	62	93
1	11869789	11877555	RLOC_00003740	117	-	117.4	116.9	0.01	0.179	1247	1994
1	11881310	11886099	RLOC_00003742	51	+	51.0	-45.0	0.0954	0.64	134	223
1	11920337	11923827	RLOC_00003751	21	-	20.8	-19.6	0.545	0.973	238	333
1	11931148	11931801	RLOC_00003756	3	+	2.5	-0.9	0.923	1	219	285
1	11931783	11934737	RLOC_00003757	82	-	81.7	-74.4	0.136	0.662	48	92
1	11955655	11957402	RLOC_00003764	3	+	2.9	2.7	0.252	0.755	630	923
1	11966480	11968004	RLOC_00003769	6	+	6.2	5.5	0.188	0.702	304	585
1	11967782	11972669	RLOC_00003770	191	-	191.1	-191.0	0.0781	0.64	475	740
1	11975282	11978623	RLOC_00003771	20	-	20.1	-7.5	0.895	1	102	149
1	11985649	11990520	RLOC_00003773	1126	+	1126.3	-1125.7	1	1	42	89
1	12002237	12003005	RLOC_00003776	23	-	23.4	23.4	1	1	68	104
1	12004852	12008880	RLOC_00003777	133	+	133.5	-133.3	0.00234	0.0506	423	562
1	12010878	12012547	RLOC_00003778	2	+	2.0	-1.6	0.322	0.816	706	1179
1	12023224	12024783	RLOC_00003781	2	+	2.3	2.3	0.000997	0.0245	2233	4090
1	12046378	12050095	RLOC_00003789	38	+	38.2	-8.6	0.122	0.647	163	241
1	12050712	12054811	RLOC_00003790	1551	-	1550.7	-1550.7	1.62e-12	3.02e-10	137	432
1	12057197	12059792	RLOC_00003793	8	-	8.2	7.9	0.137	0.663	167	312
1	12066594	12068101	RLOC_00003795	8	+	8.1	1.3	0.839	1	150	255
1	12068035	12070455	RLOC_00003796	49	-	48.5	-47.9	0.0669	0.64	122	214
1	12074098	12076289	RLOC_00003798	5	+	5.4	-1.3	0.802	1	178	281
1	12084905	12088993	RLOC_00003802	370	+	369.8	-362.9	0.0152	0.255	112	97
1	12089815	12096055	RLOC_00003805	35	+	35.4	-23.0	0.432	0.898	146	164
1	12095805	12096495	RLOC_00003806	25	-	24.6	-24.6	1	1	69	88
1	12104688	12109535	RLOC_00003811	61	-	61.1	-42.8	0.945	1	43	61
1	12144433	12147247	RLOC_00003819	12	+	12.2	11.8	1	1	371	536
1	12150666	12152460	RLOC_00003822	18	-	18.3	-17.8	0.00376	0.077	244	363
1	12157053	12159125	RLOC_00003825	12	-	11.8	7.9	0.0123	0.212	192	247
1	12168767	12172119	RLOC_00003829	24	+	23.7	-9.8	0.739	1	92	193
1	12177672	12179628	RLOC_00003832	6	+	5.9	-1.9	1	1	1298	1473
1	12180482	12184528	RLOC_00003833	219	+	219.5	-6.4	5.74e-05	0.00197	90	96
1	12188677	12190461	RLOC_00003836	5	+	4.8	0.6	0.67	1	50	49
1	12203929	12208769	RLOC_00003842	13	+	12.9	-7.3	0.603	1	333	502
1	12208307	12214313	RLOC_00003843	154	-	154.0	-153.5	0.344	0.832	79	113
1	12244559	12246231	RLOC_00003855	7	-	7.2	-2.3	1	1	816	1229
1	12261164	12262750	RLOC_00003858	2	+	2.4	2.2	0.158	0.674	228	261
1	12264941	12266920	RLOC_00003859	5	+	5.0	-3.2	0.855	1	217	355
1	12267840	12269978	RLOC_00003860	28	+	28.2	-23.1	1	1	721	1265
1	12349290	12351318	RLOC_00003882	5	-	5.1	-1.3	0.233	0.741	467	749
1	12351561	12355173	RLOC_00003883	12	+	12.4	10.7	1	1	215	295
1	12355541	12359228	RLOC_00003884	6	+	6.0	-1.4	0.746	1	615	1065
1	12357697	12359014	RLOC_00003885	2	-	1.7	-1.6	1	1	2112	3226
1	12359453	12361313	RLOC_00003886	27	-	26.7	26.6	0.279	0.777	68	103
1	12366829	12370046	RLOC_00003889	40	+	40.5	-12.0	0.377	0.859	121	200
1	12369953	12371547	RLOC_00003890	3	-	3.2	3.1	1	1	1188	2113
1	12396411	12401036	RLOC_00003903	151	-	151.3	-129.8	0.145	0.664	177	213
1	12417011	12421792	RLOC_00003910	84	-	83.9	-77.4	0.188	0.702	98	168
1	12426690	12429742	RLOC_00003911	82	+	82.3	-73.7	0.226	0.734	58	113
1	12429845	12433236	RLOC_00003912	12	+	11.8	10.1	0.981	1	121	261
1	12451428	12454692	RLOC_00003918	8	+	7.7	4.0	0.517	0.954	332	646
1	12455668	12457639	RLOC_00003919	50	+	50.3	-50.2	1	1	92	133
1	12458589	12463338	RLOC_00003920	64	+	64.3	58.8	0.228	0.738	138	236
1	12485314	12492207	RLOC_00003926	72	+	72.4	-46.4	0.483	0.935	98	151
1	12492320	12494589	RLOC_00003927	25	-	24.8	-12.7	0.748	1	41	76
1	12503359	12506177	RLOC_00003930	30	+	30.2	22.0	0.168	0.685	112	205
1	12513935	12517021	RLOC_00003933	139	-	139.0	-97.6	0.15	0.665	79	112
1	12520058	12524395	RLOC_00003935	28	+	27.8	27.3	0.381	0.862	237	395
1	12534394	12536158	RLOC_00003938	15	+	15.0	-5.1	0.36	0.846	112	248
1	12550338	12552674	RLOC_00003941	5	+	5.4	5.1	1	1	212	348
1	12582129	12582822	RLOC_00003949	2	+	2.3	2.2	1	1	451	733
1	12584277	12590228	RLOC_00003950	25	-	25.3	-12.7	0.338	0.829	492	651
1	12595109	12607157	RLOC_00003953	278	+	278.2	-271.0	0.201	0.715	110	183
1	12646650	12652646	RLOC_00003966	80	-	80.1	-79.6	0.137	0.663	150	255
1	12654926	12656605	RLOC_00003968	44	-	43.9	-21.7	0.22	0.729	89	178
1	12685197	12688503	RLOC_00003975	68	+	68.3	-65.0	0.241	0.746	81	123
1	12686805	12688560	RLOC_00003976	6	-	6.4	-3.2	0.18	0.694	363	658
1	12735999	12738879	RLOC_00003987	27	-	26.9	26.8	0.235	0.741	183	397
1	12746404	12748636	RLOC_00003989	51	+	50.6	-39.5	0.211	0.724	50	91
1	12748550	12750513	RLOC_00003990	14	-	14.3	13.7	0.0712	0.64	89	138
1	12851982	12853235	RLOC_00004036	5	+	5.2	5.1	0.488	0.939	196	375
1	12867080	12868890	RLOC_00004040	17	+	16.5	16.5	5.18e-11	7.23e-09	777	1063
1	12890403	12892955	RLOC_00004048	10	+	9.6	5.8	0.893	1	170	328
1	12896581	12897675	RLOC_00004050	50	-	50.0	43.2	1	1	34	70
1	12908847	12914858	RLOC_00004053	589	+	589.3	-581.8	0.0656	0.64	48	64
1	12958840	12962853	RLOC_00004068	300	-	299.9	295.3	0.0578	0.64	57	99
1	12977667	12979948	RLOC_00004072	5	+	5.5	-2.0	0.503	0.947	494	743
1	12980688	12984820	RLOC_00004073	27	-	26.7	-13.4	0.343	0.832	263	408
1	13026205	13027725	RLOC_00004088	5	+	5.5	-0.4	0.685	1	165	258
1	13030552	13031375	RLOC_00004090	15	-	15.2	-13.2	0.0896	0.64	115	196
1	13039659	13042172	RLOC_00004094	26	+	26.4	26.4	1	1	248	351
1	13051156	13055093	RLOC_00004098	20	-	19.6	2.9	0.926	1	124	169
1	13071163	13074984	RLOC_00004103	115	+	114.6	-108.4	0.179	0.692	73	138
1	13077825	13080265	RLOC_00004105	13	+	13.3	-6.8	0.0551	0.64	1306	1744
1	13115697	13117423	RLOC_00004114	19	-	19.5	12.6	0.348	0.836	101	144
1	13122081	13125328	RLOC_00004116	7	-	6.8	6.8	1	1	1436	2218
1	13145598	13146870	RLOC_00004120	5	+	5.1	-0.4	0.319	0.811	355	424
1	13205344	13208289	RLOC_00004134	11	+	11.2	-6.0	0.635	1	240	359
1	13208707	13210465	RLOC_00004135	2	+	1.9	1.8	0.118	0.647	1906	3420
1	13225207	13227428	RLOC_00004140	9	+	8.8	8.1	1	1	950	1598
1	13277136	13280340	RLOC_00004149	56	-	56.0	55.9	1	1	150	235
1	13450131	13453683	RLOC_00004181	12	+	12.0	1.6	0.815	1	245	476
1	13454495	13456336	RLOC_00004182	5	-	5.0	2.1	0.72	1	298	469
1	13466675	13470936	RLOC_00004183	55	-	55.1	49.6	0.766	1	103	164
1	13533167	13544015	RLOC_00004200	145	+	145.5	-133.8	0.232	0.739	257	371
1	13640507	13643126	RLOC_00004216	18	+	17.7	-2.0	0.813	1	91	191
1	13671781	13674242	RLOC_00004222	3	+	2.9	1.8	0.305	0.798	821	1381
1	13696001	13698739	RLOC_00004228	17	-	16.9	16.9	1	1	1549	2088
1	13700764	13703654	RLOC_00004229	8	+	8.4	3.5	0.774	1	309	465
1	13700772	13703572	RLOC_00004230	16	-	15.9	-13.0	0.29	0.785	241	372
1	13898186	13900899	RLOC_00004279	5	-	5.0	4.7	1	1	1724	2717
1	14003865	14005502	RLOC_00004305	15	+	15.4	-14.7	0.924	1	75	105
1	14024633	14026951	RLOC_00004311	4	+	4.4	2.7	0.769	1	594	752
1	14158478	14161976	RLOC_00004342	5	+	5.1	4.9	1	1	2905	4708
1	15603537	15607955	RLOC_00004514	213	-	212.6	-212.5	0.051	0.64	117	210
1	15650526	15652542	RLOC_00004521	2	-	1.6	-1.3	0.764	1	1009	2020
1	15891280	15894640	RLOC_00004576	13	+	12.6	5.9	0.105	0.646	92	134
1	15895196	15900105	RLOC_00004577	29	-	28.9	25.9	0.808	1	112	190
1	15926226	15935489	RLOC_00004580	692	+	691.9	-673.4	1	1	76	100
1	15936155	15938994	RLOC_00004581	17	+	16.6	2.4	0.732	1	116	227
1	16125685	16129890	RLOC_00004628	25	+	24.9	24.8	0.066	0.64	9773	16325
1	16135629	16137550	RLOC_00004631	7	-	6.6	5.7	0.187	0.702	364	890
1	16228188	16231254	RLOC_00004646	64	-	63.9	-60.8	0.161	0.676	85	135
1	16266552	16268945	RLOC_00004652	6	+	5.6	1.4	1	1	1537	2695
1	16275036	16278726	RLOC_00004655	47	-	47.4	-30.5	0.156	0.671	175	235
1	16397978	16399880	RLOC_00004677	21	-	20.6	-20.6	1	1	357	541
1	16410371	16412736	RLOC_00004682	4	-	4.2	-4.1	0.687	1	319	453
1	16478141	16482880	RLOC_00004703	46	+	46.3	-39.7	0.261	0.761	182	325
1	16484211	16486327	RLOC_00004704	5	+	5.2	2.0	0.824	1	370	544
1	16486090	16488466	RLOC_00004705	10	-	10.4	-9.8	0.0807	0.64	403	577
1	16548416	16551909	RLOC_00004721	71	+	70.8	42.2	0.704	1	47	38
1	16575758	16576541	RLOC_00004728	7	+	7.3	-6.4	0.224	0.734	76	111
1	16577520	16579722	RLOC_00004729	2	+	1.9	1.4	0.783	1	716	1038
1	16616982	16622101	RLOC_00004738	27	+	27.2	-16.7	0.64	1	192	291
1	16620768	16624504	RLOC_00004739	71	-	70.7	46.0	0.0653	0.64	83	153
1	16637491	16645265	RLOC_00004743	697	-	696.8	-691.5	1	1	160	269
1	16646690	16648692	RLOC_00004745	4	+	4.2	2.4	1	1	734	1061
1	16654004	16656063	RLOC_00004748	7	+	7.0	3.8	0.377	0.859	166	240
1	16655883	16657686	RLOC_00004749	20	-	19.6	19.5	0.616	1	75	199
1	16708003	16709713	RLOC_00004760	3	-	2.5	-0.0	0.223	0.733	849	1513
1	16764371	16767704	RLOC_00004774	48	-	48.4	-41.0	1	1	371	739
1	16796393	16800321	RLOC_00004782	42	-	42.3	-37.5	0.161	0.676	223	389
1	16834209	16838562	RLOC_00004793	40	-	39.6	39.5	0.194	0.705	178	347
1	16848277	16851271	RLOC_00004796	9	-	9.5	-8.3	1	1	1959	2772
1	16870220	16873427	RLOC_00004801	5	+	5.0	4.6	3.07e-13	6.55e-11	5840	9658
1	16892526	16896167	RLOC_00004806	19	+	19.2	-6.8	0.438	0.901	242	370
1	16896651	16898645	RLOC_00004807	8	-	7.9	6.6	0.215	0.726	308	469
1	16907536	16909572	RLOC_00004808	5	-	5.0	1.5	0.862	1	435	640
1	16912125	16913641	RLOC_00004810	15	-	15.0	-14.6	0.0565	0.64	246	418
1	16913993	16917053	RLOC_00004811	33	-	32.7	-32.6	0.139	0.663	321	384
1	16923439	16924821	RLOC_00004812	5	+	4.8	4.1	0.142	0.664	333	498
1	16926296	16929196	RLOC_00004813	12	+	11.9	11.2	1	1	332	551
1	16939800	16942943	RLOC_00004815	37	+	37.3	32.9	0.127	0.651	135	212
1	16975627	16983038	RLOC_00004825	165	+	165.2	164.5	0.513	0.951	57	112
1	16982796	16984515	RLOC_00004826	11	-	10.6	-7.9	0.226	0.734	398	690
1	16999533	17001871	RLOC_00004832	10	+	10.2	2.3	0.8	1	135	263
1	17009072	17011953	RLOC_00004836	9	+	9.2	3.1	0.408	0.88	340	572
1	17031210	17033316	RLOC_00004844	13	+	13.1	0.5	0.738	1	140	239
1	17055084	17059972	RLOC_00004851	433	+	433.3	433.1	1	1	47	59
1	17065104	17069286	RLOC_00004852	30	+	30.0	29.2	0.187	0.702	262	380
1	17074941	17076417	RLOC_00004854	3	-	3.2	1.3	1	1	1300	3018
1	17077385	17082592	RLOC_00004855	34	-	34.3	-7.8	0.939	1	89	153
1	17082876	17091405	RLOC_00004856	365	-	364.5	360.2	0.101	0.642	428	672
1	17095979	17098041	RLOC_00004861	7	-	6.9	-3.2	0.958	1	146	237
1	17123825	17129705	RLOC_00004865	90	+	90.4	-90.2	0.000793	0.0199	827	1082
1	17152659	17155465	RLOC_00004876	15	+	15.1	12.5	0.864	1	69	82
1	17154845	17164792	RLOC_00004877	1956	-	1956.0	-1953.8	5.66e-05	0.00195	101	135
1	17165111	17167924	RLOC_00004884	42	-	41.8	-36.2	0.191	0.702	184	304
1	17169462	17171559	RLOC_00004885	7	-	6.5	5.4	0.83	1	351	516
1	17172120	17177060	RLOC_00004886	39	-	39.5	16.9	0.645	1	128	179
1	17179264	17183064	RLOC_00004888	56	+	56.5	-56.5	6.86e-10	7.58e-08	1079	1787
1	17199313	17200841	RLOC_00004896	21	+	21.1	20.7	1	1	157	225
1	17252877	17253937	RLOC_00004906	26	+	26.0	24.5	0.111	0.647	100	101
1	17265585	17266824	RLOC_00004909	40	-	40.0	38.0	0.0917	0.64	91	107
1	17275889	17277839	RLOC_00004913	12	-	11.9	-11.2	0.923	1	112	124
1	17282748	17285749	RLOC_00004915	6	-	5.8	5.6	1	1	4572	7585
1	17295569	17296326	RLOC_00004917	2	+	2.1	-1.5	0.691	1	139	224
1	17297708	17298832	RLOC_00004919	2	-	1.7	-0.1	0.605	1	539	905
1	17308734	17311467	RLOC_00004923	24	-	23.7	-20.5	0.956	1	55	114
1	17319118	17321202	RLOC_00004928	7	+	6.7	-6.1	0.726	1	258	491
1	17319550	17323484	RLOC_00004929	12	-	11.8	-8.0	0.1	0.642	412	712
1	17330818	17332336	RLOC_00004933	7	+	7.3	6.2	0.295	0.789	327	525
1	17335750	17339290	RLOC_00004935	39	+	39.0	16.2	0.678	1	100	105
1	17341737	17344836	RLOC_00004937	9	+	9.1	-7.9	0.224	0.734	187	345
1	17372370	17376091	RLOC_00004947	39	-	38.5	-38.3	0.541	0.971	64	97
1	17394071	17395673	RLOC_00004957	17	+	16.7	11.6	0.808	1	72	112
1	17395498	17397307	RLOC_00004958	3	-	2.6	2.6	1	1	1318	2372
1	17424472	17427475	RLOC_00004969	2	+	2.3	1.8	0.537	0.968	405	611
1	17443178	17446763	RLOC_00004975	11	+	11.2	7.7	0.752	1	54	67
1	17451516	17454461	RLOC_00004976	12	+	12.0	3.3	0.57	0.989	356	512
1	17477578	17483502	RLOC_00004982	222	+	222.1	221.6	0.353	0.839	91	157
1	17484283	17486585	RLOC_00004984	21	+	21.2	21.1	0.104	0.645	174	253
1	17491730	17494779	RLOC_00004987	22	+	22.1	13.3	0.326	0.818	98	162
1	17518046	17520129	RLOC_00004996	3	-	2.8	1.4	0.792	1	170	304
1	17536620	17539719	RLOC_00005001	15	-	15.3	8.4	0.869	1	83	120
1	17557090	17560331	RLOC_00005007	9	+	9.5	7.1	0.701	1	249	422
1	17560928	17562940	RLOC_00005008	19	-	18.6	-5.2	0.201	0.715	195	214
1	17566566	17570516	RLOC_00005010	38	+	38.1	-30.2	0.548	0.975	154	235
1	17569255	17570249	RLOC_00005011	2	-	2.5	0.3	0.449	0.908	99	207
1	17611904	17612613	RLOC_00005029	4	+	4.0	3.6	0.275	0.773	119	192
1	17613013	17614984	RLOC_00005030	6	-	6.3	-1.0	0.655	1	318	559
1	17647143	17651791	RLOC_00005037	65	-	65.1	-65.1	0.364	0.85	89	124
1	17675364	17683629	RLOC_00005044	306	-	305.6	301.5	0.00683	0.126	217	164
1	17686989	17688859	RLOC_00005045	7	+	6.7	6.0	0.631	1	210	259
1	17716151	17721891	RLOC_00005052	111	-	111.4	102.4	0.0742	0.64	251	416
1	17769883	17773524	RLOC_00005062	52	-	51.5	41.5	0.521	0.956	115	144
1	17773607	17780107	RLOC_00005063	238	-	238.3	236.3	0.419	0.889	49	82
1	17781987	17784211	RLOC_00005065	22	+	22.3	12.5	0.302	0.794	117	218
1	17786495	17789282	RLOC_00005068	10	-	9.8	-5.9	0.628	1	205	328
1	17788768	17792404	RLOC_00005069	199	+	199.1	-183.6	0.0839	0.64	182	343
1	17796151	17798335	RLOC_00005072	12	-	11.7	1.6	0.708	1	139	304
1	17798430	17802330	RLOC_00005074	22	+	22.5	15.0	0.849	1	95	243
1	17805760	17808993	RLOC_00005076	18	+	18.5	16.2	0.594	1	211	289
1	17808987	17812106	RLOC_00005077	44	-	44.2	35.2	0.105	0.646	144	220
1	17847032	17848898	RLOC_00005086	5	+	4.9	-2.0	0.0678	0.64	750	933
1	17847623	17853915	RLOC_00005087	51	-	50.6	31.6	0.943	1	57	78
1	17854811	17855959	RLOC_00005089	4	-	3.7	-3.5	1	1	416	727
1	17863659	17864558	RLOC_00005091	4	+	4.3	2.9	0.7	1	123	183
1	17867101	17868452	RLOC_00005093	1	+	1.4	0.1	0.484	0.935	1111	1796
1	17874442	17877524	RLOC_00005096	51	+	50.7	-47.4	0.203	0.717	71	141
1	17877410	17881310	RLOC_00005097	21	-	21.1	15.8	0.755	1	153	281
1	17886035	17892632	RLOC_00005100	21	-	20.5	4.2	0.58	0.995	562	638
1	17895783	17898813	RLOC_00005101	5	-	4.6	4.3	0.817	1	730	1426
1	17902620	17906873	RLOC_00005103	36	-	35.8	22.7	0.692	1	112	210
1	17906870	17908534	RLOC_00005104	4	+	3.6	-2.4	0.83	1	749	1384
1	17908452	17910523	RLOC_00005105	1	-	0.8	-0.3	0.914	1	741	1291
1	17910778	17913636	RLOC_00005106	27	+	26.7	-24.4	0.192	0.703	144	208
1	17917950	17921225	RLOC_00005108	28	+	27.7	25.9	0.141	0.664	104	258
1	17940049	17942867	RLOC_00005112	13	+	12.6	4.5	0.574	0.991	258	432
1	17949611	17952709	RLOC_00005115	43	-	43.5	31.2	0.232	0.739	81	168
1	17953869	17957719	RLOC_00005117	44	-	44.0	41.4	0.0614	0.64	102	144
1	17965870	17970608	RLOC_00005123	21	+	20.8	7.0	0.121	0.647	520	797
1	17970610	17973402	RLOC_00005125	48	-	48.0	47.6	0.204	0.719	113	180
1	17973641	17976663	RLOC_00005126	17	-	17.4	15.8	1	1	544	763
1	17981635	17983377	RLOC_00005128	14	-	13.5	13.4	1	1	90	161
1	17983533	17989163	RLOC_00005129	61	+	60.8	-31.4	0.622	1	140	194
1	18030705	18031608	RLOC_00005142	7	+	7.3	7.1	0.0934	0.64	165	181
1	18035854	18039399	RLOC_00005144	3	+	3.4	-0.0	0.268	0.767	678	1243
1	18035966	18039405	RLOC_00005145	22	-	22.3	-7.2	0.187	0.702	136	187
1	18040128	18042991	RLOC_00005146	23	+	23.4	4.1	0.934	1	71	92
1	18043671	18047806	RLOC_00005147	7	-	6.7	2.7	0.97	1	383	575
1	18059449	18061302	RLOC_00005151	8	-	8.4	5.1	2.57e-06	0.000127	1470	2621
1	18061355	18065051	RLOC_00005152	64	+	64.1	-61.0	0.0771	0.64	108	147
1	18064882	18068163	RLOC_00005153	14	-	14.3	5.2	0.816	1	185	392
1	18068664	18071648	RLOC_00005154	4	-	4.3	3.5	0.951	1	333	499
1	18098094	18101767	RLOC_00005162	4	+	3.9	1.1	0.258	0.757	2157	3472
1	18101641	18104783	RLOC_00005163	70	-	69.6	-69.2	0.345	0.833	71	80
1	18106238	18110396	RLOC_00005165	83	+	82.9	-80.0	0.244	0.746	111	139
1	18112361	18117662	RLOC_00005167	162	-	161.7	-132.2	0.28	0.777	76	109
1	18132544	18134017	RLOC_00005175	3	+	2.5	0.7	0.38	0.862	258	344
1	18136665	18139060	RLOC_00005178	37	+	37.3	-37.2	0.00137	0.0323	740	610
1	18174372	18176389	RLOC_00005188	20	-	20.2	-9.0	0.84	1	91	112
1	18176622	18182510	RLOC_00005189	9	-	9.2	4.0	0.866	1	598	1088
1	18183047	18187566	RLOC_00005191	73	-	72.6	18.7	0.408	0.88	219	312
1	18198110	18200366	RLOC_00005194	8	+	7.8	7.7	0.133	0.659	105	129
1	18215799	18219269	RLOC_00005200	19	+	19.3	-17.2	1	1	1887	2782
1	18234678	18237543	RLOC_00005207	29	+	29.4	-11.8	1	1	202	338
1	18237646	18238475	RLOC_00005208	12	-	11.8	6.7	0.316	0.809	133	216
1	18251989	18264672	RLOC_00005211	72	+	72.3	-31.3	0.668	1	195	300
1	18276642	18279532	RLOC_00005219	10	+	9.7	5.1	0.655	1	187	252
1	18282902	18285365	RLOC_00005221	8	+	8.5	2.9	0.68	1	212	364
1	18283998	18286965	RLOC_00005222	23	-	22.6	-17.8	1	1	457	875
1	18290941	18295905	RLOC_00005224	99	+	99.0	90.0	0.405	0.877	62	117
1	18310427	18311714	RLOC_00005229	3	+	2.8	-2.1	0.318	0.811	284	378
1	18314099	18316861	RLOC_00005231	29	-	29.4	-5.3	0.116	0.647	311	493
1	18320461	18322818	RLOC_00005234	5	-	5.5	-4.7	1	1	3451	4612
1	18326824	18328765	RLOC_00005235	16	+	15.5	2.2	0.458	0.916	125	152
1	18329665	18333765	RLOC_00005236	614	+	614.4	-614.4	0.00204	0.0452	57	75
1	18333187	18337520	RLOC_00005237	76	-	75.7	-71.8	0.167	0.683	70	104
1	18351323	18354634	RLOC_00005242	11	+	11.2	5.3	0.996	1	58	111
1	18354743	18356988	RLOC_00005243	10	+	10.5	5.4	0.452	0.911	205	336
1	18355996	18360447	RLOC_00005244	6	-	5.8	3.6	0.804	1	427	684
1	18367589	18375494	RLOC_00005248	378	-	377.8	-356.3	0.334	0.825	54	75
1	18377059	18379998	RLOC_00005250	35	-	34.6	34.2	0.245	0.746	367	648
1	18380362	18386149	RLOC_00005251	76	-	75.7	66.6	0.359	0.845	118	207
1	18391174	18394008	RLOC_00005255	17	-	17.1	-6.7	0.401	0.874	182	290
1	18400002	18402628	RLOC_00005258	6	+	6.1	4.9	0.262	0.761	129	273
1	18402121	18405620	RLOC_00005260	16	-	16.2	9.0	0.797	1	157	231
1	18407399	18410022	RLOC_00005261	62	+	61.9	-56.5	0.0907	0.64	52	84
1	18409653	18413040	RLOC_00005262	32	-	31.7	3.7	1	1	559	741
1	18416473	18420111	RLOC_00005263	21	+	20.9	20.6	0.131	0.658	226	425
1	18428787	18430497	RLOC_00005266	13	-	12.7	-5.9	0.0532	0.64	168	171
1	18454843	18456619	RLOC_00005275	12	-	12.0	-11.6	0.402	0.875	206	238
1	18470057	18473848	RLOC_00005279	52	+	52.2	-51.6	0.243	0.746	113	114
1	18494064	18497318	RLOC_00005286	18	-	18.2	13.6	0.739	1	171	331
1	18500027	18504691	RLOC_00005288	3	-	3.5	2.0	0.397	0.871	1679	2603
1	18504805	18506270	RLOC_00005289	11	+	11.0	-10.1	1	1	458	668
1	18507921	18513340	RLOC_00005290	74	+	73.9	72.7	0.183	0.697	129	239
1	18517556	18520624	RLOC_00005293	3	+	2.7	1.7	1	1	2734	4558
1	18519075	18521913	RLOC_00005295	1	-	1.0	-0.6	0.896	1	1412	2345
1	18522247	18539995	RLOC_00005296	465	-	465.1	464.9	0.435	0.9	106	143
1	18561801	18566427	RLOC_00005306	73	+	73.2	-65.8	0.722	1	45	68
1	18569500	18579175	RLOC_00005308	90	-	89.6	-52.1	0.925	1	106	164
1	18581997	18587256	RLOC_00005310	117	+	116.9	94.8	1	1	338	564
1	18591154	18598523	RLOC_00005312	8	-	8.3	3.1	0.84	1	814	1320
1	18614200	18617155	RLOC_00005316	8	-	8.2	5.2	1	1	1192	1742
1	18617532	18626441	RLOC_00005317	631	-	631.4	-631.3	0.229	0.739	55	107
1	18627410	18632039	RLOC_00005319	186	-	186.3	-186.0	1	1	256	273
1	18637662	18639544	RLOC_00005322	2	-	1.8	-0.5	0.177	0.689	968	1829
1	18658507	18662052	RLOC_00005330	17	+	16.9	1.8	0.211	0.724	294	548
1	18662265	18666515	RLOC_00005331	39	+	38.6	1.0	0.553	0.978	91	148
1	18672131	18677712	RLOC_00005334	21	+	21.2	-8.2	0.882	1	126	141
1	18677693	18680300	RLOC_00005335	19	-	19.0	-18.7	0.562	0.985	171	208
1	18681912	18685968	RLOC_00005336	17	-	16.8	-2.0	0.272	0.77	389	702
1	18685292	18687907	RLOC_00005337	14	+	13.7	11.0	0.229	0.738	352	588
1	18687784	18690503	RLOC_00005339	30	-	30.3	-30.2	0.359	0.845	117	178
1	18693649	18697713	RLOC_00005341	61	+	61.0	58.9	0.549	0.976	67	99
1	18701881	18704943	RLOC_00005343	5	+	4.9	3.0	0.4	0.874	1127	2093
1	18704163	18706589	RLOC_00005344	23	-	22.9	22.8	1	1	142	259
1	18707888	18716118	RLOC_00005345	124	-	124.0	-119.8	0.492	0.942	112	169
1	18716122	18721285	RLOC_00005346	37	+	36.6	-22.8	0.94	1	123	214
1	18724143	18728400	RLOC_00005349	18	-	17.9	-13.8	0.288	0.783	258	448
1	18728633	18730498	RLOC_00005352	14	-	13.7	-6.8	0.388	0.867	108	204
1	18732192	18734199	RLOC_00005354	18	-	17.5	16.5	0.143	0.664	26	45
1	18737062	18739649	RLOC_00005355	14	-	14.3	14.2	0.399	0.873	281	372
1	18748249	18751460	RLOC_00005357	140	+	140.3	-89.4	0.1	0.642	90	83
1	18750986	18753697	RLOC_00005358	26	-	26.0	-23.4	0.175	0.689	69	113
1	18756223	18758595	RLOC_00005360	52	-	52.4	16.9	1	1	104	129
1	18770936	18774759	RLOC_00005363	8	+	7.9	7.1	0.759	1	234	396
1	18774768	18777069	RLOC_00005365	23	-	22.8	22.3	0.106	0.646	192	235
1	18784461	18787824	RLOC_00005370	22	-	21.6	7.9	0.674	1	113	195
1	18795187	18802375	RLOC_00005373	495	+	494.6	494.5	1	1	130	156
1	18802551	18803755	RLOC_00005374	8	+	8.2	-8.1	1	1	171	300
1	18807683	18815537	RLOC_00005376	140	+	139.7	-139.0	1	1	218	471
1	18839046	18844595	RLOC_00005386	41	+	41.1	22.5	0.526	0.96	118	196
1	18866142	18867533	RLOC_00005392	11	+	10.8	-9.5	0.672	1	146	209
1	18870058	18872974	RLOC_00005395	3	+	3.0	2.8	1	1	561	920
1	18877796	18880001	RLOC_00005397	17	-	16.8	-16.8	1	1	156	348
1	18926887	18931045	RLOC_00005413	8	+	7.6	-2.9	0.882	1	1314	2022
1	18934278	18937717	RLOC_00005417	89	+	88.7	-80.7	0.084	0.64	841	1398
1	18943446	18945812	RLOC_00005420	28	-	28.0	-2.6	0.631	1	51	79
1	18949531	18951891	RLOC_00005422	5	+	4.8	-1.5	0.9	1	371	581
1	18984280	18986653	RLOC_00005429	9	+	8.8	8.8	2.44e-14	6.8e-12	4512	7803
1	19018925	19021807	RLOC_00005439	19	-	18.9	12.7	0.515	0.952	149	214
1	19030997	19035121	RLOC_00005442	73	+	72.6	-68.5	0.173	0.688	99	146
1	19035643	19039398	RLOC_00005443	71	+	71.4	-66.8	0.0548	0.64	111	169
1	19044160	19047518	RLOC_00005445	625	+	624.5	-622.6	0.000367	0.00993	79	130
1	19047835	19053535	RLOC_00005446	133	+	132.6	126.2	0.116	0.647	131	231
1	19051673	19053731	RLOC_00005447	2	-	2.3	-2.0	7.19e-15	2.22e-12	11895	17478
1	19057471	19061714	RLOC_00005448	170	+	169.5	-134.8	0.217	0.727	25	28
1	19068240	19069855	RLOC_00005450	23	+	22.6	20.0	1	1	196	327
1	19087383	19090523	RLOC_00005454	53	+	53.2	-41.2	0.182	0.696	84	86
1	19097711	19101265	RLOC_00005457	9	-	9.3	8.4	0.431	0.898	746	1285
1	19102790	19104933	RLOC_00005458	10	-	9.6	-6.4	0.197	0.711	364	621
1	19115550	19117554	RLOC_00005462	4	+	4.1	-2.1	0.569	0.989	126	223
1	19117031	19119382	RLOC_00005463	20	-	20.2	-18.2	0.257	0.757	100	170
1	19119593	19122038	RLOC_00005465	11	-	11.4	9.3	0.826	1	196	295
1	19122053	19126709	RLOC_00005466	8	-	8.4	8.3	0.439	0.902	620	883
1	19128055	19132335	RLOC_00005468	32	-	32.5	20.2	0.905	1	102	154
1	19132295	19135840	RLOC_00005470	27	+	26.9	-19.1	0.765	1	118	160
1	19136213	19139989	RLOC_00005471	41	+	40.9	40.0	0.367	0.852	141	219
1	19141259	19144323	RLOC_00005473	6	-	5.6	1.4	0.956	1	424	722
1	19152507	19154051	RLOC_00005476	1	+	0.9	-0.2	0.919	1	1061	1887
1	19158722	19161729	RLOC_00005478	15	-	14.7	-0.5	1	1	431	661
1	19163842	19170458	RLOC_00005479	285	+	284.5	-251.4	1	1	226	205
1	19173879	19175228	RLOC_00005481	12	+	12.3	11.3	0.00495	0.0967	225	403
1	19180757	19186549	RLOC_00005483	103	+	103.4	101.5	0.306	0.798	126	159
1	19186397	19188795	RLOC_00005484	10	-	10.3	4.7	0.503	0.947	333	494
1	19191465	19194908	RLOC_00005486	16	+	15.7	15.4	0.58	0.995	109	166
1	19199332	19201707	RLOC_00005488	15	+	15.3	14.4	0.0615	0.64	294	789
1	19220235	19225797	RLOC_00005494	242	-	242.4	-236.7	9.13e-07	5e-05	374	561
1	19242653	19250863	RLOC_00005499	267	-	267.1	267.0	0.162	0.676	74	141
1	19295819	19299171	RLOC_00005511	9	-	8.9	-7.1	0.608	1	370	563
1	19305080	19307518	RLOC_00005513	15	+	15.4	14.8	0.166	0.682	384	561
1	19311094	19314193	RLOC_00005515	15	-	15.4	-0.3	0.985	1	54	82
1	19323054	19326918	RLOC_00005517	11	-	10.5	10.2	0.289	0.784	524	981
1	19333046	19336129	RLOC_00005519	29	-	29.5	29.2	1	1	298	640
1	19358799	19360822	RLOC_00005526	50	-	50.3	-46.5	0.433	0.899	61	86
1	19369088	19372132	RLOC_00005528	23	+	22.8	2.6	0.822	1	108	163
1	19383077	19385602	RLOC_00005533	33	-	32.9	27.9	1	1	280	597
1	19407258	19408319	RLOC_00005537	20	-	20.3	2.8	0.22	0.73	69	95
1	19434488	19439078	RLOC_00005546	256	+	256.3	-248.9	2.73e-06	0.000134	380	608
1	19439366	19443627	RLOC_00005547	13	-	13.1	9.4	1	1	851	2182
1	19453379	19454704	RLOC_00005550	2	-	1.7	1.7	8.47e-07	4.68e-05	4746	7581
1	19454798	19456499	RLOC_00005551	2	+	2.3	-1.4	1	1	18279	32260
1	19458611	19459763	RLOC_00005553	11	-	10.7	-4.1	0.906	1	39	45
1	19460481	19463481	RLOC_00005554	48	+	47.7	-35.0	0.264	0.763	49	68
1	19467930	19472568	RLOC_00005556	296	-	295.8	268.2	1	1	203	330
1	19474774	19476239	RLOC_00005557	4	-	4.5	-3.4	1	1	457	840
1	19478052	19482875	RLOC_00005558	155	+	155.1	135.5	0.00535	0.103	281	463
1	19484277	19487997	RLOC_00005559	23	+	22.7	22.1	0.255	0.756	160	189
1	19489788	19493069	RLOC_00005562	44	-	44.3	42.9	0.516	0.952	432	740
1	19496460	19497720	RLOC_00005566	4	+	3.8	-2.0	0.961	1	114	177
1	19499145	19506309	RLOC_00005568	81	+	80.7	80.7	0.488	0.938	152	247
1	19506355	19508935	RLOC_00005569	28	+	27.8	-27.0	0.227	0.736	91	144
1	19508937	19511641	RLOC_00005570	11	+	11.4	8.7	0.74	1	119	190
1	19514722	19518411	RLOC_00005572	20	+	19.6	19.2	1	1	359	1176
1	19520602	19525693	RLOC_00005573	47	+	46.7	46.5	0.148	0.665	235	563
1	19527821	19531443	RLOC_00005575	15	+	15.2	-7.2	0.592	1	338	571
1	19559799	19565274	RLOC_00005583	27	-	27.1	-25.9	1	1	1073	1773
1	19565600	19568391	RLOC_00005586	159	+	159.0	-123.7	0.123	0.647	51	59
1	19570047	19572204	RLOC_00005589	40	-	39.7	39.2	0.0915	0.64	123	169
1	19572731	19574057	RLOC_00005590	30	-	29.6	29.5	1	1	126	194
1	19579629	19580856	RLOC_00005592	5	-	5.4	-1.1	0.626	1	107	107
1	19588996	19590288	RLOC_00005596	9	-	9.3	-7.6	0.35	0.837	152	319
1	19590432	19592755	RLOC_00005597	10	+	10.0	8.8	0.255	0.756	278	555
1	19614930	19617611	RLOC_00005611	93	-	93.2	-79.5	0.0582	0.64	64	86
1	19640524	19641665	RLOC_00005618	5	+	4.8	1.7	0.293	0.787	438	775
1	19642465	19646561	RLOC_00005619	36	+	36.2	-33.0	0.0525	0.64	1206	1751
1	19651171	19652825	RLOC_00005621	5	+	5.4	5.4	1	1	547	1113
1	19658600	19663488	RLOC_00005623	83	+	83.2	-77.9	0.0804	0.64	202	222
1	19669007	19671952	RLOC_00005628	68	-	67.8	58.3	0.0795	0.64	495	804
1	19685544	19688028	RLOC_00005635	1	+	1.2	-0.1	0.718	1	463	521
1	19696922	19698482	RLOC_00005637	45	-	44.5	36.4	1	1	65	193
1	19708006	19709399	RLOC_00005641	11	+	10.9	7.7	0.243	0.746	90	140
1	19711178	19713308	RLOC_00005644	11	+	11.4	-0.5	0.415	0.885	203	365
1	19716401	19723725	RLOC_00005645	75	+	74.6	-67.4	0.844	1	94	139
1	19737414	19740368	RLOC_00005651	10	+	9.8	-6.6	0.725	1	214	289
1	19744947	19747287	RLOC_00005653	32	-	31.7	31.5	0.146	0.664	153	315
1	19760000	19761496	RLOC_00005658	25	-	24.7	24.7	0.388	0.866	83	89
1	19771915	19775818	RLOC_00005661	70	+	70.5	42.7	0.288	0.783	105	168
1	19778132	19779447	RLOC_00005663	28	+	28.1	27.1	0.294	0.787	37	53
1	19783343	19787363	RLOC_00005665	82	+	82.0	80.5	0.244	0.746	106	157
1	19806262	19807705	RLOC_00005673	37	+	36.9	-19.1	1	1	119	160
1	19820564	19822262	RLOC_00005677	8	-	8.1	6.2	0.713	1	121	254
1	19831351	19833028	RLOC_00005678	4	+	4.4	-4.1	0.641	1	124	233
1	19837109	19840370	RLOC_00005679	39	+	38.7	38.7	0.153	0.667	80	98
1	19844449	19847856	RLOC_00005681	26	+	25.5	12.7	0.164	0.68	293	391
1	19849691	19851934	RLOC_00005683	19	-	19.4	0.9	1	1	166	334
1	19854560	19857138	RLOC_00005685	9	-	8.6	7.0	1	1	741	1283
1	19857303	19859273	RLOC_00005686	23	+	22.9	-22.3	0.765	1	75	77
1	19864694	19867389	RLOC_00005690	3	-	3.1	1.7	0.168	0.685	261	466
1	19871115	19873804	RLOC_00005693	30	+	30.3	-2.7	1	1	165	275
1	19879430	19882975	RLOC_00005694	67	+	66.5	-64.4	0.151	0.666	115	186
1	19883919	19888413	RLOC_00005695	2	-	1.6	0.9	0.971	1	1621	2935
1	19890934	19893504	RLOC_00005696	14	-	14.2	-9.4	0.058	0.64	450	803
1	19902501	19907114	RLOC_00005700	257	+	256.9	-110.5	0.237	0.743	62	121
1	19912960	19916686	RLOC_00005704	219	-	219.3	-170.5	0.148	0.665	51	67
1	19917993	19923936	RLOC_00005705	333	+	332.8	-331.2	0.0158	0.266	239	451
1	19924666	19926713	RLOC_00005706	18	+	18.1	0.6	0.171	0.687	260	443
1	19934986	19941212	RLOC_00005710	1251	+	1251.1	-1250.2	5.78e-06	0.000253	157	365
1	19945810	19951729	RLOC_00005711	123	+	123.4	-123.2	0.085	0.64	287	485
1	19947629	19956804	RLOC_00005712	209	-	208.9	-137.9	0.263	0.762	197	255
1	19966923	19969757	RLOC_00005717	11	-	10.6	-7.7	0.498	0.945	322	523
1	19970559	19975337	RLOC_00005719	16	-	16.5	-11.9	0.612	1	374	519
1	19976354	19978048	RLOC_00005720	2	-	2.1	1.3	0.51	0.95	335	626
1	19978100	19980125	RLOC_00005721	24	+	23.7	-22.9	0.423	0.893	86	119
1	19981373	19982307	RLOC_00005723	15	+	15.5	-5.7	0.817	1	79	140
1	19984541	19986112	RLOC_00005727	4	-	4.0	-0.8	0.098	0.64	636	1015
1	19987109	19991214	RLOC_00005728	9	+	8.9	5.7	0.838	1	370	482
1	19991270	19993458	RLOC_00005729	7	-	7.2	6.0	5.44e-05	0.0019	1319	2187
1	19996204	20000782	RLOC_00005730	134	+	134.2	-108.0	0.116	0.647	91	128
1	20006518	20006992	RLOC_00005733	2	-	1.9	-1.3	0.563	0.985	509	855
1	20016220	20017932	RLOC_00005739	21	-	20.7	20.7	0.539	0.969	31	40
1	20026015	20028756	RLOC_00005744	10	-	9.5	5.9	0.874	1	107	178
1	20028895	20031596	RLOC_00005745	42	-	41.8	3.1	0.465	0.921	75	125
1	20036565	20039301	RLOC_00005748	13	+	13.1	-3.7	0.282	0.778	371	483
1	20052415	20056387	RLOC_00005753	44	-	44.4	-42.3	0.679	1	86	128
1	20056525	20059803	RLOC_00005754	92	+	91.6	91.6	0.165	0.681	64	97
1	20061404	20065713	RLOC_00005755	13	+	12.9	-10.2	0.471	0.926	581	675
1	20065393	20068500	RLOC_00005756	38	-	38.4	38.2	1	1	341	562
1	20068964	20071171	RLOC_00005757	26	-	26.3	-9.0	0.151	0.666	139	231
1	20071177	20073804	RLOC_00005758	12	-	12.3	-4.4	0.918	1	140	232
1	20073972	20079022	RLOC_00005759	306	-	305.7	305.7	0.00474	0.093	428	596
1	20081643	20084551	RLOC_00005761	12	+	12.3	-8.5	0.675	1	151	224
1	20101298	20103690	RLOC_00005768	5	+	4.8	-0.9	0.321	0.814	477	824
1	20103755	20106077	RLOC_00005769	8	-	8.3	3.7	0.604	1	231	504
1	20134843	20137013	RLOC_00005779	3	+	2.5	2.4	1	1	1852	3041
1	20154153	20156520	RLOC_00005789	24	-	24.0	-19.9	0.0785	0.64	207	309
1	20158554	20160872	RLOC_00005790	4	-	4.2	1.6	0.812	1	637	1138
1	20167593	20169762	RLOC_00005792	11	+	11.4	-9.9	0.067	0.64	543	1014
1	20169738	20173949	RLOC_00005793	120	-	120.4	-118.8	0.145	0.664	66	469
1	20180609	20182374	RLOC_00005795	8	+	8.1	6.3	0.257	0.757	367	538
1	20183544	20187096	RLOC_00005797	16	-	16.1	13.6	1	1	663	1136
1	20194711	20199193	RLOC_00005800	33	-	33.0	-24.1	1	1	426	694
1	20201797	20204431	RLOC_00005802	13	+	12.6	11.3	0.0753	0.64	186	259
1	20210800	20214041	RLOC_00005804	6	+	6.0	-1.7	0.694	1	512	799
1	20213888	20215277	RLOC_00005805	15	-	14.7	11.3	0.535	0.967	78	123
1	20215432	20218699	RLOC_00005806	35	+	34.7	34.5	0.394	0.869	97	147
1	20221004	20226055	RLOC_00005808	84	-	84.2	-63.6	1	1	144	239
1	20235691	20237620	RLOC_00005811	127	+	126.7	126.7	0.00294	0.0612	41	67
1	20241225	20242665	RLOC_00005812	6	+	5.8	-2.3	0.798	1	205	375
1	20246025	20250356	RLOC_00005815	29	-	29.4	-2.6	0.934	1	69	131
1	20256916	20262279	RLOC_00005819	26	+	25.5	9.3	0.682	1	653	1034
1	20268473	20270140	RLOC_00005822	6	-	6.2	5.3	0.559	0.983	340	580
1	20275533	20277981	RLOC_00005825	9	-	9.0	5.6	0.11	0.647	488	790
1	20283416	20293355	RLOC_00005827	218	+	217.6	-216.9	0.1	0.642	684	1172
1	20293138	20297257	RLOC_00005830	21	-	21.5	19.8	0.279	0.777	204	278
1	20301071	20303949	RLOC_00005833	50	-	49.7	46.2	0.0746	0.64	70	87
1	20304514	20307110	RLOC_00005834	53	-	53.2	-47.4	0.186	0.702	89	137
1	20309472	20310850	RLOC_00005836	4	-	3.8	3.8	1.17e-10	1.43e-08	8317	10733
1	20322963	20328238	RLOC_00005840	200	+	200.0	-194.6	0.243	0.746	71	75
1	20340561	20343547	RLOC_00005843	19	-	19.1	19.1	0.33	0.822	210	340
1	20350122	20358026	RLOC_00005846	110	+	110.1	110.1	0.201	0.715	189	310
1	20356953	20357879	RLOC_00005847	1	-	1.1	-0.4	0.6	1	701	1169
1	20358237	20362593	RLOC_00005848	86	-	86.3	85.8	0.521	0.956	75	133
1	20363302	20366140	RLOC_00005849	3	+	2.9	2.7	0.663	1	492	767
1	20389346	20391147	RLOC_00005856	6	+	5.6	3.3	0.00531	0.102	974	1517
1	20401356	20403166	RLOC_00005861	11	-	11.3	10.4	6.92e-10	7.58e-08	848	1534
1	20408093	20411692	RLOC_00005864	250	-	250.3	-213.9	1	1	106	150
1	20414315	20415287	RLOC_00005868	2	-	2.4	-1.9	0.322	0.816	437	806
1	20416657	20421156	RLOC_00005871	118	-	118.4	118.4	0.508	0.949	34	35
1	20424331	20430220	RLOC_00005874	161	+	161.1	129.7	0.67	1	55	138
1	20430601	20432031	RLOC_00005875	16	+	16.0	16.0	0.0389	0.589	239	344
1	20433846	20437349	RLOC_00005877	66	+	65.5	-32.5	0.165	0.681	175	310
1	20439369	20445022	RLOC_00005879	7	+	7.1	6.5	1	1	3668	4924
1	20447156	20450963	RLOC_00005881	72	+	71.6	-49.3	1	1	294	371
1	20451082	20452699	RLOC_00005882	2	+	2.3	-0.6	0.749	1	230	346
1	20454361	20456224	RLOC_00005885	20	+	19.7	10.5	0.269	0.767	76	123
1	20470677	20475202	RLOC_00005890	18	+	18.0	1.4	0.952	1	140	209
1	20504928	20506538	RLOC_00005903	22	+	22.3	-14.5	0.505	0.948	56	76
1	20511330	20513691	RLOC_00005906	21	+	21.2	-15.8	0.45	0.91	147	292
1	20514625	20516551	RLOC_00005907	8	+	7.7	6.3	0.494	0.942	343	464
1	20525635	20530468	RLOC_00005909	9	+	9.0	-6.2	0.777	1	229	521
1	20534867	20539189	RLOC_00005912	317	+	317.5	245.6	0.298	0.791	21	26
1	20554360	20558628	RLOC_00005917	49	+	48.8	48.5	1	1	195	314
1	20560196	20563581	RLOC_00005919	34	-	34.4	-32.2	0.568	0.988	149	181
1	20574473	20577351	RLOC_00005923	16	+	15.8	2.0	0.701	1	120	193
1	20577376	20580010	RLOC_00005925	15	+	14.6	14.6	1	1	291	454
1	20580285	20588304	RLOC_00005926	831	+	830.8	-828.0	0.0048	0.0941	85	175
1	20588355	20589251	RLOC_00005930	2	+	2.3	1.1	0.735	1	234	397
1	20597711	20598747	RLOC_00005933	10	-	10.4	9.9	0.0871	0.64	133	342
1	20607014	20612723	RLOC_00005938	89	+	88.7	39.0	0.805	1	57	78
1	20614572	20616525	RLOC_00005939	25	+	25.5	25.1	1	1	348	730
1	20617080	20620136	RLOC_00005940	60	-	60.1	60.1	1	1	170	254
1	20617312	20618005	RLOC_00005941	2	+	1.9	-1.3	0.915	1	114	214
1	20627906	20629692	RLOC_00005945	6	-	6.3	1.4	0.959	1	112	222
1	20629697	20633007	RLOC_00005946	7	+	6.8	6.2	0.091	0.64	574	821
1	20637379	20649102	RLOC_00005948	610	+	609.9	-463.6	0.0351	0.537	105	119
1	20648089	20649029	RLOC_00005949	1	-	0.7	0.3	0.647	1	3305	5853
1	20666165	20668850	RLOC_00005952	4	-	4.5	4.1	0.19	0.702	1047	1595
1	20673767	20676449	RLOC_00005954	72	+	72.1	-61.8	0.000192	0.00558	118	202
1	20703902	20707106	RLOC_00005962	19	-	18.7	10.5	0.0548	0.64	315	881
1	20707306	20709027	RLOC_00005963	5	+	4.7	-0.2	0.642	1	203	300
1	20711443	20715593	RLOC_00005965	157	+	157.1	153.6	0.0279	0.431	293	535
1	20715562	20719261	RLOC_00005966	4	-	3.8	-3.6	0.229	0.739	795	1377
1	20719472	20722856	RLOC_00005967	31	+	31.3	-28.0	0.191	0.702	147	207
1	20723278	20725747	RLOC_00005968	15	+	15.1	5.0	0.484	0.935	88	124
1	20725469	20728091	RLOC_00005969	20	-	20.1	-10.3	0.276	0.774	293	389
1	20729124	20731356	RLOC_00005971	19	-	19.3	19.3	1	1	297	432
1	20787015	20791194	RLOC_00005985	10	-	9.8	-4.0	0.851	1	148	231
1	20802496	20803610	RLOC_00005991	1	-	0.8	-0.7	1	1	13399	20423
1	20803631	20807947	RLOC_00005993	49	-	49.3	-32.8	1	1	1010	1341
1	20808198	20813061	RLOC_00005994	49	-	48.5	21.2	0.775	1	100	161
[truncated: 9,716 more rows]
