# Supplementary material for: Widespread premature transcription termination of Arabidopsis thaliana NLR genes by the spen protein FPA
Source: eLife. 2021 Apr 27;10:e65537. doi: 10.7554/eLife.65537 (PMC8116057; doi:10.7554/eLife.65537)
Supplement: Figure 2—source data 6. [file elife-65537-fig2-data6.tds]

1	3654	3913	RLOC_00000001	.	+	26.39	0.4070	0.1928	0.3246	0.04216
1	3995	4276	RLOC_00000001	.	+	40.76	0.3574	0.1026	0.2077	0.04216
1	4485	4605	RLOC_00000001	.	+	28.15	0.4228	0.2068	0.3409	0.04216
1	4705	5095	RLOC_00000001	.	+	60.37	0.1224	0.6662	0.7697	0.04216
1	5173	5326	RLOC_00000001	.	+	41.27	-0.2558	0.04108	0.1099	0.04216
1	5438	5722	RLOC_00000001	.	+	39.23	-0.5616	0.00226	0.01528	0.04216
1	5938	6247	RLOC_00000002	.	-	10.17	6.1704	1.642e-16	3.185e-14	4.403e-14
1	6433	6814	RLOC_00000002	.	-	19.82	2.9713	2.963e-16	5.602e-14	4.403e-14
1	6814	7069	RLOC_00000002	.	-	171.63	-0.2743	0.4815	0.6172	4.403e-14
1	7069	7156	RLOC_00000002	.	-	8.04	0.4647	0.2756	0.4171	4.403e-14
1	7156	7233	RLOC_00000002	.	-	130.01	-0.4150	0.02074	0.06852	4.403e-14
1	7383	7451	RLOC_00000002	.	-	97.74	-0.2229	0.04474	0.1166	4.403e-14
1	7563	7649	RLOC_00000002	.	-	122.40	-0.3332	0.01481	0.05431	4.403e-14
1	7761	8235	RLOC_00000002	.	-	150.91	0.0454	0.5569	0.6822	4.403e-14
1	8235	8464	RLOC_00000002	.	-	147.30	0.3981	0.002498	0.01634	4.403e-14
1	8570	8697	RLOC_00000002	.	-	90.04	0.3391	0.06827	0.1562	4.403e-14
1	11688	11800	RLOC_00000002	.	-	4.63	0.8336	0.1626	0.2876	4.403e-14
1	11853	13173	RLOC_00000002	.	-	165.35	-0.3838	0.005342	0.02731	4.403e-14
1	13334	13415	RLOC_00000002	.	-	18.49	0.1203	0.7712	0.8481	4.403e-14
1	13415	13552	RLOC_00000002	.	-	13.93	0.4311	0.2623	0.4025	4.403e-14
1	23156	24024	RLOC_00000004	.	+	77.01	0.8222	0.0003042	0.003931	0.001947
1	24024	24451	RLOC_00000004	.	+	63.11	0.9819	5.876e-05	0.00123	0.001947
1	24541	24602	RLOC_00000004	.	+	21.48	0.0670	0.2661	0.4067	0.001947
1	24602	24655	RLOC_00000004	.	+	22.84	0.0134	0.2875	0.4297	0.001947
1	24751	24962	RLOC_00000004	.	+	35.59	0.4678	0.01355	0.05117	0.001947
1	25039	25435	RLOC_00000004	.	+	51.02	0.8680	7.661e-05	0.001492	0.001947
1	25523	25743	RLOC_00000004	.	+	37.13	0.7643	0.0002032	0.002969	0.001947
1	25824	25997	RLOC_00000004	.	+	40.73	0.5232	0.003625	0.021	0.001947
1	26080	26203	RLOC_00000004	.	+	40.85	0.4895	0.004557	0.02446	0.001947
1	26291	26452	RLOC_00000004	.	+	31.63	0.9016	0.0002436	0.00337	0.001947
1	26542	26776	RLOC_00000004	.	+	55.91	-0.0807	0.424	0.5646	0.001947
1	26861	27012	RLOC_00000004	.	+	63.12	-0.4743	0.4948	0.6289	0.001947
1	27098	27281	RLOC_00000004	.	+	53.69	-0.1824	0.7086	0.8018	0.001947
1	27371	27535	RLOC_00000004	.	+	30.21	0.4966	0.0295	0.08737	0.001947
1	27535	27617	RLOC_00000004	.	+	2.57	0.3127	0.3128	0.4561	0.001947
1	27617	27713	RLOC_00000004	.	+	41.68	0.5404	0.00343	0.02024	0.001947
1	27802	28530	RLOC_00000004	.	+	134.07	0.3675	0.0003589	0.004404	0.001947
1	28530	28805	RLOC_00000004	.	+	70.79	0.1193	0.09605	0.1984	0.001947
1	28889	29080	RLOC_00000004	.	+	93.94	-0.0183	0.1588	0.2829	0.001947
1	29159	30065	RLOC_00000004	.	+	326.66	-0.2147	0.6686	0.7716	0.001947
1	30146	30311	RLOC_00000004	.	+	165.54	-0.4698	0.04214	0.1118	0.001947
1	30409	30816	RLOC_00000004	.	+	378.18	-0.9416	3.893e-05	0.0009032	0.001947
1	30901	31210	RLOC_00000004	.	+	181.55	-1.3029	9.945e-05	0.001792	0.001947
1	31188	31424	RLOC_00000006	.	-	529.32	-0.1336	0.1659	0.2919	0.1105
1	31519	31852	RLOC_00000006	.	-	862.18	-0.2138	0.007954	0.03567	0.1105
1	31915	32003	RLOC_00000006	.	-	496.09	-0.1218	0.07476	0.1666	0.1105
1	32086	32195	RLOC_00000006	.	-	494.22	0.1433	0.1473	0.2681	0.1105
1	32280	32348	RLOC_00000006	.	-	442.13	0.1478	0.03751	0.1033	0.1105
1	32545	32672	RLOC_00000006	.	-	506.08	0.1730	0.02849	0.08526	0.1105
1	33028	33138	RLOC_00000006	.	-	277.84	0.2015	0.1322	0.2484	0.1105
1	33739	34329	RLOC_00000008	.	-	991.41	-0.6504	0.0109	0.04417	0.001145
1	34400	35474	RLOC_00000008	.	-	1302.26	-0.2276	0.09598	0.1983	0.001145
1	35566	35648	RLOC_00000008	.	-	241.87	0.2279	0.0136	0.05129	0.001145
1	35729	35963	RLOC_00000008	.	-	398.36	0.1768	0.02122	0.06962	0.001145
1	36623	36685	RLOC_00000008	.	-	207.52	-0.0355	0.4098	0.5511	0.001145
1	36809	36921	RLOC_00000008	.	-	204.18	0.3776	0.001871	0.01346	0.001145
1	37022	37398	RLOC_00000008	.	-	173.54	0.5942	1.924e-05	0.000538	0.001145
1	37568	37697	RLOC_00000008	.	-	68.64	0.1817	0.1028	0.208	0.001145
1	38799	39054	RLOC_00000009	.	-	62.87	-0.1338	0.4807	0.6165	0.9809
1	39135	39287	RLOC_00000009	.	-	61.81	-0.1226	0.4752	0.6116	0.9809
1	39408	39814	RLOC_00000009	.	-	75.55	0.0798	0.6004	0.7179	0.9809
1	40212	40329	RLOC_00000009	.	-	47.10	0.0198	0.8671	0.9154	0.9809
1	40472	40535	RLOC_00000009	.	-	43.03	0.0226	0.7321	0.8193	0.9809
1	40674	40903	RLOC_00000009	.	-	50.16	0.0986	0.5093	0.6413	0.9809
1	45292	46159	RLOC_00000011	.	-	1236.45	-0.2440	0.0001583	0.002488	0.0007568
1	46159	46348	RLOC_00000011	.	-	11.53	0.1548	0.7309	0.8184	0.0007568
1	46348	46812	RLOC_00000011	.	-	574.40	-0.0170	0.3766	0.5194	0.0007568
1	47482	48853	RLOC_00000011	.	-	6424.11	0.0022	0.2823	0.4243	0.0007568
1	48935	49275	RLOC_00000011	.	-	1167.17	0.5197	1.15e-05	0.0003591	0.0007568
1	50068	50339	RLOC_00000012	.	-	3461.46	-0.1080	0.3701	0.513	0.02644
1	50339	50417	RLOC_00000012	.	-	12.01	-1.8344	0.001728	0.01276	0.02644
1	50417	50632	RLOC_00000012	.	-	4903.51	-0.0920	0.01836	0.06306	0.02644
1	50881	50965	RLOC_00000012	.	-	2698.65	0.0751	0.06322	0.1482	0.02644
1	51063	51190	RLOC_00000012	.	-	1756.29	0.1684	0.001228	0.01011	0.02644
1	52245	52346	RLOC_00000013	.	+	14.50	0.8655	0.008558	0.03748	0.1167
1	52433	52730	RLOC_00000013	.	+	34.12	0.3264	0.1093	0.2172	0.1167
1	52937	53183	RLOC_00000013	.	+	33.98	0.0779	0.9932	0.9967	0.1167
1	53483	53624	RLOC_00000013	.	+	30.77	-0.3243	0.05124	0.128	0.1167
1	53702	54607	RLOC_00000013	.	+	109.86	-0.1581	0.2017	0.3353	0.1167
1	63295	63793	RLOC_00000015	.	-	92.27	-0.9851	0.004193	0.02311	0.06313
1	63793	63900	RLOC_00000015	.	-	21.40	-0.6912	0.4299	0.5702	0.06313
1	64152	64477	RLOC_00000015	.	-	467.31	-0.2675	0.3741	0.517	0.06313
1	64581	64658	RLOC_00000015	.	-	396.60	-0.3456	0.1635	0.2888	0.06313
1	64748	65018	RLOC_00000015	.	-	670.13	-0.2255	0.08941	0.1888	0.06313
1	65109	65218	RLOC_00000015	.	-	567.75	-0.2067	0.02937	0.0871	0.06313
1	65330	65456	RLOC_00000015	.	-	552.65	-0.0711	0.7014	0.7964	0.06313
1	65562	65652	RLOC_00000015	.	-	472.38	0.1333	0.1113	0.2201	0.06313
1	65732	65866	RLOC_00000015	.	-	484.16	0.1011	0.2307	0.3679	0.06313
1	66101	66161	RLOC_00000015	.	-	367.48	0.0933	0.2661	0.4068	0.06313
1	66260	66344	RLOC_00000015	.	-	406.73	0.0121	0.6713	0.7736	0.06313
1	66449	66557	RLOC_00000015	.	-	509.30	0.0852	0.2068	0.3409	0.06313
1	66676	66750	RLOC_00000015	.	-	367.83	0.1618	0.0594	0.1419	0.06313
1	66834	66899	RLOC_00000015	.	-	362.18	0.2043	0.003816	0.02173	0.06313
1	67320	67614	RLOC_00000015	.	-	542.72	0.1563	0.05343	0.1319	0.06313
1	72360	73216	RLOC_00000017	.	+	501.36	0.2949	0.06008	0.143	0.4595
1	73279	73395	RLOC_00000017	.	+	315.14	-0.0026	0.5808	0.702	0.4595
1	73485	73740	RLOC_00000017	.	+	503.32	-0.0288	0.324	0.4675	0.4595
1	73820	74250	RLOC_00000017	.	+	392.42	-0.2124	0.3037	0.4465	0.4595
1	73730	74787	RLOC_00000019	.	-	2608.72	-0.4026	0.08971	0.1892	0.575
1	74787	74882	RLOC_00000019	.	-	4.75	0.7963	0.09454	0.1962	0.575
1	75554	76597	RLOC_00000021	.	+	667.45	-0.0277	0.315	0.4582	0.9049
1	76597	76695	RLOC_00000021	.	+	13.69	0.0293	0.2967	0.4394	0.9049
1	77872	78038	RLOC_00000022	.	+	3.16	-0.0278	0.7814	0.8551	0.1986
1	79118	79183	RLOC_00000022	.	+	3.31	-1.3875	0.04278	0.113	0.1986
1	79277	79499	RLOC_00000022	.	+	9.04	-0.3144	0.7205	0.8107	0.1986
1	79904	79961	RLOC_00000022	.	+	3.68	1.2671	0.05044	0.1266	0.1986
1	80057	80256	RLOC_00000022	.	+	6.90	0.0963	0.6757	0.777	0.1986
1	80393	80701	RLOC_00000022	.	+	9.50	-0.7516	0.1209	0.2332	0.1986
1	81162	81362	RLOC_00000022	.	+	5.68	-0.0683	0.8219	0.8842	0.1986
1	81362	81512	RLOC_00000022	.	+	6.72	0.0543	0.711	0.8035	0.1986
1	81512	81569	RLOC_00000022	.	+	4.32	1.2435	0.03095	0.09037	0.1986
1	81569	81824	RLOC_00000022	.	+	15.53	-0.5114	0.3834	0.5259	0.1986
1	81910	82040	RLOC_00000022	.	+	6.72	-0.0151	0.4189	0.5597	0.1986
1	82279	82476	RLOC_00000022	.	+	7.14	1.4730	0.01731	0.06054	0.1986
1	83014	83401	RLOC_00000022	.	+	15.17	-0.0490	0.8066	0.8732	0.1986
1	83401	83462	RLOC_00000022	.	+	6.98	0.0280	0.8466	0.9011	0.1986
1	83462	83658	RLOC_00000022	.	+	11.30	0.1183	0.6284	0.7403	0.1986
1	82926	83671	RLOC_00000023	.	-	75.05	-0.3377	0.05124	0.128	0.4162
1	83883	84392	RLOC_00000023	.	-	50.52	0.1348	0.2631	0.4034	0.4162
1	84392	84536	RLOC_00000023	.	-	15.08	0.5003	0.1476	0.2685	0.4162
1	84536	84928	RLOC_00000023	.	-	19.36	0.0141	0.575	0.6974	0.4162
1	86737	86957	RLOC_00000024	.	-	12.91	-0.6652	0.05298	0.1311	0.4251
1	87939	88107	RLOC_00000024	.	-	6.60	0.8147	0.06464	0.1504	0.4251
1	88911	89082	RLOC_00000025	.	+	193.66	0.1503	0.06448	0.1502	0.009749
1	89167	89263	RLOC_00000025	.	+	207.43	0.0437	0.5366	0.6649	0.009749
1	89404	89930	RLOC_00000025	.	+	263.81	-0.0147	0.9925	0.9963	0.009749
1	90011	90597	RLOC_00000025	.	+	59.99	-0.6981	0.0003306	0.004167	0.009749
1	91401	91633	RLOC_00000027	.	+	27.27	1.2188	3.123e-07	1.777e-05	3.797e-05
1	91741	92089	RLOC_00000027	.	+	67.55	0.7649	0.001314	0.01059	3.797e-05
1	92269	92933	RLOC_00000027	.	+	118.47	0.4742	0.002219	0.0151	3.797e-05
1	93044	93171	RLOC_00000027	.	+	50.35	-0.0248	0.5268	0.6566	3.797e-05
1	93270	94291	RLOC_00000027	.	+	239.60	0.0238	0.1506	0.2724	3.797e-05
1	94356	95076	RLOC_00000027	.	+	253.32	-0.2736	0.04738	0.1213	3.797e-05
1	95159	95639	RLOC_00000027	.	+	193.04	-0.8591	0.0007548	0.007261	3.797e-05
1	96027	96157	RLOC_00000029	.	+	23.41	0.6133	0.02315	0.07395	0.2444
1	96553	97350	RLOC_00000029	.	+	71.94	-0.0664	0.682	0.7818	0.2444
1	97466	97807	RLOC_00000029	.	+	553.55	0.1306	0.03207	0.09264	0.2444
1	98456	98606	RLOC_00000029	.	+	523.94	-0.0239	0.6201	0.7337	0.2444
1	98907	99237	RLOC_00000029	.	+	469.69	-0.1735	0.04679	0.1203	0.2444
1	114298	114433	RLOC_00000035	.	+	80.50	0.2296	0.3083	0.4514	8.885e-05
1	114618	115339	RLOC_00000035	.	+	484.11	0.0664	0.9626	0.9781	8.885e-05
1	115339	115886	RLOC_00000035	.	+	40.34	-1.2465	8.269e-07	4.192e-05	8.885e-05
1	115947	116252	RLOC_00000035	.	+	158.67	0.2389	0.1707	0.2978	8.885e-05
1	120267	120400	RLOC_00000038	.	-	5.87	1.2633	0.01226	0.04786	1.048e-11
1	120400	120893	RLOC_00000038	.	-	9.10	5.0492	3.236e-14	5.092e-12	1.048e-11
1	121050	121408	RLOC_00000038	.	-	1143.14	-1.1699	0.0008026	0.007576	1.048e-11
1	121490	123517	RLOC_00000038	.	-	6948.63	-0.5672	3.611e-05	0.0008562	1.048e-11
1	123575	123671	RLOC_00000038	.	-	729.04	-0.1756	0.1175	0.2286	1.048e-11
1	123784	123901	RLOC_00000038	.	-	604.68	-0.1987	0.3264	0.4701	1.048e-11
1	123990	124126	RLOC_00000038	.	-	635.45	-0.0895	0.05664	0.1373	1.048e-11
1	124210	124633	RLOC_00000038	.	-	722.43	0.0850	0.003456	0.02035	1.048e-11
1	124712	124820	RLOC_00000038	.	-	432.53	0.0768	0.001508	0.01162	1.048e-11
1	124919	125024	RLOC_00000038	.	-	497.57	0.1551	0.002202	0.01502	1.048e-11
1	125133	125227	RLOC_00000038	.	-	531.55	0.0584	0.001796	0.01309	1.048e-11
1	125326	125655	RLOC_00000038	.	-	784.06	0.1209	0.002064	0.01439	1.048e-11
1	125741	125844	RLOC_00000038	.	-	370.09	0.1612	0.009157	0.03923	1.048e-11
1	125933	126000	RLOC_00000038	.	-	306.80	0.1266	0.002707	0.01723	1.048e-11
1	126075	126591	RLOC_00000038	.	-	951.36	0.1365	0.00114	0.009617	1.048e-11
1	126685	126840	RLOC_00000038	.	-	358.45	0.2091	0.0009865	0.008728	1.048e-11
1	126933	127453	RLOC_00000038	.	-	754.97	0.2758	0.0002493	0.003425	1.048e-11
1	127649	127782	RLOC_00000038	.	-	266.33	0.3491	6.996e-05	0.00139	1.048e-11
1	127866	127952	RLOC_00000038	.	-	256.33	0.3278	0.000422	0.004909	1.048e-11
1	128027	128314	RLOC_00000038	.	-	531.92	0.1895	0.001446	0.01129	1.048e-11
1	128478	128551	RLOC_00000038	.	-	284.05	0.1215	0.004172	0.02303	1.048e-11
1	128967	129062	RLOC_00000038	.	-	342.76	-0.0139	0.0412	0.1101	1.048e-11
1	129851	129915	RLOC_00000038	.	-	309.04	-0.1779	0.6864	0.7851	1.048e-11
1	130038	130149	RLOC_00000038	.	-	315.01	-0.0289	0.2242	0.3607	1.048e-11
1	130149	130269	RLOC_00000038	.	-	14.31	-0.8044	0.4083	0.5496	1.048e-11
1	130371	130566	RLOC_00000038	.	-	171.06	0.6973	0.0001217	0.002068	1.048e-11
1	132452	132687	RLOC_00000041	.	-	12.25	-0.7014	0.1027	0.208	0.6143
1	132833	133117	RLOC_00000041	.	-	10.75	0.0505	0.9458	0.9675	0.6143
1	133652	133752	RLOC_00000041	.	-	8.29	-0.1088	0.5151	0.6465	0.6143
1	133910	134046	RLOC_00000041	.	-	8.92	-0.3009	0.3733	0.5162	0.6143
1	134046	134162	RLOC_00000041	.	-	5.95	0.3431	0.2608	0.4009	0.6143
1	134329	134458	RLOC_00000041	.	-	5.45	0.5354	0.4395	0.579	0.6143
1	134588	134702	RLOC_00000041	.	-	5.95	0.3232	0.5723	0.6952	0.6143
1	136167	136234	RLOC_00000042	.	+	23.14	0.3436	0.1497	0.2712	0.0002101
1	136666	136816	RLOC_00000042	.	+	81.99	0.6351	2.39e-06	0.0001002	0.0002101
1	136934	137758	RLOC_00000042	.	+	544.12	-0.0303	0.2065	0.3406	0.0002101
1	137845	138128	RLOC_00000042	.	+	202.95	-0.6638	0.0002855	0.003757	0.0002101
1	142032	142281	RLOC_00000044	.	+	157.19	0.0306	0.7439	0.8281	0.9439
1	142423	142639	RLOC_00000044	.	+	252.35	0.0533	0.4304	0.5705	0.9439
1	142709	143103	RLOC_00000044	.	+	271.45	-0.1750	0.4848	0.62	0.9439
1	143103	143172	RLOC_00000044	.	+	16.04	0.1612	0.3643	0.5075	0.9439
1	143730	143824	RLOC_00000045	.	+	16.28	0.1179	0.6372	0.7471	4.645e-05
1	144446	144559	RLOC_00000045	.	+	39.59	0.1876	0.2935	0.436	4.645e-05
1	144926	145004	RLOC_00000045	.	+	43.31	-0.1329	0.4639	0.6013	4.645e-05
1	145131	145207	RLOC_00000045	.	+	36.33	-0.2842	0.3554	0.4991	4.645e-05
1	145344	145591	RLOC_00000045	.	+	44.39	-0.1950	0.4709	0.6077	4.645e-05
1	146191	146341	RLOC_00000045	.	+	3.28	4.1216	3.927e-07	2.175e-05	4.645e-05
1	147180	147333	RLOC_00000046	.	+	20.78	-0.0238	0.8849	0.9274	0.9844
1	147451	147539	RLOC_00000046	.	+	25.78	-0.0674	0.6197	0.7334	0.9844
1	147643	147748	RLOC_00000046	.	+	25.60	0.0736	0.7979	0.8671	0.9844
1	147748	147820	RLOC_00000046	.	+	8.51	0.0952	0.4929	0.6272	0.9844
1	148210	149108	RLOC_00000047	.	-	68.22	-0.1018	0.5944	0.713	0.9474
1	149108	149179	RLOC_00000047	.	-	9.24	-0.1048	0.7145	0.8061	0.9474
1	149179	149697	RLOC_00000047	.	-	33.11	0.1546	0.372	0.5148	0.9474
1	156643	158113	RLOC_00000051	.	-	4304.19	-0.3375	0.0008996	0.008197	0.02087
1	158113	158663	RLOC_00000051	.	-	1022.24	0.3496	0.0009608	0.008573	0.02087
1	159707	159992	RLOC_00000052	.	-	127.45	-0.5889	0.001253	0.01026	0.02684
1	160078	160501	RLOC_00000052	.	-	233.98	-0.3174	0.003246	0.01951	0.02684
1	160566	162280	RLOC_00000052	.	-	692.24	0.2208	0.008846	0.03834	0.02684
1	162486	162686	RLOC_00000052	.	-	78.71	0.5165	0.01332	0.05059	0.02684
1	162686	162742	RLOC_00000052	.	-	13.10	1.3912	0.002131	0.01469	0.02684
1	163401	163516	RLOC_00000053	.	+	38.90	0.0399	0.169	0.2956	0.0729
1	163933	164135	RLOC_00000053	.	+	66.79	0.2940	0.01416	0.05268	0.0729
1	164224	164686	RLOC_00000053	.	+	143.54	0.1113	0.02112	0.06944	0.0729
1	164770	166290	RLOC_00000053	.	+	445.05	-0.3501	0.004597	0.02462	0.0729
1	172316	172512	RLOC_00000058	.	+	10.99	0.1019	0.7901	0.8615	1
1	172620	172814	RLOC_00000058	.	+	7.81	-0.1277	0.8133	0.8781	1
1	180082	181018	RLOC_00000060	.	-	3078.27	-0.2036	0.0009147	0.008289	0.02113
1	181018	181085	RLOC_00000060	.	-	18.47	1.1742	0.006541	0.03128	0.02113
1	181085	182353	RLOC_00000060	.	-	1191.85	0.1669	0.001634	0.01227	0.02113
1	185140	186009	RLOC_00000061	.	+	609.40	0.1104	0.3584	0.502	0.9411
1	186337	186947	RLOC_00000061	.	+	350.83	-0.1184	0.3624	0.5058	0.9411
1	187187	187823	RLOC_00000062	.	+	400.80	0.7124	0.00338	0.02005	0.0005998
1	188009	188177	RLOC_00000062	.	+	187.87	0.9704	0.0001413	0.002294	0.0005998
1	188283	188416	RLOC_00000062	.	+	122.06	0.8897	0.0002506	0.003439	0.0005998
1	188527	189321	RLOC_00000062	.	+	643.65	0.5168	0.0002271	0.003203	0.0005998
1	189561	189675	RLOC_00000062	.	+	272.41	0.1018	0.7879	0.8599	0.0005998
1	189764	190140	RLOC_00000062	.	+	322.31	0.0041	0.5241	0.6542	0.0005998
1	190140	190244	RLOC_00000062	.	+	11.98	0.7773	0.1542	0.2772	0.0005998
1	190529	190828	RLOC_00000062	.	+	102.51	-0.7869	0.0002536	0.003466	0.0005998
1	190940	190998	RLOC_00000062	.	+	74.95	-0.8833	8.54e-06	0.0002842	0.0005998
1	191137	191258	RLOC_00000062	.	+	87.31	-0.6875	1.187e-05	0.0003681	0.0005998
1	191340	191475	RLOC_00000062	.	+	79.70	-0.4941	0.01208	0.04738	0.0005998
1	191578	191692	RLOC_00000062	.	+	76.67	-0.7979	0.001594	0.01206	0.0005998
1	191779	191890	RLOC_00000062	.	+	98.12	-1.3560	0.001143	0.009639	0.0005998
1	191965	192049	RLOC_00000062	.	+	94.72	-1.2717	0.001638	0.01229	0.0005998
1	192106	192421	RLOC_00000062	.	+	107.83	-1.1833	0.0005393	0.005776	0.0005998
1	195763	196543	RLOC_00000064	.	+	1050.16	0.2544	0.003351	0.01994	0.05719
1	197112	197220	RLOC_00000064	.	+	461.59	-0.0085	0.9515	0.971	0.05719
1	197294	197422	RLOC_00000064	.	+	431.68	0.0030	0.7922	0.863	0.05719
1	197499	197674	RLOC_00000064	.	+	491.95	0.0131	0.639	0.7485	0.05719
1	197774	198701	RLOC_00000064	.	+	1231.96	-0.2602	0.003459	0.02036	0.05719
1	199657	199763	RLOC_00000065	.	+	460.41	0.0811	0.01058	0.04326	0.01274
1	199763	199818	RLOC_00000065	.	+	37.50	0.3395	0.08612	0.1839	0.01274
1	199818	199997	RLOC_00000065	.	+	788.74	0.1519	0.0004722	0.005298	0.01274
1	199997	201755	RLOC_00000065	.	+	5103.11	-0.2880	0.0008908	0.008139	0.01274
1	205015	205078	RLOC_00000067	.	+	3.81	0.3304	0.6357	0.7459	0.5203
1	205331	205700	RLOC_00000067	.	+	21.96	0.5981	0.07458	0.1663	0.5203
1	205700	205949	RLOC_00000067	.	+	16.08	0.1756	0.637	0.747	0.5203
1	206691	206762	RLOC_00000067	.	+	11.32	-0.2423	0.7726	0.8491	0.5203
1	206868	207229	RLOC_00000067	.	+	27.16	-0.2962	0.1082	0.2157	0.5203
1	207324	207461	RLOC_00000067	.	+	11.86	-0.5099	0.5245	0.6546	0.5203
1	209447	209608	RLOC_00000068	.	+	10.96	0.2199	0.1225	0.2354	0.4612
1	209763	209850	RLOC_00000068	.	+	10.69	0.3386	0.1186	0.2301	0.4612
1	209969	210118	RLOC_00000068	.	+	15.52	0.5095	0.2608	0.4009	0.4612
1	210436	210517	RLOC_00000068	.	+	11.13	0.0313	0.8744	0.9203	0.4612
1	210517	210619	RLOC_00000068	.	+	11.26	0.6986	0.06043	0.1436	0.4612
1	211053	211379	RLOC_00000068	.	+	24.89	0.1367	0.3623	0.5056	0.4612
1	211473	211717	RLOC_00000068	.	+	22.14	-0.1859	0.8814	0.9249	0.4612
1	211854	212573	RLOC_00000068	.	+	51.39	-0.3684	0.1989	0.3318	0.4612
1	212670	213030	RLOC_00000068	.	+	30.86	-0.4291	0.09655	0.1992	0.4612
1	219176	219616	RLOC_00000070	.	+	30.23	-0.0446	0.8145	0.8791	1
1	219751	221113	RLOC_00000070	.	+	98.01	0.0281	0.8272	0.8879	1
1	221731	222361	RLOC_00000071	.	-	1180.52	-0.6238	0.001478	0.01146	0.004212
1	222614	223417	RLOC_00000071	.	-	1199.32	-0.0980	0.4808	0.6166	0.004212
1	223538	223867	RLOC_00000071	.	-	725.55	0.2159	0.0001078	0.001901	0.004212
1	223944	224338	RLOC_00000071	.	-	546.29	0.2038	0.00421	0.02318	0.004212
1	229023	229344	RLOC_00000073	.	+	392.18	0.1643	0.1271	0.2416	0.000171
1	229427	229724	RLOC_00000073	.	+	767.82	-0.0270	0.618	0.732	0.000171
1	229826	229935	RLOC_00000073	.	+	523.35	0.0046	0.9014	0.9384	0.000171
1	229935	230076	RLOC_00000073	.	+	12.05	0.0324	0.5861	0.7062	0.000171
1	230303	230459	RLOC_00000073	.	+	559.78	-0.0390	0.596	0.7143	0.000171
1	230556	230838	RLOC_00000073	.	+	411.98	-0.0829	0.595	0.7135	0.000171
1	231315	231400	RLOC_00000073	.	+	3.23	14.6802	1.852e-06	8.139e-05	0.000171
1	231002	231655	RLOC_00000074	.	-	102.17	-0.0219	0.8158	0.88	1
1	231783	231928	RLOC_00000074	.	-	37.27	0.0341	0.8226	0.8847	1
1	232935	233298	RLOC_00000075	.	-	188.55	-0.1867	0.1358	0.2532	0.0007687
1	233385	233470	RLOC_00000075	.	-	192.21	-0.3256	0.0001872	0.002803	0.0007687
1	233470	233546	RLOC_00000075	.	-	4.85	0.3050	0.5175	0.6486	0.0007687
1	233546	234092	RLOC_00000075	.	-	208.75	-0.3378	0.0002764	0.003674	0.0007687
1	234247	234528	RLOC_00000075	.	-	257.33	-0.1787	0.02063	0.06826	0.0007687
1	234528	234622	RLOC_00000075	.	-	179.24	0.0269	0.8488	0.9027	0.0007687
1	234622	234684	RLOC_00000075	.	-	3.28	-0.3059	0.7089	0.802	0.0007687
1	234934	234988	RLOC_00000075	.	-	145.76	0.0550	0.7064	0.8002	0.0007687
1	235196	235360	RLOC_00000075	.	-	175.44	0.0954	0.5498	0.6761	0.0007687
1	235844	236027	RLOC_00000075	.	-	137.14	0.1612	0.2272	0.3639	0.0007687
1	236144	236298	RLOC_00000075	.	-	103.47	0.3599	0.004781	0.02531	0.0007687
1	236428	236548	RLOC_00000075	.	-	86.94	0.6432	1.171e-05	0.0003642	0.0007687
1	236672	236784	RLOC_00000075	.	-	79.02	0.6843	0.01332	0.05059	0.0007687
1	236864	237023	RLOC_00000075	.	-	132.61	0.3459	0.06384	0.1491	0.0007687
1	237502	237786	RLOC_00000075	.	-	118.54	0.0725	0.6008	0.7182	0.0007687
1	242972	243128	RLOC_00000076	.	-	9.33	-0.0371	0.8226	0.8847	0.106
1	243335	243746	RLOC_00000076	.	-	23.02	-0.3870	0.02023	0.06736	0.106
1	244034	244085	RLOC_00000076	.	-	4.86	-0.3577	0.5454	0.6724	0.106
1	244521	244635	RLOC_00000076	.	-	5.28	1.3496	0.007531	0.03435	0.106
1	244777	244869	RLOC_00000076	.	-	4.23	0.6564	0.3424	0.4863	0.106
1	245150	245264	RLOC_00000076	.	-	6.04	0.3279	0.2963	0.4389	0.106
1	249105	249306	RLOC_00000078	.	+	10.78	0.4983	0.3297	0.4733	0.0001214
1	249542	249693	RLOC_00000078	.	+	16.21	0.1522	0.5904	0.7097	0.0001214
1	249773	249930	RLOC_00000078	.	+	15.21	0.4270	0.1341	0.2509	0.0001214
1	250013	250151	RLOC_00000078	.	+	20.36	0.2835	0.2965	0.4391	0.0001214
1	250535	250588	RLOC_00000078	.	+	16.85	0.1408	0.6777	0.7785	0.0001214
1	250668	250863	RLOC_00000078	.	+	29.33	0.0616	0.6202	0.7337	0.0001214
1	251003	251066	RLOC_00000078	.	+	20.15	-0.6081	0.04349	0.1143	0.0001214
1	251259	251316	RLOC_00000078	.	+	24.59	-0.2752	0.4688	0.6059	0.0001214
1	251538	251594	RLOC_00000078	.	+	23.73	-0.2954	0.2679	0.4086	0.0001214
1	251679	251827	RLOC_00000078	.	+	35.62	-0.4476	0.1045	0.2105	0.0001214
1	251921	252006	RLOC_00000078	.	+	25.98	-0.7037	0.03668	0.1017	0.0001214
1	252120	252412	RLOC_00000078	.	+	25.92	-0.7372	0.01507	0.05499	0.0001214
1	253298	253354	RLOC_00000078	.	+	3.84	1.1290	0.07854	0.1723	0.0001214
1	253530	253679	RLOC_00000078	.	+	5.23	3.8433	1.211e-06	5.715e-05	0.0001214
1	253774	253828	RLOC_00000078	.	+	3.65	3.3281	0.001585	0.01203	0.0001214
1	254043	254256	RLOC_00000078	.	+	8.24	1.6650	0.003215	0.01939	0.0001214
1	254256	254448	RLOC_00000078	.	+	6.69	1.6644	0.004457	0.02408	0.0001214
1	258823	259094	RLOC_00000081	.	+	40.03	0.3586	0.1608	0.2855	0.002453
1	259094	259205	RLOC_00000081	.	+	10.73	-1.4892	0.0005036	0.005526	0.002453
1	260143	260421	RLOC_00000081	.	+	8.12	0.1545	0.4305	0.5706	0.002453
1	260948	260998	RLOC_00000081	.	+	5.76	0.3561	0.4625	0.6001	0.002453
1	261337	261498	RLOC_00000081	.	+	5.63	-0.1364	0.8358	0.8938	0.002453
1	262854	263044	RLOC_00000081	.	+	98.05	0.7149	0.0005394	0.005776	0.002453
1	263044	263231	RLOC_00000081	.	+	130.99	0.5360	0.0007906	0.007495	0.002453
1	263231	263300	RLOC_00000081	.	+	148.12	0.4160	0.002244	0.01521	0.002453
1	263366	263643	RLOC_00000081	.	+	194.48	0.4256	9.031e-05	0.001673	0.002453
1	263643	263770	RLOC_00000081	.	+	185.16	0.2644	0.01736	0.06065	0.002453
1	263856	263935	RLOC_00000081	.	+	154.86	0.2837	0.04614	0.1192	0.002453
1	264071	264160	RLOC_00000081	.	+	164.25	0.1898	0.1235	0.2368	0.002453
1	264279	264392	RLOC_00000081	.	+	190.69	0.0993	0.2551	0.3946	0.002453
1	264519	264582	RLOC_00000081	.	+	169.15	0.0410	0.6685	0.7715	0.002453
1	264656	264712	RLOC_00000081	.	+	158.49	-0.0127	0.9711	0.9831	0.002453
1	264796	264901	RLOC_00000081	.	+	205.16	-0.0879	0.3988	0.5407	0.002453
1	265019	265106	RLOC_00000081	.	+	200.42	-0.1645	0.1324	0.2486	0.002453
1	265175	265441	RLOC_00000081	.	+	299.63	-0.3380	5.283e-05	0.001136	0.002453
1	265441	265626	RLOC_00000081	.	+	259.58	-0.3608	0.0007286	0.007095	0.002453
1	265776	265845	RLOC_00000081	.	+	237.55	-0.4063	0.001222	0.01008	0.002453
1	265948	266214	RLOC_00000081	.	+	288.27	-0.4470	0.03938	0.1067	0.002453
1	266214	266469	RLOC_00000081	.	+	14.66	0.6626	0.04594	0.1188	0.002453
1	266469	266724	RLOC_00000081	.	+	45.72	-0.1634	0.5067	0.639	0.002453
1	266724	267281	RLOC_00000081	.	+	33.74	0.9884	9.894e-05	0.001786	0.002453
1	267281	267798	RLOC_00000081	.	+	94.80	-0.4252	0.01415	0.05265	0.002453
1	259806	259884	RLOC_00000082	.	-	3.30	0.5513	0.3355	0.4792	0.9298
1	259982	260034	RLOC_00000082	.	-	5.93	-0.3497	0.581	0.7021	0.9298
1	260151	260397	RLOC_00000082	.	-	8.89	-0.1310	0.8629	0.9124	0.9298
1	260766	260824	RLOC_00000082	.	-	4.43	0.1620	0.991	0.9952	0.9298
1	260920	260994	RLOC_00000082	.	-	3.89	0.0225	0.8711	0.9179	0.9298
1	269781	270351	RLOC_00000085	.	-	322.84	-0.3699	0.0007838	0.007452	2.001e-05
1	270610	270765	RLOC_00000085	.	-	224.56	-0.4015	0.0007222	0.007058	2.001e-05
1	271890	272362	RLOC_00000085	.	-	87.25	-0.2185	0.3851	0.5276	2.001e-05
1	272444	272555	RLOC_00000085	.	-	50.43	-0.1146	0.7364	0.8229	2.001e-05
1	272650	272983	RLOC_00000085	.	-	82.13	-0.0272	0.8951	0.9343	2.001e-05
1	273063	273149	RLOC_00000085	.	-	33.18	0.4750	0.02006	0.06698	2.001e-05
1	273149	273232	RLOC_00000085	.	-	15.46	1.4458	0.0003884	0.004646	2.001e-05
1	273232	273339	RLOC_00000085	.	-	37.48	0.6082	0.001245	0.0102	2.001e-05
1	273428	273562	RLOC_00000085	.	-	38.56	0.6820	0.01184	0.04676	2.001e-05
1	273652	273788	RLOC_00000085	.	-	39.66	0.4829	0.03296	0.09445	2.001e-05
1	273862	274083	RLOC_00000085	.	-	46.21	0.3842	0.06981	0.1587	2.001e-05
1	274166	274289	RLOC_00000085	.	-	33.83	0.2982	0.1239	0.2374	2.001e-05
1	274383	274728	RLOC_00000085	.	-	49.34	0.5401	0.01935	0.06535	2.001e-05
1	274821	274930	RLOC_00000085	.	-	3.42	5.1341	1.497e-07	9.287e-06	2.001e-05
1	270959	271289	RLOC_00000086	.	+	312.69	0.1954	0.01128	0.04521	0.144
1	271378	271433	RLOC_00000086	.	+	179.27	0.0104	0.865	0.9139	0.144
1	271433	271540	RLOC_00000086	.	+	6.36	-0.9591	0.03829	0.1047	0.144
1	271540	272009	RLOC_00000086	.	+	428.41	-0.1573	0.03145	0.09137	0.144
1	275631	275700	RLOC_00000087	.	+	9.81	0.7320	0.06561	0.152	0.484
1	275700	275897	RLOC_00000087	.	+	28.26	-0.0671	0.6051	0.7217	0.484
1	275972	276189	RLOC_00000087	.	+	28.05	-0.2699	0.507	0.6392	0.484
1	275506	275618	RLOC_00000088	.	-	5.33	-0.2835	0.7944	0.8648	0.3757
1	275675	275978	RLOC_00000088	.	-	44.68	-0.1039	0.6805	0.7807	0.3757
1	276114	276317	RLOC_00000088	.	-	23.26	-0.3898	0.1874	0.3182	0.3757
1	276404	276519	RLOC_00000088	.	-	22.68	0.1749	0.551	0.6771	0.3757
1	276622	276793	RLOC_00000088	.	-	26.04	0.2427	0.238	0.3759	0.3757
1	276869	276989	RLOC_00000088	.	-	26.04	-0.2035	0.4672	0.6044	0.3757
1	277076	277153	RLOC_00000088	.	-	25.92	-0.2800	0.6835	0.783	0.3757
1	277231	277401	RLOC_00000088	.	-	39.29	-0.1199	0.9982	0.9998	0.3757
1	277492	277606	RLOC_00000088	.	-	33.86	-0.0256	0.9141	0.9466	0.3757
1	277716	277863	RLOC_00000088	.	-	31.31	-0.0062	0.8784	0.9229	0.3757
1	277946	278252	RLOC_00000088	.	-	40.95	0.3766	0.04346	0.1142	0.3757
1	278315	278440	RLOC_00000088	.	-	18.69	0.0228	0.8807	0.9244	0.3757
1	278593	278809	RLOC_00000090	.	+	99.31	0.4472	0.02053	0.06802	0.001748
1	278886	279088	RLOC_00000090	.	+	147.20	0.3893	0.02667	0.08147	0.001748
1	279165	279240	RLOC_00000090	.	+	94.60	0.6775	0.002228	0.01514	0.001748
1	279326	279426	RLOC_00000090	.	+	106.92	0.5521	0.004257	0.02335	0.001748
1	279796	280088	RLOC_00000090	.	+	176.68	0.6466	0.000164	0.002546	0.001748
1	280179	280370	RLOC_00000090	.	+	141.55	0.6097	0.004974	0.026	0.001748
1	280448	280568	RLOC_00000090	.	+	102.54	0.3259	0.07156	0.1616	0.001748
1	280654	280888	RLOC_00000090	.	+	111.46	0.2286	0.05309	0.1313	0.001748
1	280888	281121	RLOC_00000090	.	+	205.62	0.3686	0.001067	0.009213	0.001748
1	281437	281536	RLOC_00000090	.	+	174.80	0.3260	0.0261	0.08027	0.001748
1	281758	282285	RLOC_00000090	.	+	314.63	0.0203	0.6106	0.7261	0.001748
1	282483	282766	RLOC_00000090	.	+	170.53	-0.2455	0.363	0.5063	0.001748
1	282766	283056	RLOC_00000090	.	+	288.07	-0.7741	0.0003214	0.004078	0.001748
1	283056	283131	RLOC_00000090	.	+	13.66	-0.1850	0.668	0.7711	0.001748
1	283131	283232	RLOC_00000090	.	+	221.47	-0.3549	0.006648	0.03161	0.001748
1	283312	283443	RLOC_00000090	.	+	171.96	-0.2555	0.05927	0.1417	0.001748
1	283443	283533	RLOC_00000090	.	+	222.90	-0.2854	0.02015	0.06718	0.001748
1	283812	284252	RLOC_00000090	.	+	376.82	-0.6575	3.379e-05	0.0008148	0.001748
1	284477	286351	RLOC_00000091	.	+	1389.58	0.6462	0.0002032	0.002969	0.0005156
1	286450	286623	RLOC_00000091	.	+	282.46	0.3972	0.0103	0.04247	0.0005156
1	286699	286808	RLOC_00000091	.	+	190.40	0.3386	0.01467	0.05397	0.0005156
1	286924	286996	RLOC_00000091	.	+	28.43	0.6712	0.05524	0.1349	0.0005156
1	286996	287133	RLOC_00000091	.	+	250.87	0.2842	0.007602	0.03456	0.0005156
1	287219	287280	RLOC_00000091	.	+	229.08	0.1087	0.2814	0.4233	0.0005156
1	287394	287514	RLOC_00000091	.	+	308.30	0.2212	0.03213	0.09275	0.0005156
1	287640	287710	RLOC_00000091	.	+	249.72	0.1342	0.1378	0.2558	0.0005156
1	287788	287854	RLOC_00000091	.	+	242.51	0.2295	0.04552	0.118	0.0005156
1	288085	288176	RLOC_00000091	.	+	309.36	0.1446	0.1641	0.2895	0.0005156
1	288176	288251	RLOC_00000091	.	+	14.75	0.6954	0.08646	0.1844	0.0005156
1	288251	288505	RLOC_00000091	.	+	398.31	0.0058	0.6076	0.7236	0.0005156
1	288591	288722	RLOC_00000091	.	+	435.71	-0.0102	0.8519	0.9048	0.0005156
1	288880	289235	RLOC_00000091	.	+	588.50	0.1695	0.1203	0.2324	0.0005156
1	289235	289386	RLOC_00000091	.	+	499.39	0.0559	0.3634	0.5066	0.0005156
1	289536	289592	RLOC_00000091	.	+	407.74	-0.0244	0.902	0.9387	0.0005156
1	289715	289776	RLOC_00000091	.	+	441.61	-0.2570	0.007079	0.03298	0.0005156
1	290026	290346	RLOC_00000091	.	+	882.62	-0.4437	0.000906	0.008236	0.0005156
1	290438	290501	RLOC_00000091	.	+	588.25	-0.5916	0.0001588	0.00249	0.0005156
1	290573	290652	RLOC_00000091	.	+	616.66	-0.6531	7.095e-06	0.0002446	0.0005156
1	290745	291147	RLOC_00000091	.	+	603.06	-0.7259	0.0005305	0.005711	0.0005156
1	293344	293499	RLOC_00000093	.	+	174.23	0.2899	0.008991	0.03875	0.03964
1	293499	293754	RLOC_00000093	.	+	779.18	0.0683	0.06489	0.1509	0.03964
1	294049	294121	RLOC_00000093	.	+	616.91	0.0679	0.02431	0.07647	0.03964
1	294204	294386	RLOC_00000093	.	+	895.97	-0.0223	0.1855	0.316	0.03964
1	294457	294508	RLOC_00000093	.	+	4.21	1.2390	0.03495	0.09841	0.03964
1	294508	295083	RLOC_00000093	.	+	1338.81	-0.4203	0.002084	0.01448	0.03964
1	295962	296248	RLOC_00000095	.	-	650.01	-0.2975	0.02019	0.06726	0.03668
1	296357	296538	RLOC_00000095	.	-	964.24	-0.1821	0.06999	0.159	0.03668
1	296625	296701	RLOC_00000095	.	-	531.55	-0.0813	0.3577	0.5012	0.03668
1	296701	296862	RLOC_00000095	.	-	449.48	-0.0040	0.8934	0.9331	0.03668
1	296862	296950	RLOC_00000095	.	-	17.77	0.7875	0.1311	0.247	0.03668
1	296950	297177	RLOC_00000095	.	-	546.43	0.1084	0.08401	0.1807	0.03668
1	297531	297744	RLOC_00000095	.	-	534.92	0.2860	0.001884	0.01352	0.03668
1	298012	298185	RLOC_00000095	.	-	235.49	0.3073	0.01891	0.06434	0.03668
1	298576	300515	RLOC_00000096	.	-	631.83	-0.5594	0.002525	0.01646	0.01381
1	300602	300665	RLOC_00000096	.	-	33.82	0.2854	0.0005247	0.005675	0.01381
1	300751	300826	RLOC_00000096	.	-	28.20	0.1435	0.07594	0.1684	0.01381
1	301487	301544	RLOC_00000096	.	-	14.79	0.1309	0.1017	0.2064	0.01381
1	302053	302227	RLOC_00000096	.	-	14.25	0.4123	0.02129	0.06977	0.01381
1	304127	304808	RLOC_00000099	.	-	289.69	-0.4702	0.005056	0.02631	0.07859
1	304879	304964	RLOC_00000099	.	-	113.15	-0.1047	0.662	0.7664	0.07859
1	305034	305097	RLOC_00000099	.	-	92.10	0.0238	0.6988	0.7945	0.07859
1	305173	305258	RLOC_00000099	.	-	100.37	0.1586	0.1829	0.3128	0.07859
1	305346	305443	RLOC_00000099	.	-	81.68	0.1180	0.3529	0.4965	0.07859
1	305525	305702	RLOC_00000099	.	-	88.99	0.1478	0.3901	0.5325	0.07859
1	305784	306267	RLOC_00000099	.	-	142.41	0.3145	0.02085	0.0688	0.07859
1	306542	306800	RLOC_00000102	.	-	20.22	0.0169	0.9604	0.9768	0.2211
1	306892	307114	RLOC_00000102	.	-	19.90	-0.0010	0.9053	0.9409	0.2211
1	307212	307359	RLOC_00000102	.	-	12.72	-0.3169	0.6138	0.7286	0.2211
1	307476	307805	RLOC_00000102	.	-	25.81	-0.2992	0.5656	0.6895	0.2211
1	307888	308070	RLOC_00000102	.	-	20.26	-0.1891	0.3915	0.5338	0.2211
1	308147	308318	RLOC_00000102	.	-	14.46	0.0918	0.8846	0.9272	0.2211
1	308402	308573	RLOC_00000102	.	-	13.69	0.1680	0.4679	0.6051	0.2211
1	308814	309074	RLOC_00000102	.	-	11.74	0.7960	0.0201	0.06706	0.2211
1	310314	310368	RLOC_00000104	.	+	6.81	0.8694	0.01424	0.05286	0.008504
1	310368	310981	RLOC_00000104	.	+	57.73	0.3353	0.002225	0.01512	0.008504
1	311336	313116	RLOC_00000104	.	+	245.19	-0.3178	0.0002763	0.003674	0.008504
1	313163	313761	RLOC_00000106	.	-	401.25	-0.2722	0.1155	0.2258	0.3998
1	313879	313997	RLOC_00000106	.	-	219.55	-0.0940	0.4181	0.5589	0.3998
1	314086	314226	RLOC_00000106	.	-	293.44	-0.0496	0.6827	0.7823	0.3998
1	314439	314551	RLOC_00000106	.	-	311.14	-0.0152	0.8489	0.9028	0.3998
1	314651	314802	RLOC_00000106	.	-	349.90	0.0147	0.7841	0.8572	0.3998
1	314889	315016	RLOC_00000106	.	-	339.73	0.1338	0.2168	0.3522	0.3998
1	315575	315891	RLOC_00000106	.	-	348.22	0.2843	0.04789	0.1223	0.3998
1	316163	316257	RLOC_00000108	.	+	52.99	0.3438	0.1636	0.2889	0.05979
1	316343	316440	RLOC_00000108	.	+	75.88	0.5653	0.003548	0.02069	0.05979
1	316537	316713	RLOC_00000108	.	+	102.67	0.4398	0.03071	0.08991	0.05979
1	316791	316897	RLOC_00000108	.	+	70.52	0.0768	0.5287	0.6582	0.05979
1	317006	317090	RLOC_00000108	.	+	79.51	0.2183	0.1884	0.3194	0.05979
1	317293	317439	RLOC_00000108	.	+	107.71	0.1707	0.2273	0.3641	0.05979
1	317552	317642	RLOC_00000108	.	+	92.61	0.1136	0.4737	0.6103	0.05979
1	317759	317845	RLOC_00000108	.	+	101.04	-0.1439	0.2804	0.4223	0.05979
1	317845	318040	RLOC_00000108	.	+	112.50	-0.1201	0.2961	0.4387	0.05979
1	318143	318205	RLOC_00000108	.	+	93.58	-0.1881	0.1632	0.2884	0.05979
1	318360	318433	RLOC_00000108	.	+	87.30	-0.0626	0.6072	0.7234	0.05979
1	318564	319101	RLOC_00000108	.	+	232.12	-0.1128	0.3271	0.4708	0.05979
1	319203	319300	RLOC_00000108	.	+	132.78	-0.2841	0.07774	0.1712	0.05979
1	319370	319640	RLOC_00000108	.	+	150.42	-0.1846	0.2913	0.4338	0.05979
1	319845	320146	RLOC_00000109	.	-	146.47	-0.2229	0.05662	0.1373	0.01205
1	320379	320457	RLOC_00000109	.	-	103.03	-0.2434	0.02623	0.08053	0.01205
1	320768	321422	RLOC_00000109	.	-	255.69	-0.1703	0.01907	0.0647	0.01205
1	321627	321750	RLOC_00000109	.	-	4.14	1.1014	0.06806	0.1559	0.01205
1	321750	321865	RLOC_00000109	.	-	82.74	-0.0250	0.8487	0.9027	0.01205
1	321957	322406	RLOC_00000109	.	-	145.35	0.4478	0.0004379	0.005035	0.01205
1	322512	322858	RLOC_00000109	.	-	95.87	0.5410	0.002712	0.01725	0.01205
1	323207	323282	RLOC_00000110	.	+	57.42	0.2418	0.1854	0.3159	0.0883
1	323678	323840	RLOC_00000110	.	+	122.50	0.3030	0.006658	0.03164	0.0883
1	324257	324416	RLOC_00000110	.	+	159.63	-0.0554	0.5271	0.6568	0.0883
1	324635	324914	RLOC_00000110	.	+	172.90	-0.2851	0.005906	0.02922	0.0883
1	325374	325641	RLOC_00000111	.	+	47.39	0.5903	0.004909	0.02576	0.003056
1	325912	326013	RLOC_00000111	.	+	46.36	0.4177	0.05169	0.1288	0.003056
1	326105	326228	RLOC_00000111	.	+	46.36	0.4685	0.02494	0.07778	0.003056
1	326331	326517	RLOC_00000111	.	+	64.72	0.3412	0.01351	0.05107	0.003056
1	326593	326815	RLOC_00000111	.	+	67.90	0.2298	0.09454	0.1962	0.003056
1	326930	327084	RLOC_00000111	.	+	68.14	0.4081	0.01708	0.05999	0.003056
1	327236	327386	RLOC_00000111	.	+	71.02	0.5920	0.0001221	0.002072	0.003056
1	327487	327576	RLOC_00000111	.	+	52.62	0.5491	0.001148	0.009673	0.003056
1	327662	327866	RLOC_00000111	.	+	89.44	0.0689	0.6659	0.7695	0.003056
1	327999	328108	RLOC_00000111	.	+	82.26	-0.1215	0.599	0.7167	0.003056
1	328186	328322	RLOC_00000111	.	+	74.32	-0.1115	0.8837	0.9265	0.003056
1	328423	328555	RLOC_00000111	.	+	76.77	0.1821	0.3018	0.4445	0.003056
1	328897	329030	RLOC_00000111	.	+	94.45	0.1404	0.2229	0.3592	0.003056
1	329118	329211	RLOC_00000111	.	+	81.36	0.0144	0.6012	0.7186	0.003056
1	329310	329500	RLOC_00000111	.	+	106.20	-0.0839	0.6875	0.7859	0.003056
1	329552	329703	RLOC_00000111	.	+	117.10	-0.3596	0.02425	0.07633	0.003056
1	329780	329926	RLOC_00000111	.	+	150.37	-0.5550	7.091e-05	0.001403	0.003056
1	330026	330155	RLOC_00000111	.	+	144.95	-0.6175	0.0001102	0.001931	0.003056
1	330241	330467	RLOC_00000111	.	+	126.56	-0.5296	0.008561	0.03749	0.003056
1	330601	332184	RLOC_00000112	.	-	1305.51	-0.5850	0.0002791	0.0037	0.00857
1	332274	332633	RLOC_00000112	.	-	310.84	0.0884	0.08794	0.1865	0.00857
1	332723	333045	RLOC_00000112	.	-	290.91	-0.1667	0.7366	0.823	0.00857
1	333128	333629	RLOC_00000112	.	-	412.38	-0.1819	0.9358	0.961	0.00857
1	333903	334178	RLOC_00000112	.	-	219.66	0.0013	0.1171	0.228	0.00857
1	334470	334765	RLOC_00000112	.	-	172.64	0.1301	0.02719	0.08258	0.00857
1	334898	335321	RLOC_00000112	.	-	241.35	0.1985	0.00337	0.02001	0.00857
1	335418	335773	RLOC_00000112	.	-	176.45	0.2730	0.001106	0.00943	0.00857
1	335915	336233	RLOC_00000112	.	-	160.26	0.4190	0.001591	0.01205	0.00857
1	336416	337719	RLOC_00000112	.	-	523.64	0.2773	0.005059	0.02632	0.00857
1	337719	337776	RLOC_00000112	.	-	27.21	0.4560	0.04129	0.1103	0.00857
1	338278	338987	RLOC_00000113	.	+	275.50	0.2958	0.001744	0.01283	0.03074
1	339124	340068	RLOC_00000113	.	+	541.44	-0.2625	0.001501	0.01159	0.03074
1	347902	348127	RLOC_00000117	.	+	23.96	0.0537	0.6391	0.7486	4.056e-11
1	348211	348267	RLOC_00000117	.	+	20.37	0.2566	0.4017	0.5433	4.056e-11
1	348372	348454	RLOC_00000117	.	+	23.29	0.3935	0.1778	0.3066	4.056e-11
1	348561	348640	RLOC_00000117	.	+	24.82	0.6217	0.1026	0.2078	4.056e-11
1	348734	348785	RLOC_00000117	.	+	24.21	0.1986	0.3514	0.4951	4.056e-11
1	348879	348976	RLOC_00000117	.	+	28.14	0.2859	0.3138	0.457	4.056e-11
1	349237	349366	RLOC_00000117	.	+	31.94	0.5902	0.01686	0.05945	4.056e-11
1	349549	349720	RLOC_00000117	.	+	37.02	0.1548	0.7509	0.8333	4.056e-11
1	349802	349886	RLOC_00000117	.	+	33.82	-0.1592	0.2777	0.4193	4.056e-11
1	350048	350147	RLOC_00000117	.	+	33.12	0.3732	0.2041	0.3379	4.056e-11
1	350225	350296	RLOC_00000117	.	+	41.70	-0.1076	0.4661	0.6034	4.056e-11
1	350473	350570	RLOC_00000117	.	+	45.63	-0.2105	0.2733	0.4147	4.056e-11
1	350657	350783	RLOC_00000117	.	+	57.95	-0.4261	0.01102	0.04448	4.056e-11
1	350870	350966	RLOC_00000117	.	+	64.31	-0.0342	0.8793	0.9235	4.056e-11
1	351043	351160	RLOC_00000117	.	+	65.39	-0.0854	0.391	0.5332	4.056e-11
1	351251	351329	RLOC_00000117	.	+	65.79	-0.0140	0.7467	0.8301	4.056e-11
1	351410	351632	RLOC_00000117	.	+	96.32	-0.2566	0.0372	0.1027	4.056e-11
1	351711	351819	RLOC_00000117	.	+	56.99	-0.7123	0.00014	0.002282	4.056e-11
1	351911	352001	RLOC_00000117	.	+	53.61	-0.4858	0.001006	0.008854	4.056e-11
1	352125	352469	RLOC_00000117	.	+	83.02	-0.7670	0.002954	0.01831	4.056e-11
1	352845	353344	RLOC_00000117	.	+	14.98	3.1494	1.262e-09	1.209e-07	4.056e-11
1	353396	353909	RLOC_00000117	.	+	22.02	2.9339	1.275e-13	1.936e-11	4.056e-11
1	353909	355097	RLOC_00000117	.	+	46.58	2.5012	3.139e-09	2.813e-07	4.056e-11
1	352662	353162	RLOC_00000118	.	-	197.47	-0.2462	0.02268	0.07297	0.2412
1	353237	354826	RLOC_00000118	.	-	479.01	0.1695	0.02271	0.07302	0.2412
1	355379	355448	RLOC_00000118	.	-	2.69	0.7568	0.2488	0.3877	0.2412
1	359054	360149	RLOC_00000119	.	-	258.84	-0.3276	6.804e-05	0.001363	0.002969
1	360239	360776	RLOC_00000119	.	-	89.35	0.1191	0.5786	0.7004	0.002969
1	360889	361331	RLOC_00000119	.	-	95.81	-0.0032	0.9127	0.9459	0.002969
1	361331	363105	RLOC_00000119	.	-	240.33	0.3562	0.0004626	0.005226	0.002969
1	365873	366292	RLOC_00000120	.	+	26.56	-0.3217	0.1289	0.244	0.6831
1	366722	366859	RLOC_00000120	.	+	15.83	0.2548	0.243	0.3814	0.6831
1	366985	367144	RLOC_00000120	.	+	12.17	0.1873	0.453	0.5914	0.6831
1	373509	373786	RLOC_00000124	.	+	91.48	0.3696	0.005654	0.02838	7.533e-06
1	373891	374111	RLOC_00000124	.	+	99.54	0.4757	0.01282	0.04928	7.533e-06
1	374111	374189	RLOC_00000124	.	+	62.72	0.4521	0.001369	0.01089	7.533e-06
1	374271	374500	RLOC_00000124	.	+	94.17	0.4716	0.001253	0.01025	7.533e-06
1	374582	374922	RLOC_00000124	.	+	125.07	0.4976	0.0007782	0.007418	7.533e-06
1	375121	375238	RLOC_00000124	.	+	62.54	0.4065	0.01037	0.04266	7.533e-06
1	375324	375453	RLOC_00000124	.	+	75.06	0.5418	0.00117	0.009797	7.533e-06
1	375527	375719	RLOC_00000124	.	+	95.51	0.6097	0.0005939	0.006158	7.533e-06
1	375807	376002	RLOC_00000124	.	+	101.34	0.3154	0.005852	0.02905	7.533e-06
1	376113	376251	RLOC_00000124	.	+	63.38	0.2907	0.02627	0.08061	7.533e-06
1	376351	376403	RLOC_00000124	.	+	48.12	0.0848	0.08391	0.1805	7.533e-06
1	376403	376474	RLOC_00000124	.	+	50.93	0.3995	0.01173	0.04646	7.533e-06
1	376561	376815	RLOC_00000124	.	+	99.20	0.7789	0.0006929	0.006842	7.533e-06
1	376924	377028	RLOC_00000124	.	+	85.03	0.4887	0.01915	0.06489	7.533e-06
1	377210	377305	RLOC_00000124	.	+	109.85	0.3555	0.01397	0.0522	7.533e-06
1	377390	377615	RLOC_00000124	.	+	144.34	0.2726	0.007188	0.03332	7.533e-06
1	377880	378036	RLOC_00000124	.	+	120.39	0.3135	0.005811	0.02892	7.533e-06
1	378117	378191	RLOC_00000124	.	+	93.53	0.4211	0.002558	0.0166	7.533e-06
1	378297	378366	RLOC_00000124	.	+	81.57	0.6895	0.0008809	0.008077	7.533e-06
1	378503	378586	RLOC_00000124	.	+	78.11	0.7339	0.0008231	0.007701	7.533e-06
1	378586	378649	RLOC_00000124	.	+	70.13	0.5367	0.0003934	0.004685	7.533e-06
1	378745	378854	RLOC_00000124	.	+	81.41	0.5895	5.015e-08	3.506e-06	7.533e-06
1	378941	379089	RLOC_00000124	.	+	118.70	0.4964	1.136e-07	7.279e-06	7.533e-06
1	379304	379433	RLOC_00000124	.	+	128.96	0.3297	0.01045	0.04289	7.533e-06
1	379525	379770	RLOC_00000124	.	+	160.68	0.2422	0.01568	0.0565	7.533e-06
1	379864	380003	RLOC_00000124	.	+	131.62	0.3980	0.0009456	0.008473	7.533e-06
1	380085	380174	RLOC_00000124	.	+	113.99	0.3015	0.002556	0.01659	7.533e-06
1	380269	380375	RLOC_00000124	.	+	118.44	0.2892	0.004588	0.02459	7.533e-06
1	380600	380697	RLOC_00000124	.	+	126.75	0.1193	0.02312	0.07389	7.533e-06
1	380845	380999	RLOC_00000124	.	+	155.89	0.3188	0.001939	0.01379	7.533e-06
1	381149	381332	RLOC_00000124	.	+	175.99	0.1819	0.02342	0.07451	7.533e-06
1	381404	381634	RLOC_00000124	.	+	237.80	-0.1247	0.4944	0.6285	7.533e-06
1	381729	381832	RLOC_00000124	.	+	171.34	-0.2364	0.7587	0.8389	7.533e-06
1	381911	382040	RLOC_00000124	.	+	186.56	-0.0673	0.2846	0.4267	7.533e-06
1	382372	382567	RLOC_00000124	.	+	195.05	0.0420	0.1184	0.2298	7.533e-06
1	382802	383130	RLOC_00000124	.	+	223.63	0.0837	0.01936	0.06538	7.533e-06
1	383394	383529	RLOC_00000124	.	+	178.23	0.0876	0.1921	0.3238	7.533e-06
1	383607	383688	RLOC_00000124	.	+	149.05	-0.0313	0.5403	0.668	7.533e-06
1	384083	384230	RLOC_00000124	.	+	191.76	-0.1812	0.63	0.7415	7.533e-06
1	384316	384449	RLOC_00000124	.	+	162.69	-0.2372	0.3276	0.4712	7.533e-06
1	384539	384605	RLOC_00000124	.	+	134.74	-0.2977	0.3459	0.4897	7.533e-06
1	384693	384842	RLOC_00000124	.	+	290.32	-0.4459	0.00621	0.0302	7.533e-06
1	384906	384969	RLOC_00000124	.	+	257.36	-0.5376	0.00101	0.008874	7.533e-06
1	385169	385327	RLOC_00000124	.	+	288.34	-0.4919	0.006934	0.0325	7.533e-06
1	385430	385623	RLOC_00000124	.	+	296.17	-0.5453	0.004174	0.02304	7.533e-06
1	385712	385817	RLOC_00000124	.	+	256.64	-0.6873	0.004672	0.0249	7.533e-06
1	385907	386044	RLOC_00000124	.	+	287.22	-0.8410	0.000393	0.004681	7.533e-06
1	386131	386334	RLOC_00000124	.	+	412.49	-0.9105	0.0001099	0.001927	7.533e-06
1	386426	386841	RLOC_00000124	.	+	518.92	-1.1917	9.333e-05	0.001713	7.533e-06
1	387276	387505	RLOC_00000125	.	-	337.57	-0.2069	0.1825	0.3123	0.1514
1	387582	387673	RLOC_00000125	.	-	351.57	-0.1312	0.2112	0.346	0.1514
1	387673	387817	RLOC_00000125	.	-	5.78	1.3153	0.01204	0.0473	0.1514
1	387817	387952	RLOC_00000125	.	-	9.12	0.5205	0.3121	0.4553	0.1514
1	387952	388407	RLOC_00000125	.	-	436.07	-0.1038	0.1983	0.3311	0.1514
1	388538	388609	RLOC_00000125	.	-	283.62	-0.0107	0.5824	0.7034	0.1514
1	388849	388941	RLOC_00000125	.	-	237.92	0.0894	0.5179	0.6489	0.1514
1	389048	389138	RLOC_00000125	.	-	259.08	0.0245	0.87	0.9173	0.1514
1	389225	389301	RLOC_00000125	.	-	243.78	0.1636	0.2513	0.3904	0.1514
1	389409	389642	RLOC_00000125	.	-	294.04	0.2993	0.02028	0.0675	0.1514
1	389822	390251	RLOC_00000126	.	+	317.93	-0.0899	0.6104	0.7259	1.461e-05
1	390318	390401	RLOC_00000126	.	+	220.69	-0.1892	0.2482	0.3871	1.461e-05
1	390481	390564	RLOC_00000126	.	+	242.99	-0.2832	0.05428	0.1333	1.461e-05
1	390760	391123	RLOC_00000126	.	+	353.91	-0.3627	4.333e-06	0.0001638	1.461e-05
1	391456	391541	RLOC_00000126	.	+	235.25	-0.4185	0.003048	0.0187	1.461e-05
1	391650	391717	RLOC_00000126	.	+	228.06	-0.4641	0.006574	0.03138	1.461e-05
1	392019	392301	RLOC_00000126	.	+	276.48	-0.5452	1.41e-05	0.0004202	1.461e-05
1	392372	393875	RLOC_00000126	.	+	889.45	-0.3580	0.0002693	0.003606	1.461e-05
1	393965	394153	RLOC_00000126	.	+	120.97	-0.1461	0.3841	0.5266	1.461e-05
1	394227	394451	RLOC_00000126	.	+	178.06	-0.3244	0.04228	0.1121	1.461e-05
1	394451	394545	RLOC_00000126	.	+	5.83	0.2198	0.242	0.3804	1.461e-05
1	394633	395534	RLOC_00000126	.	+	555.45	-0.4048	4.542e-06	0.0001699	1.461e-05
1	395534	395598	RLOC_00000126	.	+	7.22	-0.0007	0.8047	0.8718	1.461e-05
1	395654	395946	RLOC_00000126	.	+	279.62	0.3667	0.00568	0.02846	1.461e-05
1	396027	396088	RLOC_00000126	.	+	228.00	0.4234	0.003716	0.02134	1.461e-05
1	396166	396218	RLOC_00000126	.	+	187.34	0.6170	4.366e-05	0.0009849	1.461e-05
1	396285	396356	RLOC_00000126	.	+	223.36	0.6229	1.049e-07	6.789e-06	1.461e-05
1	396436	396534	RLOC_00000126	.	+	300.23	0.4367	5.604e-05	0.00119	1.461e-05
1	396606	396725	RLOC_00000126	.	+	365.01	0.2982	0.006141	0.02998	1.461e-05
1	396725	396792	RLOC_00000126	.	+	8.20	1.1313	0.01227	0.04788	1.461e-05
1	396792	396864	RLOC_00000126	.	+	309.03	0.1890	0.09078	0.1908	1.461e-05
1	396940	397100	RLOC_00000126	.	+	341.73	0.2767	0.006783	0.03202	1.461e-05
1	397100	397249	RLOC_00000126	.	+	17.15	0.7918	0.02902	0.08636	1.461e-05
1	397249	397743	RLOC_00000126	.	+	241.86	0.2380	0.001765	0.01294	1.461e-05
1	397863	397964	RLOC_00000126	.	+	285.58	0.2939	0.0008282	0.007735	1.461e-05
1	398062	398153	RLOC_00000126	.	+	282.31	0.3220	0.001706	0.01265	1.461e-05
1	398291	398346	RLOC_00000126	.	+	239.78	0.4235	3.48e-05	0.0008328	1.461e-05
1	398346	398458	RLOC_00000126	.	+	11.56	0.3441	0.2852	0.4274	1.461e-05
1	398458	398527	RLOC_00000126	.	+	236.50	0.4106	2.04e-05	0.000562	1.461e-05
1	398611	399111	RLOC_00000126	.	+	547.31	0.0475	0.2819	0.4239	1.461e-05
1	399181	399941	RLOC_00000126	.	+	1386.71	-0.3191	0.009663	0.04069	1.461e-05
1	400022	400448	RLOC_00000127	.	-	878.94	-0.1884	0.02112	0.06944	0.1211
1	400724	400829	RLOC_00000127	.	-	595.26	-0.0552	0.8351	0.8933	0.1211
1	400929	401086	RLOC_00000127	.	-	688.24	0.0586	0.07278	0.1636	0.1211
1	401163	401235	RLOC_00000127	.	-	437.74	0.1507	0.00899	0.03875	0.1211
1	401594	401667	RLOC_00000127	.	-	285.02	0.0080	0.6996	0.7951	0.1211
1	401774	401863	RLOC_00000127	.	-	164.08	-0.0594	0.6243	0.737	0.1211
1	403160	403632	RLOC_00000130	.	-	1168.27	-0.0995	0.6838	0.7832	0.959
1	403721	404185	RLOC_00000130	.	-	1840.22	-0.0044	0.7047	0.7989	0.959
1	404185	404439	RLOC_00000130	.	-	1648.19	0.0574	0.401	0.5427	0.959
1	404612	404669	RLOC_00000131	.	+	41.05	0.9177	0.002607	0.01681	0.0002432
1	404755	404842	RLOC_00000131	.	+	77.27	0.6052	0.005725	0.02863	0.0002432
1	404842	404943	RLOC_00000131	.	+	78.44	0.6045	0.03607	0.1005	0.0002432
1	405229	405316	RLOC_00000131	.	+	77.59	0.6336	0.0004425	0.005072	0.0002432
1	405428	405765	RLOC_00000131	.	+	116.33	0.4139	0.001199	0.009954	0.0002432
1	405765	405891	RLOC_00000131	.	+	14.11	0.5666	0.1342	0.251	0.0002432
1	405891	405951	RLOC_00000131	.	+	108.38	-0.0215	0.7282	0.8164	0.0002432
1	406059	406132	RLOC_00000131	.	+	113.87	0.1920	0.1399	0.2584	0.0002432
1	406246	406310	RLOC_00000131	.	+	109.12	0.2703	0.03003	0.0885	0.0002432
1	406409	406518	RLOC_00000131	.	+	113.96	0.4513	0.002048	0.01431	0.0002432
1	406518	406792	RLOC_00000131	.	+	113.75	0.4781	0.001405	0.01109	0.0002432
1	406792	406902	RLOC_00000131	.	+	4.01	1.6051	0.01174	0.04649	0.0002432
1	406902	406989	RLOC_00000131	.	+	103.74	0.4676	0.01033	0.04255	0.0002432
1	407076	407147	RLOC_00000131	.	+	97.45	0.3542	0.0131	0.05002	0.0002432
1	407147	407320	RLOC_00000131	.	+	10.47	0.8153	0.03293	0.09438	0.0002432
1	407320	407389	RLOC_00000131	.	+	112.32	0.2503	0.107	0.2141	0.0002432
1	407467	407551	RLOC_00000131	.	+	126.62	0.0664	0.3489	0.4927	0.0002432
1	407721	407821	RLOC_00000131	.	+	188.59	-0.1490	0.9093	0.9435	0.0002432
1	408071	408138	RLOC_00000131	.	+	182.17	-0.2760	0.4124	0.5535	0.0002432
1	408235	408647	RLOC_00000131	.	+	261.59	-0.3937	0.1729	0.3006	0.0002432
1	408726	409140	RLOC_00000131	.	+	870.04	0.2259	0.04034	0.1085	0.0002432
1	409216	410693	RLOC_00000131	.	+	3596.03	-0.1893	0.09818	0.2015	0.0002432
1	410754	410893	RLOC_00000131	.	+	287.53	-0.0128	0.4475	0.5864	0.0002432
1	411176	411631	RLOC_00000131	.	+	554.36	-0.1958	0.5793	0.7008	0.0002432
1	411700	412258	RLOC_00000131	.	+	198.54	0.0814	0.4253	0.5658	0.0002432
1	412459	412790	RLOC_00000131	.	+	258.61	-0.3807	0.05796	0.1395	0.0002432
1	412881	413004	RLOC_00000131	.	+	233.17	-0.4969	0.003104	0.01894	0.0002432
1	413004	413079	RLOC_00000131	.	+	4.40	0.5038	0.4492	0.5879	0.0002432
1	413079	413296	RLOC_00000131	.	+	369.43	-0.6768	0.003758	0.02151	0.0002432
1	413296	413361	RLOC_00000131	.	+	5.46	-0.6582	0.7559	0.8369	0.0002432
1	413361	413578	RLOC_00000131	.	+	206.00	-0.9233	0.002718	0.01728	0.0002432
1	413751	414013	RLOC_00000131	.	+	5.95	2.8654	4.967e-05	0.001085	0.0002432
1	414208	414344	RLOC_00000131	.	+	3.09	4.0871	2.842e-06	0.0001158	0.0002432
1	413564	414205	RLOC_00000132	.	-	89.42	-0.2119	0.2551	0.3946	0.8704
1	414423	414633	RLOC_00000132	.	-	20.48	0.3241	0.2771	0.4187	0.8704
1	418790	418986	RLOC_00000134	.	+	131.69	0.7232	1.812e-05	0.0005129	0.001089
1	418986	419211	RLOC_00000134	.	+	336.17	0.5345	0.001173	0.009811	0.001089
1	419296	419529	RLOC_00000134	.	+	419.49	0.2887	0.0129	0.04946	0.001089
1	419529	419894	RLOC_00000134	.	+	428.84	0.3219	0.03416	0.09681	0.001089
1	419894	420170	RLOC_00000134	.	+	10.22	0.4843	0.213	0.3479	0.001089
1	420273	420440	RLOC_00000134	.	+	8.21	1.1692	0.01768	0.06141	0.001089
1	420494	420889	RLOC_00000134	.	+	742.93	0.0332	0.1272	0.2418	0.001089
1	420981	421092	RLOC_00000134	.	+	411.81	-0.1093	0.5645	0.6886	0.001089
1	421190	421394	RLOC_00000134	.	+	561.10	-0.0728	0.76	0.8399	0.001089
1	421523	421635	RLOC_00000134	.	+	437.95	-0.1435	0.3746	0.5175	0.001089
1	421731	421908	RLOC_00000134	.	+	674.18	-0.3229	0.01283	0.0493	0.001089
1	421908	422438	RLOC_00000134	.	+	933.62	-0.5562	0.006484	0.03108	0.001089
1	428799	429099	RLOC_00000137	.	-	36.82	-0.1542	0.9278	0.9559	0.476
1	429247	429370	RLOC_00000137	.	-	25.67	0.0331	0.6672	0.7705	0.476
1	429461	429776	RLOC_00000137	.	-	36.82	-0.3319	0.06378	0.149	0.476
1	429850	429997	RLOC_00000137	.	-	19.54	-0.1842	0.5352	0.6637	0.476
1	430068	430316	RLOC_00000137	.	-	28.47	0.4058	0.09656	0.1992	0.476
1	430413	430651	RLOC_00000137	.	-	25.45	0.4799	0.3519	0.4956	0.476
1	440498	441013	RLOC_00000141	.	-	151.80	-0.1877	0.2616	0.4018	0.02287
1	441135	441325	RLOC_00000141	.	-	103.02	-0.3149	0.001015	0.0089	0.02287
1	441397	442620	RLOC_00000141	.	-	264.28	0.2815	0.07219	0.1626	0.02287
1	442620	442941	RLOC_00000141	.	-	34.38	0.8452	0.00404	0.02256	0.02287
1	443194	443527	RLOC_00000142	.	-	298.12	-0.6499	0.006145	0.02999	0.04996
1	443628	443737	RLOC_00000142	.	-	164.57	-0.3194	0.05147	0.1284	0.04996
1	443794	443854	RLOC_00000142	.	-	3.06	-0.9422	0.659	0.764	0.04996
1	443936	444089	RLOC_00000142	.	-	144.18	-0.0644	0.963	0.9784	0.04996
1	444257	444383	RLOC_00000142	.	-	145.64	-0.0422	0.8962	0.935	0.04996
1	444488	444598	RLOC_00000142	.	-	121.16	-0.1070	0.6954	0.7919	0.04996
1	444664	444759	RLOC_00000142	.	-	91.49	0.0281	0.585	0.7054	0.04996
1	444843	445066	RLOC_00000142	.	-	160.22	0.1652	0.06426	0.1498	0.04996
1	445453	445560	RLOC_00000142	.	-	114.99	0.1235	0.2022	0.3359	0.04996
1	445647	445752	RLOC_00000142	.	-	118.61	0.1414	0.2603	0.4004	0.04996
1	445843	445943	RLOC_00000142	.	-	137.64	0.3076	0.01698	0.05976	0.04996
1	446029	446208	RLOC_00000142	.	-	121.99	0.4834	0.002813	0.01768	0.04996
1	448470	448733	RLOC_00000143	.	-	484.11	-0.6110	0.01385	0.05192	0.1681
1	448733	448811	RLOC_00000143	.	-	7.50	-0.2961	0.4762	0.6124	0.1681
1	448811	449125	RLOC_00000143	.	-	830.07	-0.2379	0.07445	0.1661	0.1681
1	449223	449505	RLOC_00000143	.	-	864.45	-0.0714	0.5015	0.6345	0.1681
1	449711	449838	RLOC_00000143	.	-	408.89	0.2042	0.02224	0.07198	0.1681
1	449937	450048	RLOC_00000143	.	-	486.65	0.1526	0.07867	0.1725	0.1681
1	450149	450259	RLOC_00000143	.	-	427.33	0.1910	0.04687	0.1205	0.1681
1	450359	452066	RLOC_00000143	.	-	625.67	0.1236	0.1271	0.2417	0.1681
1	452582	452725	RLOC_00000143	.	-	28.17	0.6256	0.02113	0.06945	0.1681
1	453217	453365	RLOC_00000144	.	+	60.39	0.4028	0.04968	0.1254	0.01235
1	453593	453647	RLOC_00000144	.	+	81.27	0.3841	0.006847	0.03223	0.01235
1	453729	453810	RLOC_00000144	.	+	87.50	0.3044	0.00541	0.02752	0.01235
1	453906	454336	RLOC_00000144	.	+	222.62	0.2143	0.01735	0.06063	0.01235
1	454414	454540	RLOC_00000144	.	+	199.88	0.0491	0.1876	0.3185	0.01235
1	454621	454841	RLOC_00000144	.	+	314.03	0.0317	0.2662	0.407	0.01235
1	454925	455148	RLOC_00000144	.	+	318.67	-0.2205	0.0369	0.1021	0.01235
1	455241	455513	RLOC_00000144	.	+	333.37	-0.5685	0.0004528	0.005152	0.01235
1	455694	455903	RLOC_00000145	.	+	438.15	0.4133	2.902e-07	1.665e-05	3.556e-05
1	456175	456231	RLOC_00000145	.	+	490.23	0.4409	4.504e-06	0.0001689	3.556e-05
1	456312	456395	RLOC_00000145	.	+	473.48	0.2170	0.01047	0.04295	3.556e-05
1	456489	456649	RLOC_00000145	.	+	626.58	0.1556	0.01246	0.04838	3.556e-05
1	456840	456917	RLOC_00000145	.	+	463.17	0.0742	0.1053	0.2117	3.556e-05
1	457008	457135	RLOC_00000145	.	+	824.13	-0.0689	0.8404	0.8968	3.556e-05
1	457208	457430	RLOC_00000145	.	+	1285.35	-0.1833	0.09951	0.2034	3.556e-05
1	457511	457752	RLOC_00000145	.	+	1130.98	-0.2488	0.001835	0.01328	3.556e-05
1	457839	458153	RLOC_00000145	.	+	1184.78	-0.4680	0.01056	0.04321	3.556e-05
1	458270	458626	RLOC_00000147	.	-	19.35	-0.1304	0.288	0.4302	0.8979
1	458749	458940	RLOC_00000147	.	-	9.02	0.1277	0.4799	0.6157	0.8979
1	460511	460573	RLOC_00000147	.	-	4.74	0.2592	0.6397	0.7491	0.8979
1	462050	462385	RLOC_00000150	.	-	261.18	0.2433	0.002456	0.01615	7.098e-06
1	462474	462632	RLOC_00000150	.	-	285.90	0.4842	2.134e-06	9.166e-05	7.098e-06
1	462726	462800	RLOC_00000150	.	-	195.45	0.6163	4.687e-08	3.301e-06	7.098e-06
1	462800	462875	RLOC_00000150	.	-	2.42	2.2876	0.001054	0.009139	7.098e-06
1	462875	462999	RLOC_00000150	.	-	263.65	0.4777	2.62e-05	0.0006771	7.098e-06
1	463121	463325	RLOC_00000150	.	-	303.93	0.4566	0.0003963	0.004706	7.098e-06
1	463420	463592	RLOC_00000150	.	-	160.59	0.4521	0.0005839	0.006089	7.098e-06
1	463860	464524	RLOC_00000150	.	-	294.69	-0.1327	0.5678	0.6914	7.098e-06
1	464761	464908	RLOC_00000150	.	-	71.25	0.1456	0.2291	0.3662	7.098e-06
1	465666	466799	RLOC_00000150	.	-	2580.17	-0.6471	3.486e-05	0.0008332	7.098e-06
1	466799	466957	RLOC_00000150	.	-	23.29	-0.9143	0.0197	0.06613	7.098e-06
1	466957	467097	RLOC_00000150	.	-	931.63	-0.3286	0.06583	0.1524	7.098e-06
1	467097	467184	RLOC_00000150	.	-	8.13	0.4328	0.2258	0.3624	7.098e-06
1	467184	467588	RLOC_00000150	.	-	1437.25	-0.1169	0.6121	0.7273	7.098e-06
1	467648	467780	RLOC_00000150	.	-	589.73	-0.1969	0.877	0.9218	7.098e-06
1	469818	470482	RLOC_00000151	.	+	189.38	-0.0561	0.5338	0.6626	2.696e-05
1	470572	470849	RLOC_00000151	.	+	147.57	-0.5888	0.03536	0.09919	2.696e-05
1	470973	471077	RLOC_00000151	.	+	2.87	3.7448	2.112e-07	1.259e-05	2.696e-05
1	471146	471215	RLOC_00000151	.	+	4.84	2.1750	0.0001603	0.002507	2.696e-05
1	471294	471355	RLOC_00000151	.	+	4.41	1.3019	0.01355	0.05117	2.696e-05
1	472044	472507	RLOC_00000153	.	-	78.55	-0.1390	0.4373	0.5771	0.971
1	472667	473122	RLOC_00000153	.	-	57.46	0.1564	0.447	0.586	0.971
1	474509	474887	RLOC_00000154	.	+	36.42	0.2061	0.277	0.4185	0.8728
1	475141	476518	RLOC_00000154	.	+	195.84	-0.1015	0.2575	0.3973	0.8728
1	477071	477139	RLOC_00000155	.	+	7.56	0.3742	0.4128	0.5539	0.5777
1	477139	477205	RLOC_00000155	.	+	38.00	0.3157	0.3573	0.5009	0.5777
1	477715	478304	RLOC_00000155	.	+	236.27	0.0736	0.6099	0.7255	0.5777
1	478524	478669	RLOC_00000155	.	+	110.05	-0.0112	0.6482	0.7557	0.5777
1	478669	478720	RLOC_00000155	.	+	3.56	-1.3151	0.106	0.2127	0.5777
1	478789	479078	RLOC_00000155	.	+	78.38	-0.2548	0.09046	0.1903	0.5777
1	480865	481620	RLOC_00000156	.	+	193.17	0.3631	0.003869	0.02195	0.05678
1	482268	483344	RLOC_00000156	.	+	384.77	-0.3238	0.003318	0.01981	0.05678
1	486985	487364	RLOC_00000157	.	+	33.52	-0.1188	0.7929	0.8636	0.4399
1	488719	489062	RLOC_00000157	.	+	39.28	0.1894	0.05593	0.1361	0.4399
1	489145	489412	RLOC_00000157	.	+	31.52	-0.3000	0.3326	0.4762	0.4399
1	490931	491006	RLOC_00000159	.	+	44.17	0.0611	0.6315	0.7427	0.5425
1	491132	491233	RLOC_00000159	.	+	5.73	0.5564	0.1364	0.2539	0.5425
1	491233	491379	RLOC_00000159	.	+	123.79	0.2026	0.0804	0.1752	0.5425
1	491486	491803	RLOC_00000159	.	+	319.82	0.1525	0.1182	0.2295	0.5425
1	491904	491960	RLOC_00000159	.	+	189.56	-0.0601	0.7897	0.8612	0.5425
1	492084	492158	RLOC_00000159	.	+	208.18	-0.0132	0.8409	0.8972	0.5425
1	492237	492352	RLOC_00000159	.	+	226.76	0.0196	0.6481	0.7556	0.5425
1	492442	492524	RLOC_00000159	.	+	188.94	-0.0748	0.7133	0.8051	0.5425
1	492606	492932	RLOC_00000159	.	+	259.10	-0.4747	0.09707	0.2	0.5425
1	493605	494359	RLOC_00000160	.	+	39.64	-0.0411	0.8561	0.9077	5.634e-09
1	494359	495593	RLOC_00000160	.	+	138.24	-0.6202	2.173e-11	2.6e-09	5.634e-09
1	495593	496212	RLOC_00000160	.	+	28.62	1.4883	4.994e-06	0.0001831	5.634e-09
1	496344	496869	RLOC_00000160	.	+	11.66	4.2024	1.974e-09	1.841e-07	5.634e-09
1	497401	497467	RLOC_00000160	.	+	1.92	13.5696	2.686e-05	0.0006893	5.634e-09
1	511776	511863	RLOC_00000165	.	-	12.56	4.8216	1.858e-26	6.932e-24	0
1	511863	512430	RLOC_00000165	.	-	80.85	3.6055	5.526e-45	4.631e-42	0
1	512524	512620	RLOC_00000165	.	-	42.24	3.6761	7.81e-25	2.638e-22	0
1	512943	513085	RLOC_00000165	.	-	3.20	2.8765	0.0001139	0.001973	0
1	513146	513854	RLOC_00000165	.	-	98.49	3.6400	3.564e-57	4.35e-54	0
1	513854	514034	RLOC_00000165	.	-	285.55	-0.6340	0.007087	0.03301	0
1	514034	514104	RLOC_00000165	.	-	18.06	0.8261	0.01682	0.05935	0
1	514104	514185	RLOC_00000165	.	-	490.68	-0.5978	2.866e-09	2.596e-07	0
1	514268	514320	RLOC_00000165	.	-	540.55	-0.4862	1.082e-08	8.695e-07	0
1	514417	514470	RLOC_00000165	.	-	580.12	-0.3255	7.967e-06	0.0002682	0
1	514552	514801	RLOC_00000165	.	-	760.09	-0.1455	0.003258	0.01956	0
1	514890	514991	RLOC_00000165	.	-	469.11	0.1444	0.2881	0.4303	0
1	515092	515389	RLOC_00000165	.	-	547.36	0.2998	0.05741	0.1386	0
1	518257	518378	RLOC_00000168	.	+	1580.89	0.2031	0.0002542	0.003473	0.007545
1	519030	520436	RLOC_00000168	.	+	13946.88	-0.1878	0.000235	0.003281	0.007545
1	524344	524415	RLOC_00000170	.	+	3.61	0.3414	0.2975	0.4402	0.01844
1	524520	524575	RLOC_00000170	.	+	4.01	0.3675	0.2867	0.4289	0.01844
1	524661	524837	RLOC_00000170	.	+	6.18	0.8014	0.04756	0.1217	0.01844
1	524916	525086	RLOC_00000170	.	+	7.89	1.0777	0.01676	0.05921	0.01844
1	525565	526055	RLOC_00000170	.	+	16.77	0.8683	0.0007653	0.007331	0.01844
1	526055	526117	RLOC_00000170	.	+	7.42	-0.4328	0.3939	0.536	0.01844
1	526117	526194	RLOC_00000170	.	+	5.04	-0.6493	0.9781	0.9875	0.01844
1	526559	526817	RLOC_00000170	.	+	12.19	-0.1407	0.9494	0.9697	0.01844
1	526817	527078	RLOC_00000170	.	+	10.33	0.1050	0.5512	0.6773	0.01844
1	527388	527577	RLOC_00000170	.	+	12.27	-0.2338	0.641	0.7501	0.01844
1	527657	527921	RLOC_00000170	.	+	21.19	0.0372	0.6276	0.7397	0.01844
1	528009	528309	RLOC_00000170	.	+	26.45	-0.2389	0.4928	0.6271	0.01844
1	528391	528735	RLOC_00000170	.	+	25.25	-0.8676	0.001484	0.0115	0.01844
1	537835	538131	RLOC_00000174	.	+	2037.80	0.2672	0.001594	0.01206	0.01513
1	538206	538345	RLOC_00000174	.	+	2204.61	0.1527	0.005078	0.02639	0.01513
1	538406	538533	RLOC_00000174	.	+	2180.53	0.1232	0.003914	0.02211	0.01513
1	538626	538720	RLOC_00000174	.	+	1757.18	-0.0096	0.3344	0.478	0.01513
1	538934	539008	RLOC_00000174	.	+	1928.68	-0.0973	0.6883	0.7866	0.01513
1	539388	539480	RLOC_00000174	.	+	2273.13	-0.0720	0.9935	0.9968	0.01513
1	539604	540083	RLOC_00000174	.	+	4201.62	-0.5027	0.000591	0.006138	0.01513
1	553028	554615	RLOC_00000181	.	-	830.90	-0.1611	0.1309	0.2468	0.1345
1	554795	554897	RLOC_00000181	.	-	281.49	-0.1135	0.4465	0.5856	0.1345
1	554946	555129	RLOC_00000181	.	-	16.13	0.4354	0.2117	0.3465	0.1345
1	555129	555339	RLOC_00000181	.	-	13.01	0.8748	0.01658	0.05874	0.1345
1	555570	555645	RLOC_00000181	.	-	365.72	-0.0225	0.9884	0.9937	0.1345
1	555725	556004	RLOC_00000181	.	-	395.93	0.1715	0.01032	0.04254	0.1345
1	557022	557083	RLOC_00000182	.	-	7.04	-0.6247	0.1728	0.3005	0.7695
1	557163	557652	RLOC_00000182	.	-	26.05	0.0117	0.9256	0.9544	0.7695
1	557712	557991	RLOC_00000182	.	-	18.62	-0.1318	0.6381	0.7478	0.7695
1	558058	558120	RLOC_00000182	.	-	7.57	0.3200	0.52	0.6508	0.7695
1	558209	558540	RLOC_00000182	.	-	19.71	0.2195	0.3482	0.492	0.7695
1	557324	557803	RLOC_00000183	.	+	25.03	0.5503	0.01284	0.04933	0.1587
1	557803	557865	RLOC_00000183	.	+	10.65	-0.5607	0.08701	0.1852	0.1587
1	557865	558175	RLOC_00000183	.	+	22.09	-0.1099	0.4316	0.5717	0.1587
1	558257	558899	RLOC_00000183	.	+	49.36	-0.1456	0.7217	0.8116	0.1587
1	561118	561259	RLOC_00000185	.	-	6.14	-0.6637	0.2612	0.4014	0.5223
1	562244	562340	RLOC_00000185	.	-	5.00	-0.1896	0.79	0.8615	0.5223
1	562340	562392	RLOC_00000185	.	-	3.28	0.6777	0.0751	0.1671	0.5223
1	564215	564697	RLOC_00000186	.	+	294.01	0.4619	0.0001808	0.002734	0.006216
1	564778	564853	RLOC_00000186	.	+	4.65	0.0550	0.8994	0.9371	0.006216
1	565432	565711	RLOC_00000186	.	+	255.84	0.2887	0.001955	0.01386	0.006216
1	565781	565954	RLOC_00000186	.	+	183.44	-0.0119	0.6873	0.7858	0.006216
1	566041	566140	RLOC_00000186	.	+	155.74	-0.1781	0.4208	0.5616	0.006216
1	566225	567742	RLOC_00000186	.	+	1232.08	-0.3306	0.0009387	0.008433	0.006216
1	568619	568739	RLOC_00000187	.	+	5.37	0.4479	0.1893	0.3205	0.5193
1	568831	568932	RLOC_00000187	.	+	8.48	0.2768	0.2293	0.3664	0.5193
1	569304	570406	RLOC_00000187	.	+	68.12	-0.2961	0.07432	0.1659	0.5193
1	571939	572759	RLOC_00000188	.	-	997.22	-0.5207	0.0009044	0.008226	0.02095
1	572759	572835	RLOC_00000188	.	-	8.73	-0.2289	0.622	0.7352	0.02095
1	572835	573252	RLOC_00000188	.	-	543.98	-0.0766	0.4488	0.5876	0.02095
1	573337	573397	RLOC_00000188	.	-	184.85	0.1844	0.08061	0.1755	0.02095
1	573488	573961	RLOC_00000188	.	-	534.59	0.1565	0.006108	0.02988	0.02095
1	574119	574955	RLOC_00000188	.	-	679.47	0.2345	0.02538	0.07871	0.02095
1	577050	577536	RLOC_00000189	.	+	16.77	-0.0718	0.6631	0.7673	0.71
1	577809	577906	RLOC_00000189	.	+	8.13	-0.4667	0.3897	0.5321	0.71
1	577978	578052	RLOC_00000189	.	+	7.14	-0.6276	0.1411	0.2601	0.71
1	578343	578422	RLOC_00000189	.	+	6.40	0.3050	0.6064	0.7227	0.71
1	578894	579017	RLOC_00000189	.	+	11.45	0.3928	0.4848	0.6201	0.71
1	579195	579312	RLOC_00000189	.	+	15.78	-0.1391	0.5253	0.6553	0.71
1	579420	579525	RLOC_00000189	.	+	12.71	0.2493	0.5005	0.6338	0.71
1	579646	579799	RLOC_00000189	.	+	19.78	0.1695	0.3836	0.5262	0.71
1	580226	580361	RLOC_00000189	.	+	8.67	0.0912	0.8417	0.8978	0.71
1	580659	580745	RLOC_00000190	.	+	62.01	0.0769	0.6476	0.7552	2.173e-06
1	581068	581186	RLOC_00000190	.	+	128.14	0.1381	0.157	0.2807	2.173e-06
1	581290	581496	RLOC_00000190	.	+	108.96	0.1239	0.3185	0.4619	2.173e-06
1	581496	581718	RLOC_00000190	.	+	190.94	-0.1386	0.1336	0.2503	2.173e-06
1	581814	582258	RLOC_00000190	.	+	278.40	-0.1199	0.4267	0.5671	2.173e-06
1	582395	582510	RLOC_00000190	.	+	3.04	14.6255	1.253e-08	9.973e-07	2.173e-06
1	584280	584618	RLOC_00000192	.	+	52.30	0.5750	0.0128	0.04923	0.06309
1	584859	584956	RLOC_00000192	.	+	40.13	0.5396	0.00381	0.02171	0.06309
1	585052	585144	RLOC_00000192	.	+	37.08	0.6524	0.005865	0.02909	0.06309
1	585236	585368	RLOC_00000192	.	+	42.23	0.6095	0.008295	0.03672	0.06309
1	585499	585685	RLOC_00000192	.	+	50.99	0.3101	0.1863	0.3169	0.06309
1	585778	585942	RLOC_00000192	.	+	59.98	-0.2778	0.1562	0.2796	0.06309
1	586022	586101	RLOC_00000192	.	+	43.51	-0.4749	0.1396	0.2581	0.06309
1	586191	586320	RLOC_00000192	.	+	61.36	-0.4169	0.1063	0.213	0.06309
1	586438	586566	RLOC_00000192	.	+	59.18	-0.2049	0.2079	0.3422	0.06309
1	586619	587133	RLOC_00000192	.	+	140.83	-0.3435	0.006814	0.03213	0.06309
1	588361	588530	RLOC_00000193	.	+	14.39	0.3798	0.4544	0.5927	0.6409
1	588795	588877	RLOC_00000193	.	+	15.11	0.4214	0.7184	0.809	0.6409
1	588921	589178	RLOC_00000193	.	+	16.78	0.8067	0.2332	0.3707	0.6409
1	589572	589977	RLOC_00000193	.	+	47.76	-0.4155	0.1597	0.2841	0.6409
1	589977	590093	RLOC_00000193	.	+	20.28	-0.1624	0.5957	0.7141	0.6409
1	590093	590148	RLOC_00000193	.	+	8.38	-1.5223	0.1123	0.2215	0.6409
1	591939	593229	RLOC_00000195	.	+	253.44	0.3590	0.003128	0.01905	0.05435
1	593865	594178	RLOC_00000195	.	+	89.96	-0.4562	0.004343	0.02365	0.05435
1	594615	596478	RLOC_00000196	.	-	347.47	-0.4506	0.003632	0.02102	0.06082
1	596571	597382	RLOC_00000196	.	-	147.76	0.0678	0.02216	0.07182	0.06082
1	597520	598340	RLOC_00000196	.	-	138.65	0.1096	0.02255	0.07265	0.06082
1	598340	598591	RLOC_00000196	.	-	30.19	0.4352	0.01183	0.04674	0.06082
1	599369	599814	RLOC_00000197	.	-	108.18	-0.7250	0.002236	0.01518	0.01685
1	599814	599891	RLOC_00000197	.	-	5.61	1.2377	0.01398	0.05223	0.01685
1	599891	599977	RLOC_00000197	.	-	92.25	-0.3705	0.05171	0.1289	0.01685
1	600064	600234	RLOC_00000197	.	-	103.76	-0.2115	0.3325	0.4761	0.01685
1	600433	600513	RLOC_00000197	.	-	70.00	0.0249	0.725	0.814	0.01685
1	600720	600826	RLOC_00000197	.	-	92.17	0.0077	0.6776	0.7785	0.01685
1	600914	600976	RLOC_00000197	.	-	73.20	0.0264	0.6312	0.7425	0.01685
1	601226	601372	RLOC_00000197	.	-	99.52	0.1973	0.09574	0.198	0.01685
1	601652	601706	RLOC_00000197	.	-	37.59	0.4989	0.005824	0.02897	0.01685
1	601811	602147	RLOC_00000197	.	-	69.24	0.4116	0.0006805	0.006763	0.01685
1	602516	602755	RLOC_00000198	.	+	108.45	0.2472	0.01808	0.06233	0.2045
1	602979	603125	RLOC_00000198	.	+	130.72	0.0615	0.2023	0.3359	0.2045
1	603600	603679	RLOC_00000198	.	+	101.18	-0.1185	0.9364	0.9614	0.2045
1	603767	604312	RLOC_00000198	.	+	246.74	-0.3298	0.08097	0.1761	0.2045
1	604968	605403	RLOC_00000200	.	-	30.14	0.2084	0.2963	0.4389	0.4131
1	605514	605604	RLOC_00000200	.	-	14.90	0.5585	0.08844	0.1874	0.4131
1	605704	605805	RLOC_00000200	.	-	16.39	0.0701	0.6413	0.7502	0.4131
1	605918	606102	RLOC_00000200	.	-	16.55	-0.0762	0.6492	0.7565	0.4131
1	606175	606322	RLOC_00000200	.	-	23.01	-0.4640	0.05064	0.127	0.4131
1	606528	606675	RLOC_00000200	.	-	18.21	-0.0921	0.7431	0.8276	0.4131
1	607829	608188	RLOC_00000201	.	-	5865.14	-0.2064	0.101	0.2055	0.05536
1	608240	608311	RLOC_00000201	.	-	6823.36	-0.1960	0.0162	0.05785	0.05536
1	608396	608712	RLOC_00000201	.	-	12344.26	0.0220	0.4874	0.6223	0.05536
1	608812	609427	RLOC_00000201	.	-	8643.01	0.3654	0.003211	0.01938	0.05536
1	613291	613706	RLOC_00000203	.	-	31.96	-0.2748	0.1114	0.2202	0.03105
1	613993	614044	RLOC_00000203	.	-	12.48	-0.6103	0.02944	0.08723	0.03105
1	614988	615179	RLOC_00000203	.	-	14.24	-0.1372	0.5899	0.7093	0.03105
1	615297	615474	RLOC_00000203	.	-	9.55	1.2389	0.00152	0.01168	0.03105
1	615915	616054	RLOC_00000203	.	-	11.51	0.8229	0.114	0.2238	0.03105
1	618285	619042	RLOC_00000204	.	+	66.04	0.3076	0.02126	0.06972	0.2301
1	619042	619328	RLOC_00000204	.	+	34.46	-0.0852	0.766	0.8443	0.2301
1	619638	620428	RLOC_00000204	.	+	74.62	-0.2835	0.08147	0.1769	0.2301
1	623754	624140	RLOC_00000207	.	-	1718.14	-0.1245	0.07168	0.1618	0.5087
1	624230	624556	RLOC_00000207	.	-	1299.52	0.1283	0.07221	0.1626	0.5087
1	626761	626828	RLOC_00000209	.	+	374.25	0.2449	0.009483	0.0402	0.009484
1	626910	627004	RLOC_00000209	.	+	691.41	0.2658	0.0003192	0.00406	0.009484
1	627099	627165	RLOC_00000209	.	+	769.47	0.2482	0.001582	0.01202	0.009484
1	627301	627384	RLOC_00000209	.	+	602.15	0.2366	0.01944	0.06554	0.009484
1	627475	627614	RLOC_00000209	.	+	1316.58	0.1459	0.006377	0.03074	0.009484
1	627832	627893	RLOC_00000209	.	+	997.27	0.0165	0.3221	0.4657	0.009484
1	627968	628019	RLOC_00000209	.	+	835.87	-0.0153	0.6686	0.7716	0.009484
1	628110	628173	RLOC_00000209	.	+	725.01	-0.1276	0.2413	0.3796	0.009484
1	628244	628710	RLOC_00000209	.	+	1257.18	-0.1196	0.1745	0.3026	0.009484
1	628764	629323	RLOC_00000209	.	+	1081.98	-0.1615	0.187	0.3178	0.009484
1	629417	629497	RLOC_00000209	.	+	811.35	-0.4510	0.001936	0.01377	0.009484
1	629578	629844	RLOC_00000209	.	+	808.14	-0.7365	0.01139	0.04553	0.009484
1	630511	630704	RLOC_00000210	.	+	165.98	0.4484	0.0007954	0.007524	3.474e-05
1	630784	630896	RLOC_00000210	.	+	185.74	0.3292	0.002272	0.01533	3.474e-05
1	630976	631034	RLOC_00000210	.	+	201.24	0.3016	0.001619	0.0122	3.474e-05
1	631102	631180	RLOC_00000210	.	+	222.32	0.3977	2.818e-07	1.623e-05	3.474e-05
1	631264	631336	RLOC_00000210	.	+	222.53	0.3650	7.328e-05	0.001442	3.474e-05
1	631430	631519	RLOC_00000210	.	+	223.52	0.1750	0.01825	0.06277	3.474e-05
1	631595	632043	RLOC_00000210	.	+	508.50	-0.0420	0.4831	0.6186	3.474e-05
1	632126	632348	RLOC_00000210	.	+	535.75	-0.1771	0.3325	0.4761	3.474e-05
1	632527	632806	RLOC_00000210	.	+	523.75	-0.4173	0.001076	0.009263	3.474e-05
1	632806	632880	RLOC_00000210	.	+	8.38	0.2095	0.3549	0.4986	3.474e-05
1	632880	633252	RLOC_00000210	.	+	549.35	-0.8107	6.85e-06	0.0002374	3.474e-05
1	635161	635663	RLOC_00000211	.	+	223.09	0.2609	0.0412	0.1101	0.3629
1	635736	635986	RLOC_00000211	.	+	265.23	0.1377	0.2088	0.3432	0.3629
1	636080	636730	RLOC_00000211	.	+	508.33	-0.0810	0.6308	0.7422	0.3629
1	636730	636826	RLOC_00000211	.	+	6.64	0.2489	0.4866	0.6215	0.3629
1	636826	637268	RLOC_00000211	.	+	299.68	-0.4014	0.09038	0.1903	0.3629
1	637313	637514	RLOC_00000213	.	-	172.97	-0.0894	0.3902	0.5326	0.8048
1	637600	637724	RLOC_00000213	.	-	206.18	-0.0286	0.3625	0.5058	0.8048
1	638257	638630	RLOC_00000213	.	-	262.90	0.1390	0.1969	0.3295	0.8048
1	641568	641844	RLOC_00000216	.	+	14.92	-0.3906	0.01272	0.04906	0.1576
1	641994	642187	RLOC_00000216	.	+	5.64	0.7986	0.0276	0.08342	0.1576
1	642885	643208	RLOC_00000217	.	-	143.78	-0.2702	0.06516	0.1513	0.4548
1	643303	643554	RLOC_00000217	.	-	126.32	-0.1036	0.6349	0.7453	0.4548
1	643643	643745	RLOC_00000217	.	-	70.48	-0.0786	0.777	0.8522	0.4548
1	643875	643949	RLOC_00000217	.	-	75.80	0.1447	0.1131	0.2225	0.4548
1	643949	644016	RLOC_00000217	.	-	6.37	-0.0246	0.8353	0.8934	0.4548
1	644141	644261	RLOC_00000217	.	-	81.90	0.0670	0.3768	0.5196	0.4548
1	644349	644539	RLOC_00000217	.	-	69.84	0.2654	0.05902	0.1412	0.4548
1	645107	645487	RLOC_00000218	.	-	336.63	-0.8491	0.0001209	0.002058	0.002064
1	645572	645681	RLOC_00000218	.	-	398.59	-0.6637	0.0001099	0.001928	0.002064
1	645754	645816	RLOC_00000218	.	-	306.09	-0.4655	0.007746	0.03502	0.002064
1	645898	646039	RLOC_00000218	.	-	414.23	-0.5124	0.005745	0.0287	0.002064
1	646125	646312	RLOC_00000218	.	-	508.35	-0.5169	0.0003313	0.004172	0.002064
1	646405	646491	RLOC_00000218	.	-	336.40	-0.4656	0.003019	0.01857	0.002064
1	646566	646689	RLOC_00000218	.	-	328.71	-0.1928	0.2561	0.3958	0.002064
1	646776	646956	RLOC_00000218	.	-	324.75	0.0096	0.4253	0.5658	0.002064
1	647037	647108	RLOC_00000218	.	-	224.45	0.1564	0.08985	0.1894	0.002064
1	647183	647280	RLOC_00000218	.	-	212.16	0.0628	0.2297	0.3669	0.002064
1	647366	647443	RLOC_00000218	.	-	229.76	-0.0037	0.3914	0.5336	0.002064
1	647528	647621	RLOC_00000218	.	-	246.03	-0.0491	0.5885	0.7081	0.002064
1	647702	647807	RLOC_00000218	.	-	236.42	-0.0187	0.4719	0.6086	0.002064
1	647922	647995	RLOC_00000218	.	-	181.19	0.0180	0.2978	0.4405	0.002064
1	648101	648276	RLOC_00000218	.	-	246.58	0.0616	0.1255	0.2395	0.002064
1	648360	648432	RLOC_00000218	.	-	145.39	0.0789	0.1251	0.2389	0.002064
1	648507	648656	RLOC_00000218	.	-	164.60	0.2197	0.003428	0.02024	0.002064
1	648764	648829	RLOC_00000218	.	-	118.57	0.3654	0.001001	0.008821	0.002064
1	648910	649139	RLOC_00000218	.	-	257.67	0.3685	0.0005267	0.005689	0.002064
1	649367	649459	RLOC_00000218	.	-	165.13	0.3531	0.003972	0.02229	0.002064
1	649550	649675	RLOC_00000218	.	-	173.83	0.4302	0.01326	0.05043	0.002064
1	649761	650438	RLOC_00000218	.	-	461.40	0.4461	0.0002101	0.003038	0.002064
1	650562	650709	RLOC_00000218	.	-	149.60	0.3795	0.008717	0.03796	0.002064
1	650790	650904	RLOC_00000218	.	-	112.84	0.3759	0.007181	0.0333	0.002064
1	651127	651219	RLOC_00000218	.	-	118.44	0.3324	0.01526	0.05547	0.002064
1	651318	651540	RLOC_00000218	.	-	205.60	0.4895	0.001217	0.01005	0.002064
1	651710	651909	RLOC_00000218	.	-	124.64	0.6528	4.199e-05	0.0009576	0.002064
1	655572	655823	RLOC_00000220	.	-	462.75	-0.5734	0.009985	0.04159	0.002597
1	655931	656133	RLOC_00000220	.	-	477.61	-0.5101	5.684e-05	0.001202	0.002597
1	656133	656505	RLOC_00000220	.	-	813.55	-0.0892	0.09598	0.1983	0.002597
1	656586	657060	RLOC_00000220	.	-	942.50	0.2110	0.00166	0.01241	0.002597
1	657140	657281	RLOC_00000220	.	-	369.92	0.3634	0.02867	0.08562	0.002597
1	657388	657496	RLOC_00000220	.	-	235.98	0.4463	0.01881	0.06412	0.002597
1	657854	658162	RLOC_00000220	.	-	431.41	0.2338	0.06405	0.1495	0.002597
1	658712	659316	RLOC_00000221	.	-	282.42	-0.2670	0.09135	0.1916	0.5806
1	659555	659762	RLOC_00000221	.	-	104.21	0.3142	0.1022	0.2072	0.5806
1	661190	661790	RLOC_00000222	.	-	328.54	-0.2582	0.03339	0.09529	0.2813
1	662041	662250	RLOC_00000222	.	-	143.56	0.1423	0.08525	0.1826	0.2813
1	662250	662340	RLOC_00000222	.	-	13.16	0.6206	0.02825	0.08479	0.2813
1	665158	665248	RLOC_00000224	.	-	12.69	0.3348	0.3896	0.5321	0.9551
1	665248	665777	RLOC_00000224	.	-	129.04	-0.0632	0.6826	0.7823	0.9551
1	666113	666256	RLOC_00000224	.	-	44.09	0.0079	0.8347	0.893	0.9551
1	666904	667068	RLOC_00000226	.	-	86.57	-0.5150	0.002373	0.01579	0.03945
1	667150	667642	RLOC_00000226	.	-	305.06	-0.3775	0.002071	0.01442	0.03945
1	667734	667868	RLOC_00000226	.	-	138.56	-0.0254	0.9683	0.9815	0.03945
1	667956	668082	RLOC_00000226	.	-	120.37	-0.0442	0.9486	0.9691	0.03945
1	668171	668469	RLOC_00000226	.	-	168.14	-0.0204	0.8936	0.9332	0.03945
1	668612	668745	RLOC_00000226	.	-	85.79	0.4563	0.01236	0.04811	0.03945
1	668855	668987	RLOC_00000226	.	-	93.36	0.4023	0.03426	0.09701	0.03945
1	669078	669134	RLOC_00000226	.	-	79.23	0.4137	0.04748	0.1215	0.03945
1	669460	669513	RLOC_00000226	.	-	71.49	0.4406	0.02534	0.07863	0.03945
1	669619	669808	RLOC_00000226	.	-	58.17	0.3105	0.138	0.256	0.03945
1	673444	673706	RLOC_00000228	.	+	12.23	0.5256	0.1132	0.2227	0.2027
1	674098	674165	RLOC_00000228	.	+	8.85	0.1391	0.4615	0.5993	0.2027
1	674440	674544	RLOC_00000228	.	+	10.62	0.6808	0.07288	0.1637	0.2027
1	674544	674704	RLOC_00000228	.	+	13.14	0.5796	0.3109	0.4541	0.2027
1	675010	675077	RLOC_00000228	.	+	5.67	0.9464	0.09403	0.1955	0.2027
1	675340	675450	RLOC_00000228	.	+	11.72	0.1057	0.9481	0.9689	0.2027
1	675629	675945	RLOC_00000228	.	+	26.99	-0.6015	0.01786	0.06181	0.2027
1	676043	676189	RLOC_00000228	.	+	12.30	-0.6163	0.09551	0.1976	0.2027
1	676208	676318	RLOC_00000228	.	+	3.60	-1.3419	0.03184	0.09218	0.2027
1	681390	681990	RLOC_00000230	.	-	224.79	-0.7264	0.001909	0.01364	0.0117
1	682054	682127	RLOC_00000230	.	-	5.33	-0.2498	0.6748	0.7763	0.0117
1	682242	682403	RLOC_00000230	.	-	132.61	-0.6169	0.0004215	0.004907	0.0117
1	682731	682892	RLOC_00000230	.	-	107.36	-0.4431	0.002109	0.01459	0.0117
1	683174	683317	RLOC_00000230	.	-	80.83	-0.3260	0.05683	0.1376	0.0117
1	683401	684777	RLOC_00000230	.	-	386.57	0.0954	0.2444	0.3829	0.0117
1	684863	685607	RLOC_00000230	.	-	184.92	0.1853	0.04527	0.1176	0.0117
1	685607	685965	RLOC_00000230	.	-	93.10	0.7645	0.007938	0.03561	0.0117
1	686055	686424	RLOC_00000230	.	-	85.11	0.8976	0.001031	0.008994	0.0117
1	686504	686605	RLOC_00000230	.	-	40.38	0.8720	0.005423	0.02756	0.0117
1	686678	686751	RLOC_00000230	.	-	34.53	0.6766	0.00415	0.02296	0.0117
1	686843	687321	RLOC_00000230	.	-	53.64	0.8149	0.00142	0.01116	0.0117
1	687829	687884	RLOC_00000231	.	-	11.10	0.2033	0.5465	0.6734	0.005949
1	687884	688147	RLOC_00000231	.	-	187.08	-0.3797	0.03562	0.09965	0.005949
1	688280	688364	RLOC_00000231	.	-	190.13	-0.3444	0.03156	0.0916	0.005949
1	688457	688603	RLOC_00000231	.	-	171.78	-0.3325	0.0006681	0.006681	0.005949
1	688677	688952	RLOC_00000231	.	-	226.43	-0.3039	0.0001712	0.002627	0.005949
1	689035	689158	RLOC_00000231	.	-	207.85	-0.1934	0.06484	0.1508	0.005949
1	689245	689409	RLOC_00000231	.	-	209.73	-0.0853	0.1235	0.2368	0.005949
1	689531	689813	RLOC_00000231	.	-	226.25	-0.0156	0.4168	0.5578	0.005949
1	689975	690173	RLOC_00000231	.	-	145.43	0.2344	0.1936	0.3255	0.005949
1	690173	690225	RLOC_00000231	.	-	4.83	1.0216	0.0655	0.1518	0.005949
1	690284	690398	RLOC_00000231	.	-	7.52	0.9644	0.0465	0.1198	0.005949
1	690398	690579	RLOC_00000231	.	-	113.19	0.4502	0.005561	0.02804	0.005949
1	690748	690898	RLOC_00000231	.	-	96.66	0.4698	0.009949	0.04148	0.005949
1	691120	691364	RLOC_00000231	.	-	101.28	0.6247	0.0003505	0.004337	0.005949
1	691442	692078	RLOC_00000231	.	-	230.94	0.5328	0.005906	0.02922	0.005949
1	692174	692581	RLOC_00000231	.	-	147.59	0.6553	0.004069	0.02266	0.005949
1	697983	698069	RLOC_00000233	.	-	12.22	-0.8332	0.2558	0.3954	0.8122
1	698069	698509	RLOC_00000233	.	-	56.56	0.3676	0.202	0.3356	0.8122
1	701488	701681	RLOC_00000234	.	+	73.27	0.2697	0.2425	0.3808	0.4412
1	701774	701875	RLOC_00000234	.	+	84.48	0.2923	0.1196	0.2314	0.4412
1	702105	702183	RLOC_00000234	.	+	95.69	0.0466	0.6341	0.7447	0.4412
1	702275	702468	RLOC_00000234	.	+	158.70	0.0901	0.2333	0.3708	0.4412
1	702677	702737	RLOC_00000234	.	+	87.81	0.1688	0.1488	0.27	0.4412
1	702811	702902	RLOC_00000234	.	+	78.57	0.1460	0.2431	0.3815	0.4412
1	703011	703098	RLOC_00000234	.	+	97.69	-0.2169	0.2346	0.3722	0.4412
1	703193	703256	RLOC_00000234	.	+	98.19	-0.2746	0.05617	0.1365	0.4412
1	703352	703816	RLOC_00000234	.	+	197.59	-0.3675	0.06836	0.1564	0.4412
1	703907	704499	RLOC_00000235	.	-	696.53	-0.5470	0.00458	0.02456	0.03991
1	704499	704587	RLOC_00000235	.	-	12.29	0.0149	0.5418	0.6693	0.03991
1	704587	704669	RLOC_00000235	.	-	181.73	-0.0999	0.8229	0.8849	0.03991
1	704917	704991	RLOC_00000235	.	-	3.49	-2.3021	0.03417	0.09683	0.03991
1	705062	705129	RLOC_00000235	.	-	172.49	0.0240	0.24	0.3781	0.03991
1	705301	705367	RLOC_00000235	.	-	177.11	0.1642	0.03714	0.1026	0.03991
1	705533	706100	RLOC_00000235	.	-	230.69	0.0629	0.07791	0.1714	0.03991
1	706100	706621	RLOC_00000235	.	-	374.10	0.2583	0.002102	0.01456	0.03991
1	709976	710136	RLOC_00000237	.	-	71.18	-0.1826	0.3924	0.5346	0.8038
1	710239	710333	RLOC_00000237	.	-	88.08	-0.1727	0.2689	0.4098	0.8038
1	710694	710801	RLOC_00000237	.	-	98.51	-0.0382	0.8442	0.8994	0.8038
1	710801	711017	RLOC_00000237	.	-	82.16	0.0645	0.6659	0.7695	0.8038
1	711091	711184	RLOC_00000237	.	-	74.26	-0.0727	0.568	0.6915	0.8038
1	711262	711408	RLOC_00000237	.	-	93.30	0.1586	0.1962	0.3287	0.8038
1	711504	711824	RLOC_00000237	.	-	119.56	0.1067	0.3054	0.4482	0.8038
1	712493	714206	RLOC_00000238	.	-	649.95	-1.0047	1.187e-06	5.625e-05	0.0001194
1	714316	714463	RLOC_00000238	.	-	65.38	0.0631	0.1869	0.3176	0.0001194
1	714557	714864	RLOC_00000238	.	-	99.65	-0.2360	0.9811	0.9894	0.0001194
1	715006	715315	RLOC_00000238	.	-	120.60	-0.5685	0.0207	0.06843	0.0001194
1	715658	716043	RLOC_00000238	.	-	115.67	-0.3547	0.402	0.5436	0.0001194
1	716043	717616	RLOC_00000238	.	-	268.12	-0.1647	0.334	0.4777	0.0001194
1	717616	717759	RLOC_00000238	.	-	44.31	-0.1564	0.2887	0.4309	0.0001194
1	717759	718193	RLOC_00000238	.	-	72.59	-0.1053	0.2003	0.3336	0.0001194
1	718193	718479	RLOC_00000238	.	-	48.16	0.3127	0.02891	0.08613	0.0001194
1	718479	718662	RLOC_00000238	.	-	36.34	0.6851	4.845e-05	0.001064	0.0001194
1	718933	719572	RLOC_00000238	.	-	100.59	0.4056	0.0009171	0.008303	0.0001194
1	719572	720332	RLOC_00000238	.	-	108.30	0.3983	0.003158	0.01917	0.0001194
1	720332	720585	RLOC_00000238	.	-	63.49	-0.0858	0.08175	0.1773	0.0001194
1	720680	720922	RLOC_00000238	.	-	49.31	-0.3318	0.7596	0.8396	0.0001194
1	720922	721090	RLOC_00000238	.	-	33.13	-0.1595	0.1598	0.2841	0.0001194
1	721090	721212	RLOC_00000238	.	-	29.98	0.2397	0.01774	0.06154	0.0001194
1	721212	721795	RLOC_00000238	.	-	75.72	0.2042	0.007495	0.03423	0.0001194
1	721904	722007	RLOC_00000238	.	-	25.66	0.2129	0.1427	0.2621	0.0001194
1	722115	722344	RLOC_00000238	.	-	35.06	0.5162	0.006042	0.02968	0.0001194
1	722344	722560	RLOC_00000238	.	-	27.44	0.8816	0.004093	0.02274	0.0001194
1	722560	722815	RLOC_00000238	.	-	32.02	0.5301	0.001576	0.01198	0.0001194
1	722965	723548	RLOC_00000238	.	-	56.77	0.4285	0.002584	0.01672	0.0001194
1	723548	723600	RLOC_00000238	.	-	19.82	0.6566	0.002097	0.01454	0.0001194
1	723600	723730	RLOC_00000238	.	-	22.30	0.1638	0.08957	0.189	0.0001194
1	723730	724019	RLOC_00000238	.	-	39.08	0.5142	0.001197	0.009942	0.0001194
1	724019	724119	RLOC_00000238	.	-	29.68	0.3389	0.01954	0.06575	0.0001194
1	724274	724389	RLOC_00000238	.	-	24.49	0.1206	0.06343	0.1485	0.0001194
1	724680	724746	RLOC_00000238	.	-	15.17	-0.3334	0.2904	0.4329	0.0001194
1	724889	725081	RLOC_00000238	.	-	24.96	-0.0001	0.1102	0.2184	0.0001194
1	725235	725409	RLOC_00000238	.	-	21.45	0.5831	0.006756	0.03194	0.0001194
1	725551	725608	RLOC_00000238	.	-	13.63	1.1658	0.0005923	0.006145	0.0001194
1	725688	725824	RLOC_00000238	.	-	19.03	0.6573	0.002163	0.01484	0.0001194
1	726036	726122	RLOC_00000238	.	-	17.50	0.4224	0.0674	0.1548	0.0001194
1	726274	726344	RLOC_00000238	.	-	13.93	0.4931	0.04465	0.1164	0.0001194
1	726709	727156	RLOC_00000238	.	-	29.02	0.5216	0.001369	0.01089	0.0001194
1	727282	727464	RLOC_00000238	.	-	9.10	-0.7848	0.4595	0.5975	0.0001194
1	729993	730056	RLOC_00000239	.	+	8.61	0.7688	0.06883	0.1572	0.4969
1	730139	730397	RLOC_00000239	.	+	27.43	0.1601	0.4071	0.5485	0.4969
1	730496	730610	RLOC_00000239	.	+	20.64	0.1737	0.4111	0.5523	0.4969
1	730915	731073	RLOC_00000239	.	+	26.45	-0.1406	0.8574	0.9085	0.4969
1	731175	731498	RLOC_00000239	.	+	33.55	-0.6511	0.1176	0.2287	0.4969
1	731680	732741	RLOC_00000240	.	-	838.58	-1.1314	2.838e-05	0.0007166	0.0001758
1	732927	737081	RLOC_00000240	.	-	1668.41	-0.0287	0.0005811	0.006071	0.0001758
1	737232	737437	RLOC_00000240	.	-	96.23	0.6937	0.01081	0.04389	0.0001758
1	737437	737561	RLOC_00000240	.	-	4.00	3.0784	1.924e-06	8.392e-05	0.0001758
1	737561	737624	RLOC_00000240	.	-	43.26	0.4890	0.001415	0.01113	0.0001758
1	737873	738014	RLOC_00000240	.	-	38.65	0.4229	0.001616	0.01218	0.0001758
1	739690	740051	RLOC_00000241	.	+	438.40	0.3276	0.00737	0.03389	5.247e-07
1	740051	740121	RLOC_00000241	.	+	5.97	1.7796	0.02771	0.08365	5.247e-07
1	740121	740245	RLOC_00000241	.	+	226.94	0.3590	0.00252	0.01644	5.247e-07
1	740352	740503	RLOC_00000241	.	+	240.78	0.5388	4.654e-06	0.0001732	5.247e-07
1	740570	740757	RLOC_00000241	.	+	392.22	0.2497	0.004074	0.02268	5.247e-07
1	740967	741806	RLOC_00000241	.	+	871.89	0.2867	0.0007854	0.007462	5.247e-07
1	741901	742050	RLOC_00000241	.	+	463.10	0.0200	0.494	0.6282	5.247e-07
1	742177	742737	RLOC_00000241	.	+	945.44	0.0068	0.3848	0.5274	5.247e-07
1	742820	742982	RLOC_00000241	.	+	589.50	-0.1792	0.08056	0.1755	5.247e-07
1	742982	743087	RLOC_00000241	.	+	15.52	-0.5971	0.02432	0.07648	5.247e-07
1	743087	743204	RLOC_00000241	.	+	586.52	-0.3496	8.109e-05	0.00155	5.247e-07
1	743298	743546	RLOC_00000241	.	+	836.21	-0.4439	0.0001197	0.002045	5.247e-07
1	743617	744139	RLOC_00000241	.	+	628.90	-0.7355	0.002993	0.01846	5.247e-07
1	744169	744275	RLOC_00000241	.	+	7.32	0.9517	0.06093	0.1444	5.247e-07
1	744371	744786	RLOC_00000241	.	+	10.52	2.8315	1.268e-06	5.933e-05	5.247e-07
1	745039	745121	RLOC_00000241	.	+	5.50	16.2337	9.019e-07	4.494e-05	5.247e-07
1	745373	745549	RLOC_00000241	.	+	6.17	4.2228	1.468e-06	6.686e-05	5.247e-07
1	745732	746087	RLOC_00000241	.	+	9.61	4.1117	2.634e-09	2.408e-07	5.247e-07
1	746203	746289	RLOC_00000241	.	+	3.68	15.6840	3.697e-06	0.0001439	5.247e-07
1	746371	746597	RLOC_00000241	.	+	6.28	16.4645	7.492e-09	6.233e-07	5.247e-07
1	743952	744035	RLOC_00000243	.	-	6.85	-1.6366	0.009224	0.03943	0.001748
1	744035	744337	RLOC_00000243	.	-	20.86	-0.4439	0.0619	0.146	0.001748
1	744509	745369	RLOC_00000243	.	-	44.33	0.0631	0.8316	0.891	0.001748
1	745561	745749	RLOC_00000243	.	-	7.45	-0.1592	0.815	0.8794	0.001748
1	746154	746228	RLOC_00000243	.	-	4.38	0.4827	0.5235	0.6537	0.001748
1	746304	746403	RLOC_00000243	.	-	5.01	0.6180	0.3449	0.4888	0.001748
1	746460	746530	RLOC_00000243	.	-	4.29	2.4447	3.378e-05	0.0008147	0.001748
1	748112	748347	RLOC_00000245	.	-	19.47	-0.5446	0.1665	0.2926	0.7589
1	748574	748694	RLOC_00000245	.	-	12.76	0.3162	0.1975	0.3301	0.7589
1	748694	748765	RLOC_00000245	.	-	10.03	0.3228	0.3307	0.4743	0.7589
1	748817	748998	RLOC_00000245	.	-	8.20	0.0455	0.9101	0.944	0.7589
1	749320	749495	RLOC_00000246	.	+	49.79	0.2051	0.2856	0.4278	0.7792
1	749784	749949	RLOC_00000246	.	+	76.69	-0.0390	0.9544	0.9729	0.7792
1	750117	750298	RLOC_00000246	.	+	63.41	0.1599	0.322	0.4655	0.7792
1	750415	750472	RLOC_00000246	.	+	40.88	0.2518	0.179	0.308	0.7792
1	750556	750627	RLOC_00000246	.	+	35.79	0.1567	0.396	0.538	0.7792
1	750795	750874	RLOC_00000246	.	+	45.37	0.0334	0.7644	0.8431	0.7792
1	750956	751016	RLOC_00000246	.	+	38.74	-0.0580	0.8386	0.8957	0.7792
1	751119	751223	RLOC_00000246	.	+	58.83	-0.1622	0.4622	0.5999	0.7792
1	751296	751357	RLOC_00000246	.	+	45.96	-0.1480	0.5467	0.6736	0.7792
1	751427	751897	RLOC_00000246	.	+	116.30	-0.3078	0.2594	0.3994	0.7792
1	752532	752660	RLOC_00000247	.	+	11.28	-0.3227	0.123	0.2361	0.6479
1	752981	753121	RLOC_00000247	.	+	14.41	0.2630	0.1151	0.2253	0.6479
1	753259	754278	RLOC_00000248	.	-	40499.69	-0.0861	0.1025	0.2076	0.2725
1	754297	754383	RLOC_00000248	.	-	26.92	0.3018	0.2064	0.3405	0.2725
1	754383	754892	RLOC_00000248	.	-	821.05	-0.0626	0.8065	0.8731	0.2725
1	755072	755246	RLOC_00000248	.	-	6.93	-0.7925	0.1147	0.2247	0.2725
1	755379	756279	RLOC_00000248	.	-	1328.33	0.1978	0.02699	0.08215	0.2725
1	754463	754536	RLOC_00000249	.	+	12.62	0.6187	0.08951	0.1889	1.053e-12
1	754536	754926	RLOC_00000249	.	+	37.65	0.7899	0.0004946	0.005463	1.053e-12
1	754926	755203	RLOC_00000249	.	+	19.44	2.7842	2.965e-15	5.093e-13	1.053e-12
1	755203	755339	RLOC_00000249	.	+	13.38	3.2923	1.018e-07	6.61e-06	1.053e-12
1	755339	756538	RLOC_00000249	.	+	354.49	0.3022	0.06361	0.1488	1.053e-12
1	756644	756735	RLOC_00000249	.	+	221.97	-0.0264	0.9256	0.9544	1.053e-12
1	757547	757686	RLOC_00000249	.	+	278.10	-0.0963	0.5364	0.6647	1.053e-12
1	757936	758006	RLOC_00000249	.	+	211.30	-0.2830	0.1478	0.2687	1.053e-12
1	758196	758259	RLOC_00000249	.	+	232.85	-0.4739	0.0669	0.154	1.053e-12
1	758347	758612	RLOC_00000249	.	+	314.44	-0.4691	0.04732	0.1212	1.053e-12
1	761285	761810	RLOC_00000251	.	+	298.93	0.4205	0.005692	0.02851	0.004653
1	761883	762414	RLOC_00000251	.	+	326.08	0.5204	0.0001236	0.002091	0.004653
1	762509	762628	RLOC_00000251	.	+	108.05	0.2969	0.006793	0.03206	0.004653
1	763012	763210	RLOC_00000251	.	+	162.09	0.4164	0.000392	0.004674	0.004653
1	763298	763431	RLOC_00000251	.	+	146.34	0.0424	0.3707	0.5135	0.004653
1	763544	763736	RLOC_00000251	.	+	9.17	0.7523	0.07079	0.1603	0.004653
1	763807	763979	RLOC_00000251	.	+	4.26	0.4613	0.258	0.3979	0.004653
1	763979	764066	RLOC_00000251	.	+	138.25	-0.0614	0.9673	0.9809	0.004653
1	764066	764156	RLOC_00000251	.	+	10.05	0.8123	0.04924	0.1246	0.004653
1	764156	764597	RLOC_00000251	.	+	349.08	0.0933	0.03918	0.1063	0.004653
1	764698	764908	RLOC_00000251	.	+	232.63	-0.1104	0.747	0.8303	0.004653
1	765024	765255	RLOC_00000251	.	+	353.98	-0.3383	0.03752	0.1033	0.004653
1	765483	765602	RLOC_00000251	.	+	292.31	-0.6816	0.0002198	0.003131	0.004653
1	765751	766237	RLOC_00000251	.	+	474.81	-0.6742	0.0003831	0.004602	0.004653
1	767256	767325	RLOC_00000251	.	+	5.25	-0.7014	0.7031	0.7978	0.004653
1	767325	767411	RLOC_00000251	.	+	5.03	-0.2616	0.7858	0.8583	0.004653
1	769912	770014	RLOC_00000253	.	+	5.71	0.9941	0.007468	0.03417	0.1054
1	770014	770071	RLOC_00000253	.	+	6.32	-0.3418	0.8806	0.9243	0.1054
1	770228	770534	RLOC_00000253	.	+	7.99	-0.9511	0.1266	0.241	0.1054
1	773489	773691	RLOC_00000254	.	+	16.59	0.4818	0.1115	0.2203	0.5373
1	774095	774153	RLOC_00000254	.	+	13.90	-0.0930	0.6288	0.7406	0.5373
1	774230	774539	RLOC_00000254	.	+	34.80	0.1980	0.5002	0.6335	0.5373
1	774784	774879	RLOC_00000254	.	+	24.62	0.0300	0.8576	0.9086	0.5373
1	774967	775047	RLOC_00000254	.	+	23.71	-0.1446	0.8115	0.8767	0.5373
1	775121	775299	RLOC_00000254	.	+	19.54	-0.5174	0.07899	0.1731	0.5373
1	775537	775649	RLOC_00000255	.	+	14.44	0.2881	0.4587	0.5967	0.01204
1	775807	776355	RLOC_00000255	.	+	78.57	0.5025	0.0499	0.1258	0.01204
1	776481	776762	RLOC_00000255	.	+	53.39	0.6705	0.001243	0.01019	0.01204
1	777150	777237	RLOC_00000255	.	+	36.55	0.1199	0.6023	0.7195	0.01204
1	777335	777739	RLOC_00000255	.	+	83.57	0.3515	0.1535	0.2762	0.01204
1	777871	778065	RLOC_00000255	.	+	37.73	0.2613	0.3274	0.471	0.01204
1	778152	778333	RLOC_00000255	.	+	36.85	-0.0936	0.6001	0.7176	0.01204
1	778485	778610	RLOC_00000255	.	+	35.29	-0.1566	0.6692	0.7719	0.01204
1	778806	778896	RLOC_00000255	.	+	38.49	-0.0923	0.9717	0.9835	0.01204
1	779001	779080	RLOC_00000255	.	+	41.64	0.0316	0.7691	0.8465	0.01204
1	779173	779250	RLOC_00000255	.	+	51.23	-0.2376	0.2153	0.3507	0.01204
1	779537	779646	RLOC_00000255	.	+	69.12	-0.5284	0.01906	0.06468	0.01204
1	779743	779990	RLOC_00000255	.	+	70.93	-0.7309	0.0004379	0.005035	0.01204
1	780575	780836	RLOC_00000257	.	+	53.84	1.1176	6.771e-08	4.602e-06	9.933e-06
1	781080	781184	RLOC_00000257	.	+	51.53	1.2443	1.729e-07	1.054e-05	9.933e-06
1	782924	783842	RLOC_00000257	.	+	233.17	-0.1543	0.07863	0.1725	9.933e-06
1	783942	784026	RLOC_00000257	.	+	74.35	-0.8066	5.903e-05	0.001234	9.933e-06
1	784132	784308	RLOC_00000257	.	+	67.80	-0.6220	0.003393	0.0201	9.933e-06
1	793352	793733	RLOC_00000261	.	-	448.77	-0.3550	0.05388	0.1327	0.1954
1	793828	793930	RLOC_00000261	.	-	220.54	0.0614	0.3111	0.4542	0.1954
1	793930	794021	RLOC_00000261	.	-	9.12	1.1542	0.01691	0.0596	0.1954
1	794021	794181	RLOC_00000261	.	-	251.43	0.0020	0.7879	0.8599	0.1954
1	794284	794411	RLOC_00000261	.	-	149.36	0.1901	0.2002	0.3335	0.1954
1	794541	794650	RLOC_00000261	.	-	201.43	-0.0513	0.6742	0.7759	0.1954
1	794898	794983	RLOC_00000261	.	-	170.71	-0.0716	0.622	0.7352	0.1954
1	795100	795356	RLOC_00000261	.	-	203.15	0.2329	0.05056	0.1268	0.1954
1	795568	795856	RLOC_00000261	.	-	109.98	-0.3325	0.05674	0.1375	0.1954
1	796535	796631	RLOC_00000261	.	-	62.56	-0.2200	0.3017	0.4445	0.1954
1	796775	796892	RLOC_00000261	.	-	70.47	-0.1204	0.5155	0.6468	0.1954
1	797040	797127	RLOC_00000261	.	-	65.17	0.0110	0.798	0.8672	0.1954
1	797312	797411	RLOC_00000261	.	-	60.19	0.1138	0.4429	0.5822	0.1954
1	797545	797600	RLOC_00000261	.	-	50.00	0.3368	0.1729	0.3006	0.1954
1	797727	797789	RLOC_00000261	.	-	48.33	0.2892	0.2266	0.3633	0.1954
1	798000	798455	RLOC_00000261	.	-	106.26	0.2019	0.16	0.2844	0.1954
1	799171	799431	RLOC_00000262	.	+	14.18	0.0740	0.4342	0.5742	0.2916
1	799998	800112	RLOC_00000262	.	+	12.98	0.2488	0.3906	0.5329	0.2916
1	800381	800465	RLOC_00000262	.	+	12.99	0.3420	0.2192	0.355	0.2916
1	800628	800700	RLOC_00000262	.	+	14.22	0.5448	0.06282	0.1475	0.2916
1	800971	801039	RLOC_00000262	.	+	13.22	0.0952	0.6505	0.7574	0.2916
1	801184	801272	RLOC_00000262	.	+	16.89	0.0057	0.811	0.8764	0.2916
1	801355	801429	RLOC_00000262	.	+	13.49	0.1686	0.4874	0.6224	0.2916
1	801516	801889	RLOC_00000262	.	+	25.60	-0.0544	0.7033	0.7978	0.2916
1	802162	802223	RLOC_00000262	.	+	11.49	-0.7621	0.02975	0.08793	0.2916
1	802319	802531	RLOC_00000262	.	+	18.48	-0.8542	0.03334	0.09519	0.2916
1	803042	803117	RLOC_00000263	.	+	71.84	0.3996	0.03943	0.1068	0.01127
1	803542	803687	RLOC_00000263	.	+	163.12	0.2690	0.001765	0.01294	0.01127
1	803834	803958	RLOC_00000263	.	+	173.65	0.1024	0.1972	0.3298	0.01127
1	804245	804367	RLOC_00000263	.	+	199.21	0.2681	0.0118	0.04664	0.01127
1	804736	804852	RLOC_00000263	.	+	222.95	0.2959	0.008476	0.03724	0.01127
1	804960	805073	RLOC_00000263	.	+	194.05	0.2034	0.03906	0.1061	0.01127
1	805162	805352	RLOC_00000263	.	+	230.18	0.1490	0.0557	0.1357	0.01127
1	805456	805652	RLOC_00000263	.	+	272.30	-0.0011	0.4179	0.5588	0.01127
1	805859	806092	RLOC_00000263	.	+	414.93	-0.1398	0.3564	0.5	0.01127
1	806193	806409	RLOC_00000263	.	+	473.95	-0.4723	0.0004012	0.004746	0.01127
1	806651	807002	RLOC_00000263	.	+	409.50	-0.6517	0.006438	0.03093	0.01127
1	807396	807631	RLOC_00000264	.	+	87.31	0.3557	0.06296	0.1477	0.07368
1	807950	808017	RLOC_00000264	.	+	94.81	0.4113	0.006811	0.03212	0.07368
1	808228	808394	RLOC_00000264	.	+	154.92	0.4432	0.01038	0.04268	0.07368
1	808531	809214	RLOC_00000264	.	+	427.53	0.2697	0.004663	0.02486	0.07368
1	809407	809582	RLOC_00000264	.	+	237.86	-0.1081	0.1714	0.2988	0.07368
1	809671	809788	RLOC_00000264	.	+	256.61	-0.0952	0.3188	0.4622	0.07368
1	809910	810090	RLOC_00000264	.	+	317.01	-0.2053	0.005213	0.02686	0.07368
1	810379	810854	RLOC_00000264	.	+	367.00	-0.3668	0.01451	0.05359	0.07368
1	810892	813016	RLOC_00000265	.	-	279.90	-0.1153	0.004785	0.02532	0.07519
1	813016	813125	RLOC_00000265	.	-	10.77	0.7902	0.02	0.06683	0.07519
1	813461	813517	RLOC_00000266	.	+	40.06	0.7660	0.001543	0.0118	0.001015
1	813517	813604	RLOC_00000266	.	+	90.90	0.3201	5.543e-05	0.00118	0.001015
1	813928	816706	RLOC_00000266	.	+	1936.23	-0.4928	1.656e-05	0.0004799	0.001015
1	817995	818563	RLOC_00000269	.	-	504.05	-0.1481	0.2781	0.4198	0.8907
1	818919	819079	RLOC_00000269	.	-	591.78	0.0363	0.327	0.4707	0.8907
1	819294	819404	RLOC_00000269	.	-	331.18	0.0522	0.4811	0.6168	0.8907
1	819696	819783	RLOC_00000270	.	+	8.80	0.4366	0.1723	0.2999	0.5408
1	819896	820077	RLOC_00000270	.	+	22.98	-0.0170	0.578	0.6999	0.5408
1	820158	820501	RLOC_00000270	.	+	37.53	0.2237	0.07997	0.1745	0.5408
1	820594	820666	RLOC_00000270	.	+	20.52	-0.0598	0.9861	0.9924	0.5408
1	820737	821340	RLOC_00000270	.	+	73.27	-0.3258	0.1227	0.2357	0.5408
1	821340	821405	RLOC_00000270	.	+	8.04	-0.1494	0.9554	0.9735	0.5408
1	824548	824813	RLOC_00000272	.	+	78.30	-0.1124	0.8259	0.887	0.08622
1	824890	824992	RLOC_00000272	.	+	63.18	0.2821	0.01882	0.06413	0.08622
1	825252	825342	RLOC_00000272	.	+	51.66	0.2912	0.02789	0.08404	0.08622
1	825421	825487	RLOC_00000272	.	+	57.97	0.1174	0.124	0.2375	0.08622
1	825586	825655	RLOC_00000272	.	+	55.99	0.0136	0.3608	0.5043	0.08622
1	825744	826334	RLOC_00000272	.	+	190.55	-0.5352	0.005722	0.02862	0.08622
1	826585	826739	RLOC_00000273	.	+	48.65	0.6699	0.009689	0.04077	0.0008813
1	827172	827913	RLOC_00000273	.	+	202.06	0.6113	0.0004198	0.004892	0.0008813
1	827913	829303	RLOC_00000273	.	+	442.73	0.0025	0.3652	0.5084	0.0008813
1	829661	830314	RLOC_00000273	.	+	260.35	-0.7631	1.401e-05	0.0004183	0.0008813
1	830602	831313	RLOC_00000274	.	+	84.39	0.6177	0.01348	0.051	0.0002861
1	831419	831920	RLOC_00000274	.	+	63.33	0.5436	0.01352	0.0511	0.0002861
1	831920	832330	RLOC_00000274	.	+	67.63	0.6382	0.003705	0.0213	0.0002861
1	832330	832640	RLOC_00000274	.	+	62.51	0.2216	0.1314	0.2473	0.0002861
1	832752	832935	RLOC_00000274	.	+	54.64	0.2423	0.1761	0.3046	0.0002861
1	833083	833367	RLOC_00000274	.	+	79.18	0.2055	0.2437	0.3821	0.0002861
1	833453	833571	RLOC_00000274	.	+	43.89	0.0660	0.7717	0.8485	0.0002861
1	833693	833957	RLOC_00000274	.	+	62.55	-0.0992	0.5505	0.6766	0.0002861
1	834159	834253	RLOC_00000274	.	+	7.59	-0.6212	0.7408	0.8259	0.0002861
1	834253	834420	RLOC_00000274	.	+	73.73	-0.4587	0.005254	0.027	0.0002861
1	834513	835276	RLOC_00000274	.	+	213.79	-0.6025	3.45e-06	0.0001361	0.0002861
1	835276	835339	RLOC_00000274	.	+	4.71	-0.1175	0.8618	0.9117	0.0002861
1	835784	836328	RLOC_00000275	.	+	266.77	0.4356	0.0002819	0.003727	0.007334
1	836766	837233	RLOC_00000275	.	+	301.35	0.4750	0.000797	0.007536	0.007334
1	837470	837908	RLOC_00000275	.	+	349.90	0.3098	0.004532	0.02436	0.007334
1	838068	838314	RLOC_00000275	.	+	261.02	0.0648	0.1283	0.2433	0.007334
1	838399	839227	RLOC_00000275	.	+	644.41	0.0866	0.01839	0.06311	0.007334
1	839311	839470	RLOC_00000275	.	+	239.38	-0.0368	0.6126	0.7277	0.007334
1	839677	839805	RLOC_00000275	.	+	234.02	-0.2041	0.3463	0.4902	0.007334
1	839918	840412	RLOC_00000275	.	+	606.22	-0.5219	0.0004148	0.004852	0.007334
1	840506	840951	RLOC_00000275	.	+	403.85	-1.0533	0.0002267	0.0032	0.007334
1	841744	841915	RLOC_00000275	.	+	2.95	2.8894	0.0009501	0.008504	0.007334
1	842369	842477	RLOC_00000275	.	+	2.99	2.5654	0.001319	0.01062	0.007334
1	843823	843958	RLOC_00000275	.	+	3.81	1.0187	0.09265	0.1935	0.007334
1	842753	843553	RLOC_00000277	.	-	675.23	-0.1284	0.1439	0.2636	0.716
1	843553	844197	RLOC_00000277	.	-	520.52	0.1320	0.1451	0.2652	0.716
1	844487	845035	RLOC_00000278	.	-	140.92	0.2719	0.01172	0.04644	0.0002501
1	845113	845435	RLOC_00000278	.	-	110.45	0.4747	0.0002457	0.003389	0.0002501
1	845932	847673	RLOC_00000278	.	-	805.79	-0.3071	2.941e-06	0.0001191	0.0002501
1	846195	846293	RLOC_00000279	.	+	4.75	1.1179	0.03707	0.1025	0
1	846375	846449	RLOC_00000279	.	+	3.89	1.2942	0.04348	0.1143	0
1	846732	847740	RLOC_00000279	.	+	573.17	-1.4369	5.491e-30	2.51e-27	0
1	847886	848227	RLOC_00000279	.	+	290.75	0.7337	2.725e-16	5.175e-14	0
1	848227	848713	RLOC_00000279	.	+	263.97	0.4933	6.766e-11	7.663e-09	0
1	848807	848880	RLOC_00000279	.	+	189.19	0.1210	0.001083	0.009306	0
1	848996	849492	RLOC_00000279	.	+	337.70	-0.1751	0.4	0.5418	0
1	852348	854121	RLOC_00000280	.	+	812.24	-0.1512	1.635e-08	1.266e-06	2.752e-06
1	854184	854235	RLOC_00000280	.	+	2.26	1.4906	0.02029	0.06752	2.752e-06
1	854733	854944	RLOC_00000280	.	+	3.44	2.9494	5.273e-05	0.001135	2.752e-06
1	860853	860905	RLOC_00000282	.	-	18.84	-0.8226	0.1812	0.3107	0.1722
1	860905	861278	RLOC_00000282	.	-	89.32	-0.2962	0.1422	0.2615	0.1722
1	861367	861511	RLOC_00000282	.	-	49.00	-0.2526	0.5249	0.6549	0.1722
1	861605	861909	RLOC_00000282	.	-	58.16	-0.2714	0.4827	0.6182	0.1722
1	862041	862212	RLOC_00000282	.	-	46.13	0.2217	0.09538	0.1974	0.1722
1	862313	862393	RLOC_00000282	.	-	37.92	0.1530	0.2909	0.4333	0.1722
1	862487	862640	RLOC_00000282	.	-	43.62	0.1560	0.1521	0.2745	0.1722
1	862752	862804	RLOC_00000282	.	-	30.43	0.4659	0.01429	0.05299	0.1722
1	863458	863561	RLOC_00000282	.	-	30.32	0.4105	0.01878	0.06403	0.1722
1	863859	864063	RLOC_00000282	.	-	46.64	-0.3343	0.2321	0.3694	0.1722
1	866037	866941	RLOC_00000283	.	-	163.92	-0.0197	0.9607	0.9769	1
1	867408	867516	RLOC_00000283	.	-	28.10	0.1058	0.7373	0.8235	1
1	867629	867726	RLOC_00000283	.	-	11.15	-0.1317	0.7207	0.8109	1
1	868876	869370	RLOC_00000284	.	-	1529.58	-0.3577	0.03278	0.09409	0.1162
1	869370	869453	RLOC_00000284	.	-	9.29	1.0077	0.008515	0.03736	0.1162
1	869453	869553	RLOC_00000284	.	-	992.61	-0.2284	0.01746	0.0609	0.1162
1	869655	869786	RLOC_00000284	.	-	988.66	0.0253	0.4262	0.5666	0.1162
1	869874	869964	RLOC_00000284	.	-	707.24	0.1066	0.1165	0.2273	0.1162
1	870143	870228	RLOC_00000284	.	-	630.43	0.0771	0.1451	0.2652	0.1162
1	870312	870408	RLOC_00000284	.	-	575.59	0.0700	0.3611	0.5046	0.1162
1	870495	871197	RLOC_00000284	.	-	1824.83	0.1715	0.1095	0.2175	0.1162
1	873447	873669	RLOC_00000286	.	+	4.92	-0.4105	0.1346	0.2516	0.6962
1	873669	873805	RLOC_00000286	.	+	3.41	0.6054	0.1418	0.261	0.6962
1	873219	875493	RLOC_00000287	.	-	488.97	0.0008	0.9771	0.9868	1
1	875554	875799	RLOC_00000287	.	-	5.34	-0.0141	0.9697	0.9822	1
1	876406	876811	RLOC_00000288	.	-	19.38	-0.0445	0.991	0.9952	0.9613
1	876964	877075	RLOC_00000288	.	-	5.30	-0.0500	0.7801	0.8543	0.9613
1	877080	877311	RLOC_00000288	.	-	13.84	-0.1187	0.559	0.6839	0.9613
1	877311	877464	RLOC_00000288	.	-	11.29	0.2334	0.407	0.5484	0.9613
1	877865	878655	RLOC_00000290	.	-	375.12	-0.3751	5.54e-06	0.0001993	0.0001361
1	878734	878810	RLOC_00000290	.	-	82.96	0.0253	0.7021	0.797	0.0001361
1	878910	880195	RLOC_00000290	.	-	328.65	0.3166	1.394e-06	6.412e-05	0.0001361
1	880526	881876	RLOC_00000291	.	-	280.06	-0.0879	0.2338	0.3713	0.7838
1	881975	882055	RLOC_00000291	.	-	43.41	0.3047	0.182	0.3117	0.7838
1	882249	883548	RLOC_00000291	.	-	259.01	0.0305	0.649	0.7563	0.7838
1	883814	884004	RLOC_00000292	.	+	6.03	-0.5657	0.9887	0.9938	0.4233
1	884452	884690	RLOC_00000292	.	+	11.17	0.5476	0.0702	0.1593	0.4233
1	884697	884843	RLOC_00000292	.	+	7.26	0.2180	0.4841	0.6195	0.4233
1	884843	885011	RLOC_00000292	.	+	8.96	0.4499	0.1602	0.2847	0.4233
1	885011	885134	RLOC_00000292	.	+	6.43	0.5155	0.2331	0.3706	0.4233
1	885262	886280	RLOC_00000292	.	+	34.54	0.3930	0.1098	0.2179	0.4233
1	886280	886608	RLOC_00000292	.	+	22.41	-0.4892	0.05262	0.1305	0.4233
1	886702	886857	RLOC_00000292	.	+	14.30	-0.0661	0.7628	0.8419	0.4233
1	886991	887447	RLOC_00000292	.	+	25.64	-0.0855	0.7456	0.8292	0.4233
1	887501	888048	RLOC_00000292	.	+	28.83	-0.6020	0.1633	0.2885	0.4233
1	885532	885632	RLOC_00000293	.	-	17.88	-0.4407	0.5973	0.7154	0.003163
1	885632	885939	RLOC_00000293	.	-	215.50	-0.6538	7.39e-05	0.001451	0.003163
1	886034	886101	RLOC_00000293	.	-	123.17	-0.3231	0.07697	0.17	0.003163
1	886392	886461	RLOC_00000293	.	-	108.99	-0.0806	0.7451	0.8288	0.003163
1	886695	886789	RLOC_00000293	.	-	131.51	0.0363	0.5637	0.6879	0.003163
1	886877	886940	RLOC_00000293	.	-	127.81	0.2216	0.1228	0.2358	0.003163
1	887013	887137	RLOC_00000293	.	-	156.38	0.1763	0.1246	0.2382	0.003163
1	887367	887430	RLOC_00000293	.	-	129.27	0.2415	0.08354	0.18	0.003163
1	887530	887635	RLOC_00000293	.	-	148.85	0.2306	0.1074	0.2146	0.003163
1	887724	889524	RLOC_00000293	.	-	452.36	0.1703	0.05564	0.1356	0.003163
1	889768	890024	RLOC_00000293	.	-	40.22	-0.4659	0.01896	0.06444	0.003163
1	893039	893490	RLOC_00000296	.	+	55.73	0.4349	0.009518	0.0403	0.1013
1	893568	894187	RLOC_00000296	.	+	98.81	-0.3400	0.007085	0.033	0.1013
1	894280	894944	RLOC_00000297	.	-	575.07	-0.6148	0.001773	0.01297	0.00172
1	895029	895271	RLOC_00000297	.	-	245.72	-0.2439	0.1626	0.2877	0.00172
1	895346	895473	RLOC_00000297	.	-	192.41	0.0151	0.2511	0.3902	0.00172
1	895581	895921	RLOC_00000297	.	-	278.08	0.2052	0.006345	0.03065	0.00172
1	896013	896482	RLOC_00000297	.	-	269.13	0.3736	3.296e-05	0.0008016	0.00172
1	897355	897540	RLOC_00000297	.	-	51.66	0.3957	0.01233	0.04804	0.00172
1	900746	901426	RLOC_00000300	.	+	1085.00	0.2510	0.008967	0.0387	0.1172
1	901475	902998	RLOC_00000300	.	+	4010.25	-0.2408	0.008607	0.03763	0.1172
1	904238	904420	RLOC_00000301	.	-	36.53	-0.5284	0.08938	0.1887	0.09982
1	904520	904615	RLOC_00000301	.	-	43.58	-0.6952	0.008493	0.03729	0.09982
1	904880	905004	RLOC_00000301	.	-	31.34	-0.4002	0.05953	0.1421	0.09982
1	905118	905173	RLOC_00000301	.	-	19.99	-0.2267	0.7146	0.8061	0.09982
1	905267	905383	RLOC_00000301	.	-	28.34	0.3472	0.1394	0.2578	0.09982
1	905496	905565	RLOC_00000301	.	-	23.88	0.7710	0.00694	0.03252	0.09982
1	905666	905784	RLOC_00000301	.	-	28.46	0.5287	0.04881	0.1239	0.09982
1	905942	906023	RLOC_00000301	.	-	17.40	0.6021	0.06327	0.1483	0.09982
1	906190	906597	RLOC_00000301	.	-	25.99	0.3471	0.5047	0.6373	0.09982
1	907646	907756	RLOC_00000302	.	+	789.49	0.5656	0.001997	0.01407	0.003634
1	907846	907964	RLOC_00000302	.	+	1258.79	0.4878	0.00113	0.009565	0.003634
1	908030	908574	RLOC_00000302	.	+	4147.85	0.1667	0.03064	0.08977	0.003634
1	908651	909013	RLOC_00000302	.	+	3619.72	-0.2507	8.899e-05	0.001658	0.003634
1	909087	909401	RLOC_00000302	.	+	2082.93	-0.4504	0.008022	0.03587	0.003634
1	910129	910481	RLOC_00000304	.	-	69.90	-0.3847	0.008806	0.03822	0.1192
1	910859	911152	RLOC_00000304	.	-	64.14	-0.1331	0.6209	0.7343	0.1192
1	911452	911694	RLOC_00000304	.	-	12.82	0.5803	0.1393	0.2577	0.1192
1	911710	911807	RLOC_00000304	.	-	7.70	0.9051	0.05682	0.1376	0.1192
1	911807	911885	RLOC_00000304	.	-	8.06	0.8938	0.05201	0.1294	0.1192
1	913351	913531	RLOC_00000304	.	-	3.65	1.8913	0.01757	0.06116	0.1192
1	918309	918601	RLOC_00000308	.	+	54.00	0.4466	0.005883	0.02915	0.01167
1	918867	919008	RLOC_00000308	.	+	53.56	0.4745	0.03307	0.09469	0.01167
1	919095	919188	RLOC_00000308	.	+	51.13	0.4199	0.03905	0.1061	0.01167
1	919266	919393	RLOC_00000308	.	+	62.12	0.3236	0.02955	0.08748	0.01167
1	919502	919609	RLOC_00000308	.	+	60.91	-0.0375	0.9812	0.9894	0.01167
1	919736	919817	RLOC_00000308	.	+	59.19	-0.1723	0.3866	0.529	0.01167
1	919912	919996	RLOC_00000308	.	+	83.41	-0.2923	0.0538	0.1325	0.01167
1	920073	920531	RLOC_00000308	.	+	163.43	-0.4019	0.00042	0.004893	0.01167
1	921024	921195	RLOC_00000309	.	+	18.31	0.3772	0.2979	0.4406	0.9057
1	921298	921401	RLOC_00000309	.	+	18.98	-0.1817	0.4999	0.6333	0.9057
1	921610	921867	RLOC_00000309	.	+	23.59	-0.1063	0.6286	0.7404	0.9057
1	923581	923642	RLOC_00000310	.	+	3.52	0.4356	0.2245	0.361	0.8389
1	923827	923895	RLOC_00000310	.	+	3.03	-0.4971	0.2383	0.3763	0.8389
1	933509	933676	RLOC_00000314	.	+	21.19	0.2130	0.3453	0.4891	0.01712
1	933676	934708	RLOC_00000314	.	+	331.19	0.4198	0.0008989	0.008193	0.01712
1	934784	935069	RLOC_00000314	.	+	133.95	0.2249	0.04807	0.1226	0.01712
1	935161	935481	RLOC_00000314	.	+	153.72	0.0884	0.2121	0.3469	0.01712
1	935569	935797	RLOC_00000314	.	+	146.05	0.0827	0.1526	0.2751	0.01712
1	935881	936097	RLOC_00000314	.	+	157.10	-0.0632	0.9701	0.9825	0.01712
1	936188	936572	RLOC_00000314	.	+	258.46	-0.2686	0.05113	0.1279	0.01712
1	936648	937041	RLOC_00000314	.	+	215.59	-0.8372	0.0006953	0.00686	0.01712
1	937930	938309	RLOC_00000318	.	+	28.73	0.7744	0.004942	0.02589	0.01597
1	938423	938530	RLOC_00000318	.	+	11.78	0.3719	0.4668	0.6041	0.01597
1	938633	939800	RLOC_00000318	.	+	82.09	0.5023	0.00165	0.01236	0.01597
1	939875	940002	RLOC_00000318	.	+	27.59	0.3911	0.1624	0.2874	0.01597
1	940091	940367	RLOC_00000318	.	+	41.97	-0.1511	0.2388	0.3768	0.01597
1	940452	940678	RLOC_00000318	.	+	49.17	-0.5312	0.0009671	0.008607	0.01597
1	940772	941174	RLOC_00000318	.	+	56.27	-0.6525	0.0006343	0.006446	0.01597
1	941089	941267	RLOC_00000319	.	-	60.59	-0.4693	0.001441	0.01127	0.02981
1	941365	941431	RLOC_00000319	.	-	67.17	-0.2825	0.01462	0.05383	0.02981
1	941693	941794	RLOC_00000319	.	-	86.57	-0.1847	0.06892	0.1573	0.02981
1	942030	942105	RLOC_00000319	.	-	66.61	0.1208	0.659	0.764	0.02981
1	942186	942567	RLOC_00000319	.	-	97.28	0.3584	0.01353	0.05112	0.02981
1	942652	942820	RLOC_00000319	.	-	35.14	0.2539	0.3149	0.4582	0.02981
1	942979	943039	RLOC_00000319	.	-	24.82	0.3923	0.3445	0.4884	0.02981
1	943122	943352	RLOC_00000319	.	-	35.29	0.7144	0.04191	0.1114	0.02981
1	944625	944982	RLOC_00000320	.	+	35.05	0.6625	0.01766	0.06137	0.2013
1	945116	945168	RLOC_00000320	.	+	14.53	0.4234	0.2172	0.3528	0.2013
1	945471	945530	RLOC_00000320	.	+	15.91	0.3423	0.3995	0.5414	0.2013
1	945779	945861	RLOC_00000320	.	+	18.95	-0.1517	0.5061	0.6384	0.2013
1	945951	946072	RLOC_00000320	.	+	24.97	0.1626	0.4818	0.6174	0.2013
1	946308	946812	RLOC_00000320	.	+	82.69	0.1913	0.1882	0.3191	0.2013
1	946893	947001	RLOC_00000320	.	+	52.92	-0.2269	0.2077	0.3419	0.2013
1	947122	947293	RLOC_00000320	.	+	74.22	-0.3786	0.07942	0.1737	0.2013
1	947398	947608	RLOC_00000320	.	+	44.93	-0.4043	0.2591	0.399	0.2013
1	947645	948009	RLOC_00000321	.	-	49.50	-0.5564	0.06915	0.1577	0.1472
1	948087	948147	RLOC_00000321	.	-	26.63	-0.7035	0.01159	0.0461	0.1472
1	948234	948343	RLOC_00000321	.	-	31.50	-0.3481	0.06848	0.1566	0.1472
1	948428	948595	RLOC_00000321	.	-	37.67	-0.1256	0.6275	0.7395	0.1472
1	948696	948816	RLOC_00000321	.	-	30.07	-0.0621	0.7882	0.8601	0.1472
1	948911	948992	RLOC_00000321	.	-	19.57	-0.0272	0.9651	0.9796	0.1472
1	949075	949207	RLOC_00000321	.	-	22.93	-0.1665	0.6695	0.7722	0.1472
1	949296	949407	RLOC_00000321	.	-	19.30	-0.0828	0.8348	0.893	0.1472
1	949733	949796	RLOC_00000321	.	-	19.24	0.0133	0.8124	0.8774	0.1472
1	949882	950125	RLOC_00000321	.	-	35.87	0.1357	0.3398	0.4836	0.1472
1	950197	950311	RLOC_00000321	.	-	23.47	0.7194	0.01577	0.05674	0.1472
1	950403	950500	RLOC_00000321	.	-	14.94	0.6146	0.0923	0.193	0.1472
1	950581	950794	RLOC_00000321	.	-	22.52	0.4683	0.08805	0.1867	0.1472
1	950880	951041	RLOC_00000321	.	-	16.35	0.4946	0.09913	0.2029	0.1472
1	951125	951211	RLOC_00000321	.	-	10.43	0.6108	0.1532	0.2759	0.1472
1	951527	951766	RLOC_00000321	.	-	18.27	0.6075	0.03996	0.1078	0.1472
1	954552	954960	RLOC_00000322	.	+	17.22	0.1074	0.7532	0.835	0.5119
1	954960	955095	RLOC_00000322	.	+	9.25	1.0018	0.07247	0.163	0.5119
1	955095	955175	RLOC_00000322	.	+	7.96	0.0391	0.9789	0.988	0.5119
1	955242	955813	RLOC_00000322	.	+	33.79	-0.3640	0.0886	0.1876	0.5119
1	957529	957687	RLOC_00000324	.	+	6.85	0.0071	0.8353	0.8934	1
1	957687	957768	RLOC_00000324	.	+	5.43	-0.0087	0.827	0.8878	1
1	961782	963177	RLOC_00000327	.	-	178.77	-0.7332	0.001603	0.01211	0.03241
1	963177	963321	RLOC_00000327	.	-	25.76	0.1554	0.2113	0.346	0.03241
1	963468	963546	RLOC_00000327	.	-	21.71	-0.1145	0.7335	0.8204	0.03241
1	963638	964191	RLOC_00000327	.	-	53.98	0.0379	0.1701	0.2971	0.03241
1	964294	964380	RLOC_00000327	.	-	18.09	0.1685	0.2569	0.3967	0.03241
1	964503	964626	RLOC_00000327	.	-	21.69	0.0248	0.3318	0.4754	0.03241
1	964738	964873	RLOC_00000327	.	-	23.41	-0.2438	0.8226	0.8847	0.03241
1	964951	965041	RLOC_00000327	.	-	19.61	-0.4000	0.7019	0.7968	0.03241
1	965123	965309	RLOC_00000327	.	-	25.46	0.0274	0.3432	0.487	0.03241
1	965452	965506	RLOC_00000327	.	-	16.09	0.0638	0.3881	0.5306	0.03241
1	965598	965736	RLOC_00000327	.	-	16.03	0.5245	0.0593	0.1417	0.03241
1	965822	965888	RLOC_00000327	.	-	9.75	1.1772	0.004733	0.02512	0.03241
1	965995	966157	RLOC_00000327	.	-	10.86	0.8970	0.008851	0.03835	0.03241
1	966450	966704	RLOC_00000327	.	-	12.96	0.3902	0.06639	0.1533	0.03241
1	967714	967924	RLOC_00000328	.	-	5.21	-0.0134	0.8851	0.9276	0.7738
1	968069	968377	RLOC_00000328	.	-	12.61	0.0516	0.6277	0.7397	0.7738
1	968466	968568	RLOC_00000328	.	-	9.24	0.3730	0.5321	0.6611	0.7738
1	969469	969554	RLOC_00000328	.	-	8.00	-0.6010	0.1757	0.304	0.7738
1	976016	976110	RLOC_00000329	.	-	11.13	0.8125	0.03405	0.09658	0.1172
1	976253	976548	RLOC_00000329	.	-	23.41	0.2488	0.1335	0.2501	0.1172
1	977100	977752	RLOC_00000329	.	-	447.21	-0.2068	0.008607	0.03763	0.1172
1	979337	979803	RLOC_00000330	.	-	664.16	-0.2452	0.08769	0.1862	0.332
1	979889	980103	RLOC_00000330	.	-	608.64	-0.1121	0.0801	0.1748	0.332
1	980183	980356	RLOC_00000330	.	-	451.00	-0.0064	0.8813	0.9248	0.332
1	980777	980895	RLOC_00000330	.	-	300.79	0.1657	0.03595	0.1003	0.332
1	980984	981162	RLOC_00000330	.	-	366.78	0.2094	0.04309	0.1135	0.332
1	981772	981870	RLOC_00000330	.	-	198.25	0.2359	0.07295	0.1638	0.332
1	986857	987024	RLOC_00000332	.	+	8.79	0.0122	0.8432	0.8988	1
1	987677	987754	RLOC_00000332	.	+	8.39	-0.0123	0.8411	0.8974	1
1	991165	991747	RLOC_00000334	.	+	1079.59	0.1155	0.08186	0.1775	0.3284
1	992084	992691	RLOC_00000334	.	+	953.80	0.0152	0.7373	0.8235	0.3284
1	992775	993113	RLOC_00000334	.	+	667.88	-0.2100	0.03538	0.09923	0.3284
1	993443	993631	RLOC_00000335	.	+	10.30	0.2155	0.556	0.6814	0.6372
1	993898	993951	RLOC_00000335	.	+	4.93	-0.3755	0.4817	0.6173	0.6372
1	994045	994206	RLOC_00000335	.	+	14.84	0.2818	0.2135	0.3486	0.6372
1	994353	994405	RLOC_00000335	.	+	10.47	0.4902	0.128	0.2428	0.6372
1	994495	994632	RLOC_00000335	.	+	15.96	0.1139	0.482	0.6176	0.6372
1	994827	994914	RLOC_00000335	.	+	14.64	-0.2409	0.5486	0.6752	0.6372
1	995312	995726	RLOC_00000335	.	+	32.79	-0.3892	0.1109	0.2194	0.6372
1	996127	996217	RLOC_00000336	.	+	75.98	0.2502	0.1171	0.2281	0.005134
1	996425	996734	RLOC_00000336	.	+	236.92	0.2558	0.03104	0.09058	0.005134
1	996846	996939	RLOC_00000336	.	+	157.83	0.3866	0.0001408	0.002289	0.005134
1	997176	997276	RLOC_00000336	.	+	179.42	0.0740	0.1127	0.222	0.005134
1	997417	997490	RLOC_00000336	.	+	202.16	-0.1081	0.9478	0.9687	0.005134
1	997602	997666	RLOC_00000336	.	+	188.35	-0.0991	0.8668	0.9152	0.005134
1	997753	997896	RLOC_00000336	.	+	251.43	0.1002	0.1037	0.2094	0.005134
1	998419	998515	RLOC_00000336	.	+	166.28	0.1300	0.1181	0.2294	0.005134
1	998732	999017	RLOC_00000336	.	+	274.55	0.1503	0.03143	0.09133	0.005134
1	999108	999411	RLOC_00000336	.	+	357.46	0.0237	0.1745	0.3027	0.005134
1	999503	999680	RLOC_00000336	.	+	306.28	-0.0136	0.3269	0.4706	0.005134
1	999757	1000027	RLOC_00000336	.	+	480.45	-0.4098	0.06868	0.1569	0.005134
1	1000111	1000458	RLOC_00000336	.	+	482.62	-0.9364	0.001456	0.01134	0.005134
1	1001501	1001624	RLOC_00000337	.	+	5.42	0.1548	0.6434	0.7519	0.0723
1	1001808	1002004	RLOC_00000337	.	+	4.98	-0.1027	0.8303	0.8901	0.0723
1	1002197	1002384	RLOC_00000337	.	+	8.81	0.1546	0.6457	0.7538	0.0723
1	1002471	1002687	RLOC_00000337	.	+	15.62	0.2262	0.2949	0.4374	0.0723
1	1002782	1002862	RLOC_00000337	.	+	12.58	0.3971	0.1734	0.3012	0.0723
1	1002947	1003032	RLOC_00000337	.	+	10.57	0.1002	0.6451	0.7533	0.0723
1	1003136	1003268	RLOC_00000337	.	+	7.93	0.3838	0.342	0.4859	0.0723
1	1003388	1003502	RLOC_00000337	.	+	6.56	0.4159	0.3505	0.4942	0.0723
1	1003809	1003878	RLOC_00000337	.	+	8.28	0.0437	0.737	0.8233	0.0723
1	1003970	1004027	RLOC_00000337	.	+	10.22	-0.8828	0.07448	0.1661	0.0723
1	1004124	1004283	RLOC_00000337	.	+	10.95	-1.1968	0.004554	0.02445	0.0723
1	1004822	1005514	RLOC_00000338	.	+	250.61	0.3008	0.003183	0.01927	0.009332
1	1005745	1005815	RLOC_00000338	.	+	103.43	0.1556	0.1699	0.2968	0.009332
1	1005925	1006074	RLOC_00000338	.	+	120.55	0.2541	0.1773	0.3061	0.009332
1	1006175	1006271	RLOC_00000338	.	+	130.15	0.2085	0.3031	0.4459	0.009332
1	1006427	1006513	RLOC_00000338	.	+	125.37	0.1220	0.5436	0.6709	0.009332
1	1006576	1006642	RLOC_00000338	.	+	166.25	0.0243	0.8106	0.8761	0.009332
1	1006733	1006797	RLOC_00000338	.	+	164.09	-0.0091	0.8887	0.93	0.009332
1	1006916	1007001	RLOC_00000338	.	+	209.05	0.0214	0.8878	0.9294	0.009332
1	1007001	1007080	RLOC_00000338	.	+	4.46	0.7983	0.188	0.3189	0.009332
1	1007080	1007209	RLOC_00000338	.	+	205.12	0.0167	0.8133	0.8781	0.009332
1	1007289	1007525	RLOC_00000338	.	+	221.95	-0.0881	0.5931	0.7119	0.009332
1	1007600	1007732	RLOC_00000338	.	+	242.45	-0.1839	0.06876	0.1571	0.009332
1	1007826	1008301	RLOC_00000338	.	+	385.08	-0.3178	0.0003124	0.003999	0.009332
1	1008531	1009851	RLOC_00000339	.	+	113.70	-0.0140	0.8161	0.8801	1
1	1009851	1011145	RLOC_00000339	.	+	198.93	0.0111	0.8152	0.8795	1
1	1009469	1009718	RLOC_00000340	.	-	8.33	-1.3624	0.00468	0.02493	0.07386
1	1009839	1010038	RLOC_00000340	.	-	6.50	0.6327	0.1287	0.2438	0.07386
1	1010038	1010178	RLOC_00000340	.	-	5.11	0.1452	0.4642	0.6016	0.07386
1	1010178	1010494	RLOC_00000340	.	-	9.95	-0.1520	0.9195	0.9503	0.07386
1	1010494	1010738	RLOC_00000340	.	-	7.17	0.3716	0.3316	0.4752	0.07386
1	1010738	1010880	RLOC_00000340	.	-	2.95	0.9358	0.1235	0.2369	0.07386
1	1011227	1011433	RLOC_00000341	.	-	130.79	-0.3173	0.1491	0.2705	0.06502
1	1011500	1011558	RLOC_00000341	.	-	147.33	-0.2812	0.0633	0.1483	0.06502
1	1011777	1011858	RLOC_00000341	.	-	162.51	-0.1797	0.05715	0.1382	0.06502
1	1011941	1012013	RLOC_00000341	.	-	167.49	-0.1793	0.07813	0.1717	0.06502
1	1012164	1012236	RLOC_00000341	.	-	136.52	0.2261	0.1004	0.2047	0.06502
1	1012333	1012444	RLOC_00000341	.	-	147.79	0.3087	0.01779	0.06165	0.06502
1	1012507	1012559	RLOC_00000341	.	-	106.10	0.3923	0.003964	0.02228	0.06502
1	1013178	1013350	RLOC_00000341	.	-	81.12	0.1855	0.3178	0.4612	0.06502
1	1013738	1014543	RLOC_00000342	.	+	95.89	0.3468	0.03946	0.1068	0.3399
1	1014620	1014676	RLOC_00000342	.	+	17.54	-0.1766	0.6113	0.7267	0.3399
1	1014766	1014872	RLOC_00000342	.	+	39.79	0.3616	0.04349	0.1143	0.3399
1	1014950	1015050	RLOC_00000342	.	+	35.27	0.3640	0.1878	0.3186	0.3399
1	1015198	1015304	RLOC_00000342	.	+	33.40	0.1244	0.5537	0.6795	0.3399
1	1015427	1015518	RLOC_00000342	.	+	38.59	0.0332	0.7707	0.8477	0.3399
1	1015683	1015825	RLOC_00000342	.	+	57.20	-0.0569	0.9047	0.9405	0.3399
1	1016078	1016449	RLOC_00000342	.	+	90.36	-0.1140	0.5435	0.6708	0.3399
1	1016794	1016951	RLOC_00000342	.	+	72.75	0.0525	0.6962	0.7924	0.3399
1	1017057	1017184	RLOC_00000342	.	+	57.95	0.1365	0.3213	0.4648	0.3399
1	1017331	1017481	RLOC_00000342	.	+	79.68	-0.4367	0.0372	0.1027	0.3399
1	1017567	1017857	RLOC_00000342	.	+	87.61	-0.4088	0.06012	0.143	0.3399
1	1024652	1025137	RLOC_00000347	.	-	55.19	0.1148	0.05782	0.1393	3.223e-06
1	1025366	1025587	RLOC_00000347	.	-	28.45	0.4397	0.006915	0.03246	3.223e-06
1	1026065	1027320	RLOC_00000347	.	-	106.08	0.5239	8.097e-05	0.001549	3.223e-06
1	1027342	1027564	RLOC_00000347	.	-	21.98	0.6833	0.004093	0.02274	3.223e-06
1	1028078	1029096	RLOC_00000347	.	-	394.43	-0.6062	1.946e-08	1.483e-06	3.223e-06
1	1031184	1031241	RLOC_00000349	.	-	3.43	-0.2661	0.8585	0.9092	0.1127
1	1031241	1031573	RLOC_00000349	.	-	34.80	-0.8909	0.008165	0.03632	0.1127
1	1031688	1031784	RLOC_00000349	.	-	36.36	-0.2897	0.3756	0.5185	0.1127
1	1031900	1031985	RLOC_00000349	.	-	37.52	-0.0795	0.6861	0.7849	0.1127
1	1032058	1032163	RLOC_00000349	.	-	36.28	-0.0326	0.9099	0.9439	0.1127
1	1032243	1032412	RLOC_00000349	.	-	45.17	-0.0661	0.7093	0.8023	0.1127
1	1032581	1032653	RLOC_00000349	.	-	29.81	-0.2123	0.3616	0.505	0.1127
1	1032807	1032859	RLOC_00000349	.	-	23.13	0.1941	0.5467	0.6735	0.1127
1	1033186	1033281	RLOC_00000349	.	-	20.07	-0.0219	0.8873	0.9291	0.1127
1	1033465	1033537	RLOC_00000349	.	-	19.12	-0.4401	0.2121	0.3469	0.1127
1	1033875	1034029	RLOC_00000349	.	-	31.11	0.1641	0.4627	0.6003	0.1127
1	1034121	1034345	RLOC_00000349	.	-	37.21	0.4176	0.09383	0.1952	0.1127
1	1034701	1034778	RLOC_00000349	.	-	20.05	0.5048	0.1116	0.2205	0.1127
1	1034885	1035055	RLOC_00000349	.	-	23.53	0.6839	0.0398	0.1075	0.1127
1	1035139	1035284	RLOC_00000349	.	-	19.67	0.1728	0.4062	0.5478	0.1127
1	1035382	1035518	RLOC_00000349	.	-	22.65	0.0712	0.6874	0.7858	0.1127
1	1035885	1036168	RLOC_00000349	.	-	25.43	0.2996	0.2159	0.3513	0.1127
1	1036572	1036692	RLOC_00000350	.	+	12.35	0.1024	0.5636	0.6879	0.1589
1	1036796	1036850	RLOC_00000350	.	+	14.08	0.1438	0.4588	0.5968	0.1589
1	1036943	1037014	RLOC_00000350	.	+	16.53	0.2717	0.2378	0.3757	0.1589
1	1037088	1037441	RLOC_00000350	.	+	40.86	0.2570	0.1781	0.307	0.1589
1	1037530	1037746	RLOC_00000350	.	+	33.22	0.5705	0.01287	0.04939	0.1589
1	1037920	1038175	RLOC_00000350	.	+	43.38	0.0401	0.5787	0.7004	0.1589
1	1038275	1038376	RLOC_00000350	.	+	31.67	-0.0991	0.8515	0.9045	0.1589
1	1038518	1038705	RLOC_00000350	.	+	49.57	-0.2549	0.4478	0.5867	0.1589
1	1038800	1038898	RLOC_00000350	.	+	42.16	-0.1882	0.3062	0.4491	0.1589
1	1038994	1039085	RLOC_00000350	.	+	28.53	-0.0006	0.9861	0.9924	0.1589
1	1039223	1039389	RLOC_00000350	.	+	32.38	0.1712	0.4481	0.587	0.1589
1	1039487	1039606	RLOC_00000350	.	+	30.61	-0.2285	0.3707	0.5135	0.1589
1	1039694	1040165	RLOC_00000350	.	+	61.86	-0.3699	0.09219	0.1929	0.1589
1	1040421	1040628	RLOC_00000351	.	+	18.57	-0.3992	0.3576	0.5012	0.5735
1	1040628	1040680	RLOC_00000351	.	+	15.49	-0.0611	0.9661	0.9802	0.5735
1	1040873	1040974	RLOC_00000351	.	+	16.78	0.4128	0.2025	0.3361	0.5735
1	1041048	1042093	RLOC_00000351	.	+	109.25	0.1352	0.3871	0.5296	0.5735
1	1042238	1042346	RLOC_00000351	.	+	33.27	-0.1238	0.4038	0.5453	0.5735
1	1042429	1042504	RLOC_00000351	.	+	9.73	0.8089	0.08927	0.1886	0.5735
1	1042504	1042567	RLOC_00000351	.	+	9.46	0.5905	0.1218	0.2345	0.5735
1	1042567	1042810	RLOC_00000351	.	+	41.32	-0.3413	0.09803	0.2013	0.5735
1	1042330	1042744	RLOC_00000352	.	-	539.88	-0.0908	0.3768	0.5196	0.5018
1	1042893	1042952	RLOC_00000352	.	-	5.82	1.3801	0.07008	0.1591	0.5018
1	1042952	1043164	RLOC_00000352	.	-	387.53	-0.0227	0.3942	0.5363	0.5018
1	1043391	1043853	RLOC_00000352	.	-	386.11	0.1589	0.2192	0.355	0.5018
1	1045711	1045995	RLOC_00000354	.	-	21.31	-0.2546	0.1646	0.2901	0.05606
1	1046098	1046195	RLOC_00000354	.	-	16.22	-0.6589	0.01687	0.05949	0.05606
1	1046328	1046379	RLOC_00000354	.	-	14.72	-0.6329	0.008436	0.03713	0.05606
1	1046469	1046536	RLOC_00000354	.	-	11.54	-0.3024	0.2537	0.3931	0.05606
1	1046623	1046877	RLOC_00000354	.	-	17.98	-0.1255	0.2824	0.4244	0.05606
1	1046986	1047697	RLOC_00000354	.	-	36.68	0.7179	0.003267	0.01959	0.05606
1	1047697	1047864	RLOC_00000354	.	-	9.90	0.8285	0.1386	0.2568	0.05606
1	1048151	1048254	RLOC_00000354	.	-	9.40	-0.4389	0.1283	0.2433	0.05606
1	1048309	1048402	RLOC_00000354	.	-	6.73	0.3911	0.6518	0.7583	0.05606
1	1048498	1048630	RLOC_00000354	.	-	7.63	0.7535	0.2332	0.3707	0.05606
1	1049122	1049209	RLOC_00000354	.	-	5.91	1.3341	0.01687	0.05949	0.05606
1	1051319	1051491	RLOC_00000356	.	+	141.16	0.5923	0.0002335	0.003266	0.001218
1	1051767	1052038	RLOC_00000356	.	+	337.31	0.4765	9.99e-05	0.001798	0.001218
1	1052159	1052270	RLOC_00000356	.	+	286.02	0.2852	0.0009292	0.008377	0.001218
1	1052543	1053095	RLOC_00000356	.	+	470.35	0.3593	0.0001698	0.00261	0.001218
1	1053095	1053187	RLOC_00000356	.	+	48.30	0.5913	0.002753	0.01742	0.001218
1	1053325	1053494	RLOC_00000356	.	+	343.66	0.2043	0.01418	0.05271	0.001218
1	1053806	1054200	RLOC_00000356	.	+	620.67	0.0174	0.2316	0.3689	0.001218
1	1054200	1054806	RLOC_00000356	.	+	479.09	-0.0787	0.7434	0.8278	0.001218
1	1054934	1055088	RLOC_00000356	.	+	385.36	-0.0814	0.7492	0.832	0.001218
1	1055173	1055291	RLOC_00000356	.	+	317.57	0.0659	0.1842	0.3144	0.001218
1	1055476	1055708	RLOC_00000356	.	+	564.13	-0.0834	0.5301	0.6594	0.001218
1	1055796	1056104	RLOC_00000356	.	+	806.87	-0.4361	2.083e-05	0.0005705	0.001218
1	1056184	1056288	RLOC_00000356	.	+	441.29	-0.5091	2.984e-05	0.0007442	0.001218
1	1056432	1056778	RLOC_00000356	.	+	411.30	-0.4715	0.005035	0.02623	0.001218
1	1059486	1060080	RLOC_00000358	.	+	84.26	0.0273	0.9978	0.9995	1
1	1060323	1060634	RLOC_00000358	.	+	76.55	-0.0629	0.6979	0.7937	1
1	1060731	1060864	RLOC_00000358	.	+	61.57	0.0063	0.8398	0.8964	1
1	1060956	1061164	RLOC_00000358	.	+	39.43	0.0661	0.7528	0.8347	1
1	1061415	1061786	RLOC_00000360	.	-	23.53	-0.6547	0.0878	0.1863	0.3177
1	1061786	1061863	RLOC_00000360	.	-	9.63	-0.0891	0.8001	0.8687	0.3177
1	1062004	1062138	RLOC_00000360	.	-	6.86	0.7732	0.03365	0.09578	0.3177
1	1062230	1062281	RLOC_00000360	.	-	4.58	0.9503	0.0845	0.1814	0.3177
1	1062461	1063087	RLOC_00000360	.	-	24.09	-0.1174	0.874	0.9199	0.3177
1	1063157	1063593	RLOC_00000360	.	-	13.65	0.1493	0.5068	0.6391	0.3177
1	1063661	1063752	RLOC_00000360	.	-	3.44	-0.5182	0.7282	0.8164	0.3177
1	1064472	1064560	RLOC_00000361	.	-	10.43	1.0955	0.03661	0.1016	5.809e-07
1	1064560	1064961	RLOC_00000361	.	-	315.72	-0.7499	0.0006161	0.006317	5.809e-07
1	1065054	1065294	RLOC_00000361	.	-	276.12	-0.6066	0.0002033	0.002969	5.809e-07
1	1065379	1065444	RLOC_00000361	.	-	162.25	-0.4788	0.001052	0.009122	5.809e-07
1	1065548	1065855	RLOC_00000361	.	-	299.85	-0.4720	4.485e-06	0.0001684	5.809e-07
1	1065934	1066149	RLOC_00000361	.	-	215.45	-0.2427	0.06739	0.1548	5.809e-07
1	1066229	1066526	RLOC_00000361	.	-	216.21	-0.0600	0.7278	0.8161	5.809e-07
1	1066606	1066772	RLOC_00000361	.	-	133.18	0.1616	0.1576	0.2814	5.809e-07
1	1066850	1067550	RLOC_00000361	.	-	344.00	0.1975	0.01475	0.05416	5.809e-07
1	1067762	1067850	RLOC_00000361	.	-	97.87	0.2018	0.1276	0.2423	5.809e-07
1	1067926	1068247	RLOC_00000361	.	-	177.64	0.3276	0.0006829	0.006775	5.809e-07
1	1068356	1069611	RLOC_00000361	.	-	389.81	0.5530	0.0003189	0.004059	5.809e-07
1	1069611	1069949	RLOC_00000361	.	-	121.46	0.7393	0.002871	0.01794	5.809e-07
1	1069949	1070494	RLOC_00000361	.	-	152.79	0.7972	0.0005772	0.006051	5.809e-07
1	1070687	1070911	RLOC_00000361	.	-	56.27	0.9185	2.957e-09	2.675e-07	5.809e-07
1	1073417	1073569	RLOC_00000363	.	+	39.47	0.0500	0.7476	0.8308	0.1106
1	1073648	1073861	RLOC_00000363	.	+	74.87	0.1691	0.2042	0.338	0.1106
1	1073939	1074131	RLOC_00000363	.	+	72.07	-0.0453	0.7024	0.7972	0.1106
1	1074224	1074427	RLOC_00000363	.	+	81.66	0.0112	0.9781	0.9875	0.1106
1	1074529	1074610	RLOC_00000363	.	+	70.88	-0.0794	0.6502	0.7572	0.1106
1	1074897	1075021	RLOC_00000363	.	+	71.70	-0.0917	0.4446	0.5837	0.1106
1	1075107	1075200	RLOC_00000363	.	+	70.98	-0.1641	0.3239	0.4675	0.1106
1	1075300	1075503	RLOC_00000363	.	+	73.01	-0.0536	0.9971	0.9992	0.1106
1	1075503	1075567	RLOC_00000363	.	+	13.52	0.9943	0.007968	0.0357	0.1106
1	1075544	1076012	RLOC_00000364	.	-	936.17	-0.8597	0.0003704	0.004505	0.0001452
1	1076118	1076226	RLOC_00000364	.	-	560.93	-0.5582	0.0002482	0.003414	0.0001452
1	1076309	1076679	RLOC_00000364	.	-	615.19	-0.4274	0.0003707	0.004507	0.0001452
1	1076871	1076932	RLOC_00000364	.	-	313.16	-0.2879	0.07713	0.1703	0.0001452
1	1077035	1077238	RLOC_00000364	.	-	519.86	-0.2376	0.1609	0.2856	0.0001452
1	1077340	1078353	RLOC_00000364	.	-	1427.45	0.0950	0.02918	0.08669	0.0001452
1	1078426	1078554	RLOC_00000364	.	-	410.65	0.2546	0.002508	0.01638	0.0001452
1	1078681	1078749	RLOC_00000364	.	-	284.30	0.2686	0.0008844	0.008099	0.0001452
1	1078837	1078946	RLOC_00000364	.	-	296.04	0.4055	0.0002644	0.003561	0.0001452
1	1079245	1079330	RLOC_00000364	.	-	232.25	0.5327	1.509e-06	6.845e-05	0.0001452
1	1079409	1079526	RLOC_00000364	.	-	282.81	0.5446	1.016e-05	0.0003257	0.0001452
1	1079619	1079781	RLOC_00000364	.	-	381.08	0.3953	0.0005473	0.005832	0.0001452
1	1079971	1080054	RLOC_00000364	.	-	2.64	1.6150	0.03304	0.09462	0.0001452
1	1080231	1080571	RLOC_00000364	.	-	376.43	0.3871	0.007764	0.03508	0.0001452
1	1086292	1086497	RLOC_00000366	.	+	9.52	0.4403	0.1223	0.2351	0.008819
1	1087113	1087240	RLOC_00000366	.	+	8.47	1.5195	0.003524	0.0206	0.008819
1	1087405	1087513	RLOC_00000366	.	+	7.21	1.6563	0.002801	0.01763	0.008819
1	1087656	1087802	RLOC_00000366	.	+	6.59	1.7446	0.0005301	0.00571	0.008819
1	1087889	1088049	RLOC_00000366	.	+	8.01	1.5599	0.000617	0.006323	0.008819
1	1088250	1088309	RLOC_00000366	.	+	5.88	0.7334	0.146	0.2664	0.008819
1	1088410	1088570	RLOC_00000366	.	+	8.09	0.6977	0.1624	0.2874	0.008819
1	1088894	1089031	RLOC_00000366	.	+	9.51	0.6052	0.2228	0.3591	0.008819
1	1089134	1089267	RLOC_00000366	.	+	9.65	0.0286	0.9855	0.992	0.008819
1	1089401	1089494	RLOC_00000366	.	+	6.34	1.1260	0.02934	0.08703	0.008819
1	1089911	1089969	RLOC_00000366	.	+	6.56	1.2355	0.003704	0.0213	0.008819
1	1090060	1090162	RLOC_00000366	.	+	8.16	1.1437	0.002774	0.01752	0.008819
1	1090585	1090689	RLOC_00000366	.	+	7.48	0.4265	0.09926	0.2031	0.008819
1	1090814	1090982	RLOC_00000366	.	+	7.99	1.0591	0.02237	0.07226	0.008819
1	1091303	1091413	RLOC_00000366	.	+	9.52	0.4072	0.156	0.2793	0.008819
1	1091501	1091562	RLOC_00000366	.	+	7.12	0.5328	0.1084	0.216	0.008819
1	1091655	1091821	RLOC_00000366	.	+	13.26	0.0430	0.6398	0.7491	0.008819
1	1092078	1092131	RLOC_00000366	.	+	6.42	1.0356	0.02201	0.07148	0.008819
1	1092301	1092353	RLOC_00000366	.	+	8.21	0.5251	0.2044	0.3382	0.008819
1	1092353	1092421	RLOC_00000366	.	+	13.82	0.3964	0.1398	0.2584	0.008819
1	1092571	1092670	RLOC_00000366	.	+	13.22	0.3802	0.3211	0.4647	0.008819
1	1092775	1092988	RLOC_00000366	.	+	15.93	0.3359	0.3765	0.5193	0.008819
1	1093108	1093248	RLOC_00000366	.	+	15.80	0.3019	0.4835	0.619	0.008819
1	1093335	1093450	RLOC_00000366	.	+	19.16	-0.3119	0.3925	0.5347	0.008819
1	1093691	1093742	RLOC_00000366	.	+	14.62	-0.6619	0.1277	0.2425	0.008819
1	1093824	1093995	RLOC_00000366	.	+	16.65	-0.4215	0.1468	0.2675	0.008819
1	1094311	1094464	RLOC_00000366	.	+	22.73	-0.4602	0.09616	0.1986	0.008819
1	1094550	1094721	RLOC_00000366	.	+	17.64	-0.2331	0.8137	0.8784	0.008819
1	1094926	1095029	RLOC_00000366	.	+	11.94	-0.6354	0.1465	0.267	0.008819
1	1095106	1095177	RLOC_00000366	.	+	22.36	-0.8259	0.007717	0.03493	0.008819
1	1095346	1095443	RLOC_00000366	.	+	23.71	-0.6994	0.01625	0.05795	0.008819
1	1095517	1095576	RLOC_00000366	.	+	23.28	-0.6032	0.07572	0.1681	0.008819
1	1095664	1095721	RLOC_00000366	.	+	20.58	-0.4270	0.1338	0.2504	0.008819
1	1095803	1095967	RLOC_00000366	.	+	35.23	-0.7792	0.001732	0.01278	0.008819
1	1096034	1096304	RLOC_00000366	.	+	30.91	-0.8779	0.0002896	0.003796	0.008819
1	1096968	1097120	RLOC_00000367	.	+	111.03	0.3437	0.006565	0.03135	0.002587
1	1097395	1097532	RLOC_00000367	.	+	252.41	0.5754	0.0006396	0.006478	0.002587
1	1097616	1097680	RLOC_00000367	.	+	275.15	0.4215	0.0005283	0.005699	0.002587
1	1097797	1097913	RLOC_00000367	.	+	342.00	0.3970	0.0004031	0.004761	0.002587
1	1097998	1098102	RLOC_00000367	.	+	355.93	0.2673	0.02765	0.08352	0.002587
1	1098197	1098279	RLOC_00000367	.	+	4.07	1.0240	0.1026	0.2078	0.002587
1	1098377	1098606	RLOC_00000367	.	+	486.21	0.3110	0.02542	0.07881	0.002587
1	1098716	1098937	RLOC_00000367	.	+	552.11	-0.0407	0.7608	0.8403	0.002587
1	1099035	1099298	RLOC_00000367	.	+	712.89	-0.2806	5.652e-05	0.001196	0.002587
1	1099399	1099937	RLOC_00000367	.	+	1159.85	-0.7337	0.001006	0.008854	0.002587
1	1104523	1105288	RLOC_00000368	.	+	111.12	0.4234	0.001615	0.01217	0.03088
1	1105388	1106115	RLOC_00000368	.	+	123.00	-0.4249	0.001509	0.01163	0.03088
1	1106428	1106694	RLOC_00000369	.	-	244.33	-0.4418	0.1276	0.2424	0.2075
1	1106856	1106990	RLOC_00000369	.	-	241.25	-0.3075	0.01844	0.06323	0.2075
1	1107055	1107191	RLOC_00000369	.	-	204.08	0.0669	0.3323	0.476	0.2075
1	1107267	1107447	RLOC_00000369	.	-	220.52	0.1626	0.02207	0.07161	0.2075
1	1107555	1107729	RLOC_00000369	.	-	212.94	-0.0405	0.9309	0.9578	0.2075
1	1107819	1107872	RLOC_00000369	.	-	161.57	-0.0537	0.8545	0.9065	0.2075
1	1107983	1108078	RLOC_00000369	.	-	188.74	0.1215	0.1925	0.3243	0.2075
1	1108399	1108684	RLOC_00000369	.	-	191.97	0.2395	0.06028	0.1433	0.2075
1	1109499	1109865	RLOC_00000370	.	+	76.99	0.5506	0.0006721	0.006705	0.003634
1	1109983	1110223	RLOC_00000370	.	+	65.75	0.8512	8.901e-05	0.001658	0.003634
1	1110299	1110363	RLOC_00000370	.	+	41.16	1.0311	0.0004667	0.005258	0.003634
1	1110456	1110586	RLOC_00000370	.	+	53.68	0.7787	0.0001859	0.002792	0.003634
1	1110676	1110982	RLOC_00000370	.	+	63.30	0.2949	0.06791	0.1557	0.003634
1	1110982	1111228	RLOC_00000370	.	+	91.01	0.0889	0.3678	0.5108	0.003634
1	1111304	1111392	RLOC_00000370	.	+	65.71	-0.0334	0.9258	0.9544	0.003634
1	1111522	1111625	RLOC_00000370	.	+	60.06	-0.1551	0.3907	0.533	0.003634
1	1111790	1111919	RLOC_00000370	.	+	67.25	0.2641	0.2365	0.3743	0.003634
1	1112000	1112114	RLOC_00000370	.	+	74.43	0.0249	0.7093	0.8023	0.003634
1	1112290	1112409	RLOC_00000370	.	+	68.48	-0.2540	0.2403	0.3784	0.003634
1	1112499	1112590	RLOC_00000370	.	+	79.17	-0.2129	0.4126	0.5537	0.003634
1	1112687	1112781	RLOC_00000370	.	+	77.02	-0.1679	0.3208	0.4643	0.003634
1	1112860	1112950	RLOC_00000370	.	+	86.61	-0.0692	0.8445	0.8998	0.003634
1	1112950	1113071	RLOC_00000370	.	+	14.38	0.8185	0.1246	0.2383	0.003634
1	1113071	1113191	RLOC_00000370	.	+	114.91	-0.3717	0.01254	0.04859	0.003634
1	1113300	1113392	RLOC_00000370	.	+	113.19	-0.4849	0.000683	0.006776	0.003634
1	1113505	1114051	RLOC_00000370	.	+	149.80	-0.5792	0.001865	0.01343	0.003634
1	1114377	1115192	RLOC_00000371	.	+	254.72	0.4879	0.0006494	0.006547	0.01626
1	1115556	1115821	RLOC_00000371	.	+	143.20	0.7541	0.0009427	0.00846	0.01626
1	1115937	1116100	RLOC_00000371	.	+	127.66	0.2891	0.07698	0.17	0.01626
1	1116225	1116961	RLOC_00000371	.	+	379.65	0.2420	0.02854	0.08537	0.01626
1	1117051	1117482	RLOC_00000371	.	+	278.58	0.2499	0.03284	0.0942	0.01626
1	1117573	1117756	RLOC_00000371	.	+	179.81	-0.0339	0.7474	0.8306	0.01626
1	1117988	1118145	RLOC_00000371	.	+	182.86	-0.1966	0.07773	0.1712	0.01626
1	1118222	1118447	RLOC_00000371	.	+	217.50	-0.1555	0.1052	0.2115	0.01626
1	1118530	1118882	RLOC_00000371	.	+	307.14	-0.2021	0.05458	0.1338	0.01626
1	1118967	1119069	RLOC_00000371	.	+	133.67	-0.1721	0.156	0.2794	0.01626
1	1119152	1119702	RLOC_00000371	.	+	403.74	-0.6075	0.000964	0.008593	0.01626
1	1119747	1120694	RLOC_00000372	.	-	285.96	-0.4037	0.01575	0.05667	0.1564
1	1121186	1121446	RLOC_00000372	.	-	6.98	1.3393	0.01259	0.04871	0.1564
1	1121446	1121508	RLOC_00000372	.	-	4.11	0.9666	0.09367	0.195	0.1564
1	1121715	1122504	RLOC_00000372	.	-	140.33	0.0866	0.06977	0.1586	0.1564
1	1125557	1125728	RLOC_00000374	.	+	79.11	-0.1824	0.1982	0.3309	6.3e-11
1	1125994	1126124	RLOC_00000374	.	+	90.65	-0.0297	0.9569	0.9745	6.3e-11
1	1126232	1126363	RLOC_00000374	.	+	76.46	0.1736	0.2458	0.3844	6.3e-11
1	1126534	1126673	RLOC_00000374	.	+	97.30	-0.0979	0.5557	0.6812	6.3e-11
1	1126847	1126962	RLOC_00000374	.	+	100.16	-0.2260	0.0521	0.1296	6.3e-11
1	1127192	1127256	RLOC_00000374	.	+	87.81	-0.4777	0.001854	0.01338	6.3e-11
1	1127433	1127673	RLOC_00000374	.	+	133.05	-0.5138	6.303e-05	0.001292	6.3e-11
1	1127822	1128145	RLOC_00000374	.	+	90.22	-0.3642	0.05429	0.1333	6.3e-11
1	1128145	1128458	RLOC_00000374	.	+	12.56	1.7175	7.678e-05	0.001494	6.3e-11
1	1128458	1128639	RLOC_00000374	.	+	15.26	0.7602	0.2064	0.3405	6.3e-11
1	1128639	1128743	RLOC_00000374	.	+	10.59	2.4784	2.145e-06	9.198e-05	6.3e-11
1	1128743	1128889	RLOC_00000374	.	+	21.38	1.1663	0.00217	0.01487	6.3e-11
1	1128966	1129134	RLOC_00000374	.	+	30.97	0.8333	0.001	0.008821	6.3e-11
1	1129134	1129272	RLOC_00000374	.	+	34.16	0.6290	0.02464	0.07714	6.3e-11
1	1129272	1129576	RLOC_00000374	.	+	18.26	1.8386	1.353e-06	6.258e-05	6.3e-11
1	1129576	1129834	RLOC_00000374	.	+	10.16	3.5802	2.019e-13	3.011e-11	6.3e-11
1	1128184	1129443	RLOC_00000375	.	-	2264.42	-0.3392	0.1601	0.2846	0.7251
1	1129443	1129493	RLOC_00000375	.	-	12.60	0.4772	0.1483	0.2694	0.7251
1	1136273	1136621	RLOC_00000377	.	+	872.02	0.1656	0.06891	0.1573	0.4972
1	1136933	1137146	RLOC_00000377	.	+	1011.73	0.0036	0.833	0.8919	0.4972
1	1137458	1137598	RLOC_00000377	.	+	964.09	-0.0267	0.6078	0.7238	0.4972
1	1137739	1137863	RLOC_00000377	.	+	639.58	-0.0198	0.5103	0.6422	0.4972
1	1137944	1138009	RLOC_00000377	.	+	4.39	-0.2426	0.6398	0.7491	0.4972
1	1138301	1138578	RLOC_00000377	.	+	637.09	-0.0760	0.2232	0.3596	0.4972
1	1140598	1141356	RLOC_00000378	.	-	538.29	0.0556	0.4483	0.5871	0.5058
1	1141605	1142102	RLOC_00000378	.	-	5116.72	-0.0661	0.2584	0.3983	0.5058
1	1142102	1142575	RLOC_00000378	.	-	36.82	0.4601	0.07102	0.1607	0.5058
1	1142575	1142635	RLOC_00000378	.	-	2603.08	-0.0302	0.5088	0.6408	0.5058
1	1142718	1142870	RLOC_00000378	.	-	3480.92	0.0207	0.4966	0.6305	0.5058
1	1142956	1143039	RLOC_00000378	.	-	1852.86	0.0771	0.2766	0.4181	0.5058
1	1143470	1143536	RLOC_00000379	.	-	10.42	-0.3620	0.89	0.9308	0.0002866
1	1143536	1144125	RLOC_00000379	.	-	878.43	-0.9549	3.468e-06	0.0001365	0.0002866
1	1144232	1144557	RLOC_00000379	.	-	679.84	-0.6924	2.304e-05	0.0006148	0.0002866
1	1144652	1144784	RLOC_00000379	.	-	299.04	-0.2253	0.04169	0.111	0.0002866
1	1144873	1145096	RLOC_00000379	.	-	345.96	-0.2169	0.06139	0.1451	0.0002866
1	1145294	1145361	RLOC_00000379	.	-	182.68	-0.2785	0.0113	0.04528	0.0002866
1	1145495	1145720	RLOC_00000379	.	-	308.33	-0.1566	0.1263	0.2405	0.0002866
1	1146140	1146670	RLOC_00000379	.	-	269.27	0.1285	0.3065	0.4494	0.0002866
1	1147571	1147864	RLOC_00000379	.	-	260.19	-0.5537	0.01172	0.04644	0.0002866
1	1147947	1148092	RLOC_00000379	.	-	346.01	-0.7335	0.0002937	0.003834	0.0002866
1	1148092	1148172	RLOC_00000379	.	-	4.75	-1.9245	0.01977	0.0663	0.0002866
1	1148172	1148462	RLOC_00000379	.	-	406.85	-0.7987	0.00171	0.01267	0.0002866
1	1148631	1150884	RLOC_00000379	.	-	1638.00	0.4201	9.867e-05	0.001783	0.0002866
1	1150966	1151119	RLOC_00000379	.	-	276.75	0.1978	0.06756	0.1551	0.0002866
1	1151211	1151325	RLOC_00000379	.	-	241.34	0.3199	0.01068	0.04353	0.0002866
1	1151501	1152053	RLOC_00000379	.	-	338.71	0.8503	5.949e-05	0.001241	0.0002866
1	1152053	1152477	RLOC_00000379	.	-	237.36	1.0461	5.149e-05	0.001115	0.0002866
1	1152676	1152809	RLOC_00000379	.	-	162.75	1.0069	0.002002	0.0141	0.0002866
1	1152878	1152947	RLOC_00000379	.	-	87.32	0.9737	0.001072	0.009243	0.0002866
1	1152947	1153177	RLOC_00000379	.	-	79.21	1.0695	0.0003707	0.004507	0.0002866
1	1153229	1153345	RLOC_00000379	.	-	101.91	1.1422	0.000107	0.00189	0.0002866
1	1153716	1153940	RLOC_00000379	.	-	145.18	0.9953	0.0003013	0.003901	0.0002866
1	1154495	1154564	RLOC_00000379	.	-	52.53	0.5993	0.01761	0.06123	0.0002866
1	1154564	1154635	RLOC_00000379	.	-	8.84	1.1354	0.03671	0.1018	0.0002866
1	1154898	1155277	RLOC_00000379	.	-	73.98	-0.0648	0.709	0.802	0.0002866
1	1155349	1156417	RLOC_00000379	.	-	149.44	0.2976	0.00958	0.04047	0.0002866
1	1156417	1157140	RLOC_00000379	.	-	64.82	0.7115	0.004505	0.02426	0.0002866
1	1157545	1157757	RLOC_00000379	.	-	14.25	0.9970	0.003552	0.0207	0.0002866
1	1147922	1148072	RLOC_00000380	.	+	10.45	0.4303	0.1141	0.2239	0.5665
1	1148151	1148378	RLOC_00000380	.	+	20.98	-0.2730	0.08724	0.1855	0.5665
1	1163072	1163452	RLOC_00000383	.	-	212.75	-0.1778	0.7149	0.8063	0.01466
1	1163605	1163705	RLOC_00000383	.	-	185.35	-0.0840	0.669	0.7718	0.01466
1	1163790	1163881	RLOC_00000383	.	-	174.71	-0.0485	0.9865	0.9926	0.01466
1	1163971	1164086	RLOC_00000383	.	-	209.35	-0.0010	0.7468	0.8302	0.01466
1	1164327	1164387	RLOC_00000383	.	-	1.25	1.9770	0.04217	0.1119	0.01466
1	1164669	1164846	RLOC_00000383	.	-	179.87	-0.1626	0.4507	0.5892	0.01466
1	1165329	1165431	RLOC_00000383	.	-	9.46	0.1377	0.7074	0.801	0.01466
1	1165431	1165627	RLOC_00000383	.	-	10.87	0.8131	0.02657	0.08124	0.01466
1	1165627	1165735	RLOC_00000383	.	-	9.99	0.9098	0.03844	0.105	0.01466
1	1165735	1166003	RLOC_00000383	.	-	12.95	0.7561	0.03686	0.1021	0.01466
1	1166003	1166114	RLOC_00000383	.	-	7.00	1.5721	0.0005661	0.005969	0.01466
1	1165180	1166194	RLOC_00000384	.	+	2210.44	0.2455	0.006662	0.03165	0.0968
1	1166279	1166769	RLOC_00000384	.	+	1518.48	-0.2488	0.006749	0.03192	0.0968
1	1179379	1180110	RLOC_00000389	.	-	138.99	-0.7183	0.0006026	0.006221	0.01536
1	1180478	1180631	RLOC_00000389	.	-	58.72	-0.1893	0.5751	0.6976	0.01536
1	1180716	1181841	RLOC_00000389	.	-	186.17	0.0250	0.2607	0.4008	0.01536
1	1181937	1182380	RLOC_00000389	.	-	68.91	0.3196	0.05659	0.1372	0.01536
1	1182453	1182587	RLOC_00000389	.	-	29.21	0.0290	0.5557	0.6812	0.01536
1	1182690	1183198	RLOC_00000389	.	-	63.63	0.3725	0.02089	0.06889	0.01536
1	1183301	1183428	RLOC_00000389	.	-	30.55	0.1932	0.1813	0.311	0.01536
1	1183529	1183659	RLOC_00000389	.	-	22.25	0.2615	0.1425	0.2619	0.01536
1	1185559	1186339	RLOC_00000390	.	-	2961.81	-0.3837	0.0001703	0.002617	0.001323
1	1186401	1187485	RLOC_00000390	.	-	3549.82	-0.0308	0.04837	0.1231	0.001323
1	1187588	1188007	RLOC_00000390	.	-	1419.21	0.1955	2.322e-05	0.0006181	0.001323
1	1188007	1188073	RLOC_00000390	.	-	7.22	0.9887	0.02886	0.08601	0.001323
1	1188186	1188450	RLOC_00000390	.	-	371.87	0.1651	0.01527	0.05548	0.001323
1	1189035	1190309	RLOC_00000391	.	-	15065.89	-0.2306	0.06348	0.1486	0.119
1	1190388	1190660	RLOC_00000391	.	-	5554.85	0.0276	0.008784	0.03817	0.119
1	1190744	1190910	RLOC_00000391	.	-	4435.52	0.0382	0.1548	0.2778	0.119
1	1191223	1191410	RLOC_00000391	.	-	2950.70	0.0536	0.1853	0.3157	0.119
1	1191596	1191858	RLOC_00000392	.	+	817.06	0.3213	0.0005113	0.005575	0.01354
1	1191938	1192034	RLOC_00000392	.	+	751.12	0.2222	0.0009075	0.008248	0.01354
1	1192213	1192297	RLOC_00000392	.	+	663.94	0.1531	0.001121	0.009511	0.01354
1	1192410	1192580	RLOC_00000392	.	+	827.30	0.1260	0.003105	0.01895	0.01354
1	1192712	1192837	RLOC_00000392	.	+	845.69	0.0067	0.3168	0.4601	0.01354
1	1192922	1193060	RLOC_00000392	.	+	984.33	-0.2541	0.004481	0.02416	0.01354
1	1193140	1193329	RLOC_00000392	.	+	1313.20	-0.2541	0.01372	0.05158	0.01354
1	1193457	1193884	RLOC_00000392	.	+	1682.97	-0.3776	0.009268	0.03957	0.01354
1	1194195	1194277	RLOC_00000393	.	+	7.56	0.8664	0.1395	0.258	0.3997
1	1195100	1195551	RLOC_00000393	.	+	75.55	0.0843	0.3743	0.5172	0.3997
1	1195706	1195781	RLOC_00000393	.	+	2.74	0.6582	0.2871	0.4293	0.3997
1	1196636	1196896	RLOC_00000393	.	+	64.20	-0.2056	0.04786	0.1222	0.3997
1	1198124	1198326	RLOC_00000394	.	+	220.30	0.4602	0.001216	0.01004	0.01739
1	1198787	1199115	RLOC_00000394	.	+	506.85	0.2447	0.003249	0.01952	0.01739
1	1199196	1199363	RLOC_00000394	.	+	456.85	0.2755	0.0009886	0.008745	0.01739
1	1199456	1199641	RLOC_00000394	.	+	413.76	0.2963	0.01322	0.05033	0.01739
1	1199709	1200304	RLOC_00000394	.	+	1127.00	0.0164	0.225	0.3616	0.01739
1	1200406	1200537	RLOC_00000394	.	+	488.24	-0.1295	0.4747	0.6112	0.01739
1	1200537	1200641	RLOC_00000394	.	+	5.15	0.3946	0.3865	0.529	0.01739
1	1200641	1200874	RLOC_00000394	.	+	858.40	-0.2909	0.000709	0.006959	0.01739
1	1200960	1201513	RLOC_00000394	.	+	1115.20	-0.4551	0.009067	0.03898	0.01739
1	1202199	1202891	RLOC_00000395	.	+	316.81	0.3491	4.039e-06	0.0001548	0.0003252
1	1203103	1203173	RLOC_00000395	.	+	166.45	-0.0065	0.5144	0.6458	0.0003252
1	1203173	1203266	RLOC_00000395	.	+	5.27	0.1648	0.3384	0.4822	0.0003252
1	1203266	1203420	RLOC_00000395	.	+	225.20	0.0384	0.2331	0.3705	0.0003252
1	1203493	1203593	RLOC_00000395	.	+	243.96	0.1907	0.008801	0.03821	0.0003252
1	1203696	1203769	RLOC_00000395	.	+	244.63	0.0961	0.1517	0.2739	0.0003252
1	1203842	1204107	RLOC_00000395	.	+	389.81	-0.0030	0.3883	0.5307	0.0003252
1	1204107	1204181	RLOC_00000395	.	+	6.12	0.8661	0.07951	0.1738	0.0003252
1	1204181	1204268	RLOC_00000395	.	+	380.43	-0.1222	0.5244	0.6545	0.0003252
1	1204391	1204520	RLOC_00000395	.	+	428.69	0.0170	0.3015	0.4442	0.0003252
1	1204520	1204618	RLOC_00000395	.	+	15.80	0.7891	0.02239	0.07229	0.0003252
1	1204618	1205114	RLOC_00000395	.	+	622.32	-0.1461	0.3152	0.4585	0.0003252
1	1205114	1205861	RLOC_00000395	.	+	1072.39	-0.3197	0.0002713	0.003626	0.0003252
1	1216104	1216243	RLOC_00000401	.	+	733.56	0.0797	0.2435	0.3819	0.8594
1	1216243	1216528	RLOC_00000401	.	+	2575.45	-0.0248	0.7668	0.8449	0.8594
1	1216528	1217437	RLOC_00000401	.	+	1708.62	-0.0628	0.7796	0.854	0.8594
1	1218038	1218125	RLOC_00000405	.	-	4.57	0.4788	0.06283	0.1475	0.2457
1	1218307	1218414	RLOC_00000405	.	-	6.06	-0.8350	0.02334	0.07435	0.2457
1	1218646	1218727	RLOC_00000405	.	-	4.01	0.4766	0.3592	0.5027	0.2457
1	1226587	1226761	RLOC_00000407	.	+	136.30	0.5651	0.001005	0.008848	0.0227
1	1226851	1226937	RLOC_00000407	.	+	183.56	0.5372	0.001804	0.01313	0.0227
1	1227086	1227158	RLOC_00000407	.	+	154.26	0.5004	0.006891	0.03239	0.0227
1	1227246	1227309	RLOC_00000407	.	+	133.13	0.3238	0.06101	0.1445	0.0227
1	1227579	1227666	RLOC_00000407	.	+	156.26	0.0077	0.7563	0.8372	0.0227
1	1227814	1227957	RLOC_00000407	.	+	195.70	-0.0522	0.8175	0.881	0.0227
1	1228045	1228167	RLOC_00000407	.	+	188.49	0.1084	0.3619	0.5053	0.0227
1	1228330	1228447	RLOC_00000407	.	+	173.19	0.2487	0.07632	0.169	0.0227
1	1228705	1228801	RLOC_00000407	.	+	177.53	0.1590	0.3579	0.5015	0.0227
1	1228896	1228956	RLOC_00000407	.	+	183.75	-0.1350	0.3772	0.52	0.0227
1	1229052	1229128	RLOC_00000407	.	+	218.58	-0.1343	0.2558	0.3954	0.0227
1	1229232	1229337	RLOC_00000407	.	+	264.60	-0.0797	0.6166	0.7308	0.0227
1	1229503	1229624	RLOC_00000407	.	+	277.40	0.0568	0.5553	0.6809	0.0227
1	1229714	1229794	RLOC_00000407	.	+	272.55	-0.1206	0.2552	0.3947	0.0227
1	1229892	1229977	RLOC_00000407	.	+	279.83	-0.1730	0.1817	0.3115	0.0227
1	1230064	1230116	RLOC_00000407	.	+	231.64	-0.2565	0.09595	0.1983	0.0227
1	1230302	1230375	RLOC_00000407	.	+	256.44	-0.2860	0.06834	0.1564	0.0227
1	1230463	1230819	RLOC_00000407	.	+	367.16	-0.3376	0.0198	0.06637	0.0227
1	1231595	1232272	RLOC_00000408	.	+	102.41	0.5649	0.01262	0.0488	0.1567
1	1232604	1232991	RLOC_00000408	.	+	109.25	-0.0784	0.1719	0.2994	0.1567
1	1233492	1233600	RLOC_00000408	.	+	51.78	-0.1938	0.3422	0.486	0.1567
1	1233779	1233968	RLOC_00000408	.	+	39.05	-0.4542	0.2544	0.3939	0.1567
1	1234187	1234504	RLOC_00000409	.	-	650.34	-0.0833	0.3708	0.5137	0.1928
1	1234603	1234759	RLOC_00000409	.	-	764.90	-0.1556	0.01662	0.05885	0.1928
1	1234992	1235110	RLOC_00000409	.	-	638.69	-0.0532	0.05477	0.1341	0.1928
1	1235184	1235358	RLOC_00000409	.	-	720.60	0.0847	0.5313	0.6605	0.1928
1	1235454	1236080	RLOC_00000409	.	-	1163.53	0.2657	0.01671	0.05907	0.1928
1	1236838	1237687	RLOC_00000410	.	-	34.16	-0.4345	0.1899	0.3212	0.6664
1	1237758	1237862	RLOC_00000410	.	-	6.06	-0.4397	0.3455	0.4893	0.6664
1	1238314	1238503	RLOC_00000410	.	-	7.61	0.4941	0.2435	0.3819	0.6664
1	1238578	1238684	RLOC_00000410	.	-	9.35	0.1755	0.7036	0.798	0.6664
1	1238684	1238905	RLOC_00000410	.	-	8.79	0.5298	0.1221	0.2349	0.6664
1	1240390	1240784	RLOC_00000412	.	+	322.88	0.3244	0.01758	0.06117	0.2007
1	1241009	1241345	RLOC_00000412	.	+	438.29	0.1410	0.06879	0.1571	0.2007
1	1241421	1241677	RLOC_00000412	.	+	370.03	-0.2109	0.04521	0.1175	0.2007
1	1241758	1242133	RLOC_00000412	.	+	339.27	-0.2941	0.03796	0.1041	0.2007
1	1242606	1242896	RLOC_00000413	.	+	79.98	-0.0007	0.8727	0.9191	1
1	1243441	1243512	RLOC_00000413	.	+	71.12	0.0165	0.8731	0.9194	1
1	1243607	1243743	RLOC_00000413	.	+	105.40	-0.0316	0.7562	0.8372	1
1	1243850	1244137	RLOC_00000413	.	+	93.23	0.0578	0.6137	0.7286	1
1	1245023	1245199	RLOC_00000414	.	+	57.73	-0.1280	0.9054	0.9409	0.948
1	1245291	1245469	RLOC_00000414	.	+	72.46	0.1132	0.3734	0.5163	0.948
1	1245635	1245931	RLOC_00000414	.	+	77.66	-0.1193	0.4423	0.5816	0.948
1	1245931	1245998	RLOC_00000414	.	+	8.21	0.2788	0.4791	0.615	0.948
1	1246846	1247095	RLOC_00000415	.	-	14.00	-0.4740	0.1234	0.2368	0.1516
1	1247245	1247537	RLOC_00000415	.	-	15.01	-0.8339	0.1138	0.2234	0.1516
1	1247571	1248003	RLOC_00000415	.	-	17.58	0.4824	0.01206	0.04734	0.1516
1	1248116	1248342	RLOC_00000415	.	-	9.33	0.6385	0.1385	0.2567	0.1516
1	1252235	1252441	RLOC_00000416	.	-	13.92	19.3877	8.505e-29	3.687e-26	0
1	1252541	1252731	RLOC_00000416	.	-	12.76	19.2396	4.481e-29	1.97e-26	0
1	1253181	1254147	RLOC_00000416	.	-	31.69	8.7493	7.112e-57	8.516e-54	0
1	1254219	1254438	RLOC_00000416	.	-	9.29	18.7600	3.504e-15	5.986e-13	0
1	1254540	1254750	RLOC_00000416	.	-	8.28	18.5644	1.201e-15	2.145e-13	0
1	1254865	1255125	RLOC_00000416	.	-	8.11	18.5228	2.825e-16	5.349e-14	0
1	1255276	1255628	RLOC_00000416	.	-	7.06	18.3513	1.589e-17	3.415e-15	0
1	1255846	1256079	RLOC_00000416	.	-	7.12	18.4495	6.69e-17	1.352e-14	0
1	1256138	1256884	RLOC_00000416	.	-	14.41	19.3901	4.572e-30	2.098e-27	0
1	1257376	1257522	RLOC_00000416	.	-	4.62	17.7954	1.085e-11	1.345e-09	0
1	1258390	1258600	RLOC_00000416	.	-	9.59	0.5539	0.1599	0.2843	0
1	1258615	1258899	RLOC_00000416	.	-	163.80	-0.4605	1.57e-08	1.222e-06	0
1	1259026	1259221	RLOC_00000416	.	-	187.86	-0.3180	2.996e-09	2.701e-07	0
1	1259357	1259570	RLOC_00000416	.	-	160.38	-0.1369	5.979e-06	0.0002125	0
1	1259727	1259871	RLOC_00000416	.	-	100.56	-0.0130	0.0456	0.1182	0
1	1260011	1260125	RLOC_00000416	.	-	96.65	0.1620	0.3917	0.5339	0
1	1260524	1260626	RLOC_00000416	.	-	101.09	0.2884	0.9915	0.9955	0
[truncated: 123,929 more rows]
