# Supplementary material for: Widespread premature transcription termination of Arabidopsis thaliana NLR genes by the spen protein FPA
Source: eLife. 2021 Apr 27;10:e65537. doi: 10.7554/eLife.65537 (PMC8116057; doi:10.7554/eLife.65537)
Supplement: Figure 2—source data 7. [file elife-65537-fig2-data7.tds]

1	3683	3913	RLOC_00000001	.	+	23.71	0.5342	0.2069	0.3513	0.4392
1	3995	4276	RLOC_00000001	.	+	34.32	0.3052	0.1903	0.3318	0.4392
1	4485	4605	RLOC_00000001	.	+	23.45	0.3525	0.3141	0.4681	0.4392
1	4705	5095	RLOC_00000001	.	+	48.99	-0.0681	0.5711	0.7015	0.4392
1	5173	5326	RLOC_00000001	.	+	36.48	-0.3185	0.05581	0.1443	0.4392
1	5438	5731	RLOC_00000001	.	+	38.74	-0.2427	0.166	0.3022	0.4392
1	6816	7069	RLOC_00000002	.	-	158.70	-0.7712	0.001037	0.01114	0.004884
1	7133	7232	RLOC_00000002	.	-	134.03	-0.5030	0.002309	0.0182	0.004884
1	7364	7450	RLOC_00000002	.	-	105.06	-0.1810	0.1036	0.219	0.004884
1	7563	7649	RLOC_00000002	.	-	129.64	-0.2825	0.02738	0.0895	0.004884
1	7759	8464	RLOC_00000002	.	-	235.66	-0.0853	0.4353	0.5839	0.004884
1	8570	8695	RLOC_00000002	.	-	89.91	0.1041	0.7396	0.8307	0.004884
1	11670	12451	RLOC_00000002	.	-	118.87	0.7197	0.000128	0.003057	0.004884
1	12451	13173	RLOC_00000002	.	-	153.96	0.7277	0.0001036	0.002682	0.004884
1	13334	13415	RLOC_00000002	.	-	29.20	0.9977	0.0008969	0.01022	0.004884
1	13415	13591	RLOC_00000002	.	-	22.52	1.3263	0.0006624	0.00852	0.004884
1	23159	24024	RLOC_00000004	.	+	73.91	0.7339	0.0007436	0.00912	0.0005909
1	24024	24451	RLOC_00000004	.	+	56.54	0.7554	0.001471	0.01377	0.0005909
1	24541	24655	RLOC_00000004	.	+	27.82	0.1596	0.1554	0.2887	0.0005909
1	24751	24962	RLOC_00000004	.	+	34.10	0.3917	0.02821	0.09119	0.0005909
1	25040	25435	RLOC_00000004	.	+	55.15	1.0248	5.275e-06	0.0003665	0.0005909
1	25523	25743	RLOC_00000004	.	+	38.24	0.8584	0.0002266	0.00439	0.0005909
1	25824	25997	RLOC_00000004	.	+	34.97	0.1796	0.1263	0.2509	0.0005909
1	26080	26203	RLOC_00000004	.	+	37.53	0.3221	0.0525	0.1385	0.0005909
1	26291	26452	RLOC_00000004	.	+	33.49	1.0470	6.337e-05	0.001986	0.0005909
1	26542	26776	RLOC_00000004	.	+	58.73	0.0738	0.1794	0.3187	0.0005909
1	26861	27012	RLOC_00000004	.	+	65.15	-0.3743	0.7147	0.8122	0.0005909
1	27098	27281	RLOC_00000004	.	+	55.75	-0.0795	0.5045	0.6451	0.0005909
1	27371	27534	RLOC_00000004	.	+	32.04	0.6194	0.00889	0.04293	0.0005909
1	27617	27713	RLOC_00000004	.	+	37.46	0.3139	0.08279	0.1884	0.0005909
1	27802	28805	RLOC_00000004	.	+	166.38	0.2033	0.004968	0.02956	0.0005909
1	28888	29080	RLOC_00000004	.	+	92.53	-0.0243	0.3681	0.5211	0.0005909
1	29159	30065	RLOC_00000004	.	+	340.28	-0.1019	0.4318	0.5807	0.0005909
1	30146	30311	RLOC_00000004	.	+	178.27	-0.2440	0.5502	0.684	0.0005909
1	30409	30816	RLOC_00000004	.	+	381.27	-0.8972	3.379e-05	0.001314	0.0005909
1	30901	31173	RLOC_00000004	.	+	178.90	-1.3414	2.339e-05	0.00103	0.0005909
1	31187	31424	RLOC_00000006	.	-	509.67	-0.0614	0.6571	0.7693	0.1756
1	31519	31815	RLOC_00000006	.	-	816.62	-0.1886	0.01447	0.05897	0.1756
1	31931	32003	RLOC_00000006	.	-	466.05	-0.1153	0.1404	0.2695	0.1756
1	32086	32196	RLOC_00000006	.	-	465.49	0.1628	0.04935	0.1329	0.1756
1	32280	32348	RLOC_00000006	.	-	407.39	0.0946	0.1554	0.2888	0.1756
1	32545	32672	RLOC_00000006	.	-	459.22	0.0738	0.3317	0.4859	0.1756
1	33028	33115	RLOC_00000006	.	-	254.35	0.1413	0.2793	0.4322	0.1756
1	33115	33194	RLOC_00000006	.	-	28.05	0.3992	0.1327	0.2594	0.1756
1	33736	34329	RLOC_00000008	.	-	1103.91	-0.7422	0.004989	0.02965	0.0001416
1	34400	35474	RLOC_00000008	.	-	1521.81	-0.2119	0.573	0.703	0.0001416
1	35566	35648	RLOC_00000008	.	-	279.71	0.0004	0.2103	0.3553	0.0001416
1	35729	35964	RLOC_00000008	.	-	458.66	-0.0554	0.2473	0.3975	0.0001416
1	36623	36685	RLOC_00000008	.	-	249.57	0.0438	0.09765	0.2104	0.0001416
1	36809	36921	RLOC_00000008	.	-	251.62	0.3690	0.001003	0.01092	0.0001416
1	37022	37398	RLOC_00000008	.	-	220.49	0.6135	7.811e-07	8.793e-05	0.0001416
1	37568	37739	RLOC_00000008	.	-	85.27	0.3421	0.001916	0.01617	0.0001416
1	37739	37834	RLOC_00000008	.	-	4.80	1.8493	0.003181	0.02222	0.0001416
1	38820	39054	RLOC_00000009	.	-	55.44	-0.6148	0.02799	0.09072	0.2808
1	39135	39287	RLOC_00000009	.	-	57.27	-0.4001	0.08109	0.1857	0.2808
1	39408	39814	RLOC_00000009	.	-	77.44	0.1470	0.1686	0.3055	0.2808
1	40212	40329	RLOC_00000009	.	-	47.41	0.0648	0.5471	0.6814	0.2808
1	40472	40535	RLOC_00000009	.	-	44.96	0.1963	0.1591	0.2934	0.2808
1	40674	40904	RLOC_00000009	.	-	51.71	0.2351	0.1075	0.2245	0.2808
1	45297	46349	RLOC_00000011	.	-	1362.68	0.0221	0.00828	0.04102	4.548e-11
1	46349	46817	RLOC_00000011	.	-	673.94	0.4123	4.171e-14	2.88e-11	4.548e-11
1	47482	47997	RLOC_00000011	.	-	2923.06	-0.4912	0.0006716	0.008581	4.548e-11
1	48072	48853	RLOC_00000011	.	-	4284.24	-0.2066	0.4713	0.6161	4.548e-11
1	48935	49275	RLOC_00000011	.	-	1046.39	0.1652	0.004323	0.02701	4.548e-11
1	50071	50662	RLOC_00000012	.	-	6206.03	-0.1365	0.06227	0.1554	0.3089
1	50880	50965	RLOC_00000012	.	-	2697.81	0.0265	0.215	0.3607	0.3089
1	51063	51125	RLOC_00000012	.	-	14.75	-0.3353	0.3223	0.4762	0.3089
1	51125	51190	RLOC_00000012	.	-	1737.77	0.0920	0.03222	0.0997	0.3089
1	52174	52346	RLOC_00000013	.	+	14.82	0.5630	0.09409	0.2051	0.5885
1	52433	52730	RLOC_00000013	.	+	33.29	0.0747	0.5721	0.7023	0.5885
1	52937	53183	RLOC_00000013	.	+	40.62	0.3305	0.1262	0.2507	0.5885
1	53483	53624	RLOC_00000013	.	+	34.58	-0.2044	0.4237	0.5732	0.5885
1	53702	54638	RLOC_00000013	.	+	112.74	-0.2174	0.132	0.2584	0.5885
1	63303	63912	RLOC_00000015	.	-	96.83	-1.1846	0.001412	0.01343	0.01106
1	64166	64477	RLOC_00000015	.	-	470.02	-0.4886	0.01626	0.06366	0.01106
1	64581	64658	RLOC_00000015	.	-	430.87	-0.3107	0.1571	0.2909	0.01106
1	64748	65018	RLOC_00000015	.	-	725.19	-0.2067	0.1595	0.294	0.01106
1	65109	65219	RLOC_00000015	.	-	611.89	-0.1865	0.06778	0.1645	0.01106
1	65329	65456	RLOC_00000015	.	-	607.86	-0.0207	0.6596	0.7712	0.01106
1	65562	65652	RLOC_00000015	.	-	507.47	0.1032	0.1473	0.2785	0.01106
1	65735	65866	RLOC_00000015	.	-	516.07	0.0533	0.2842	0.4374	0.01106
1	66084	66161	RLOC_00000015	.	-	387.77	0.0201	0.5444	0.6792	0.01106
1	66260	66342	RLOC_00000015	.	-	435.31	-0.0160	0.6781	0.7851	0.01106
1	66449	66557	RLOC_00000015	.	-	543.88	0.0398	0.2571	0.4085	0.01106
1	66676	66751	RLOC_00000015	.	-	408.58	0.2076	0.001903	0.0161	0.01106
1	66834	66899	RLOC_00000015	.	-	401.09	0.2483	0.0003316	0.005516	0.01106
1	67320	67616	RLOC_00000015	.	-	600.24	0.1993	0.02102	0.07525	0.01106
1	72349	73174	RLOC_00000017	.	+	562.05	0.2285	0.1166	0.2375	0.6528
1	73263	73425	RLOC_00000017	.	+	360.81	0.0366	0.8188	0.8856	0.6528
1	73485	73740	RLOC_00000017	.	+	569.51	-0.0222	0.7094	0.8083	0.6528
1	73820	74250	RLOC_00000017	.	+	429.42	-0.2844	0.1645	0.3003	0.6528
1	73834	74281	RLOC_00000019	.	-	2374.20	-0.1661	0.02944	0.09389	0.2907
1	74336	74733	RLOC_00000019	.	-	1504.40	0.1706	0.02993	0.09488	0.2907
1	82926	83671	RLOC_00000023	.	-	82.72	-0.2392	0.04038	0.116	0.3591
1	83903	84928	RLOC_00000023	.	-	76.92	0.2464	0.04124	0.1176	0.3591
1	88912	89082	RLOC_00000025	.	+	188.99	-0.1386	0.01804	0.06806	2.263e-10
1	89167	89263	RLOC_00000025	.	+	207.96	-0.1307	0.01064	0.04813	2.263e-10
1	89404	89930	RLOC_00000025	.	+	268.79	-0.1523	0.002861	0.02082	2.263e-10
1	89930	90613	RLOC_00000025	.	+	116.21	1.1774	2.287e-13	1.43e-10	2.263e-10
1	91418	91633	RLOC_00000027	.	+	21.77	0.9787	2.635e-05	0.001114	0.001876
1	91740	92070	RLOC_00000027	.	+	53.68	0.5415	0.00684	0.03622	0.001876
1	92269	92501	RLOC_00000027	.	+	48.99	0.4803	0.004221	0.02662	0.001876
1	92567	92933	RLOC_00000027	.	+	71.93	0.3031	0.02191	0.07733	0.001876
1	93044	93171	RLOC_00000027	.	+	42.73	-0.1333	0.9446	0.9667	0.001876
1	93270	94281	RLOC_00000027	.	+	212.71	-0.0186	0.1917	0.3335	0.001876
1	94356	95075	RLOC_00000027	.	+	238.02	-0.1786	0.5867	0.7141	0.001876
1	95159	95658	RLOC_00000027	.	+	173.55	-0.9702	0.0003093	0.005297	0.001876
1	96028	96157	RLOC_00000029	.	+	20.81	0.3317	0.3113	0.4653	0.4047
1	96157	96231	RLOC_00000029	.	+	2.01	0.9874	0.2252	0.3725	0.4047
1	96553	97350	RLOC_00000029	.	+	72.75	0.0268	0.8976	0.9374	0.4047
1	97461	97807	RLOC_00000029	.	+	535.95	0.1071	0.04864	0.1316	0.4047
1	98456	98608	RLOC_00000029	.	+	508.84	-0.0562	0.3717	0.5245	0.4047
1	98907	99237	RLOC_00000029	.	+	464.96	-0.1289	0.2019	0.3454	0.4047
1	114297	114433	RLOC_00000035	.	+	74.84	0.2020	0.09651	0.2087	1.633e-05
1	114618	115339	RLOC_00000035	.	+	443.96	-0.0367	0.2384	0.3874	1.633e-05
1	115339	115886	RLOC_00000035	.	+	66.96	0.8715	1.783e-06	0.0001649	1.633e-05
1	115960	116231	RLOC_00000035	.	+	101.27	-1.6372	5.569e-08	1.017e-05	1.633e-05
1	121096	121408	RLOC_00000038	.	-	1116.59	-1.1147	0.001489	0.01388	0.0003411
1	121490	123517	RLOC_00000038	.	-	6450.05	-0.6529	2.461e-06	0.0002097	0.0003411
1	123578	123671	RLOC_00000038	.	-	675.22	-0.2288	0.2874	0.4407	0.0003411
1	123784	123899	RLOC_00000038	.	-	562.83	-0.2506	0.415	0.5652	0.0003411
1	123990	124126	RLOC_00000038	.	-	601.49	-0.0954	0.04131	0.1178	0.0003411
1	124210	124394	RLOC_00000038	.	-	501.02	0.0616	0.001639	0.01473	0.0003411
1	124497	124632	RLOC_00000038	.	-	418.25	0.1705	5.415e-05	0.001791	0.0003411
1	124712	124820	RLOC_00000038	.	-	416.50	0.1127	0.0002237	0.004356	0.0003411
1	124919	125024	RLOC_00000038	.	-	481.57	0.2086	0.0005298	0.007397	0.0003411
1	125133	125227	RLOC_00000038	.	-	501.17	0.0517	0.001689	0.015	0.0003411
1	125327	125655	RLOC_00000038	.	-	726.90	0.0710	0.002621	0.01971	0.0003411
1	125739	125844	RLOC_00000038	.	-	352.41	0.1742	0.005872	0.03291	0.0003411
1	125933	126000	RLOC_00000038	.	-	294.15	0.1509	0.0007283	0.00901	0.0003411
1	126075	126590	RLOC_00000038	.	-	884.76	0.0932	0.0007611	0.009253	0.0003411
1	126685	126840	RLOC_00000038	.	-	331.95	0.1541	0.0004314	0.006525	0.0003411
1	126933	127453	RLOC_00000038	.	-	697.13	0.2218	0.0002682	0.004852	0.0003411
1	127650	127782	RLOC_00000038	.	-	253.03	0.3510	9.232e-06	0.0005472	0.0003411
1	127867	127952	RLOC_00000038	.	-	258.71	0.4701	1.552e-05	0.0007815	0.0003411
1	128027	128314	RLOC_00000038	.	-	505.14	0.1987	0.001239	0.01239	0.0003411
1	128478	128553	RLOC_00000038	.	-	277.94	0.1921	0.0009867	0.01082	0.0003411
1	128967	129062	RLOC_00000038	.	-	332.83	0.0418	0.01641	0.06403	0.0003411
1	129851	129915	RLOC_00000038	.	-	298.01	-0.1416	0.4702	0.6152	0.0003411
1	130038	130197	RLOC_00000038	.	-	301.48	-0.0035	0.142	0.2715	0.0003411
1	130361	130562	RLOC_00000038	.	-	166.62	0.7655	3.213e-05	0.001274	0.0003411
1	132455	132538	RLOC_00000041	.	-	8.42	-0.0280	0.8471	0.9042	0.9447
1	132590	132687	RLOC_00000041	.	-	8.95	-0.1964	0.8041	0.8758	0.9447
1	132986	133082	RLOC_00000041	.	-	6.66	-0.0895	0.5691	0.6999	0.9447
1	133349	133427	RLOC_00000041	.	-	3.78	0.3702	0.3739	0.5265	0.9447
1	133650	133703	RLOC_00000041	.	-	6.54	0.2077	0.4028	0.5539	0.9447
1	136167	136234	RLOC_00000042	.	+	21.49	0.2651	0.3993	0.5506	0.01987
1	136666	136816	RLOC_00000042	.	+	69.82	0.3873	0.06167	0.1544	0.01987
1	136934	137758	RLOC_00000042	.	+	543.52	0.1125	0.0231	0.07998	0.01987
1	137845	138122	RLOC_00000042	.	+	202.17	-0.5355	0.0007481	0.009158	0.01987
1	142019	142281	RLOC_00000044	.	+	165.19	0.0764	0.42	0.5698	0.8034
1	142423	142639	RLOC_00000044	.	+	261.00	0.0479	0.3893	0.5412	0.8034
1	142708	143103	RLOC_00000044	.	+	273.35	-0.2455	0.2454	0.3953	0.8034
1	143103	143177	RLOC_00000044	.	+	17.23	0.3092	0.1963	0.3389	0.8034
1	143752	143824	RLOC_00000045	.	+	16.65	-0.2633	0.6883	0.7926	0.8705
1	144446	144559	RLOC_00000045	.	+	45.36	0.2232	0.2543	0.4054	0.8705
1	144926	145004	RLOC_00000045	.	+	48.26	-0.0769	0.6147	0.7368	0.8705
1	145131	145207	RLOC_00000045	.	+	41.41	-0.1170	0.838	0.8981	0.8705
1	145344	145591	RLOC_00000045	.	+	51.39	-0.0288	0.6059	0.7298	0.8705
1	147224	147333	RLOC_00000046	.	+	21.32	0.0374	0.9161	0.9493	0.9444
1	147451	147539	RLOC_00000046	.	+	25.29	-0.0695	0.5177	0.6566	0.9444
1	147643	147748	RLOC_00000046	.	+	24.75	0.0203	0.991	0.9948	0.9444
1	147748	147836	RLOC_00000046	.	+	8.45	0.1305	0.3733	0.5259	0.9444
1	148210	149139	RLOC_00000047	.	-	81.80	-0.0631	0.7476	0.8367	1
1	149139	149778	RLOC_00000047	.	-	40.50	0.0873	0.766	0.8495	1
1	156643	158253	RLOC_00000051	.	-	4103.67	-0.3565	0.0001893	0.003917	0.00745
1	158253	158666	RLOC_00000051	.	-	970.01	0.3722	0.0002124	0.004211	0.00745
1	159680	159992	RLOC_00000052	.	-	120.86	-0.3972	0.02688	0.08844	0.2585
1	160078	160417	RLOC_00000052	.	-	185.29	-0.2656	0.02484	0.08396	0.2585
1	160417	160479	RLOC_00000052	.	-	121.57	0.0163	0.7952	0.8695	0.2585
1	160567	162280	RLOC_00000052	.	-	613.71	0.2464	0.03763	0.1106	0.2585
1	162486	162738	RLOC_00000052	.	-	66.54	0.4336	0.0918	0.2019	0.2585
1	163420	163516	RLOC_00000053	.	+	37.06	0.0712	0.1748	0.3131	0.0282
1	163933	164135	RLOC_00000053	.	+	62.02	0.2610	0.02225	0.07805	0.0282
1	164224	164686	RLOC_00000053	.	+	139.75	0.1818	0.003699	0.02445	0.0282
1	164770	166290	RLOC_00000053	.	+	414.65	-0.4137	0.00123	0.01236	0.0282
1	172138	172619	RLOC_00000057	.	-	2015.20	-0.0667	0.2084	0.353	0.8191
1	172619	172933	RLOC_00000057	.	-	1716.75	0.0678	0.209	0.3536	0.8191
1	172313	172544	RLOC_00000058	.	+	15.19	0.2452	0.2052	0.3494	0.8148
1	172622	172787	RLOC_00000058	.	+	8.34	-0.3639	0.2452	0.3951	0.8148
1	180083	181483	RLOC_00000060	.	-	3009.98	-0.3569	1.876e-05	0.0008892	0.001273
1	181507	181929	RLOC_00000060	.	-	38.69	0.4649	0.09574	0.2076	0.001273
1	181953	182387	RLOC_00000060	.	-	531.58	0.3185	1.51e-05	0.0007675	0.001273
1	185142	186009	RLOC_00000061	.	+	539.36	-0.0022	0.724	0.819	1
1	186337	186944	RLOC_00000061	.	+	336.97	0.0024	0.7273	0.8216	1
1	187198	187823	RLOC_00000062	.	+	431.35	0.2117	0.1929	0.3347	0.25
1	188010	188177	RLOC_00000062	.	+	204.21	0.4727	0.02369	0.08137	0.25
1	188283	188414	RLOC_00000062	.	+	127.84	0.2984	0.1297	0.2554	0.25
1	188527	189321	RLOC_00000062	.	+	716.77	0.1263	0.1525	0.2851	0.25
1	189561	189675	RLOC_00000062	.	+	308.74	-0.1853	0.3974	0.5489	0.25
1	189764	190166	RLOC_00000062	.	+	364.53	-0.2652	0.327	0.481	0.25
1	190549	190828	RLOC_00000062	.	+	144.55	-0.0856	0.3401	0.494	0.25
1	190940	190998	RLOC_00000062	.	+	105.48	-0.0999	0.3303	0.4844	0.25
1	191137	191258	RLOC_00000062	.	+	121.99	-0.0145	0.5315	0.6687	0.25
1	191340	191475	RLOC_00000062	.	+	110.79	0.0440	0.7166	0.8136	0.25
1	191578	191692	RLOC_00000062	.	+	102.18	-0.2700	0.1926	0.3344	0.25
1	191778	191890	RLOC_00000062	.	+	125.16	-0.7321	0.1675	0.3041	0.25
1	191966	192428	RLOC_00000062	.	+	176.55	-0.4038	0.2981	0.4518	0.25
1	195765	196543	RLOC_00000064	.	+	1045.46	0.1317	0.05225	0.1381	0.2147
1	197114	197220	RLOC_00000064	.	+	469.45	-0.0477	0.8427	0.9012	0.2147
1	197294	197422	RLOC_00000064	.	+	447.82	0.0163	0.3901	0.542	0.2147
1	197499	197674	RLOC_00000064	.	+	517.65	0.0615	0.09284	0.2033	0.2147
1	197774	198681	RLOC_00000064	.	+	1272.52	-0.2567	0.01908	0.07051	0.2147
1	199656	200282	RLOC_00000065	.	+	834.13	0.2611	0.0001179	0.002901	0.004641
1	200282	201755	RLOC_00000065	.	+	5072.23	-0.2339	9.598e-05	0.002558	0.004641
1	205010	205700	RLOC_00000067	.	+	34.10	0.8299	0.03387	0.1031	0.04056
1	205700	205949	RLOC_00000067	.	+	21.05	0.5198	0.1912	0.3328	0.04056
1	206691	206903	RLOC_00000067	.	+	19.77	0.0981	0.9434	0.9659	0.04056
1	206986	207193	RLOC_00000067	.	+	25.13	-0.5466	0.002033	0.01679	0.04056
1	207193	207243	RLOC_00000067	.	+	12.26	-0.3970	0.7541	0.8413	0.04056
1	207324	207412	RLOC_00000067	.	+	12.54	-0.6932	0.1941	0.3363	0.04056
1	209469	209549	RLOC_00000068	.	+	5.03	1.3053	0.008281	0.04102	0.1149
1	210001	210144	RLOC_00000068	.	+	10.71	0.2828	0.5843	0.7123	0.1149
1	210429	210564	RLOC_00000068	.	+	8.76	0.4967	0.2729	0.4256	0.1149
1	211280	211371	RLOC_00000068	.	+	11.56	-0.0542	0.8818	0.9267	0.1149
1	211485	211642	RLOC_00000068	.	+	13.49	-0.0456	0.8041	0.8758	0.1149
1	211968	212125	RLOC_00000068	.	+	12.21	0.3525	0.4975	0.6391	0.1149
1	212298	212466	RLOC_00000068	.	+	15.42	-0.2673	0.4464	0.5939	0.1149
1	212730	213026	RLOC_00000068	.	+	19.84	-0.8974	0.008184	0.0407	0.1149
1	219158	219621	RLOC_00000070	.	+	35.93	0.0702	0.6104	0.7333	1
1	219751	221147	RLOC_00000070	.	+	109.45	-0.0460	0.6125	0.735	1
1	221731	222361	RLOC_00000071	.	-	1292.79	-0.5683	0.002589	0.01954	0.0178
1	222614	223215	RLOC_00000071	.	-	1327.14	-0.0666	0.3736	0.5263	0.0178
1	223496	223867	RLOC_00000071	.	-	799.57	0.1953	0.0006452	0.008377	0.0178
1	223944	224341	RLOC_00000071	.	-	599.46	0.1704	0.01116	0.04969	0.0178
1	229028	229343	RLOC_00000073	.	+	414.00	0.2170	0.05164	0.137	0.419
1	229427	229724	RLOC_00000073	.	+	801.15	0.0013	0.8893	0.9319	0.419
1	229826	229954	RLOC_00000073	.	+	533.36	-0.0480	0.3961	0.5476	0.419
1	230296	230459	RLOC_00000073	.	+	577.52	-0.0287	0.5407	0.6761	0.419
1	230556	230843	RLOC_00000073	.	+	428.77	-0.0545	0.7127	0.8107	0.419
1	231027	231655	RLOC_00000074	.	-	88.66	-0.2200	0.06618	0.1619	0.4872
1	231783	231928	RLOC_00000074	.	-	36.22	0.1373	0.2628	0.4147	0.4872
1	232397	232472	RLOC_00000074	.	-	18.27	0.3637	0.1706	0.308	0.4872
1	232993	233297	RLOC_00000075	.	-	176.51	-0.2135	0.06739	0.1639	6.442e-05
1	233385	233470	RLOC_00000075	.	-	182.39	-0.3770	4.071e-05	0.001486	6.442e-05
1	233547	233760	RLOC_00000075	.	-	191.85	-0.3790	2.082e-05	0.000956	6.442e-05
1	233786	234083	RLOC_00000075	.	-	10.28	-1.6319	0.002807	0.02058	6.442e-05
1	234248	234623	RLOC_00000075	.	-	286.48	-0.1831	0.01618	0.06345	6.442e-05
1	234934	234988	RLOC_00000075	.	-	136.11	-0.0042	0.7838	0.8621	6.442e-05
1	235196	235360	RLOC_00000075	.	-	165.52	0.0513	0.8987	0.938	6.442e-05
1	235844	236027	RLOC_00000075	.	-	131.45	0.1682	0.2265	0.374	6.442e-05
1	236144	236296	RLOC_00000075	.	-	105.72	0.5164	0.0001071	0.002736	6.442e-05
1	236428	236548	RLOC_00000075	.	-	86.68	0.7306	2.913e-07	3.999e-05	6.442e-05
1	236672	236784	RLOC_00000075	.	-	80.10	0.8092	0.002249	0.0179	6.442e-05
1	236864	237023	RLOC_00000075	.	-	134.68	0.4859	0.01594	0.06287	6.442e-05
1	237503	237756	RLOC_00000075	.	-	118.68	0.2092	0.2854	0.4387	6.442e-05
1	240072	240211	RLOC_00000076	.	-	3.80	-0.5324	0.5788	0.7076	0.01449
1	240807	240871	RLOC_00000076	.	-	5.04	-1.0818	0.2275	0.3751	0.01449
1	240964	241031	RLOC_00000076	.	-	4.98	-0.4052	0.6436	0.7593	0.01449
1	241031	241118	RLOC_00000076	.	-	4.59	0.6506	0.1934	0.3354	0.01449
1	242857	242972	RLOC_00000076	.	-	6.25	1.2349	0.03134	0.09787	0.01449
1	242972	243128	RLOC_00000076	.	-	11.70	0.1057	0.8495	0.9055	0.01449
1	243335	243746	RLOC_00000076	.	-	22.55	-0.8468	0.0004814	0.006966	0.01449
1	244034	244182	RLOC_00000076	.	-	7.35	0.3157	0.4349	0.5835	0.01449
1	244256	244361	RLOC_00000076	.	-	5.57	1.4830	0.007321	0.03783	0.01449
1	244504	244620	RLOC_00000076	.	-	5.83	1.0938	0.02699	0.08868	0.01449
1	249125	249306	RLOC_00000078	.	+	14.77	0.9386	0.02987	0.09476	0.2937
1	249542	249693	RLOC_00000078	.	+	20.96	0.5324	0.1675	0.3041	0.2937
1	249773	249930	RLOC_00000078	.	+	16.46	0.3517	0.3042	0.458	0.2937
1	250013	250151	RLOC_00000078	.	+	24.87	0.4377	0.143	0.2729	0.2937
1	250535	250588	RLOC_00000078	.	+	23.12	0.5409	0.03289	0.1011	0.2937
1	250668	250863	RLOC_00000078	.	+	37.56	0.3995	0.1042	0.22	0.2937
1	251003	251066	RLOC_00000078	.	+	23.47	-0.3691	0.1246	0.2485	0.2937
1	251259	251316	RLOC_00000078	.	+	26.93	-0.2991	0.2313	0.3796	0.2937
1	251538	251594	RLOC_00000078	.	+	26.19	-0.2985	0.2123	0.3576	0.2937
1	251679	251827	RLOC_00000078	.	+	38.30	-0.4620	0.07563	0.1772	0.2937
1	251921	252006	RLOC_00000078	.	+	30.39	-0.3753	0.2338	0.3824	0.2937
1	252120	252393	RLOC_00000078	.	+	31.68	-0.3224	0.2385	0.3875	0.2937
1	258834	259205	RLOC_00000081	.	+	34.00	-0.1586	0.6557	0.7683	4.161e-05
1	262867	262965	RLOC_00000081	.	+	79.84	0.4793	0.02772	0.0902	4.161e-05
1	263046	263231	RLOC_00000081	.	+	114.47	0.3800	0.03713	0.1096	4.161e-05
1	263231	263300	RLOC_00000081	.	+	140.27	0.4440	0.0006406	0.008335	4.161e-05
1	263368	263643	RLOC_00000081	.	+	181.20	0.4042	0.0002209	0.004322	4.161e-05
1	263643	263770	RLOC_00000081	.	+	178.75	0.3235	0.00793	0.03982	4.161e-05
1	263856	263934	RLOC_00000081	.	+	151.66	0.3962	0.01391	0.05745	4.161e-05
1	264071	264160	RLOC_00000081	.	+	163.04	0.3336	0.01731	0.06631	4.161e-05
1	264279	264392	RLOC_00000081	.	+	188.20	0.2149	0.03119	0.0976	4.161e-05
1	264519	264582	RLOC_00000081	.	+	165.49	0.1494	0.2098	0.3546	4.161e-05
1	264656	264712	RLOC_00000081	.	+	153.83	0.0741	0.4534	0.6001	4.161e-05
1	264796	264901	RLOC_00000081	.	+	192.71	-0.0988	0.4144	0.5646	4.161e-05
1	265019	265105	RLOC_00000081	.	+	186.35	-0.2137	0.08098	0.1856	4.161e-05
1	265334	265626	RLOC_00000081	.	+	310.04	-0.3875	2.093e-05	0.0009584	4.161e-05
1	265776	265845	RLOC_00000081	.	+	217.38	-0.5204	9.829e-05	0.002596	4.161e-05
1	265943	266215	RLOC_00000081	.	+	268.23	-0.5205	0.01624	0.06361	4.161e-05
1	266435	266724	RLOC_00000081	.	+	40.13	-0.4632	0.08584	0.193	4.161e-05
1	266828	267008	RLOC_00000081	.	+	11.67	0.1022	0.7326	0.8255	4.161e-05
1	267008	267063	RLOC_00000081	.	+	7.76	0.0327	0.9067	0.9434	4.161e-05
1	267281	267798	RLOC_00000081	.	+	77.06	-1.0330	1.661e-07	2.555e-05	4.161e-05
1	259736	260034	RLOC_00000082	.	-	11.03	-0.7902	0.02457	0.08336	0.2566
1	260117	260417	RLOC_00000082	.	-	12.11	-0.4115	0.3556	0.5092	0.2566
1	260507	260582	RLOC_00000082	.	-	5.46	0.5514	0.2538	0.4047	0.2566
1	260677	260824	RLOC_00000082	.	-	10.55	0.5350	0.1634	0.2989	0.2566
1	260920	261037	RLOC_00000082	.	-	8.72	0.8085	0.2415	0.391	0.2566
1	269781	270351	RLOC_00000085	.	-	288.74	-0.2756	0.05488	0.1427	0.4347
1	270621	270765	RLOC_00000085	.	-	207.93	-0.1774	0.3602	0.5136	0.4347
1	271886	272362	RLOC_00000085	.	-	76.69	-0.1596	0.6591	0.7709	0.4347
1	272444	272555	RLOC_00000085	.	-	45.34	0.1041	0.4336	0.5823	0.4347
1	272650	272983	RLOC_00000085	.	-	71.70	0.0594	0.5206	0.6592	0.4347
1	273063	273149	RLOC_00000085	.	-	24.30	0.1246	0.6994	0.8012	0.4347
1	273149	273232	RLOC_00000085	.	-	6.89	-0.0305	0.7821	0.861	0.4347
1	273232	273339	RLOC_00000085	.	-	25.48	0.1128	0.7683	0.8512	0.4347
1	273428	273562	RLOC_00000085	.	-	27.03	0.2918	0.332	0.4863	0.4347
1	273652	273788	RLOC_00000085	.	-	30.60	0.3024	0.249	0.3994	0.4347
1	273862	274083	RLOC_00000085	.	-	39.83	0.4688	0.05665	0.1458	0.4347
1	274166	274289	RLOC_00000085	.	-	29.34	0.3384	0.1079	0.225	0.4347
1	274383	274700	RLOC_00000085	.	-	36.03	0.1941	0.3653	0.5185	0.4347
1	274700	274776	RLOC_00000085	.	-	4.92	0.4461	0.4165	0.5665	0.4347
1	270957	271290	RLOC_00000086	.	+	347.28	0.1195	0.08843	0.1968	0.558
1	271377	272009	RLOC_00000086	.	+	529.78	-0.1061	0.08479	0.1914	0.558
1	275700	275897	RLOC_00000087	.	+	18.13	-0.1003	0.2581	0.4096	0.8738
1	276093	276158	RLOC_00000087	.	+	12.23	0.1200	0.2611	0.4129	0.8738
1	275647	275977	RLOC_00000088	.	-	38.61	-0.7563	0.00164	0.01474	0.03465
1	276111	276167	RLOC_00000088	.	-	5.88	-0.6499	0.507	0.6473	0.03465
1	276173	276317	RLOC_00000088	.	-	23.20	-0.3986	0.1688	0.3057	0.03465
1	276404	276519	RLOC_00000088	.	-	25.43	0.3442	0.2698	0.4224	0.03465
1	276622	276793	RLOC_00000088	.	-	29.34	0.3833	0.167	0.3035	0.03465
1	276869	276989	RLOC_00000088	.	-	30.62	0.0893	0.5009	0.6418	0.03465
1	277076	277153	RLOC_00000088	.	-	30.37	0.0517	0.5389	0.6748	0.03465
1	277231	277401	RLOC_00000088	.	-	44.84	0.1229	0.3725	0.5253	0.03465
1	277492	277606	RLOC_00000088	.	-	35.85	-0.0447	0.7178	0.8145	0.03465
1	277716	277863	RLOC_00000088	.	-	31.93	-0.0304	0.8525	0.9075	0.03465
1	277946	278252	RLOC_00000088	.	-	40.99	0.2729	0.1466	0.2776	0.03465
1	278315	278438	RLOC_00000088	.	-	19.36	0.0029	0.8407	0.8999	0.03465
1	278518	278624	RLOC_00000090	.	+	5.98	1.3913	0.006516	0.03511	0.01498
1	278624	278809	RLOC_00000090	.	+	82.14	0.4043	0.0273	0.08937	0.01498
1	278886	279088	RLOC_00000090	.	+	118.25	0.2637	0.04881	0.1319	0.01498
1	279165	279240	RLOC_00000090	.	+	70.33	0.4068	0.03222	0.09968	0.01498
1	279326	279425	RLOC_00000090	.	+	77.90	0.1935	0.1364	0.2643	0.01498
1	279796	280088	RLOC_00000090	.	+	129.76	0.3167	0.02817	0.09112	0.01498
1	280179	280370	RLOC_00000090	.	+	105.04	0.3137	0.08167	0.1867	0.01498
1	280448	280568	RLOC_00000090	.	+	81.93	0.1729	0.2135	0.359	0.01498
1	280656	281121	RLOC_00000090	.	+	204.17	0.2259	0.01048	0.04766	0.01498
1	281437	281536	RLOC_00000090	.	+	147.80	0.3244	0.014	0.05768	0.01498
1	281758	282301	RLOC_00000090	.	+	273.16	0.0372	0.261	0.4129	0.01498
1	282483	283056	RLOC_00000090	.	+	338.49	-0.6102	0.009087	0.04351	0.01498
1	283056	283129	RLOC_00000090	.	+	8.11	-0.0858	0.9695	0.9819	0.01498
1	283129	283232	RLOC_00000090	.	+	204.93	-0.1876	0.4004	0.5516	0.01498
1	283361	283443	RLOC_00000090	.	+	3.60	0.3594	0.485	0.6282	0.01498
1	283443	283533	RLOC_00000090	.	+	194.78	-0.2900	0.08918	0.1979	0.01498
1	283812	284248	RLOC_00000090	.	+	336.01	-0.6390	0.0005059	0.007184	0.01498
1	284479	286351	RLOC_00000091	.	+	1549.61	0.5758	0.0005258	0.007367	0.0007377
1	286450	286623	RLOC_00000091	.	+	331.56	0.4605	0.001086	0.01146	0.0007377
1	286714	286808	RLOC_00000091	.	+	226.90	0.4347	0.0004359	0.006564	0.0007377
1	286908	287133	RLOC_00000091	.	+	303.94	0.4180	0.0003237	0.005441	0.0007377
1	287219	287281	RLOC_00000091	.	+	269.84	0.2205	0.05374	0.1407	0.0007377
1	287394	287514	RLOC_00000091	.	+	342.93	0.1843	0.03579	0.1069	0.0007377
1	287640	287710	RLOC_00000091	.	+	282.39	0.1342	0.1179	0.2391	0.0007377
1	287788	287854	RLOC_00000091	.	+	269.28	0.1753	0.06277	0.1563	0.0007377
1	288085	288176	RLOC_00000091	.	+	348.30	0.1408	0.1471	0.2782	0.0007377
1	288176	288506	RLOC_00000091	.	+	442.06	-0.0134	0.8306	0.8934	0.0007377
1	288591	288722	RLOC_00000091	.	+	487.03	-0.0179	0.8459	0.9034	0.0007377
1	288880	289234	RLOC_00000091	.	+	663.77	0.1810	0.05502	0.143	0.0007377
1	289234	289386	RLOC_00000091	.	+	562.43	0.0701	0.1549	0.2882	0.0007377
1	289537	289592	RLOC_00000091	.	+	450.04	-0.0480	0.7057	0.8057	0.0007377
1	289715	289776	RLOC_00000091	.	+	487.82	-0.2584	0.006102	0.03367	0.0007377
1	290026	290347	RLOC_00000091	.	+	963.81	-0.4637	0.0003623	0.005838	0.0007377
1	290438	290496	RLOC_00000091	.	+	637.82	-0.6161	7.811e-05	0.002258	0.0007377
1	290573	290652	RLOC_00000091	.	+	672.58	-0.6504	7.168e-06	0.0004562	0.0007377
1	290745	291123	RLOC_00000091	.	+	648.16	-0.7666	0.0002621	0.004782	0.0007377
1	293497	293754	RLOC_00000093	.	+	723.68	0.0760	0.1241	0.2479	0.2142
1	294053	294121	RLOC_00000093	.	+	570.12	0.0617	0.1344	0.2616	0.2142
1	294204	294386	RLOC_00000093	.	+	848.78	0.0417	0.0949	0.2063	0.2142
1	294508	295084	RLOC_00000093	.	+	1294.32	-0.3107	0.01902	0.07037	0.2142
1	295273	295343	RLOC_00000094	.	+	4.38	0.7213	0.1692	0.3063	0.7629
1	295391	295599	RLOC_00000094	.	+	9.58	-0.0657	0.9283	0.9566	0.7629
1	295654	295757	RLOC_00000094	.	+	9.47	-0.4212	0.4005	0.5518	0.7629
1	295988	296250	RLOC_00000095	.	-	660.96	-0.1850	0.1858	0.3264	0.02651
1	296357	296538	RLOC_00000095	.	-	940.93	-0.2031	0.02415	0.08239	0.02651
1	296625	296881	RLOC_00000095	.	-	626.01	-0.0928	0.2455	0.3955	0.02651
1	296949	297027	RLOC_00000095	.	-	397.16	-0.0368	0.6813	0.7875	0.02651
1	297100	297177	RLOC_00000095	.	-	386.72	0.1194	0.1956	0.3381	0.02651
1	297531	297745	RLOC_00000095	.	-	527.27	0.2940	0.001374	0.01322	0.02651
1	298012	298175	RLOC_00000095	.	-	239.40	0.4010	0.001127	0.01174	0.02651
1	298576	300515	RLOC_00000096	.	-	566.09	-0.5030	0.005787	0.03261	0.08872
1	300602	300665	RLOC_00000096	.	-	26.43	0.1002	0.04939	0.133	0.08872
1	300751	300832	RLOC_00000096	.	-	24.86	0.2227	0.01902	0.07037	0.08872
1	301487	301544	RLOC_00000096	.	-	13.50	0.3361	0.08311	0.1889	0.08872
1	302053	302141	RLOC_00000096	.	-	12.42	0.5730	0.02467	0.08356	0.08872
1	304134	304696	RLOC_00000099	.	-	249.17	-0.5318	0.005496	0.03154	0.0157
1	304696	304807	RLOC_00000099	.	-	134.92	-0.2692	0.04033	0.1159	0.0157
1	304879	304963	RLOC_00000099	.	-	110.25	-0.1563	0.4331	0.5818	0.0157
1	305037	305120	RLOC_00000099	.	-	94.04	0.1194	0.2221	0.3689	0.0157
1	305173	305258	RLOC_00000099	.	-	99.89	0.1614	0.1545	0.2876	0.0157
1	305346	305444	RLOC_00000099	.	-	79.17	0.0688	0.5024	0.6432	0.0157
1	305525	305702	RLOC_00000099	.	-	90.96	0.2653	0.06478	0.1596	0.0157
1	305784	306266	RLOC_00000099	.	-	147.43	0.4673	0.0005419	0.00748	0.0157
1	306536	306800	RLOC_00000102	.	-	23.91	-0.1561	0.6969	0.7992	0.4478
1	306892	307359	RLOC_00000102	.	-	38.89	0.0974	0.593	0.7193	0.4478
1	307440	307805	RLOC_00000102	.	-	37.55	0.0258	0.827	0.8911	0.4478
1	307888	308070	RLOC_00000102	.	-	26.51	-0.0610	0.7491	0.8378	0.4478
1	308147	308312	RLOC_00000102	.	-	14.40	-0.4005	0.2809	0.4339	0.4478
1	308396	308573	RLOC_00000102	.	-	14.87	-0.1572	0.833	0.8949	0.4478
1	308796	309033	RLOC_00000102	.	-	16.57	0.4971	0.05761	0.1474	0.4478
1	310335	310981	RLOC_00000104	.	+	61.20	0.4395	0.001028	0.01107	0.01311
1	311336	313094	RLOC_00000104	.	+	253.39	-0.2497	0.000419	0.006413	0.01311
1	313162	313761	RLOC_00000106	.	-	457.90	-0.1411	0.3911	0.543	0.2592
1	313879	313997	RLOC_00000106	.	-	252.50	0.0216	0.9138	0.9479	0.2592
1	314086	314226	RLOC_00000106	.	-	330.16	0.0204	0.9257	0.9553	0.2592
1	314439	314554	RLOC_00000106	.	-	338.57	-0.0520	0.4069	0.5578	0.2592
1	314651	314802	RLOC_00000106	.	-	371.14	-0.1049	0.2184	0.3647	0.2592
1	314889	315016	RLOC_00000106	.	-	369.11	0.0700	0.5103	0.6502	0.2592
1	315575	315892	RLOC_00000106	.	-	392.57	0.3037	0.02494	0.08419	0.2592
1	316169	316257	RLOC_00000108	.	+	46.91	0.2250	0.3695	0.5224	0.4109
1	316343	316440	RLOC_00000108	.	+	65.25	0.3827	0.04982	0.1338	0.4109
1	316537	316713	RLOC_00000108	.	+	90.73	0.3142	0.1012	0.2155	0.4109
1	316791	316897	RLOC_00000108	.	+	65.68	0.0631	0.488	0.6309	0.4109
1	317007	317090	RLOC_00000108	.	+	72.70	0.1886	0.2889	0.4422	0.4109
1	317293	317439	RLOC_00000108	.	+	99.73	0.1560	0.2779	0.4307	0.4109
1	317552	317642	RLOC_00000108	.	+	89.01	0.1915	0.2535	0.4044	0.4109
1	317759	317845	RLOC_00000108	.	+	96.18	-0.0978	0.4982	0.6397	0.4109
1	317845	318040	RLOC_00000108	.	+	107.31	-0.0610	0.6296	0.7485	0.4109
1	318144	318201	RLOC_00000108	.	+	92.27	-0.0111	0.9217	0.9527	0.4109
1	318272	318360	RLOC_00000108	.	+	3.80	1.3440	0.05091	0.1357	0.4109
1	318360	318433	RLOC_00000108	.	+	87.16	0.1900	0.1709	0.3084	0.4109
1	318564	318985	RLOC_00000108	.	+	151.31	-0.1460	0.2093	0.354	0.4109
1	318985	319101	RLOC_00000108	.	+	131.44	-0.2779	0.05502	0.143	0.4109
1	319203	319297	RLOC_00000108	.	+	126.67	-0.2170	0.2016	0.3451	0.4109
1	319370	319646	RLOC_00000108	.	+	138.83	-0.2505	0.2022	0.3458	0.4109
1	319839	320146	RLOC_00000109	.	-	138.23	-0.3250	0.01178	0.0515	0.02853
1	320379	320457	RLOC_00000109	.	-	98.72	-0.3100	0.009746	0.04552	0.02853
1	320768	321423	RLOC_00000109	.	-	256.09	-0.0849	0.2245	0.3717	0.02853
1	321750	321865	RLOC_00000109	.	-	84.07	0.1263	0.5916	0.7182	0.02853
1	321957	322406	RLOC_00000109	.	-	139.68	0.4401	0.001251	0.01247	0.02853
1	322512	322863	RLOC_00000109	.	-	90.02	0.4616	0.01029	0.0471	0.02853
1	323206	323282	RLOC_00000110	.	+	67.79	0.4908	0.00292	0.02106	0.0183
1	323678	323840	RLOC_00000110	.	+	134.25	0.3396	0.003806	0.02493	0.0183
1	324257	324416	RLOC_00000110	.	+	165.18	-0.1387	0.141	0.2703	0.0183
1	324635	324903	RLOC_00000110	.	+	178.60	-0.3481	0.00067	0.008572	0.0183
1	325380	325641	RLOC_00000111	.	+	40.20	0.1321	0.3967	0.5481	0.06279
1	325912	326013	RLOC_00000111	.	+	40.19	0.0320	0.5827	0.7109	0.06279
1	326105	326228	RLOC_00000111	.	+	45.37	0.3671	0.03641	0.1082	0.06279
1	326331	326517	RLOC_00000111	.	+	68.67	0.4528	0.003653	0.02428	0.06279
1	326593	326815	RLOC_00000111	.	+	69.46	0.2357	0.1035	0.2189	0.06279
1	326925	327084	RLOC_00000111	.	+	60.26	0.0359	0.5413	0.6766	0.06279
1	327236	327386	RLOC_00000111	.	+	63.07	0.2766	0.03021	0.09548	0.06279
1	327487	327576	RLOC_00000111	.	+	46.19	0.2442	0.1847	0.3252	0.06279
1	327662	327866	RLOC_00000111	.	+	87.72	0.0135	0.8705	0.9194	0.06279
1	327999	328108	RLOC_00000111	.	+	85.63	0.0240	0.5533	0.6866	0.06279
1	328187	328322	RLOC_00000111	.	+	76.75	-0.0374	0.7672	0.8503	0.06279
1	328423	328555	RLOC_00000111	.	+	77.21	0.1924	0.2531	0.4039	0.06279
1	328897	329030	RLOC_00000111	.	+	95.11	0.1755	0.1455	0.2762	0.06279
1	329118	329211	RLOC_00000111	.	+	82.24	0.0871	0.2899	0.4433	0.06279
1	329310	329475	RLOC_00000111	.	+	105.88	-0.0805	0.7261	0.8206	0.06279
1	329552	329698	RLOC_00000111	.	+	121.68	-0.2336	0.179	0.3183	0.06279
1	329779	329926	RLOC_00000111	.	+	160.41	-0.3267	0.03143	0.09806	0.06279
1	330026	330155	RLOC_00000111	.	+	150.76	-0.4596	0.0115	0.05068	0.06279
1	330242	330499	RLOC_00000111	.	+	128.79	-0.4550	0.02559	0.08564	0.06279
1	330603	331441	RLOC_00000112	.	-	866.02	-0.5708	0.001751	0.01533	0.00206
1	331532	332183	RLOC_00000112	.	-	539.55	-0.2084	0.05069	0.1354	0.00206
1	332274	332634	RLOC_00000112	.	-	279.90	0.0991	0.305	0.4588	0.00206
1	332723	333045	RLOC_00000112	.	-	268.32	-0.1181	0.5313	0.6685	0.00206
1	333128	333629	RLOC_00000112	.	-	382.32	-0.1193	0.8111	0.8806	0.00206
1	333904	334178	RLOC_00000112	.	-	207.54	0.1163	0.09857	0.2116	0.00206
1	334469	334764	RLOC_00000112	.	-	159.05	0.1697	0.03629	0.1079	0.00206
1	334898	335322	RLOC_00000112	.	-	219.03	0.2166	0.02519	0.08474	0.00206
1	335418	335773	RLOC_00000112	.	-	172.69	0.4625	2.999e-05	0.001217	0.00206
1	335915	336233	RLOC_00000112	.	-	152.73	0.5521	0.0002433	0.004568	0.00206
1	336416	337773	RLOC_00000112	.	-	478.77	0.3201	0.006192	0.03401	0.00206
1	338276	338987	RLOC_00000113	.	+	298.01	0.2799	0.0026	0.0196	0.04323
1	339125	340071	RLOC_00000113	.	+	580.01	-0.2464	0.002209	0.0177	0.04323
1	347903	348127	RLOC_00000117	.	+	26.93	0.2649	0.2297	0.3776	0.004765
1	348211	348267	RLOC_00000117	.	+	25.09	0.6299	0.03465	0.1047	0.004765
1	348372	348454	RLOC_00000117	.	+	27.48	0.6559	0.02144	0.07625	0.004765
1	348561	348640	RLOC_00000117	.	+	28.58	0.8359	0.02037	0.07368	0.004765
1	348734	348785	RLOC_00000117	.	+	28.04	0.4940	0.0598	0.1512	0.004765
1	348879	348976	RLOC_00000117	.	+	31.88	0.5025	0.03645	0.1083	0.004765
1	349237	349720	RLOC_00000117	.	+	64.13	0.4878	0.002446	0.01888	0.004765
1	349802	349886	RLOC_00000117	.	+	39.92	0.2340	0.5	0.6412	0.004765
1	350048	350147	RLOC_00000117	.	+	38.72	0.6661	0.02654	0.08772	0.004765
1	350225	350296	RLOC_00000117	.	+	45.28	0.1013	0.6833	0.7889	0.004765
1	350473	350570	RLOC_00000117	.	+	51.73	0.0914	0.7763	0.8568	0.004765
1	350657	350783	RLOC_00000117	.	+	63.34	-0.1635	0.2765	0.4293	0.004765
1	350868	350966	RLOC_00000117	.	+	65.98	-0.0046	0.8763	0.9232	0.004765
1	351043	351160	RLOC_00000117	.	+	66.78	-0.0675	0.6017	0.7262	0.004765
1	351251	351329	RLOC_00000117	.	+	67.00	0.0147	0.9565	0.9741	0.004765
1	351411	351632	RLOC_00000117	.	+	95.94	-0.3201	0.02205	0.07763	0.004765
1	351724	351819	RLOC_00000117	.	+	57.35	-0.7431	0.0004822	0.006973	0.004765
1	351911	352001	RLOC_00000117	.	+	57.52	-0.3473	0.05039	0.1348	0.004765
1	352125	352482	RLOC_00000117	.	+	93.80	-0.4381	0.07017	0.1684	0.004765
1	354579	354662	RLOC_00000117	.	+	3.31	-4.6333	9.977e-05	0.002619	0.004765
1	352662	353162	RLOC_00000118	.	-	207.53	-0.1425	0.157	0.2908	0.7238
1	353237	354826	RLOC_00000118	.	-	481.97	0.1204	0.1477	0.2791	0.7238
1	359067	360149	RLOC_00000119	.	-	251.17	-0.2656	0.0001041	0.002692	0.004898
1	360239	360798	RLOC_00000119	.	-	90.95	0.2471	0.3218	0.4757	0.004898
1	360868	361331	RLOC_00000119	.	-	94.23	0.0648	0.7914	0.8673	0.004898
1	361331	363105	RLOC_00000119	.	-	221.16	0.2818	0.01824	0.06852	0.004898
1	365645	366325	RLOC_00000120	.	+	42.08	0.1308	0.3376	0.4917	0.9013
1	366722	366859	RLOC_00000120	.	+	17.30	0.0293	0.8419	0.9007	0.9013
1	366985	367241	RLOC_00000120	.	+	17.08	-0.2226	0.2918	0.4454	0.9013
1	373509	373786	RLOC_00000124	.	+	86.39	0.3590	0.04105	0.1173	0.001208
1	373891	374111	RLOC_00000124	.	+	92.78	0.4189	0.02206	0.07764	0.001208
1	374111	374189	RLOC_00000124	.	+	58.83	0.4065	0.002097	0.01713	0.001208
1	374271	374500	RLOC_00000124	.	+	87.27	0.3993	0.003039	0.02162	0.001208
1	374582	374922	RLOC_00000124	.	+	130.00	0.6540	6.847e-05	0.002081	0.001208
1	375124	375238	RLOC_00000124	.	+	67.91	0.6463	0.002067	0.01695	0.001208
1	375324	375453	RLOC_00000124	.	+	78.30	0.7031	0.0002456	0.004594	0.001208
1	375527	375719	RLOC_00000124	.	+	97.45	0.7308	0.0001666	0.003628	0.001208
1	375807	376002	RLOC_00000124	.	+	99.65	0.3674	0.004777	0.02878	0.001208
1	376113	376251	RLOC_00000124	.	+	61.76	0.2817	0.0144	0.05879	0.001208
1	376351	376403	RLOC_00000124	.	+	50.41	0.2438	0.02559	0.08564	0.001208
1	376403	376474	RLOC_00000124	.	+	49.39	0.4006	0.008829	0.04276	0.001208
1	376561	376815	RLOC_00000124	.	+	92.34	0.7271	0.001018	0.01101	0.001208
1	376924	377028	RLOC_00000124	.	+	81.24	0.4747	0.008464	0.04161	0.001208
1	377210	377305	RLOC_00000124	.	+	100.25	0.2357	0.0121	0.05239	0.001208
1	377390	377615	RLOC_00000124	.	+	133.07	0.1865	0.02212	0.07777	0.001208
1	377880	378036	RLOC_00000124	.	+	114.07	0.2815	0.00617	0.03393	0.001208
1	378116	378191	RLOC_00000124	.	+	88.08	0.3762	0.003922	0.02541	0.001208
1	378297	378366	RLOC_00000124	.	+	75.66	0.6202	0.001731	0.01521	0.001208
1	378503	378586	RLOC_00000124	.	+	69.00	0.5770	0.00926	0.04406	0.001208
1	378586	378649	RLOC_00000124	.	+	65.56	0.4966	0.005978	0.03328	0.001208
1	378745	378854	RLOC_00000124	.	+	74.59	0.5059	3.26e-05	0.001286	0.001208
1	378942	379089	RLOC_00000124	.	+	111.20	0.4498	1.407e-05	0.0007298	0.001208
1	379304	379433	RLOC_00000124	.	+	127.20	0.3907	0.006944	0.03656	0.001208
1	379527	379770	RLOC_00000124	.	+	154.30	0.2357	0.01239	0.05319	0.001208
1	379865	380003	RLOC_00000124	.	+	121.10	0.3003	0.00411	0.02617	0.001208
1	380085	380174	RLOC_00000124	.	+	106.29	0.2280	0.007687	0.03901	0.001208
1	380269	380375	RLOC_00000124	.	+	112.34	0.2591	0.009466	0.04468	0.001208
1	380601	380697	RLOC_00000124	.	+	118.46	0.0647	0.08002	0.184	0.001208
1	380845	380999	RLOC_00000124	.	+	139.31	0.1705	0.02429	0.08273	0.001208
1	381149	381332	RLOC_00000124	.	+	159.70	0.0642	0.1425	0.2723	0.001208
1	381404	381634	RLOC_00000124	.	+	219.63	-0.2000	0.7825	0.8612	0.001208
1	381729	381832	RLOC_00000124	.	+	157.87	-0.3470	0.1659	0.3021	0.001208
1	381911	382040	RLOC_00000124	.	+	168.74	-0.2106	0.9468	0.968	0.001208
1	382372	382568	RLOC_00000124	.	+	184.24	-0.0072	0.2064	0.3507	0.001208
1	382802	382929	RLOC_00000124	.	+	162.30	-0.0068	0.2717	0.4245	0.001208
1	383013	383130	RLOC_00000124	.	+	152.73	-0.0026	0.4572	0.6035	0.001208
1	383393	383529	RLOC_00000124	.	+	166.06	0.0131	0.5228	0.6611	0.001208
1	383607	383688	RLOC_00000124	.	+	139.53	-0.1071	0.9859	0.9918	0.001208
1	384083	384230	RLOC_00000124	.	+	182.83	-0.2042	0.3663	0.5194	0.001208
1	384316	384449	RLOC_00000124	.	+	158.53	-0.2193	0.2867	0.44	0.001208
1	384693	384840	RLOC_00000124	.	+	304.49	-0.2348	0.2493	0.3997	0.001208
1	384906	384969	RLOC_00000124	.	+	273.58	-0.2974	0.1345	0.2618	0.001208
1	385169	385325	RLOC_00000124	.	+	311.07	-0.2183	0.2697	0.4223	0.001208
1	385430	385623	RLOC_00000124	.	+	299.09	-0.4335	0.0129	0.05468	0.001208
1	385712	385817	RLOC_00000124	.	+	255.33	-0.6071	0.007279	0.0377	0.001208
1	385907	386044	RLOC_00000124	.	+	280.14	-0.8149	0.0002336	0.004463	0.001208
1	386130	386334	RLOC_00000124	.	+	414.64	-0.7986	0.000216	0.004259	0.001208
1	386426	386840	RLOC_00000124	.	+	535.97	-0.9867	0.0004377	0.006579	0.001208
1	387271	387505	RLOC_00000125	.	-	327.39	-0.3647	0.01367	0.05678	0.01575
1	387582	387674	RLOC_00000125	.	-	334.67	-0.3647	0.0005438	0.007498	0.01575
1	387841	388406	RLOC_00000125	.	-	438.15	-0.1568	0.1178	0.2391	0.01575
1	388538	388609	RLOC_00000125	.	-	293.17	0.0420	0.7202	0.8164	0.01575
1	388849	388940	RLOC_00000125	.	-	253.00	0.2271	0.01608	0.0632	0.01575
1	389049	389138	RLOC_00000125	.	-	271.81	0.1375	0.1677	0.3044	0.01575
1	389224	389301	RLOC_00000125	.	-	256.03	0.2679	0.02975	0.09449	0.01575
1	389409	389647	RLOC_00000125	.	-	298.15	0.2993	0.01208	0.05233	0.01575
1	389823	389943	RLOC_00000126	.	+	148.67	0.2248	0.0385	0.1123	0.0001439
1	390021	390399	RLOC_00000126	.	+	397.08	0.0550	0.2851	0.4383	0.0001439
1	390482	390564	RLOC_00000126	.	+	257.09	-0.1428	0.5398	0.6754	0.0001439
1	390760	391123	RLOC_00000126	.	+	372.75	-0.2402	0.03214	0.09952	0.0001439
1	391456	391541	RLOC_00000126	.	+	242.98	-0.3482	0.02081	0.07475	0.0001439
1	391650	391717	RLOC_00000126	.	+	247.92	-0.2417	0.2726	0.4253	0.0001439
1	392020	392278	RLOC_00000126	.	+	273.71	-0.3653	0.007465	0.03828	0.0001439
1	392372	393875	RLOC_00000126	.	+	933.83	-0.2495	0.04939	0.133	0.0001439
1	393965	394153	RLOC_00000126	.	+	131.93	0.0839	0.2419	0.3914	0.0001439
1	394227	394451	RLOC_00000126	.	+	190.87	-0.1554	0.5283	0.6658	0.0001439
1	394670	395534	RLOC_00000126	.	+	564.67	-0.3902	1.73e-06	0.0001613	0.0001439
1	395534	395665	RLOC_00000126	.	+	14.60	0.8345	0.02201	0.07752	0.0001439
1	395665	395946	RLOC_00000126	.	+	276.00	0.2876	0.01336	0.05594	0.0001439
1	396026	396088	RLOC_00000126	.	+	218.37	0.2672	0.03143	0.09806	0.0001439
1	396166	396218	RLOC_00000126	.	+	181.68	0.4950	0.0004788	0.00695	0.0001439
1	396289	396356	RLOC_00000126	.	+	212.06	0.4554	0.0001162	0.002878	0.0001439
1	396437	396534	RLOC_00000126	.	+	295.11	0.3495	0.0008103	0.009609	0.0001439
1	396606	396727	RLOC_00000126	.	+	351.46	0.1660	0.04137	0.1179	0.0001439
1	396790	396864	RLOC_00000126	.	+	305.62	0.1260	0.1264	0.251	0.0001439
1	396940	397100	RLOC_00000126	.	+	333.79	0.1856	0.03519	0.1057	0.0001439
1	397100	397249	RLOC_00000126	.	+	14.49	0.3569	0.3289	0.483	0.0001439
1	397249	397754	RLOC_00000126	.	+	225.52	0.0363	0.3944	0.546	0.0001439
1	397876	397964	RLOC_00000126	.	+	275.31	0.1836	0.01615	0.06337	0.0001439
1	398062	398152	RLOC_00000126	.	+	288.82	0.3329	0.001062	0.01129	0.0001439
1	398291	398346	RLOC_00000126	.	+	246.84	0.4338	8.024e-07	8.948e-05	0.0001439
1	398399	398527	RLOC_00000126	.	+	235.03	0.3285	2.747e-05	0.001143	0.0001439
1	398611	399111	RLOC_00000126	.	+	523.54	-0.1195	0.4411	0.589	0.0001439
1	399180	399394	RLOC_00000126	.	+	648.24	-0.2232	0.06916	0.1668	0.0001439
1	399394	399939	RLOC_00000126	.	+	1035.41	-0.4531	0.0005012	0.007144	0.0001439
1	400033	400448	RLOC_00000127	.	-	910.34	-0.1509	0.07429	0.1751	0.5195
1	400724	400829	RLOC_00000127	.	-	624.08	0.0183	0.5572	0.69	0.5195
1	400929	401086	RLOC_00000127	.	-	704.97	0.0565	0.1197	0.2418	0.5195
1	401163	401235	RLOC_00000127	.	-	437.01	0.0602	0.2665	0.4187	0.5195
1	401594	401667	RLOC_00000127	.	-	287.34	-0.0494	0.7287	0.8226	0.5195
1	401774	401863	RLOC_00000127	.	-	172.78	-0.0010	0.9321	0.959	0.5195
1	403194	403568	RLOC_00000130	.	-	1182.60	-0.1426	0.469	0.6141	0.9584
1	403623	403959	RLOC_00000130	.	-	1899.73	0.0225	0.4071	0.558	0.9584
1	404026	404439	RLOC_00000130	.	-	1686.10	0.0183	0.6957	0.7982	0.9584
1	404611	404669	RLOC_00000131	.	+	37.38	0.7829	0.01131	0.05015	0.000546
1	404756	404842	RLOC_00000131	.	+	67.10	0.3312	0.09462	0.2059	0.000546
1	405229	405316	RLOC_00000131	.	+	74.54	0.6321	0.0008408	0.009812	0.000546
1	405429	405485	RLOC_00000131	.	+	60.54	0.8390	4.754e-06	0.0003409	0.000546
1	405643	405765	RLOC_00000131	.	+	96.25	0.3415	0.0155	0.06173	0.000546
1	405765	405891	RLOC_00000131	.	+	14.13	0.7652	0.0286	0.09203	0.000546
1	405891	405951	RLOC_00000131	.	+	111.07	0.1241	0.215	0.3607	0.000546
1	406060	406132	RLOC_00000131	.	+	109.33	0.1818	0.2034	0.3472	0.000546
1	406246	406310	RLOC_00000131	.	+	100.69	0.1494	0.2163	0.3623	0.000546
1	406409	406518	RLOC_00000131	.	+	107.76	0.3960	0.01931	0.07105	0.000546
1	406518	406792	RLOC_00000131	.	+	105.22	0.3849	0.01266	0.05396	0.000546
1	406902	406989	RLOC_00000131	.	+	100.07	0.4640	0.015	0.06039	0.000546
1	407078	407147	RLOC_00000131	.	+	99.20	0.4628	0.00279	0.0205	0.000546
1	407320	407390	RLOC_00000131	.	+	112.38	0.3315	0.01972	0.07209	0.000546
1	407467	407550	RLOC_00000131	.	+	124.68	0.1108	0.23	0.378	0.000546
1	407721	407821	RLOC_00000131	.	+	185.58	-0.1075	0.8842	0.9284	0.000546
1	408070	408138	RLOC_00000131	.	+	173.11	-0.3631	0.1925	0.3343	0.000546
1	408235	408647	RLOC_00000131	.	+	245.49	-0.5175	0.0302	0.09547	0.000546
1	408726	409140	RLOC_00000131	.	+	817.27	0.1374	0.1108	0.2291	0.000546
1	409216	410659	RLOC_00000131	.	+	3441.71	-0.2368	0.005055	0.02988	0.000546
1	410659	410763	RLOC_00000131	.	+	18.01	1.2625	3.789e-05	0.001418	0.000546
1	410763	410893	RLOC_00000131	.	+	279.70	-0.0048	0.3978	0.5492	0.000546
1	411176	411633	RLOC_00000131	.	+	542.23	-0.1725	0.6962	0.7986	0.000546
1	411759	412258	RLOC_00000131	.	+	198.10	0.1606	0.2234	0.3704	0.000546
1	412459	412790	RLOC_00000131	.	+	267.16	-0.1864	0.3692	0.5221	0.000546
1	412880	413004	RLOC_00000131	.	+	243.54	-0.2667	0.1975	0.3403	0.000546
1	413074	413567	RLOC_00000131	.	+	398.99	-0.5680	0.01114	0.04964	0.000546
1	413541	414218	RLOC_00000132	.	-	116.35	-0.1665	0.4717	0.6165	0.9713
1	414423	414633	RLOC_00000132	.	-	26.09	0.1600	0.4451	0.5927	0.9713
1	418779	419211	RLOC_00000134	.	+	398.35	1.1091	2.233e-10	7.938e-08	0
1	419295	419529	RLOC_00000134	.	+	492.66	0.9246	6.429e-12	3.116e-09	0
1	419529	419674	RLOC_00000134	.	+	52.89	3.1741	6.601e-35	3.408e-31	0
1	419674	419894	RLOC_00000134	.	+	382.47	0.2245	0.07963	0.1834	0
1	419894	419971	RLOC_00000134	.	+	6.66	1.4909	0.003596	0.02404	0
1	420178	420240	RLOC_00000134	.	+	5.19	0.0963	0.9443	0.9665	0
1	420273	420378	RLOC_00000134	.	+	5.17	0.6250	0.5181	0.657	0
1	420513	420889	RLOC_00000134	.	+	654.48	-0.2117	0.004933	0.02943	0
1	420981	421092	RLOC_00000134	.	+	373.13	-0.2824	0.001709	0.0151	0
1	421190	421393	RLOC_00000134	.	+	509.39	-0.2425	0.002965	0.02128	0
1	421525	421635	RLOC_00000134	.	+	395.64	-0.3499	0.0007109	0.008875	0
1	421734	422438	RLOC_00000134	.	+	1084.54	-0.7019	1.623e-05	0.0008049	0
1	428799	429099	RLOC_00000137	.	-	32.07	-0.0547	0.7445	0.8343	0.5794
1	429247	429370	RLOC_00000137	.	-	21.64	0.0739	0.5459	0.6805	0.5794
1	429461	429778	RLOC_00000137	.	-	31.04	-0.4071	0.09127	0.201	0.5794
1	429850	429997	RLOC_00000137	.	-	18.70	0.2099	0.4271	0.5762	0.5794
1	430068	430316	RLOC_00000137	.	-	22.19	0.2763	0.3863	0.5383	0.5794
1	430413	430652	RLOC_00000137	.	-	17.08	-0.0768	0.8254	0.8901	0.5794
1	436746	436797	RLOC_00000139	.	-	3.67	-0.2742	0.5427	0.6778	0.9943
1	436797	436852	RLOC_00000139	.	-	3.25	0.3243	0.5475	0.6818	0.9943
1	440501	440568	RLOC_00000141	.	-	7.15	-0.5430	0.3947	0.5463	0.4938
1	440575	441013	RLOC_00000141	.	-	149.01	-0.1065	0.3927	0.5444	0.4938
1	441135	441325	RLOC_00000141	.	-	104.85	-0.1170	0.08222	0.1876	0.4938
1	441397	442915	RLOC_00000141	.	-	263.68	0.3313	0.06773	0.1644	0.4938
1	443187	443526	RLOC_00000142	.	-	286.63	-0.8087	7.766e-05	0.002252	0.004038
1	443628	443737	RLOC_00000142	.	-	164.72	-0.3681	0.02044	0.07384	0.004038
1	443972	444089	RLOC_00000142	.	-	143.79	-0.1072	0.9596	0.9761	0.004038
1	444257	444383	RLOC_00000142	.	-	146.73	-0.1040	0.9469	0.968	0.004038
1	444488	444597	RLOC_00000142	.	-	122.46	-0.0990	0.9273	0.9562	0.004038
1	444682	444762	RLOC_00000142	.	-	96.79	0.1324	0.1196	0.2417	0.004038
1	444842	445066	RLOC_00000142	.	-	170.10	0.2797	0.0008412	0.009814	0.004038
1	445453	445560	RLOC_00000142	.	-	127.88	0.3429	0.0001607	0.003544	0.004038
1	445647	445752	RLOC_00000142	.	-	120.36	0.1200	0.1696	0.3068	0.004038
1	445843	445942	RLOC_00000142	.	-	133.86	0.1844	0.06427	0.1588	0.004038
1	446029	446210	RLOC_00000142	.	-	112.45	0.2409	0.07546	0.1769	0.004038
1	448470	448974	RLOC_00000143	.	-	911.47	-0.4160	0.01777	0.06741	0.1108
1	448974	449053	RLOC_00000143	.	-	5.14	-1.5046	0.00779	0.03935	0.1108
1	449053	449124	RLOC_00000143	.	-	571.27	-0.1830	0.1226	0.2458	0.1108
1	449224	449490	RLOC_00000143	.	-	876.89	-0.1006	0.146	0.2767	0.1108
1	449712	449838	RLOC_00000143	.	-	424.82	0.2324	0.01355	0.05643	0.1108
1	449937	450048	RLOC_00000143	.	-	501.84	0.1668	0.06892	0.1664	0.1108
1	450149	450259	RLOC_00000143	.	-	432.86	0.1530	0.1278	0.2529	0.1108
1	450360	452066	RLOC_00000143	.	-	660.50	0.2085	0.02217	0.07786	0.1108
1	452582	452732	RLOC_00000143	.	-	28.93	0.6154	0.0171	0.06574	0.1108
1	453215	453365	RLOC_00000144	.	+	55.55	0.3617	0.1212	0.2439	0.02766
1	453593	453647	RLOC_00000144	.	+	70.04	0.2121	0.2017	0.3452	0.02766
1	453729	453810	RLOC_00000144	.	+	80.13	0.2592	0.08514	0.1919	0.02766
1	453906	454336	RLOC_00000144	.	+	208.74	0.1880	0.01928	0.07099	0.02766
1	454414	454540	RLOC_00000144	.	+	193.44	0.1075	0.1326	0.2592	0.02766
1	454620	454840	RLOC_00000144	.	+	302.43	0.0703	0.1625	0.2978	0.02766
1	454925	455147	RLOC_00000144	.	+	305.90	-0.1949	0.08397	0.1902	0.02766
1	455147	455517	RLOC_00000144	.	+	324.22	-0.5222	0.001195	0.01216	0.02766
1	455706	455914	RLOC_00000145	.	+	439.85	0.4420	6.649e-06	0.0004326	0.0006981
1	456176	456231	RLOC_00000145	.	+	483.70	0.4312	5.367e-05	0.001779	0.0006981
1	456313	456394	RLOC_00000145	.	+	482.74	0.2885	0.001211	0.01226	0.0006981
1	456489	456646	RLOC_00000145	.	+	644.92	0.2574	0.0002756	0.004929	0.0006981
1	456840	456917	RLOC_00000145	.	+	477.20	0.1797	0.01117	0.04972	0.0006981
1	457008	457135	RLOC_00000145	.	+	830.00	-0.0292	0.7268	0.8212	0.0006981
1	457208	457430	RLOC_00000145	.	+	1288.21	-0.1468	0.2134	0.3588	0.0006981
1	457511	457627	RLOC_00000145	.	+	1026.06	-0.2519	0.001842	0.01577	0.0006981
1	457627	457752	RLOC_00000145	.	+	799.68	-0.3622	0.00396	0.02556	0.0006981
1	457839	458146	RLOC_00000145	.	+	1174.62	-0.4598	0.006456	0.0349	0.0006981
1	458270	458421	RLOC_00000147	.	-	12.98	-0.1623	0.4153	0.5655	0.9613
1	458421	458636	RLOC_00000147	.	-	14.67	-0.1969	0.5473	0.6816	0.9613
1	458731	458796	RLOC_00000147	.	-	7.51	0.4536	0.4172	0.5672	0.9613
1	458805	458928	RLOC_00000147	.	-	7.52	0.2039	0.8573	0.9106	0.9613
1	462050	462384	RLOC_00000150	.	-	253.93	-0.4286	0.01601	0.06303	9.319e-05
1	462474	462632	RLOC_00000150	.	-	282.34	-0.1365	0.3272	0.4812	9.319e-05
1	462726	462800	RLOC_00000150	.	-	195.45	0.0349	0.9303	0.9579	9.319e-05
1	462875	462999	RLOC_00000150	.	-	270.71	-0.0181	0.6952	0.7979	9.319e-05
1	463122	463323	RLOC_00000150	.	-	312.22	-0.0361	0.5959	0.7217	9.319e-05
1	463420	463592	RLOC_00000150	.	-	171.43	0.0740	0.8638	0.915	9.319e-05
1	463860	464523	RLOC_00000150	.	-	265.35	-1.1832	4.692e-07	5.805e-05	9.319e-05
1	464761	464912	RLOC_00000150	.	-	62.94	-0.9247	0.01033	0.04723	9.319e-05
1	465667	467097	RLOC_00000150	.	-	3808.10	-0.0277	0.3691	0.5219	9.319e-05
1	467159	467555	RLOC_00000150	.	-	2003.11	0.4002	0.0008349	0.009783	9.319e-05
1	467648	467840	RLOC_00000150	.	-	832.33	0.3813	0.02843	0.09167	9.319e-05
1	469797	470009	RLOC_00000151	.	+	91.17	0.2783	0.1688	0.3058	0.762
1	470009	470118	RLOC_00000151	.	+	27.46	-0.3086	0.343	0.497	0.762
1	470240	470482	RLOC_00000151	.	+	132.98	0.0526	0.5399	0.6755	0.762
1	470572	470845	RLOC_00000151	.	+	150.75	-0.2653	0.3292	0.4834	0.762
1	472045	472507	RLOC_00000153	.	-	64.82	-0.1282	0.5404	0.6759	0.994
1	472667	473108	RLOC_00000153	.	-	45.92	0.1483	0.5499	0.6838	0.994
1	474492	474887	RLOC_00000154	.	+	35.84	0.2397	0.2583	0.4098	0.8255
1	475141	476478	RLOC_00000154	.	+	192.65	-0.1198	0.2137	0.3593	0.8255
1	477028	477139	RLOC_00000155	.	+	7.85	0.6697	0.2763	0.4291	0.00457
1	477139	477205	RLOC_00000155	.	+	34.98	0.1756	0.5764	0.7057	0.00457
1	477715	478304	RLOC_00000155	.	+	228.53	0.0774	0.6302	0.749	0.00457
1	478523	478669	RLOC_00000155	.	+	111.69	0.1461	0.1934	0.3353	0.00457
1	478669	478720	RLOC_00000155	.	+	3.52	-1.3134	0.06498	0.1599	0.00457
1	478783	478982	RLOC_00000155	.	+	79.97	-0.1503	0.3567	0.5103	0.00457
1	478982	479078	RLOC_00000155	.	+	13.64	-1.6430	9.397e-05	0.002519	0.00457
1	480865	481619	RLOC_00000156	.	+	203.12	0.3436	0.0006396	0.008326	0.004289
1	481619	481762	RLOC_00000156	.	+	7.76	2.0942	0.0001875	0.003897	0.004289
1	482269	483355	RLOC_00000156	.	+	383.91	-0.4784	8.523e-05	0.002373	0.004289
1	486945	487364	RLOC_00000157	.	+	36.55	0.4699	0.05833	0.1487	0.4513
1	488719	489062	RLOC_00000157	.	+	34.39	-0.0405	0.655	0.7678	0.4513
1	489145	489412	RLOC_00000157	.	+	29.00	-0.4488	0.09006	0.1992	0.4513
1	490928	491006	RLOC_00000159	.	+	40.68	0.1136	0.4802	0.6241	0.3681
1	491233	491379	RLOC_00000159	.	+	106.40	0.0986	0.3459	0.4998	0.3681
1	491487	491803	RLOC_00000159	.	+	279.04	0.0781	0.2773	0.4302	0.3681
1	491906	491960	RLOC_00000159	.	+	177.37	0.0517	0.3451	0.4991	0.3681
1	492084	492158	RLOC_00000159	.	+	195.30	0.0823	0.2209	0.3675	0.3681
1	492237	492353	RLOC_00000159	.	+	205.71	0.0113	0.6279	0.7472	0.3681
1	492442	492524	RLOC_00000159	.	+	168.87	-0.1114	0.5311	0.6683	0.3681
1	492606	492925	RLOC_00000159	.	+	231.39	-0.5682	0.04196	0.119	0.3681
1	511898	511990	RLOC_00000165	.	-	7.59	-1.0811	0.02796	0.09065	0.004983
1	513351	513455	RLOC_00000165	.	-	4.54	0.2705	0.4336	0.5823	0.004983
1	513849	514034	RLOC_00000165	.	-	318.31	-0.4146	0.03028	0.09567	0.004983
1	514034	514104	RLOC_00000165	.	-	16.51	0.2338	0.5673	0.6984	0.004983
1	514104	514185	RLOC_00000165	.	-	567.82	-0.2399	0.0006723	0.008587	0.004983
1	514268	514320	RLOC_00000165	.	-	619.79	-0.1889	0.0004144	0.006376	0.004983
1	514417	514470	RLOC_00000165	.	-	666.42	-0.0601	0.04812	0.1306	0.004983
1	514552	514802	RLOC_00000165	.	-	880.62	0.1010	0.8586	0.9115	0.004983
1	514888	514997	RLOC_00000165	.	-	561.94	0.4301	0.003986	0.02566	0.004983
1	515092	515381	RLOC_00000165	.	-	671.81	0.6212	0.0001069	0.002735	0.004983
1	518255	518378	RLOC_00000168	.	+	1491.18	0.2272	4.09e-05	0.001488	0.002319
1	519030	520438	RLOC_00000168	.	+	13081.75	-0.2072	3.55e-05	0.001355	0.002319
1	525389	525462	RLOC_00000170	.	+	3.60	2.7971	0.000755	0.009213	0.01999
1	525931	525997	RLOC_00000170	.	+	6.07	0.7060	0.2172	0.3634	0.01999
1	526055	526117	RLOC_00000170	.	+	6.15	-0.0032	0.9128	0.9473	0.01999
1	526117	526187	RLOC_00000170	.	+	5.66	0.5215	0.3063	0.4601	0.01999
1	526527	526601	RLOC_00000170	.	+	5.34	-0.6052	0.3249	0.4789	0.01999
1	526884	526979	RLOC_00000170	.	+	4.98	0.0137	0.8181	0.8852	0.01999
1	527087	527202	RLOC_00000170	.	+	5.32	0.6576	0.139	0.2677	0.01999
1	527317	527447	RLOC_00000170	.	+	7.50	1.0855	0.03829	0.1119	0.01999
1	527447	527577	RLOC_00000170	.	+	9.75	0.3013	0.7975	0.8713	0.01999
1	527657	527791	RLOC_00000170	.	+	7.34	-0.4349	0.5808	0.7095	0.01999
1	528168	528309	RLOC_00000170	.	+	13.68	-0.6117	0.0992	0.2125	0.01999
1	528391	528735	RLOC_00000170	.	+	19.54	-0.8219	0.00137	0.01319	0.01999
1	537804	537862	RLOC_00000174	.	+	16.46	0.7764	0.04312	0.1212	0.03907
1	537862	538131	RLOC_00000174	.	+	2044.09	0.2540	0.003108	0.0219	0.03907
1	538206	538328	RLOC_00000174	.	+	2242.95	0.1790	0.002873	0.02086	0.03907
1	538416	538533	RLOC_00000174	.	+	2201.66	0.1269	0.007269	0.03768	0.03907
1	538626	538720	RLOC_00000174	.	+	1776.69	0.0007	0.3831	0.5354	0.03907
1	538934	539008	RLOC_00000174	.	+	1921.09	-0.1194	0.2421	0.3916	0.03907
1	539388	539489	RLOC_00000174	.	+	2299.86	-0.0556	0.9824	0.9897	0.03907
1	539607	540095	RLOC_00000174	.	+	4279.34	-0.4518	0.001934	0.01625	0.03907
1	553028	553917	RLOC_00000181	.	-	567.32	-0.3169	0.002651	0.01986	0.04441
1	553944	554071	RLOC_00000181	.	-	19.64	-0.8228	0.01339	0.05602	0.04441
1	554071	554613	RLOC_00000181	.	-	397.48	-0.0407	0.7333	0.826	0.04441
1	554795	555128	RLOC_00000181	.	-	282.46	0.0598	0.2692	0.4216	0.04441
1	555128	555187	RLOC_00000181	.	-	8.36	0.6174	0.1016	0.216	0.04441
1	555570	555643	RLOC_00000181	.	-	341.86	0.0443	0.2838	0.437	0.04441
1	555725	556004	RLOC_00000181	.	-	362.89	0.1944	0.002293	0.01813	0.04441
1	557022	557083	RLOC_00000182	.	-	6.55	-0.9608	0.03694	0.1092	0.3385
1	557163	557533	RLOC_00000182	.	-	20.92	-0.1924	0.2192	0.3656	0.3385
1	557593	558120	RLOC_00000182	.	-	30.65	0.4434	0.1049	0.2208	0.3385
1	558208	558503	RLOC_00000182	.	-	20.40	0.2157	0.6149	0.737	0.3385
1	557369	557605	RLOC_00000183	.	+	20.13	0.7664	0.005313	0.03088	0.08324
1	557849	558121	RLOC_00000183	.	+	18.49	-0.4633	0.06817	0.1652	0.08324
1	558286	558899	RLOC_00000183	.	+	46.73	-0.2584	0.4834	0.6269	0.08324
1	561118	561259	RLOC_00000185	.	-	5.85	-0.7012	0.06275	0.1563	0.4621
1	562151	562361	RLOC_00000185	.	-	6.86	0.6191	0.06065	0.1527	0.4621
1	564215	564697	RLOC_00000186	.	+	278.20	0.4622	0.0007895	0.009458	0.02064
1	564697	564781	RLOC_00000186	.	+	10.17	0.2994	0.2829	0.4361	0.02064
1	565432	565711	RLOC_00000186	.	+	237.88	0.2135	0.009607	0.04512	0.02064
1	565783	565954	RLOC_00000186	.	+	179.33	-0.0473	0.394	0.5457	0.02064
1	566042	566141	RLOC_00000186	.	+	157.77	-0.0930	0.6362	0.7537	0.02064
1	566225	567741	RLOC_00000186	.	+	1178.86	-0.3173	0.001023	0.01105	0.02064
1	568831	568978	RLOC_00000187	.	+	9.89	0.8950	0.05005	0.1342	0.1431
1	569323	569699	RLOC_00000187	.	+	30.33	-0.5192	0.01101	0.04925	0.1431
1	569699	570109	RLOC_00000187	.	+	27.97	0.0355	0.9267	0.9559	0.1431
1	570109	570472	RLOC_00000187	.	+	22.40	0.3248	0.3011	0.4548	0.1431
1	571939	572759	RLOC_00000188	.	-	912.93	-0.4427	0.006659	0.03561	0.09856
1	572835	573252	RLOC_00000188	.	-	483.78	-0.0744	0.5297	0.6671	0.09856
1	573337	573397	RLOC_00000188	.	-	151.45	0.0083	0.7841	0.8623	0.09856
1	573488	573953	RLOC_00000188	.	-	470.67	0.1754	0.1014	0.2158	0.09856
1	574119	574966	RLOC_00000188	.	-	601.77	0.2837	0.009479	0.04472	0.09856
1	576870	576931	RLOC_00000189	.	+	5.10	0.4042	0.3651	0.5183	0.4841
1	576993	577438	RLOC_00000189	.	+	16.70	0.1226	0.7897	0.866	0.4841
1	577448	577499	RLOC_00000189	.	+	5.60	0.2670	0.7687	0.8515	0.4841
1	577537	577592	RLOC_00000189	.	+	5.36	-0.1962	0.7354	0.8276	0.4841
1	577840	577904	RLOC_00000189	.	+	8.11	-0.2842	0.5956	0.7214	0.4841
1	577978	578052	RLOC_00000189	.	+	8.25	0.0655	0.8205	0.8867	0.4841
1	578721	578775	RLOC_00000189	.	+	8.63	0.5501	0.5011	0.6421	0.4841
1	578960	579017	RLOC_00000189	.	+	9.57	0.0612	0.8725	0.9207	0.4841
1	579195	579312	RLOC_00000189	.	+	14.09	-0.5561	0.06552	0.1608	0.4841
1	579420	579525	RLOC_00000189	.	+	11.02	-0.3009	0.435	0.5836	0.4841
1	579646	579799	RLOC_00000189	.	+	19.52	0.1170	0.5758	0.7052	0.4841
1	579878	579967	RLOC_00000189	.	+	15.04	0.3356	0.3	0.4537	0.4841
1	580049	580130	RLOC_00000189	.	+	8.69	0.2124	0.5822	0.7106	0.4841
1	580226	580374	RLOC_00000189	.	+	8.65	-0.3125	0.5704	0.7009	0.4841
1	580662	580745	RLOC_00000190	.	+	67.05	0.1553	0.2912	0.4447	0.09382
1	581068	581186	RLOC_00000190	.	+	138.24	0.1806	0.03834	0.112	0.09382
1	581496	581556	RLOC_00000190	.	+	145.83	0.1453	0.08339	0.1893	0.09382
1	581638	581719	RLOC_00000190	.	+	178.38	-0.0542	0.7918	0.8675	0.09382
1	581813	582231	RLOC_00000190	.	+	278.79	-0.2850	0.006246	0.03417	0.09382
1	584297	584618	RLOC_00000192	.	+	49.76	0.4896	0.0276	0.08996	0.08594
1	584859	584956	RLOC_00000192	.	+	37.59	0.4172	0.03597	0.1073	0.08594
1	585052	585144	RLOC_00000192	.	+	33.72	0.4525	0.07628	0.1782	0.08594
1	585236	585368	RLOC_00000192	.	+	37.01	0.3011	0.166	0.3022	0.08594
1	585499	585685	RLOC_00000192	.	+	46.26	0.0890	0.7481	0.8371	0.08594
1	585778	585942	RLOC_00000192	.	+	62.48	-0.0761	0.7343	0.8268	0.08594
1	586022	586101	RLOC_00000192	.	+	46.34	-0.2301	0.6963	0.7987	0.08594
1	586191	586320	RLOC_00000192	.	+	64.09	-0.2228	0.601	0.7256	0.08594
1	586438	586566	RLOC_00000192	.	+	60.55	-0.0318	0.9063	0.9431	0.08594
1	586648	587201	RLOC_00000192	.	+	136.07	-0.3949	0.005544	0.03171	0.08594
1	588344	588540	RLOC_00000193	.	+	18.94	0.4646	0.2533	0.4041	0.06302
1	588662	589282	RLOC_00000193	.	+	41.57	0.6391	0.007698	0.03904	0.06302
1	589591	589977	RLOC_00000193	.	+	56.06	-0.4214	0.003676	0.02436	0.06302
1	589977	590093	RLOC_00000193	.	+	25.02	-0.0792	0.6611	0.7722	0.06302
1	590093	590154	RLOC_00000193	.	+	10.91	-0.7929	0.2618	0.4137	0.06302
1	591963	593229	RLOC_00000195	.	+	259.71	0.2709	0.02685	0.08839	0.2731
1	593865	594171	RLOC_00000195	.	+	97.19	-0.3419	0.03374	0.1028	0.2731
1	594616	596478	RLOC_00000196	.	-	367.90	-0.3755	0.004475	0.0276	0.07298
1	596571	597382	RLOC_00000196	.	-	159.82	0.1491	0.01732	0.06633	0.07298
1	597520	598575	RLOC_00000196	.	-	152.70	0.1505	0.02874	0.09237	0.07298
1	599369	599814	RLOC_00000197	.	-	117.17	-0.4930	0.04647	0.1275	0.03585
1	599891	599977	RLOC_00000197	.	-	98.54	-0.2537	0.1505	0.2824	0.03585
1	600064	600234	RLOC_00000197	.	-	112.49	-0.0692	0.8709	0.9197	0.03585
1	600433	600513	RLOC_00000197	.	-	73.94	0.0785	0.4887	0.6315	0.03585
1	600720	600825	RLOC_00000197	.	-	95.07	0.0040	0.8022	0.8744	0.03585
1	601226	601372	RLOC_00000197	.	-	93.61	-0.0312	0.9397	0.9638	0.03585
1	601652	601706	RLOC_00000197	.	-	40.07	0.6235	0.001717	0.01514	0.03585
1	601811	602148	RLOC_00000197	.	-	70.68	0.3790	0.01786	0.06763	0.03585
1	602526	602754	RLOC_00000198	.	+	101.22	0.1081	0.2124	0.3577	0.7145
1	602979	603125	RLOC_00000198	.	+	130.12	0.0943	0.1431	0.2731	0.7145
1	603600	603678	RLOC_00000198	.	+	102.50	-0.0534	0.8037	0.8755	0.7145
1	603774	604299	RLOC_00000198	.	+	249.66	-0.2523	0.1629	0.2983	0.7145
1	605081	605387	RLOC_00000200	.	-	19.13	0.4013	0.2043	0.3483	0.6259
1	605732	605805	RLOC_00000200	.	-	8.57	0.1986	0.5667	0.6979	0.6259
1	605918	606102	RLOC_00000200	.	-	12.35	0.2550	0.4804	0.6243	0.6259
1	606175	606322	RLOC_00000200	.	-	15.82	-0.3911	0.1064	0.2229	0.6259
1	606528	606653	RLOC_00000200	.	-	10.84	-0.2971	0.3508	0.5047	0.6259
1	607858	608147	RLOC_00000201	.	-	5904.84	-0.2639	0.05763	0.1474	0.04957
1	608240	608311	RLOC_00000201	.	-	6846.28	-0.2684	0.002666	0.01994	0.04957
1	608396	608712	RLOC_00000201	.	-	12527.05	-0.0117	0.1003	0.2141	0.04957
1	608812	608959	RLOC_00000201	.	-	7320.11	0.2963	0.006432	0.03483	0.04957
1	609023	609427	RLOC_00000201	.	-	6275.07	0.3453	0.003704	0.02447	0.04957
1	613358	613706	RLOC_00000203	.	-	40.68	0.0745	0.9155	0.9489	0.5116
1	613993	614157	RLOC_00000203	.	-	23.95	-0.0429	0.7957	0.87	0.5116
1	614239	614345	RLOC_00000203	.	-	15.65	-0.1307	0.9825	0.9897	0.5116
1	614988	615189	RLOC_00000203	.	-	15.54	-0.2939	0.5701	0.7006	0.5116
1	615276	615374	RLOC_00000203	.	-	8.15	1.1829	0.07233	0.1718	0.5116
1	615851	615924	RLOC_00000203	.	-	6.70	-0.4897	0.5594	0.6919	0.5116
1	618335	618921	RLOC_00000204	.	+	35.78	0.4937	0.124	0.2478	0.2314
1	618980	619274	RLOC_00000204	.	+	22.03	0.2749	0.6106	0.7335	0.2314
1	619274	619328	RLOC_00000204	.	+	10.93	0.6353	0.1266	0.2512	0.2314
1	619638	620076	RLOC_00000204	.	+	35.81	-0.2983	0.1117	0.2304	0.2314
1	620076	620428	RLOC_00000204	.	+	25.67	-0.6334	0.02117	0.0756	0.2314
1	623754	624140	RLOC_00000207	.	-	1676.08	-0.0820	0.2493	0.3997	0.8656
1	624230	624556	RLOC_00000207	.	-	1253.24	0.0851	0.2504	0.401	0.8656
1	626764	626828	RLOC_00000209	.	+	347.20	0.1724	0.06898	0.1665	0.2533
1	626910	627004	RLOC_00000209	.	+	638.67	0.1808	0.02414	0.08235	0.2533
1	627097	627165	RLOC_00000209	.	+	713.54	0.1726	0.04323	0.1214	0.2533
1	627301	627382	RLOC_00000209	.	+	569.11	0.2116	0.04206	0.1192	0.2533
1	627480	627614	RLOC_00000209	.	+	1235.64	0.0987	0.07095	0.1697	0.2533
1	627832	627893	RLOC_00000209	.	+	949.83	0.0147	0.5191	0.6578	0.2533
1	627968	628019	RLOC_00000209	.	+	800.31	-0.0040	0.7712	0.8532	0.2533
1	628110	628172	RLOC_00000209	.	+	694.26	-0.1159	0.1992	0.3422	0.2533
1	628244	628710	RLOC_00000209	.	+	1208.40	-0.1068	0.2333	0.3819	0.2533
1	628762	629323	RLOC_00000209	.	+	1072.81	-0.0485	0.9142	0.9482	0.2533
1	629417	629497	RLOC_00000209	.	+	814.03	-0.2952	0.05199	0.1376	0.2533
1	629578	629812	RLOC_00000209	.	+	817.25	-0.5403	0.08763	0.1956	0.2533
1	630512	630703	RLOC_00000210	.	+	134.46	0.4560	0.001312	0.01285	0.000146
1	630831	630896	RLOC_00000210	.	+	157.38	0.4141	0.00109	0.01149	0.000146
1	630977	631033	RLOC_00000210	.	+	168.02	0.3411	0.001766	0.0154	0.000146
1	631102	631180	RLOC_00000210	.	+	181.31	0.3984	8.19e-07	9.087e-05	0.000146
1	631264	631337	RLOC_00000210	.	+	181.71	0.3504	0.0005131	0.007249	0.000146
1	631429	631519	RLOC_00000210	.	+	179.26	0.1081	0.09157	0.2015	0.000146
1	631602	632043	RLOC_00000210	.	+	413.63	-0.1121	0.9407	0.9644	0.000146
1	632126	632348	RLOC_00000210	.	+	437.85	-0.2354	0.07476	0.1758	0.000146
1	632527	632807	RLOC_00000210	.	+	451.12	-0.3891	0.007379	0.03801	0.000146
1	632880	633252	RLOC_00000210	.	+	497.36	-0.6700	0.0004236	0.006455	0.000146
1	635138	635651	RLOC_00000211	.	+	223.10	0.4068	0.0074	0.03808	0.1066
1	635736	635986	RLOC_00000211	.	+	256.88	0.1769	0.1397	0.2686	0.1066
1	636080	636745	RLOC_00000211	.	+	485.96	-0.1035	0.096	0.208	0.1066
1	636826	637261	RLOC_00000211	.	+	290.91	-0.3635	0.071	0.1697	0.1066
1	637288	637514	RLOC_00000213	.	-	164.81	-0.1183	0.2685	0.4209	0.883
1	637601	637724	RLOC_00000213	.	-	200.17	0.0246	0.9199	0.9517	0.883
1	638257	638648	RLOC_00000213	.	-	247.07	0.0904	0.408	0.5588	0.883
1	641583	641922	RLOC_00000216	.	+	19.19	-0.3061	0.01396	0.05757	0.1711
1	642011	642061	RLOC_00000216	.	+	5.51	0.8496	0.02942	0.09385	0.1711
1	642879	643208	RLOC_00000217	.	-	157.11	-0.1555	0.2213	0.368	0.8347
1	643303	643554	RLOC_00000217	.	-	140.00	0.0632	0.4988	0.6401	0.8347
1	643643	643745	RLOC_00000217	.	-	79.33	0.1072	0.5243	0.6626	0.8347
1	643876	643949	RLOC_00000217	.	-	77.82	0.0346	0.6539	0.767	0.8347
1	644140	644261	RLOC_00000217	.	-	84.03	-0.0676	0.7852	0.863	0.8347
1	644349	644530	RLOC_00000217	.	-	69.47	0.0160	0.8628	0.9143	0.8347
1	645149	645487	RLOC_00000218	.	-	333.65	-0.8207	0.0002225	0.004347	0.005237
1	645572	645679	RLOC_00000218	.	-	392.03	-0.6583	0.0001152	0.002863	0.005237
1	645754	645816	RLOC_00000218	.	-	303.96	-0.4320	0.01167	0.05121	0.005237
1	645898	646038	RLOC_00000218	.	-	410.17	-0.4853	0.007902	0.03974	0.005237
1	646125	646312	RLOC_00000218	.	-	503.12	-0.4875	0.0006858	0.008689	0.005237
1	646405	646491	RLOC_00000218	.	-	337.99	-0.3985	0.008921	0.04302	0.005237
1	646566	646689	RLOC_00000218	.	-	324.20	-0.1864	0.2651	0.4172	0.005237
1	646776	646956	RLOC_00000218	.	-	313.90	-0.0233	0.6643	0.7745	0.005237
1	647037	647107	RLOC_00000218	.	-	216.94	0.1190	0.1319	0.2584	0.005237
1	647183	647280	RLOC_00000218	.	-	210.68	0.0808	0.1373	0.2655	0.005237
1	647366	647442	RLOC_00000218	.	-	229.14	0.0336	0.2833	0.4365	0.005237
1	647529	647620	RLOC_00000218	.	-	248.55	0.0239	0.2284	0.3762	0.005237
1	647702	647807	RLOC_00000218	.	-	239.84	0.0567	0.1288	0.2542	0.005237
1	647922	647995	RLOC_00000218	.	-	185.33	0.1182	0.09595	0.2079	0.005237
1	648101	648275	RLOC_00000218	.	-	246.97	0.1275	0.07115	0.1699	0.005237
1	648361	648433	RLOC_00000218	.	-	146.50	0.1628	0.02167	0.07676	0.005237
1	648507	648656	RLOC_00000218	.	-	158.53	0.1795	0.007337	0.03788	0.005237
1	648765	648829	RLOC_00000218	.	-	110.98	0.2654	0.01926	0.07093	0.005237
1	648910	649139	RLOC_00000218	.	-	245.59	0.3088	0.003607	0.02409	0.005237
1	649367	649459	RLOC_00000218	.	-	162.15	0.3541	0.003807	0.02493	0.005237
1	649550	649675	RLOC_00000218	.	-	166.18	0.3725	0.02204	0.0776	0.005237
1	649761	650438	RLOC_00000218	.	-	432.52	0.3479	0.001772	0.01543	0.005237
1	650562	650709	RLOC_00000218	.	-	146.58	0.3797	0.01245	0.05332	0.005237
1	650790	650906	RLOC_00000218	.	-	110.61	0.3784	0.008236	0.04088	0.005237
1	651127	651219	RLOC_00000218	.	-	114.92	0.3116	0.02073	0.07455	0.005237
1	651319	651539	RLOC_00000218	.	-	194.37	0.4174	0.005654	0.03212	0.005237
1	651710	651909	RLOC_00000218	.	-	112.37	0.4866	0.00157	0.01435	0.005237
1	655567	655823	RLOC_00000220	.	-	471.54	-0.4895	0.06149	0.1541	0.1173
1	655931	656505	RLOC_00000220	.	-	991.69	-0.2090	0.01037	0.04734	0.1173
1	656586	656757	RLOC_00000220	.	-	482.34	0.0639	0.2018	0.3453	0.1173
1	656811	657060	RLOC_00000220	.	-	593.01	0.0728	0.2328	0.3813	0.1173
1	657140	657281	RLOC_00000220	.	-	343.49	0.1467	0.2642	0.4162	0.1173
1	657390	657496	RLOC_00000220	.	-	235.55	0.4252	0.008408	0.04142	0.1173
1	657854	658135	RLOC_00000220	.	-	419.08	0.1468	0.1206	0.2431	0.1173
1	658722	659316	RLOC_00000221	.	-	308.34	-0.2633	0.05531	0.1434	0.4367
1	659555	659762	RLOC_00000221	.	-	116.20	0.3174	0.06526	0.1604	0.4367
1	661206	661790	RLOC_00000222	.	-	298.93	-0.2123	0.0148	0.05985	0.1785
1	662041	662258	RLOC_00000222	.	-	135.91	0.2705	0.01849	0.06913	0.1785
1	665214	665777	RLOC_00000224	.	-	129.93	-0.0724	0.6272	0.7467	0.9328
1	666113	666256	RLOC_00000224	.	-	47.33	0.1963	0.3467	0.5007	0.9328
1	666350	666423	RLOC_00000224	.	-	20.23	-0.2414	0.6147	0.7369	0.9328
1	666892	667068	RLOC_00000226	.	-	87.49	-0.4705	0.007256	0.03764	0.05009
1	667150	667642	RLOC_00000226	.	-	304.07	-0.3619	0.008255	0.04094	0.05009
1	667734	667868	RLOC_00000226	.	-	136.45	-0.0490	0.8606	0.9128	0.05009
1	667956	668082	RLOC_00000226	.	-	112.99	-0.1986	0.3782	0.5306	0.05009
1	668172	668468	RLOC_00000226	.	-	161.38	-0.1071	0.3966	0.5481	0.05009
1	668612	668745	RLOC_00000226	.	-	87.26	0.5142	0.004358	0.02714	0.05009
1	668855	668987	RLOC_00000226	.	-	99.50	0.5630	0.002703	0.0201	0.05009
1	669078	669134	RLOC_00000226	.	-	84.88	0.5907	0.006414	0.03478	0.05009
1	669460	669513	RLOC_00000226	.	-	67.09	0.3111	0.09807	0.2109	0.05009
1	669619	669749	RLOC_00000226	.	-	52.07	0.0548	0.6351	0.7527	0.05009
1	669749	669824	RLOC_00000226	.	-	38.97	0.1270	0.5339	0.6707	0.05009
1	673444	673706	RLOC_00000228	.	+	12.49	0.2781	0.2083	0.3529	0.1131
1	673963	674024	RLOC_00000228	.	+	10.20	0.3689	0.1338	0.261	0.1131
1	674098	674165	RLOC_00000228	.	+	9.18	0.0737	0.5737	0.7036	0.1131
1	674440	674544	RLOC_00000228	.	+	11.07	0.5662	0.07691	0.1792	0.1131
1	674544	674704	RLOC_00000228	.	+	14.48	0.5645	0.2688	0.4212	0.1131
1	674812	674880	RLOC_00000228	.	+	6.83	1.0579	0.05354	0.1404	0.1131
1	675359	675494	RLOC_00000228	.	+	13.46	0.0485	0.8361	0.897	0.1131
1	675630	675945	RLOC_00000228	.	+	27.35	-0.7578	0.008004	0.04008	0.1131
1	676043	676118	RLOC_00000228	.	+	10.83	-0.8857	0.07681	0.179	0.1131
1	676208	676318	RLOC_00000228	.	+	3.76	-1.4489	0.04631	0.1273	0.1131
1	681408	681921	RLOC_00000230	.	-	226.01	-0.7929	0.0008584	0.009932	0.02186
1	682242	682404	RLOC_00000230	.	-	135.64	-0.6085	0.0008603	0.009949	0.02186
1	682731	682892	RLOC_00000230	.	-	111.90	-0.3831	0.004615	0.02815	0.02186
1	683174	683317	RLOC_00000230	.	-	90.03	-0.1365	0.4081	0.5589	0.02186
1	683401	684777	RLOC_00000230	.	-	399.50	0.0762	0.1599	0.2946	0.02186
1	684863	685607	RLOC_00000230	.	-	191.36	0.2167	0.04057	0.1163	0.02186
1	685607	685965	RLOC_00000230	.	-	93.46	0.6790	0.006373	0.03463	0.02186
1	686055	686424	RLOC_00000230	.	-	84.05	0.7759	0.004137	0.02628	0.02186
1	686504	686605	RLOC_00000230	.	-	41.33	0.7956	0.002976	0.02132	0.02186
1	686678	686751	RLOC_00000230	.	-	35.36	0.6441	0.01025	0.04701	0.02186
1	686843	687309	RLOC_00000230	.	-	53.93	0.7382	0.00427	0.02681	0.02186
1	687864	688148	RLOC_00000231	.	-	178.97	-0.3979	0.02269	0.07907	0.02231
1	688280	688364	RLOC_00000231	.	-	186.07	-0.2957	0.06926	0.167	0.02231
1	688457	688603	RLOC_00000231	.	-	170.83	-0.2473	0.02305	0.07986	0.02231
1	688677	688952	RLOC_00000231	.	-	220.17	-0.2803	0.004933	0.02943	0.02231
1	689034	689158	RLOC_00000231	.	-	196.85	-0.2419	0.05122	0.1363	0.02231
1	689239	689409	RLOC_00000231	.	-	194.76	-0.1848	0.02237	0.07833	0.02231
1	689531	689813	RLOC_00000231	.	-	221.65	0.0325	0.9356	0.9612	0.02231
1	689975	690173	RLOC_00000231	.	-	140.04	0.2409	0.07664	0.1788	0.02231
1	690173	690398	RLOC_00000231	.	-	9.29	1.0261	0.02386	0.08172	0.02231
1	690398	690579	RLOC_00000231	.	-	105.05	0.3742	0.02189	0.07727	0.02231
1	690748	690898	RLOC_00000231	.	-	89.29	0.3977	0.02396	0.08196	0.02231
1	691120	691364	RLOC_00000231	.	-	94.96	0.5832	0.0008817	0.01011	0.02231
1	691442	692078	RLOC_00000231	.	-	217.13	0.5067	0.008079	0.04034	0.02231
1	692174	692578	RLOC_00000231	.	-	135.90	0.5860	0.01007	0.04646	0.02231
1	701486	701681	RLOC_00000234	.	+	70.35	0.0511	0.8154	0.8833	0.1898
1	701774	701875	RLOC_00000234	.	+	86.68	0.2891	0.1906	0.3322	0.1898
1	702105	702183	RLOC_00000234	.	+	106.62	0.2968	0.05787	0.1479	0.1898
1	702275	702468	RLOC_00000234	.	+	166.63	0.1707	0.1226	0.2459	0.1898
1	702677	702737	RLOC_00000234	.	+	83.68	-0.0466	0.7498	0.8383	0.1898
1	702827	702901	RLOC_00000234	.	+	74.91	0.0498	0.8119	0.8812	0.1898
1	703011	703098	RLOC_00000234	.	+	101.94	-0.1010	0.6475	0.7622	0.1898
1	703194	703256	RLOC_00000234	.	+	103.67	-0.1233	0.4388	0.587	0.1898
1	703352	703818	RLOC_00000234	.	+	194.56	-0.4767	0.0161	0.06325	0.1898
1	703907	704495	RLOC_00000235	.	-	700.68	-0.6017	0.001453	0.01366	0.003088
1	704495	704586	RLOC_00000235	.	-	9.94	-0.1839	0.6264	0.746	0.003088
1	704586	704669	RLOC_00000235	.	-	186.89	-0.1169	0.8601	0.9126	0.003088
1	704917	704991	RLOC_00000235	.	-	3.00	-13.3000	5.316e-05	0.001767	0.003088
1	705062	705129	RLOC_00000235	.	-	175.41	-0.0174	0.3354	0.4895	0.003088
1	705301	705367	RLOC_00000235	.	-	179.27	0.1109	0.07702	0.1794	0.003088
1	705533	705656	RLOC_00000235	.	-	227.13	0.1383	0.009689	0.04536	0.003088
1	705656	705873	RLOC_00000235	.	-	14.24	-0.4870	0.3702	0.5231	0.003088
1	705912	706618	RLOC_00000235	.	-	398.94	0.3297	0.0002731	0.004904	0.003088
1	709976	710136	RLOC_00000237	.	-	76.67	-0.2942	0.0989	0.2121	0.2703
1	710239	710333	RLOC_00000237	.	-	98.78	-0.1581	0.2789	0.4318	0.2703
1	710694	710801	RLOC_00000237	.	-	109.04	-0.0850	0.4041	0.5551	0.2703
1	710801	710954	RLOC_00000237	.	-	19.55	0.9544	0.02646	0.08754	0.2703
1	710954	711018	RLOC_00000237	.	-	83.12	-0.0684	0.6449	0.7604	0.2703
1	711079	711184	RLOC_00000237	.	-	85.29	0.0014	0.9079	0.944	0.2703
1	711262	711409	RLOC_00000237	.	-	105.60	0.1530	0.2126	0.3579	0.2703
1	711504	711826	RLOC_00000237	.	-	138.64	0.1412	0.2057	0.3499	0.2703
1	712493	714206	RLOC_00000238	.	-	618.70	-0.8830	6.372e-06	0.0004183	0.0006751
1	714316	714463	RLOC_00000238	.	-	53.98	-0.0755	0.463	0.6086	0.0006751
1	714557	714864	RLOC_00000238	.	-	87.81	-0.2423	0.7984	0.872	0.0006751
1	715006	715315	RLOC_00000238	.	-	112.86	-0.4516	0.0636	0.1577	0.0006751
1	715659	716043	RLOC_00000238	.	-	107.47	-0.2671	0.6687	0.778	0.0006751
1	716043	717616	RLOC_00000238	.	-	237.89	-0.1799	0.4138	0.5641	0.0006751
1	717616	717759	RLOC_00000238	.	-	37.87	-0.1915	0.5134	0.6529	0.0006751
1	717759	718193	RLOC_00000238	.	-	66.56	-0.0262	0.134	0.2612	0.0006751
1	718193	718662	RLOC_00000238	.	-	58.78	0.4021	0.006561	0.03525	0.0006751
1	718934	719572	RLOC_00000238	.	-	84.10	0.3107	0.002422	0.01876	0.0006751
1	719572	720332	RLOC_00000238	.	-	92.94	0.3469	0.004447	0.0275	0.0006751
1	720332	720585	RLOC_00000238	.	-	55.82	-0.0694	0.1969	0.3395	0.0006751
1	720680	721090	RLOC_00000238	.	-	55.51	-0.2738	0.3411	0.4951	0.0006751
1	721090	721212	RLOC_00000238	.	-	24.59	0.0811	0.04332	0.1216	0.0006751
1	721212	721795	RLOC_00000238	.	-	68.62	0.2677	0.00226	0.01796	0.0006751
1	721904	722007	RLOC_00000238	.	-	22.95	0.2316	0.1211	0.2437	0.0006751
1	722115	722562	RLOC_00000238	.	-	44.65	0.6220	0.008948	0.04311	0.0006751
1	722562	722815	RLOC_00000238	.	-	26.65	0.4408	0.003807	0.02493	0.0006751
1	722965	723548	RLOC_00000238	.	-	49.52	0.4214	0.002485	0.01906	0.0006751
1	723548	723600	RLOC_00000238	.	-	16.33	0.5708	0.01538	0.06145	0.0006751
1	723600	723730	RLOC_00000238	.	-	20.40	0.2107	0.05799	0.1481	0.0006751
1	723730	724119	RLOC_00000238	.	-	42.63	0.3068	0.00626	0.03423	0.0006751
1	724274	724389	RLOC_00000238	.	-	20.01	-0.0349	0.1138	0.2334	0.0006751
1	724680	724746	RLOC_00000238	.	-	15.79	0.0476	0.2249	0.3721	0.0006751
1	724889	725081	RLOC_00000238	.	-	20.92	-0.1223	0.1719	0.3096	0.0006751
1	725235	725409	RLOC_00000238	.	-	19.26	0.6179	0.004039	0.02586	0.0006751
1	725551	725608	RLOC_00000238	.	-	15.15	1.5660	2.265e-05	0.001008	0.0006751
1	725688	725824	RLOC_00000238	.	-	18.13	0.8629	0.003622	0.02414	0.0006751
1	726036	726122	RLOC_00000238	.	-	17.91	0.6724	0.007787	0.03934	0.0006751
1	726274	726344	RLOC_00000238	.	-	14.65	0.8313	0.01246	0.05337	0.0006751
1	726709	727150	RLOC_00000238	.	-	30.66	0.8840	0.0002068	0.004138	0.0006751
1	727277	727337	RLOC_00000238	.	-	5.88	-0.7794	0.4875	0.6304	0.0006751
1	730082	730139	RLOC_00000239	.	+	4.13	1.2819	0.01945	0.07139	0.2177
1	730139	730415	RLOC_00000239	.	+	28.54	0.3138	0.1193	0.2413	0.2177
1	730496	730610	RLOC_00000239	.	+	18.04	-0.0457	0.8066	0.8776	0.2177
1	730915	731073	RLOC_00000239	.	+	24.49	-0.1506	0.7043	0.8047	0.2177
1	731175	731488	RLOC_00000239	.	+	32.47	-0.6248	0.1534	0.2863	0.2177
1	731677	732741	RLOC_00000240	.	-	796.04	-0.9812	0.0002275	0.004401	0.003498
1	732927	737081	RLOC_00000240	.	-	1447.42	-0.0511	0.004018	0.02578	0.003498
1	737232	737437	RLOC_00000240	.	-	83.58	0.7257	0.01056	0.04788	0.003498
1	737561	737624	RLOC_00000240	.	-	44.17	0.8507	6.308e-05	0.001979	0.003498
1	737873	738001	RLOC_00000240	.	-	34.75	0.5340	0.002793	0.02051	0.003498
1	739689	740051	RLOC_00000241	.	+	400.58	0.2461	0.03019	0.09546	0.008551
1	740121	740245	RLOC_00000241	.	+	216.35	0.3784	0.001923	0.0162	0.008551
1	740353	740521	RLOC_00000241	.	+	216.96	0.4135	0.0002296	0.004422	0.008551
1	740594	740757	RLOC_00000241	.	+	358.24	0.1439	0.05094	0.1358	0.008551
1	740967	741806	RLOC_00000241	.	+	812.88	0.2393	0.000462	0.006796	0.008551
1	741944	742052	RLOC_00000241	.	+	447.19	0.0621	0.2779	0.4308	0.008551
1	742156	742319	RLOC_00000241	.	+	568.61	0.0012	0.4584	0.6046	0.008551
1	742498	742740	RLOC_00000241	.	+	714.13	-0.0043	0.6283	0.7475	0.008551
1	742820	743204	RLOC_00000241	.	+	790.76	-0.2392	0.01225	0.05281	0.008551
1	743298	743546	RLOC_00000241	.	+	823.56	-0.3625	0.0006824	0.008662	0.008551
1	743617	744139	RLOC_00000241	.	+	619.61	-0.6392	0.007151	0.03729	0.008551
1	743952	744033	RLOC_00000243	.	-	7.24	-1.1826	0.02912	0.0932	0.002624
1	744033	744935	RLOC_00000243	.	-	55.49	-0.6300	0.007442	0.03821	0.002624
1	744935	745410	RLOC_00000243	.	-	31.06	0.1346	0.4026	0.5537	0.002624
1	745463	745537	RLOC_00000243	.	-	8.65	0.2888	0.3801	0.5323	0.002624
1	745818	745915	RLOC_00000243	.	-	8.57	0.1444	0.5067	0.647	0.002624
1	745915	746532	RLOC_00000243	.	-	19.47	0.9355	4.217e-05	0.001516	0.002624
1	748147	748694	RLOC_00000245	.	-	29.40	-0.0996	0.4585	0.6047	0.9758
1	748694	748842	RLOC_00000245	.	-	11.75	0.1743	0.5063	0.6467	0.9758
1	749315	749495	RLOC_00000246	.	+	45.91	-0.0754	0.8828	0.9275	0.3171
1	749784	749949	RLOC_00000246	.	+	70.65	-0.3091	0.2929	0.4465	0.3171
1	750117	750298	RLOC_00000246	.	+	60.67	0.0388	0.5147	0.654	0.3171
1	750415	750472	RLOC_00000246	.	+	43.09	0.4017	0.03351	0.1023	0.3171
1	750556	750627	RLOC_00000246	.	+	37.69	0.3289	0.1113	0.2299	0.3171
1	750795	750874	RLOC_00000246	.	+	48.36	0.2076	0.1363	0.2642	0.3171
1	750956	751016	RLOC_00000246	.	+	40.11	0.0725	0.5278	0.6655	0.3171
1	751119	751223	RLOC_00000246	.	+	59.35	-0.1414	0.6708	0.7796	0.3171
1	751296	751357	RLOC_00000246	.	+	48.38	-0.0470	0.8203	0.8865	0.3171
1	751427	751886	RLOC_00000246	.	+	112.24	-0.4662	0.09783	0.2106	0.3171
1	752272	752660	RLOC_00000247	.	+	22.96	0.1233	0.3916	0.5434	0.9523
1	752981	753140	RLOC_00000247	.	+	19.39	-0.1363	0.398	0.5494	0.9523
1	753277	754238	RLOC_00000248	.	-	44740.63	0.2800	8.48e-06	0.000517	0.0008399
1	754315	754892	RLOC_00000248	.	-	765.69	-0.2498	2.368e-05	0.001039	0.0008399
1	755088	755222	RLOC_00000248	.	-	6.35	-0.6251	0.08013	0.1842	0.0008399
1	755379	756281	RLOC_00000248	.	-	1173.29	-0.1269	0.0002311	0.004435	0.0008399
1	754443	754536	RLOC_00000249	.	+	17.90	0.6013	0.4729	0.6175	8.115e-05
1	754536	754926	RLOC_00000249	.	+	44.20	0.3513	0.7117	0.8101	8.115e-05
1	754926	754986	RLOC_00000249	.	+	9.35	1.3504	0.008278	0.04102	8.115e-05
1	755175	755227	RLOC_00000249	.	+	7.45	2.4255	0.00422	0.02661	8.115e-05
1	755368	756538	RLOC_00000249	.	+	679.09	1.0322	3.902e-07	5.05e-05	8.115e-05
1	756644	756735	RLOC_00000249	.	+	299.76	0.0503	0.3608	0.5142	8.115e-05
1	757553	757686	RLOC_00000249	.	+	367.44	-0.0456	0.005694	0.03225	8.115e-05
1	757936	758006	RLOC_00000249	.	+	279.51	-0.1874	0.01642	0.06405	8.115e-05
1	758196	758259	RLOC_00000249	.	+	302.94	-0.3719	0.008113	0.04046	8.115e-05
1	758347	758643	RLOC_00000249	.	+	398.97	-0.4374	0.001573	0.01436	8.115e-05
1	761291	761810	RLOC_00000251	.	+	291.74	0.4149	0.007018	0.03683	0.01673
1	761885	762414	RLOC_00000251	.	+	312.96	0.4775	0.0005937	0.007941	0.01673
1	762508	762628	RLOC_00000251	.	+	107.87	0.3371	0.005738	0.03242	0.01673
1	763012	763210	RLOC_00000251	.	+	152.73	0.3252	0.003386	0.02313	0.01673
1	763298	763430	RLOC_00000251	.	+	137.93	-0.0674	0.9684	0.9812	0.01673
1	763558	763719	RLOC_00000251	.	+	7.14	0.3703	0.4488	0.596	0.01673
1	763822	763913	RLOC_00000251	.	+	2.69	1.0011	0.1407	0.2698	0.01673
1	763979	764066	RLOC_00000251	.	+	129.50	-0.1811	0.375	0.5275	0.01673
1	764156	764597	RLOC_00000251	.	+	336.42	0.0549	0.1275	0.2525	0.01673
1	764698	764867	RLOC_00000251	.	+	235.94	-0.0118	0.6511	0.7648	0.01673
1	765024	765255	RLOC_00000251	.	+	360.90	-0.2135	0.2257	0.3731	0.01673
1	765483	765602	RLOC_00000251	.	+	298.31	-0.5446	0.003622	0.02414	0.01673
1	765751	766172	RLOC_00000251	.	+	473.80	-0.6129	0.0009782	0.01077	0.01673
1	767256	767469	RLOC_00000251	.	+	8.83	0.1330	0.6123	0.7349	0.01673
1	773439	773691	RLOC_00000254	.	+	16.69	0.2746	0.2754	0.4282	0.886
1	774095	774153	RLOC_00000254	.	+	15.42	0.0085	0.926	0.9555	0.886
1	774230	774539	RLOC_00000254	.	+	36.94	0.1973	0.4501	0.5972	0.886
1	774784	774879	RLOC_00000254	.	+	25.79	-0.0419	0.9678	0.9809	0.886
1	774967	775047	RLOC_00000254	.	+	23.21	-0.4147	0.2719	0.4246	0.886
1	775121	775296	RLOC_00000254	.	+	23.12	-0.1419	0.6914	0.7949	0.886
1	775539	775649	RLOC_00000255	.	+	15.38	0.4650	0.2779	0.4308	0.09802
1	775807	776355	RLOC_00000255	.	+	67.88	0.1664	0.5222	0.6606	0.09802
1	776481	776762	RLOC_00000255	.	+	46.63	0.3408	0.1174	0.2385	0.09802
1	777150	777237	RLOC_00000255	.	+	35.02	0.0283	0.8713	0.9199	0.09802
1	777335	777739	RLOC_00000255	.	+	78.90	0.2252	0.3048	0.4586	0.09802
1	777871	778065	RLOC_00000255	.	+	38.79	0.3402	0.08531	0.1922	0.09802
1	778152	778333	RLOC_00000255	.	+	38.25	0.0271	0.8825	0.9272	0.09802
1	778485	778610	RLOC_00000255	.	+	35.18	-0.0732	0.9073	0.9436	0.09802
1	778806	778896	RLOC_00000255	.	+	39.59	0.0377	0.7446	0.8343	0.09802
1	779001	779080	RLOC_00000255	.	+	41.67	0.0539	0.6781	0.7851	0.09802
1	779173	779250	RLOC_00000255	.	+	55.59	-0.0097	0.9185	0.9508	0.09802
1	779537	779646	RLOC_00000255	.	+	72.13	-0.3500	0.06876	0.1661	0.09802
1	779743	779989	RLOC_00000255	.	+	73.09	-0.5865	0.006611	0.03543	0.09802
1	780659	780762	RLOC_00000257	.	+	20.82	1.2144	0.001596	0.0145	0.034
1	780762	780836	RLOC_00000257	.	+	34.64	0.5958	0.0679	0.1647	0.034
1	781080	781177	RLOC_00000257	.	+	35.81	0.5785	0.04978	0.1338	0.034
1	782925	783596	RLOC_00000257	.	+	163.14	0.0221	0.8823	0.9271	0.034
1	783596	783680	RLOC_00000257	.	+	12.83	0.5513	0.1753	0.3137	0.034
1	783680	783842	RLOC_00000257	.	+	101.05	-0.2044	0.2339	0.3825	0.034
1	783942	784026	RLOC_00000257	.	+	76.61	-0.3952	0.0868	0.1944	0.034
1	784132	784308	RLOC_00000257	.	+	65.74	-0.5033	0.02886	0.09263	0.034
1	787070	787134	RLOC_00000258	.	+	6.93	0.6741	0.04054	0.1163	0.3599
1	787134	788611	RLOC_00000258	.	+	3143.51	-0.4715	0.04503	0.1248	0.3599
1	793352	793731	RLOC_00000261	.	-	452.42	-0.3198	0.04512	0.1249	0.006856
1	793828	793931	RLOC_00000261	.	-	223.75	0.1112	0.1804	0.3199	0.006856
1	794021	794219	RLOC_00000261	.	-	258.74	0.0774	0.3839	0.5361	0.006856
1	794326	794410	RLOC_00000261	.	-	150.90	0.1981	0.2141	0.3597	0.006856
1	794541	794650	RLOC_00000261	.	-	213.94	0.1126	0.3041	0.4579	0.006856
1	794898	794983	RLOC_00000261	.	-	179.90	0.0610	0.5521	0.6856	0.006856
1	795100	795349	RLOC_00000261	.	-	209.22	0.2969	0.02117	0.0756	0.006856
1	795568	795856	RLOC_00000261	.	-	103.08	-0.5602	0.0001685	0.003655	0.006856
1	796535	796631	RLOC_00000261	.	-	62.66	-0.2272	0.2314	0.3796	0.006856
1	796775	796893	RLOC_00000261	.	-	66.77	-0.3058	0.0665	0.1624	0.006856
1	797040	797127	RLOC_00000261	.	-	63.04	-0.1252	0.6643	0.7745	0.006856
1	797312	797411	RLOC_00000261	.	-	59.59	0.0606	0.7358	0.8279	0.006856
1	797545	797600	RLOC_00000261	.	-	48.39	0.2247	0.3798	0.5321	0.006856
1	797727	797789	RLOC_00000261	.	-	48.31	0.2636	0.2752	0.428	0.006856
1	798000	798441	RLOC_00000261	.	-	99.09	-0.0120	0.9782	0.9871	0.006856
1	799185	799431	RLOC_00000262	.	+	16.46	0.3443	0.2696	0.4221	0.6371
1	799640	799717	RLOC_00000262	.	+	8.72	0.5046	0.1294	0.255	0.6371
1	799826	799910	RLOC_00000262	.	+	8.94	0.1718	0.5703	0.7008	0.6371
1	799998	800112	RLOC_00000262	.	+	13.50	0.1187	0.5847	0.7126	0.6371
1	800381	800465	RLOC_00000262	.	+	13.53	0.2414	0.3375	0.4916	0.6371
1	800971	801039	RLOC_00000262	.	+	13.54	-0.0939	0.8444	0.9023	0.6371
1	801184	801272	RLOC_00000262	.	+	16.85	-0.2071	0.4643	0.6099	0.6371
1	801355	801429	RLOC_00000262	.	+	14.30	0.0466	0.8504	0.9061	0.6371
1	801516	801889	RLOC_00000262	.	+	29.01	0.0491	0.9515	0.9709	0.6371
1	802162	802223	RLOC_00000262	.	+	14.46	-0.2234	0.4137	0.564	0.6371
1	802319	802531	RLOC_00000262	.	+	20.83	-0.4917	0.1104	0.2286	0.6371
1	803042	803117	RLOC_00000263	.	+	79.54	0.4440	0.005118	0.03013	0.006588
1	803261	803343	RLOC_00000263	.	+	5.06	1.3342	0.02901	0.09295	0.006588
1	803563	803687	RLOC_00000263	.	+	175.83	0.2551	0.0009513	0.01058	0.006588
1	803834	803958	RLOC_00000263	.	+	191.35	0.1638	0.03742	0.1102	0.006588
1	804246	804367	RLOC_00000263	.	+	213.99	0.2607	0.006905	0.03644	0.006588
1	804736	804852	RLOC_00000263	.	+	228.58	0.1702	0.03463	0.1046	0.006588
1	804960	805070	RLOC_00000263	.	+	197.84	0.0651	0.1951	0.3374	0.006588
1	805166	805350	RLOC_00000263	.	+	247.23	0.1427	0.02465	0.08351	0.006588
1	805455	805653	RLOC_00000263	.	+	292.30	0.0050	0.2808	0.4338	0.006588
1	805859	806088	RLOC_00000263	.	+	439.12	-0.1682	0.3972	0.5486	0.006588
1	806193	806409	RLOC_00000263	.	+	495.22	-0.5158	0.0001592	0.003525	0.006588
1	806659	807021	RLOC_00000263	.	+	431.97	-0.6463	0.009914	0.046	0.006588
1	807391	807631	RLOC_00000264	.	+	79.45	0.2322	0.3148	0.4689	0.1634
1	807950	808017	RLOC_00000264	.	+	87.30	0.2952	0.06543	0.1607	0.1634
1	808227	808394	RLOC_00000264	.	+	145.91	0.3877	0.02633	0.08724	0.1634
1	808531	809214	RLOC_00000264	.	+	405.56	0.2358	0.01809	0.06817	0.1634
1	809407	809582	RLOC_00000264	.	+	231.42	-0.0750	0.3229	0.4769	0.1634
1	809671	809788	RLOC_00000264	.	+	252.73	-0.0313	0.7174	0.8142	0.1634
1	809910	810090	RLOC_00000264	.	+	310.85	-0.1403	0.05686	0.1461	0.1634
1	810379	810860	RLOC_00000264	.	+	356.28	-0.3497	0.01311	0.05525	0.1634
1	813462	813517	RLOC_00000266	.	+	37.53	0.8474	0.0006131	0.008101	0.0005303
1	813517	813604	RLOC_00000266	.	+	81.79	0.3044	3.915e-05	0.001448	0.0005303
1	813753	813928	RLOC_00000266	.	+	4.64	0.4398	0.08429	0.1907	0.0005303
1	813928	816716	RLOC_00000266	.	+	1751.83	-0.5434	4.505e-06	0.00033	0.0005303
1	818003	818281	RLOC_00000269	.	-	499.70	-0.1195	0.6367	0.754	0.988
1	818919	819078	RLOC_00000269	.	-	583.65	0.0109	0.9357	0.9613	0.988
1	819294	819403	RLOC_00000269	.	-	331.64	0.0703	0.5069	0.6472	0.988
1	819727	819783	RLOC_00000270	.	+	8.70	0.5131	0.1502	0.2822	0.7283
1	819896	820077	RLOC_00000270	.	+	22.03	-0.1666	0.8686	0.9181	0.7283
1	820158	820501	RLOC_00000270	.	+	35.13	0.0522	0.4832	0.6267	0.7283
1	820594	820666	RLOC_00000270	.	+	21.65	0.1790	0.3333	0.4875	0.7283
1	820737	821340	RLOC_00000270	.	+	75.49	-0.2183	0.2447	0.3945	0.7283
1	824557	824813	RLOC_00000272	.	+	78.64	-0.0070	0.9817	0.9893	0.04906
1	824890	824992	RLOC_00000272	.	+	63.01	0.3839	0.0106	0.04802	0.04906
1	825252	825342	RLOC_00000272	.	+	52.55	0.4534	0.01066	0.04817	0.04906
1	825421	825487	RLOC_00000272	.	+	55.39	0.0479	0.4241	0.5735	0.04906
1	825586	825655	RLOC_00000272	.	+	52.18	-0.1076	0.951	0.9706	0.04906
1	825744	826289	RLOC_00000272	.	+	183.97	-0.5524	0.002628	0.01975	0.04906
1	826591	826737	RLOC_00000273	.	+	45.54	0.6955	0.004917	0.02938	0.005912
1	827178	827913	RLOC_00000273	.	+	177.80	0.5002	0.002116	0.01721	0.005912
1	827913	829182	RLOC_00000273	.	+	410.83	0.0130	0.2199	0.3664	0.005912
1	829441	829512	RLOC_00000273	.	+	4.09	-1.1595	0.4067	0.5576	0.005912
1	829719	830319	RLOC_00000273	.	+	250.15	-0.6962	0.0001366	0.003193	0.005912
1	830616	831259	RLOC_00000274	.	+	72.48	0.4454	0.05189	0.1375	0.0001715
1	831259	831313	RLOC_00000274	.	+	18.25	0.7956	0.04215	0.1194	0.0001715
1	831419	832640	RLOC_00000274	.	+	144.58	0.4021	0.01267	0.05402	0.0001715
1	832752	832935	RLOC_00000274	.	+	51.99	0.1790	0.346	0.5	0.0001715
1	833083	833367	RLOC_00000274	.	+	74.03	0.1118	0.5634	0.6951	0.0001715
1	833452	833570	RLOC_00000274	.	+	49.70	0.3706	0.06104	0.1534	0.0001715
1	833693	833956	RLOC_00000274	.	+	68.64	0.1629	0.3747	0.5272	0.0001715
1	834142	834419	RLOC_00000274	.	+	77.38	-0.3763	0.01663	0.06458	0.0001715
1	834513	835267	RLOC_00000274	.	+	214.10	-0.5451	1.005e-06	0.0001068	0.0001715
1	835267	835336	RLOC_00000274	.	+	7.48	0.1506	0.7919	0.8675	0.0001715
1	835783	836328	RLOC_00000275	.	+	250.49	0.3279	0.004762	0.02872	0.004353
1	836767	837233	RLOC_00000275	.	+	293.51	0.4422	0.001698	0.01504	0.004353
1	837470	837908	RLOC_00000275	.	+	376.55	0.4954	0.0002111	0.004194	0.004353
1	838067	838314	RLOC_00000275	.	+	276.25	0.2200	0.01044	0.04751	0.004353
1	838399	839227	RLOC_00000275	.	+	641.77	0.1039	0.02814	0.09106	0.004353
1	839311	839469	RLOC_00000275	.	+	232.95	-0.0807	0.9906	0.9945	0.004353
1	839469	839620	RLOC_00000275	.	+	9.64	1.5775	0.007366	0.03797	0.004353
1	839676	839807	RLOC_00000275	.	+	233.46	-0.1947	0.1779	0.3169	0.004353
1	839918	840424	RLOC_00000275	.	+	600.98	-0.5179	8.717e-05	0.002408	0.004353
1	840506	840951	RLOC_00000275	.	+	416.14	-0.9074	0.0007292	0.009015	0.004353
1	842764	843230	RLOC_00000277	.	-	387.64	-0.2538	0.07482	0.1759	0.5217
1	843230	843553	RLOC_00000277	.	-	360.19	0.0353	0.4635	0.6091	0.5217
1	843629	844197	RLOC_00000277	.	-	470.41	0.1203	0.1365	0.2644	0.5217
1	844487	845033	RLOC_00000278	.	-	75.25	0.0060	0.9305	0.958	0.9187
1	845113	845435	RLOC_00000278	.	-	55.01	0.1884	0.3195	0.4736	0.9187
1	845918	847667	RLOC_00000278	.	-	535.68	-0.0450	0.4091	0.5598	0.9187
1	846286	846369	RLOC_00000279	.	+	3.34	0.2509	0.5606	0.6928	0.09754
1	846733	847739	RLOC_00000279	.	+	825.15	-0.1964	0.1963	0.3388	0.09754
1	847882	848228	RLOC_00000279	.	+	290.27	0.3076	0.00657	0.03528	0.09754
1	848365	848713	RLOC_00000279	.	+	273.28	0.2417	0.01902	0.07037	0.09754
1	848807	848880	RLOC_00000279	.	+	209.50	0.0138	0.6883	0.7926	0.09754
1	848996	849492	RLOC_00000279	.	+	360.12	-0.3479	0.02084	0.07481	0.09754
1	860808	861278	RLOC_00000282	.	-	83.40	-0.2926	0.1152	0.2355	0.0624
1	861367	861511	RLOC_00000282	.	-	45.24	-0.2887	0.3679	0.5209	0.0624
1	861605	861909	RLOC_00000282	.	-	62.83	0.0970	0.4609	0.6068	0.0624
1	862041	862212	RLOC_00000282	.	-	39.89	-0.0091	0.7577	0.8438	0.0624
1	862313	862393	RLOC_00000282	.	-	30.88	-0.1753	0.5866	0.714	0.0624
1	862487	862640	RLOC_00000282	.	-	36.83	-0.0955	0.8192	0.8858	0.0624
1	862752	862804	RLOC_00000282	.	-	27.69	0.3818	0.1152	0.2354	0.0624
1	863458	863541	RLOC_00000282	.	-	30.88	0.6380	0.003623	0.02414	0.0624
1	863859	864050	RLOC_00000282	.	-	47.76	-0.0599	0.7469	0.8361	0.0624
1	865986	866079	RLOC_00000283	.	-	7.19	1.5284	0.0009001	0.01024	0.02263
1	866079	866941	RLOC_00000283	.	-	166.64	-0.2226	0.03921	0.1137	0.02263
1	867408	867520	RLOC_00000283	.	-	28.70	-0.0822	0.8326	0.8947	0.02263
1	867629	867721	RLOC_00000283	.	-	15.59	0.3698	0.1279	0.2531	0.02263
1	868998	869373	RLOC_00000284	.	-	1415.15	-0.3779	0.02216	0.07785	0.2388
1	869453	869553	RLOC_00000284	.	-	927.69	-0.2028	0.0447	0.1242	0.2388
1	869655	869786	RLOC_00000284	.	-	908.52	0.0169	0.4696	0.6146	0.2388
1	869874	869964	RLOC_00000284	.	-	638.11	0.0517	0.2887	0.4421	0.2388
1	870143	870228	RLOC_00000284	.	-	585.50	0.0964	0.1494	0.2812	0.2388
1	870312	870408	RLOC_00000284	.	-	550.80	0.1701	0.05341	0.1401	0.2388
1	870495	871203	RLOC_00000284	.	-	1671.29	0.1619	0.112	0.2308	0.2388
1	873223	875190	RLOC_00000287	.	-	361.41	-0.1887	0.02598	0.08647	0.2668
1	875294	875464	RLOC_00000287	.	-	4.62	0.4389	0.2498	0.4003	0.2668
1	875601	875822	RLOC_00000287	.	-	5.50	0.7461	0.06292	0.1566	0.2668
1	876317	876904	RLOC_00000288	.	-	27.84	0.2075	0.2288	0.3766	0.8437
1	877080	877475	RLOC_00000288	.	-	17.33	-0.2783	0.2435	0.3933	0.8437
1	877865	878655	RLOC_00000290	.	-	367.49	-0.3361	0.0001579	0.003509	0.002936
1	878734	878810	RLOC_00000290	.	-	79.48	-0.0330	0.9344	0.9605	0.002936
1	878910	880197	RLOC_00000290	.	-	320.10	0.3396	4.943e-05	0.001686	0.002936
1	880540	881876	RLOC_00000291	.	-	279.41	-0.1460	0.2964	0.45	0.03942
1	881977	882055	RLOC_00000291	.	-	50.09	0.6281	0.001958	0.01638	0.03942
1	882249	883529	RLOC_00000291	.	-	253.78	-0.0795	0.6518	0.7653	0.03942
1	883845	883957	RLOC_00000292	.	+	6.94	-0.0486	0.4179	0.5679	0.001157
1	884026	884106	RLOC_00000292	.	+	4.69	0.4455	0.2689	0.4213	0.001157
1	884236	884684	RLOC_00000292	.	+	17.95	1.0789	5.344e-05	0.001774	0.001157
1	884684	884843	RLOC_00000292	.	+	10.23	0.8840	0.06114	0.1535	0.001157
1	884843	885011	RLOC_00000292	.	+	10.31	0.6629	0.07628	0.1782	0.001157
1	885011	885121	RLOC_00000292	.	+	6.50	0.2769	0.41	0.5605	0.001157
1	885209	885273	RLOC_00000292	.	+	5.46	0.8311	0.1503	0.2822	0.001157
1	885338	886284	RLOC_00000292	.	+	36.85	0.4366	0.0512	0.1362	0.001157
1	886284	886608	RLOC_00000292	.	+	21.66	-0.8433	0.005603	0.03193	0.001157
1	886702	886843	RLOC_00000292	.	+	12.72	0.2103	0.4673	0.6126	0.001157
1	886991	887248	RLOC_00000292	.	+	20.03	-0.4058	0.2505	0.401	0.001157
1	887501	887811	RLOC_00000292	.	+	17.07	-1.8798	1.328e-05	0.0007012	0.001157
1	887869	887926	RLOC_00000292	.	+	9.51	-2.4615	0.01996	0.07266	0.001157
1	885632	885938	RLOC_00000293	.	-	95.56	-1.1394	1.241e-06	0.0001259	0
1	886034	886100	RLOC_00000293	.	-	48.31	-0.7175	0.009687	0.04536	0
1	886392	886460	RLOC_00000293	.	-	38.82	-0.4651	0.07512	0.1764	0
1	886695	886789	RLOC_00000293	.	-	43.95	-0.6497	0.006167	0.03392	0
1	886877	886940	RLOC_00000293	.	-	38.80	-0.7639	0.004209	0.02658	0
1	887014	887137	RLOC_00000293	.	-	48.19	-0.7119	0.007634	0.03883	0
1	887367	887430	RLOC_00000293	.	-	38.41	-0.7409	0.01113	0.04959	0
1	887530	887635	RLOC_00000293	.	-	43.86	-1.1125	0.0006196	0.008158	0
1	887724	889524	RLOC_00000293	.	-	195.49	1.1349	5.397e-21	8.434e-18	0
1	889768	890007	RLOC_00000293	.	-	26.94	1.6526	1.745e-12	9.552e-10	0
1	893063	893206	RLOC_00000296	.	+	22.17	0.4226	0.09366	0.2045	0.1024
1	893206	893490	RLOC_00000296	.	+	40.10	0.3624	0.03486	0.1051	0.1024
1	893568	894052	RLOC_00000296	.	+	78.19	-0.4339	0.007006	0.03678	0.1024
1	894052	894187	RLOC_00000296	.	+	12.76	-0.1565	0.591	0.7177	0.1024
1	894280	894944	RLOC_00000297	.	-	569.32	-0.7692	5.478e-05	0.001805	0.003159
1	895029	895472	RLOC_00000297	.	-	341.82	-0.0687	0.2297	0.3776	0.003159
1	895582	895921	RLOC_00000297	.	-	287.78	0.1585	0.004282	0.02685	0.003159
1	896013	896482	RLOC_00000297	.	-	278.83	0.3327	6.761e-05	0.002063	0.003159
1	897131	897277	RLOC_00000297	.	-	6.29	0.9329	0.07879	0.1821	0.003159
1	897355	897553	RLOC_00000297	.	-	49.24	0.1221	0.1597	0.2943	0.003159
1	904239	904420	RLOC_00000301	.	-	33.55	-0.5470	0.05607	0.1447	0.129
1	904520	904615	RLOC_00000301	.	-	40.78	-0.6672	0.00955	0.04494	0.129
1	904880	905004	RLOC_00000301	.	-	30.37	-0.2664	0.3029	0.4566	0.129
1	905118	905173	RLOC_00000301	.	-	19.40	0.0100	0.7003	0.8018	0.129
1	905267	905383	RLOC_00000301	.	-	25.21	0.3386	0.1461	0.2769	0.129
1	905496	905565	RLOC_00000301	.	-	19.85	0.5998	0.02074	0.07457	0.129
1	905666	905784	RLOC_00000301	.	-	22.90	0.2158	0.2347	0.3833	0.129
1	905910	906023	RLOC_00000301	.	-	16.64	0.5933	0.07897	0.1824	0.129
1	906134	906615	RLOC_00000301	.	-	23.29	0.3375	0.1271	0.252	0.129
1	907621	907756	RLOC_00000302	.	+	911.68	0.5909	9.794e-05	0.00259	0.00471
1	907846	907953	RLOC_00000302	.	+	1432.45	0.4864	0.0001488	0.003378	0.00471
1	907953	908030	RLOC_00000302	.	+	6.31	0.1364	0.2759	0.4286	0.00471
1	908030	908574	RLOC_00000302	.	+	4518.75	0.0831	0.1202	0.2424	0.00471
1	908651	909013	RLOC_00000302	.	+	3970.29	-0.2605	0.0006153	0.008119	0.00471
1	909087	909376	RLOC_00000302	.	+	2255.12	-0.4751	0.00722	0.03752	0.00471
1	910147	910481	RLOC_00000304	.	-	65.19	-0.1659	0.2563	0.4076	0.7953
1	910859	911160	RLOC_00000304	.	-	60.28	0.2058	0.1906	0.3321	0.7953
1	911559	911694	RLOC_00000304	.	-	6.81	-0.2109	0.593	0.7193	0.7953
1	911807	911885	RLOC_00000304	.	-	5.40	0.0962	0.6958	0.7983	0.7953
1	916829	917313	RLOC_00000307	.	-	5812.79	-0.0720	0.1254	0.2497	0.6741
1	917372	918039	RLOC_00000307	.	-	4967.69	0.0725	0.1256	0.2499	0.6741
1	918308	918601	RLOC_00000308	.	+	52.17	0.3263	0.02439	0.08292	0.1514
1	918867	919008	RLOC_00000308	.	+	52.10	0.3320	0.1094	0.2271	0.1514
1	919095	919188	RLOC_00000308	.	+	49.42	0.2555	0.1612	0.2961	0.1514
1	919265	919393	RLOC_00000308	.	+	63.05	0.2872	0.07754	0.1802	0.1514
1	919502	919609	RLOC_00000308	.	+	62.90	-0.0000	0.8455	0.9031	0.1514
1	919736	919817	RLOC_00000308	.	+	59.72	-0.1932	0.3013	0.455	0.1514
1	919912	919996	RLOC_00000308	.	+	87.95	-0.2003	0.2148	0.3605	0.1514
1	920086	920533	RLOC_00000308	.	+	173.89	-0.2760	0.01186	0.05172	0.1514
1	921039	921105	RLOC_00000309	.	+	9.88	0.4328	0.3406	0.4945	0.9292
1	921105	921195	RLOC_00000309	.	+	13.75	0.2102	0.448	0.5953	0.9292
1	921298	921401	RLOC_00000309	.	+	15.05	-0.2382	0.42	0.5698	0.9292
1	921610	921867	RLOC_00000309	.	+	18.39	-0.2651	0.4657	0.6111	0.9292
1	923628	923685	RLOC_00000310	.	+	3.38	-0.4202	0.3346	0.4887	0.9211
1	923857	923935	RLOC_00000310	.	+	3.97	0.3667	0.3249	0.4789	0.9211
1	933509	933676	RLOC_00000314	.	+	16.50	0.0256	0.6784	0.7853	0.02407
1	933676	934708	RLOC_00000314	.	+	283.91	0.4385	0.0009829	0.01079	0.02407
1	934784	935069	RLOC_00000314	.	+	113.24	0.1923	0.1092	0.2269	0.02407
1	935163	935481	RLOC_00000314	.	+	125.41	-0.0702	0.827	0.8911	0.02407
1	935569	935797	RLOC_00000314	.	+	121.97	-0.0022	0.821	0.887	0.02407
1	935881	936097	RLOC_00000314	.	+	145.96	0.0872	0.3511	0.505	0.02407
1	936188	936572	RLOC_00000314	.	+	241.39	-0.1305	0.2352	0.3839	0.02407
1	936653	937041	RLOC_00000314	.	+	201.35	-0.6976	0.002517	0.01922	0.02407
1	937948	938309	RLOC_00000318	.	+	25.48	0.5584	0.05636	0.1453	0.02092
1	938433	938530	RLOC_00000318	.	+	13.66	0.7747	0.03082	0.09683	0.02092
1	938633	939718	RLOC_00000318	.	+	67.06	0.3992	0.05113	0.1361	0.02092
1	939718	939800	RLOC_00000318	.	+	17.24	0.1626	0.4612	0.6071	0.02092
1	939875	940002	RLOC_00000318	.	+	24.74	0.1855	0.4759	0.6204	0.02092
1	940091	940367	RLOC_00000318	.	+	44.09	0.0869	0.7679	0.8508	0.02092
1	940452	940678	RLOC_00000318	.	+	50.88	-0.4160	0.006467	0.03494	0.02092
1	940772	941174	RLOC_00000318	.	+	56.20	-0.6440	0.0008044	0.00957	0.02092
1	941089	941267	RLOC_00000319	.	-	59.09	-0.4376	0.03719	0.1097	0.08783
1	941365	941431	RLOC_00000319	.	-	63.71	-0.3861	0.03474	0.1048	0.08783
1	941693	941794	RLOC_00000319	.	-	81.31	-0.3119	0.1292	0.2547	0.08783
1	942030	942105	RLOC_00000319	.	-	61.13	-0.0815	0.7445	0.8343	0.08783
1	942186	942567	RLOC_00000319	.	-	89.03	0.1997	0.3085	0.4624	0.08783
1	942652	942820	RLOC_00000319	.	-	36.79	0.4954	0.06046	0.1523	0.08783
1	942979	943039	RLOC_00000319	.	-	25.42	0.5290	0.3419	0.4958	0.08783
1	943122	943350	RLOC_00000319	.	-	36.87	0.9022	0.005708	0.03231	0.08783
1	944631	944982	RLOC_00000320	.	+	34.33	0.5536	0.03739	0.1101	0.1544
1	945116	945168	RLOC_00000320	.	+	16.33	0.5436	0.09044	0.1998	0.1544
1	945471	945530	RLOC_00000320	.	+	17.51	0.4522	0.1832	0.3234	0.1544
1	945779	945861	RLOC_00000320	.	+	21.10	-0.0497	0.8986	0.938	0.1544
1	945951	946072	RLOC_00000320	.	+	25.66	0.1704	0.4679	0.6131	0.1544
1	946308	946812	RLOC_00000320	.	+	88.18	0.3306	0.01928	0.07098	0.1544
1	946893	947001	RLOC_00000320	.	+	53.78	-0.2187	0.2096	0.3545	0.1544
1	947122	947293	RLOC_00000320	.	+	71.63	-0.5684	0.01217	0.05258	0.1544
1	947398	947579	RLOC_00000320	.	+	42.97	-0.6486	0.03784	0.111	0.1544
1	947643	948009	RLOC_00000321	.	-	49.59	-0.4011	0.2074	0.3519	0.2098
1	948087	948147	RLOC_00000321	.	-	27.05	-0.5658	0.07052	0.169	0.2098
1	948234	948343	RLOC_00000321	.	-	28.86	-0.5405	0.02089	0.07493	0.2098
1	948428	948595	RLOC_00000321	.	-	34.57	-0.2385	0.3316	0.4858	0.2098
1	948696	948816	RLOC_00000321	.	-	28.65	-0.0457	0.6927	0.796	0.2098
1	948911	948992	RLOC_00000321	.	-	20.69	0.2305	0.4096	0.5603	0.2098
1	949075	949207	RLOC_00000321	.	-	23.53	0.0449	0.8504	0.9061	0.2098
1	949296	949452	RLOC_00000321	.	-	20.01	-0.1260	0.9595	0.9761	0.2098
1	949540	949621	RLOC_00000321	.	-	13.20	-0.2567	0.8234	0.8887	0.2098
1	949733	949796	RLOC_00000321	.	-	18.42	0.0195	0.7652	0.849	0.2098
1	949882	950125	RLOC_00000321	.	-	31.51	-0.0670	0.8046	0.8762	0.2098
1	950197	950311	RLOC_00000321	.	-	19.49	0.4179	0.1224	0.2456	0.2098
1	950403	950500	RLOC_00000321	.	-	14.80	0.7154	0.06514	0.1602	0.2098
1	950581	950794	RLOC_00000321	.	-	21.24	0.4524	0.08741	0.1953	0.2098
1	950880	951041	RLOC_00000321	.	-	15.66	0.5271	0.08844	0.1968	0.2098
1	951125	951211	RLOC_00000321	.	-	11.36	0.9215	0.01848	0.0691	0.2098
1	951527	951754	RLOC_00000321	.	-	16.06	0.4682	0.08779	0.1959	0.2098
1	954552	954960	RLOC_00000322	.	+	35.73	0.2644	0.2564	0.4077	0.7771
1	954960	955734	RLOC_00000322	.	+	69.81	-0.1433	0.1786	0.3177	0.7771
1	955734	956045	RLOC_00000322	.	+	21.60	0.0126	0.6628	0.7735	0.7771
1	961782	963177	RLOC_00000327	.	-	185.66	-0.8662	0.0003103	0.00531	0.01059
1	963177	963321	RLOC_00000327	.	-	27.32	0.0652	0.2584	0.41	0.01059
1	963468	963546	RLOC_00000327	.	-	25.29	0.0641	0.282	0.4351	0.01059
1	963638	964191	RLOC_00000327	.	-	56.36	-0.0596	0.3155	0.4695	0.01059
1	964294	964380	RLOC_00000327	.	-	19.04	0.1561	0.1352	0.2627	0.01059
1	964503	964626	RLOC_00000327	.	-	25.15	0.2415	0.06813	0.1651	0.01059
1	964738	964873	RLOC_00000327	.	-	26.07	-0.1732	0.6645	0.7747	0.01059
1	964951	965041	RLOC_00000327	.	-	20.70	-0.4974	0.563	0.6948	0.01059
1	965123	965309	RLOC_00000327	.	-	26.57	-0.1172	0.5114	0.6511	0.01059
1	965452	965506	RLOC_00000327	.	-	18.63	0.1385	0.2215	0.3682	0.01059
1	965598	965736	RLOC_00000327	.	-	18.15	0.4915	0.0837	0.1898	0.01059
1	965822	965888	RLOC_00000327	.	-	10.36	0.9639	0.009098	0.04355	0.01059
1	965995	966157	RLOC_00000327	.	-	14.32	1.1177	0.00253	0.01928	0.01059
1	966445	966736	RLOC_00000327	.	-	18.12	0.8227	0.002914	0.02103	0.01059
1	967786	967953	RLOC_00000328	.	-	5.73	0.6545	0.112	0.2309	0.6411
1	968069	968165	RLOC_00000328	.	-	7.20	-0.0948	0.8123	0.8814	0.6411
1	968334	968484	RLOC_00000328	.	-	6.70	0.2092	0.4525	0.5993	0.6411
1	969332	969554	RLOC_00000328	.	-	11.01	-0.1965	0.5307	0.6679	0.6411
1	969919	970041	RLOC_00000328	.	-	6.06	-0.5096	0.2494	0.3998	0.6411
1	976253	976635	RLOC_00000329	.	-	24.32	0.5915	0.01874	0.06972	0.09839
1	977089	977752	RLOC_00000329	.	-	400.67	-0.2588	0.006643	0.03556	0.09839
1	979330	979800	RLOC_00000330	.	-	623.28	-0.2435	0.1095	0.2273	0.3703
1	979889	980103	RLOC_00000330	.	-	573.27	-0.1081	0.2203	0.3668	0.3703
1	980183	980356	RLOC_00000330	.	-	416.70	-0.0515	0.7548	0.8418	0.3703
1	980777	980896	RLOC_00000330	.	-	280.69	0.1781	0.04238	0.1198	0.3703
1	980984	981162	RLOC_00000330	.	-	337.37	0.1828	0.08402	0.1903	0.3703
1	981772	981868	RLOC_00000330	.	-	184.43	0.2431	0.06702	0.1633	0.3703
1	991160	991747	RLOC_00000334	.	+	1011.90	0.0886	0.1685	0.3055	0.7269
1	992169	992359	RLOC_00000334	.	+	7.70	0.3577	0.3296	0.4837	0.7269
1	992415	992704	RLOC_00000334	.	+	891.54	0.0026	0.9799	0.9882	0.7269
1	992775	993114	RLOC_00000334	.	+	648.45	-0.1509	0.1495	0.2813	0.7269
1	993425	993631	RLOC_00000335	.	+	9.73	0.3292	0.4418	0.5897	0.3511
1	993730	993808	RLOC_00000335	.	+	4.34	0.3600	0.3947	0.5464	0.3511
1	994045	994168	RLOC_00000335	.	+	10.24	0.2058	0.5372	0.6733	0.3511
1	994353	994405	RLOC_00000335	.	+	8.81	0.4611	0.375	0.5275	0.3511
1	994495	994632	RLOC_00000335	.	+	13.33	-0.0090	0.8061	0.8773	0.3511
1	994827	994914	RLOC_00000335	.	+	14.18	0.0200	0.8334	0.8951	0.3511
1	995312	995709	RLOC_00000335	.	+	29.18	-0.4495	0.03902	0.1134	0.3511
1	996127	996217	RLOC_00000336	.	+	75.53	0.2822	0.1294	0.255	0.009663
1	996425	996734	RLOC_00000336	.	+	243.48	0.3662	0.01489	0.0601	0.009663
1	996846	996939	RLOC_00000336	.	+	157.70	0.4162	0.0002746	0.004921	0.009663
1	997176	997276	RLOC_00000336	.	+	181.80	0.1287	0.07069	0.1693	0.009663
1	997417	997490	RLOC_00000336	.	+	202.77	-0.0893	0.9618	0.9772	0.009663
1	997602	997666	RLOC_00000336	.	+	190.03	-0.0458	0.644	0.7598	0.009663
1	997754	997896	RLOC_00000336	.	+	241.91	0.0214	0.3532	0.5069	0.009663
1	998419	998515	RLOC_00000336	.	+	157.79	0.0222	0.4339	0.5826	0.009663
1	998732	999017	RLOC_00000336	.	+	250.99	-0.0417	0.7124	0.8105	0.009663
1	999108	999411	RLOC_00000336	.	+	345.00	-0.0231	0.5703	0.7008	0.009663
1	999503	999680	RLOC_00000336	.	+	307.43	0.0530	0.2131	0.3585	0.009663
1	999759	1000027	RLOC_00000336	.	+	495.23	-0.2632	0.3327	0.487	0.009663
1	1000111	1000437	RLOC_00000336	.	+	485.94	-0.8507	0.003496	0.0236	0.009663
1	1002310	1002384	RLOC_00000337	.	+	4.81	-1.0759	0.06665	0.1627	0.4891
1	1002471	1002564	RLOC_00000337	.	+	5.38	0.0035	0.9969	0.9984	0.4891
1	1002564	1002687	RLOC_00000337	.	+	10.19	0.3423	0.4463	0.5937	0.4891
1	1002782	1002862	RLOC_00000337	.	+	8.35	0.0829	0.8167	0.8842	0.4891
1	1002947	1003009	RLOC_00000337	.	+	7.53	-0.1886	0.8623	0.914	0.4891
1	1003419	1003502	RLOC_00000337	.	+	6.38	1.1232	0.1162	0.2368	0.4891
1	1003809	1003894	RLOC_00000337	.	+	9.31	-0.0851	0.8206	0.8867	0.4891
1	1003970	1004027	RLOC_00000337	.	+	10.28	-0.0125	0.9278	0.9564	0.4891
1	1004124	1004221	RLOC_00000337	.	+	11.26	-0.1864	0.6029	0.7273	0.4891
1	1004812	1005514	RLOC_00000338	.	+	241.41	0.1484	0.07372	0.1741	0.01962
1	1005745	1005815	RLOC_00000338	.	+	101.85	0.0707	0.4851	0.6283	0.01962
1	1005925	1006074	RLOC_00000338	.	+	124.36	0.2677	0.08982	0.1989	0.01962
1	1006175	1006271	RLOC_00000338	.	+	135.79	0.2316	0.08401	0.1903	0.01962
1	1006427	1006498	RLOC_00000338	.	+	136.58	0.2657	0.04535	0.1254	0.01962
1	1006578	1006642	RLOC_00000338	.	+	175.30	0.1091	0.2363	0.3851	0.01962
1	1006733	1006797	RLOC_00000338	.	+	174.27	0.1095	0.2245	0.3717	0.01962
1	1006916	1007001	RLOC_00000338	.	+	209.69	-0.0158	0.9928	0.9959	0.01962
1	1007080	1007207	RLOC_00000338	.	+	198.68	-0.1301	0.5097	0.6498	0.01962
1	1007289	1007525	RLOC_00000338	.	+	212.60	-0.2656	0.06594	0.1615	0.01962
1	1007600	1007732	RLOC_00000338	.	+	252.81	-0.1032	0.4526	0.5995	0.01962
1	1007826	1008300	RLOC_00000338	.	+	392.18	-0.3107	0.0007356	0.009065	0.01962
1	1008549	1010175	RLOC_00000339	.	+	133.50	0.6702	2.475e-11	1.085e-08	1.739e-08
1	1010242	1011123	RLOC_00000339	.	+	100.17	-0.7844	5.271e-11	2.134e-08	1.739e-08
1	1011180	1011433	RLOC_00000341	.	-	115.00	-0.5254	0.008924	0.04303	0.07997
1	1011494	1011557	RLOC_00000341	.	-	130.55	-0.4398	0.008209	0.04078	0.07997
1	1011776	1011858	RLOC_00000341	.	-	150.93	-0.1616	0.1791	0.3183	0.07997
1	1011941	1012013	RLOC_00000341	.	-	158.95	-0.0805	0.5102	0.6502	0.07997
1	1012164	1012236	RLOC_00000341	.	-	124.77	0.2193	0.08224	0.1876	0.07997
1	1012334	1012439	RLOC_00000341	.	-	136.10	0.3420	0.007802	0.03939	0.07997
1	1012507	1012559	RLOC_00000341	.	-	94.94	0.3607	0.00504	0.02982	0.07997
1	1013178	1013350	RLOC_00000341	.	-	76.06	0.2485	0.1438	0.274	0.07997
1	1013731	1014237	RLOC_00000342	.	+	56.95	0.3668	0.04032	0.1159	0.006459
1	1014333	1014543	RLOC_00000342	.	+	50.22	0.1284	0.3974	0.5488	0.006459
1	1014620	1014676	RLOC_00000342	.	+	16.89	-0.1109	0.8654	0.916	0.006459
1	1014766	1014872	RLOC_00000342	.	+	37.55	0.4516	0.02285	0.07943	0.006459
1	1014950	1015050	RLOC_00000342	.	+	34.26	0.4488	0.05883	0.1496	0.006459
1	1015198	1015304	RLOC_00000342	.	+	33.25	0.2496	0.2469	0.3971	0.006459
1	1015427	1015518	RLOC_00000342	.	+	37.67	0.1221	0.4077	0.5585	0.006459
1	1015683	1015825	RLOC_00000342	.	+	53.84	-0.0301	0.8821	0.927	0.006459
1	1016078	1016254	RLOC_00000342	.	+	45.46	-0.2451	0.4509	0.598	0.006459
1	1016334	1016449	RLOC_00000342	.	+	49.09	-0.8220	0.01269	0.05406	0.006459
1	1016794	1016951	RLOC_00000342	.	+	62.15	-0.1799	0.3931	0.5448	0.006459
1	1017057	1017183	RLOC_00000342	.	+	58.66	0.3221	0.03839	0.1121	0.006459
1	1017249	1017331	RLOC_00000342	.	+	3.46	3.2056	0.0001547	0.003466	0.006459
1	1017331	1017481	RLOC_00000342	.	+	77.83	-0.3246	0.1779	0.3169	0.006459
1	1017567	1017898	RLOC_00000342	.	+	80.72	-0.4867	0.0472	0.1289	0.006459
1	1024666	1025116	RLOC_00000347	.	-	38.40	-0.3535	0.004424	0.0274	0.07235
1	1025366	1025587	RLOC_00000347	.	-	18.56	-0.1685	0.1611	0.2961	0.07235
1	1026065	1026510	RLOC_00000347	.	-	34.27	-0.1074	0.6287	0.7479	0.07235
1	1026731	1027054	RLOC_00000347	.	-	25.26	0.3817	0.9535	0.9721	0.07235
1	1027234	1027320	RLOC_00000347	.	-	8.60	-0.7850	0.06884	0.1663	0.07235
1	1027401	1027564	RLOC_00000347	.	-	10.06	-0.4437	0.3388	0.4928	0.07235
1	1028131	1029103	RLOC_00000347	.	-	414.67	0.3271	0.02558	0.08564	0.07235
1	1031241	1031573	RLOC_00000349	.	-	42.02	-0.3797	0.2635	0.4155	0.05992
1	1031688	1031784	RLOC_00000349	.	-	39.63	-0.1509	0.6377	0.7548	0.05992
1	1031900	1031985	RLOC_00000349	.	-	36.72	-0.2330	0.2037	0.3475	0.05992
1	1032058	1032163	RLOC_00000349	.	-	33.38	-0.4568	0.07294	0.1728	0.05992
1	1032243	1032412	RLOC_00000349	.	-	44.18	-0.3223	0.1178	0.2391	0.05992
1	1032581	1032653	RLOC_00000349	.	-	33.54	-0.0146	0.855	0.9091	0.05992
1	1032807	1032859	RLOC_00000349	.	-	27.04	0.4220	0.2196	0.366	0.05992
1	1033186	1033281	RLOC_00000349	.	-	24.63	0.3116	0.1928	0.3346	0.05992
1	1033437	1033537	RLOC_00000349	.	-	25.66	0.1042	0.5911	0.7177	0.05992
1	1033875	1034029	RLOC_00000349	.	-	31.22	-0.0517	0.7594	0.8452	0.05992
1	1034121	1034338	RLOC_00000349	.	-	34.80	0.0662	0.7614	0.8465	0.05992
1	1034701	1034778	RLOC_00000349	.	-	16.63	-0.1279	0.9863	0.9921	0.05992
1	1034885	1035055	RLOC_00000349	.	-	23.19	0.4259	0.1106	0.2289	0.05992
1	1035139	1035284	RLOC_00000349	.	-	22.39	0.2680	0.2713	0.4239	0.05992
1	1035382	1035518	RLOC_00000349	.	-	25.23	0.0925	0.581	0.7096	0.05992
1	1035885	1036123	RLOC_00000349	.	-	30.01	0.4886	0.04978	0.1338	0.05992
1	1036123	1036179	RLOC_00000349	.	-	6.86	1.5436	0.003433	0.02332	0.05992
1	1036622	1036692	RLOC_00000350	.	+	13.50	0.4577	0.09998	0.2137	0.02965
1	1036796	1036850	RLOC_00000350	.	+	14.79	0.4539	0.06107	0.1534	0.02965
1	1036943	1037014	RLOC_00000350	.	+	16.84	0.4962	0.06021	0.1519	0.02965
1	1037088	1037441	RLOC_00000350	.	+	41.02	0.4198	0.02031	0.07351	0.02965
1	1037530	1037746	RLOC_00000350	.	+	33.97	0.7520	0.001327	0.01293	0.02965
1	1037920	1038175	RLOC_00000350	.	+	39.16	-0.1171	0.979	0.9876	0.02965
1	1038275	1038376	RLOC_00000350	.	+	25.41	-0.6126	0.2348	0.3834	0.02965
1	1038518	1038705	RLOC_00000350	.	+	44.21	-0.4943	0.205	0.3492	0.02965
1	1038800	1038898	RLOC_00000350	.	+	39.53	-0.2609	0.2673	0.4195	0.02965
1	1038994	1039085	RLOC_00000350	.	+	25.50	-0.2058	0.5999	0.7247	0.02965
1	1039223	1039389	RLOC_00000350	.	+	28.05	-0.0942	0.9992	0.9998	0.02965
1	1039487	1039606	RLOC_00000350	.	+	27.92	-0.3446	0.1911	0.3327	0.02965
1	1039694	1040081	RLOC_00000350	.	+	59.66	-0.3609	0.1358	0.2635	0.02965
1	1040081	1040157	RLOC_00000350	.	+	8.41	0.2164	0.7927	0.868	0.02965
1	1040430	1040680	RLOC_00000351	.	+	21.48	0.2167	0.4598	0.6059	0.4562
1	1040873	1040974	RLOC_00000351	.	+	14.98	0.5478	0.1909	0.3325	0.4562
1	1041132	1042093	RLOC_00000351	.	+	96.97	0.2574	0.1477	0.2791	0.4562
1	1042238	1042315	RLOC_00000351	.	+	27.95	-0.3408	0.05932	0.1504	0.4562
1	1042315	1042567	RLOC_00000351	.	+	14.32	-0.1841	0.8982	0.9377	0.4562
1	1042567	1042810	RLOC_00000351	.	+	37.18	-0.3649	0.1081	0.2254	0.4562
1	1042349	1042742	RLOC_00000352	.	-	475.35	-0.1003	0.2625	0.4143	0.5985
1	1042952	1043164	RLOC_00000352	.	-	341.30	-0.0354	0.4204	0.5702	0.5985
1	1043391	1043853	RLOC_00000352	.	-	342.46	0.2335	0.09721	0.2097	0.5985
1	1045708	1045995	RLOC_00000354	.	-	21.80	-0.3833	0.1063	0.2228	0.5357
1	1046098	1046195	RLOC_00000354	.	-	18.18	-0.5443	0.09166	0.2016	0.5357
1	1046328	1046379	RLOC_00000354	.	-	16.75	-0.5062	0.07869	0.1819	0.5357
1	1046469	1046536	RLOC_00000354	.	-	14.43	-0.0087	0.9933	0.9963	0.5357
1	1046623	1046877	RLOC_00000354	.	-	22.35	0.1495	0.6626	0.7733	0.5357
1	1046986	1047291	RLOC_00000354	.	-	17.37	0.4778	0.1016	0.2161	0.5357
1	1047341	1047557	RLOC_00000354	.	-	19.62	-0.0886	0.9116	0.9465	0.5357
1	1047557	1047697	RLOC_00000354	.	-	11.72	0.6751	0.1189	0.2407	0.5357
1	1047697	1047929	RLOC_00000354	.	-	12.01	0.3494	0.4892	0.6319	0.5357
1	1048207	1048313	RLOC_00000354	.	-	9.11	-0.4199	0.2758	0.4285	0.5357
1	1048498	1048630	RLOC_00000354	.	-	7.92	0.3931	0.7286	0.8226	0.5357
1	1049051	1049177	RLOC_00000354	.	-	6.79	1.1669	0.1063	0.2227	0.5357
1	1051320	1051491	RLOC_00000356	.	+	135.61	0.6062	0.0001903	0.003926	0.003307
1	1051768	1052037	RLOC_00000356	.	+	318.70	0.4477	0.0009119	0.01032	0.003307
1	1052159	1052270	RLOC_00000356	.	+	264.60	0.1961	0.02674	0.08815	0.003307
1	1052543	1053187	RLOC_00000356	.	+	462.77	0.3304	0.001213	0.01227	0.003307
1	1053325	1053494	RLOC_00000356	.	+	334.21	0.2314	0.009029	0.04333	0.003307
1	1053806	1054200	RLOC_00000356	.	+	594.81	0.0186	0.5233	0.6616	0.003307
1	1054200	1054806	RLOC_00000356	.	+	481.53	0.0352	0.4013	0.5525	0.003307
1	1054934	1055088	RLOC_00000356	.	+	375.01	-0.0495	0.8157	0.8834	0.003307
1	1055173	1055292	RLOC_00000356	.	+	296.19	-0.0002	0.7351	0.8275	0.003307
1	1055477	1055708	RLOC_00000356	.	+	543.95	-0.0667	0.4138	0.5641	0.003307
1	1055797	1056104	RLOC_00000356	.	+	803.26	-0.3394	5.841e-05	0.001878	0.003307
1	1056185	1056288	RLOC_00000356	.	+	446.52	-0.3674	0.0007427	0.009116	0.003307
1	1056433	1056782	RLOC_00000356	.	+	410.08	-0.3726	0.01118	0.04974	0.003307
1	1059485	1060080	RLOC_00000358	.	+	80.02	-0.0226	0.8271	0.8911	0.9727
1	1060323	1060634	RLOC_00000358	.	+	77.42	0.0754	0.449	0.5962	0.9727
1	1060731	1060864	RLOC_00000358	.	+	56.25	-0.1327	0.4509	0.598	0.9727
1	1060956	1061180	RLOC_00000358	.	+	38.29	0.0770	0.7344	0.8269	0.9727
1	1061325	1061786	RLOC_00000360	.	-	30.91	-0.4586	0.08275	0.1883	0.5509
1	1061786	1062138	RLOC_00000360	.	-	21.03	0.3510	0.3178	0.4718	0.5509
1	1062225	1062673	RLOC_00000360	.	-	25.30	0.2530	0.2199	0.3664	0.5509
1	1062673	1062845	RLOC_00000360	.	-	12.70	-0.2072	0.7131	0.811	0.5509
1	1063051	1063113	RLOC_00000360	.	-	5.04	-0.6270	0.308	0.4618	0.5509
1	1063113	1063306	RLOC_00000360	.	-	9.99	0.0026	0.7246	0.8194	0.5509
1	1063379	1063815	RLOC_00000360	.	-	15.76	0.4389	0.1826	0.3227	0.5509
1	1064546	1064961	RLOC_00000361	.	-	300.15	-0.8111	0.0001224	0.002977	0.0001459
1	1065054	1065294	RLOC_00000361	.	-	270.39	-0.5686	0.0001877	0.003901	0.0001459
1	1065379	1065444	RLOC_00000361	.	-	159.90	-0.4083	0.005504	0.03157	0.0001459
1	1065549	1065855	RLOC_00000361	.	-	300.39	-0.3406	0.0002362	0.00449	0.0001459
1	1065934	1066149	RLOC_00000361	.	-	209.61	-0.1890	0.1526	0.2852	0.0001459
1	1066230	1066525	RLOC_00000361	.	-	211.26	0.0132	0.958	0.9753	0.0001459
1	1066606	1066771	RLOC_00000361	.	-	128.71	0.1989	0.1428	0.2726	0.0001459
1	1066849	1067550	RLOC_00000361	.	-	319.71	0.1301	0.1928	0.3346	0.0001459
1	1067760	1067849	RLOC_00000361	.	-	95.86	0.2318	0.07901	0.1824	0.0001459
1	1067926	1068247	RLOC_00000361	.	-	170.62	0.3430	0.01966	0.07193	0.0001459
1	1068356	1069611	RLOC_00000361	.	-	370.17	0.5424	0.0006755	0.008615	0.0001459
1	1069611	1069949	RLOC_00000361	.	-	118.89	0.7941	0.001402	0.01339	0.0001459
1	1069949	1070494	RLOC_00000361	.	-	154.65	0.9216	0.0001401	0.003248	0.0001459
1	1070687	1070906	RLOC_00000361	.	-	53.58	0.9510	8.195e-07	9.087e-05	0.0001459
1	1073411	1073569	RLOC_00000363	.	+	41.39	0.0789	0.7163	0.8134	0.6703
1	1073648	1073861	RLOC_00000363	.	+	78.38	0.1933	0.1235	0.2472	0.6703
1	1073939	1074131	RLOC_00000363	.	+	78.46	0.1012	0.5422	0.6774	0.6703
1	1074224	1074427	RLOC_00000363	.	+	84.69	-0.0022	0.9782	0.9871	0.6703
1	1074529	1074610	RLOC_00000363	.	+	75.51	-0.0441	0.9607	0.9767	0.6703
1	1074897	1075021	RLOC_00000363	.	+	77.30	-0.0195	0.9668	0.9804	0.6703
1	1075107	1075200	RLOC_00000363	.	+	72.67	-0.1983	0.296	0.4496	0.6703
1	1075300	1075512	RLOC_00000363	.	+	70.73	-0.2677	0.36	0.5134	0.6703
1	1075544	1076012	RLOC_00000364	.	-	963.43	-0.6628	0.002935	0.02113	0.0006781
1	1076118	1076227	RLOC_00000364	.	-	559.06	-0.4744	0.0004604	0.006785	0.0006781
1	1076309	1076424	RLOC_00000364	.	-	411.58	-0.4592	0.0001321	0.003117	0.0006781
1	1076424	1076565	RLOC_00000364	.	-	18.31	-1.3403	0.003211	0.02236	0.0006781
1	1076565	1076680	RLOC_00000364	.	-	346.50	-0.3170	0.0114	0.05042	0.0006781
1	1076871	1076932	RLOC_00000364	.	-	319.81	-0.1292	0.4024	0.5535	0.0006781
1	1077035	1077237	RLOC_00000364	.	-	526.02	-0.1112	0.5182	0.657	0.0006781
1	1077340	1078353	RLOC_00000364	.	-	1405.59	0.1493	0.02121	0.07569	0.0006781
1	1078424	1078554	RLOC_00000364	.	-	384.71	0.1910	0.03865	0.1126	0.0006781
1	1078681	1078749	RLOC_00000364	.	-	268.42	0.2185	0.01919	0.07079	0.0006781
1	1078837	1078946	RLOC_00000364	.	-	289.73	0.4378	0.0004596	0.006779	0.0006781
1	1079245	1079330	RLOC_00000364	.	-	233.60	0.6355	6.424e-06	0.0004206	0.0006781
1	1079409	1079526	RLOC_00000364	.	-	277.79	0.5963	4.919e-05	0.001682	0.0006781
1	1079619	1079781	RLOC_00000364	.	-	376.40	0.4556	0.0004779	0.006945	0.0006781
1	1080232	1080572	RLOC_00000364	.	-	362.80	0.3927	0.01144	0.05051	0.0006781
1	1086239	1086497	RLOC_00000366	.	+	8.68	-0.1248	0.9223	0.9531	0.005926
1	1087369	1087513	RLOC_00000366	.	+	10.51	1.9343	0.0001946	0.003981	0.005926
1	1087656	1087802	RLOC_00000366	.	+	9.31	1.9771	0.0002732	0.004904	0.005926
1	1087889	1088049	RLOC_00000366	.	+	10.89	1.6796	0.0001371	0.003201	0.005926
1	1088250	1088309	RLOC_00000366	.	+	8.50	0.9745	0.03815	0.1116	0.005926
1	1088410	1088570	RLOC_00000366	.	+	13.33	1.1114	0.005909	0.03303	0.005926
1	1088663	1088813	RLOC_00000366	.	+	12.82	0.7769	0.01363	0.05664	0.005926
1	1088894	1089031	RLOC_00000366	.	+	11.47	0.5026	0.1402	0.2692	0.005926
1	1089120	1089267	RLOC_00000366	.	+	12.48	0.1463	0.5644	0.696	0.005926
1	1089392	1089494	RLOC_00000366	.	+	6.47	0.5733	0.1499	0.2818	0.005926
1	1089911	1089969	RLOC_00000366	.	+	6.04	0.6065	0.1292	0.2547	0.005926
1	1090060	1090162	RLOC_00000366	.	+	7.41	0.5463	0.1083	0.2256	0.005926
1	1090580	1090693	RLOC_00000366	.	+	9.49	0.5466	0.1901	0.3315	0.005926
1	1090863	1090982	RLOC_00000366	.	+	9.38	1.2161	0.01011	0.04657	0.005926
1	1091073	1091205	RLOC_00000366	.	+	11.07	1.0374	0.01554	0.06182	0.005926
1	1091303	1091413	RLOC_00000366	.	+	11.81	0.4743	0.2575	0.4089	0.005926
1	1091501	1091562	RLOC_00000366	.	+	7.08	0.1102	0.5081	0.6484	0.005926
1	1091670	1091833	RLOC_00000366	.	+	14.95	-0.1384	0.9074	0.9437	0.005926
1	1091925	1091987	RLOC_00000366	.	+	11.88	0.1827	0.5364	0.6727	0.005926
1	1091987	1092131	RLOC_00000366	.	+	15.22	0.9998	0.003624	0.02415	0.005926
1	1092301	1092353	RLOC_00000366	.	+	11.67	0.8712	0.01825	0.06857	0.005926
1	1092353	1092421	RLOC_00000366	.	+	15.50	0.3034	0.4486	0.5959	0.005926
1	1092571	1092670	RLOC_00000366	.	+	14.94	0.2795	0.7041	0.8046	0.005926
1	1092775	1092888	RLOC_00000366	.	+	12.94	0.5062	0.2898	0.4433	0.005926
1	1092888	1092988	RLOC_00000366	.	+	12.74	0.9051	0.05129	0.1364	0.005926
1	1093108	1093248	RLOC_00000366	.	+	18.64	0.3083	0.4603	0.6063	0.005926
1	1093335	1093450	RLOC_00000366	.	+	21.30	-0.3897	0.2414	0.3909	0.005926
1	1093691	1093742	RLOC_00000366	.	+	16.39	-0.7497	0.03986	0.115	0.005926
1	1093824	1093995	RLOC_00000366	.	+	18.99	-0.5237	0.05697	0.1463	0.005926
1	1094311	1094464	RLOC_00000366	.	+	23.15	-0.7767	0.002517	0.01922	0.005926
1	1094550	1094742	RLOC_00000366	.	+	20.48	-0.3719	0.4024	0.5535	0.005926
1	1094900	1095029	RLOC_00000366	.	+	18.93	-0.3025	0.4795	0.6235	0.005926
1	1095106	1095177	RLOC_00000366	.	+	25.75	-0.6873	0.01198	0.05205	0.005926
1	1095346	1095443	RLOC_00000366	.	+	26.71	-0.6848	0.01993	0.07261	0.005926
1	1095517	1095574	RLOC_00000366	.	+	25.83	-0.6235	0.04167	0.1185	0.005926
1	1095664	1095721	RLOC_00000366	.	+	22.94	-0.5452	0.04752	0.1295	0.005926
1	1095803	1095967	RLOC_00000366	.	+	39.75	-0.8322	0.0005318	0.007406	0.005926
1	1096034	1096328	RLOC_00000366	.	+	36.45	-0.7980	0.0009784	0.01077	0.005926
1	1096968	1097120	RLOC_00000367	.	+	116.65	0.4429	0.0003456	0.005662	0.0114
1	1097395	1097532	RLOC_00000367	.	+	250.38	0.5410	0.0005045	0.007176	0.0114
1	1097618	1097680	RLOC_00000367	.	+	270.11	0.3619	0.0009826	0.01079	0.0114
1	1097797	1097913	RLOC_00000367	.	+	333.87	0.3286	0.001846	0.01578	0.0114
1	1097998	1098102	RLOC_00000367	.	+	343.10	0.1588	0.06876	0.1661	0.0114
1	1098377	1098606	RLOC_00000367	.	+	473.97	0.2289	0.02187	0.07722	0.0114
1	1098717	1098937	RLOC_00000367	.	+	536.03	-0.1327	0.8538	0.9084	0.0114
1	1099035	1099297	RLOC_00000367	.	+	710.04	-0.3059	0.008502	0.04174	0.0114
1	1099398	1099939	RLOC_00000367	.	+	1158.35	-0.7335	0.001726	0.01519	0.0114
1	1104529	1104911	RLOC_00000368	.	+	66.82	0.2574	0.2629	0.4148	0.09294
1	1104911	1105288	RLOC_00000368	.	+	82.99	0.3966	0.02682	0.08833	0.09294
1	1105388	1105709	RLOC_00000368	.	+	82.19	-0.0898	0.6865	0.7914	0.09294
1	1105709	1106115	RLOC_00000368	.	+	90.15	-0.5112	0.006163	0.03391	0.09294
1	1106440	1106694	RLOC_00000369	.	-	253.05	-0.4164	0.1453	0.2759	0.4126
1	1106855	1107010	RLOC_00000369	.	-	260.17	-0.1552	0.3199	0.4739	0.4126
1	1107055	1107190	RLOC_00000369	.	-	215.61	0.1192	0.1481	0.2796	0.4126
1	1107267	1107447	RLOC_00000369	.	-	225.55	0.1065	0.1538	0.2867	0.4126
1	1107555	1107729	RLOC_00000369	.	-	213.43	-0.1364	0.2383	0.3873	0.4126
1	1107819	1107872	RLOC_00000369	.	-	165.83	-0.0755	0.6761	0.7838	0.4126
1	1107983	1108078	RLOC_00000369	.	-	194.50	0.1014	0.2651	0.4172	0.4126
1	1108399	1108704	RLOC_00000369	.	-	201.80	0.2591	0.05022	0.1345	0.4126
1	1109491	1109865	RLOC_00000370	.	+	76.20	0.4114	0.00373	0.02457	0.01505
1	1109983	1110223	RLOC_00000370	.	+	64.27	0.7173	0.0005091	0.007211	0.01505
1	1110299	1110363	RLOC_00000370	.	+	33.53	0.5167	0.02792	0.09057	0.01505
1	1110456	1110586	RLOC_00000370	.	+	48.24	0.4707	0.01533	0.0613	0.01505
1	1110677	1111228	RLOC_00000370	.	+	123.07	0.1786	0.1258	0.2502	0.01505
1	1111304	1111392	RLOC_00000370	.	+	69.54	0.0408	0.4933	0.6354	0.01505
1	1111522	1111625	RLOC_00000370	.	+	64.92	-0.0281	0.9012	0.9396	0.01505
1	1111790	1111919	RLOC_00000370	.	+	68.07	0.2096	0.35	0.5039	0.01505
1	1112000	1112114	RLOC_00000370	.	+	77.10	0.0379	0.5824	0.7107	0.01505
1	1112290	1112409	RLOC_00000370	.	+	75.28	-0.1062	0.8778	0.9241	0.01505
1	1112499	1112590	RLOC_00000370	.	+	83.60	-0.1731	0.6983	0.8004	0.01505
1	1112688	1112781	RLOC_00000370	.	+	81.59	-0.0956	0.8062	0.8773	0.01505
1	1112860	1113191	RLOC_00000370	.	+	158.75	-0.1743	0.2283	0.376	0.01505
1	1113300	1113392	RLOC_00000370	.	+	114.93	-0.5065	0.0007708	0.009329	0.01505
1	1113506	1114045	RLOC_00000370	.	+	154.26	-0.5531	0.005068	0.02993	0.01505
1	1114369	1115192	RLOC_00000371	.	+	244.60	0.4590	0.001329	0.01294	0.01607
1	1115556	1115821	RLOC_00000371	.	+	140.48	0.7665	0.0005602	0.007649	0.01607
1	1115937	1116101	RLOC_00000371	.	+	122.69	0.2506	0.1012	0.2155	0.01607
1	1116225	1116961	RLOC_00000371	.	+	370.18	0.2413	0.05143	0.1366	0.01607
1	1117052	1117482	RLOC_00000371	.	+	254.98	0.0858	0.4074	0.5583	0.01607
1	1117574	1117756	RLOC_00000371	.	+	170.23	-0.1017	0.3771	0.5295	0.01607
1	1117988	1118145	RLOC_00000371	.	+	178.41	-0.1940	0.08469	0.1913	0.01607
1	1118222	1118448	RLOC_00000371	.	+	215.68	-0.1346	0.2194	0.3659	0.01607
1	1118530	1118897	RLOC_00000371	.	+	305.55	-0.1667	0.08487	0.1915	0.01607
1	1118967	1119069	RLOC_00000371	.	+	142.04	0.0406	0.6499	0.764	0.01607
1	1119152	1119695	RLOC_00000371	.	+	403.84	-0.5351	0.002787	0.02049	0.01607
1	1119734	1120671	RLOC_00000372	.	-	251.49	-0.3477	0.02128	0.07585	0.1845
1	1121058	1121265	RLOC_00000372	.	-	6.34	1.4686	0.01547	0.06167	0.1845
1	1121715	1122457	RLOC_00000372	.	-	119.11	0.1271	0.07716	0.1796	0.1845
1	1125563	1125728	RLOC_00000374	.	+	73.14	-0.1307	0.3261	0.48	0.289
1	1125994	1126124	RLOC_00000374	.	+	86.24	0.1268	0.3124	0.4664	0.289
1	1126232	1126363	RLOC_00000374	.	+	74.08	0.3858	0.02919	0.09335	0.289
1	1126534	1126673	RLOC_00000374	.	+	92.43	0.0677	0.5287	0.6662	0.289
1	1126847	1126962	RLOC_00000374	.	+	100.75	0.0476	0.5507	0.6844	0.289
1	1127192	1127256	RLOC_00000374	.	+	93.52	-0.0246	0.8995	0.9385	0.289
1	1127432	1127673	RLOC_00000374	.	+	138.24	-0.1341	0.2336	0.3822	0.289
1	1127822	1128142	RLOC_00000374	.	+	86.89	-0.2324	0.2777	0.4305	0.289
1	1128743	1128836	RLOC_00000374	.	+	8.79	-0.4806	0.3038	0.4575	0.289
1	1128887	1128966	RLOC_00000374	.	+	5.13	0.1962	0.7824	0.8611	0.289
1	1129134	1129271	RLOC_00000374	.	+	23.32	-0.1122	0.8422	0.9009	0.289
1	1128184	1129052	RLOC_00000375	.	-	1761.76	-0.0512	0.254	0.405	0.4126
1	1129052	1129133	RLOC_00000375	.	-	12.35	-0.9190	0.05022	0.1345	0.4126
1	1129133	1129443	RLOC_00000375	.	-	763.28	0.1044	0.1861	0.3267	0.4126
1	1136271	1136621	RLOC_00000377	.	+	906.69	0.2012	0.09344	0.2042	0.5862
1	1136933	1137146	RLOC_00000377	.	+	1047.73	0.0508	0.6114	0.7341	0.5862
1	1137458	1137598	RLOC_00000377	.	+	979.16	-0.0642	0.2671	0.4193	0.5862
1	1137739	1137822	RLOC_00000377	.	+	652.86	-0.0338	0.4026	0.5537	0.5862
1	1137944	1138009	RLOC_00000377	.	+	4.72	0.0047	0.8814	0.9265	0.5862
1	1138302	1138578	RLOC_00000377	.	+	649.17	-0.0888	0.1472	0.2783	0.5862
1	1140599	1141356	RLOC_00000378	.	-	553.38	0.1343	0.1595	0.2941	0.5068
1	1141605	1142135	RLOC_00000378	.	-	5102.19	-0.0907	0.07114	0.1699	0.5068
1	1142218	1142575	RLOC_00000378	.	-	24.29	0.1756	0.6737	0.7819	0.5068
1	1142575	1142635	RLOC_00000378	.	-	2616.30	-0.0285	0.674	0.7821	0.5068
1	1142718	1142870	RLOC_00000378	.	-	3493.72	0.0218	0.4309	0.5798	0.5068
1	1142956	1143039	RLOC_00000378	.	-	1876.28	0.1030	0.1395	0.2683	0.5068
1	1143531	1143979	RLOC_00000379	.	-	663.79	-0.6634	0.004752	0.02868	0.04023
1	1143979	1144125	RLOC_00000379	.	-	582.07	-0.5007	0.04104	0.1173	0.04023
1	1144232	1144561	RLOC_00000379	.	-	744.74	-0.4463	0.03894	0.1132	0.04023
1	1144654	1144784	RLOC_00000379	.	-	330.04	-0.0139	0.4262	0.5753	0.04023
1	1144873	1145096	RLOC_00000379	.	-	382.19	-0.0065	0.4782	0.6223	0.04023
1	1145293	1145362	RLOC_00000379	.	-	207.76	-0.0082	0.5655	0.6969	0.04023
1	1145496	1145749	RLOC_00000379	.	-	343.68	0.0509	0.194	0.3361	0.04023
1	1146140	1146674	RLOC_00000379	.	-	288.74	0.2187	0.03764	0.1106	0.04023
1	1147569	1147864	RLOC_00000379	.	-	268.96	-0.5184	0.04671	0.128	0.04023
1	1147947	1148462	RLOC_00000379	.	-	523.62	-0.6619	0.009208	0.0439	0.04023
1	1148635	1150319	RLOC_00000379	.	-	1161.88	-0.0534	0.7254	0.82	0.04023
1	1150391	1150884	RLOC_00000379	.	-	410.63	0.2758	0.009792	0.04565	0.04023
1	1150966	1151119	RLOC_00000379	.	-	261.79	-0.0716	0.8455	0.9031	0.04023
1	1151211	1151325	RLOC_00000379	.	-	226.89	0.0545	0.2088	0.3535	0.04023
1	1151502	1151851	RLOC_00000379	.	-	303.53	0.5283	0.002091	0.01709	0.04023
1	1151937	1152053	RLOC_00000379	.	-	18.56	0.4938	0.06529	0.1605	0.04023
1	1152155	1152316	RLOC_00000379	.	-	11.39	0.9875	0.02715	0.08903	0.04023
1	1152316	1152475	RLOC_00000379	.	-	203.83	0.6772	0.002087	0.01707	0.04023
1	1152676	1152809	RLOC_00000379	.	-	146.56	0.6817	0.04683	0.1282	0.04023
1	1152878	1152951	RLOC_00000379	.	-	77.43	0.5993	0.01274	0.0542	0.04023
1	1153022	1153124	RLOC_00000379	.	-	64.41	0.6101	0.01045	0.04756	0.04023
1	1153124	1153177	RLOC_00000379	.	-	3.87	0.1498	0.6134	0.7358	0.04023
1	1153199	1153345	RLOC_00000379	.	-	88.88	0.7400	0.002012	0.01668	0.04023
1	1153716	1153940	RLOC_00000379	.	-	128.54	0.6195	0.003988	0.02567	0.04023
1	1154495	1154588	RLOC_00000379	.	-	49.02	0.3246	0.05191	0.1375	0.04023
1	1154891	1155277	RLOC_00000379	.	-	72.33	-0.2475	0.4158	0.5659	0.04023
1	1155349	1156417	RLOC_00000379	.	-	140.22	0.0129	0.3002	0.4539	0.04023
1	1156417	1157139	RLOC_00000379	.	-	60.69	0.4484	0.01526	0.0611	0.04023
1	1157545	1157751	RLOC_00000379	.	-	14.78	0.9778	0.004357	0.02714	0.04023
1	1147780	1147859	RLOC_00000380	.	+	5.67	0.4938	0.3687	0.5216	0.5096
1	1147938	1148072	RLOC_00000380	.	+	9.55	0.3768	0.1525	0.2851	0.5096
1	1148151	1148368	RLOC_00000380	.	+	17.99	-0.5044	0.07182	0.171	0.5096
1	1162979	1163452	RLOC_00000383	.	-	200.10	-0.0639	0.9336	0.96	0.6258
1	1163605	1163705	RLOC_00000383	.	-	170.03	-0.0565	0.5051	0.6455	0.6258
1	1163790	1163881	RLOC_00000383	.	-	161.61	0.0113	0.9615	0.9771	0.6258
1	1163971	1164086	RLOC_00000383	.	-	198.12	0.1459	0.3333	0.4876	0.6258
1	1164669	1164846	RLOC_00000383	.	-	173.03	0.0324	0.951	0.9706	0.6258
1	1165329	1165443	RLOC_00000383	.	-	6.57	-0.9866	0.1064	0.2229	0.6258
1	1165627	1165735	RLOC_00000383	.	-	7.19	0.1329	0.9328	0.9594	0.6258
1	1165180	1166194	RLOC_00000384	.	+	2111.40	0.2382	0.00754	0.03849	0.108
1	1166279	1166769	RLOC_00000384	.	+	1465.14	-0.2418	0.007675	0.03896	0.108
1	1179379	1180110	RLOC_00000389	.	-	136.67	-0.5765	0.003544	0.02382	0.05969
1	1180478	1180631	RLOC_00000389	.	-	57.06	-0.1141	0.8254	0.8901	0.05969
1	1180716	1181841	RLOC_00000389	.	-	166.02	-0.0869	0.5917	0.7183	0.05969
1	1181937	1182380	RLOC_00000389	.	-	58.80	0.1286	0.3098	0.4637	0.05969
1	1182453	1182587	RLOC_00000389	.	-	28.70	0.1017	0.4045	0.5555	0.05969
1	1182690	1183198	RLOC_00000389	.	-	64.40	0.5962	0.003415	0.02325	0.05969
1	1183301	1183428	RLOC_00000389	.	-	29.88	0.3651	0.09751	0.2102	0.05969
1	1183529	1183680	RLOC_00000389	.	-	22.37	0.4781	0.09054	0.1999	0.05969
1	1185559	1186401	RLOC_00000390	.	-	3178.73	-0.3335	0.001941	0.01629	0.004712
1	1186401	1187485	RLOC_00000390	.	-	3705.78	-0.0770	0.4995	0.6408	0.004712
1	1187588	1188007	RLOC_00000390	.	-	1495.77	0.1652	0.000298	0.005186	0.004712
1	1188007	1188073	RLOC_00000390	.	-	7.91	0.9362	0.02147	0.0763	0.004712
1	1188128	1188534	RLOC_00000390	.	-	434.93	0.3828	9.79e-05	0.00259	0.004712
1	1189039	1189952	RLOC_00000391	.	-	8452.67	-0.3216	0.02742	0.08958	0.2177
1	1190027	1190309	RLOC_00000391	.	-	7401.48	-0.0362	0.4674	0.6127	0.2177
1	1190421	1190642	RLOC_00000391	.	-	4953.71	0.0548	0.01943	0.07134	0.2177
1	1190744	1190910	RLOC_00000391	.	-	4026.15	0.1177	0.0645	0.1591	0.2177
1	1191223	1191384	RLOC_00000391	.	-	2714.80	0.1734	0.04058	0.1163	0.2177
1	1191600	1191858	RLOC_00000392	.	+	853.37	0.2942	0.0007924	0.009476	0.001944
1	1191938	1192034	RLOC_00000392	.	+	789.77	0.2157	0.0002702	0.004876	0.001944
1	1192213	1192297	RLOC_00000392	.	+	709.97	0.1927	2.775e-05	0.001151	0.001944
1	1192410	1192582	RLOC_00000392	.	+	864.50	0.1168	0.001788	0.01551	0.001944
1	1192712	1192837	RLOC_00000392	.	+	866.68	-0.0540	0.8077	0.8782	0.001944
1	1192923	1193060	RLOC_00000392	.	+	1030.93	-0.2295	0.01766	0.06714	0.001944
1	1193140	1193329	RLOC_00000392	.	+	1371.11	-0.2426	0.01555	0.06185	0.001944
1	1193457	1193884	RLOC_00000392	.	+	1731.42	-0.4135	0.005119	0.03013	0.001944
1	1194195	1194277	RLOC_00000393	.	+	7.99	1.1562	0.01974	0.07214	0.2202
1	1195050	1195551	RLOC_00000393	.	+	70.59	0.0008	0.8164	0.884	0.2202
1	1196636	1196900	RLOC_00000393	.	+	60.53	-0.1763	0.1776	0.3165	0.2202
1	1198124	1198326	RLOC_00000394	.	+	248.58	0.4958	0.0002661	0.00483	0.001751
1	1198786	1199115	RLOC_00000394	.	+	577.96	0.3385	2.388e-05	0.001044	0.001751
1	1199196	1199363	RLOC_00000394	.	+	495.82	0.2421	0.0004663	0.006837	0.001751
1	1199458	1199641	RLOC_00000394	.	+	444.03	0.2354	0.02084	0.07482	0.001751
1	1199709	1200304	RLOC_00000394	.	+	1202.35	-0.0339	0.5301	0.6674	0.001751
1	1200423	1200541	RLOC_00000394	.	+	522.76	-0.1590	0.2718	0.4245	0.001751
1	1200641	1200865	RLOC_00000394	.	+	927.09	-0.2838	0.0005328	0.007409	0.001751
1	1200960	1201515	RLOC_00000394	.	+	1203.69	-0.4352	0.01198	0.05205	0.001751
1	1202206	1202891	RLOC_00000395	.	+	303.62	0.5409	2.314e-08	4.889e-06	7.806e-06
1	1203103	1203196	RLOC_00000395	.	+	163.53	0.2258	0.02158	0.07656	7.806e-06
1	1203271	1203420	RLOC_00000395	.	+	214.85	0.2086	0.04862	0.1316	7.806e-06
1	1203494	1203591	RLOC_00000395	.	+	220.23	0.2440	0.027	0.08871	7.806e-06
1	1203694	1203769	RLOC_00000395	.	+	228.55	0.2212	0.03391	0.1032	7.806e-06
1	1203842	1204107	RLOC_00000395	.	+	353.83	0.0357	0.2802	0.4331	7.806e-06
1	1204179	1204268	RLOC_00000395	.	+	342.52	-0.1207	0.403	0.5541	7.806e-06
1	1204392	1204521	RLOC_00000395	.	+	383.87	0.0132	0.5011	0.6421	7.806e-06
1	1204616	1205062	RLOC_00000395	.	+	559.19	-0.1324	0.2685	0.4209	7.806e-06
1	1205114	1205251	RLOC_00000395	.	+	529.32	-0.2678	0.002249	0.0179	7.806e-06
1	1205251	1205384	RLOC_00000395	.	+	12.90	-1.1499	0.003482	0.02354	7.806e-06
1	1205384	1205825	RLOC_00000395	.	+	696.83	-0.3532	0.0003455	0.005662	7.806e-06
1	1216111	1216241	RLOC_00000401	.	+	716.38	-0.0025	0.6784	0.7853	1
1	1216241	1217437	RLOC_00000401	.	+	3191.20	0.0020	0.6742	0.7823	1
1	1218307	1218414	RLOC_00000405	.	-	5.42	-0.9216	0.02534	0.08507	0.2621
1	1218969	1219066	RLOC_00000405	.	-	3.40	1.1952	0.03268	0.1007	0.2621
1	1226577	1226761	RLOC_00000407	.	+	134.34	0.4956	0.002387	0.01859	0.04577
1	1226851	1226937	RLOC_00000407	.	+	176.73	0.4076	0.008913	0.043	0.04577
1	1227086	1227158	RLOC_00000407	.	+	153.32	0.4513	0.01093	0.04899	0.04577
1	1227246	1227309	RLOC_00000407	.	+	144.67	0.4948	0.005996	0.03334	0.04577
1	1227579	1227666	RLOC_00000407	.	+	161.73	0.0611	0.4694	0.6145	0.04577
1	1227814	1227957	RLOC_00000407	.	+	192.48	-0.1395	0.4733	0.6179	0.04577
1	1228045	1228167	RLOC_00000407	.	+	183.47	-0.0142	0.9138	0.9479	0.04577
1	1228330	1228447	RLOC_00000407	.	+	174.77	0.2010	0.03113	0.09747	0.04577
1	1228705	1228801	RLOC_00000407	.	+	186.26	0.2299	0.06386	0.1581	0.04577
1	1228896	1228956	RLOC_00000407	.	+	194.83	-0.0025	0.8348	0.8961	0.04577
1	1229052	1229128	RLOC_00000407	.	+	221.70	-0.1283	0.3254	0.4794	0.04577
1	1229232	1229338	RLOC_00000407	.	+	266.37	-0.0852	0.5771	0.7062	0.04577
1	1229503	1229624	RLOC_00000407	.	+	280.20	0.0542	0.4602	0.6062	0.04577
1	1229715	1229794	RLOC_00000407	.	+	272.25	-0.1366	0.2029	0.3466	0.04577
1	1229892	1229977	RLOC_00000407	.	+	274.71	-0.2366	0.06323	0.1571	0.04577
1	1230063	1230116	RLOC_00000407	.	+	230.25	-0.2707	0.05141	0.1366	0.04577
1	1230301	1230375	RLOC_00000407	.	+	258.69	-0.2659	0.09311	0.2037	0.04577
1	1230463	1230805	RLOC_00000407	.	+	371.54	-0.3205	0.03086	0.0969	0.04577
1	1231595	1231925	RLOC_00000408	.	+	56.39	0.8528	0.001768	0.01541	0.03662
1	1231925	1232272	RLOC_00000408	.	+	84.96	0.3624	0.09199	0.2021	0.03662
1	1232604	1232991	RLOC_00000408	.	+	121.02	-0.2886	0.02338	0.08065	0.03662
1	1233492	1233600	RLOC_00000408	.	+	58.61	-0.2800	0.2131	0.3585	0.03662
1	1233779	1233978	RLOC_00000408	.	+	45.48	-0.3669	0.3401	0.4941	0.03662
1	1234185	1234505	RLOC_00000409	.	-	700.25	-0.1377	0.2861	0.4394	0.2014
1	1234603	1234760	RLOC_00000409	.	-	825.66	-0.1806	0.01745	0.06666	0.2014
1	1234992	1235110	RLOC_00000409	.	-	697.76	-0.0439	0.1786	0.3178	0.2014
1	1235184	1235358	RLOC_00000409	.	-	802.39	0.1372	0.03701	0.1094	0.2014
1	1235454	1236079	RLOC_00000409	.	-	1253.28	0.1643	0.1008	0.2149	0.2014
1	1236838	1237052	RLOC_00000410	.	-	8.11	-0.7734	0.04061	0.1164	0.2944
1	1237290	1237547	RLOC_00000410	.	-	18.14	-0.1053	0.5683	0.6992	0.2944
1	1237607	1237968	RLOC_00000410	.	-	13.72	0.6818	0.03	0.09502	0.2944
1	1238528	1238728	RLOC_00000410	.	-	7.99	-0.1044	0.8781	0.9243	0.2944
1	1240390	1240784	RLOC_00000412	.	+	334.43	0.2490	0.03856	0.1124	0.3481
1	1240997	1241677	RLOC_00000412	.	+	667.05	-0.0115	0.8456	0.9031	0.3481
1	1241760	1242133	RLOC_00000412	.	+	357.54	-0.2449	0.1003	0.2142	0.3481
1	1242641	1242896	RLOC_00000413	.	+	83.67	0.1937	0.3539	0.5077	0.8882
1	1243441	1243512	RLOC_00000413	.	+	71.36	0.0834	0.6507	0.7646	0.8882
1	1243607	1243743	RLOC_00000413	.	+	100.40	-0.0912	0.275	0.4278	0.8882
1	1243851	1244113	RLOC_00000413	.	+	86.60	-0.0899	0.7743	0.8554	0.8882
1	1244974	1245199	RLOC_00000414	.	+	63.93	-0.0210	0.7702	0.8526	0.8366
1	1245291	1245469	RLOC_00000414	.	+	78.17	0.1055	0.3299	0.4841	0.8366
1	1245635	1245931	RLOC_00000414	.	+	82.78	-0.1328	0.2228	0.3697	0.8366
1	1245931	1246002	RLOC_00000414	.	+	9.35	0.3235	0.7046	0.805	0.8366
1	1246872	1247095	RLOC_00000415	.	-	10.98	-0.5463	0.1017	0.2163	0.01595
1	1247148	1247537	RLOC_00000415	.	-	21.32	-0.4450	0.03085	0.09688	0.01595
1	1247931	1248003	RLOC_00000415	.	-	4.78	-0.1555	0.6159	0.7379	0.01595
1	1248148	1248719	RLOC_00000415	.	-	17.16	1.4239	0.0005545	0.007592	0.01595
1	1258609	1258899	RLOC_00000416	.	-	174.18	-0.3287	0.04764	0.1297	0.1549
1	1259026	1259221	RLOC_00000416	.	-	196.08	-0.2543	0.07312	0.1731	0.1549
1	1259221	1259301	RLOC_00000416	.	-	3.80	0.5553	0.396	0.5476	0.1549
1	1259357	1259570	RLOC_00000416	.	-	160.51	-0.2087	0.08762	0.1956	0.1549
1	1259727	1259871	RLOC_00000416	.	-	106.14	0.0705	0.4304	0.5793	0.1549
1	1260011	1260125	RLOC_00000416	.	-	104.08	0.2806	0.01223	0.05275	0.1549
1	1260524	1260626	RLOC_00000416	.	-	103.77	0.2590	0.03956	0.1144	0.1549
1	1260745	1260808	RLOC_00000416	.	-	79.66	0.3662	0.05628	0.1451	0.1549
1	1261269	1261414	RLOC_00000416	.	-	73.04	0.1116	0.4518	0.5987	0.1549
1	1279824	1279919	RLOC_00000418	.	+	7.77	1.4375	0.001005	0.01093	0.02445
1	1279942	1280237	RLOC_00000418	.	+	23.28	0.4414	0.06173	0.1545	0.02445
1	1280399	1280565	RLOC_00000418	.	+	19.37	-0.2650	0.406	0.5569	0.02445
1	1280565	1280746	RLOC_00000418	.	+	12.78	-0.6952	0.1297	0.2554	0.02445
1	1281126	1281513	RLOC_00000418	.	+	24.44	-0.8461	0.04008	0.1154	0.02445
1	1282711	1282961	RLOC_00000419	.	-	60.66	-0.7034	0.006742	0.03589	0.09946
1	1283042	1283162	RLOC_00000419	.	-	50.84	0.3478	0.04688	0.1283	0.09946
1	1283257	1283322	RLOC_00000419	.	-	58.40	0.0977	0.4211	0.5708	0.09946
1	1283482	1283540	RLOC_00000419	.	-	50.61	-0.1023	0.7344	0.8269	0.09946
1	1283638	1283708	RLOC_00000419	.	-	50.26	-0.0179	0.8705	0.9194	0.09946
1	1283793	1283873	RLOC_00000419	.	-	41.55	0.1745	0.4058	0.5568	0.09946
1	1284100	1284162	RLOC_00000419	.	-	45.52	-0.1500	0.386	0.5381	0.09946
1	1284355	1284453	RLOC_00000419	.	-	54.72	-0.0592	0.788	0.8649	0.09946
1	1284627	1284690	RLOC_00000419	.	-	47.05	-0.1456	0.4475	0.5949	0.09946
1	1284789	1284841	RLOC_00000419	.	-	40.40	-0.2345	0.2186	0.3649	0.09946
1	1284925	1285004	RLOC_00000419	.	-	41.01	-0.1678	0.6251	0.745	0.09946
1	1285284	1285369	RLOC_00000419	.	-	41.47	0.0680	0.6835	0.789	0.09946
1	1285515	1285627	RLOC_00000419	.	-	45.63	0.1600	0.3343	0.4885	0.09946
1	1285718	1285803	RLOC_00000419	.	-	39.47	0.4967	0.0328	0.1009	0.09946
1	1285895	1286001	RLOC_00000419	.	-	38.94	0.4257	0.08326	0.1892	0.09946
1	1286410	1286500	RLOC_00000419	.	-	22.20	0.1440	0.5843	0.7123	0.09946
1	1289737	1290065	RLOC_00000420	.	-	590.81	-0.2159	0.06154	0.1542	0.03319
1	1290065	1290151	RLOC_00000420	.	-	20.46	-1.1184	0.001545	0.01418	0.03319
1	1290151	1290225	RLOC_00000420	.	-	452.31	0.1064	0.2989	0.4526	0.03319
1	1290771	1291083	RLOC_00000420	.	-	649.59	0.1766	0.124	0.2477	0.03319
1	1291327	1291920	RLOC_00000421	.	+	39.12	0.0273	0.8607	0.9129	1
1	1292114	1293362	RLOC_00000421	.	+	1108.66	-0.0084	0.87	0.9191	1
1	1294869	1295775	RLOC_00000423	.	-	64.57	-0.8790	0.0001667	0.003629	0.006811
1	1295940	1296529	RLOC_00000423	.	-	32.07	-0.1466	0.6705	0.7794	0.006811
1	1296586	1297535	RLOC_00000423	.	-	45.28	0.2121	0.1315	0.2579	0.006811
1	1297705	1297855	RLOC_00000423	.	-	11.46	0.9544	0.01003	0.04635	0.006811
1	1298121	1298256	RLOC_00000423	.	-	10.86	0.3165	0.1697	0.3069	0.006811
1	1298470	1298563	RLOC_00000423	.	-	9.63	0.5464	0.0704	0.1688	0.006811
1	1298855	1298918	RLOC_00000423	.	-	6.01	1.1051	0.02091	0.07499	0.006811
1	1300516	1300826	RLOC_00000425	.	-	12.41	-0.2759	0.3297	0.4839	0.9104
1	1300938	1301331	RLOC_00000425	.	-	24.03	0.1521	0.3058	0.4596	0.9104
1	1303589	1304280	RLOC_00000427	.	-	477.18	-0.3235	0.06577	0.1612	8.108e-06
1	1304371	1304513	RLOC_00000427	.	-	273.93	-0.2227	0.09344	0.2042	8.108e-06
1	1304619	1304725	RLOC_00000427	.	-	193.97	-0.0911	0.7263	0.8207	8.108e-06
1	1304821	1305465	RLOC_00000427	.	-	571.83	0.0098	0.3876	0.5395	8.108e-06
1	1306369	1306791	RLOC_00000427	.	-	13.95	2.0884	2.036e-06	0.000181	8.108e-06
1	1306791	1306872	RLOC_00000427	.	-	192.42	0.1399	0.1236	0.2472	8.108e-06
1	1307593	1307679	RLOC_00000427	.	-	3.67	5.8677	2.417e-08	5.08e-06	8.108e-06
1	1307679	1307867	RLOC_00000427	.	-	166.56	0.3011	0.007951	0.0399	8.108e-06
1	1313581	1314030	RLOC_00000428	.	+	1167.00	0.0885	0.1809	0.3206	0.4126
1	1314463	1314693	RLOC_00000428	.	+	1162.42	0.0479	0.2327	0.3812	0.4126
1	1314779	1314923	RLOC_00000428	.	+	922.10	0.0822	0.05998	0.1515	0.4126
1	1315040	1315208	RLOC_00000428	.	+	1003.36	-0.0626	0.6353	0.7529	0.4126
1	1315304	1315774	RLOC_00000428	.	+	1147.83	-0.3477	0.05019	0.1345	0.4126
1	1317989	1318081	RLOC_00000429	.	+	4.23	0.9364	0.1268	0.2515	0.649
1	1319626	1319710	RLOC_00000429	.	+	4.72	0.4106	0.4933	0.6353	0.649
1	1319920	1319983	RLOC_00000429	.	+	4.25	0.2747	0.5828	0.711	0.649
1	1320285	1320373	RLOC_00000429	.	+	8.92	-0.5519	0.1151	0.2352	0.649
1	1320495	1320832	RLOC_00000429	.	+	17.16	-0.1157	0.5589	0.6913	0.649
1	1321920	1322018	RLOC_00000430	.	+	54.17	0.3502	0.1096	0.2274	0.007042
1	1322256	1322322	RLOC_00000430	.	+	69.61	0.4534	0.02886	0.09265	0.007042
1	1322406	1322491	RLOC_00000430	.	+	93.72	0.4463	0.008429	0.04149	0.007042
1	1322572	1322699	RLOC_00000430	.	+	124.40	0.2489	0.03826	0.1118	0.007042
1	1322786	1322886	RLOC_00000430	.	+	111.18	0.2267	0.1102	0.2283	0.007042
1	1322966	1323034	RLOC_00000430	.	+	98.20	0.3143	0.1048	0.2208	0.007042
1	1323131	1323239	RLOC_00000430	.	+	123.89	0.3209	0.0135	0.05629	0.007042
1	1323322	1323400	RLOC_00000430	.	+	125.46	0.1987	0.1292	0.2547	0.007042
1	1323503	1323639	RLOC_00000430	.	+	187.88	0.0705	0.3513	0.5052	0.007042
1	1323730	1323829	RLOC_00000430	.	+	159.83	0.0842	0.3238	0.4778	0.007042
1	1323903	1324029	RLOC_00000430	.	+	192.02	-0.2629	0.07655	0.1787	0.007042
1	1324131	1324243	RLOC_00000430	.	+	178.95	-0.3578	0.02041	0.07378	0.007042
1	1324307	1324392	RLOC_00000430	.	+	170.94	-0.6394	0.0005002	0.007137	0.007042
1	1324479	1324756	RLOC_00000430	.	+	222.86	-0.6064	0.0001747	0.003736	0.007042
1	1325246	1325438	RLOC_00000432	.	-	26.24	-1.2672	0.002408	0.01869	0.04602
1	1325589	1325689	RLOC_00000432	.	-	25.99	-0.6114	0.2575	0.409	0.04602
1	1325854	1326093	RLOC_00000432	.	-	38.28	-0.1542	0.5211	0.6596	0.04602
1	1326193	1326253	RLOC_00000432	.	-	18.42	-0.2781	0.783	0.8616	0.04602
1	1326339	1326531	RLOC_00000432	.	-	23.89	-0.4640	0.11	0.2281	0.04602
1	1326636	1326790	RLOC_00000432	.	-	23.15	-0.2504	0.3573	0.5109	0.04602
1	1326879	1326967	RLOC_00000432	.	-	22.79	-0.1034	0.6737	0.7819	0.04602
1	1327043	1327122	RLOC_00000432	.	-	19.43	-0.0301	0.9499	0.97	0.04602
1	1327224	1327306	RLOC_00000432	.	-	18.21	0.2193	0.5112	0.6511	0.04602
1	1327393	1327491	RLOC_00000432	.	-	14.12	-0.1236	0.9628	0.9779	0.04602
1	1327571	1327640	RLOC_00000432	.	-	13.74	0.4481	0.1547	0.2879	0.04602
1	1327836	1327904	RLOC_00000432	.	-	14.36	0.5226	0.1929	0.3347	0.04602
1	1328033	1328107	RLOC_00000432	.	-	12.31	0.9519	0.1303	0.2562	0.04602
1	1328721	1328785	RLOC_00000432	.	-	7.99	1.7672	0.003824	0.02501	0.04602
1	1328785	1328882	RLOC_00000432	.	-	9.81	0.2553	0.5211	0.6596	0.04602
1	1329558	1329645	RLOC_00000432	.	-	10.70	-0.1530	0.9879	0.9929	0.04602
1	1329763	1329906	RLOC_00000432	.	-	12.78	0.8775	0.06617	0.1619	0.04602
1	1329983	1330036	RLOC_00000432	.	-	7.84	0.9002	0.1238	0.2474	0.04602
1	1330146	1330346	RLOC_00000432	.	-	11.12	-0.1090	0.8901	0.9324	0.04602
1	1330473	1330607	RLOC_00000432	.	-	14.19	0.4735	0.09074	0.2003	0.04602
1	1330679	1330809	RLOC_00000432	.	-	13.31	0.2943	0.4635	0.6091	0.04602
1	1330951	1331104	RLOC_00000432	.	-	7.74	0.6419	0.2438	0.3935	0.04602
1	1331591	1332005	RLOC_00000433	.	-	1041.47	-0.1930	0.07981	0.1837	0.5397
1	1332135	1332201	RLOC_00000433	.	-	760.88	-0.0620	0.2883	0.4416	0.5397
1	1332386	1332510	RLOC_00000433	.	-	793.74	-0.0116	0.5889	0.7159	0.5397
1	1332588	1332730	RLOC_00000433	.	-	779.63	0.1264	0.1424	0.2721	0.5397
1	1332884	1332986	RLOC_00000433	.	-	5.92	-0.2997	0.724	0.819	0.5397
1	1333046	1333109	RLOC_00000433	.	-	4.69	0.8475	0.1535	0.2864	0.5397
1	1333236	1333542	RLOC_00000433	.	-	715.45	0.2532	0.08811	0.1963	0.5397
1	1334600	1334949	RLOC_00000435	.	+	17.29	0.3385	0.241	0.3904	0.8571
1	1335331	1335473	RLOC_00000435	.	+	12.17	-0.0351	0.6176	0.7392	0.8571
1	1335562	1335683	RLOC_00000435	.	+	14.65	-0.0620	0.6397	0.7564	0.8571
1	1335767	1335830	RLOC_00000435	.	+	13.36	0.0252	0.9105	0.9459	0.8571
1	1335923	1336246	RLOC_00000435	.	+	22.78	-0.1632	0.7089	0.8079	0.8571
1	1336338	1336410	RLOC_00000436	.	-	19.15	-0.5611	0.2738	0.4265	0.2507
1	1336410	1336987	RLOC_00000436	.	-	755.49	-0.3012	0.02381	0.08159	0.2507
1	1337085	1337242	RLOC_00000436	.	-	402.27	0.0416	0.1376	0.2659	0.2507
1	1337343	1337556	RLOC_00000436	.	-	416.27	0.0758	0.1473	0.2785	0.2507
1	1337647	1337838	RLOC_00000436	.	-	244.99	0.2082	0.08716	0.1949	0.2507
1	1340594	1341259	RLOC_00000438	.	-	574.19	-0.5638	0.001109	0.01162	0.0262
1	1341339	1343203	RLOC_00000438	.	-	1148.47	0.0795	0.003844	0.02509	0.0262
1	1343203	1343693	RLOC_00000438	.	-	187.01	0.3774	0.003134	0.02204	0.0262
1	1345048	1345108	RLOC_00000439	.	+	23.69	0.6914	0.005233	0.03058	0.07957
1	1345467	1346241	RLOC_00000439	.	+	242.07	0.3284	0.03728	0.1099	0.07957
1	1346358	1346839	RLOC_00000439	.	+	252.74	-0.0583	0.6824	0.7882	0.07957
1	1346941	1347040	RLOC_00000439	.	+	128.98	-0.2951	0.09421	0.2053	0.07957
1	1347237	1347438	RLOC_00000439	.	+	162.18	-0.2636	0.06546	0.1607	0.07957
1	1347526	1347620	RLOC_00000439	.	+	99.24	-0.1091	0.6982	0.8003	0.07957
1	1347704	1347804	RLOC_00000439	.	+	112.62	-0.1838	0.3341	0.4884	0.07957
1	1347898	1347997	RLOC_00000439	.	+	121.86	-0.1343	0.413	0.5632	0.07957
1	1348080	1348438	RLOC_00000439	.	+	204.55	-0.4433	0.03805	0.1114	0.07957
1	1348729	1348860	RLOC_00000439	.	+	7.15	-0.4408	0.3348	0.4889	0.07957
1	1350197	1350449	RLOC_00000439	.	+	117.43	0.5694	0.01277	0.05429	0.07957
1	1350832	1350902	RLOC_00000439	.	+	69.46	0.6694	0.005001	0.02969	0.07957
1	1351106	1351212	RLOC_00000439	.	+	73.79	0.4386	0.02007	0.07294	0.07957
1	1351525	1351634	RLOC_00000439	.	+	86.57	0.1386	0.2603	0.412	0.07957
1	1351712	1351881	RLOC_00000439	.	+	107.07	0.3232	0.01487	0.06006	0.07957
1	1352070	1352531	RLOC_00000439	.	+	225.26	0.2997	0.01207	0.05231	0.07957
1	1352637	1352773	RLOC_00000439	.	+	147.91	0.1639	0.1316	0.258	0.07957
1	1352875	1353124	RLOC_00000439	.	+	165.90	0.2322	0.05572	0.1441	0.07957
1	1353223	1353445	RLOC_00000439	.	+	116.41	0.2614	0.03916	0.1136	0.07957
1	1353538	1353799	RLOC_00000439	.	+	204.67	-0.0426	0.975	0.9851	0.07957
[truncated: 116,949 more rows]
