# Supplementary material for: Widespread premature transcription termination of Arabidopsis thaliana NLR genes by the spen protein FPA
Source: eLife. 2021 Apr 27;10:e65537. doi: 10.7554/eLife.65537 (PMC8116057; doi:10.7554/eLife.65537)
Supplement: Figure 2—source data 8. [file elife-65537-fig2-data8.tds]

1	3912	3995	RLOC_00000001	.	+	20.78	0.0428	0.547	0.7509	0.8069
1	5094	5173	RLOC_00000001	.	+	39.47	-0.2501	0.7405	0.8725	0.8069
1	5325	5438	RLOC_00000001	.	+	26.67	-0.3814	0.4459	0.6748	0.8069
1	4604	4705	RLOC_00000001	.	+	25.01	0.0816	0.6229	0.8019	0.8069
1	4275	4485	RLOC_00000001	.	+	22.08	0.3684	0.1471	0.3634	0.8069
1	6262	6436	RLOC_00000002	.	-	3.26	4.6065	0.0002991	0.007883	0.01368
1	8463	8593	RLOC_00000002	.	-	37.19	0.0169	0.7462	0.8756	0.01368
1	12353	12423	RLOC_00000002	.	-	0.75	0.3910	0.8721	nan	0.01368
1	13172	13334	RLOC_00000002	.	-	23.44	-0.3268	0.1888	0.4199	0.01368
1	7068	7156	RLOC_00000002	.	-	152.32	-0.4268	0.02941	0.1407	0.01368
1	7648	7761	RLOC_00000002	.	-	143.96	-0.4158	0.135	0.3454	0.01368
1	7449	7563	RLOC_00000002	.	-	87.31	-0.5522	0.002325	0.02984	0.01368
1	8463	8570	RLOC_00000002	.	-	116.61	0.3864	0.05322	0.2005	0.01368
1	8324	8416	RLOC_00000002	.	-	148.04	0.5266	0.003116	0.03587	0.01368
1	7834	7941	RLOC_00000002	.	-	85.88	0.2142	0.1855	0.4155	0.01368
1	7648	8235	RLOC_00000002	.	-	1.15	1.7074	0.2367	nan	0.01368
1	7986	8235	RLOC_00000002	.	-	68.98	0.5197	0.01941	0.109	0.01368
1	7231	7383	RLOC_00000002	.	-	106.75	-0.1851	0.2011	0.4355	0.01368
1	24961	25040	RLOC_00000004	.	+	22.58	1.2555	0.0006493	0.01309	0.0009561
1	27532	27617	RLOC_00000004	.	+	26.22	0.7715	0.01167	0.0803	0.0009561
1	30815	30901	RLOC_00000004	.	+	244.68	-1.3647	7.269e-06	0.0006046	0.0009561
1	29079	29159	RLOC_00000004	.	+	77.02	-0.1871	0.7702	0.8888	0.0009561
1	27712	27802	RLOC_00000004	.	+	42.90	0.5207	0.01901	0.1078	0.0009561
1	28430	28707	RLOC_00000004	.	+	42.06	0.5847	0.03869	0.1662	0.0009561
1	27280	27371	RLOC_00000004	.	+	15.67	0.8077	0.04184	0.174	0.0009561
1	25742	25824	RLOC_00000004	.	+	21.90	0.7912	0.01247	0.08366	0.0009561
1	25434	25523	RLOC_00000004	.	+	19.95	1.0944	0.00125	0.02014	0.0009561
1	26202	26291	RLOC_00000004	.	+	27.52	0.9731	0.002629	0.03216	0.0009561
1	26451	26542	RLOC_00000004	.	+	20.98	1.1253	0.000854	0.01573	0.0009561
1	30064	30146	RLOC_00000004	.	+	142.16	-0.4387	0.2787	0.522	0.0009561
1	27011	27098	RLOC_00000004	.	+	57.66	-0.5284	0.6894	0.8425	0.0009561
1	28804	28889	RLOC_00000004	.	+	47.26	0.2157	0.1733	0.3993	0.0009561
1	27535	27617	RLOC_00000004	.	+	1.45	-0.5371	0.5326	nan	0.0009561
1	26775	26861	RLOC_00000004	.	+	49.79	-0.2465	0.848	0.9297	0.0009561
1	24450	24541	RLOC_00000004	.	+	22.09	0.4280	0.06598	0.2279	0.0009561
1	24654	24751	RLOC_00000004	.	+	27.53	-0.0537	0.5132	0.7265	0.0009561
1	25996	26080	RLOC_00000004	.	+	43.39	0.5715	0.008051	0.0643	0.0009561
1	30310	30409	RLOC_00000004	.	+	137.35	-0.4112	0.3694	0.6098	0.0009561
1	14079	31201	RLOC_00000005	.	-	0.07	nan	nan	nan	nan
1	32194	32281	RLOC_00000006	.	-	434.04	0.1770	0.1247	0.3299	0.06617
1	31423	31520	RLOC_00000006	.	-	638.18	-0.1877	0.2009	0.4352	0.06617
1	31601	31692	RLOC_00000006	.	-	765.43	-0.3587	0.002627	0.03216	0.06617
1	32346	32430	RLOC_00000006	.	-	466.30	0.2067	0.002527	0.03142	0.06617
1	32458	32546	RLOC_00000006	.	-	500.29	0.1176	0.03788	0.1641	0.06617
1	31997	32087	RLOC_00000006	.	-	490.87	0.0317	0.5259	0.7356	0.06617
1	32669	33028	RLOC_00000006	.	-	465.95	0.2223	0.07387	0.243	0.06617
1	31812	31932	RLOC_00000006	.	-	538.42	-0.2623	0.03052	0.1438	0.06617
1	32669	32838	RLOC_00000006	.	-	0.00	nan	nan	nan	0.06617
1	32458	32546	RLOC_00000007	.	+	0.35	-0.0000	1	nan	nan
1	32669	33028	RLOC_00000007	.	+	0.35	0.0000	1	nan	nan
1	36920	37022	RLOC_00000008	.	-	149.61	0.7889	3.336e-05	0.001816	0.002881
1	37202	37372	RLOC_00000008	.	-	106.37	0.2868	0.1944	0.4272	0.002881
1	35962	36623	RLOC_00000008	.	-	287.97	-0.2360	0.3366	0.5801	0.002881
1	33588	33980	RLOC_00000008	.	-	0.46	1.5457	0.4649	nan	0.002881
1	35473	35566	RLOC_00000008	.	-	152.32	-0.1317	0.7021	0.8502	0.002881
1	35646	35729	RLOC_00000008	.	-	242.26	0.1989	0.05627	0.2075	0.002881
1	34326	34400	RLOC_00000008	.	-	433.88	-0.7659	0.002247	0.02917	0.002881
1	36684	36809	RLOC_00000008	.	-	201.18	-0.0207	0.6541	0.8209	0.002881
1	35998	36089	RLOC_00000008	.	-	0.00	nan	nan	nan	0.002881
1	36170	36623	RLOC_00000008	.	-	0.00	nan	nan	nan	0.002881
1	35470	35566	RLOC_00000008	.	-	94.76	-0.2158	0.527	0.7363	0.002881
1	37397	37568	RLOC_00000008	.	-	103.33	0.1214	0.422	0.6554	0.002881
1	37202	37301	RLOC_00000008	.	-	5.98	0.9144	0.2479	0.4892	0.002881
1	39286	39408	RLOC_00000009	.	-	41.28	-0.1999	0.3143	0.5582	0.9434
1	39053	39135	RLOC_00000009	.	-	57.41	-0.0214	0.9556	0.9813	0.9434
1	40534	40674	RLOC_00000009	.	-	47.79	0.1166	0.5246	0.7346	0.9434
1	39813	40212	RLOC_00000009	.	-	33.48	0.3270	0.2639	0.5066	0.9434
1	40328	40472	RLOC_00000009	.	-	43.62	-0.1588	0.5414	0.7469	0.9434
1	34803	50552	RLOC_00000010	.	-	0.07	-0.0841	0.9067	nan	nan
1	50630	50882	RLOC_00000010	.	-	0.07	-0.0840	0.9067	nan	nan
1	36874	50320	RLOC_00000010	.	-	0.08	0.0797	0.9067	nan	nan
1	50336	50418	RLOC_00000010	.	-	0.08	0.0797	0.9067	nan	nan
1	47981	48074	RLOC_00000011	.	-	2057.17	-0.0005	0.2436	0.4846	0.0004741
1	46144	46372	RLOC_00000011	.	-	0.47	-11.4993	0.7583	nan	0.0004741
1	48851	48935	RLOC_00000011	.	-	878.90	0.6860	2.806e-06	0.0002971	0.0004741
1	46144	46375	RLOC_00000011	.	-	386.72	-0.0111	0.4412	0.6712	0.0004741
1	45558	45645	RLOC_00000011	.	-	432.43	-0.2990	0.004074	0.04214	0.0004741
1	45953	46043	RLOC_00000011	.	-	478.05	-0.2994	0.003054	0.03544	0.0004741
1	50962	51122	RLOC_00000012	.	-	1.53	-1.1526	1	nan	0.002958
1	50446	50495	RLOC_00000012	.	-	3.19	-0.0736	0.9356	0.9716	0.002958
1	50336	50418	RLOC_00000012	.	-	3057.77	-0.3213	6.352e-05	0.002824	0.002958
1	50962	51063	RLOC_00000012	.	-	21.11	0.1606	0.8289	0.9198	0.002958
1	50630	50882	RLOC_00000012	.	-	4129.41	0.0140	0.1414	0.3553	0.002958
1	50962	51125	RLOC_00000012	.	-	2854.56	0.1244	3.441e-05	0.001858	0.002958
1	53182	53483	RLOC_00000013	.	+	22.25	-0.4432	0.09597	0.2832	0.6086
1	52729	52937	RLOC_00000013	.	+	16.52	0.5112	0.1435	0.3582	0.6086
1	53623	53702	RLOC_00000013	.	+	25.29	-0.2444	0.4367	0.6673	0.6086
1	52345	52433	RLOC_00000013	.	+	11.86	0.6086	0.07517	0.2453	0.6086
1	48823	61923	RLOC_00000014	.	-	0.10	-10.8478	0.8343	nan	nan
1	49432	64353	RLOC_00000014	.	-	0.07	-10.4617	0.8288	nan	nan
1	64474	64581	RLOC_00000014	.	-	0.14	-11.4216	0.8574	nan	nan
1	52297	64353	RLOC_00000014	.	-	0.07	-10.4617	0.8288	nan	nan
1	57522	57609	RLOC_00000014	.	-	0.55	-13.3840	0.9106	nan	nan
1	57938	69512	RLOC_00000014	.	-	0.06	-10.2498	0.8483	nan	nan
1	57907	74375	RLOC_00000014	.	-	0.23	-12.1406	0.9211	nan	nan
1	47981	48074	RLOC_00000014	.	-	0.53	0.4174	0.7219	nan	nan
1	48114	67556	RLOC_00000014	.	-	0.39	-12.8423	0.8913	nan	nan
1	58704	58813	RLOC_00000014	.	-	0.33	2.5335	0.5618	nan	nan
1	57928	58803	RLOC_00000014	.	-	0.13	14.8630	0.6598	nan	nan
1	48115	58552	RLOC_00000014	.	-	0.07	14.0647	0.6869	nan	nan
1	48115	67555	RLOC_00000014	.	-	0.07	14.0647	0.6869	nan	nan
1	65651	65732	RLOC_00000015	.	-	6.32	-0.4284	0.5772	0.7719	0.07826
1	66748	66834	RLOC_00000015	.	-	443.38	0.1610	0.05978	0.2149	0.07826
1	62860	63364	RLOC_00000015	.	-	0.91	-2.4835	0.5178	nan	0.07826
1	64474	64569	RLOC_00000015	.	-	0.00	nan	nan	nan	0.07826
1	66556	66677	RLOC_00000015	.	-	457.13	0.1527	0.1316	0.3405	0.07826
1	64806	64900	RLOC_00000015	.	-	400.21	-0.1661	0.5095	0.7237	0.07826
1	61948	62049	RLOC_00000015	.	-	1.53	-0.7541	0.9417	nan	0.07826
1	65216	65330	RLOC_00000015	.	-	499.44	-0.2945	0.00486	0.047	0.07826
1	62123	63556	RLOC_00000015	.	-	0.00	nan	nan	nan	0.07826
1	65651	65738	RLOC_00000015	.	-	450.02	0.1575	0.1145	0.3133	0.07826
1	65016	65109	RLOC_00000015	.	-	600.49	-0.2333	0.06849	0.2328	0.07826
1	65455	65562	RLOC_00000015	.	-	441.87	0.1627	0.1173	0.3181	0.07826
1	64474	64581	RLOC_00000015	.	-	449.27	-0.3052	0.2225	0.4605	0.07826
1	66159	66261	RLOC_00000015	.	-	371.42	0.0106	0.7624	0.8846	0.07826
1	64655	64750	RLOC_00000015	.	-	410.73	-0.3609	0.07188	0.2391	0.07826
1	66341	66449	RLOC_00000015	.	-	487.20	0.0282	0.5827	0.7755	0.07826
1	66896	67323	RLOC_00000015	.	-	342.04	0.2240	0.003176	0.0363	0.07826
1	65863	66106	RLOC_00000015	.	-	359.62	0.1409	0.2259	0.4645	0.07826
1	70967	71040	RLOC_00000016	.	-	1.92	nan	nan	nan	nan
1	70284	70839	RLOC_00000016	.	-	0.00	nan	nan	nan	nan
1	71720	71941	RLOC_00000016	.	-	0.00	nan	nan	nan	nan
1	70232	70895	RLOC_00000016	.	-	0.00	nan	nan	nan	nan
1	73015	73086	RLOC_00000017	.	+	0.00	nan	nan	nan	0.9324
1	72668	72914	RLOC_00000017	.	+	0.00	nan	nan	nan	0.9324
1	72668	73086	RLOC_00000017	.	+	337.11	0.1640	0.2606	0.5033	0.9324
1	73394	73487	RLOC_00000017	.	+	289.01	0.0999	0.2483	0.4895	0.9324
1	73739	73821	RLOC_00000017	.	+	383.82	-0.2725	0.3235	0.5675	0.9324
1	73162	73286	RLOC_00000017	.	+	301.29	-0.0801	0.5438	0.7488	0.9324
1	72668	73086	RLOC_00000018	.	-	3.72	1.5603	0.9115	0.9605	1
1	57907	74375	RLOC_00000018	.	-	0.23	-7.5688	0.9116	nan	1
1	74454	74660	RLOC_00000019	.	-	904.95	0.1625	0.001234	0.01998	0.03342
1	74448	74660	RLOC_00000019	.	-	31.83	0.1186	0.7339	0.8685	0.03342
1	74249	74337	RLOC_00000019	.	-	1755.46	-0.1494	0.0009948	0.01737	0.03342
1	74249	74337	RLOC_00000020	.	+	0.94	1.4421	0.7155	nan	nan
1	74454	74660	RLOC_00000020	.	+	0.06	-2.4487	0.665	nan	nan
1	74518	74674	RLOC_00000020	.	+	0.12	-1.4813	0.6968	nan	nan
1	76587	76815	RLOC_00000021	.	+	0.48	nan	nan	nan	nan
1	78088	79096	RLOC_00000022	.	+	2.90	nan	nan	nan	nan
1	83670	83883	RLOC_00000023	.	-	10.70	nan	nan	nan	nan
1	87161	87879	RLOC_00000024	.	-	3.29	nan	nan	nan	nan
1	89262	89404	RLOC_00000025	.	+	201.72	-0.0594	0.3901	0.6281	0.7581
1	89578	90161	RLOC_00000025	.	+	12.54	-0.8997	0.1689	0.3934	0.7581
1	89080	89172	RLOC_00000025	.	+	224.86	0.0819	0.1246	0.3299	0.7581
1	88729	88953	RLOC_00000025	.	+	0.00	nan	nan	nan	0.7581
1	94280	94356	RLOC_00000027	.	+	80.81	-0.0867	0.9857	0.9962	0.04756
1	95074	95159	RLOC_00000027	.	+	84.24	-0.7437	0.00367	0.03955	0.04756
1	91632	91742	RLOC_00000027	.	+	26.01	1.0561	0.001606	0.02368	0.04756
1	92088	92269	RLOC_00000027	.	+	2.77	1.9830	0.3323	0.5762	0.04756
1	92932	93044	RLOC_00000027	.	+	37.59	-0.2742	0.7826	0.8956	0.04756
1	93170	93270	RLOC_00000027	.	+	47.73	-0.1274	0.9173	0.963	0.04756
1	92069	92269	RLOC_00000027	.	+	20.62	0.3105	0.1586	0.3794	0.04756
1	92500	92568	RLOC_00000027	.	+	33.32	0.6867	0.0142	0.09047	0.04756
1	96156	96553	RLOC_00000029	.	+	31.59	0.3354	0.1852	0.415	0.8646
1	97804	98456	RLOC_00000029	.	+	405.21	-0.0647	0.7849	0.8967	0.8646
1	98604	98907	RLOC_00000029	.	+	425.48	-0.0202	0.969	0.9878	0.8646
1	100030	100592	RLOC_00000030	.	+	0.48	0.7461	0.5682	nan	0.9402
1	100030	100110	RLOC_00000030	.	+	3.06	-0.9624	0.3881	0.6263	0.9402
1	100030	100656	RLOC_00000030	.	+	207.27	0.0431	0.2577	0.4999	0.9402
1	100219	100656	RLOC_00000030	.	+	24.28	-0.1285	0.6664	0.8286	0.9402
1	109329	109405	RLOC_00000032	.	+	10.80	0.0755	0.7923	0.9006	1
1	109329	109412	RLOC_00000032	.	+	2.69	-0.1606	0.8204	0.9153	1
1	113194	113278	RLOC_00000034	.	+	0.00	nan	nan	nan	nan
1	114432	114618	RLOC_00000035	.	+	123.14	0.0822	0.4854	0.7058	1
1	115338	115481	RLOC_00000035	.	+	1.62	-1.2460	0.4914	nan	1
1	115338	115960	RLOC_00000035	.	+	147.77	-0.0560	0.5371	0.7438	1
1	117202	122768	RLOC_00000036	.	+	0.08	-7.5793	1	nan	1
1	117201	130683	RLOC_00000036	.	+	0.08	-7.5791	1	nan	1
1	117202	136244	RLOC_00000036	.	+	0.08	-7.5791	1	nan	1
1	117877	117948	RLOC_00000036	.	+	10.27	1.6003	0.6884	0.8419	1
1	118214	118485	RLOC_00000036	.	+	1.82	-1.5180	0.8769	nan	1
1	116185	130452	RLOC_00000036	.	+	0.40	15.3655	0.7362	nan	1
1	117202	122768	RLOC_00000037	.	+	0.08	-10.2967	0.9232	nan	nan
1	117201	130683	RLOC_00000037	.	+	0.08	-10.2968	0.9232	nan	nan
1	117202	136244	RLOC_00000037	.	+	0.08	-10.2968	0.9232	nan	nan
1	116185	130452	RLOC_00000037	.	+	0.40	15.1405	0.804	nan	nan
1	129059	129852	RLOC_00000038	.	-	392.98	-0.1306	0.6707	0.831	0.01178
1	126588	126685	RLOC_00000038	.	-	270.26	0.0311	0.1813	0.4103	0.01178
1	125225	125328	RLOC_00000038	.	-	610.68	-0.0596	0.3109	0.5548	0.01178
1	124122	124210	RLOC_00000038	.	-	461.76	-0.0000	0.2153	0.4522	0.01178
1	127934	128027	RLOC_00000038	.	-	283.87	0.1811	0.01584	0.09667	0.01178
1	125021	125133	RLOC_00000038	.	-	489.12	0.1319	0.0178	0.1036	0.01178
1	125045	125133	RLOC_00000038	.	-	0.00	nan	nan	nan	0.01178
1	129913	130038	RLOC_00000038	.	-	347.89	-0.3948	0.1895	0.4208	0.01178
1	123668	123784	RLOC_00000038	.	-	689.96	-0.2092	0.3724	0.6126	0.01178
1	125997	126075	RLOC_00000038	.	-	368.26	0.1318	0.04344	0.178	0.01178
1	126839	126934	RLOC_00000038	.	-	329.74	0.2259	0.02791	0.1364	0.01178
1	123896	123991	RLOC_00000038	.	-	607.23	-0.2877	0.327	0.5708	0.01178
1	124631	124713	RLOC_00000038	.	-	355.79	0.0265	0.1974	0.4307	0.01178
1	123500	123578	RLOC_00000038	.	-	632.71	-0.1332	0.6079	0.7924	0.01178
1	124393	124498	RLOC_00000038	.	-	374.99	0.1650	0.01325	0.08681	0.01178
1	125654	125741	RLOC_00000038	.	-	351.37	0.0783	0.2597	0.5023	0.01178
1	128311	128478	RLOC_00000038	.	-	261.32	0.1944	0.01796	0.1041	0.01178
1	123494	123578	RLOC_00000038	.	-	3.60	-0.6997	0.3752	0.6149	0.01178
1	121405	121492	RLOC_00000038	.	-	1045.71	-1.1116	0.0009915	0.01733	0.01178
1	124817	124920	RLOC_00000038	.	-	480.88	0.1009	0.01818	0.105	0.01178
1	127572	127650	RLOC_00000038	.	-	230.79	0.1140	0.05111	0.1956	0.01178
1	128550	128967	RLOC_00000038	.	-	327.47	0.0664	0.1258	0.3317	0.01178
1	127452	127531	RLOC_00000038	.	-	268.33	0.1031	0.04453	0.1804	0.01178
1	125842	125935	RLOC_00000038	.	-	331.48	0.0796	0.1311	0.3397	0.01178
1	127781	127867	RLOC_00000038	.	-	205.24	0.5758	0.0002423	0.006875	0.01178
1	130148	130371	RLOC_00000038	.	-	207.56	0.5722	0.003294	0.03702	0.01178
1	117202	122768	RLOC_00000039	.	+	0.08	-10.2967	0.9232	nan	nan
1	117201	130683	RLOC_00000039	.	+	0.08	-10.2968	0.9232	nan	nan
1	117202	136244	RLOC_00000039	.	+	0.08	-10.2968	0.9232	nan	nan
1	116185	130452	RLOC_00000039	.	+	0.40	15.1405	0.804	nan	nan
1	117202	136244	RLOC_00000040	.	+	0.08	nan	nan	nan	nan
1	132743	132823	RLOC_00000041	.	-	4.11	1.3711	0.1512	0.3693	0.8151
1	135103	135187	RLOC_00000041	.	-	2.76	-0.8016	0.8257	0.9182	0.8151
1	133538	133640	RLOC_00000041	.	-	5.02	0.2321	0.4359	0.6668	0.8151
1	133217	133302	RLOC_00000041	.	-	3.20	0.1342	0.6209	0.8006	0.8151
1	134500	134581	RLOC_00000041	.	-	6.22	-0.1060	0.6463	0.8161	0.8151
1	134205	134288	RLOC_00000041	.	-	2.58	0.4886	0.4951	0.713	0.8151
1	135268	135707	RLOC_00000041	.	-	3.12	-1.5464	0.5644	0.763	0.8151
1	133751	133910	RLOC_00000041	.	-	9.77	-0.9120	0.3649	0.6057	0.8151
1	136815	136934	RLOC_00000042	.	+	96.83	0.7215	2.011e-05	0.001283	0.0005786
1	137757	137847	RLOC_00000042	.	+	183.85	-0.5193	3.629e-06	0.0003624	0.0005786
1	136233	136666	RLOC_00000042	.	+	34.56	0.1239	0.5334	0.741	0.0005786
1	138777	138862	RLOC_00000043	.	+	0.00	nan	nan	nan	1
1	138777	138874	RLOC_00000043	.	+	0.38	7.6871	0.5332	nan	1
1	138540	138596	RLOC_00000043	.	+	0.00	nan	nan	nan	1
1	139344	139487	RLOC_00000043	.	+	1.38	9.5056	1	nan	1
1	138913	138988	RLOC_00000043	.	+	0.00	nan	nan	nan	1
1	139113	139202	RLOC_00000043	.	+	2.30	-0.5815	0.726	0.864	1
1	142638	142710	RLOC_00000044	.	+	143.00	0.0449	0.6435	0.8144	1
1	142280	142423	RLOC_00000044	.	+	205.56	-0.0409	0.6341	0.8089	1
1	143675	143760	RLOC_00000045	.	+	2.77	-0.0476	0.956	0.9814	0.2933
1	143675	143763	RLOC_00000045	.	+	2.42	0.5442	0.7863	0.8974	0.2933
1	144558	144926	RLOC_00000045	.	+	33.36	0.5574	0.02152	0.1164	0.2933
1	143823	143933	RLOC_00000045	.	+	23.52	0.0693	0.6614	0.8257	0.2933
1	145434	146163	RLOC_00000045	.	+	1.95	5.5245	0.002487	nan	0.2933
1	144350	144446	RLOC_00000045	.	+	37.10	0.1812	0.3373	0.5807	0.2933
1	145206	145344	RLOC_00000045	.	+	50.08	-0.3025	0.8212	0.9159	0.2933
1	145003	145131	RLOC_00000045	.	+	46.85	-0.6906	0.06053	0.2166	0.2933
1	143976	144063	RLOC_00000045	.	+	22.34	-0.1167	0.8071	0.9084	0.2933
1	144226	144314	RLOC_00000045	.	+	28.06	-0.1929	0.7366	0.8702	0.2933
1	144108	144192	RLOC_00000045	.	+	22.85	-0.0952	0.8287	0.9197	0.2933
1	147527	147643	RLOC_00000046	.	+	0.19	-9.0220	1	nan	1
1	147538	147643	RLOC_00000046	.	+	27.64	0.0196	0.9847	0.9956	1
1	147332	147451	RLOC_00000046	.	+	25.61	-0.0027	0.9505	0.9787	1
1	148598	154711	RLOC_00000047	.	-	0.07	-16.2775	0.8167	nan	nan
1	149484	157728	RLOC_00000047	.	-	0.21	5.1424	0.9164	nan	nan
1	157755	157828	RLOC_00000047	.	-	0.21	5.1424	0.9164	nan	nan
1	151297	151392	RLOC_00000048	.	-	0.00	nan	nan	nan	nan
1	152001	152085	RLOC_00000048	.	-	0.00	nan	nan	nan	nan
1	151730	151931	RLOC_00000048	.	-	0.00	nan	nan	nan	nan
1	145899	159755	RLOC_00000049	.	+	0.02	nan	nan	nan	nan
1	148598	154711	RLOC_00000050	.	-	0.07	-16.2775	0.8167	nan	nan
1	149484	157728	RLOC_00000050	.	-	0.21	5.1424	0.9164	nan	nan
1	157755	157828	RLOC_00000050	.	-	0.21	5.1424	0.9164	nan	nan
1	157755	157828	RLOC_00000051	.	-	525.52	-0.1667	0.02028	0.1121	0.2662
1	158111	158253	RLOC_00000051	.	-	715.14	0.1566	0.01844	0.1059	0.2662
1	159991	160078	RLOC_00000052	.	-	125.56	-0.4424	0.01224	0.08263	0.202
1	160301	160417	RLOC_00000052	.	-	132.34	0.0393	0.6934	0.8451	0.202
1	162279	162486	RLOC_00000052	.	-	56.88	0.5679	0.03204	0.1481	0.202
1	160477	160567	RLOC_00000052	.	-	144.99	0.1006	0.4731	0.6965	0.202
1	165655	165982	RLOC_00000053	.	+	21.88	-0.4874	0.1906	0.4224	0.05741
1	165655	165768	RLOC_00000053	.	+	34.57	-0.3830	0.2469	0.4881	0.05741
1	164102	164224	RLOC_00000053	.	+	31.33	1.1039	0.00208	0.02781	0.05741
1	164134	164224	RLOC_00000053	.	+	11.53	0.0711	0.9927	0.9996	0.05741
1	165379	165448	RLOC_00000053	.	+	55.32	0.2405	0.2523	0.4941	0.05741
1	163515	163933	RLOC_00000053	.	+	59.13	0.1433	0.454	0.6816	0.05741
1	164685	164770	RLOC_00000053	.	+	67.51	-0.2742	0.2402	0.481	0.05741
1	157722	170153	RLOC_00000054	.	-	0.08	-8.6198	0.8349	nan	nan
1	164685	164770	RLOC_00000054	.	-	0.27	-10.4096	0.8107	nan	nan
1	157216	172813	RLOC_00000054	.	-	0.08	12.0954	0.8349	nan	nan
1	165379	165448	RLOC_00000054	.	-	0.10	12.5760	0.8108	nan	nan
1	166870	167013	RLOC_00000055	.	-	1.16	nan	nan	nan	nan
1	169508	169599	RLOC_00000056	.	+	0.00	nan	nan	nan	nan
1	170759	170850	RLOC_00000056	.	+	0.00	nan	nan	nan	nan
1	168800	169036	RLOC_00000056	.	+	0.00	nan	nan	nan	nan
1	170161	170265	RLOC_00000056	.	+	0.00	nan	nan	nan	nan
1	169256	169346	RLOC_00000056	.	+	0.00	nan	nan	nan	nan
1	169992	170070	RLOC_00000056	.	+	0.00	nan	nan	nan	nan
1	169709	169805	RLOC_00000056	.	+	0.15	nan	nan	nan	nan
1	170506	170621	RLOC_00000056	.	+	0.00	nan	nan	nan	nan
1	170312	170411	RLOC_00000056	.	+	0.00	nan	nan	nan	nan
1	172543	172620	RLOC_00000057	.	-	1313.24	nan	nan	nan	nan
1	172520	172610	RLOC_00000058	.	+	0.36	nan	nan	nan	nan
1	176337	176591	RLOC_00000059	.	+	1.83	-1.6914	0.1651	nan	1
1	176031	176206	RLOC_00000059	.	+	0.87	12.8608	0.4616	nan	1
1	176751	177024	RLOC_00000059	.	+	2.92	0.5005	0.705	0.8517	1
1	182134	182252	RLOC_00000060	.	-	68.78	-0.0516	0.938	0.9726	0.01436
1	180851	181346	RLOC_00000060	.	-	1185.83	-0.1736	0.0003218	0.008245	0.01436
1	181421	181593	RLOC_00000060	.	-	1.76	-0.4751	0.445	nan	0.01436
1	181421	182060	RLOC_00000060	.	-	686.66	0.2273	0.0005285	0.01141	0.01436
1	186008	186339	RLOC_00000061	.	+	219.89	nan	nan	nan	nan
1	187821	188010	RLOC_00000062	.	+	164.10	0.8684	0.002119	0.02814	0.0004941
1	189674	189764	RLOC_00000062	.	+	268.25	0.0778	0.7971	0.9031	0.0004941
1	191474	191578	RLOC_00000062	.	+	68.88	-0.5182	0.05301	0.2	0.0004941
1	191888	191966	RLOC_00000062	.	+	113.66	-1.4367	0.001966	0.02682	0.0004941
1	189463	189561	RLOC_00000062	.	+	198.09	0.2996	0.1009	0.2917	0.0004941
1	188175	188283	RLOC_00000062	.	+	104.92	1.3387	2.965e-06	0.0003106	0.0004941
1	189319	189416	RLOC_00000062	.	+	200.04	0.4956	0.02138	0.1159	0.0004941
1	188413	188528	RLOC_00000062	.	+	110.87	0.6876	0.01434	0.09107	0.0004941
1	192025	192106	RLOC_00000062	.	+	116.49	-1.3561	0.003013	0.03514	0.0004941
1	190997	191137	RLOC_00000062	.	+	81.77	-0.6174	0.0121	0.08204	0.0004941
1	190827	190940	RLOC_00000062	.	+	78.41	-1.3310	7.404e-06	0.000613	0.0004941
1	191257	191340	RLOC_00000062	.	+	67.08	-0.4865	0.02989	0.1421	0.0004941
1	191691	191779	RLOC_00000062	.	+	58.47	-0.9479	0.05659	0.2082	0.0004941
1	193070	193350	RLOC_00000063	.	-	0.00	nan	nan	nan	nan
1	197421	197500	RLOC_00000064	.	+	325.53	0.1987	0.01491	0.09328	0.231
1	197670	197774	RLOC_00000064	.	+	436.04	0.0595	0.4421	0.6717	0.231
1	196541	197114	RLOC_00000064	.	+	411.63	0.1537	0.1033	0.2955	0.231
1	198182	198266	RLOC_00000064	.	+	485.63	-0.1951	0.0198	0.1103	0.231
1	197903	197973	RLOC_00000064	.	+	359.22	-0.2045	0.02198	0.1178	0.231
1	197218	197299	RLOC_00000064	.	+	448.32	0.0112	0.9073	0.9586	0.231
1	199958	200510	RLOC_00000065	.	+	1120.36	0.0084	0.7454	0.8753	1
1	199762	199889	RLOC_00000065	.	+	697.23	-0.0093	0.7488	0.8772	1
1	203942	204028	RLOC_00000066	.	+	1.92	-0.5971	0.3449	nan	1
1	202910	202990	RLOC_00000066	.	+	1.23	1.0125	0.9456	nan	1
1	203127	203266	RLOC_00000066	.	+	1.82	0.1247	1	nan	1
1	202507	202781	RLOC_00000066	.	+	0.64	-3.4555	0.2166	nan	1
1	203598	203759	RLOC_00000066	.	+	1.97	1.4120	0.4117	0.647	1
1	207242	207324	RLOC_00000067	.	+	13.37	0.0554	0.4201	0.6538	1
1	205948	206691	RLOC_00000067	.	+	11.92	-0.0585	0.425	0.6577	1
1	209607	209763	RLOC_00000068	.	+	11.48	0.2663	0.09599	0.2832	0.2058
1	212572	212670	RLOC_00000068	.	+	19.99	-0.4272	0.8438	0.9277	0.2058
1	211378	211473	RLOC_00000068	.	+	18.09	0.0189	0.9493	0.978	0.2058
1	211716	211854	RLOC_00000068	.	+	8.48	-0.3912	0.5555	0.7569	0.2058
1	210143	210384	RLOC_00000068	.	+	12.53	-0.1907	0.8946	0.9527	0.2058
1	210618	211051	RLOC_00000068	.	+	8.22	1.1136	0.01257	0.08409	0.2058
1	209865	209949	RLOC_00000068	.	+	9.45	-0.0298	0.6081	0.7926	0.2058
1	215553	215632	RLOC_00000069	.	+	0.24	-0.9183	0.8185	nan	0.9278
1	214896	215316	RLOC_00000069	.	+	0.12	8.6474	0.9107	nan	0.9278
1	214581	214696	RLOC_00000069	.	+	0.00	nan	nan	nan	0.9278
1	217089	217164	RLOC_00000069	.	+	2.01	2.0251	0.2427	0.4837	0.9278
1	215959	216043	RLOC_00000069	.	+	0.80	-1.0504	1	nan	0.9278
1	214405	214479	RLOC_00000069	.	+	0.00	nan	nan	nan	0.9278
1	216292	216413	RLOC_00000069	.	+	0.90	-2.9541	0.3633	nan	0.9278
1	219620	219751	RLOC_00000070	.	+	18.24	nan	nan	nan	nan
1	223095	223550	RLOC_00000071	.	-	328.50	0.4408	0.0006797	0.01352	0.0008176
1	222358	222621	RLOC_00000071	.	-	474.54	-0.4528	5.896e-06	0.0005213	0.0008176
1	223865	223944	RLOC_00000071	.	-	374.90	0.0929	0.1182	0.3196	0.0008176
1	226080	226170	RLOC_00000072	.	-	5127.78	0.1569	0.2642	0.5069	0.12
1	226310	226395	RLOC_00000072	.	-	6918.07	-0.0781	0.005829	0.05271	0.12
1	227048	227078	RLOC_00000072	.	-	3.52	1.2186	0.2328	0.4725	0.12
1	226690	226848	RLOC_00000072	.	-	5368.62	0.0748	0.7062	0.8524	0.12
1	229723	229828	RLOC_00000073	.	+	477.60	-0.0989	0.3333	0.577	0.9825
1	229933	230348	RLOC_00000073	.	+	555.17	0.0358	0.5892	0.7799	0.9825
1	230680	231170	RLOC_00000073	.	+	0.19	10.6732	0.5882	nan	0.9825
1	230458	230558	RLOC_00000073	.	+	451.57	0.0107	0.9219	0.9653	0.9825
1	229342	229428	RLOC_00000073	.	+	442.46	0.0491	0.7354	0.8695	0.9825
1	231907	232397	RLOC_00000074	.	-	0.43	10.4370	0.5266	nan	1
1	231927	232397	RLOC_00000074	.	-	25.75	-0.0683	0.9866	0.9967	1
1	231654	231783	RLOC_00000074	.	-	35.39	0.0204	0.898	0.9543	1
1	236547	236672	RLOC_00000075	.	-	58.27	0.9702	0.003964	0.0414	0.00496
1	237302	237503	RLOC_00000075	.	-	0.00	nan	nan	nan	0.00496
1	236295	236428	RLOC_00000075	.	-	86.60	0.6108	0.0003416	0.008553	0.00496
1	233296	233386	RLOC_00000075	.	-	180.73	-0.1483	0.2984	0.5422	0.00496
1	234620	234934	RLOC_00000075	.	-	158.35	0.0401	0.9385	0.9728	0.00496
1	233469	233547	RLOC_00000075	.	-	168.72	-0.3751	0.0008129	0.01521	0.00496
1	236026	236144	RLOC_00000075	.	-	83.20	0.1509	0.51	0.7241	0.00496
1	236783	236864	RLOC_00000075	.	-	72.88	0.5789	0.05256	0.1989	0.00496
1	235359	235717	RLOC_00000075	.	-	114.46	0.1390	0.4721	0.6956	0.00496
1	233617	234249	RLOC_00000075	.	-	219.33	-0.4561	7.073e-05	0.003033	0.00496
1	234987	235197	RLOC_00000075	.	-	157.92	0.1474	0.4226	0.6558	0.00496
1	237022	237219	RLOC_00000075	.	-	0.32	11.0043	0.3232	nan	0.00496
1	234391	234528	RLOC_00000075	.	-	176.80	0.1133	0.5271	0.7364	0.00496
1	237022	237503	RLOC_00000075	.	-	110.37	0.0539	0.7367	0.8702	0.00496
1	235751	235844	RLOC_00000075	.	-	125.56	0.0322	0.8258	0.9182	0.00496
1	241442	241538	RLOC_00000076	.	-	0.39	12.8972	0.7877	nan	0.4268
1	240891	240964	RLOC_00000076	.	-	4.07	-1.7472	0.03926	0.1675	0.4268
1	241718	241804	RLOC_00000076	.	-	1.00	0.3314	0.9787	nan	0.4268
1	244634	244769	RLOC_00000076	.	-	3.25	1.1411	0.2727	0.5158	0.4268
1	243127	243335	RLOC_00000076	.	-	9.62	0.2177	0.691	0.8437	0.4268
1	245263	245876	RLOC_00000076	.	-	6.59	0.0818	0.3079	0.5517	0.4268
1	240883	240959	RLOC_00000076	.	-	0.00	nan	nan	nan	0.4268
1	245263	245629	RLOC_00000076	.	-	0.00	nan	nan	nan	0.4268
1	241225	241305	RLOC_00000076	.	-	2.18	15.5355	0.09615	0.2835	0.4268
1	240671	240743	RLOC_00000076	.	-	3.86	-1.4304	0.5442	0.7491	0.4268
1	241908	241982	RLOC_00000076	.	-	1.93	-3.7276	0.319	nan	0.4268
1	242112	242213	RLOC_00000076	.	-	0.14	11.6227	1	nan	0.4268
1	242289	242448	RLOC_00000076	.	-	0.26	12.5495	0.7804	nan	0.4268
1	244872	245150	RLOC_00000076	.	-	3.51	0.6917	0.6434	0.8144	0.4268
1	243745	244034	RLOC_00000076	.	-	7.33	-0.4397	0.9723	0.9894	0.4268
1	240241	240351	RLOC_00000076	.	-	2.98	-1.1895	0.1781	0.4059	0.4268
1	244360	244504	RLOC_00000076	.	-	5.58	1.7478	0.08153	0.2573	0.4268
1	244181	244256	RLOC_00000076	.	-	1.90	1.5659	0.2474	nan	0.4268
1	246852	246948	RLOC_00000077	.	-	0.94	0.9607	1	nan	1
1	246607	246730	RLOC_00000077	.	-	2.18	-2.0856	0.4109	0.6463	1
1	247077	247166	RLOC_00000077	.	-	0.49	0.2465	0.5523	nan	1
1	247491	247576	RLOC_00000077	.	-	0.18	7.6020	0.802	nan	1
1	247679	248190	RLOC_00000077	.	-	1.93	1.2803	0.886	nan	1
1	247267	247361	RLOC_00000077	.	-	0.88	0.1238	0.8218	nan	1
1	251593	251679	RLOC_00000078	.	+	25.27	-0.2389	0.4451	0.6743	0.06634
1	250862	251003	RLOC_00000078	.	+	20.00	-0.5448	0.197	0.4303	0.06634
1	250587	250668	RLOC_00000078	.	+	17.13	0.2968	0.4399	0.6699	0.06634
1	251065	251142	RLOC_00000078	.	+	26.04	-0.5583	0.1567	0.3769	0.06634
1	251826	251921	RLOC_00000078	.	+	26.26	-0.2695	0.6277	0.8047	0.06634
1	249305	249539	RLOC_00000078	.	+	6.82	0.7504	0.4466	0.6755	0.06634
1	250150	250535	RLOC_00000078	.	+	24.06	0.1182	0.5904	0.7806	0.06634
1	251183	251259	RLOC_00000078	.	+	31.59	-0.2564	0.3874	0.6256	0.06634
1	249692	249773	RLOC_00000078	.	+	10.64	0.3275	0.3988	0.6357	0.06634
1	251315	251398	RLOC_00000078	.	+	24.93	0.1110	0.4997	0.7163	0.06634
1	252005	252120	RLOC_00000078	.	+	27.82	-0.4650	0.1723	0.398	0.06634
1	253456	253530	RLOC_00000078	.	+	1.80	13.7019	0.01003	nan	0.06634
1	249929	250016	RLOC_00000078	.	+	6.12	0.8442	0.2962	0.5398	0.06634
1	249929	250013	RLOC_00000078	.	+	5.45	0.9568	0.1361	0.3472	0.06634
1	249305	249542	RLOC_00000078	.	+	5.30	0.9547	0.1695	0.3942	0.06634
1	253873	253953	RLOC_00000078	.	+	3.60	4.5219	0.002539	0.0315	0.06634
1	251439	251538	RLOC_00000078	.	+	22.99	0.1507	0.508	0.7222	0.06634
1	253678	253774	RLOC_00000078	.	+	4.51	3.1730	0.006162	0.05458	0.06634
1	255365	257224	RLOC_00000079	.	+	0.59	-13.7530	0.6116	nan	nan
1	255073	255229	RLOC_00000079	.	+	0.14	12.2895	0.8057	nan	nan
1	255073	255154	RLOC_00000079	.	+	0.07	11.3039	0.8513	nan	nan
1	254406	269402	RLOC_00000079	.	+	0.02	10.1961	0.7885	nan	nan
1	259093	262872	RLOC_00000081	.	+	10.80	4.0998	7.726e-12	4.151e-09	8.387e-09
1	264159	264279	RLOC_00000081	.	+	174.59	0.1422	0.2013	0.4357	8.387e-09
1	266723	267292	RLOC_00000081	.	+	0.00	nan	nan	nan	8.387e-09
1	263298	263368	RLOC_00000081	.	+	157.20	0.3548	0.003613	0.03916	8.387e-09
1	263138	263231	RLOC_00000081	.	+	130.97	0.3035	0.02585	0.1303	8.387e-09
1	263571	263644	RLOC_00000081	.	+	170.64	0.3349	0.0237	0.1234	8.387e-09
1	263443	263525	RLOC_00000081	.	+	199.41	0.3152	0.003275	0.03689	8.387e-09
1	262964	263046	RLOC_00000081	.	+	147.34	0.5715	0.003169	0.03626	8.387e-09
1	263769	263856	RLOC_00000081	.	+	152.89	0.0597	0.4794	0.7014	8.387e-09
1	264581	264656	RLOC_00000081	.	+	185.88	0.0496	0.506	0.7207	8.387e-09
1	266040	266533	RLOC_00000081	.	+	4.80	0.9009	0.05009	0.1933	8.387e-09
1	265076	265335	RLOC_00000081	.	+	255.32	-0.0943	0.6302	0.8062	8.387e-09
1	266723	267281	RLOC_00000081	.	+	25.62	-0.7505	0.07179	0.2389	8.387e-09
1	265844	265951	RLOC_00000081	.	+	243.97	-0.3477	0.0957	0.2828	8.387e-09
1	264391	264519	RLOC_00000081	.	+	169.84	0.0428	0.5714	0.7678	8.387e-09
1	264711	264796	RLOC_00000081	.	+	179.88	-0.1456	0.4085	0.6441	8.387e-09
1	265436	265577	RLOC_00000081	.	+	310.49	-0.5884	0.000156	0.005141	8.387e-09
1	263933	264072	RLOC_00000081	.	+	172.98	0.1175	0.3645	0.6054	8.387e-09
1	267576	267676	RLOC_00000081	.	+	16.35	-0.3828	0.4733	0.6967	8.387e-09
1	265625	265776	RLOC_00000081	.	+	285.43	-0.5019	4.163e-05	0.002121	8.387e-09
1	264900	265020	RLOC_00000081	.	+	174.12	-0.2174	0.2225	0.4605	8.387e-09
1	265436	265520	RLOC_00000081	.	+	1.23	1.6981	0.4576	nan	8.387e-09
1	260581	260669	RLOC_00000082	.	-	4.88	0.9785	0.1596	0.3808	0.828
1	260033	260117	RLOC_00000082	.	-	8.04	-0.4100	0.5911	0.781	0.828
1	259613	259689	RLOC_00000082	.	-	4.01	-0.9870	0.3083	0.5521	0.828
1	260416	260507	RLOC_00000082	.	-	3.33	0.2221	0.4056	0.6414	0.828
1	260823	260920	RLOC_00000082	.	-	4.86	0.0266	0.5328	0.7406	0.828
1	261036	261128	RLOC_00000082	.	-	1.14	0.7777	0.5321	nan	0.828
1	260602	260669	RLOC_00000082	.	-	0.00	nan	nan	nan	0.828
1	268629	268716	RLOC_00000084	.	+	334.84	0.0684	0.3789	0.6184	0.9925
1	268993	269082	RLOC_00000084	.	+	619.40	-0.0582	0.3594	0.6008	0.9925
1	273148	273233	RLOC_00000085	.	-	27.14	-0.2347	0.818	0.9141	0.06713
1	272554	272650	RLOC_00000085	.	-	28.30	-0.2153	0.8885	0.9496	0.06713
1	273338	273428	RLOC_00000085	.	-	26.75	1.1042	0.002931	0.03452	0.06713
1	273561	273652	RLOC_00000085	.	-	33.95	0.5924	0.04487	0.1811	0.06713
1	274082	274166	RLOC_00000085	.	-	26.42	-0.1409	0.8799	0.9453	0.06713
1	274248	274383	RLOC_00000085	.	-	5.83	-1.7036	0.06807	0.232	0.06713
1	273787	273862	RLOC_00000085	.	-	32.42	0.2848	0.2568	0.4989	0.06713
1	272361	272444	RLOC_00000085	.	-	34.47	-0.2459	0.7721	0.8899	0.06713
1	272530	272650	RLOC_00000085	.	-	19.67	0.0857	0.5478	0.7515	0.06713
1	274082	274170	RLOC_00000085	.	-	8.56	1.1327	0.2168	0.454	0.06713
1	270089	270621	RLOC_00000085	.	-	363.81	-0.4193	0.002585	0.03184	0.06713
1	272982	273063	RLOC_00000085	.	-	32.26	0.3287	0.1282	0.3352	0.06713
1	274288	274383	RLOC_00000085	.	-	21.35	0.7650	0.03891	0.1667	0.06713
1	271288	271378	RLOC_00000086	.	+	181.65	0.0461	0.5324	0.7403	1
1	271432	271540	RLOC_00000086	.	+	203.41	-0.0441	0.5256	0.7353	1
1	275529	275631	RLOC_00000087	.	+	6.24	0.2992	0.4624	0.6883	1
1	275896	275972	RLOC_00000087	.	+	22.68	-0.1627	0.4056	0.6414	1
1	276518	276622	RLOC_00000088	.	-	9.03	0.5684	0.2605	0.5031	0.8258
1	277862	277946	RLOC_00000088	.	-	24.78	0.2307	0.3773	0.6169	0.8258
1	276518	276705	RLOC_00000088	.	-	10.37	0.1204	0.8726	0.9417	0.8258
1	276792	276869	RLOC_00000088	.	-	24.03	-0.0548	0.9936	1	0.8258
1	276988	277076	RLOC_00000088	.	-	22.99	-0.5190	0.7119	0.8558	0.8258
1	275976	276246	RLOC_00000088	.	-	16.30	0.3378	0.5241	0.7342	0.8258
1	277152	277231	RLOC_00000088	.	-	21.34	-0.3491	0.6144	0.7966	0.8258
1	277605	277716	RLOC_00000088	.	-	21.64	-0.4827	0.1581	0.3788	0.8258
1	277400	277492	RLOC_00000088	.	-	35.55	0.1571	0.6044	0.7901	0.8258
1	278251	278315	RLOC_00000088	.	-	28.22	0.2325	0.4934	0.7117	0.8258
1	276306	276404	RLOC_00000088	.	-	6.59	-0.2797	0.878	0.9445	0.8258
1	276432	286223	RLOC_00000089	.	+	0.08	-17.3630	0.7157	nan	nan
1	266241	285065	RLOC_00000089	.	+	0.08	5.7801	0.987	nan	nan
1	268974	276915	RLOC_00000089	.	+	0.08	5.7801	0.987	nan	nan
1	273014	285610	RLOC_00000089	.	+	0.02	4.5086	0.987	nan	nan
1	276296	285610	RLOC_00000089	.	+	0.02	4.5086	0.987	nan	nan
1	281347	281437	RLOC_00000090	.	+	192.19	0.1289	0.2685	0.5115	0.03906
1	280369	280448	RLOC_00000090	.	+	96.57	0.2018	0.2613	0.504	0.03906
1	280087	280179	RLOC_00000090	.	+	102.04	0.7260	0.001232	0.01995	0.03906
1	280736	280888	RLOC_00000090	.	+	80.51	-0.0941	0.6452	0.8154	0.03906
1	283532	283812	RLOC_00000090	.	+	178.83	-0.3926	0.01565	0.09605	0.03906
1	280567	280656	RLOC_00000090	.	+	77.64	0.0726	0.4792	0.7012	0.03906
1	278808	278886	RLOC_00000090	.	+	111.65	0.1067	0.3219	0.5659	0.03906
1	279087	279165	RLOC_00000090	.	+	74.95	0.4265	0.04277	0.1763	0.03906
1	279424	279535	RLOC_00000090	.	+	120.94	0.4785	0.02446	0.1257	0.03906
1	283052	283131	RLOC_00000090	.	+	231.02	-0.7756	0.001875	0.02605	0.03906
1	279239	279326	RLOC_00000090	.	+	95.91	0.5548	0.004361	0.04391	0.03906
1	283230	283313	RLOC_00000090	.	+	223.08	-0.4740	0.001719	0.0247	0.03906
1	283335	283443	RLOC_00000090	.	+	227.69	-0.3786	0.01911	0.1082	0.03906
1	280848	280962	RLOC_00000090	.	+	5.64	0.7484	0.09908	0.2886	0.03906
1	282765	282848	RLOC_00000090	.	+	94.83	-0.7364	0.02435	0.1254	0.03906
1	281120	281308	RLOC_00000090	.	+	193.53	0.1050	0.3232	0.5672	0.03906
1	282188	282483	RLOC_00000090	.	+	92.05	0.3116	0.06699	0.2298	0.03906
1	281535	281758	RLOC_00000090	.	+	126.04	0.4352	0.03779	0.1639	0.03906
1	279909	279973	RLOC_00000090	.	+	100.45	0.4222	0.08028	0.2549	0.03906
1	279575	279796	RLOC_00000090	.	+	112.87	0.3471	0.06141	0.2184	0.03906
1	286622	286716	RLOC_00000091	.	+	190.19	0.4714	0.008382	0.06603	0.004284
1	289775	290027	RLOC_00000091	.	+	476.19	-0.1828	0.09935	0.2891	0.004284
1	287132	287220	RLOC_00000091	.	+	200.09	0.4508	0.0025	0.03122	0.004284
1	286806	286996	RLOC_00000091	.	+	165.54	0.2038	0.1758	0.4027	0.004284
1	286806	286924	RLOC_00000091	.	+	21.04	1.6692	0.006582	0.05674	0.004284
1	287513	287641	RLOC_00000091	.	+	278.94	0.2320	0.03292	0.1505	0.004284
1	287709	287788	RLOC_00000091	.	+	237.55	0.3283	0.001793	0.02539	0.004284
1	288504	288592	RLOC_00000091	.	+	332.86	-0.0930	0.459	0.6855	0.004284
1	288175	288400	RLOC_00000091	.	+	389.12	0.1610	0.1674	0.3914	0.004284
1	290345	290438	RLOC_00000091	.	+	624.57	-0.4500	0.001886	0.02616	0.004284
1	289090	289236	RLOC_00000091	.	+	376.73	0.2099	0.1121	0.3095	0.004284
1	284634	284721	RLOC_00000091	.	+	201.32	1.1812	0.001157	0.01914	0.004284
1	290651	290746	RLOC_00000091	.	+	673.95	-0.5965	5.742e-05	0.002635	0.004284
1	286350	286451	RLOC_00000091	.	+	210.27	0.6087	0.01764	0.103	0.004284
1	289591	289717	RLOC_00000091	.	+	473.03	-0.0237	0.9807	0.9936	0.004284
1	287853	288086	RLOC_00000091	.	+	230.02	0.3603	0.08894	0.2706	0.004284
1	287279	287394	RLOC_00000091	.	+	312.27	0.2536	0.1193	0.3213	0.004284
1	288720	288881	RLOC_00000091	.	+	391.09	0.2114	0.1061	0.2997	0.004284
1	289385	289538	RLOC_00000091	.	+	400.82	0.1221	0.2415	0.4824	0.004284
1	290093	290169	RLOC_00000091	.	+	547.24	-0.3610	0.004591	0.04542	0.004284
1	290494	290577	RLOC_00000091	.	+	733.59	-0.4732	0.0001647	0.00534	0.004284
1	294119	294209	RLOC_00000093	.	+	730.66	0.0687	0.1872	0.4177	0.1444
1	293751	294054	RLOC_00000093	.	+	569.25	0.0058	0.9634	0.9851	0.1444
1	293408	293499	RLOC_00000093	.	+	213.78	0.2865	0.05436	0.2031	0.1444
1	294385	294510	RLOC_00000093	.	+	615.33	-0.1835	0.00749	0.06145	0.1444
1	293755	294054	RLOC_00000093	.	+	0.09	-0.8098	0.9376	nan	0.1444
1	285758	296786	RLOC_00000094	.	+	0.11	nan	nan	nan	nan
1	296247	296361	RLOC_00000095	.	-	965.24	-0.2795	0.04658	0.1851	0.2405
1	297024	297100	RLOC_00000095	.	-	409.62	0.0982	0.2732	0.5162	0.2405
1	296534	296625	RLOC_00000095	.	-	539.96	-0.0757	0.5752	0.7704	0.2405
1	296861	296950	RLOC_00000095	.	-	410.04	-0.0176	0.8555	0.9333	0.2405
1	297742	298012	RLOC_00000095	.	-	362.09	0.2239	0.08222	0.2586	0.2405
1	296699	296781	RLOC_00000095	.	-	509.40	-0.0851	0.6493	0.8179	0.2405
1	297174	297531	RLOC_00000095	.	-	431.06	0.2511	0.01584	0.09666	0.2405
1	300825	301487	RLOC_00000096	.	-	17.70	-0.0854	0.9162	0.9625	1
1	300514	300602	RLOC_00000096	.	-	44.10	0.0484	0.8701	0.9405	1
1	301543	302053	RLOC_00000096	.	-	16.38	-0.0557	0.7724	0.89	1
1	300664	300751	RLOC_00000096	.	-	32.84	0.0174	0.87	0.9405	1
1	297742	298012	RLOC_00000097	.	-	0.14	0.4727	0.9071	nan	nan
1	298031	310401	RLOC_00000097	.	-	0.14	0.4728	0.9071	nan	nan
1	301647	308776	RLOC_00000097	.	-	0.06	-0.6797	0.9039	nan	nan
1	301647	309582	RLOC_00000097	.	-	0.06	-0.6797	0.9039	nan	nan
1	305933	306044	RLOC_00000099	.	-	97.15	0.2171	0.3269	0.5706	0.7159
1	304806	304879	RLOC_00000099	.	-	110.57	-0.2506	0.1252	0.3307	0.7159
1	304962	305037	RLOC_00000099	.	-	105.31	-0.0517	0.9395	0.9732	0.7159
1	305089	305173	RLOC_00000099	.	-	103.56	0.0165	0.9131	0.9613	0.7159
1	305441	305546	RLOC_00000099	.	-	69.85	0.2236	0.6204	0.8002	0.7159
1	304503	304696	RLOC_00000099	.	-	143.62	-0.2926	0.1081	0.3029	0.7159
1	305701	305784	RLOC_00000099	.	-	55.63	0.3293	0.2711	0.514	0.7159
1	305257	305346	RLOC_00000099	.	-	95.95	0.2315	0.2616	0.5042	0.7159
1	304503	304696	RLOC_00000100	.	+	1.22	-2.6586	0.9035	nan	nan
1	304557	310953	RLOC_00000100	.	+	0.13	9.9820	0.9574	nan	nan
1	310980	311336	RLOC_00000100	.	+	0.13	9.9820	0.9574	nan	nan
1	304557	310953	RLOC_00000101	.	+	0.13	-0.0000	1	nan	nan
1	310980	311336	RLOC_00000101	.	+	0.13	0.0000	1	nan	nan
1	308069	308147	RLOC_00000102	.	-	13.71	0.1475	0.9141	0.9617	0.5181
1	308317	308396	RLOC_00000102	.	-	7.74	-0.3422	0.679	0.8359	0.5181
1	308572	308796	RLOC_00000102	.	-	8.77	0.8895	0.05496	0.2046	0.5181
1	309217	309427	RLOC_00000102	.	-	0.00	nan	nan	nan	0.5181
1	308317	308399	RLOC_00000102	.	-	0.07	8.1151	0.9066	nan	0.5181
1	309012	309111	RLOC_00000102	.	-	0.00	nan	nan	nan	0.5181
1	307358	307440	RLOC_00000102	.	-	11.16	-0.3494	0.9437	0.9751	0.5181
1	307804	307888	RLOC_00000102	.	-	16.05	-0.3197	0.7858	0.8971	0.5181
1	306799	306892	RLOC_00000102	.	-	16.88	-0.1233	0.9428	0.9747	0.5181
1	297742	298012	RLOC_00000103	.	-	0.14	0.2978	0.9239	nan	nan
1	298031	310401	RLOC_00000103	.	-	0.14	0.2978	0.9239	nan	nan
1	301647	309582	RLOC_00000103	.	-	0.06	-0.8547	0.9932	nan	nan
1	310980	311336	RLOC_00000104	.	+	26.23	nan	nan	nan	nan
1	310362	313677	RLOC_00000105	.	-	0.11	-7.4955	0.8973	nan	nan
1	313758	313879	RLOC_00000105	.	-	0.11	-7.4955	0.8973	nan	nan
1	312940	313566	RLOC_00000105	.	-	0.12	14.8379	0.8048	nan	nan
1	314224	314440	RLOC_00000106	.	-	311.17	-0.0634	0.5853	0.7773	0.7976
1	313417	313566	RLOC_00000106	.	-	11.44	-1.2511	0.1423	0.3566	0.7976
1	314801	315576	RLOC_00000106	.	-	1.05	12.6068	0.08339	nan	0.7976
1	315014	315576	RLOC_00000106	.	-	255.75	0.1619	0.3222	0.5662	0.7976
1	313751	313871	RLOC_00000106	.	-	0.00	nan	nan	nan	0.7976
1	313758	313879	RLOC_00000106	.	-	201.02	-0.0830	0.5785	0.7727	0.7976
1	313451	313566	RLOC_00000106	.	-	15.33	-0.2692	0.9894	0.9979	0.7976
1	314550	314651	RLOC_00000106	.	-	268.41	-0.0554	0.6147	0.7967	0.7976
1	313994	314086	RLOC_00000106	.	-	167.39	0.0760	0.5431	0.7483	0.7976
1	314801	314890	RLOC_00000106	.	-	320.56	0.0823	0.4881	0.7077	0.7976
1	314224	314440	RLOC_00000107	.	+	1.22	nan	nan	nan	nan
1	317192	317293	RLOC_00000108	.	+	91.69	0.2982	0.1069	0.3009	0.1594
1	317844	317978	RLOC_00000108	.	+	106.24	-0.2290	0.2931	0.5366	0.1594
1	317641	317764	RLOC_00000108	.	+	81.04	-0.0150	0.9305	0.9693	0.1594
1	316256	316343	RLOC_00000108	.	+	87.56	0.3251	0.1962	0.4293	0.1594
1	318812	318985	RLOC_00000108	.	+	103.23	-0.2229	0.2849	0.5283	0.1594
1	317438	317552	RLOC_00000108	.	+	83.54	0.1274	0.5132	0.7265	0.1594
1	316439	316538	RLOC_00000108	.	+	77.35	0.6055	0.008603	0.06701	0.1594
1	318200	318361	RLOC_00000108	.	+	95.54	-0.0772	0.737	0.8704	0.1594
1	316712	316791	RLOC_00000108	.	+	65.82	0.2081	0.2654	0.5083	0.1594
1	316896	317007	RLOC_00000108	.	+	62.33	0.0810	0.7437	0.8743	0.1594
1	318039	318144	RLOC_00000108	.	+	117.10	-0.2628	0.08865	0.27	0.1594
1	318432	318564	RLOC_00000108	.	+	79.73	0.1432	0.5156	0.7282	0.1594
1	319295	319371	RLOC_00000108	.	+	153.27	-0.2536	0.1843	0.4139	0.1594
1	317393	317552	RLOC_00000108	.	+	1.16	12.0245	0.0198	nan	0.1594
1	317455	317560	RLOC_00000108	.	+	0.00	nan	nan	nan	0.1594
1	319100	319203	RLOC_00000108	.	+	127.82	-0.3158	0.1301	0.3381	0.1594
1	317089	317166	RLOC_00000108	.	+	96.31	0.2459	0.1521	0.3706	0.1594
1	316439	316522	RLOC_00000108	.	+	2.89	0.1601	0.7944	0.9016	0.1594
1	318200	318295	RLOC_00000108	.	+	0.00	nan	nan	nan	0.1594
1	320456	320768	RLOC_00000109	.	-	97.56	0.0396	0.9064	0.9582	0.007748
1	321864	321957	RLOC_00000109	.	-	71.76	0.3111	0.3054	0.5492	0.007748
1	320295	320379	RLOC_00000109	.	-	109.74	-0.2681	0.01264	0.08441	0.007748
1	320144	320251	RLOC_00000109	.	-	123.29	-0.2437	0.03427	0.1541	0.007748
1	322405	322512	RLOC_00000109	.	-	79.99	0.8693	0.0001343	0.004646	0.007748
1	321421	321750	RLOC_00000109	.	-	71.90	-0.1296	0.8094	0.9096	0.007748
1	323839	324257	RLOC_00000110	.	+	107.33	0.3042	0.01549	0.09556	0.2373
1	324415	324635	RLOC_00000110	.	+	159.28	-0.3493	0.04584	0.1835	0.2373
1	323083	323207	RLOC_00000110	.	+	36.95	-0.3992	0.2057	0.4409	0.2373
1	323281	323678	RLOC_00000110	.	+	95.11	0.1532	0.2252	0.4638	0.2373
1	328321	328423	RLOC_00000111	.	+	46.73	0.0445	0.6746	0.8332	0.006569
1	329029	329118	RLOC_00000111	.	+	77.74	0.1332	0.3667	0.6075	0.006569
1	327385	327487	RLOC_00000111	.	+	46.99	1.0663	0.005603	0.05147	0.006569
1	329210	329310	RLOC_00000111	.	+	82.79	0.0564	0.7365	0.8701	0.006569
1	328733	328883	RLOC_00000111	.	+	0.00	nan	nan	nan	0.006569
1	328503	328897	RLOC_00000111	.	+	0.00	nan	nan	nan	0.006569
1	326227	326331	RLOC_00000111	.	+	38.79	0.6260	0.0214	0.116	0.006569
1	326814	326930	RLOC_00000111	.	+	32.32	0.5003	0.1142	0.3128	0.006569
1	330154	330242	RLOC_00000111	.	+	105.55	-0.6745	0.0001053	0.003968	0.006569
1	327865	327999	RLOC_00000111	.	+	70.66	0.0637	0.8634	0.9371	0.006569
1	325640	325912	RLOC_00000111	.	+	40.87	0.6200	0.04522	0.1819	0.006569
1	328554	328685	RLOC_00000111	.	+	0.00	nan	nan	nan	0.006569
1	326516	326593	RLOC_00000111	.	+	51.42	0.1754	0.394	0.6315	0.006569
1	329697	329780	RLOC_00000111	.	+	97.88	-0.4781	0.01116	0.07812	0.006569
1	327575	327662	RLOC_00000111	.	+	46.90	0.4439	0.05652	0.208	0.006569
1	327083	327236	RLOC_00000111	.	+	73.08	0.3968	0.04658	0.1851	0.006569
1	328554	328897	RLOC_00000111	.	+	86.71	0.3076	0.2224	0.4605	0.006569
1	329923	330026	RLOC_00000111	.	+	154.06	-0.5623	0.0004875	0.01086	0.006569
1	329435	329572	RLOC_00000111	.	+	91.76	-0.1040	0.5001	0.7166	0.006569
1	328106	328187	RLOC_00000111	.	+	79.93	-0.1407	0.6017	0.7883	0.006569
1	326012	326105	RLOC_00000111	.	+	40.93	0.3161	0.233	0.4727	0.006569
1	332182	332275	RLOC_00000112	.	-	196.67	-0.0275	0.96	0.9835	0.08671
1	336232	336416	RLOC_00000112	.	-	97.49	0.0768	0.255	0.497	0.08671
1	334177	334470	RLOC_00000112	.	-	89.12	0.0647	0.2786	0.5219	0.08671
1	333627	333904	RLOC_00000112	.	-	140.91	0.0790	0.3399	0.5831	0.08671
1	332632	332723	RLOC_00000112	.	-	170.30	0.1673	0.09935	0.2891	0.08671
1	333044	333128	RLOC_00000112	.	-	175.84	-0.4891	0.003693	0.03969	0.08671
1	335772	335915	RLOC_00000112	.	-	95.47	0.4298	0.01578	0.09646	0.08671
1	335320	335418	RLOC_00000112	.	-	92.31	0.3347	0.1842	0.4138	0.08671
1	331422	331533	RLOC_00000112	.	-	231.95	-0.3748	0.01926	0.1086	0.08671
1	334762	334898	RLOC_00000112	.	-	107.82	0.1843	0.2708	0.5138	0.08671
1	338986	339125	RLOC_00000113	.	+	126.87	nan	nan	nan	nan
1	333471	343400	RLOC_00000114	.	-	0.08	-4.5622	0.9195	nan	nan
1	330974	341314	RLOC_00000114	.	-	0.13	-5.1627	0.9195	nan	nan
1	335038	344785	RLOC_00000114	.	-	0.02	16.4809	0.7621	nan	nan
1	333471	343400	RLOC_00000115	.	-	0.08	-14.3071	0.5765	nan	nan
1	343239	343435	RLOC_00000115	.	-	0.97	-1.6681	0.7762	nan	nan
1	344105	344217	RLOC_00000115	.	-	1.08	9.0693	0.8397	nan	nan
1	335038	344785	RLOC_00000115	.	-	0.02	4.0506	0.7769	nan	nan
1	339740	346035	RLOC_00000116	.	+	0.10	nan	nan	nan	nan
1	348266	348372	RLOC_00000117	.	+	21.03	0.3732	0.2955	0.539	0.005742
1	351631	351728	RLOC_00000117	.	+	50.02	-0.2996	0.6173	0.7982	0.005742
1	349885	350048	RLOC_00000117	.	+	26.12	0.1579	0.546	0.7502	0.005742
1	348126	348211	RLOC_00000117	.	+	20.30	-0.0019	0.4634	0.6891	0.005742
1	352000	352125	RLOC_00000117	.	+	57.03	-0.6063	0.01017	0.0739	0.005742
1	348453	348561	RLOC_00000117	.	+	27.67	0.8057	0.04303	0.177	0.005742
1	348784	348879	RLOC_00000117	.	+	26.64	0.3147	0.2811	0.5242	0.005742
1	351818	351911	RLOC_00000117	.	+	57.66	-0.7352	0.003738	0.03997	0.005742
1	348975	349066	RLOC_00000117	.	+	28.02	0.3528	0.2091	0.445	0.005742
1	349365	349549	RLOC_00000117	.	+	22.20	1.0953	0.02173	0.117	0.005742
1	350782	350870	RLOC_00000117	.	+	50.39	-0.1665	0.6356	0.8099	0.005742
1	351328	351411	RLOC_00000117	.	+	75.49	-0.0856	0.5403	0.7462	0.005742
1	349098	349237	RLOC_00000117	.	+	27.11	0.5920	0.07872	0.2522	0.005742
1	348639	348734	RLOC_00000117	.	+	22.88	1.0670	0.01428	0.09081	0.005742
1	350146	350225	RLOC_00000117	.	+	38.65	0.8500	0.01771	0.1033	0.005742
1	349719	349802	RLOC_00000117	.	+	36.40	-0.3789	0.2393	0.48	0.005742
1	350295	350473	RLOC_00000117	.	+	47.81	-0.3375	0.2172	0.4544	0.005742
1	350965	351043	RLOC_00000117	.	+	68.48	-0.0296	0.9777	0.9921	0.005742
1	351159	351251	RLOC_00000117	.	+	62.69	0.3359	0.2345	0.4743	0.005742
1	351600	351736	RLOC_00000117	.	+	0.00	nan	nan	nan	0.005742
1	350569	350657	RLOC_00000117	.	+	52.57	-0.4065	0.1833	0.4128	0.005742
1	352317	352845	RLOC_00000117	.	+	3.20	5.3693	8.67e-05	0.003478	0.005742
1	353161	353237	RLOC_00000118	.	-	122.72	-0.2357	0.05025	0.1937	0.4917
1	353511	353621	RLOC_00000118	.	-	2.92	0.5072	0.4418	0.6715	0.4917
1	354120	354212	RLOC_00000118	.	-	16.37	0.6261	0.1206	0.3234	0.4917
1	360768	360891	RLOC_00000119	.	-	37.98	0.1042	0.5346	0.7419	1
1	360442	360722	RLOC_00000119	.	-	25.55	-0.2085	0.4274	0.6596	1
1	360148	360239	RLOC_00000119	.	-	55.22	0.0237	0.911	0.9603	1
1	360442	360852	RLOC_00000119	.	-	0.00	nan	nan	nan	1
1	366858	366985	RLOC_00000120	.	+	12.48	0.2094	0.4433	0.6729	1
1	366324	366722	RLOC_00000120	.	+	12.36	-0.2122	0.4435	0.6729	1
1	361304	368878	RLOC_00000121	.	-	0.13	nan	nan	nan	nan
1	370750	370858	RLOC_00000122	.	-	4.81	nan	nan	nan	nan
1	384839	384907	RLOC_00000124	.	+	318.75	-0.5222	4.129e-06	0.0004041	0.0006403
1	380002	380085	RLOC_00000124	.	+	14.56	0.2988	0.2004	0.4346	0.0006403
1	376814	376924	RLOC_00000124	.	+	63.28	0.7714	0.003888	0.04094	0.0006403
1	382928	383029	RLOC_00000124	.	+	176.84	0.0800	0.3121	0.5561	0.0006403
1	383687	384083	RLOC_00000124	.	+	155.59	-0.0158	0.6135	0.7961	0.0006403
1	374499	374582	RLOC_00000124	.	+	55.53	0.3887	0.07111	0.2377	0.0006403
1	378035	378118	RLOC_00000124	.	+	103.59	0.4315	0.008998	0.06887	0.0006403
1	385816	385908	RLOC_00000124	.	+	236.69	-0.6577	0.004295	0.04357	0.0006403
1	385323	385431	RLOC_00000124	.	+	186.70	-0.3178	0.1228	0.3269	0.0006403
1	373404	373605	RLOC_00000124	.	+	0.00	nan	nan	nan	0.0006403
1	380374	380601	RLOC_00000124	.	+	131.88	0.1740	0.04144	0.1729	0.0006403
1	380002	380088	RLOC_00000124	.	+	101.91	0.3997	0.004945	0.0476	0.0006403
1	378364	378503	RLOC_00000124	.	+	85.10	0.9344	0.0007486	0.01438	0.0006403
1	385622	385712	RLOC_00000124	.	+	248.02	-0.6264	0.001787	0.02534	0.0006403
1	380997	381149	RLOC_00000124	.	+	122.04	0.4923	0.005807	0.05257	0.0006403
1	384229	384317	RLOC_00000124	.	+	178.34	-0.2976	0.07585	0.2467	0.0006403
1	373785	373891	RLOC_00000124	.	+	70.45	0.1201	0.04807	0.1885	0.0006403
1	379229	379304	RLOC_00000124	.	+	126.51	0.6076	0.001109	0.01862	0.0006403
1	380173	380269	RLOC_00000124	.	+	106.23	0.3140	0.03619	0.1596	0.0006403
1	381633	381729	RLOC_00000124	.	+	179.93	-0.1716	0.5993	0.7869	0.0006403
1	383528	383607	RLOC_00000124	.	+	155.52	-0.0160	0.9795	0.993	0.0006403
1	381331	381404	RLOC_00000124	.	+	134.84	0.0757	0.2914	0.5349	0.0006403
1	374921	375124	RLOC_00000124	.	+	49.42	0.6282	0.03668	0.1609	0.0006403
1	374188	374271	RLOC_00000124	.	+	68.39	0.3552	0.03104	0.1453	0.0006403
1	379769	379865	RLOC_00000124	.	+	109.62	0.3511	0.07516	0.2453	0.0006403
1	386332	386427	RLOC_00000124	.	+	320.54	-0.8025	0.0003972	0.00948	0.0006403
1	386042	386132	RLOC_00000124	.	+	238.86	-1.0900	1.367e-05	0.0009655	0.0006403
1	374921	375121	RLOC_00000124	.	+	6.46	-0.2470	0.423	0.6561	0.0006403
1	381831	381911	RLOC_00000124	.	+	161.79	-0.1812	0.599	0.7867	0.0006403
1	375237	375324	RLOC_00000124	.	+	66.44	0.3957	0.07565	0.2463	0.0006403
1	378853	378942	RLOC_00000124	.	+	75.98	0.6240	1.501e-05	0.001037	0.0006403
1	377027	377210	RLOC_00000124	.	+	104.42	0.4714	0.04403	0.1793	0.0006403
1	380696	380845	RLOC_00000124	.	+	122.06	0.1521	0.04779	0.1879	0.0006403
1	382039	382126	RLOC_00000124	.	+	148.68	0.0449	0.215	0.4519	0.0006403
1	375718	375807	RLOC_00000124	.	+	76.93	0.4303	0.06358	0.2228	0.0006403
1	376473	376561	RLOC_00000124	.	+	49.66	0.6046	0.007812	0.06305	0.0006403
1	384968	385170	RLOC_00000124	.	+	262.63	-0.6689	0.0001981	0.006028	0.0006403
1	379088	379182	RLOC_00000124	.	+	121.66	0.4826	0.0001983	0.006029	0.0006403
1	379432	379527	RLOC_00000124	.	+	90.99	0.1312	0.3094	0.5532	0.0006403
1	375452	375527	RLOC_00000124	.	+	62.06	0.7800	0.001254	0.02017	0.0006403
1	377614	377880	RLOC_00000124	.	+	93.94	0.1837	0.08544	0.2643	0.0006403
1	378190	378297	RLOC_00000124	.	+	94.58	0.8709	0.0008307	0.01544	0.0006403
1	384448	384557	RLOC_00000124	.	+	122.38	-0.1681	0.494	0.7121	0.0006403
1	378648	378745	RLOC_00000124	.	+	76.14	0.5520	0.02553	0.1292	0.0006403
1	382566	382802	RLOC_00000124	.	+	110.89	0.0724	0.5573	0.7581	0.0006403
1	383129	383394	RLOC_00000124	.	+	146.52	0.2984	0.03873	0.1663	0.0006403
1	384604	384693	RLOC_00000124	.	+	158.60	-0.2550	0.2867	0.5302	0.0006403
1	377304	377390	RLOC_00000124	.	+	105.07	0.2066	0.09433	0.2803	0.0006403
1	382170	382372	RLOC_00000124	.	+	165.04	0.0935	0.2431	0.4841	0.0006403
1	376250	376351	RLOC_00000124	.	+	55.22	0.0988	0.2979	0.5417	0.0006403
1	376001	376113	RLOC_00000124	.	+	57.73	0.4236	0.03819	0.1648	0.0006403
1	388759	388850	RLOC_00000125	.	-	203.31	0.1682	0.2424	0.4835	0.7766
1	389300	389409	RLOC_00000125	.	-	221.57	0.1121	0.5006	0.717	0.7766
1	388405	388538	RLOC_00000125	.	-	356.32	-0.1696	0.1328	0.3422	0.7766
1	388939	389049	RLOC_00000125	.	-	264.20	-0.0820	0.7604	0.8835	0.7766
1	387502	387583	RLOC_00000125	.	-	416.03	-0.1895	0.218	0.4555	0.7766
1	389137	389225	RLOC_00000125	.	-	266.65	0.0879	0.4323	0.664	0.7766
1	387654	388267	RLOC_00000125	.	-	79.67	0.0535	0.4832	0.7041	0.7766
1	387671	388267	RLOC_00000125	.	-	270.04	-0.0054	0.8558	0.9335	0.7766
1	388608	388715	RLOC_00000125	.	-	243.82	0.1490	0.1992	0.433	0.7766
1	392299	392373	RLOC_00000126	.	+	273.05	-0.6165	3.063e-08	7.515e-06	1.349e-05
1	392169	392261	RLOC_00000126	.	+	14.23	-0.0515	0.9042	0.9571	1.349e-05
1	398525	398613	RLOC_00000126	.	+	224.00	0.4185	0.0001821	0.005709	1.349e-05
1	392494	392575	RLOC_00000126	.	+	320.84	-0.4781	0.001557	0.02321	1.349e-05
1	398345	398459	RLOC_00000126	.	+	269.07	0.4526	0.004783	0.04656	1.349e-05
1	396216	396290	RLOC_00000126	.	+	249.92	0.6906	7.804e-06	0.0006363	1.349e-05
1	395945	396028	RLOC_00000126	.	+	224.89	0.3034	0.04088	0.1715	1.349e-05
1	390563	390761	RLOC_00000126	.	+	239.07	-0.2227	0.1002	0.2905	1.349e-05
1	397097	397702	RLOC_00000126	.	+	211.45	0.4102	0.003829	0.04052	1.349e-05
1	390249	390351	RLOC_00000126	.	+	233.74	-0.1163	0.3946	0.6321	1.349e-05
1	398150	398291	RLOC_00000126	.	+	269.58	0.3663	0.005552	0.05121	1.349e-05
1	390249	390318	RLOC_00000126	.	+	6.45	-1.4664	0.1767	0.404	1.349e-05
1	399109	399181	RLOC_00000126	.	+	399.75	-0.0499	0.5859	0.7777	1.349e-05
1	393874	393965	RLOC_00000126	.	+	91.52	-0.1014	0.7033	0.8508	1.349e-05
1	394152	394227	RLOC_00000126	.	+	98.58	-0.3996	0.0666	0.229	1.349e-05
1	391715	392020	RLOC_00000126	.	+	251.70	-0.3985	0.03596	0.1589	1.349e-05
1	396724	396792	RLOC_00000126	.	+	397.13	0.2758	0.06749	0.2307	1.349e-05
1	391262	391457	RLOC_00000126	.	+	225.31	-0.3557	0.004666	0.04584	1.349e-05
1	390398	390482	RLOC_00000126	.	+	260.94	-0.2458	0.0892	0.2711	1.349e-05
1	397742	397876	RLOC_00000126	.	+	248.40	0.2286	0.05891	0.213	1.349e-05
1	398965	399067	RLOC_00000126	.	+	458.23	-0.1178	0.2541	0.4961	1.349e-05
1	392075	392261	RLOC_00000126	.	+	0.00	nan	nan	nan	1.349e-05
1	396862	396940	RLOC_00000126	.	+	275.62	0.2469	0.1058	0.2991	1.349e-05
1	390863	391002	RLOC_00000126	.	+	175.68	-0.5391	0.02304	0.1214	1.349e-05
1	396355	396438	RLOC_00000126	.	+	260.94	0.6902	1.906e-06	0.0002231	1.349e-05
1	392071	392261	RLOC_00000126	.	+	239.16	-0.7069	4.765e-06	0.000446	1.349e-05
1	396087	396166	RLOC_00000126	.	+	219.11	0.5303	0.003508	0.0385	1.349e-05
1	398712	398904	RLOC_00000126	.	+	363.31	-0.0494	0.6609	0.8255	1.349e-05
1	399392	399483	RLOC_00000126	.	+	483.10	-0.0483	0.6789	0.8358	1.349e-05
1	391540	391651	RLOC_00000126	.	+	227.70	-0.3345	0.0228	0.1207	1.349e-05
1	389942	390036	RLOC_00000126	.	+	177.56	-0.0211	0.8917	0.9512	1.349e-05
1	391122	391215	RLOC_00000126	.	+	213.06	-0.3275	0.01877	0.1069	1.349e-05
1	394450	394671	RLOC_00000126	.	+	146.84	-0.6177	0.002759	0.03315	1.349e-05
1	397963	398064	RLOC_00000126	.	+	305.34	0.3009	0.01697	0.1006	1.349e-05
1	398712	399010	RLOC_00000126	.	+	17.84	0.3912	0.1275	0.3341	1.349e-05
1	396533	396608	RLOC_00000126	.	+	297.31	0.3741	0.01165	0.08021	1.349e-05
1	401369	401460	RLOC_00000127	.	-	449.56	-0.0026	0.9928	0.9997	0.7114
1	400445	400724	RLOC_00000127	.	-	509.76	-0.1567	0.1584	0.3791	0.7114
1	401085	401163	RLOC_00000127	.	-	478.80	0.1540	0.1067	0.3006	0.7114
1	400827	400930	RLOC_00000127	.	-	587.47	-0.0276	0.7632	0.8851	0.7114
1	401507	401594	RLOC_00000127	.	-	440.67	-0.0059	0.9862	0.9965	0.7114
1	401234	401322	RLOC_00000127	.	-	408.65	0.0966	0.2288	0.4678	0.7114
1	401666	401774	RLOC_00000127	.	-	248.49	-0.0907	0.3226	0.5666	0.7114
1	395846	408878	RLOC_00000128	.	+	0.08	-7.7952	0.9132	nan	nan
1	399446	416958	RLOC_00000128	.	+	0.41	-10.1615	0.8932	nan	nan
1	397243	407472	RLOC_00000128	.	+	0.02	15.0076	0.8352	nan	nan
1	407549	407721	RLOC_00000128	.	+	0.02	15.0076	0.8352	nan	nan
1	399717	407434	RLOC_00000128	.	+	0.02	15.0076	0.8352	nan	nan
1	402807	402885	RLOC_00000129	.	-	0.00	nan	nan	nan	nan
1	403946	404185	RLOC_00000130	.	-	1503.86	0.1097	0.2166	0.4538	0.903
1	403525	403770	RLOC_00000130	.	-	1273.67	-0.1117	0.2187	0.4562	0.903
1	405109	405229	RLOC_00000131	.	+	83.00	0.5760	0.01611	0.09765	0.000641
1	404668	404756	RLOC_00000131	.	+	63.36	0.8879	0.007477	0.06143	0.000641
1	406988	407079	RLOC_00000131	.	+	82.27	0.5836	0.01528	0.09474	0.000641
1	412789	412882	RLOC_00000131	.	+	152.73	-0.9337	4.128e-06	0.0004041	0.000641
1	407820	408072	RLOC_00000131	.	+	205.78	-0.3436	0.1716	0.3971	0.000641
1	405315	405429	RLOC_00000131	.	+	63.53	0.8066	0.0001535	0.005085	0.000641
1	404952	405064	RLOC_00000131	.	+	92.25	0.5318	0.1112	0.3079	0.000641
1	411252	411335	RLOC_00000131	.	+	291.90	-0.0442	0.9546	0.9808	0.000641
1	407549	407721	RLOC_00000131	.	+	141.11	-0.1303	0.7338	0.8684	0.000641
1	405484	405647	RLOC_00000131	.	+	67.42	0.4980	0.02325	0.122	0.000641
1	408328	408407	RLOC_00000131	.	+	200.58	-0.4957	0.02699	0.1338	0.000641
1	406517	407534	RLOC_00000131	.	+	0.00	nan	nan	nan	0.000641
1	410892	411176	RLOC_00000131	.	+	496.76	0.0295	0.4061	0.6418	0.000641
1	406309	406414	RLOC_00000131	.	+	77.68	0.6963	8.68e-05	0.003479	0.000641
1	405764	405892	RLOC_00000131	.	+	97.74	-0.0815	0.8405	0.9259	0.000641
1	413294	413366	RLOC_00000131	.	+	293.78	-1.1267	5.38e-05	0.002519	0.000641
1	406791	406902	RLOC_00000131	.	+	117.78	0.3692	0.07997	0.2544	0.000641
1	404841	404911	RLOC_00000131	.	+	109.57	0.5346	0.06352	0.2227	0.000641
1	413002	413079	RLOC_00000131	.	+	255.08	-0.3073	0.09114	0.2746	0.000641
1	405109	405241	RLOC_00000131	.	+	0.07	8.6556	0.9429	nan	0.000641
1	408137	408235	RLOC_00000131	.	+	230.68	-0.3195	0.2441	0.4851	0.000641
1	409137	409218	RLOC_00000131	.	+	470.36	0.1485	0.2033	0.4382	0.000641
1	412257	412459	RLOC_00000131	.	+	95.78	0.1226	0.5139	0.7269	0.000641
1	407388	407467	RLOC_00000131	.	+	113.31	0.0436	0.6051	0.7905	0.000641
1	405950	406060	RLOC_00000131	.	+	126.73	-0.0870	0.7146	0.8575	0.000641
1	406131	406246	RLOC_00000131	.	+	141.19	0.2825	0.09567	0.2827	0.000641
1	407146	407320	RLOC_00000131	.	+	95.58	0.2294	0.257	0.4991	0.000641
1	406517	406720	RLOC_00000131	.	+	101.59	0.1764	0.2718	0.5148	0.000641
1	414216	414423	RLOC_00000132	.	-	21.93	nan	nan	nan	nan
1	417161	417247	RLOC_00000133	.	+	4.52	-1.1462	0.6259	0.8036	0.6885
1	416434	416742	RLOC_00000133	.	+	0.00	nan	nan	nan	0.6885
1	416434	416730	RLOC_00000133	.	+	0.45	-11.3419	0.9579	nan	0.6885
1	416837	416961	RLOC_00000133	.	+	0.66	0.0604	0.9396	nan	0.6885
1	415960	416044	RLOC_00000133	.	+	0.62	-11.7285	0.9736	nan	0.6885
1	417519	417622	RLOC_00000133	.	+	3.30	1.0571	0.09848	0.2876	0.6885
1	415669	415741	RLOC_00000133	.	+	0.00	nan	nan	nan	0.6885
1	419528	419674	RLOC_00000134	.	+	221.24	0.3935	0.03046	0.1436	0.0005817
1	421632	421719	RLOC_00000134	.	+	2.60	0.8040	0.3686	0.6091	0.0005817
1	421390	421525	RLOC_00000134	.	+	343.91	-0.1584	0.2002	0.4342	0.0005817
1	418876	418986	RLOC_00000134	.	+	181.30	0.7952	3.659e-06	0.0003648	0.0005817
1	421907	421980	RLOC_00000134	.	+	595.43	-0.4466	0.005512	0.05098	0.0005817
1	421632	421734	RLOC_00000134	.	+	410.16	-0.1087	0.6456	0.8156	0.0005817
1	421090	421190	RLOC_00000134	.	+	442.40	-0.1099	0.4586	0.6853	0.0005817
1	419209	419296	RLOC_00000134	.	+	255.43	0.3698	0.0353	0.157	0.0005817
1	419893	420513	RLOC_00000134	.	+	307.41	0.1943	0.2743	0.5174	0.0005817
1	420888	420983	RLOC_00000134	.	+	357.90	-0.2130	0.1423	0.3565	0.0005817
1	429369	429461	RLOC_00000137	.	-	19.23	0.3554	0.7921	0.9004	0.4034
1	430315	430413	RLOC_00000137	.	-	16.69	0.5083	0.8111	0.9105	0.4034
1	429098	429247	RLOC_00000137	.	-	23.81	0.3233	0.2598	0.5025	0.4034
1	429775	429850	RLOC_00000137	.	-	14.80	-0.6889	0.03562	0.1579	0.4034
1	429996	430068	RLOC_00000137	.	-	15.75	0.0713	0.9018	0.9561	0.4034
1	436127	436276	RLOC_00000139	.	-	0.89	-0.8309	0.3013	nan	0.998
1	435322	435449	RLOC_00000139	.	-	1.78	10.1913	1	nan	0.998
1	436538	436621	RLOC_00000139	.	-	0.71	-1.5620	0.2374	nan	0.998
1	435562	435649	RLOC_00000139	.	-	2.99	10.9969	0.3795	0.6189	0.998
1	435915	435996	RLOC_00000139	.	-	1.01	-0.6865	0.3715	nan	0.998
1	439313	439405	RLOC_00000140	.	-	0.00	nan	nan	nan	nan
1	438678	438782	RLOC_00000140	.	-	0.27	9.7387	0.7866	nan	nan
1	438922	439051	RLOC_00000140	.	-	0.13	8.6659	1	nan	nan
1	438333	438421	RLOC_00000140	.	-	0.00	nan	nan	nan	nan
1	438105	438217	RLOC_00000140	.	-	0.27	-15.9304	0.6308	nan	nan
1	442619	442717	RLOC_00000141	.	-	21.73	0.4843	0.1463	0.3622	0.8053
1	441012	441135	RLOC_00000141	.	-	72.78	-0.0167	0.5996	0.787	0.8053
1	441324	441397	RLOC_00000141	.	-	72.04	-0.3842	0.2705	0.5135	0.8053
1	442619	442803	RLOC_00000141	.	-	0.54	0.3816	0.8424	nan	0.8053
1	445751	445843	RLOC_00000142	.	-	130.21	0.0984	0.4996	0.7162	0.01796
1	444382	444488	RLOC_00000142	.	-	129.23	-0.3831	0.1714	0.3969	0.01796
1	445941	446029	RLOC_00000142	.	-	130.39	0.7003	0.000432	0.01005	0.01796
1	443524	443628	RLOC_00000142	.	-	159.47	-0.4929	0.02955	0.1411	0.01796
1	445065	445453	RLOC_00000142	.	-	118.56	0.2041	0.2216	0.4595	0.01796
1	444596	444682	RLOC_00000142	.	-	99.18	0.0163	0.8844	0.9475	0.01796
1	444088	444257	RLOC_00000142	.	-	130.54	0.0658	0.6824	0.8379	0.01796
1	445558	445647	RLOC_00000142	.	-	95.54	-0.1151	0.4464	0.6753	0.01796
1	444758	444845	RLOC_00000142	.	-	97.34	0.0225	0.8576	0.9343	0.01796
1	443735	443978	RLOC_00000142	.	-	139.47	-0.1590	0.4804	0.7021	0.01796
1	452065	452582	RLOC_00000143	.	-	33.85	0.8063	0.0257	0.1298	0.1848
1	450250	450360	RLOC_00000143	.	-	40.50	0.2231	0.4724	0.6959	0.1848
1	450257	450360	RLOC_00000143	.	-	293.07	0.2781	0.04741	0.187	0.1848
1	449837	449938	RLOC_00000143	.	-	352.85	0.2100	0.07506	0.2452	0.1848
1	448732	448811	RLOC_00000143	.	-	413.02	-0.4782	0.01071	0.07629	0.1848
1	449122	449224	RLOC_00000143	.	-	596.17	-0.1190	0.3408	0.584	0.1848
1	448972	449054	RLOC_00000143	.	-	667.09	-0.2636	0.05305	0.2001	0.1848
1	449488	449713	RLOC_00000143	.	-	344.84	0.2229	0.04492	0.1812	0.1848
1	450045	450150	RLOC_00000143	.	-	530.94	0.0975	0.2538	0.4958	0.1848
1	453364	453593	RLOC_00000144	.	+	95.11	0.4305	0.06229	0.2201	0.01609
1	454062	454169	RLOC_00000144	.	+	46.96	0.3542	0.2949	0.5383	0.01609
1	454062	454196	RLOC_00000144	.	+	0.00	nan	nan	nan	0.01609
1	454335	454414	RLOC_00000144	.	+	130.91	0.1615	0.3016	0.5454	0.01609
1	455146	455241	RLOC_00000144	.	+	309.00	-0.4624	0.0003743	0.009108	0.01609
1	455039	455111	RLOC_00000144	.	+	250.84	-0.3792	0.001811	0.02554	0.01609
1	453646	453729	RLOC_00000144	.	+	86.15	0.3758	0.01759	0.1028	0.01609
1	454062	454314	RLOC_00000144	.	+	0.55	12.6606	0.3692	nan	0.01609
1	454839	454926	RLOC_00000144	.	+	204.10	0.2928	0.03776	0.1638	0.01609
1	453809	453906	RLOC_00000144	.	+	100.82	0.3607	0.06319	0.222	0.01609
1	454539	454621	RLOC_00000144	.	+	206.90	0.0322	0.5579	0.7585	0.01609
1	454062	454414	RLOC_00000144	.	+	0.23	11.2380	0.8414	nan	0.01609
1	456760	456842	RLOC_00000145	.	+	370.98	0.0128	0.5766	0.7713	0.0005919
1	456645	456842	RLOC_00000145	.	+	1.58	1.1815	0.4314	nan	0.0005919
1	457626	457715	RLOC_00000145	.	+	1157.64	-0.3141	0.01029	0.07452	0.0005919
1	456230	456313	RLOC_00000145	.	+	367.68	0.4104	0.002913	0.03439	0.0005919
1	457428	457513	RLOC_00000145	.	+	759.40	-0.1722	0.2163	0.4535	0.0005919
1	455901	456177	RLOC_00000145	.	+	665.12	0.4131	3.751e-06	0.0003718	0.0005919
1	458085	458169	RLOC_00000145	.	+	0.00	nan	nan	nan	0.0005919
1	456645	456756	RLOC_00000145	.	+	401.79	0.0205	0.57	0.7669	0.0005919
1	457750	457839	RLOC_00000145	.	+	1080.36	-0.3119	0.02155	0.1165	0.0005919
1	457134	457210	RLOC_00000145	.	+	876.11	-0.1705	0.2193	0.4571	0.0005919
1	456916	457009	RLOC_00000145	.	+	516.54	0.1294	0.07916	0.2529	0.0005919
1	456393	456489	RLOC_00000145	.	+	540.83	0.2423	0.05557	0.2059	0.0005919
1	455901	456177	RLOC_00000146	.	-	2.08	-3.1267	0.9549	0.981	1
1	455334	456177	RLOC_00000146	.	-	0.14	8.9127	1	nan	1
1	456230	456313	RLOC_00000146	.	-	0.14	8.9127	1	nan	1
1	459142	459502	RLOC_00000147	.	-	4.79	0.6744	0.2722	0.5152	0.5706
1	458939	459020	RLOC_00000147	.	-	4.49	0.5382	0.429	0.661	0.5706
1	458635	458731	RLOC_00000147	.	-	3.01	0.2774	0.6884	0.8419	0.5706
1	459681	460322	RLOC_00000147	.	-	3.42	-2.6825	0.06563	0.2272	0.5706
1	454839	454926	RLOC_00000148	.	+	0.40	-0.0000	1	nan	nan
1	454968	471108	RLOC_00000148	.	+	0.40	0.0000	1	nan	nan
1	460635	461770	RLOC_00000149	.	+	0.00	nan	nan	nan	nan
1	467085	467185	RLOC_00000150	.	-	571.61	-0.1773	0.2701	0.5131	0.004254
1	466796	466957	RLOC_00000150	.	-	1003.21	-0.3553	0.003422	0.0379	0.004254
1	466246	466731	RLOC_00000150	.	-	1137.46	-0.3364	0.00229	0.02956	0.004254
1	462382	462474	RLOC_00000150	.	-	244.88	0.3581	0.03199	0.148	0.004254
1	467551	467683	RLOC_00000150	.	-	1014.72	-0.1156	0.4484	0.6772	0.004254
1	462799	462875	RLOC_00000150	.	-	237.79	0.6381	5.689e-05	0.002621	0.004254
1	462631	462726	RLOC_00000150	.	-	208.39	0.7431	6.097e-05	0.002743	0.004254
1	463619	463711	RLOC_00000150	.	-	1.01	-1.8421	0.5806	nan	0.004254
1	464522	464761	RLOC_00000150	.	-	95.47	0.1197	0.4953	0.7132	0.004254
1	463322	463420	RLOC_00000150	.	-	204.12	0.5730	0.001042	0.0179	0.004254
1	462998	463122	RLOC_00000150	.	-	192.54	0.5081	0.008625	0.0671	0.004254
1	470008	470346	RLOC_00000151	.	+	38.68	0.2785	0.2253	0.4638	0.6354
1	470481	470573	RLOC_00000151	.	+	110.41	-0.4676	0.08206	0.2583	0.6354
1	470287	470370	RLOC_00000151	.	+	0.00	nan	nan	nan	0.6354
1	471076	471155	RLOC_00000151	.	+	1.71	3.9405	0.00169	nan	0.6354
1	469970	470346	RLOC_00000151	.	+	17.58	0.0924	0.4762	0.6988	0.6354
1	469970	470251	RLOC_00000151	.	+	0.00	nan	nan	nan	0.6354
1	470481	470573	RLOC_00000152	.	-	0.84	-1.6723	0.9002	nan	nan
1	470008	470346	RLOC_00000152	.	-	0.06	9.6504	0.9409	nan	nan
1	467551	467683	RLOC_00000152	.	-	0.02	8.7095	0.9409	nan	nan
1	467701	486945	RLOC_00000152	.	-	0.02	8.7095	0.9409	nan	nan
1	472506	472667	RLOC_00000153	.	-	27.61	nan	nan	nan	nan
1	474886	475141	RLOC_00000154	.	+	23.50	nan	nan	nan	nan
1	478302	478524	RLOC_00000155	.	+	103.40	-0.3318	0.008979	0.0688	0.1641
1	478668	478789	RLOC_00000155	.	+	64.65	0.4773	0.02061	0.1132	0.1641
1	477204	477715	RLOC_00000155	.	+	58.73	0.2030	0.9222	0.9654	0.1641
1	481618	482269	RLOC_00000156	.	+	72.21	nan	nan	nan	nan
1	489061	489145	RLOC_00000157	.	+	21.78	0.0720	0.9775	0.992	1
1	487363	488719	RLOC_00000157	.	+	15.07	-0.0830	0.9724	0.9894	1
1	491378	491487	RLOC_00000159	.	+	117.77	0.5848	0.004941	0.04757	0.1066
1	491005	491233	RLOC_00000159	.	+	66.92	-0.0666	0.7852	0.8968	0.1066
1	492351	492442	RLOC_00000159	.	+	193.05	0.1262	0.4231	0.6562	0.1066
1	492522	492606	RLOC_00000159	.	+	186.57	-0.2276	0.237	0.4772	0.1066
1	492157	492247	RLOC_00000159	.	+	230.41	-0.0486	0.5629	0.7618	0.1066
1	491958	492085	RLOC_00000159	.	+	244.44	-0.0327	0.643	0.8141	0.1066
1	491113	491233	RLOC_00000159	.	+	0.14	-9.6554	0.7432	nan	0.1066
1	491802	491906	RLOC_00000159	.	+	242.16	-0.0618	0.6152	0.797	0.1066
1	495103	495201	RLOC_00000160	.	+	1.61	-0.8622	0.2677	nan	nan
1	495103	496612	RLOC_00000160	.	+	1.07	-0.3977	0.3284	nan	nan
1	496514	496612	RLOC_00000160	.	+	0.19	10.4991	0.9441	nan	nan
1	496735	496820	RLOC_00000160	.	+	1.13	13.1269	0.5533	nan	nan
1	495317	496618	RLOC_00000160	.	+	0.48	11.8782	0.7994	nan	nan
1	495488	495562	RLOC_00000161	.	-	0.41	9.6763	0.9671	nan	nan
1	495832	495911	RLOC_00000161	.	-	1.23	-1.4005	0.4199	nan	nan
1	495681	495756	RLOC_00000161	.	-	0.61	0.9905	1	nan	nan
1	495258	495349	RLOC_00000161	.	-	0.14	8.0790	0.8357	nan	nan
1	497240	497328	RLOC_00000162	.	-	0.54	-0.0000	1	nan	nan
1	496898	497164	RLOC_00000162	.	-	0.00	nan	nan	nan	nan
1	497090	497164	RLOC_00000162	.	-	0.54	0.0000	1	nan	nan
1	496669	496759	RLOC_00000162	.	-	0.00	nan	nan	nan	nan
1	496898	496971	RLOC_00000162	.	-	0.00	nan	nan	nan	nan
1	506533	506643	RLOC_00000164	.	-	0.71	-0.7070	0.9348	nan	1
1	505582	505844	RLOC_00000164	.	-	1.24	-0.4727	0.8718	nan	1
1	505406	505498	RLOC_00000164	.	-	0.60	12.0678	0.4347	nan	1
1	506183	506366	RLOC_00000164	.	-	4.96	-0.0627	0.9701	0.9883	1
1	506051	506136	RLOC_00000164	.	-	4.50	-0.0352	0.9485	0.9776	1
1	514799	514891	RLOC_00000165	.	-	479.04	0.2519	0.2132	0.4497	0
1	514033	514105	RLOC_00000165	.	-	320.95	-0.8144	5.122e-05	0.002437	0
1	514990	515092	RLOC_00000165	.	-	460.99	0.1631	0.3448	0.5877	0
1	512619	513146	RLOC_00000165	.	-	33.70	3.3263	1.022e-10	4.392e-08	0
1	514604	514704	RLOC_00000165	.	-	590.55	0.0068	0.9044	0.9572	0
1	512429	512524	RLOC_00000165	.	-	44.78	3.8465	6.416e-18	7.661e-15	0
1	511989	512073	RLOC_00000165	.	-	61.36	3.8242	1.284e-42	6.898e-39	0
1	512261	512377	RLOC_00000165	.	-	44.58	4.1914	6.646e-19	8.402e-16	0
1	514183	514270	RLOC_00000165	.	-	648.70	-0.5307	3.316e-13	2.27e-10	0
1	514469	514552	RLOC_00000165	.	-	759.21	-0.1970	0.001013	0.01758	0
1	514317	514421	RLOC_00000165	.	-	739.97	-0.4056	4.565e-06	0.000433	0
1	513245	513331	RLOC_00000165	.	-	30.86	4.1789	1.908e-10	7.738e-08	0
1	512120	512213	RLOC_00000165	.	-	43.23	5.2326	4.659e-37	1.788e-33	0
1	509314	519418	RLOC_00000166	.	+	0.06	nan	nan	nan	nan
1	509314	519418	RLOC_00000167	.	+	0.06	nan	nan	nan	nan
1	518377	519032	RLOC_00000168	.	+	184.63	-0.1320	0.2449	0.486	0.8632
1	518377	519035	RLOC_00000168	.	+	2539.16	0.0768	0.1839	0.4134	0.8632
1	520803	520889	RLOC_00000169	.	-	0.00	nan	nan	nan	nan
1	523875	524124	RLOC_00000170	.	+	0.00	nan	nan	nan	0.2294
1	527920	528009	RLOC_00000170	.	+	15.07	-0.3264	0.7702	0.8888	0.2294
1	525137	525223	RLOC_00000170	.	+	4.48	2.1364	0.01474	0.09261	0.2294
1	528308	528391	RLOC_00000170	.	+	8.53	-1.2337	0.1191	0.3209	0.2294
1	524836	524916	RLOC_00000170	.	+	5.17	0.5389	0.16	0.3812	0.2294
1	525461	525545	RLOC_00000170	.	+	5.58	1.2457	0.1084	0.3036	0.2294
1	524435	524520	RLOC_00000170	.	+	4.75	-0.1658	0.4002	0.6369	0.2294
1	524574	524661	RLOC_00000170	.	+	3.85	0.8148	0.1167	0.3171	0.2294
1	523674	524124	RLOC_00000170	.	+	4.20	-0.8327	0.5056	0.7206	0.2294
1	527576	527657	RLOC_00000170	.	+	12.25	-0.7703	0.6652	0.8277	0.2294
1	527201	527310	RLOC_00000170	.	+	2.88	-0.0364	0.2188	0.4565	0.2294
1	530901	530979	RLOC_00000171	.	+	0.31	1.0636	0.9466	nan	nan
1	533004	533078	RLOC_00000171	.	+	0.38	14.7031	0.6468	nan	nan
1	533344	533452	RLOC_00000171	.	+	1.28	-15.9981	0.3115	nan	nan
1	530577	530680	RLOC_00000171	.	+	0.79	2.5584	1	nan	nan
1	534106	534188	RLOC_00000171	.	+	1.75	-3.9014	0.9041	nan	nan
1	530098	530181	RLOC_00000171	.	+	0.58	15.3274	0.4987	nan	nan
1	530235	530402	RLOC_00000171	.	+	0.20	13.8841	0.803	nan	nan
1	531217	531324	RLOC_00000171	.	+	0.11	-12.5575	0.9656	nan	nan
1	533715	533807	RLOC_00000171	.	+	0.31	-13.9492	0.8997	nan	nan
1	522204	539853	RLOC_00000173	.	+	0.06	nan	nan	nan	nan
1	538129	538208	RLOC_00000174	.	+	1758.29	0.1276	0.1724	0.3982	0.2278
1	539007	539254	RLOC_00000174	.	+	2160.65	-0.1753	0.02441	0.1256	0.2278
1	539288	539390	RLOC_00000174	.	+	2116.90	-0.0821	0.09328	0.2784	0.2278
1	538327	538418	RLOC_00000174	.	+	2141.50	0.2040	0.01457	0.09195	0.2278
1	538718	538807	RLOC_00000174	.	+	1768.43	-0.0280	0.6815	0.8374	0.2278
1	539478	539610	RLOC_00000174	.	+	2110.70	0.0279	0.9476	0.9772	0.2278
1	538852	538935	RLOC_00000174	.	+	2089.84	-0.1113	0.1767	0.4041	0.2278
1	538532	538626	RLOC_00000174	.	+	1506.71	0.1348	0.1262	0.3323	0.2278
1	539998	556867	RLOC_00000175	.	+	0.07	nan	nan	nan	nan
1	539998	556867	RLOC_00000176	.	+	0.07	nan	nan	nan	nan
1	548601	548814	RLOC_00000177	.	+	0.07	-1.8607	0.6042	nan	nan
1	546399	546511	RLOC_00000177	.	+	0.14	-0.8751	0.631	nan	nan
1	546773	546870	RLOC_00000177	.	+	0.00	nan	nan	nan	nan
1	547878	547969	RLOC_00000177	.	+	0.54	1.0291	0.6718	nan	nan
1	546938	547023	RLOC_00000177	.	+	0.00	nan	nan	nan	nan
1	547171	547247	RLOC_00000177	.	+	0.00	nan	nan	nan	nan
1	548180	548310	RLOC_00000177	.	+	0.00	nan	nan	nan	nan
1	545061	545631	RLOC_00000177	.	+	0.00	nan	nan	nan	nan
1	547373	547462	RLOC_00000177	.	+	0.00	nan	nan	nan	nan
1	546636	546726	RLOC_00000177	.	+	0.28	0.1132	0.6614	nan	nan
1	547670	547747	RLOC_00000177	.	+	0.00	nan	nan	nan	nan
1	548050	548133	RLOC_00000177	.	+	0.00	nan	nan	nan	nan
1	544803	544972	RLOC_00000177	.	+	0.24	-0.0837	0.6718	nan	nan
1	548438	548524	RLOC_00000177	.	+	0.30	0.2700	0.6874	nan	nan
1	546234	546312	RLOC_00000177	.	+	0.00	nan	nan	nan	nan
1	545962	546061	RLOC_00000177	.	+	0.00	nan	nan	nan	nan
1	548032	551009	RLOC_00000178	.	-	0.34	0.2577	0.9346	nan	nan
1	551094	551346	RLOC_00000178	.	-	0.48	-0.2256	0.9346	nan	nan
1	552372	552455	RLOC_00000179	.	-	0.00	nan	nan	nan	nan
1	552181	552274	RLOC_00000179	.	-	0.00	nan	nan	nan	nan
1	552505	552686	RLOC_00000179	.	-	0.00	nan	nan	nan	nan
1	539998	556867	RLOC_00000180	.	+	0.07	nan	nan	nan	nan
1	555642	555725	RLOC_00000181	.	-	440.19	0.1832	0.1263	0.3324	0.00348
1	553676	554471	RLOC_00000181	.	-	417.07	0.2089	0.09753	0.2859	0.00348
1	553260	553394	RLOC_00000181	.	-	367.02	-0.5319	4.314e-05	0.002171	0.00348
1	554612	554795	RLOC_00000181	.	-	272.30	-0.0229	0.9463	0.9765	0.00348
1	553489	553599	RLOC_00000181	.	-	328.08	0.1353	0.1814	0.4104	0.00348
1	554862	555571	RLOC_00000181	.	-	319.00	-0.0833	0.5636	0.7623	0.00348
1	554862	555023	RLOC_00000181	.	-	0.13	9.9112	0.8425	nan	0.00348
1	558612	558707	RLOC_00000182	.	-	0.11	-0.1792	0.9699	nan	1
1	558119	558208	RLOC_00000182	.	-	8.01	0.0475	0.8285	0.9197	1
1	557990	558065	RLOC_00000182	.	-	2.07	-0.0647	0.8186	0.9144	1
1	558174	558267	RLOC_00000183	.	+	2.22	nan	nan	nan	nan
1	557107	557316	RLOC_00000183	.	+	0.00	nan	nan	nan	nan
1	561694	561901	RLOC_00000185	.	-	6.31	0.0896	0.7593	0.8829	1
1	561319	561452	RLOC_00000185	.	-	0.44	-0.4828	0.8349	nan	1
1	565952	566042	RLOC_00000186	.	+	128.33	-0.2206	0.06942	0.2345	0.04533
1	564696	565432	RLOC_00000186	.	+	170.92	0.5171	0.001505	0.02273	0.04533
1	566139	566225	RLOC_00000186	.	+	152.01	-0.1245	0.5806	0.7742	0.04533
1	565710	565783	RLOC_00000186	.	+	143.14	-0.0767	0.1667	0.3906	0.04533
1	568738	568831	RLOC_00000187	.	+	7.41	-0.1285	0.805	0.9072	1
1	569222	569304	RLOC_00000187	.	+	7.95	0.1250	0.8058	0.9077	1
1	572758	572835	RLOC_00000188	.	-	243.46	-0.3863	0.01164	0.0802	0.1955
1	573251	573337	RLOC_00000188	.	-	202.83	0.0571	0.3985	0.6355	0.1955
1	573396	573488	RLOC_00000188	.	-	227.69	0.1257	0.2718	0.5148	0.1955
1	573952	574119	RLOC_00000188	.	-	213.73	0.1496	0.2119	0.4482	0.1955
1	579524	579646	RLOC_00000189	.	+	13.71	0.4181	0.1218	0.3254	0.5421
1	578790	578894	RLOC_00000189	.	+	10.91	0.4810	0.5671	0.7649	0.5421
1	579016	579195	RLOC_00000189	.	+	10.60	0.6435	0.1724	0.3982	0.5421
1	577940	577978	RLOC_00000189	.	+	0.00	nan	nan	nan	0.5421
1	578450	578534	RLOC_00000189	.	+	4.64	0.6873	0.4361	0.6669	0.5421
1	578078	578180	RLOC_00000189	.	+	0.00	nan	nan	nan	0.5421
1	576612	576849	RLOC_00000189	.	+	4.02	-1.0999	0.3632	0.6042	0.5421
1	578051	578180	RLOC_00000189	.	+	10.75	-0.6784	0.1667	0.3905	0.5421
1	578243	578545	RLOC_00000189	.	+	0.00	nan	nan	nan	0.5421
1	578243	578331	RLOC_00000189	.	+	6.62	0.3745	0.6265	0.804	0.5421
1	579311	579420	RLOC_00000189	.	+	15.84	-0.6597	0.3808	0.6201	0.5421
1	576911	576993	RLOC_00000189	.	+	3.67	0.0101	0.4615	0.6875	0.5421
1	579966	580049	RLOC_00000189	.	+	4.00	1.6193	0.0599	0.2152	0.5421
1	577905	577978	RLOC_00000189	.	+	6.75	-0.8127	0.2312	0.4706	0.5421
1	576144	576547	RLOC_00000189	.	+	0.00	nan	nan	nan	0.5421
1	578619	578721	RLOC_00000189	.	+	7.51	-0.3772	0.4163	0.6508	0.5421
1	577591	577783	RLOC_00000189	.	+	6.34	0.2608	0.8587	0.9349	0.5421
1	580129	580226	RLOC_00000189	.	+	9.90	0.1485	0.639	0.812	0.5421
1	579798	579878	RLOC_00000189	.	+	19.68	-0.1228	0.9923	0.9994	0.5421
1	581314	581496	RLOC_00000190	.	+	129.72	0.1381	0.3131	0.5571	0.06937
1	580744	581069	RLOC_00000190	.	+	96.85	0.1955	0.3416	0.5848	0.06937
1	581185	581277	RLOC_00000190	.	+	143.55	0.1812	0.1816	0.4106	0.06937
1	581717	581814	RLOC_00000190	.	+	189.30	-0.3032	0.0027	0.03267	0.06937
1	581555	581643	RLOC_00000190	.	+	145.96	0.0121	0.8566	0.9338	0.06937
1	586319	586438	RLOC_00000192	.	+	44.07	-0.0510	0.9615	0.9843	0.09941
1	586100	586191	RLOC_00000192	.	+	54.49	-0.7676	0.04385	0.1789	0.09941
1	585684	585775	RLOC_00000192	.	+	0.00	nan	nan	nan	0.09941
1	585367	585499	RLOC_00000192	.	+	25.21	0.4638	0.1915	0.4236	0.09941
1	584955	585052	RLOC_00000192	.	+	39.08	0.5056	0.02382	0.1238	0.09941
1	584617	584859	RLOC_00000192	.	+	37.69	0.3823	0.1943	0.4272	0.09941
1	586565	586648	RLOC_00000192	.	+	60.68	-0.2878	0.1293	0.337	0.09941
1	585941	586022	RLOC_00000192	.	+	41.41	-0.5786	0.141	0.3548	0.09941
1	585684	585778	RLOC_00000192	.	+	49.09	-0.0146	0.769	0.8882	0.09941
1	585143	585236	RLOC_00000192	.	+	43.51	0.7629	0.00448	0.0447	0.09941
1	590002	590400	RLOC_00000193	.	+	0.00	nan	nan	nan	nan
1	588539	588662	RLOC_00000193	.	+	10.34	nan	nan	nan	nan
1	587664	599759	RLOC_00000194	.	-	0.07	-0.0000	1	nan	nan
1	599811	599891	RLOC_00000194	.	-	0.07	0.0000	1	nan	nan
1	593228	593865	RLOC_00000195	.	+	66.06	nan	nan	nan	nan
1	596477	596571	RLOC_00000196	.	-	36.77	-0.0724	0.6827	0.8382	1
1	597381	597520	RLOC_00000196	.	-	51.22	0.0628	0.6578	0.8232	1
1	600975	601226	RLOC_00000197	.	-	107.91	0.0283	0.9583	0.9827	0.234
1	600233	600433	RLOC_00000197	.	-	69.96	0.1007	0.5868	0.7783	0.234
1	599811	599891	RLOC_00000197	.	-	80.02	-0.4930	0.03705	0.162	0.234
1	601371	601546	RLOC_00000197	.	-	51.87	0.5306	0.01518	0.09432	0.234
1	600512	600720	RLOC_00000197	.	-	69.36	0.0086	0.9711	0.9888	0.234
1	599975	600064	RLOC_00000197	.	-	81.29	-0.6112	0.02074	0.1137	0.234
1	601705	601811	RLOC_00000197	.	-	40.30	0.2716	0.1584	0.379	0.234
1	600824	600935	RLOC_00000197	.	-	84.80	-0.0582	0.723	0.8623	0.234
1	601559	601652	RLOC_00000197	.	-	46.81	0.5238	0.02155	0.1165	0.234
1	602753	602979	RLOC_00000198	.	+	102.51	0.3417	0.2253	0.4639	0.889
1	603638	603783	RLOC_00000198	.	+	0.00	nan	nan	nan	0.889
1	603124	603600	RLOC_00000198	.	+	103.39	-0.0172	0.8112	0.9105	0.889
1	603677	603774	RLOC_00000198	.	+	109.59	-0.1388	0.2036	0.4386	0.889
1	606321	606528	RLOC_00000200	.	-	31.41	-0.3553	0.6652	0.8277	0.769
1	605603	605704	RLOC_00000200	.	-	11.99	0.5983	0.1295	0.3372	0.769
1	605402	605514	RLOC_00000200	.	-	19.48	0.2075	0.1712	0.3966	0.769
1	605804	605918	RLOC_00000200	.	-	11.35	0.4795	0.2506	0.492	0.769
1	606101	606175	RLOC_00000200	.	-	10.40	-1.2548	0.1655	0.389	0.769
1	608710	608815	RLOC_00000201	.	-	5924.39	0.1823	0.09771	0.2863	0.07666
1	608146	608241	RLOC_00000201	.	-	6708.07	-0.2743	0.0232	0.1219	0.07666
1	608308	608397	RLOC_00000201	.	-	8895.94	-0.2243	0.0146	0.09208	0.07666
1	608937	609279	RLOC_00000201	.	-	8102.65	0.3405	0.003093	0.03569	0.07666
1	611919	612018	RLOC_00000202	.	-	0.00	nan	nan	nan	nan
1	611528	611617	RLOC_00000202	.	-	0.00	nan	nan	nan	nan
1	610934	611025	RLOC_00000202	.	-	0.00	nan	nan	nan	nan
1	614813	614988	RLOC_00000203	.	-	13.08	-0.2042	0.3829	0.6219	0.3325
1	613705	613993	RLOC_00000203	.	-	13.84	-0.4948	0.1679	0.392	0.3325
1	614344	614448	RLOC_00000203	.	-	12.96	0.1119	0.6114	0.7948	0.3325
1	615482	615851	RLOC_00000203	.	-	7.83	2.0503	0.0259	0.1304	0.3325
1	615188	615276	RLOC_00000203	.	-	5.72	0.2239	0.9018	0.956	0.3325
1	614156	614239	RLOC_00000203	.	-	13.71	-0.6475	0.2631	0.5058	0.3325
1	614609	614721	RLOC_00000203	.	-	8.93	0.2872	0.5853	0.7772	0.3325
1	619327	619638	RLOC_00000204	.	+	22.97	nan	nan	nan	nan
1	620738	633020	RLOC_00000205	.	+	0.08	nan	nan	nan	nan
1	620738	633020	RLOC_00000206	.	+	0.08	-6.7835	1	nan	1
1	622138	622241	RLOC_00000206	.	+	3.90	0.0834	1	1	1
1	624133	624230	RLOC_00000207	.	-	1404.34	nan	nan	nan	nan
1	625291	625372	RLOC_00000208	.	-	1.35	nan	nan	nan	nan
1	627381	627481	RLOC_00000209	.	+	698.99	0.1564	0.06285	0.2212	0.03917
1	626827	626912	RLOC_00000209	.	+	491.16	0.2731	0.0065	0.05634	0.03917
1	628855	628945	RLOC_00000209	.	+	32.63	-0.0219	0.8164	0.9131	0.03917
1	627613	627700	RLOC_00000209	.	+	1402.75	0.1056	0.01343	0.08748	0.03917
1	628855	628934	RLOC_00000209	.	+	193.43	-0.1878	0.5645	0.7631	0.03917
1	627891	627969	RLOC_00000209	.	+	981.07	-0.0535	0.6944	0.8457	0.03917
1	628167	628245	RLOC_00000209	.	+	754.91	-0.1417	0.2353	0.4753	0.03917
1	629320	629417	RLOC_00000209	.	+	930.91	-0.2970	0.008539	0.06671	0.03917
1	627164	627307	RLOC_00000209	.	+	659.80	0.2376	0.02608	0.131	0.03917
1	628468	628776	RLOC_00000209	.	+	167.14	-0.0583	0.9487	0.9777	0.03917
1	628018	628111	RLOC_00000209	.	+	720.04	-0.1484	0.1241	0.329	0.03917
1	628468	628934	RLOC_00000209	.	+	11.86	0.1004	0.8116	0.9107	0.03917
1	626827	626916	RLOC_00000209	.	+	140.82	0.0327	0.6925	0.8445	0.03917
1	627003	627099	RLOC_00000209	.	+	1028.00	0.2165	0.001237	0.02	0.03917
1	629493	629579	RLOC_00000209	.	+	675.35	-0.5408	0.005349	0.05009	0.03917
1	627746	627834	RLOC_00000209	.	+	1393.65	0.0230	0.416	0.6505	0.03917
1	628468	629287	RLOC_00000209	.	+	622.96	-0.2789	0.01387	0.0892	0.03917
1	632805	632883	RLOC_00000210	.	+	375.34	-0.5518	2.847e-07	4.88e-05	6.131e-05
1	631857	631927	RLOC_00000210	.	+	19.98	-0.3925	0.2946	0.5381	6.131e-05
1	632805	632880	RLOC_00000210	.	+	8.90	-0.4025	0.9058	0.958	6.131e-05
1	632347	632420	RLOC_00000210	.	+	376.59	-0.0468	0.9282	0.9684	6.131e-05
1	631032	631103	RLOC_00000210	.	+	237.37	0.4454	0.0003594	0.008855	6.131e-05
1	632042	632127	RLOC_00000210	.	+	302.38	-0.1263	0.3527	0.5948	6.131e-05
1	631857	632008	RLOC_00000210	.	+	146.55	-0.0964	0.5809	0.7743	6.131e-05
1	630894	630977	RLOC_00000210	.	+	221.63	0.3317	0.0203	0.1121	6.131e-05
1	631178	631264	RLOC_00000210	.	+	252.51	0.4730	2.071e-07	3.697e-05	6.131e-05
1	632448	632527	RLOC_00000210	.	+	413.32	-0.1572	0.2014	0.4358	6.131e-05
1	632614	632715	RLOC_00000210	.	+	376.72	-0.4063	0.01656	0.09915	6.131e-05
1	632564	632715	RLOC_00000210	.	+	4.10	-0.1853	0.7781	0.8932	6.131e-05
1	631335	631430	RLOC_00000210	.	+	225.56	0.3566	0.04996	0.193	6.131e-05
1	631517	631602	RLOC_00000210	.	+	191.34	0.1508	0.5755	0.7706	6.131e-05
1	630702	630831	RLOC_00000210	.	+	173.13	0.2902	0.1284	0.3354	6.131e-05
1	636885	636983	RLOC_00000211	.	+	1.88	-1.3769	0.692	nan	0.4726
1	636358	636591	RLOC_00000211	.	+	192.63	-0.0134	0.936	0.9718	0.4726
1	636885	636977	RLOC_00000211	.	+	280.60	-0.1181	0.3739	0.6137	0.4726
1	635985	636080	RLOC_00000211	.	+	188.22	0.3224	0.1222	0.3259	0.4726
1	636728	636827	RLOC_00000211	.	+	284.42	-0.2039	0.04692	0.1859	0.4726
1	635650	635738	RLOC_00000211	.	+	161.97	0.3344	0.136	0.3471	0.4726
1	637722	638257	RLOC_00000213	.	-	166.33	0.1185	0.3645	0.6054	0.9922
1	637513	637601	RLOC_00000213	.	-	198.25	-0.1121	0.3572	0.5988	0.9922
1	637722	638257	RLOC_00000214	.	+	0.39	nan	nan	nan	nan
1	639019	641428	RLOC_00000215	.	-	1.61	nan	nan	nan	nan
1	642004	657951	RLOC_00000216	.	+	0.05	nan	nan	nan	nan
1	644255	644349	RLOC_00000217	.	-	54.69	0.2521	0.4791	0.7011	0.002078
1	643948	644141	RLOC_00000217	.	-	3.19	14.4883	2.11e-05	0.001329	0.002078
1	643744	643876	RLOC_00000217	.	-	65.02	0.1989	0.493	0.7114	0.002078
1	644477	644605	RLOC_00000217	.	-	0.00	nan	nan	nan	0.002078
1	643207	643304	RLOC_00000217	.	-	83.55	-0.1387	0.2939	0.5374	0.002078
1	643948	644159	RLOC_00000217	.	-	63.76	0.0677	0.7791	0.8937	0.002078
1	643553	643643	RLOC_00000217	.	-	71.77	-0.3258	0.06094	0.2174	0.002078
1	644260	644349	RLOC_00000217	.	-	38.08	0.1904	0.5441	0.749	0.002078
1	646488	646566	RLOC_00000218	.	-	287.53	-0.1543	0.4284	0.6606	1.725e-05
1	649674	649761	RLOC_00000218	.	-	154.01	0.6072	0.0002901	0.007726	1.725e-05
1	650437	650562	RLOC_00000218	.	-	167.84	0.2378	0.08462	0.263	1.725e-05
1	648828	648910	RLOC_00000218	.	-	160.91	0.6826	0.0002367	0.006776	1.725e-05
1	646955	647037	RLOC_00000218	.	-	223.41	0.2654	0.1026	0.2945	1.725e-05
1	649138	649367	RLOC_00000218	.	-	189.80	0.3792	0.002765	0.03317	1.725e-05
1	645678	645754	RLOC_00000218	.	-	335.43	-0.4149	0.01933	0.1088	1.725e-05
1	651538	651710	RLOC_00000218	.	-	143.72	0.6647	0.0002746	0.007437	1.725e-05
1	647279	647366	RLOC_00000218	.	-	219.96	-0.0871	0.926	0.9673	1.725e-05
1	647106	647183	RLOC_00000218	.	-	212.11	0.2666	0.0551	0.2048	1.725e-05
1	646688	646776	RLOC_00000218	.	-	285.73	-0.0630	0.9327	0.9703	1.725e-05
1	648274	648361	RLOC_00000218	.	-	151.26	0.2544	0.05778	0.2106	1.725e-05
1	646309	646566	RLOC_00000218	.	-	0.20	9.4441	0.9197	nan	1.725e-05
1	647806	647923	RLOC_00000218	.	-	187.38	0.0304	0.4127	0.6478	1.725e-05
1	648655	648765	RLOC_00000218	.	-	133.35	0.5089	0.000604	0.0125	1.725e-05
1	649458	649550	RLOC_00000218	.	-	141.19	0.4955	0.1411	0.3549	1.725e-05
1	647619	647702	RLOC_00000218	.	-	254.75	-0.0379	0.7331	0.8681	1.725e-05
1	650903	651127	RLOC_00000218	.	-	128.99	0.3506	0.04566	0.183	1.725e-05
1	651218	651319	RLOC_00000218	.	-	105.34	0.4100	0.01925	0.1086	1.725e-05
1	645813	645898	RLOC_00000218	.	-	398.55	-0.4817	0.01592	0.09697	1.725e-05
1	645484	645574	RLOC_00000218	.	-	403.33	-0.7309	4.222e-08	9.779e-06	1.725e-05
1	648431	648507	RLOC_00000218	.	-	138.63	0.0139	0.5712	0.7677	1.725e-05
1	647994	648101	RLOC_00000218	.	-	209.80	0.0502	0.3577	0.5992	1.725e-05
1	650708	650790	RLOC_00000218	.	-	78.72	0.7832	0.001271	0.02036	1.725e-05
1	646036	646125	RLOC_00000218	.	-	310.10	-0.5551	0.00131	0.0207	1.725e-05
1	646309	646405	RLOC_00000218	.	-	458.06	-0.5604	0.0008065	0.01513	1.725e-05
1	647441	647530	RLOC_00000218	.	-	239.10	0.0578	0.2785	0.5219	1.725e-05
1	646311	659830	RLOC_00000219	.	-	0.02	nan	nan	nan	nan
1	656744	656826	RLOC_00000220	.	-	245.71	0.2910	0.07876	0.2523	0.0004655
1	656504	656587	RLOC_00000220	.	-	504.10	0.1519	0.08163	0.2574	0.0004655
1	656028	656133	RLOC_00000220	.	-	414.68	-0.4220	2.733e-06	0.0002911	0.0004655
1	657494	657855	RLOC_00000220	.	-	194.31	0.4214	0.02399	0.1242	0.0004655
1	657057	657141	RLOC_00000220	.	-	388.24	0.2827	0.09389	0.2795	0.0004655
1	655822	655932	RLOC_00000220	.	-	555.14	-0.5350	0.001706	0.02459	0.0004655
1	657276	657391	RLOC_00000220	.	-	191.98	0.6346	0.006483	0.05626	0.0004655
1	656233	656316	RLOC_00000220	.	-	377.48	-0.0102	0.8674	0.9393	0.0004655
1	659470	659555	RLOC_00000221	.	-	109.32	0.0673	0.4143	0.6491	1
1	659315	659422	RLOC_00000221	.	-	102.41	-0.0695	0.414	0.6487	1
1	661789	661900	RLOC_00000222	.	-	138.18	-0.2078	0.113	0.311	0.7287
1	662252	662333	RLOC_00000222	.	-	0.00	nan	nan	nan	0.7287
1	661948	662041	RLOC_00000222	.	-	139.28	0.2085	0.1125	0.3103	0.7287
1	663901	664016	RLOC_00000223	.	-	2.71	-1.2508	0.1881	0.4189	0.8693
1	664129	664204	RLOC_00000223	.	-	2.15	0.5183	0.5695	0.7664	0.8693
1	663544	663614	RLOC_00000223	.	-	0.87	11.2331	1	nan	0.8693
1	663662	663759	RLOC_00000223	.	-	1.94	1.7082	0.5782	nan	0.8693
1	665776	665861	RLOC_00000224	.	-	54.83	-0.0082	0.7929	0.9008	0.672
1	665776	665857	RLOC_00000224	.	-	0.00	nan	nan	nan	0.672
1	666261	666350	RLOC_00000224	.	-	3.82	-1.5167	0.2052	0.4403	0.672
1	666255	666350	RLOC_00000224	.	-	27.06	-0.4232	0.2849	0.5283	0.672
1	665909	666113	RLOC_00000224	.	-	44.78	0.1602	0.09312	0.2781	0.672
1	665233	665249	RLOC_00000224	.	-	0.00	nan	nan	nan	0.672
1	665444	665894	RLOC_00000225	.	+	0.00	nan	nan	nan	nan
1	665975	666119	RLOC_00000225	.	+	0.00	nan	nan	nan	nan
1	669133	669226	RLOC_00000226	.	-	84.44	0.4684	0.03504	0.1562	0.004222
1	668081	668172	RLOC_00000226	.	-	104.91	-0.2806	0.2739	0.5168	0.004222
1	668744	668855	RLOC_00000226	.	-	67.38	0.2107	0.2793	0.5225	0.004222
1	667463	667540	RLOC_00000226	.	-	65.80	-0.4334	0.06033	0.216	0.004222
1	669649	669749	RLOC_00000226	.	-	62.00	0.5015	0.02234	0.1191	0.004222
1	667867	667956	RLOC_00000226	.	-	109.85	-0.2155	0.4669	0.6915	0.004222
1	667067	667150	RLOC_00000226	.	-	117.39	-0.6244	0.0057	0.05194	0.004222
1	667280	667372	RLOC_00000226	.	-	114.48	-0.7097	5.624e-05	0.002605	0.004222
1	669512	669619	RLOC_00000226	.	-	90.52	0.2189	0.1772	0.4047	0.004222
1	667436	667540	RLOC_00000226	.	-	44.24	-0.2292	0.9395	0.9732	0.004222
1	668467	668612	RLOC_00000226	.	-	74.66	0.4807	0.06299	0.2216	0.004222
1	667640	667734	RLOC_00000226	.	-	117.86	0.0028	0.9162	0.9625	0.004222
1	669265	669460	RLOC_00000226	.	-	91.32	0.6620	0.001109	0.01862	0.004222
1	668986	669078	RLOC_00000226	.	-	92.81	0.4102	0.04794	0.1882	0.004222
1	672547	672650	RLOC_00000227	.	-	0.00	nan	nan	nan	nan
1	671782	671918	RLOC_00000227	.	-	0.00	nan	nan	nan	nan
1	671973	672105	RLOC_00000227	.	-	0.00	nan	nan	nan	nan
1	672144	672331	RLOC_00000227	.	-	0.00	nan	nan	nan	nan
1	672405	672517	RLOC_00000227	.	-	0.00	nan	nan	nan	nan
1	673705	673963	RLOC_00000228	.	+	9.43	-0.3900	0.9967	1	0.5779
1	675493	675591	RLOC_00000228	.	+	12.49	-0.3637	0.6732	0.8324	0.5779
1	675076	675186	RLOC_00000228	.	+	6.22	1.2253	0.06741	0.2306	0.5779
1	674164	674440	RLOC_00000228	.	+	8.48	0.3719	0.2182	0.4558	0.5779
1	674703	674812	RLOC_00000228	.	+	8.03	0.8070	0.3272	0.571	0.5779
1	675944	676043	RLOC_00000228	.	+	16.08	-0.7251	0.09207	0.2762	0.5779
1	674023	674098	RLOC_00000228	.	+	8.07	-0.1136	0.5566	0.7576	0.5779
1	675226	675339	RLOC_00000228	.	+	8.70	-0.1581	0.6377	0.8113	0.5779
1	674879	674967	RLOC_00000228	.	+	6.34	0.8565	0.3657	0.6065	0.5779
1	679996	680102	RLOC_00000229	.	+	0.21	10.3163	0.7538	nan	nan
1	678001	678093	RLOC_00000229	.	+	0.00	nan	nan	nan	nan
1	681024	681110	RLOC_00000229	.	+	0.59	-4.8798	0.4555	nan	nan
1	679729	679820	RLOC_00000229	.	+	0.13	9.5516	0.7309	nan	nan
1	679287	679367	RLOC_00000229	.	+	0.00	nan	nan	nan	nan
1	677433	677850	RLOC_00000229	.	+	0.00	nan	nan	nan	nan
1	680483	680558	RLOC_00000229	.	+	0.06	8.5864	0.7266	nan	nan
1	679059	679147	RLOC_00000229	.	+	0.15	9.9372	0.7506	nan	nan
1	680263	680340	RLOC_00000229	.	+	0.47	11.5262	0.8166	nan	nan
1	678521	678591	RLOC_00000229	.	+	0.00	nan	nan	nan	nan
1	678872	678970	RLOC_00000229	.	+	0.00	nan	nan	nan	nan
1	679489	679577	RLOC_00000229	.	+	0.13	9.5516	0.7309	nan	nan
1	678192	678288	RLOC_00000229	.	+	0.00	nan	nan	nan	nan
1	680776	680857	RLOC_00000229	.	+	0.42	11.3218	0.8338	nan	nan
1	681920	682242	RLOC_00000230	.	-	116.20	-0.8193	3.224e-05	0.001774	0.002818
1	686604	686678	RLOC_00000230	.	-	33.28	0.9521	0.004757	0.04637	0.002818
1	682091	682242	RLOC_00000230	.	-	0.00	nan	nan	nan	0.002818
1	686423	686504	RLOC_00000230	.	-	40.76	1.3756	0.0004187	0.009841	0.002818
1	687008	687106	RLOC_00000230	.	-	0.48	12.7987	0.9065	nan	0.002818
1	682891	683022	RLOC_00000230	.	-	2.33	-0.8291	0.5221	0.7328	0.002818
1	683076	683174	RLOC_00000230	.	-	0.24	11.8994	0.9037	nan	0.002818
1	682402	682731	RLOC_00000230	.	-	101.89	-0.2466	0.2269	0.4658	0.002818
1	682891	683174	RLOC_00000230	.	-	66.64	-0.4923	0.03392	0.1532	0.002818
1	683316	683401	RLOC_00000230	.	-	65.65	0.1336	0.833	0.922	0.002818
1	686750	686843	RLOC_00000230	.	-	36.64	0.4966	0.06742	0.2306	0.002818
1	685964	686055	RLOC_00000230	.	-	44.13	0.7617	0.008908	0.06851	0.002818
1	684776	684863	RLOC_00000230	.	-	44.41	0.3992	0.09174	0.2756	0.002818
1	686596	686678	RLOC_00000230	.	-	0.00	nan	nan	nan	0.002818
1	687008	687114	RLOC_00000230	.	-	0.00	nan	nan	nan	0.002818
1	689812	689984	RLOC_00000231	.	-	84.60	0.3461	0.05361	0.2013	0.07464
1	690172	690398	RLOC_00000231	.	-	95.20	0.3011	0.18	0.4084	0.07464
1	688145	688280	RLOC_00000231	.	-	228.30	-0.3339	0.1381	0.3501	0.07464
1	691363	691442	RLOC_00000231	.	-	49.79	0.8365	0.002974	0.03485	0.07464
1	689408	689531	RLOC_00000231	.	-	133.71	-0.1890	0.3537	0.5956	0.07464
1	690578	690756	RLOC_00000231	.	-	66.00	0.3729	0.1191	0.3209	0.07464
1	691755	691898	RLOC_00000231	.	-	1.80	1.0257	0.338	nan	0.07464
1	690897	691120	RLOC_00000231	.	-	72.96	0.4811	0.05248	0.1988	0.07464
1	689157	689250	RLOC_00000231	.	-	203.08	0.0326	0.7352	0.8694	0.07464
1	692077	692174	RLOC_00000231	.	-	97.62	0.7367	0.01002	0.07333	0.07464
1	688949	689035	RLOC_00000231	.	-	134.05	-0.2804	0.1619	0.384	0.07464
1	688601	688678	RLOC_00000231	.	-	146.48	-0.3243	0.009725	0.07211	0.07464
1	688363	688457	RLOC_00000231	.	-	151.06	-0.2909	0.04651	0.185	0.07464
1	695475	695546	RLOC_00000232	.	+	2.34	-0.1022	0.6379	0.8113	1
1	694182	694279	RLOC_00000232	.	+	0.00	nan	nan	nan	1
1	695792	695886	RLOC_00000232	.	+	0.84	0.5707	0.8888	nan	1
1	694037	694116	RLOC_00000232	.	+	0.00	nan	nan	nan	1
1	693570	694116	RLOC_00000232	.	+	0.32	-1.5426	0.7815	nan	1
1	693582	698187	RLOC_00000233	.	-	0.41	nan	nan	nan	nan
1	702182	702275	RLOC_00000234	.	+	105.19	0.1684	0.4745	0.6976	0.1635
1	703380	703481	RLOC_00000234	.	+	106.58	-0.3994	0.03751	0.1632	0.1635
1	702018	702105	RLOC_00000234	.	+	91.51	0.0722	0.7297	0.866	0.1635
1	702467	702566	RLOC_00000234	.	+	109.54	0.1330	0.5062	0.7209	0.1635
1	703097	703194	RLOC_00000234	.	+	122.06	-0.3065	0.0915	0.2751	0.1635
1	702736	702827	RLOC_00000234	.	+	71.81	0.0834	0.7132	0.8566	0.1635
1	702900	703011	RLOC_00000234	.	+	69.26	0.1317	0.4784	0.7006	0.1635
1	703255	703352	RLOC_00000234	.	+	129.19	-0.4334	0.008923	0.06857	0.1635
1	702596	702678	RLOC_00000234	.	+	96.17	0.2664	0.178	0.4057	0.1635
1	701874	701975	RLOC_00000234	.	+	80.25	0.2897	0.1292	0.3367	0.1635
1	701680	701774	RLOC_00000234	.	+	73.65	0.5543	0.05784	0.2107	0.1635
1	704493	704587	RLOC_00000235	.	-	181.83	-0.2753	0.002064	0.02768	0.05707
1	705640	706100	RLOC_00000235	.	-	15.03	-0.0775	0.9883	0.9973	0.05707
1	705128	705301	RLOC_00000235	.	-	175.90	0.0643	0.5694	0.7664	0.05707
1	705366	705533	RLOC_00000235	.	-	175.67	0.0405	0.7843	0.8963	0.05707
1	704667	705063	RLOC_00000235	.	-	208.79	0.1101	0.3728	0.6129	0.05707
1	705655	706100	RLOC_00000235	.	-	180.36	0.1445	0.3029	0.5466	0.05707
1	708188	708303	RLOC_00000236	.	+	0.15	8.3695	0.9055	nan	nan
1	708508	708600	RLOC_00000236	.	+	0.00	nan	nan	nan	nan
1	709466	709597	RLOC_00000236	.	+	0.92	-2.0235	0.9055	nan	nan
1	710332	710694	RLOC_00000237	.	-	105.93	-0.0296	0.9999	1	0.4011
1	711407	711504	RLOC_00000237	.	-	74.17	0.4059	0.03529	0.1569	0.4011
1	710800	710954	RLOC_00000237	.	-	73.13	0.0332	0.8333	0.9222	0.4011
1	711183	711262	RLOC_00000237	.	-	81.62	0.0590	0.6378	0.8113	0.4011
1	711015	711091	RLOC_00000237	.	-	63.32	-0.1958	0.5326	0.7405	0.4011
1	710135	710240	RLOC_00000237	.	-	100.57	-0.3229	0.1536	0.3727	0.4011
1	714205	714316	RLOC_00000238	.	-	57.74	0.0751	0.9339	0.9709	0.04513
1	714462	714557	RLOC_00000238	.	-	50.62	-0.1974	0.8604	0.9356	0.04513
1	725607	725688	RLOC_00000238	.	-	16.85	0.9477	0.001497	0.02263	0.04513
1	724388	724680	RLOC_00000238	.	-	17.77	-0.4657	0.713	0.8565	0.04513
1	725823	726036	RLOC_00000238	.	-	16.79	0.2654	0.3717	0.6119	0.04513
1	714863	715006	RLOC_00000238	.	-	69.37	-0.5857	0.04466	0.1806	0.04513
1	720584	720680	RLOC_00000238	.	-	37.58	-0.0620	0.5882	0.7791	0.04513
1	725080	725235	RLOC_00000238	.	-	14.71	0.1151	0.1823	0.4116	0.04513
1	726343	726709	RLOC_00000238	.	-	12.90	0.8368	0.009273	0.07014	0.04513
1	724745	724889	RLOC_00000238	.	-	18.38	-0.1979	0.4997	0.7164	0.04513
1	725408	725551	RLOC_00000238	.	-	16.51	0.8723	0.004467	0.04462	0.04513
1	722006	722115	RLOC_00000238	.	-	23.45	-0.2052	0.7823	0.8955	0.04513
1	718414	718502	RLOC_00000238	.	-	6.15	1.6668	0.06316	0.2219	0.04513
1	726346	726709	RLOC_00000238	.	-	0.00	nan	nan	nan	0.04513
1	718661	718934	RLOC_00000238	.	-	24.97	0.5940	0.05102	0.1954	0.04513
1	721794	721904	RLOC_00000238	.	-	31.10	-0.0265	0.7324	0.8676	0.04513
1	722814	722965	RLOC_00000238	.	-	22.03	0.5341	0.12	0.3224	0.04513
1	715314	715659	RLOC_00000238	.	-	66.98	-0.6640	0.005225	0.04931	0.04513
1	724118	724274	RLOC_00000238	.	-	25.82	0.2106	0.07723	0.2493	0.04513
1	726121	726274	RLOC_00000238	.	-	14.89	0.0385	0.5241	0.7342	0.04513
1	730609	730915	RLOC_00000239	.	+	17.75	0.1623	0.3989	0.6358	0.9947
1	730022	730139	RLOC_00000239	.	+	8.67	0.3520	0.3664	0.6071	0.9947
1	730414	730496	RLOC_00000239	.	+	19.49	-0.1571	0.9311	0.9696	0.9947
1	731072	731175	RLOC_00000239	.	+	21.64	-0.6932	0.4605	0.6869	0.9947
1	730055	730139	RLOC_00000239	.	+	2.97	0.5032	0.6756	0.8338	0.9947
1	737080	737232	RLOC_00000240	.	-	79.13	0.2000	0.04624	0.1844	0.2551
1	732740	732927	RLOC_00000240	.	-	163.67	-0.8086	0.01729	0.1018	0.2551
1	737623	737873	RLOC_00000240	.	-	53.65	0.1151	0.1051	0.2982	0.2551
1	737419	737561	RLOC_00000240	.	-	11.20	-0.0535	0.197	0.4303	0.2551
1	737436	737561	RLOC_00000240	.	-	30.25	0.5514	0.02091	0.1143	0.2551
1	741206	741508	RLOC_00000241	.	+	188.55	0.3757	0.009577	0.07152	0.0001133
1	741064	741147	RLOC_00000241	.	+	291.87	0.1431	0.1029	0.2948	0.0001133
1	741794	741945	RLOC_00000241	.	+	454.25	-0.0043	0.7745	0.8912	0.0001133
1	742735	742821	RLOC_00000241	.	+	357.98	0.0328	0.3601	0.6015	0.0001133
1	743715	743814	RLOC_00000241	.	+	500.39	-0.5647	0.06921	0.2341	0.0001133
1	740049	740123	RLOC_00000241	.	+	176.19	0.3227	0.01645	0.09878	0.0001133
1	740244	740354	RLOC_00000241	.	+	208.10	0.5050	0.000599	0.01242	0.0001133
1	742316	742501	RLOC_00000241	.	+	582.48	-0.0561	0.8533	0.9323	0.0001133
1	743545	743619	RLOC_00000241	.	+	562.95	-0.4967	0.002594	0.03191	0.0001133
1	740756	740969	RLOC_00000241	.	+	410.76	0.0888	0.1839	0.4134	0.0001133
1	741600	741683	RLOC_00000241	.	+	253.27	0.4140	0.01961	0.1097	0.0001133
1	741064	741508	RLOC_00000241	.	+	4.26	4.3681	2.372e-05	0.001441	0.0001133
1	740501	740619	RLOC_00000241	.	+	173.36	0.7466	4.279e-07	6.783e-05	0.0001133
1	742981	743089	RLOC_00000241	.	+	547.13	-0.2940	0.003505	0.03848	0.0001133
1	743202	743300	RLOC_00000241	.	+	499.02	-0.3487	0.0009801	0.01721	0.0001133
1	742049	742180	RLOC_00000241	.	+	361.32	0.1469	0.1427	0.3571	0.0001133
1	742316	742501	RLOC_00000242	.	-	6.28	-0.1509	0.3299	0.5737	0.9818
1	739940	753614	RLOC_00000242	.	-	0.13	10.2614	0.9508	nan	0.9818
1	736019	746540	RLOC_00000242	.	-	0.07	9.5189	0.9683	nan	0.9818
1	738878	753840	RLOC_00000242	.	-	0.10	10.1924	1	nan	0.9818
1	746230	746304	RLOC_00000243	.	-	1.09	nan	nan	nan	nan
1	747725	747857	RLOC_00000244	.	+	0.07	-0.5641	0.9712	nan	nan
1	747530	747621	RLOC_00000244	.	+	0.14	0.4216	0.9712	nan	nan
1	744534	753797	RLOC_00000245	.	-	0.07	-17.0063	0.6814	nan	nan
1	744805	753917	RLOC_00000245	.	-	0.06	-16.7949	0.7126	nan	nan
1	746640	753917	RLOC_00000245	.	-	0.06	-16.7949	0.7126	nan	nan
1	739940	753614	RLOC_00000245	.	-	0.13	8.2715	0.9346	nan	nan
1	748096	753411	RLOC_00000245	.	-	0.07	7.4732	0.9346	nan	nan
1	748357	748564	RLOC_00000245	.	-	0.12	8.2738	0.9639	nan	nan
1	738878	753840	RLOC_00000245	.	-	0.10	8.1175	0.9573	nan	nan
1	748094	753420	RLOC_00000245	.	-	0.10	8.1175	0.9573	nan	nan
1	750297	750415	RLOC_00000246	.	+	35.54	0.5922	0.04057	0.1707	0.4345
1	751356	751427	RLOC_00000246	.	+	55.40	-0.1381	0.9029	0.9565	0.4345
1	750626	750795	RLOC_00000246	.	+	50.37	0.0510	0.8116	0.9107	0.4345
1	750873	750956	RLOC_00000246	.	+	38.04	-0.1842	0.451	0.6792	0.4345
1	751222	751296	RLOC_00000246	.	+	53.54	-0.2367	0.5564	0.7575	0.4345
1	750471	750556	RLOC_00000246	.	+	46.26	0.0693	0.6664	0.8286	0.4345
1	749494	749784	RLOC_00000246	.	+	60.65	0.0452	0.6905	0.8434	0.4345
1	749948	750117	RLOC_00000246	.	+	61.41	-0.1967	0.8847	0.9477	0.4345
1	751015	751119	RLOC_00000246	.	+	46.83	-0.0409	0.9631	0.985	0.4345
1	752659	752981	RLOC_00000247	.	+	10.13	nan	nan	nan	nan
1	752711	752981	RLOC_00000247	.	+	0.00	nan	nan	nan	nan
1	754889	755380	RLOC_00000248	.	-	397.54	nan	nan	nan	nan
1	758005	758198	RLOC_00000249	.	+	202.34	-0.1977	0.44	0.67	0.8502
1	757685	757936	RLOC_00000249	.	+	263.73	0.0409	0.6863	0.8405	0.8502
1	756734	757553	RLOC_00000249	.	+	207.84	0.1904	0.263	0.5056	0.8502
1	756537	756644	RLOC_00000249	.	+	259.07	0.2862	0.2709	0.5139	0.8502
1	758258	758349	RLOC_00000249	.	+	295.93	-0.2981	0.1749	0.4016	0.8502
1	753824	763377	RLOC_00000250	.	-	0.06	-19.7649	0.5824	nan	nan
1	754816	766881	RLOC_00000250	.	-	0.08	2.7015	0.8193	nan	nan
1	754817	772773	RLOC_00000250	.	-	0.08	2.7015	0.8193	nan	nan
1	753589	769725	RLOC_00000250	.	-	0.06	2.3709	0.8191	nan	nan
1	753761	763735	RLOC_00000250	.	-	0.06	2.3709	0.8191	nan	nan
1	754129	766303	RLOC_00000250	.	-	0.06	2.3709	0.8191	nan	nan
1	753918	762563	RLOC_00000250	.	-	0.02	1.4300	0.8193	nan	nan
1	753918	766166	RLOC_00000250	.	-	0.02	1.4300	0.8193	nan	nan
1	753678	766894	RLOC_00000250	.	-	0.13	3.3323	0.8338	nan	nan
1	764596	764698	RLOC_00000251	.	+	149.16	0.2199	0.09126	0.2748	0.03943
1	764065	764156	RLOC_00000251	.	+	125.42	0.0904	0.5026	0.7184	0.03943
1	763429	763979	RLOC_00000251	.	+	131.19	-0.1010	0.9927	0.9996	0.03943
1	765254	765484	RLOC_00000251	.	+	231.50	-0.4190	0.01192	0.08132	0.03943
1	764930	765024	RLOC_00000251	.	+	0.02	7.9374	0.954	nan	0.03943
1	765599	765752	RLOC_00000251	.	+	312.33	-0.6409	0.001249	0.02013	0.03943
1	762627	763012	RLOC_00000251	.	+	13.33	1.5879	0.003981	0.0415	0.03943
1	762577	763012	RLOC_00000251	.	+	75.53	0.4471	0.05658	0.2082	0.03943
1	763429	764156	RLOC_00000251	.	+	0.46	-0.6086	0.9437	nan	0.03943
1	766379	767141	RLOC_00000251	.	+	0.96	1.1383	0.3538	nan	0.03943
1	764865	765024	RLOC_00000251	.	+	200.70	-0.1139	0.9004	0.9554	0.03943
1	761809	761885	RLOC_00000251	.	+	138.82	0.5089	0.01451	0.09174	0.03943
1	762390	762509	RLOC_00000251	.	+	94.64	0.3762	0.03626	0.1597	0.03943
1	764830	765024	RLOC_00000251	.	+	10.70	-0.5215	0.4262	0.6586	0.03943
1	763209	763298	RLOC_00000251	.	+	111.83	0.3913	0.01934	0.1089	0.03943
1	767150	767296	RLOC_00000252	.	-	0.00	nan	nan	nan	nan
1	768129	773489	RLOC_00000253	.	+	0.08	0.1568	1	nan	nan
1	768129	776868	RLOC_00000253	.	+	0.06	-0.1738	1	nan	nan
1	774699	774784	RLOC_00000254	.	+	22.49	0.5383	0.08014	0.2547	0.3992
1	774152	774223	RLOC_00000254	.	+	1.72	1.7515	0.2576	nan	0.3992
1	773690	774095	RLOC_00000254	.	+	12.99	-0.1427	0.5215	0.7324	0.3992
1	774152	774230	RLOC_00000254	.	+	12.47	-0.2564	0.6543	0.821	0.3992
1	774878	774967	RLOC_00000254	.	+	25.61	-0.1170	0.7954	0.9022	0.3992
1	774538	774651	RLOC_00000254	.	+	24.98	0.4222	0.3682	0.6088	0.3992
1	775046	775121	RLOC_00000254	.	+	25.05	-0.8509	0.03501	0.1562	0.3992
1	773413	773498	RLOC_00000254	.	+	0.54	11.9334	0.7962	nan	0.3992
1	774152	774246	RLOC_00000254	.	+	0.06	9.1157	0.8832	nan	0.3992
1	778064	778152	RLOC_00000255	.	+	20.28	-0.3223	0.3814	0.6206	0.1778
1	778609	778806	RLOC_00000255	.	+	31.67	-0.3000	0.6508	0.8189	0.1778
1	777236	777335	RLOC_00000255	.	+	37.13	-0.0084	0.5582	0.7586	0.1778
1	776354	776481	RLOC_00000255	.	+	31.14	0.9922	0.01009	0.07366	0.1778
1	778332	778485	RLOC_00000255	.	+	31.98	0.0185	0.7248	0.8633	0.1778
1	779249	779537	RLOC_00000255	.	+	58.79	-0.3722	0.2739	0.5169	0.1778
1	776761	777154	RLOC_00000255	.	+	21.94	0.4796	0.1939	0.4267	0.1778
1	779645	779743	RLOC_00000255	.	+	83.12	-0.6677	0.02623	0.1314	0.1778
1	778895	779001	RLOC_00000255	.	+	44.74	0.0266	0.5258	0.7355	0.1778
1	777738	777871	RLOC_00000255	.	+	32.16	0.7076	0.03684	0.1614	0.1778
1	779079	779173	RLOC_00000255	.	+	41.83	0.0441	0.7543	0.88	0.1778
1	775648	775807	RLOC_00000255	.	+	22.34	0.3577	0.3778	0.6174	0.1778
1	783174	783317	RLOC_00000257	.	+	40.51	-0.0125	0.7907	0.8998	0.0001127
1	783841	783942	RLOC_00000257	.	+	82.21	-0.5625	0.00139	0.02156	0.0001127
1	783595	783680	RLOC_00000257	.	+	61.62	0.2309	0.9373	0.9723	0.0001127
1	781176	782925	RLOC_00000257	.	+	10.87	0.5752	0.5315	0.7397	0.0001127
1	784025	784132	RLOC_00000257	.	+	75.67	-0.5634	9.582e-05	0.003724	0.0001127
1	780835	781080	RLOC_00000257	.	+	94.24	1.4705	4.248e-07	6.743e-05	0.0001127
1	787313	790248	RLOC_00000258	.	+	1.15	-0.5211	0.5954	nan	nan
1	787386	790228	RLOC_00000258	.	+	0.55	-2.1086	0.849	nan	nan
1	788430	791353	RLOC_00000258	.	+	0.58	0.2429	0.8024	nan	nan
1	787327	790259	RLOC_00000258	.	+	0.76	2.6753	0.3129	nan	nan
1	787514	787588	RLOC_00000258	.	+	0.77	-15.1044	1	nan	nan
1	788246	791128	RLOC_00000258	.	+	0.27	-13.7304	1	nan	nan
1	787907	788148	RLOC_00000258	.	+	0.08	0.1816	0.8378	nan	nan
1	788336	791310	RLOC_00000258	.	+	0.94	-15.2735	1	nan	nan
1	787290	790228	RLOC_00000258	.	+	0.31	-0.4803	0.7717	nan	nan
1	787291	798245	RLOC_00000258	.	+	0.26	-13.3679	1	nan	nan
1	788061	790961	RLOC_00000258	.	+	0.14	14.6006	0.7565	nan	nan
1	788381	791353	RLOC_00000258	.	+	0.19	15.2565	0.3836	nan	nan
1	787327	790298	RLOC_00000258	.	+	0.02	12.5881	0.7914	nan	nan
1	787298	790269	RLOC_00000258	.	+	0.02	12.5881	0.7914	nan	nan
1	787389	790275	RLOC_00000258	.	+	0.07	14.0631	0.6592	nan	nan
1	787463	790226	RLOC_00000258	.	+	0.02	12.5881	0.7914	nan	nan
1	788186	791157	RLOC_00000258	.	+	0.02	12.5881	0.7914	nan	nan
1	788331	791305	RLOC_00000258	.	+	0.10	14.4505	0.6205	nan	nan
1	788031	790964	RLOC_00000258	.	+	0.13	14.2094	0.7841	nan	nan
1	787313	790248	RLOC_00000259	.	+	1.15	-0.4628	0.4279	nan	nan
1	787386	790228	RLOC_00000259	.	+	0.55	-2.0487	0.6469	nan	nan
1	788430	791353	RLOC_00000259	.	+	0.58	0.2963	0.9584	nan	nan
1	787327	790259	RLOC_00000259	.	+	0.76	2.6881	0.4938	nan	nan
1	788246	791128	RLOC_00000259	.	+	0.27	-13.7664	0.8609	nan	nan
1	788336	791310	RLOC_00000259	.	+	0.94	-15.3055	0.8319	nan	nan
1	787290	790228	RLOC_00000259	.	+	0.31	-0.4156	0.9252	nan	nan
1	787291	798245	RLOC_00000259	.	+	0.26	-13.3997	0.9033	nan	nan
1	788061	790961	RLOC_00000259	.	+	0.14	14.7595	0.7852	nan	nan
1	791488	792710	RLOC_00000259	.	+	0.14	14.7595	0.7852	nan	nan
1	788381	791353	RLOC_00000259	.	+	0.19	15.4108	0.484	nan	nan
1	787327	790298	RLOC_00000259	.	+	0.02	12.7425	0.8635	nan	nan
1	787298	790269	RLOC_00000259	.	+	0.02	12.7425	0.8635	nan	nan
1	787389	790275	RLOC_00000259	.	+	0.07	14.2168	0.7527	nan	nan
1	787463	790226	RLOC_00000259	.	+	0.02	12.7425	0.8635	nan	nan
1	788186	791157	RLOC_00000259	.	+	0.02	12.7425	0.8635	nan	nan
1	788331	791305	RLOC_00000259	.	+	0.10	14.6044	0.7192	nan	nan
1	788031	790964	RLOC_00000259	.	+	0.13	14.3645	0.88	nan	nan
1	792460	792753	RLOC_00000260	.	-	0.81	nan	nan	nan	nan
1	796017	796535	RLOC_00000261	.	-	60.81	-0.1234	0.6669	0.8288	0.1895
1	794968	795101	RLOC_00000261	.	-	159.25	-0.0747	0.4576	0.6843	0.1895
1	793929	794021	RLOC_00000261	.	-	190.74	-0.1247	0.5723	0.7684	0.1895
1	797126	797312	RLOC_00000261	.	-	63.72	0.0875	0.5745	0.7699	0.1895
1	794197	794327	RLOC_00000261	.	-	2.47	0.8973	0.4133	0.6482	0.1895
1	796891	797040	RLOC_00000261	.	-	71.19	0.0548	0.712	0.8558	0.1895
1	794409	794541	RLOC_00000261	.	-	162.50	0.2126	0.1358	0.3466	0.1895
1	794179	794327	RLOC_00000261	.	-	145.25	0.0595	0.9334	0.9706	0.1895
1	796627	796775	RLOC_00000261	.	-	42.97	-0.5164	0.06693	0.2297	0.1895
1	797410	797545	RLOC_00000261	.	-	55.18	0.0026	0.9175	0.9631	0.1895
1	797599	797727	RLOC_00000261	.	-	58.13	0.3351	0.1638	0.3867	0.1895
1	795855	795987	RLOC_00000261	.	-	87.34	-0.2053	0.4322	0.6639	0.1895
1	793730	793828	RLOC_00000261	.	-	253.41	0.1771	0.1084	0.3035	0.1895
1	797788	798000	RLOC_00000261	.	-	45.90	0.4467	0.1031	0.2951	0.1895
1	794649	794898	RLOC_00000261	.	-	211.22	-0.2578	0.01111	0.07788	0.1895
1	800699	800971	RLOC_00000262	.	+	14.93	0.5145	0.1819	0.4111	0.1275
1	801888	802011	RLOC_00000262	.	+	12.01	-1.2671	0.06221	0.22	0.1275
1	799430	799640	RLOC_00000262	.	+	7.40	0.4789	0.4009	0.6375	0.1275
1	800111	800381	RLOC_00000262	.	+	15.81	0.2132	0.2339	0.4737	0.1275
1	800464	800628	RLOC_00000262	.	+	12.90	0.6990	0.05435	0.2031	0.1275
1	799909	799998	RLOC_00000262	.	+	8.04	0.4482	0.2602	0.5029	0.1275
1	799716	799826	RLOC_00000262	.	+	7.84	-0.0863	0.9098	0.9598	0.1275
1	801038	801184	RLOC_00000262	.	+	14.83	-0.0196	0.9481	0.9774	0.1275
1	802057	802162	RLOC_00000262	.	+	15.02	-1.1513	0.006324	0.05541	0.1275
1	801271	801355	RLOC_00000262	.	+	15.03	0.2272	0.4396	0.6696	0.1275
1	801428	801516	RLOC_00000262	.	+	13.16	0.3912	0.4548	0.6823	0.1275
1	802222	802319	RLOC_00000262	.	+	15.78	-0.6201	0.092	0.2761	0.1275
1	803116	803542	RLOC_00000263	.	+	2.61	3.4631	0.00641	0.05584	0.00338
1	803116	803564	RLOC_00000263	.	+	101.38	0.4066	0.03284	0.1503	0.00338
1	803281	803564	RLOC_00000263	.	+	0.48	-0.5484	0.802	nan	0.00338
1	803686	803834	RLOC_00000263	.	+	201.99	0.0612	0.2435	0.4845	0.00338
1	804366	804738	RLOC_00000263	.	+	218.92	0.2643	0.02321	0.1219	0.00338
1	803956	804246	RLOC_00000263	.	+	114.03	0.2231	0.1533	0.3724	0.00338
1	805651	805859	RLOC_00000263	.	+	206.70	-0.2069	0.368	0.6087	0.00338
1	804851	804960	RLOC_00000263	.	+	218.31	0.1528	0.1412	0.3551	0.00338
1	806086	806195	RLOC_00000263	.	+	316.44	-0.1486	0.5866	0.7782	0.00338
1	806408	806660	RLOC_00000263	.	+	396.72	-0.8833	4.133e-05	0.002113	0.00338
1	805069	805166	RLOC_00000263	.	+	120.52	0.2543	0.04785	0.1879	0.00338
1	805349	805457	RLOC_00000263	.	+	186.99	0.1079	0.2628	0.5054	0.00338
1	803116	803200	RLOC_00000263	.	+	1.49	0.4117	0.3957	nan	0.00338
1	810089	810187	RLOC_00000264	.	+	201.76	-0.2299	0.2679	0.5109	0.08866
1	809213	809408	RLOC_00000264	.	+	125.33	-0.0791	0.7237	0.8627	0.08866
1	809581	809671	RLOC_00000264	.	+	226.03	-0.1118	0.5064	0.721	0.08866
1	808393	808531	RLOC_00000264	.	+	119.80	0.2990	0.1405	0.3539	0.08866
1	809787	809910	RLOC_00000264	.	+	247.63	-0.0981	0.8198	0.9149	0.08866
1	807509	807950	RLOC_00000264	.	+	47.75	0.8333	0.003816	0.04046	0.08866
1	808821	808912	RLOC_00000264	.	+	0.58	-0.4493	0.8968	nan	0.08866
1	808821	808978	RLOC_00000264	.	+	3.89	1.4878	0.1129	0.3108	0.08866
1	810233	810379	RLOC_00000264	.	+	248.38	-0.3288	0.06292	0.2214	0.08866
1	807509	807591	RLOC_00000264	.	+	5.25	-0.9300	0.7486	0.877	0.08866
1	807630	807950	RLOC_00000264	.	+	46.40	0.2299	0.2745	0.5176	0.08866
1	808016	808228	RLOC_00000264	.	+	116.42	0.4561	0.01239	0.08329	0.08866
1	811987	812029	RLOC_00000265	.	-	0.00	nan	nan	nan	nan
1	813580	813928	RLOC_00000266	.	+	51.49	-0.1550	0.703	0.8506	1
1	813603	813928	RLOC_00000266	.	+	84.40	0.1215	0.6534	0.8202	1
1	817095	817174	RLOC_00000267	.	+	0.52	nan	nan	nan	nan
1	812832	818942	RLOC_00000268	.	-	0.27	nan	nan	nan	nan
1	818279	818919	RLOC_00000269	.	-	413.21	0.0418	0.427	0.6594	1
1	819077	819294	RLOC_00000269	.	-	558.50	-0.0363	0.4173	0.6516	1
1	820076	820158	RLOC_00000270	.	+	22.59	-0.0644	0.8707	0.9407	1
1	819782	819896	RLOC_00000270	.	+	16.09	-0.1771	0.4059	0.6416	1
1	820500	820594	RLOC_00000270	.	+	22.59	0.1985	0.5921	0.7817	1
1	820665	820737	RLOC_00000270	.	+	22.89	-0.0246	0.64	0.8127	1
1	818279	818919	RLOC_00000271	.	-	0.16	0.0000	1	nan	nan
1	818956	828944	RLOC_00000271	.	-	0.16	-0.0000	1	nan	nan
1	825654	825744	RLOC_00000272	.	+	70.92	-0.1243	0.55	0.7531	0.6955
1	824991	825101	RLOC_00000272	.	+	61.04	0.1630	0.467	0.6916	0.6955
1	824812	824890	RLOC_00000272	.	+	64.59	0.0005	0.7486	0.877	0.6955
1	825146	825252	RLOC_00000272	.	+	50.91	0.4063	0.101	0.2918	0.6955
1	825486	825586	RLOC_00000272	.	+	67.33	-0.2836	0.1015	0.2926	0.6955
1	825341	825421	RLOC_00000272	.	+	52.17	0.0598	0.5735	0.7692	0.6955
1	826736	827178	RLOC_00000273	.	+	55.14	0.8892	0.002117	0.02812	0.05811
1	826736	829720	RLOC_00000273	.	+	6.30	-1.9285	0.2099	0.4459	0.05811
1	829181	829720	RLOC_00000273	.	+	129.04	-0.3983	0.01491	0.09331	0.05811
1	833569	833693	RLOC_00000274	.	+	30.24	-0.6874	0.3869	0.6252	0.1965
1	832934	833083	RLOC_00000274	.	+	42.47	0.1735	0.2552	0.4972	0.1965
1	834418	834513	RLOC_00000274	.	+	71.22	-0.7156	0.01172	0.08051	0.1965
1	831312	831419	RLOC_00000274	.	+	18.40	0.5231	0.05994	0.2152	0.1965
1	833955	834253	RLOC_00000274	.	+	30.36	0.2162	0.3096	0.5534	0.1965
1	832639	832752	RLOC_00000274	.	+	36.98	0.1322	0.367	0.6078	0.1965
1	833366	833453	RLOC_00000274	.	+	48.43	0.2981	0.04399	0.1792	0.1965
1	838313	838399	RLOC_00000275	.	+	166.21	0.1157	0.2297	0.469	0.006633
1	840410	840507	RLOC_00000275	.	+	279.52	-0.7463	0.0001073	0.004011	0.006633
1	841745	841999	RLOC_00000275	.	+	0.00	nan	nan	nan	0.006633
1	839226	839311	RLOC_00000275	.	+	189.67	0.0453	0.4218	0.6552	0.006633
1	837907	838068	RLOC_00000275	.	+	170.24	0.1284	0.1621	0.3843	0.006633
1	836327	836768	RLOC_00000275	.	+	81.21	0.6686	0.004066	0.04209	0.006633
1	837232	837470	RLOC_00000275	.	+	143.69	0.4758	0.01068	0.07616	0.006633
1	839468	839677	RLOC_00000275	.	+	204.09	0.0778	0.45	0.6784	0.006633
1	839804	839919	RLOC_00000275	.	+	189.01	-0.2939	0.09079	0.2739	0.006633
1	843145	843230	RLOC_00000277	.	-	208.15	0.1221	0.1192	0.3211	0.7454
1	843551	843676	RLOC_00000277	.	-	172.33	-0.1323	0.1266	0.3329	0.7454
1	845434	845951	RLOC_00000278	.	-	60.00	-0.4448	0.03548	0.1575	0.4025
1	845032	845113	RLOC_00000278	.	-	48.40	0.1844	0.3562	0.5978	0.4025
1	846476	846729	RLOC_00000278	.	-	39.42	0.4288	0.1131	0.3112	0.4025
1	848496	848641	RLOC_00000279	.	+	143.97	0.1702	0.4039	0.64	0.1546
1	849069	849178	RLOC_00000279	.	+	230.45	-0.3297	0.1346	0.3449	0.1546
1	848878	848997	RLOC_00000279	.	+	221.71	-0.2673	0.02462	0.1263	0.1546
1	848226	848366	RLOC_00000279	.	+	114.04	0.3837	0.008236	0.06525	0.1546
1	848712	848807	RLOC_00000279	.	+	188.49	0.1934	0.1198	0.3221	0.1546
1	853877	854592	RLOC_00000280	.	+	0.63	-1.2182	0.9632	nan	nan
1	854722	854827	RLOC_00000280	.	+	0.06	4.9463	0.8843	nan	nan
1	853877	856254	RLOC_00000280	.	+	0.05	4.8639	0.991	nan	nan
1	857092	857278	RLOC_00000281	.	-	0.12	13.2321	0.5938	nan	0.3283
1	858039	858119	RLOC_00000281	.	-	0.11	-11.0059	0.8917	nan	0.3283
1	856650	856758	RLOC_00000281	.	-	0.16	-11.3506	0.8843	nan	0.3283
1	858692	858776	RLOC_00000281	.	-	0.53	-1.1371	0.5594	nan	0.3283
1	855329	855404	RLOC_00000281	.	-	2.41	1.1235	0.1152	0.3146	0.3283
1	854705	854802	RLOC_00000281	.	-	2.02	-3.4571	0.8382	0.9248	0.3283
1	858849	859000	RLOC_00000281	.	-	0.37	0.4416	0.4835	nan	0.3283
1	856293	856369	RLOC_00000281	.	-	1.39	-1.8979	0.8981	nan	0.3283
1	859291	859397	RLOC_00000281	.	-	0.02	11.3046	0.744	nan	0.3283
1	855600	855687	RLOC_00000281	.	-	1.52	-0.6542	0.762	nan	0.3283
1	857798	857970	RLOC_00000281	.	-	0.11	-11.0059	0.8917	nan	0.3283
1	855165	855254	RLOC_00000281	.	-	2.20	1.6644	0.02547	0.129	0.3283
1	858215	858598	RLOC_00000281	.	-	0.00	nan	nan	nan	0.3283
1	854932	855030	RLOC_00000281	.	-	2.59	-2.2939	0.48	0.7019	0.3283
1	856839	857012	RLOC_00000281	.	-	0.12	13.2370	0.5938	nan	0.3283
1	859078	859231	RLOC_00000281	.	-	0.02	11.3046	0.744	nan	0.3283
1	856443	856539	RLOC_00000281	.	-	0.62	-13.1463	1	nan	0.3283
1	855942	856055	RLOC_00000281	.	-	0.44	-0.2507	0.6001	nan	0.3283
1	857436	857546	RLOC_00000281	.	-	1.30	3.3263	0.2014	nan	0.3283
1	855785	855858	RLOC_00000281	.	-	0.19	13.9188	0.3451	nan	0.3283
1	857627	857703	RLOC_00000281	.	-	0.51	0.7850	0.7837	nan	0.3283
1	861908	862041	RLOC_00000282	.	-	27.55	0.0793	0.9218	0.9653	0.1736
1	862211	862313	RLOC_00000282	.	-	42.80	0.1081	0.6677	0.8292	0.1736
1	862612	862752	RLOC_00000282	.	-	23.10	0.6569	0.1212	0.3243	0.1736
1	863540	863859	RLOC_00000282	.	-	28.10	0.3011	0.2148	0.4516	0.1736
1	862803	863458	RLOC_00000282	.	-	27.76	0.8748	0.009741	0.0722	0.1736
1	861277	861367	RLOC_00000282	.	-	43.32	-0.2821	0.2535	0.4955	0.1736
1	861510	861605	RLOC_00000282	.	-	39.35	-0.7020	0.01079	0.07661	0.1736
1	862639	862752	RLOC_00000282	.	-	13.89	-0.2303	0.6829	0.8383	0.1736
1	862392	862487	RLOC_00000282	.	-	37.83	-0.2128	0.5016	0.7177	0.1736
1	867519	867625	RLOC_00000283	.	-	0.00	nan	nan	nan	0.6804
1	867510	867629	RLOC_00000283	.	-	10.08	-0.5080	0.1424	0.3568	0.6804
1	867519	867629	RLOC_00000283	.	-	3.49	-0.3226	0.7515	0.8785	0.6804
1	866940	867408	RLOC_00000283	.	-	33.81	0.3487	0.09578	0.2829	0.6804
1	870226	870312	RLOC_00000284	.	-	585.28	0.2211	0.05241	0.1986	0.06903
1	869961	870143	RLOC_00000284	.	-	588.46	0.0200	0.7429	0.8738	0.06903
1	870570	870650	RLOC_00000284	.	-	1015.55	0.0964	0.3464	0.5892	0.06903
1	869781	869874	RLOC_00000284	.	-	866.67	0.1320	0.2159	0.4529	0.06903
1	870406	870495	RLOC_00000284	.	-	597.90	-0.0205	0.8325	0.9218	0.06903
1	869551	869657	RLOC_00000284	.	-	742.29	-0.0340	0.7413	0.8729	0.06903
1	869369	869453	RLOC_00000284	.	-	1193.62	-0.3003	0.002682	0.03256	0.06903
1	872392	872444	RLOC_00000285	.	+	0.00	nan	nan	nan	nan
1	872681	872739	RLOC_00000285	.	+	0.00	nan	nan	nan	nan
1	872211	872291	RLOC_00000285	.	+	0.00	nan	nan	nan	nan
1	875449	875549	RLOC_00000287	.	-	0.68	nan	nan	nan	nan
1	876552	876620	RLOC_00000288	.	-	0.16	-16.2339	0.7067	nan	nan
1	869781	869874	RLOC_00000288	.	-	0.20	6.6456	0.8955	nan	nan
1	869916	888794	RLOC_00000288	.	-	0.07	5.1735	0.9969	nan	nan
1	869913	888792	RLOC_00000288	.	-	0.13	5.9681	0.9969	nan	nan
1	878455	878539	RLOC_00000290	.	-	64.09	-0.0731	0.6951	0.846	1
1	878809	878910	RLOC_00000290	.	-	90.23	0.0284	0.8515	0.9313	1
1	879299	879931	RLOC_00000290	.	-	2.43	-1.8169	0.5436	0.7487	1
1	878654	878734	RLOC_00000290	.	-	85.92	0.0471	0.584	0.7764	1
1	881875	881977	RLOC_00000291	.	-	52.07	-0.0700	0.6876	0.8414	1
1	882054	882249	RLOC_00000291	.	-	50.13	0.0721	0.6925	0.8445	1
1	886607	886702	RLOC_00000292	.	+	11.88	0.0924	0.9039	0.9569	1
1	887157	887807	RLOC_00000292	.	+	0.00	nan	nan	nan	1
1	886862	886991	RLOC_00000292	.	+	11.71	-0.0936	0.9035	0.9568	1
1	885936	886034	RLOC_00000293	.	-	157.38	-0.4446	0.116	0.316	0.7377
1	887136	887224	RLOC_00000293	.	-	143.93	0.0936	0.6772	0.8347	0.7377
1	887429	887530	RLOC_00000293	.	-	143.57	0.1856	0.314	0.5579	0.7377
1	886939	887014	RLOC_00000293	.	-	126.97	0.2692	0.2843	0.5277	0.7377
1	886598	886695	RLOC_00000293	.	-	138.08	-0.0702	0.9583	0.9827	0.7377
1	887634	887724	RLOC_00000293	.	-	133.33	0.2456	0.1613	0.3833	0.7377
1	889523	889768	RLOC_00000293	.	-	23.42	0.0521	0.7668	0.887	0.7377
1	886099	886195	RLOC_00000293	.	-	119.33	-0.2291	0.2639	0.5066	0.7377
1	886243	886392	RLOC_00000293	.	-	103.19	-0.0727	0.9021	0.9562	0.7377
1	887257	887367	RLOC_00000293	.	-	150.26	0.0817	0.6175	0.7984	0.7377
1	886459	886553	RLOC_00000293	.	-	107.66	-0.1583	0.4479	0.6768	0.7377
1	886788	886877	RLOC_00000293	.	-	145.43	0.1085	0.3763	0.616	0.7377
1	879042	891123	RLOC_00000294	.	-	1.40	-7.4602	1	nan	nan
1	879898	899318	RLOC_00000294	.	-	0.11	-3.9252	0.989	nan	nan
1	882987	896160	RLOC_00000294	.	-	0.13	-3.9462	0.9437	nan	nan
1	886788	886877	RLOC_00000294	.	-	0.06	20.0116	0.7048	nan	nan
1	886910	904709	RLOC_00000294	.	-	0.06	20.0116	0.7048	nan	nan
1	879284	899248	RLOC_00000295	.	+	0.10	-12.1884	0.7847	nan	nan
1	879898	899318	RLOC_00000295	.	+	0.06	-11.5908	0.828	nan	nan
1	885478	893637	RLOC_00000295	.	+	0.06	-11.5908	0.828	nan	nan
1	891072	898945	RLOC_00000295	.	+	0.08	11.2180	0.9346	nan	nan
1	884056	898956	RLOC_00000295	.	+	0.06	10.8874	0.9346	nan	nan
1	884830	899422	RLOC_00000295	.	+	0.02	9.9466	0.9585	nan	nan
1	887416	899426	RLOC_00000295	.	+	0.02	9.9466	0.9585	nan	nan
1	892952	893042	RLOC_00000296	.	+	6.43	0.6205	0.08127	0.2567	0.6322
1	893205	893284	RLOC_00000296	.	+	20.06	-0.0835	0.9179	0.9632	0.6322
1	893489	893568	RLOC_00000296	.	+	32.70	-0.2419	0.4837	0.7044	0.6322
1	894943	895029	RLOC_00000297	.	-	148.08	-0.5385	0.01758	0.1028	0.258
1	895252	895354	RLOC_00000297	.	-	175.50	-0.2947	0.2397	0.4805	0.258
1	895471	895582	RLOC_00000297	.	-	157.41	0.1958	0.03215	0.1484	0.258
1	896481	897355	RLOC_00000297	.	-	71.72	0.3306	0.06402	0.2237	0.258
1	896481	897221	RLOC_00000297	.	-	4.63	0.2646	0.6198	0.7998	0.258
1	895920	896014	RLOC_00000297	.	-	122.40	0.2296	0.1098	0.3057	0.258
1	897663	908946	RLOC_00000298	.	+	0.15	-13.1022	0.9315	nan	nan
1	909009	909089	RLOC_00000298	.	+	0.46	-14.5253	1	nan	nan
1	897666	901556	RLOC_00000298	.	+	0.08	-12.1698	0.8261	nan	nan
1	899015	915779	RLOC_00000298	.	+	0.16	-13.1568	0.8345	nan	nan
1	899083	899331	RLOC_00000298	.	+	0.16	-13.1568	0.8345	nan	nan
1	899559	904747	RLOC_00000298	.	+	0.15	2.3647	0.6086	nan	nan
1	879284	899248	RLOC_00000298	.	+	0.10	-12.3874	0.8088	nan	nan
1	899475	899544	RLOC_00000298	.	+	0.10	-12.3874	0.8088	nan	nan
1	893158	902582	RLOC_00000298	.	+	0.07	-12.0344	0.8281	nan	nan
1	896286	898956	RLOC_00000298	.	+	0.07	-12.0344	0.8281	nan	nan
1	899447	914294	RLOC_00000298	.	+	0.41	-14.5624	0.8698	nan	nan
1	879898	899318	RLOC_00000298	.	+	0.06	-11.8246	0.8388	nan	nan
1	899268	899413	RLOC_00000298	.	+	0.17	-13.3476	0.8349	nan	nan
1	897662	908945	RLOC_00000298	.	+	0.16	-12.8435	0.8028	nan	nan
1	899558	908945	RLOC_00000298	.	+	0.16	-12.8435	0.8028	nan	nan
1	896986	908987	RLOC_00000298	.	+	0.13	-12.6791	0.8056	nan	nan
1	899650	903626	RLOC_00000298	.	+	0.13	-12.6791	0.8056	nan	nan
1	899650	917319	RLOC_00000298	.	+	0.13	-12.6791	0.8056	nan	nan
1	899089	899225	RLOC_00000298	.	+	0.37	18.6160	0.2941	nan	nan
1	891072	898945	RLOC_00000298	.	+	0.08	16.3497	0.653	nan	nan
1	899219	899370	RLOC_00000298	.	+	0.08	16.3497	0.653	nan	nan
1	884056	898956	RLOC_00000298	.	+	0.06	16.0413	0.6765	nan	nan
1	884830	899422	RLOC_00000298	.	+	0.02	15.0856	0.7109	nan	nan
1	887416	899426	RLOC_00000298	.	+	0.02	15.0856	0.7109	nan	nan
1	899031	899112	RLOC_00000298	.	+	0.02	15.0856	0.7109	nan	nan
1	899161	899413	RLOC_00000298	.	+	0.10	16.9252	0.5794	nan	nan
1	898788	898894	RLOC_00000299	.	-	1.96	nan	nan	nan	nan
1	901395	901485	RLOC_00000300	.	+	693.36	0.3703	0.0101	0.07366	0.1778
1	902076	902169	RLOC_00000300	.	+	972.47	-0.2217	0.01438	0.09119	0.1778
1	902346	902424	RLOC_00000300	.	+	786.94	-0.1629	0.0324	0.1491	0.1778
1	901705	901890	RLOC_00000300	.	+	741.47	0.1433	0.03225	0.1487	0.1778
1	906022	906313	RLOC_00000301	.	-	5.27	-0.5284	0.776	0.892	0.1023
1	906355	907127	RLOC_00000301	.	-	0.93	-4.0380	0.3087	nan	0.1023
1	904419	904520	RLOC_00000301	.	-	48.44	-0.5124	0.04302	0.177	0.1023
1	906022	907127	RLOC_00000301	.	-	0.86	-1.3963	0.4392	nan	0.1023
1	905382	905496	RLOC_00000301	.	-	24.97	1.1367	0.004672	0.04588	0.1023
1	904774	904880	RLOC_00000301	.	-	27.82	-0.2518	0.3073	0.5511	0.1023
1	905003	905118	RLOC_00000301	.	-	28.69	-0.0604	0.8355	0.9234	0.1023
1	905564	905666	RLOC_00000301	.	-	31.64	1.1038	0.01254	0.08398	0.1023
1	907461	907621	RLOC_00000301	.	-	3.37	-0.5843	0.729	0.8658	0.1023
1	905783	905910	RLOC_00000301	.	-	0.76	2.0349	0.6689	nan	0.1023
1	905783	905942	RLOC_00000301	.	-	11.13	0.5261	0.57	0.7669	0.1023
1	906022	906134	RLOC_00000301	.	-	4.77	1.7959	0.09725	0.2854	0.1023
1	904614	904727	RLOC_00000301	.	-	42.79	-0.3265	0.2034	0.4383	0.1023
1	906360	907127	RLOC_00000301	.	-	0.40	10.8523	0.9554	nan	0.1023
1	905172	905267	RLOC_00000301	.	-	26.02	-0.1382	0.91	0.9599	0.1023
1	908569	908654	RLOC_00000302	.	+	1291.66	-0.0980	0.8265	0.9186	0.00113
1	907754	907848	RLOC_00000302	.	+	1287.43	0.4424	5.98e-05	0.002711	0.00113
1	909009	909089	RLOC_00000302	.	+	2158.88	-0.6631	9.131e-06	0.0007126	0.00113
1	907946	908032	RLOC_00000302	.	+	1339.26	0.2438	0.001633	0.02392	0.00113
1	907946	908038	RLOC_00000302	.	+	43.89	0.3205	0.1765	0.4038	0.00113
1	911920	912082	RLOC_00000304	.	-	1.41	-1.9258	0.4873	nan	0.1867
1	913530	913653	RLOC_00000304	.	-	2.21	0.8549	0.3402	0.5834	0.1867
1	910480	910859	RLOC_00000304	.	-	45.10	-0.3452	0.05199	0.1977	0.1867
1	913235	913350	RLOC_00000304	.	-	3.01	2.6989	0.01086	0.07693	0.1867
1	911920	913165	RLOC_00000304	.	-	2.05	0.1645	0.9504	0.9786	0.1867
1	899015	915779	RLOC_00000305	.	+	0.16	-9.0645	0.9385	nan	nan
1	899447	914294	RLOC_00000305	.	+	0.41	-10.4526	0.9308	nan	nan
1	899650	917319	RLOC_00000305	.	+	0.13	-8.6886	0.9962	nan	nan
1	913235	913350	RLOC_00000305	.	+	0.27	15.7970	0.7156	nan	nan
1	911775	920343	RLOC_00000305	.	+	0.13	14.7302	0.7426	nan	nan
1	914838	914908	RLOC_00000306	.	-	0.19	-0.5536	0.975	nan	nan
1	915455	915537	RLOC_00000306	.	-	0.38	0.4251	0.975	nan	nan
1	917302	917639	RLOC_00000307	.	-	3469.50	nan	nan	nan	nan
1	919187	919266	RLOC_00000308	.	+	54.41	0.4099	0.03502	0.1562	0.3948
1	919608	919736	RLOC_00000308	.	+	43.55	-0.5620	0.0883	0.2694	0.3948
1	919816	919912	RLOC_00000308	.	+	67.01	-0.2124	0.5432	0.7484	0.3948
1	919392	919502	RLOC_00000308	.	+	56.47	0.0266	0.7716	0.8896	0.3948
1	919994	920086	RLOC_00000308	.	+	87.47	-0.3719	0.05275	0.1994	0.3948
1	918600	918867	RLOC_00000308	.	+	39.64	0.5137	0.03435	0.1544	0.3948
1	919007	919095	RLOC_00000308	.	+	50.47	0.3217	0.1948	0.4277	0.3948
1	921400	921610	RLOC_00000309	.	+	15.75	-0.3734	0.2873	0.5307	0.9594
1	921194	921298	RLOC_00000309	.	+	15.74	0.3644	0.2873	0.5307	0.9594
1	924311	924469	RLOC_00000310	.	+	0.45	0.2411	0.8061	nan	1
1	923754	923827	RLOC_00000310	.	+	4.26	-0.2045	0.4692	0.6932	1
1	923976	924092	RLOC_00000310	.	+	1.18	0.3798	0.7109	nan	1
1	925207	925278	RLOC_00000311	.	-	0.00	nan	nan	nan	nan
1	925207	925302	RLOC_00000311	.	-	0.00	nan	nan	nan	nan
1	925779	926159	RLOC_00000311	.	-	0.00	nan	nan	nan	nan
1	925445	925550	RLOC_00000311	.	-	0.00	nan	nan	nan	nan
1	918473	932345	RLOC_00000312	.	-	0.06	-17.1261	0.6446	nan	nan
1	917957	927789	RLOC_00000312	.	-	0.21	5.6440	0.9726	nan	nan
1	917958	933161	RLOC_00000312	.	-	0.08	4.4350	0.9285	nan	nan
1	917973	930590	RLOC_00000312	.	-	0.02	2.9730	0.9046	nan	nan
1	918473	932345	RLOC_00000313	.	-	0.06	-10.5180	0.7621	nan	nan
1	917958	933161	RLOC_00000313	.	-	0.08	8.9557	0.7621	nan	nan
1	935480	935569	RLOC_00000314	.	+	84.26	0.0676	0.5397	0.7458	0.4764
1	934707	934784	RLOC_00000314	.	+	96.35	0.2674	0.1072	0.3015	0.4764
1	935796	935881	RLOC_00000314	.	+	93.80	0.0773	0.4654	0.6904	0.4764
1	936571	936654	RLOC_00000314	.	+	119.97	-0.1985	0.2755	0.5186	0.4764
1	936096	936188	RLOC_00000314	.	+	116.99	-0.3593	0.04759	0.1874	0.4764
1	935068	935163	RLOC_00000314	.	+	66.21	0.2859	0.185	0.4147	0.4764
1	940677	940772	RLOC_00000318	.	+	42.59	-0.6512	0.001126	0.01881	0.03668
1	938529	938633	RLOC_00000318	.	+	8.73	0.6200	0.3591	0.6005	0.03668
1	939799	939875	RLOC_00000318	.	+	27.36	0.4829	0.09382	0.2794	0.03668
1	940366	940452	RLOC_00000318	.	+	28.95	-0.4036	0.1531	0.3721	0.03668
1	938308	938423	RLOC_00000318	.	+	12.44	0.7237	0.2716	0.5146	0.03668
1	940001	940091	RLOC_00000318	.	+	22.09	0.8733	0.08074	0.2557	0.03668
1	941571	941693	RLOC_00000319	.	-	83.77	-0.0654	0.5129	0.7264	0.09794
1	942104	942186	RLOC_00000319	.	-	57.01	0.6515	0.004393	0.04412	0.09794
1	942566	942652	RLOC_00000319	.	-	26.86	0.3920	0.1984	0.4319	0.09794
1	943038	943122	RLOC_00000319	.	-	28.34	0.7420	0.106	0.2995	0.09794
1	941430	941536	RLOC_00000319	.	-	90.66	-0.3055	0.03193	0.1479	0.09794
1	941947	942030	RLOC_00000319	.	-	69.56	-0.0365	0.8495	0.9303	0.09794
1	942819	942979	RLOC_00000319	.	-	23.93	0.4324	0.2714	0.5144	0.09794
1	941266	941365	RLOC_00000319	.	-	71.38	-0.3251	0.05485	0.2043	0.09794
1	941793	941914	RLOC_00000319	.	-	76.99	-0.0825	0.8474	0.9294	0.09794
1	947292	947398	RLOC_00000320	.	+	56.36	-0.6470	0.1693	0.3939	0.08409
1	945860	945951	RLOC_00000320	.	+	20.48	-0.5567	0.09229	0.2765	0.08409
1	945167	945471	RLOC_00000320	.	+	18.03	0.4190	0.4144	0.6491	0.08409
1	944981	945110	RLOC_00000320	.	+	5.32	0.7296	0.3497	0.5922	0.08409
1	947000	947122	RLOC_00000320	.	+	63.63	-0.5078	0.1023	0.294	0.08409
1	946071	946168	RLOC_00000320	.	+	20.66	0.9088	0.01024	0.07427	0.08409
1	946811	946893	RLOC_00000320	.	+	44.44	-0.1785	0.5121	0.7258	0.08409
1	944981	945116	RLOC_00000320	.	+	8.78	0.8513	0.03696	0.1617	0.08409
1	947018	947122	RLOC_00000320	.	+	0.00	nan	nan	nan	0.08409
1	945529	945779	RLOC_00000320	.	+	18.87	-0.0723	0.8376	0.9245	0.08409
1	946209	946308	RLOC_00000320	.	+	29.32	1.1200	0.003529	0.03868	0.08409
1	950310	950403	RLOC_00000321	.	-	18.90	0.4708	0.117	0.3177	0.06636
1	951040	951125	RLOC_00000321	.	-	9.75	1.1057	0.04533	0.1822	0.06636
1	951210	951527	RLOC_00000321	.	-	9.05	0.6729	0.1781	0.4059	0.06636
1	949206	949296	RLOC_00000321	.	-	17.82	-0.2414	0.924	0.9663	0.06636
1	948815	949075	RLOC_00000321	.	-	0.00	nan	nan	nan	0.06636
1	949620	949882	RLOC_00000321	.	-	0.00	nan	nan	nan	0.06636
1	950499	950581	RLOC_00000321	.	-	11.63	1.1982	0.06881	0.2334	0.06636
1	948991	949075	RLOC_00000321	.	-	22.92	0.0167	0.7589	0.8827	0.06636
1	948639	948696	RLOC_00000321	.	-	0.00	nan	nan	nan	0.06636
1	948008	948087	RLOC_00000321	.	-	29.92	-1.1033	0.002541	0.03151	0.06636
1	948594	948696	RLOC_00000321	.	-	29.09	-0.1285	0.8063	0.908	0.06636
1	947663	947798	RLOC_00000321	.	-	0.00	nan	nan	nan	0.06636
1	949795	949882	RLOC_00000321	.	-	25.51	-0.1167	0.7921	0.9005	0.06636
1	949451	949540	RLOC_00000321	.	-	16.09	0.0757	0.7878	0.8983	0.06636
1	949620	949733	RLOC_00000321	.	-	15.06	0.0939	0.6734	0.8325	0.06636
1	948815	948911	RLOC_00000321	.	-	19.32	-0.0406	0.9937	1	0.06636
1	948342	948428	RLOC_00000321	.	-	29.03	-0.1494	0.6865	0.8407	0.06636
1	950793	950880	RLOC_00000321	.	-	14.74	0.3804	0.1327	0.3422	0.06636
1	948146	948234	RLOC_00000321	.	-	27.70	-0.4681	0.0703	0.2361	0.06636
1	950124	950197	RLOC_00000321	.	-	23.26	0.6152	0.02455	0.1261	0.06636
1	959007	959427	RLOC_00000325	.	+	0.00	nan	nan	nan	nan
1	960293	960611	RLOC_00000326	.	-	1.23	nan	nan	nan	nan
1	964190	964294	RLOC_00000327	.	-	15.87	-0.1185	0.5713	0.7677	0.3362
1	966156	966445	RLOC_00000327	.	-	5.83	1.0165	0.0848	0.2633	0.3362
1	964625	964738	RLOC_00000327	.	-	20.98	-0.4674	0.525	0.7349	0.3362
1	964379	964503	RLOC_00000327	.	-	16.68	0.3622	0.3921	0.63	0.3362
1	963545	963638	RLOC_00000327	.	-	21.12	-0.0679	0.8989	0.9547	0.3362
1	965505	965598	RLOC_00000327	.	-	15.65	-0.0753	0.623	0.802	0.3362
1	965735	965995	RLOC_00000327	.	-	0.07	8.9261	1	nan	0.3362
1	963320	963468	RLOC_00000327	.	-	21.98	0.1079	0.5368	0.7436	0.3362
1	964872	964951	RLOC_00000327	.	-	22.07	-0.5790	0.2036	0.4386	0.3362
1	965735	965822	RLOC_00000327	.	-	10.56	0.8345	0.1941	0.427	0.3362
1	965308	965452	RLOC_00000327	.	-	20.76	-0.3027	0.9013	0.9558	0.3362
1	965040	965123	RLOC_00000327	.	-	16.64	-0.1798	0.8815	0.9458	0.3362
1	965887	965995	RLOC_00000327	.	-	8.61	1.0493	0.02637	0.1319	0.3362
1	969710	969907	RLOC_00000328	.	-	6.50	-0.6925	0.1682	0.3925	0.8076
1	969704	969907	RLOC_00000328	.	-	0.00	nan	nan	nan	0.8076
1	968567	969314	RLOC_00000328	.	-	9.79	0.5608	0.1474	0.3639	0.8076
1	976500	977279	RLOC_00000329	.	-	1.70	1.0259	1	nan	1
1	976500	977367	RLOC_00000329	.	-	13.26	0.0409	0.6886	0.8421	1
1	976073	976420	RLOC_00000329	.	-	1.90	-1.3384	0.3466	nan	1
1	980893	980986	RLOC_00000330	.	-	234.57	0.3167	0.04835	0.1892	0.4807
1	981159	981772	RLOC_00000330	.	-	307.11	0.2565	0.05632	0.2076	0.4807
1	980102	980184	RLOC_00000330	.	-	406.39	-0.0643	0.3371	0.5804	0.4807
1	980354	980777	RLOC_00000330	.	-	281.35	-0.0785	0.5237	0.7338	0.4807
1	981159	981562	RLOC_00000330	.	-	0.93	-3.9279	0.772	nan	0.4807
1	979798	979890	RLOC_00000330	.	-	458.28	-0.1579	0.04992	0.1929	0.4807
1	977245	990991	RLOC_00000331	.	-	0.13	-16.1305	0.7084	nan	nan
1	982832	982914	RLOC_00000331	.	-	0.27	7.2716	0.9277	nan	nan
1	973516	982509	RLOC_00000331	.	-	0.05	5.1610	0.986	nan	nan
1	973517	982509	RLOC_00000331	.	-	0.02	4.3026	0.9538	nan	nan
1	986540	986853	RLOC_00000332	.	+	5.19	-0.4050	0.8001	0.9045	1
1	987281	987523	RLOC_00000332	.	+	8.99	0.4687	0.9322	0.9701	1
1	986067	986278	RLOC_00000332	.	+	5.07	-0.4451	0.7173	0.8591	1
1	989549	989652	RLOC_00000333	.	+	0.83	0.1183	0.9135	nan	nan
1	990458	990530	RLOC_00000333	.	+	0.87	0.1949	0.871	nan	nan
1	989917	990048	RLOC_00000333	.	+	0.59	-0.3611	0.9393	nan	nan
1	992690	992777	RLOC_00000334	.	+	500.45	-0.2400	9.377e-05	0.003676	0.005345
1	991745	992442	RLOC_00000334	.	+	597.49	0.2274	7.837e-05	0.003249	0.005345
1	994913	995312	RLOC_00000335	.	+	19.40	-0.4553	0.2015	0.4359	0.8601
1	994404	994495	RLOC_00000335	.	+	14.23	0.6259	0.1814	0.4104	0.8601
1	993630	994045	RLOC_00000335	.	+	6.45	-0.0279	0.8225	0.9165	0.8601
1	993950	994045	RLOC_00000335	.	+	5.99	-0.7458	0.7042	0.8513	0.8601
1	993630	993705	RLOC_00000335	.	+	1.12	-0.7298	0.5621	nan	0.8601
1	994631	994827	RLOC_00000335	.	+	9.00	0.0116	0.8381	0.9247	0.8601
1	994205	994353	RLOC_00000335	.	+	11.28	0.5887	0.2148	0.4517	0.8601
1	1000025	1000111	RLOC_00000336	.	+	319.23	-0.8474	0.001334	0.02097	0.04123
1	996938	997009	RLOC_00000336	.	+	0.12	9.0794	0.9423	nan	0.04123
1	996733	996847	RLOC_00000336	.	+	146.21	0.4174	0.01308	0.08613	0.04123
1	999679	999759	RLOC_00000336	.	+	265.63	0.0362	0.487	0.707	0.04123
1	997275	997417	RLOC_00000336	.	+	190.12	-0.2259	0.4123	0.6474	0.04123
1	997894	998168	RLOC_00000336	.	+	0.00	nan	nan	nan	0.04123
1	997894	998419	RLOC_00000336	.	+	183.80	0.1769	0.2697	0.5127	0.04123
1	999410	999503	RLOC_00000336	.	+	215.47	-0.1863	0.5001	0.7166	0.04123
1	997488	997603	RLOC_00000336	.	+	214.69	-0.1293	0.5774	0.772	0.04123
1	998514	998732	RLOC_00000336	.	+	128.14	0.2264	0.1223	0.3261	0.04123
1	999016	999108	RLOC_00000336	.	+	185.52	0.2208	0.1273	0.3339	0.04123
1	997059	997176	RLOC_00000336	.	+	4.49	-2.2367	0.1952	0.4282	0.04123
1	996938	997176	RLOC_00000336	.	+	175.27	0.3063	0.02718	0.1344	0.04123
1	996216	996425	RLOC_00000336	.	+	109.54	0.3005	0.1159	0.3159	0.04123
1	998299	998419	RLOC_00000336	.	+	0.00	nan	nan	nan	0.04123
1	997665	997754	RLOC_00000336	.	+	247.37	-0.0427	0.8508	0.9309	0.04123
1	1002383	1002470	RLOC_00000337	.	+	6.04	0.3235	0.5506	0.7536	0.4734
1	1003267	1003388	RLOC_00000337	.	+	3.97	1.0283	0.1323	0.3414	0.4734
1	1003893	1003970	RLOC_00000337	.	+	9.69	-0.9588	0.2489	0.4902	0.4734
1	1001300	1001435	RLOC_00000337	.	+	2.20	2.4704	0.1266	0.3329	0.4734
1	1001746	1001808	RLOC_00000337	.	+	2.33	0.8373	0.2053	0.4405	0.4734
1	1003653	1003809	RLOC_00000337	.	+	9.75	-0.1050	0.7568	0.8814	0.4734
1	1002861	1002947	RLOC_00000337	.	+	14.52	0.0794	0.6075	0.7922	0.4734
1	1002686	1002782	RLOC_00000337	.	+	15.45	0.5478	0.202	0.4366	0.4734
1	1003031	1003136	RLOC_00000337	.	+	8.88	0.2550	0.5376	0.7442	0.4734
1	1004026	1004124	RLOC_00000337	.	+	12.02	-1.0715	0.0471	0.1862	0.4734
1	1002066	1002142	RLOC_00000337	.	+	2.19	-1.0792	0.6765	0.8343	0.4734
1	1003501	1003606	RLOC_00000337	.	+	7.76	-0.0893	0.8363	0.9239	0.4734
1	1006641	1006733	RLOC_00000338	.	+	218.61	-0.0988	0.2948	0.5383	0.4173
1	1005814	1005925	RLOC_00000338	.	+	78.51	0.1583	0.4446	0.6739	0.4173
1	1005513	1005611	RLOC_00000338	.	+	135.69	0.1852	0.2731	0.5161	0.4173
1	1007374	1007458	RLOC_00000338	.	+	154.49	0.0279	0.8957	0.9533	0.4173
1	1007524	1007601	RLOC_00000338	.	+	181.01	-0.1743	0.2478	0.4891	0.4173
1	1006796	1006916	RLOC_00000338	.	+	219.91	-0.0285	0.7659	0.8866	0.4173
1	1006497	1006580	RLOC_00000338	.	+	130.87	0.1588	0.5327	0.7406	0.4173
1	1007206	1007289	RLOC_00000338	.	+	158.30	-0.0768	0.712	0.8558	0.4173
1	1006073	1006175	RLOC_00000338	.	+	109.77	0.3252	0.3701	0.6105	0.4173
1	1006270	1006427	RLOC_00000338	.	+	138.75	0.0865	0.8959	0.9534	0.4173
1	1007731	1007827	RLOC_00000338	.	+	237.66	-0.2241	0.03769	0.1636	0.4173
1	1007000	1007080	RLOC_00000338	.	+	192.10	0.0581	0.8281	0.9195	0.4173
1	1005651	1005745	RLOC_00000338	.	+	113.52	0.3000	0.09676	0.2847	0.4173
1	1010117	1010248	RLOC_00000339	.	+	22.71	0.9997	0.004749	0.04634	0.1035
1	1008863	1008962	RLOC_00000339	.	+	5.09	-1.9066	0.01349	0.08773	0.1035
1	1011432	1011501	RLOC_00000341	.	-	157.41	-0.2939	0.2606	0.5032	0.03921
1	1012679	1012867	RLOC_00000341	.	-	109.12	0.1959	0.2475	0.4887	0.03921
1	1011688	1011777	RLOC_00000341	.	-	202.07	-0.2586	0.04237	0.1752	0.03921
1	1011556	1011653	RLOC_00000341	.	-	184.13	-0.2833	0.04918	0.1912	0.03921
1	1012235	1012334	RLOC_00000341	.	-	168.92	0.2732	0.1214	0.3245	0.03921
1	1012438	1012508	RLOC_00000341	.	-	121.15	0.5549	0.00124	0.02003	0.03921
1	1012012	1012164	RLOC_00000341	.	-	127.03	0.0405	0.8314	0.9211	0.03921
1	1011857	1011941	RLOC_00000341	.	-	175.83	-0.2823	0.1259	0.3318	0.03921
1	1012911	1013178	RLOC_00000341	.	-	107.65	0.1281	0.4344	0.6656	0.03921
1	1012558	1012645	RLOC_00000341	.	-	112.61	0.2421	0.1275	0.3342	0.03921
1	1015303	1015427	RLOC_00000342	.	+	31.59	0.0951	0.5614	0.7608	0.08212
1	1015049	1015198	RLOC_00000342	.	+	30.10	-0.1755	0.8895	0.9501	0.08212
1	1016225	1016339	RLOC_00000342	.	+	16.15	0.2694	0.3456	0.5883	0.08212
1	1014236	1014333	RLOC_00000342	.	+	22.39	-0.2788	0.9932	0.9999	0.08212
1	1016178	1016339	RLOC_00000342	.	+	3.69	-1.5730	0.8123	0.911	0.08212
1	1015517	1015683	RLOC_00000342	.	+	46.00	0.1931	0.3121	0.5561	0.08212
1	1014871	1014950	RLOC_00000342	.	+	35.68	0.9214	0.009117	0.06942	0.08212
1	1016448	1016794	RLOC_00000342	.	+	69.93	-0.2254	0.5788	0.7729	0.08212
1	1017182	1017331	RLOC_00000342	.	+	44.27	-0.2314	0.7185	0.8597	0.08212
1	1017480	1017567	RLOC_00000342	.	+	87.91	-0.5451	0.05434	0.2031	0.08212
1	1014542	1014634	RLOC_00000342	.	+	0.85	-0.7779	0.4915	nan	0.08212
1	1014542	1014620	RLOC_00000342	.	+	19.02	-0.3671	0.5987	0.7865	0.08212
1	1014236	1014413	RLOC_00000342	.	+	0.13	7.8500	1	nan	0.08212
1	1016950	1017057	RLOC_00000342	.	+	50.13	0.4328	0.04953	0.192	0.08212
1	1014542	1014766	RLOC_00000342	.	+	17.12	1.2313	0.003418	0.03788	0.08212
1	1015824	1016078	RLOC_00000342	.	+	48.78	-0.0924	0.9804	0.9935	0.08212
1	1014675	1014766	RLOC_00000342	.	+	16.80	-0.5129	0.219	0.4567	0.08212
1	1019054	1019314	RLOC_00000343	.	+	0.14	nan	nan	nan	nan
1	1019393	1019603	RLOC_00000345	.	-	1.44	3.0157	0.2328	nan	0.4796
1	1020413	1020512	RLOC_00000345	.	-	3.08	-2.2491	0.04812	0.1886	0.4796
1	1021219	1021286	RLOC_00000345	.	-	1.43	2.3140	0.5449	nan	0.4796
1	1019778	1019905	RLOC_00000345	.	-	3.35	0.1343	0.9941	1	0.4796
1	1021442	1021799	RLOC_00000345	.	-	1.05	1.4162	1	nan	0.4796
1	1020091	1020186	RLOC_00000345	.	-	0.43	2.7199	0.9293	nan	0.4796
1	1020817	1020981	RLOC_00000345	.	-	0.00	nan	nan	nan	0.4796
1	1020563	1020654	RLOC_00000345	.	-	2.82	-2.1606	0.2873	0.5308	0.4796
1	1022745	1022830	RLOC_00000346	.	-	0.00	nan	nan	nan	nan
1	1022911	1023007	RLOC_00000346	.	-	0.00	nan	nan	nan	nan
1	1027563	1027898	RLOC_00000347	.	-	1.58	-0.7025	0.8546	nan	0.4167
1	1025586	1026065	RLOC_00000347	.	-	14.13	-0.5858	0.2808	0.5239	0.4167
1	1027563	1027918	RLOC_00000347	.	-	2.22	2.1974	0.03759	0.1634	0.4167
1	1025115	1025366	RLOC_00000347	.	-	12.54	0.1386	0.816	0.9129	0.4167
1	1025094	1025292	RLOC_00000348	.	+	0.00	nan	nan	nan	nan
1	1025567	1025864	RLOC_00000348	.	+	0.79	nan	nan	nan	nan
1	1032411	1032581	RLOC_00000349	.	-	39.51	-0.4781	0.2023	0.437	0.3474
1	1034028	1034121	RLOC_00000349	.	-	26.83	0.2465	0.4272	0.6595	0.3474
1	1035283	1035382	RLOC_00000349	.	-	12.56	0.1863	0.475	0.698	0.3474
1	1035054	1035139	RLOC_00000349	.	-	19.59	0.3669	0.221	0.4589	0.3474
1	1031423	1031529	RLOC_00000349	.	-	0.54	-0.5760	0.8535	nan	0.3474
1	1031572	1031688	RLOC_00000349	.	-	26.65	-0.8416	0.05714	0.2093	0.3474
1	1034337	1034701	RLOC_00000349	.	-	12.89	0.5575	0.1501	0.3678	0.3474
1	1032652	1032807	RLOC_00000349	.	-	31.05	0.1415	0.6147	0.7967	0.3474
1	1033536	1033875	RLOC_00000349	.	-	19.43	-0.3999	0.2669	0.5098	0.3474
1	1032162	1032243	RLOC_00000349	.	-	31.99	0.1523	0.4694	0.6933	0.3474
1	1034777	1034885	RLOC_00000349	.	-	16.47	0.9941	0.02773	0.1359	0.3474
1	1031783	1031900	RLOC_00000349	.	-	39.49	-0.0401	0.884	0.9472	0.3474
1	1031984	1032058	RLOC_00000349	.	-	38.30	0.0286	0.9962	1	0.3474
1	1033280	1033437	RLOC_00000349	.	-	19.52	-0.7001	0.571	0.7676	0.3474
1	1032858	1033186	RLOC_00000349	.	-	17.74	0.7641	0.07161	0.2386	0.3474
1	1035517	1035885	RLOC_00000349	.	-	19.95	-0.1133	0.9759	0.9913	0.3474
1	1039084	1039223	RLOC_00000350	.	+	25.36	-0.1514	0.9103	0.9601	0.2887
1	1037745	1037923	RLOC_00000350	.	+	14.46	0.9119	0.02096	0.1145	0.2887
1	1036849	1036943	RLOC_00000350	.	+	17.81	0.1471	0.5985	0.7863	0.2887
1	1037440	1037530	RLOC_00000350	.	+	23.20	0.5591	0.07802	0.2509	0.2887
1	1038375	1038518	RLOC_00000350	.	+	32.40	-0.1769	0.9131	0.9613	0.2887
1	1039388	1039487	RLOC_00000350	.	+	25.80	0.3264	0.3206	0.5646	0.2887
1	1039605	1039694	RLOC_00000350	.	+	24.95	-0.7453	0.06594	0.2278	0.2887
1	1036691	1036796	RLOC_00000350	.	+	17.98	0.0099	0.8134	0.9115	0.2887
1	1037017	1037092	RLOC_00000350	.	+	0.00	nan	nan	nan	0.2887
[truncated: 163,671 more rows]
