# Supplementary material for: Widespread premature transcription termination of Arabidopsis thaliana NLR genes by the spen protein FPA
Source: eLife. 2021 Apr 27;10:e65537. doi: 10.7554/eLife.65537 (PMC8116057; doi:10.7554/eLife.65537)
Supplement: Figure 2—source data 9. [file elife-65537-fig2-data9.tds]

1	3912	3995	RLOC_00000001	.	+	17.68	0.1098	0.828	0.9161	0.556
1	5094	5173	RLOC_00000001	.	+	29.49	-0.7601	0.06891	0.2293	0.556
1	5325	5438	RLOC_00000001	.	+	25.44	-0.0117	0.9679	0.9859	0.556
1	4604	4705	RLOC_00000001	.	+	21.31	0.1597	0.615	0.7888	0.556
1	4275	4485	RLOC_00000001	.	+	19.92	0.6484	0.08808	0.2646	0.556
1	6262	6436	RLOC_00000002	.	-	0.19	-0.2066	0.9754	nan	0.2298
1	8463	8593	RLOC_00000002	.	-	36.52	-0.1523	0.7041	0.845	0.2298
1	12353	12423	RLOC_00000002	.	-	1.39	1.7290	0.5123	nan	0.2298
1	13172	13334	RLOC_00000002	.	-	32.93	0.5350	0.1895	0.4109	0.2298
1	7068	7156	RLOC_00000002	.	-	151.88	-0.5047	0.0162	0.0964	0.2298
1	7648	7761	RLOC_00000002	.	-	146.43	-0.3850	0.07632	0.2434	0.2298
1	7449	7563	RLOC_00000002	.	-	100.75	-0.0918	0.5099	0.7146	0.2298
1	8463	8570	RLOC_00000002	.	-	112.87	0.1944	0.5441	0.7399	0.2298
1	8324	8416	RLOC_00000002	.	-	149.49	0.4637	0.0512	0.1925	0.2298
1	7834	7941	RLOC_00000002	.	-	82.87	0.0597	0.7463	0.8702	0.2298
1	7648	8235	RLOC_00000002	.	-	1.91	2.4623	0.3971	nan	0.2298
1	7986	8235	RLOC_00000002	.	-	72.11	0.5681	0.03352	0.1492	0.2298
1	7231	7383	RLOC_00000002	.	-	114.26	-0.0632	0.5541	0.747	0.2298
1	24961	25040	RLOC_00000004	.	+	20.91	1.0498	0.009418	0.06967	0.00086
1	27532	27617	RLOC_00000004	.	+	23.15	0.4692	0.07264	0.2365	0.00086
1	30815	30901	RLOC_00000004	.	+	242.64	-1.4207	5.774e-06	0.0006279	0.00086
1	29079	29159	RLOC_00000004	.	+	76.07	-0.2048	0.9568	0.9808	0.00086
1	27712	27802	RLOC_00000004	.	+	38.99	0.2657	0.1939	0.4169	0.00086
1	28430	28707	RLOC_00000004	.	+	37.02	0.2470	0.1841	0.4042	0.00086
1	27280	27371	RLOC_00000004	.	+	19.63	1.2317	0.004172	0.04242	0.00086
1	25742	25824	RLOC_00000004	.	+	19.84	0.5604	0.06298	0.2174	0.00086
1	25434	25523	RLOC_00000004	.	+	26.68	1.6221	6.324e-06	0.0006705	0.00086
1	26202	26291	RLOC_00000004	.	+	28.79	1.0717	0.00147	0.02236	0.00086
1	26451	26542	RLOC_00000004	.	+	24.34	1.3918	2.871e-05	0.001846	0.00086
1	30064	30146	RLOC_00000004	.	+	152.41	-0.2580	0.9458	0.976	0.00086
1	27011	27098	RLOC_00000004	.	+	59.10	-0.4862	0.7987	0.8998	0.00086
1	28804	28889	RLOC_00000004	.	+	48.63	0.2494	0.07614	0.2431	0.00086
1	27535	27617	RLOC_00000004	.	+	2.25	0.3507	0.1827	nan	0.00086
1	26775	26861	RLOC_00000004	.	+	48.46	-0.3442	0.9345	0.9707	0.00086
1	24450	24541	RLOC_00000004	.	+	20.12	0.2170	0.2833	0.5168	0.00086
1	24654	24751	RLOC_00000004	.	+	27.47	-0.0320	0.42	0.6439	0.00086
1	25996	26080	RLOC_00000004	.	+	33.79	-0.0890	0.4741	0.6872	0.00086
1	30310	30409	RLOC_00000004	.	+	146.70	-0.2319	0.9889	0.9951	0.00086
1	32194	32281	RLOC_00000006	.	-	405.89	0.2454	0.0159	0.09526	0.03462
1	31423	31520	RLOC_00000006	.	-	607.50	-0.0817	0.6092	0.7849	0.03462
1	31601	31692	RLOC_00000006	.	-	716.92	-0.3239	0.00111	0.01884	0.03462
1	32346	32430	RLOC_00000006	.	-	414.66	0.1109	0.1048	0.2928	0.03462
1	32458	32546	RLOC_00000006	.	-	449.44	0.0495	0.426	0.6485	0.03462
1	31997	32087	RLOC_00000006	.	-	461.68	0.1089	0.2576	0.4896	0.03462
1	32669	33028	RLOC_00000006	.	-	422.70	0.1994	0.1451	0.3532	0.03462
1	31812	31932	RLOC_00000006	.	-	506.00	-0.1936	0.0794	0.249	0.03462
1	32669	32838	RLOC_00000006	.	-	0.00	nan	nan	nan	0.03462
1	32669	33028	RLOC_00000007	.	+	0.31	nan	nan	nan	nan
1	36920	37022	RLOC_00000008	.	-	195.19	0.8534	0.0003767	0.009503	0.01594
1	37202	37372	RLOC_00000008	.	-	127.71	0.3106	0.03197	0.1448	0.01594
1	35962	36623	RLOC_00000008	.	-	337.18	-0.1300	0.866	0.9363	0.01594
1	33588	33980	RLOC_00000008	.	-	0.46	0.0419	0.7759	nan	0.01594
1	35473	35566	RLOC_00000008	.	-	184.11	0.0345	0.7065	0.8463	0.01594
1	35646	35729	RLOC_00000008	.	-	266.94	-0.1924	0.4495	0.6681	0.01594
1	34326	34400	RLOC_00000008	.	-	487.31	-0.6978	0.01007	0.07261	0.01594
1	36684	36809	RLOC_00000008	.	-	239.79	0.0771	0.3803	0.609	0.01594
1	35998	36089	RLOC_00000008	.	-	0.00	nan	nan	nan	0.01594
1	36170	36623	RLOC_00000008	.	-	0.00	nan	nan	nan	0.01594
1	35470	35566	RLOC_00000008	.	-	107.55	-0.2649	0.5682	0.7568	0.01594
1	37397	37568	RLOC_00000008	.	-	124.10	0.2308	0.0935	0.2741	0.01594
1	37202	37301	RLOC_00000008	.	-	5.29	-0.5607	0.7772	nan	0.01594
1	39286	39408	RLOC_00000009	.	-	42.95	-0.0718	0.8561	0.9314	0.7184
1	39053	39135	RLOC_00000009	.	-	48.42	-0.6995	0.1212	0.3188	0.7184
1	40534	40674	RLOC_00000009	.	-	48.96	0.2311	0.1557	0.3681	0.7184
1	39813	40212	RLOC_00000009	.	-	31.36	0.1175	0.561	0.7518	0.7184
1	40328	40472	RLOC_00000009	.	-	46.44	0.0624	0.5517	0.7453	0.7184
1	30298	49075	RLOC_00000010	.	-	0.25	1.1569	1	nan	nan
1	36874	50320	RLOC_00000010	.	-	0.04	-1.2083	0.9067	nan	nan
1	50336	50418	RLOC_00000010	.	-	0.04	-1.2083	0.9067	nan	nan
1	47981	48074	RLOC_00000011	.	-	1888.85	-0.4379	4.616e-07	0.0001138	0.000146
1	46144	46372	RLOC_00000011	.	-	0.46	-11.6323	0.79	nan	0.000146
1	48851	48935	RLOC_00000011	.	-	799.43	0.2864	0.0009734	0.0174	0.000146
1	46144	46375	RLOC_00000011	.	-	434.09	0.2494	0.002748	0.03256	0.000146
1	45558	45645	RLOC_00000011	.	-	500.68	0.0992	0.05726	0.2058	0.000146
1	45953	46043	RLOC_00000011	.	-	533.89	-0.0103	0.3218	0.5548	0.000146
1	50962	51122	RLOC_00000012	.	-	1.32	-12.5450	0.4308	nan	0.005124
1	50446	50495	RLOC_00000012	.	-	4.14	0.9057	0.5754	nan	0.005124
1	50336	50418	RLOC_00000012	.	-	3070.45	-0.2465	7.511e-05	0.003447	0.005124
1	50962	51063	RLOC_00000012	.	-	17.24	-0.7864	0.1347	0.3386	0.005124
1	50630	50882	RLOC_00000012	.	-	4144.27	0.0755	0.01348	0.08629	0.005124
1	50962	51125	RLOC_00000012	.	-	2787.43	0.0823	0.02337	0.1201	0.005124
1	53182	53483	RLOC_00000013	.	+	28.57	0.1023	0.9469	0.9764	0.4496
1	52729	52937	RLOC_00000013	.	+	17.41	0.4762	0.2198	0.4483	0.4496
1	53623	53702	RLOC_00000013	.	+	23.95	-0.5031	0.04661	0.1819	0.4496
1	52345	52433	RLOC_00000013	.	+	12.74	0.6593	0.2103	0.4369	0.4496
1	48823	61923	RLOC_00000014	.	-	0.10	-8.0532	0.8088	nan	nan
1	49432	64353	RLOC_00000014	.	-	0.07	-7.6706	0.7877	nan	nan
1	64474	64581	RLOC_00000014	.	-	0.14	-8.6309	0.821	nan	nan
1	52297	64353	RLOC_00000014	.	-	0.07	-7.6706	0.7877	nan	nan
1	57522	57609	RLOC_00000014	.	-	0.54	-10.5940	0.8803	nan	nan
1	57938	69512	RLOC_00000014	.	-	0.06	-7.4563	0.8158	nan	nan
1	57907	74375	RLOC_00000014	.	-	0.22	-9.3473	0.8959	nan	nan
1	47981	48074	RLOC_00000014	.	-	0.39	-10.0466	0.8636	nan	nan
1	48114	67556	RLOC_00000014	.	-	0.39	-10.0466	0.8636	nan	nan
1	58704	58813	RLOC_00000014	.	-	0.38	5.6888	0.6256	nan	nan
1	45728	59329	RLOC_00000014	.	-	0.06	16.8279	0.6035	nan	nan
1	65651	65732	RLOC_00000015	.	-	5.93	-1.1422	0.1547	nan	0.02235
1	66748	66834	RLOC_00000015	.	-	481.54	0.1951	0.01284	0.08385	0.02235
1	62860	63364	RLOC_00000015	.	-	0.85	-3.6101	0.4085	nan	0.02235
1	64474	64569	RLOC_00000015	.	-	0.00	nan	nan	nan	0.02235
1	66556	66677	RLOC_00000015	.	-	489.14	0.1420	0.06265	0.2168	0.02235
1	64806	64900	RLOC_00000015	.	-	444.45	-0.0432	0.9211	0.9641	0.02235
1	61948	62049	RLOC_00000015	.	-	1.33	-1.9070	0.5712	nan	0.02235
1	65216	65330	RLOC_00000015	.	-	546.36	-0.1902	0.07652	0.2437	0.02235
1	62123	63556	RLOC_00000015	.	-	0.00	nan	nan	nan	0.02235
1	65651	65738	RLOC_00000015	.	-	464.13	0.0551	0.4892	0.6993	0.02235
1	65016	65109	RLOC_00000015	.	-	624.48	-0.2866	0.007662	0.06139	0.02235
1	65455	65562	RLOC_00000015	.	-	483.67	0.2119	0.09292	0.2731	0.02235
1	64474	64581	RLOC_00000015	.	-	468.14	-0.3719	0.03384	0.1501	0.02235
1	66159	66261	RLOC_00000015	.	-	393.05	-0.0083	0.8695	0.9383	0.02235
1	64655	64750	RLOC_00000015	.	-	465.43	-0.1630	0.3881	0.6156	0.02235
1	66341	66449	RLOC_00000015	.	-	503.46	-0.0665	0.7571	0.8765	0.02235
1	66896	67323	RLOC_00000015	.	-	385.70	0.3414	0.0005976	0.01281	0.02235
1	65863	66106	RLOC_00000015	.	-	373.85	0.0614	0.522	0.7241	0.02235
1	70967	71040	RLOC_00000016	.	-	1.77	nan	nan	nan	nan
1	70284	70839	RLOC_00000016	.	-	0.00	nan	nan	nan	nan
1	71720	71941	RLOC_00000016	.	-	0.00	nan	nan	nan	nan
1	70232	70895	RLOC_00000016	.	-	0.00	nan	nan	nan	nan
1	73015	73086	RLOC_00000017	.	+	0.00	nan	nan	nan	0.6389
1	72668	72914	RLOC_00000017	.	+	0.00	nan	nan	nan	0.6389
1	72668	73086	RLOC_00000017	.	+	376.01	0.1286	0.296	0.5296	0.6389
1	73394	73487	RLOC_00000017	.	+	326.47	0.1001	0.09242	0.2722	0.6389
1	73739	73821	RLOC_00000017	.	+	414.04	-0.3639	0.1425	0.3493	0.6389
1	73162	73286	RLOC_00000017	.	+	339.33	-0.0451	0.9619	0.9829	0.6389
1	72668	73086	RLOC_00000018	.	-	4.23	0.0387	0.8839	nan	nan
1	57907	74375	RLOC_00000018	.	-	0.22	-10.0314	0.9834	nan	nan
1	73162	73286	RLOC_00000018	.	-	0.16	11.6649	0.7844	nan	nan
1	74454	74660	RLOC_00000019	.	-	963.26	0.1248	0.02894	0.1362	0.3359
1	74448	74660	RLOC_00000019	.	-	30.99	-0.1682	0.6867	0.8346	0.3359
1	74249	74337	RLOC_00000019	.	-	1910.13	-0.0949	0.03147	0.1435	0.3359
1	74249	74337	RLOC_00000020	.	+	0.52	0.6795	0.8066	nan	nan
1	74454	74660	RLOC_00000020	.	+	0.16	-1.0769	0.8066	nan	nan
1	78088	79096	RLOC_00000022	.	+	4.55	nan	nan	nan	nan
1	83670	83883	RLOC_00000023	.	-	13.34	nan	nan	nan	nan
1	87161	87879	RLOC_00000024	.	-	3.47	nan	nan	nan	nan
1	89262	89404	RLOC_00000025	.	+	207.50	-0.0208	0.6952	0.8395	0.5569
1	89578	90161	RLOC_00000025	.	+	19.22	0.6798	0.06913	0.2297	0.5569
1	89080	89172	RLOC_00000025	.	+	222.48	-0.0364	0.6458	0.8089	0.5569
1	88729	88953	RLOC_00000025	.	+	0.00	nan	nan	nan	0.5569
1	94280	94356	RLOC_00000027	.	+	68.47	-0.1339	0.8426	0.9242	0.2212
1	95074	95159	RLOC_00000027	.	+	80.20	-0.5048	0.04043	0.1673	0.2212
1	91632	91742	RLOC_00000027	.	+	19.76	0.9124	0.01528	0.09302	0.2212
1	92088	92269	RLOC_00000027	.	+	2.85	2.3574	0.131	nan	0.2212
1	92932	93044	RLOC_00000027	.	+	30.72	-0.3927	0.5253	0.7265	0.2212
1	93170	93270	RLOC_00000027	.	+	39.64	-0.2007	0.8244	0.914	0.2212
1	92069	92269	RLOC_00000027	.	+	18.59	0.4827	0.1407	0.3468	0.2212
1	92500	92568	RLOC_00000027	.	+	27.61	0.6963	0.01805	0.1028	0.2212
1	96156	96553	RLOC_00000029	.	+	30.17	0.3108	0.5161	0.7196	0.9774
1	97804	98456	RLOC_00000029	.	+	381.69	-0.0907	0.4008	0.6272	0.9774
1	98604	98907	RLOC_00000029	.	+	412.93	0.0472	0.6169	0.7903	0.9774
1	100030	100592	RLOC_00000030	.	+	0.65	1.1425	0.6006	nan	0.6058
1	100030	100110	RLOC_00000030	.	+	4.11	-0.1001	0.9466	nan	0.6058
1	100030	100656	RLOC_00000030	.	+	219.33	0.1079	0.08221	0.2542	0.6058
1	100219	100656	RLOC_00000030	.	+	22.40	-0.4422	0.1905	0.4123	0.6058
1	105296	105432	RLOC_00000031	.	-	0.50	nan	nan	nan	nan
1	109329	109405	RLOC_00000032	.	+	11.81	-0.0123	0.7223	0.8558	1
1	109329	109412	RLOC_00000032	.	+	3.52	0.0102	0.6812	nan	1
1	113194	113278	RLOC_00000034	.	+	0.00	nan	nan	nan	nan
1	114432	114618	RLOC_00000035	.	+	115.77	0.7631	1.751e-10	2.267e-07	3.036e-07
1	115338	115481	RLOC_00000035	.	+	2.73	1.8440	0.05031	nan	3.036e-07
1	115338	115960	RLOC_00000035	.	+	98.83	-1.1125	2.693e-10	3.269e-07	3.036e-07
1	117202	122768	RLOC_00000036	.	+	0.08	-8.5520	0.9124	nan	1
1	117201	130683	RLOC_00000036	.	+	0.08	-8.5519	0.9124	nan	1
1	117202	136244	RLOC_00000036	.	+	0.08	-8.5519	0.9124	nan	1
1	117877	117948	RLOC_00000036	.	+	8.99	0.6574	0.6301	0.7991	1
1	118214	118485	RLOC_00000036	.	+	1.74	-1.8940	0.7869	nan	1
1	117202	122768	RLOC_00000037	.	+	0.08	0.0000	0.9712	nan	nan
1	117201	130683	RLOC_00000037	.	+	0.08	-0.0000	0.9712	nan	nan
1	117202	136244	RLOC_00000037	.	+	0.08	-0.0000	0.9712	nan	nan
1	129059	129852	RLOC_00000038	.	-	360.54	-0.1774	0.4144	0.6392	0.004298
1	126588	126685	RLOC_00000038	.	-	254.10	0.0522	0.1539	0.3658	0.004298
1	125225	125328	RLOC_00000038	.	-	554.27	-0.1249	0.8164	0.9095	0.004298
1	124122	124210	RLOC_00000038	.	-	435.85	0.0264	0.1615	0.3757	0.004298
1	127934	128027	RLOC_00000038	.	-	279.00	0.3107	0.005908	0.0525	0.004298
1	125021	125133	RLOC_00000038	.	-	462.99	0.1813	0.01699	0.09933	0.004298
1	125045	125133	RLOC_00000038	.	-	0.00	nan	nan	nan	0.004298
1	129913	130038	RLOC_00000038	.	-	332.99	-0.3381	0.2211	0.4498	0.004298
1	123668	123784	RLOC_00000038	.	-	618.92	-0.3168	0.02014	0.1097	0.004298
1	125997	126075	RLOC_00000038	.	-	344.16	0.1396	0.03993	0.166	0.004298
1	126839	126934	RLOC_00000038	.	-	299.09	0.1725	0.05444	0.1997	0.004298
1	123896	123991	RLOC_00000038	.	-	576.14	-0.2502	0.3774	0.6063	0.004298
1	124631	124713	RLOC_00000038	.	-	354.93	0.1727	0.00956	0.07032	0.004298
1	123500	123578	RLOC_00000038	.	-	586.12	-0.1409	0.3801	0.6088	0.004298
1	124393	124498	RLOC_00000038	.	-	338.11	0.1001	0.0671	0.2258	0.004298
1	125654	125741	RLOC_00000038	.	-	330.58	0.1052	0.2843	0.5179	0.004298
1	128311	128478	RLOC_00000038	.	-	255.65	0.3101	0.01045	0.0742	0.004298
1	123494	123578	RLOC_00000038	.	-	2.96	-1.0142	0.2481	nan	0.004298
1	121405	121492	RLOC_00000038	.	-	1015.54	-1.0360	0.001511	0.02275	0.004298
1	124817	124920	RLOC_00000038	.	-	457.66	0.1558	0.006538	0.05582	0.004298
1	127572	127650	RLOC_00000038	.	-	204.54	-0.0120	0.2896	0.5232	0.004298
1	128550	128967	RLOC_00000038	.	-	315.10	0.1371	0.07454	0.2401	0.004298
1	127452	127531	RLOC_00000038	.	-	241.58	0.0179	0.184	0.404	0.004298
1	125842	125935	RLOC_00000038	.	-	319.54	0.1524	0.05474	0.2003	0.004298
1	127781	127867	RLOC_00000038	.	-	201.88	0.7053	5.719e-05	0.002923	0.004298
1	130148	130371	RLOC_00000038	.	-	202.40	0.6872	0.001188	0.01959	0.004298
1	117202	122768	RLOC_00000039	.	+	0.08	0.0000	0.9712	nan	nan
1	117201	130683	RLOC_00000039	.	+	0.08	-0.0000	0.9712	nan	nan
1	117202	136244	RLOC_00000039	.	+	0.08	-0.0000	0.9712	nan	nan
1	117202	136244	RLOC_00000040	.	+	0.08	-9.5905	0.8345	nan	nan
1	130121	137091	RLOC_00000040	.	+	0.08	9.7612	0.8345	nan	nan
1	132743	132823	RLOC_00000041	.	-	2.36	0.6820	0.7412	nan	0.9934
1	135103	135187	RLOC_00000041	.	-	2.37	-0.7825	1	nan	0.9934
1	133538	133640	RLOC_00000041	.	-	5.06	1.2409	0.089	nan	0.9934
1	133217	133302	RLOC_00000041	.	-	3.05	0.9736	0.2717	nan	0.9934
1	134500	134581	RLOC_00000041	.	-	4.11	-1.1353	0.7078	nan	0.9934
1	134205	134288	RLOC_00000041	.	-	1.20	-2.8353	0.3656	nan	0.9934
1	135268	135707	RLOC_00000041	.	-	2.89	-1.1758	0.8466	nan	0.9934
1	133751	133910	RLOC_00000041	.	-	8.58	-0.5404	0.4625	0.6786	0.9934
1	136815	136934	RLOC_00000042	.	+	79.56	0.4365	0.05786	0.207	0.2384
1	137757	137847	RLOC_00000042	.	+	186.47	-0.2961	0.01703	0.09943	0.2384
1	136233	136666	RLOC_00000042	.	+	32.82	0.1470	0.5489	0.7434	0.2384
1	138777	138862	RLOC_00000043	.	+	0.00	nan	nan	nan	nan
1	138777	138874	RLOC_00000043	.	+	0.28	8.1254	0.8508	nan	nan
1	138540	138596	RLOC_00000043	.	+	0.00	nan	nan	nan	nan
1	139344	139487	RLOC_00000043	.	+	0.04	5.4802	0.972	nan	nan
1	138913	138988	RLOC_00000043	.	+	0.04	5.4802	0.972	nan	nan
1	139113	139202	RLOC_00000043	.	+	0.19	-15.5656	0.8033	nan	nan
1	142638	142710	RLOC_00000044	.	+	147.34	-0.0043	0.8865	0.9474	1
1	142280	142423	RLOC_00000044	.	+	218.11	0.0038	0.8834	0.9458	1
1	143675	143760	RLOC_00000045	.	+	2.86	-0.7449	0.6384	nan	0.535
1	143675	143763	RLOC_00000045	.	+	2.54	-0.0782	0.9685	nan	0.535
1	144558	144926	RLOC_00000045	.	+	38.69	0.4428	0.06398	0.2195	0.535
1	143823	143933	RLOC_00000045	.	+	24.69	-0.3554	0.7732	0.8856	0.535
1	145434	146163	RLOC_00000045	.	+	0.10	-9.3791	0.9757	nan	0.535
1	144350	144446	RLOC_00000045	.	+	44.31	0.1863	0.6136	0.7879	0.535
1	145206	145344	RLOC_00000045	.	+	55.09	-0.4258	0.7559	0.8757	0.535
1	145003	145131	RLOC_00000045	.	+	52.54	-0.6351	0.2368	0.4669	0.535
1	143976	144063	RLOC_00000045	.	+	26.74	0.0105	0.9654	0.9847	0.535
1	144226	144314	RLOC_00000045	.	+	35.76	0.1642	0.4334	0.6549	0.535
1	144108	144192	RLOC_00000045	.	+	27.40	0.1075	0.8087	0.9053	0.535
1	147527	147643	RLOC_00000046	.	+	0.19	-8.9922	1	nan	0.987
1	147538	147643	RLOC_00000046	.	+	26.25	-0.1377	0.4656	0.6811	0.987
1	147332	147451	RLOC_00000046	.	+	26.29	0.1488	0.4339	0.6554	0.987
1	148598	154711	RLOC_00000047	.	-	0.07	-8.7485	0.8345	nan	nan
1	149361	155534	RLOC_00000047	.	-	0.04	10.7311	0.8345	nan	nan
1	151297	151392	RLOC_00000048	.	-	0.00	nan	nan	nan	nan
1	152001	152085	RLOC_00000048	.	-	0.00	nan	nan	nan	nan
1	151730	151931	RLOC_00000048	.	-	0.00	nan	nan	nan	nan
1	148598	154711	RLOC_00000050	.	-	0.07	-8.7485	0.8345	nan	nan
1	149361	155534	RLOC_00000050	.	-	0.04	10.7311	0.8345	nan	nan
1	157755	157828	RLOC_00000051	.	-	517.14	-0.1338	0.08032	0.2507	0.5825
1	158111	158253	RLOC_00000051	.	-	685.64	0.1268	0.0758	0.2425	0.5825
1	159991	160078	RLOC_00000052	.	-	119.56	-0.3917	0.04435	0.1767	0.4358
1	160301	160417	RLOC_00000052	.	-	124.33	0.0687	0.4534	0.6712	0.4358
1	162279	162486	RLOC_00000052	.	-	49.21	0.4200	0.07191	0.2351	0.4358
1	160477	160567	RLOC_00000052	.	-	130.12	-0.0036	0.6386	0.8046	0.4358
1	165655	165982	RLOC_00000053	.	+	18.41	-0.7049	0.1189	0.3154	0.6128
1	165655	165768	RLOC_00000053	.	+	29.12	-0.6402	0.1079	0.2979	0.6128
1	164102	164224	RLOC_00000053	.	+	20.99	0.5666	0.08439	0.258	0.6128
1	164134	164224	RLOC_00000053	.	+	14.67	0.8026	0.2409	0.4715	0.6128
1	165379	165448	RLOC_00000053	.	+	45.28	0.0285	0.5837	0.7673	0.6128
1	163515	163933	RLOC_00000053	.	+	55.94	0.2766	0.1904	0.4121	0.6128
1	164685	164770	RLOC_00000053	.	+	65.46	-0.1044	0.7383	0.8658	0.6128
1	157722	170153	RLOC_00000054	.	-	0.08	-9.6731	0.9113	nan	nan
1	164685	164770	RLOC_00000054	.	-	0.27	-11.4652	0.8928	nan	nan
1	161988	176476	RLOC_00000054	.	-	0.04	11.0091	0.8527	nan	nan
1	165249	180554	RLOC_00000054	.	-	0.04	11.0091	0.8527	nan	nan
1	165379	165448	RLOC_00000054	.	-	0.08	11.9290	0.8086	nan	nan
1	166870	167013	RLOC_00000055	.	-	0.76	nan	nan	nan	nan
1	169508	169599	RLOC_00000056	.	+	0.00	nan	nan	nan	nan
1	170759	170850	RLOC_00000056	.	+	0.00	nan	nan	nan	nan
1	168800	169036	RLOC_00000056	.	+	0.00	nan	nan	nan	nan
1	170161	170265	RLOC_00000056	.	+	0.00	nan	nan	nan	nan
1	169256	169346	RLOC_00000056	.	+	0.00	nan	nan	nan	nan
1	169992	170070	RLOC_00000056	.	+	0.00	nan	nan	nan	nan
1	169709	169805	RLOC_00000056	.	+	0.00	nan	nan	nan	nan
1	170506	170621	RLOC_00000056	.	+	0.00	nan	nan	nan	nan
1	170312	170411	RLOC_00000056	.	+	0.00	nan	nan	nan	nan
1	172543	172620	RLOC_00000057	.	-	1534.10	nan	nan	nan	nan
1	172520	172610	RLOC_00000058	.	+	1.03	nan	nan	nan	nan
1	176337	176591	RLOC_00000059	.	+	2.14	-0.2123	0.6062	nan	nan
1	176031	176206	RLOC_00000059	.	+	0.70	11.9143	0.7019	nan	nan
1	176751	177024	RLOC_00000059	.	+	1.88	-0.4534	0.7559	nan	nan
1	182134	182252	RLOC_00000060	.	-	64.14	0.0342	0.8026	0.9021	0.1025
1	180851	181346	RLOC_00000060	.	-	1085.19	-0.1819	0.007475	0.06048	0.1025
1	181421	181593	RLOC_00000060	.	-	1.94	0.3671	0.7996	nan	0.1025
1	181421	182060	RLOC_00000060	.	-	610.34	0.1694	0.005072	0.0478	0.1025
1	186008	186339	RLOC_00000061	.	+	198.77	nan	nan	nan	nan
1	187821	188010	RLOC_00000062	.	+	187.83	0.5340	0.0269	0.1306	0.2258
1	189674	189764	RLOC_00000062	.	+	296.36	-0.2674	0.2983	0.5317	0.2258
1	191474	191578	RLOC_00000062	.	+	93.26	0.0004	0.5161	0.7196	0.2258
1	191888	191966	RLOC_00000062	.	+	143.86	-0.7517	0.1919	0.4141	0.2258
1	189463	189561	RLOC_00000062	.	+	225.63	0.0213	0.5403	0.7373	0.2258
1	188175	188283	RLOC_00000062	.	+	103.07	0.6018	0.01578	0.09488	0.2258
1	189319	189416	RLOC_00000062	.	+	223.89	0.1462	0.2247	0.4534	0.2258
1	188413	188528	RLOC_00000062	.	+	117.70	0.1491	0.3812	0.6099	0.2258
1	192025	192106	RLOC_00000062	.	+	146.46	-0.7378	0.2034	0.4288	0.2258
1	190997	191137	RLOC_00000062	.	+	112.47	0.0244	0.6906	0.837	0.2258
1	190827	190940	RLOC_00000062	.	+	114.92	-0.1391	0.3146	0.548	0.2258
1	191257	191340	RLOC_00000062	.	+	94.30	0.1293	0.8449	0.9251	0.2258
1	191691	191779	RLOC_00000062	.	+	73.58	-0.5013	0.2192	0.4477	0.2258
1	193070	193350	RLOC_00000063	.	-	0.00	nan	nan	nan	nan
1	197421	197500	RLOC_00000064	.	+	344.51	0.2215	0.01866	0.1049	0.2523
1	197670	197774	RLOC_00000064	.	+	451.65	0.0382	0.5781	0.7635	0.2523
1	196541	197114	RLOC_00000064	.	+	418.53	0.0780	0.4804	0.6922	0.2523
1	198182	198266	RLOC_00000064	.	+	511.13	-0.1546	0.1224	0.3207	0.2523
1	197903	197973	RLOC_00000064	.	+	392.99	-0.0430	0.7929	0.8965	0.2523
1	197218	197299	RLOC_00000064	.	+	445.15	-0.1333	0.1696	0.3863	0.2523
1	199958	200510	RLOC_00000065	.	+	1174.12	0.0829	0.03427	0.1512	0.3743
1	199762	199889	RLOC_00000065	.	+	680.73	-0.1008	0.0413	0.1694	0.3743
1	203942	204028	RLOC_00000066	.	+	3.05	-0.0465	0.8246	nan	nan
1	202910	202990	RLOC_00000066	.	+	0.98	-0.0318	0.4119	nan	nan
1	203127	203266	RLOC_00000066	.	+	0.94	-2.5632	0.2764	nan	nan
1	202507	202781	RLOC_00000066	.	+	2.04	-0.0281	0.9225	nan	nan
1	203598	203759	RLOC_00000066	.	+	2.78	1.4408	0.3976	nan	nan
1	207242	207324	RLOC_00000067	.	+	13.89	-0.1278	0.4852	0.6961	0.9973
1	205948	206691	RLOC_00000067	.	+	13.36	0.1288	0.4855	0.6963	0.9973
1	209607	209763	RLOC_00000068	.	+	7.91	0.5273	0.1374	0.3422	0.7544
1	212572	212670	RLOC_00000068	.	+	13.97	-0.7804	0.4015	0.6278	0.7544
1	211378	211473	RLOC_00000068	.	+	12.81	0.1804	0.7242	0.8569	0.7544
1	211716	211854	RLOC_00000068	.	+	6.85	0.3741	0.6517	0.8128	0.7544
1	210143	210384	RLOC_00000068	.	+	8.59	-0.4771	0.7942	0.8971	0.7544
1	210618	211051	RLOC_00000068	.	+	4.22	0.5758	0.331	nan	0.7544
1	209865	209949	RLOC_00000068	.	+	6.37	-0.4413	0.743	nan	0.7544
1	215553	215632	RLOC_00000069	.	+	0.14	-10.7518	0.8715	nan	nan
1	214896	215316	RLOC_00000069	.	+	0.08	12.7227	0.9312	nan	nan
1	214581	214696	RLOC_00000069	.	+	0.14	13.6393	0.756	nan	nan
1	217089	217164	RLOC_00000069	.	+	0.70	2.3322	0.8298	nan	nan
1	215959	216043	RLOC_00000069	.	+	0.67	0.2654	0.9223	nan	nan
1	214405	214479	RLOC_00000069	.	+	0.06	12.3993	0.9332	nan	nan
1	216292	216413	RLOC_00000069	.	+	0.78	-2.3790	0.4941	nan	nan
1	219620	219751	RLOC_00000070	.	+	23.62	nan	nan	nan	nan
1	223095	223550	RLOC_00000071	.	-	372.26	0.4868	1.159e-05	0.001026	0.000157
1	222358	222621	RLOC_00000071	.	-	516.93	-0.4136	5.109e-07	0.0001225	0.000157
1	223865	223944	RLOC_00000071	.	-	405.04	0.0485	0.3506	0.5822	0.000157
1	226080	226170	RLOC_00000072	.	-	5842.15	0.1583	0.108	0.2983	0.03568
1	226310	226395	RLOC_00000072	.	-	7657.98	-0.1321	0.001155	0.01928	0.03568
1	227048	227078	RLOC_00000072	.	-	2.51	-0.3554	0.9526	nan	0.03568
1	226690	226848	RLOC_00000072	.	-	6094.61	0.0786	0.3712	0.601	0.03568
1	229723	229828	RLOC_00000073	.	+	471.33	-0.2333	0.002782	0.03283	0.06631
1	229933	230348	RLOC_00000073	.	+	565.30	0.0213	0.9713	0.9873	0.06631
1	230680	231170	RLOC_00000073	.	+	0.00	nan	nan	nan	0.06631
1	230458	230558	RLOC_00000073	.	+	477.35	0.1105	0.3906	0.618	0.06631
1	229342	229428	RLOC_00000073	.	+	477.11	0.2061	0.1113	0.3033	0.06631
1	231907	232397	RLOC_00000074	.	-	0.66	11.0228	0.6637	nan	0.9934
1	231927	232397	RLOC_00000074	.	-	27.77	0.0825	0.5564	0.7488	0.9934
1	231654	231783	RLOC_00000074	.	-	33.58	-0.1341	0.4624	0.6784	0.9934
1	236547	236672	RLOC_00000075	.	-	54.70	0.9613	0.007442	0.06028	0.004784
1	237302	237503	RLOC_00000075	.	-	0.00	nan	nan	nan	0.004784
1	236295	236428	RLOC_00000075	.	-	86.14	0.7023	0.0008008	0.01547	0.004784
1	233296	233386	RLOC_00000075	.	-	168.39	-0.2345	0.1286	0.3296	0.004784
1	234620	234934	RLOC_00000075	.	-	150.39	0.0244	0.9138	0.9605	0.004784
1	233469	233547	RLOC_00000075	.	-	164.50	-0.3338	0.00129	0.02064	0.004784
1	236026	236144	RLOC_00000075	.	-	85.49	0.3330	0.1689	0.3855	0.004784
1	236783	236864	RLOC_00000075	.	-	82.63	0.9445	0.001585	0.02337	0.004784
1	235359	235717	RLOC_00000075	.	-	108.48	0.1135	0.7616	0.879	0.004784
1	233617	234249	RLOC_00000075	.	-	212.13	-0.4385	6.697e-05	0.003226	0.004784
1	234987	235197	RLOC_00000075	.	-	148.34	0.1050	0.6935	0.8386	0.004784
1	237022	237219	RLOC_00000075	.	-	0.81	12.3702	0.5105	nan	0.004784
1	234391	234528	RLOC_00000075	.	-	163.23	0.0319	0.9193	0.9632	0.004784
1	237022	237503	RLOC_00000075	.	-	111.89	0.2094	0.4042	0.6303	0.004784
1	235751	235844	RLOC_00000075	.	-	113.98	-0.1130	0.5281	0.7285	0.004784
1	241442	241538	RLOC_00000076	.	-	1.48	14.4720	0.1682	nan	1
1	240891	240964	RLOC_00000076	.	-	4.99	-1.4340	0.08355	nan	1
1	241718	241804	RLOC_00000076	.	-	0.68	-1.6811	0.5889	nan	1
1	244634	244769	RLOC_00000076	.	-	2.91	0.5156	0.6368	nan	1
1	243127	243335	RLOC_00000076	.	-	11.60	0.2007	0.8725	0.9399	1
1	245263	245876	RLOC_00000076	.	-	7.07	-0.1353	0.9481	0.977	1
1	240883	240959	RLOC_00000076	.	-	0.00	nan	nan	nan	1
1	245263	245629	RLOC_00000076	.	-	0.00	nan	nan	nan	1
1	241225	241305	RLOC_00000076	.	-	1.02	13.9320	0.1989	nan	1
1	240671	240743	RLOC_00000076	.	-	5.01	-0.9196	0.6964	nan	1
1	241908	241982	RLOC_00000076	.	-	2.10	-3.1577	0.3523	nan	1
1	242112	242213	RLOC_00000076	.	-	1.81	14.7983	0.286	nan	1
1	242289	242448	RLOC_00000076	.	-	1.57	14.5910	0.3043	nan	1
1	244872	245150	RLOC_00000076	.	-	3.78	0.4396	0.802	nan	1
1	243745	244034	RLOC_00000076	.	-	8.39	-0.4677	0.9784	0.9905	1
1	240241	240351	RLOC_00000076	.	-	3.48	-0.9746	0.2752	nan	1
1	244360	244504	RLOC_00000076	.	-	6.57	1.5183	0.05555	nan	1
1	244181	244256	RLOC_00000076	.	-	3.17	1.8453	0.0413	nan	1
1	246852	246948	RLOC_00000077	.	-	0.25	-1.3759	1	nan	nan
1	246607	246730	RLOC_00000077	.	-	1.48	-2.9149	0.9162	nan	nan
1	247077	247166	RLOC_00000077	.	-	0.20	-0.7871	0.9698	nan	nan
1	247491	247576	RLOC_00000077	.	-	0.13	7.0035	0.9329	nan	nan
1	247679	248190	RLOC_00000077	.	-	0.66	0.1102	0.9823	nan	nan
1	247267	247361	RLOC_00000077	.	-	1.03	0.9001	0.7915	nan	nan
1	251593	251679	RLOC_00000078	.	+	27.88	-0.3281	0.419	0.6429	0.04285
1	250862	251003	RLOC_00000078	.	+	23.39	-0.3688	0.474	0.6872	0.04285
1	250587	250668	RLOC_00000078	.	+	26.70	0.9210	0.001503	0.02268	0.04285
1	251065	251142	RLOC_00000078	.	+	30.05	-0.4103	0.281	0.5145	0.04285
1	251826	251921	RLOC_00000078	.	+	28.22	-0.3957	0.6506	0.8123	0.04285
1	249305	249539	RLOC_00000078	.	+	9.04	0.9901	0.2099	0.4365	0.04285
1	250150	250535	RLOC_00000078	.	+	30.49	0.3135	0.2219	0.4508	0.04285
1	251183	251259	RLOC_00000078	.	+	34.25	-0.3725	0.2216	0.4504	0.04285
1	249692	249773	RLOC_00000078	.	+	12.77	0.3955	0.2234	0.4523	0.04285
1	251315	251398	RLOC_00000078	.	+	28.32	0.0295	0.5596	0.751	0.04285
1	252005	252120	RLOC_00000078	.	+	31.56	-0.3955	0.2602	0.4926	0.04285
1	253456	253530	RLOC_00000078	.	+	0.00	nan	nan	nan	0.04285
1	249929	250016	RLOC_00000078	.	+	5.58	0.1793	0.6794	nan	0.04285
1	249929	250013	RLOC_00000078	.	+	5.86	0.6803	0.1616	nan	0.04285
1	249305	249542	RLOC_00000078	.	+	7.06	1.1745	0.1763	0.395	0.04285
1	253873	253953	RLOC_00000078	.	+	0.17	-11.5307	0.5828	nan	0.04285
1	251439	251538	RLOC_00000078	.	+	25.52	0.0229	0.6755	0.8276	0.04285
1	253678	253774	RLOC_00000078	.	+	0.44	-12.9447	0.4434	nan	0.04285
1	255365	257224	RLOC_00000079	.	+	0.59	-8.8421	0.6866	nan	nan
1	255073	255229	RLOC_00000079	.	+	0.15	15.6109	0.6865	nan	nan
1	259093	262872	RLOC_00000081	.	+	0.39	-11.0187	0.7017	nan	0.0001596
1	264159	264279	RLOC_00000081	.	+	165.87	0.2361	0.09884	0.2831	0.0001596
1	266723	267292	RLOC_00000081	.	+	0.00	nan	nan	nan	0.0001596
1	263298	263368	RLOC_00000081	.	+	154.61	0.5434	0.0002409	0.007193	0.0001596
1	263138	263231	RLOC_00000081	.	+	117.02	0.2536	0.286	0.5195	0.0001596
1	263571	263644	RLOC_00000081	.	+	160.40	0.3995	0.02022	0.11	0.0001596
1	263443	263525	RLOC_00000081	.	+	187.46	0.3821	0.004682	0.04546	0.0001596
1	262964	263046	RLOC_00000081	.	+	127.94	0.4668	0.01997	0.1092	0.0001596
1	263769	263856	RLOC_00000081	.	+	151.37	0.2710	0.1345	0.3383	0.0001596
1	264581	264656	RLOC_00000081	.	+	177.30	0.1588	0.2263	0.4552	0.0001596
1	266040	266533	RLOC_00000081	.	+	2.37	-0.9050	0.5848	nan	0.0001596
1	265076	265335	RLOC_00000081	.	+	229.29	-0.1684	0.1596	0.3731	0.0001596
1	266723	267281	RLOC_00000081	.	+	25.20	-0.6138	0.1305	0.3325	0.0001596
1	265844	265951	RLOC_00000081	.	+	218.94	-0.4691	0.01144	0.07836	0.0001596
1	264391	264519	RLOC_00000081	.	+	166.91	0.2155	0.1245	0.3238	0.0001596
1	264711	264796	RLOC_00000081	.	+	165.40	-0.1437	0.3529	0.5844	0.0001596
1	265436	265577	RLOC_00000081	.	+	282.42	-0.6745	7.882e-06	0.0007855	0.0001596
1	263933	264072	RLOC_00000081	.	+	171.43	0.3204	0.09852	0.2826	0.0001596
1	267576	267676	RLOC_00000081	.	+	12.86	-1.0681	0.05867	0.2088	0.0001596
1	265625	265776	RLOC_00000081	.	+	261.10	-0.5555	5.227e-07	0.0001243	0.0001596
1	264900	265020	RLOC_00000081	.	+	168.78	-0.0811	0.5743	0.7609	0.0001596
1	265436	265520	RLOC_00000081	.	+	1.91	2.8321	0.07783	nan	0.0001596
1	260581	260669	RLOC_00000082	.	-	7.11	0.6088	0.2154	0.4431	0.3715
1	260033	260117	RLOC_00000082	.	-	9.01	-1.0638	0.03376	0.1499	0.3715
1	259613	259689	RLOC_00000082	.	-	5.25	-1.0479	0.1815	nan	0.3715
1	260416	260507	RLOC_00000082	.	-	5.13	0.0228	0.4637	nan	0.3715
1	260823	260920	RLOC_00000082	.	-	8.91	0.4909	0.8573	0.9321	0.3715
1	261036	261128	RLOC_00000082	.	-	3.95	1.9268	0.02399	nan	0.3715
1	260602	260669	RLOC_00000082	.	-	0.00	nan	nan	nan	0.3715
1	268629	268716	RLOC_00000084	.	+	411.50	0.1645	0.02317	0.1194	0.244
1	268993	269082	RLOC_00000084	.	+	709.86	-0.1393	0.01772	0.1017	0.244
1	273148	273233	RLOC_00000085	.	-	24.76	0.0060	0.9996	1	0.6948
1	272554	272650	RLOC_00000085	.	-	24.40	-0.1981	0.8333	0.9189	0.6948
1	273338	273428	RLOC_00000085	.	-	15.27	0.2540	0.7616	0.879	0.6948
1	273561	273652	RLOC_00000085	.	-	26.55	0.4191	0.332	0.5648	0.6948
1	274082	274166	RLOC_00000085	.	-	26.28	0.2752	0.4349	0.6563	0.6948
1	274248	274383	RLOC_00000085	.	-	5.89	-1.1350	0.226	nan	0.6948
1	273787	273862	RLOC_00000085	.	-	25.58	0.0772	0.6797	0.83	0.6948
1	272361	272444	RLOC_00000085	.	-	31.89	-0.0373	0.7906	0.8952	0.6948
1	272530	272650	RLOC_00000085	.	-	15.86	-0.1113	0.9345	0.9707	0.6948
1	274082	274170	RLOC_00000085	.	-	7.54	1.2646	0.1185	0.3146	0.6948
1	270089	270621	RLOC_00000085	.	-	335.68	-0.2385	0.1118	0.3043	0.6948
1	272982	273063	RLOC_00000085	.	-	26.09	0.2154	0.6273	0.7972	0.6948
1	274288	274383	RLOC_00000085	.	-	15.70	0.4811	0.2163	0.444	0.6948
1	271288	271378	RLOC_00000086	.	+	206.44	0.1494	0.09154	0.2706	0.6316
1	271432	271540	RLOC_00000086	.	+	214.37	-0.1470	0.09008	0.2681	0.6316
1	275529	275631	RLOC_00000087	.	+	3.34	0.0134	0.6967	nan	1
1	275896	275972	RLOC_00000087	.	+	14.63	-0.0062	0.628	0.7977	1
1	276518	276622	RLOC_00000088	.	-	10.11	0.6564	0.1627	0.3771	0.8016
1	277862	277946	RLOC_00000088	.	-	24.21	0.0859	0.7233	0.8565	0.8016
1	276518	276705	RLOC_00000088	.	-	12.69	0.3905	0.4222	0.6456	0.8016
1	276792	276869	RLOC_00000088	.	-	24.73	-0.1264	0.816	0.9093	0.8016
1	276988	277076	RLOC_00000088	.	-	30.05	0.1164	0.5064	0.7121	0.8016
1	275976	276246	RLOC_00000088	.	-	12.19	-0.6691	0.4044	0.6305	0.8016
1	277152	277231	RLOC_00000088	.	-	23.54	-0.1870	0.7807	0.8898	0.8016
1	277605	277716	RLOC_00000088	.	-	25.69	-0.2071	0.43	0.6519	0.8016
1	277400	277492	RLOC_00000088	.	-	36.98	0.0975	0.7205	0.8548	0.8016
1	278251	278315	RLOC_00000088	.	-	28.79	0.1181	0.5961	0.7755	0.8016
1	276306	276404	RLOC_00000088	.	-	5.84	-0.9334	0.5737	nan	0.8016
1	276432	286223	RLOC_00000089	.	+	0.08	-17.1113	0.8163	nan	nan
1	271432	271540	RLOC_00000089	.	+	0.16	5.4771	0.9164	nan	nan
1	271659	279680	RLOC_00000089	.	+	0.08	4.5312	0.963	nan	nan
1	271659	283420	RLOC_00000089	.	+	0.08	4.5312	0.963	nan	nan
1	281347	281437	RLOC_00000090	.	+	160.93	0.2706	0.06636	0.2244	0.04764
1	280369	280448	RLOC_00000090	.	+	76.56	0.2061	0.3557	0.5869	0.04764
1	280087	280179	RLOC_00000090	.	+	74.66	0.6027	0.0324	0.1461	0.04764
1	280736	280888	RLOC_00000090	.	+	68.94	0.0387	0.8875	0.9478	0.04764
1	283532	283812	RLOC_00000090	.	+	148.31	-0.3822	0.0121	0.08109	0.04764
1	280567	280656	RLOC_00000090	.	+	59.33	-0.0558	0.8553	0.9309	0.04764
1	278808	278886	RLOC_00000090	.	+	91.54	0.1905	0.3489	0.5807	0.04764
1	279087	279165	RLOC_00000090	.	+	59.42	0.4721	0.0543	0.1994	0.04764
1	279424	279535	RLOC_00000090	.	+	85.03	0.2180	0.2624	0.4948	0.04764
1	283052	283131	RLOC_00000090	.	+	220.60	-0.3475	0.1388	0.3442	0.04764
1	279239	279326	RLOC_00000090	.	+	67.84	0.3315	0.119	0.3154	0.04764
1	283230	283313	RLOC_00000090	.	+	198.62	-0.2476	0.0708	0.2329	0.04764
1	283335	283443	RLOC_00000090	.	+	198.01	-0.2109	0.1131	0.3061	0.04764
1	280848	280962	RLOC_00000090	.	+	3.24	-0.0289	0.7296	nan	0.04764
1	282765	282848	RLOC_00000090	.	+	74.41	-1.0528	0.001751	0.02477	0.04764
1	281120	281308	RLOC_00000090	.	+	158.38	0.1780	0.2518	0.4834	0.04764
1	282188	282483	RLOC_00000090	.	+	63.49	-0.0796	0.6454	0.8088	0.04764
1	281535	281758	RLOC_00000090	.	+	105.24	0.6020	0.02081	0.112	0.04764
1	279909	279973	RLOC_00000090	.	+	77.51	0.3733	0.2172	0.4451	0.04764
1	279575	279796	RLOC_00000090	.	+	82.03	0.1185	0.4658	0.6812	0.04764
1	286622	286716	RLOC_00000091	.	+	227.93	0.6216	0.000252	0.007374	0.001355
1	289775	290027	RLOC_00000091	.	+	515.93	-0.1941	0.03872	0.1631	0.001355
1	287132	287220	RLOC_00000091	.	+	234.81	0.5667	0.0003353	0.008837	0.001355
1	286806	286996	RLOC_00000091	.	+	207.68	0.4953	0.002998	0.03442	0.001355
1	286806	286924	RLOC_00000091	.	+	14.87	0.6507	0.2252	0.454	0.001355
1	287513	287641	RLOC_00000091	.	+	294.36	0.1093	0.307	0.5406	0.001355
1	287709	287788	RLOC_00000091	.	+	262.84	0.3059	0.005792	0.05197	0.001355
1	288504	288592	RLOC_00000091	.	+	378.08	0.0145	0.8142	0.9084	0.001355
1	288175	288400	RLOC_00000091	.	+	414.99	0.0711	0.4963	0.7046	0.001355
1	290345	290438	RLOC_00000091	.	+	656.07	-0.5405	5.678e-05	0.002911	0.001355
1	289090	289236	RLOC_00000091	.	+	426.48	0.2619	0.05049	0.1908	0.001355
1	284634	284721	RLOC_00000091	.	+	224.46	1.1260	0.00179	0.02511	0.001355
1	290651	290746	RLOC_00000091	.	+	734.25	-0.5560	7.765e-05	0.003509	0.001355
1	286350	286451	RLOC_00000091	.	+	245.02	0.6878	0.005453	0.04999	0.001355
1	289591	289717	RLOC_00000091	.	+	508.26	-0.0816	0.4625	0.6786	0.001355
1	287853	288086	RLOC_00000091	.	+	272.52	0.4924	0.006905	0.05767	0.001355
1	287279	287394	RLOC_00000091	.	+	359.36	0.3412	0.04207	0.1711	0.001355
1	288720	288881	RLOC_00000091	.	+	433.11	0.1996	0.09208	0.2716	0.001355
1	289385	289538	RLOC_00000091	.	+	436.68	0.0896	0.3018	0.5353	0.001355
1	290093	290169	RLOC_00000091	.	+	602.32	-0.3101	0.003861	0.04048	0.001355
1	290494	290577	RLOC_00000091	.	+	778.17	-0.5323	1.049e-05	0.0009656	0.001355
1	294119	294209	RLOC_00000093	.	+	657.88	-0.0140	0.7886	0.8942	0.4388
1	293751	294054	RLOC_00000093	.	+	520.25	-0.0170	0.6909	0.8372	0.4388
1	293408	293499	RLOC_00000093	.	+	200.03	0.3325	0.04481	0.1776	0.4388
1	294385	294510	RLOC_00000093	.	+	593.95	-0.0658	0.344	0.5761	0.4388
1	293755	294054	RLOC_00000093	.	+	0.13	0.0843	1	nan	0.4388
1	285758	296786	RLOC_00000094	.	+	0.11	nan	nan	nan	nan
1	296247	296361	RLOC_00000095	.	-	965.41	-0.1821	0.1908	0.4127	0.1593
1	297024	297100	RLOC_00000095	.	-	397.43	0.1023	0.4152	0.6399	0.1593
1	296534	296625	RLOC_00000095	.	-	519.93	-0.1098	0.23	0.4595	0.1593
1	296861	296950	RLOC_00000095	.	-	394.47	-0.0507	0.7476	0.871	0.1593
1	297742	298012	RLOC_00000095	.	-	362.86	0.3241	0.009457	0.06985	0.1593
1	296699	296781	RLOC_00000095	.	-	494.67	-0.0910	0.4996	0.7068	0.1593
1	297174	297531	RLOC_00000095	.	-	407.50	0.1814	0.101	0.2869	0.1593
1	300825	301487	RLOC_00000096	.	-	17.67	0.4383	0.1852	0.4055	0.6128
1	300514	300602	RLOC_00000096	.	-	30.73	-0.4147	0.08436	0.258	0.6128
1	301543	302053	RLOC_00000096	.	-	14.38	0.2334	0.5045	0.7106	0.6128
1	300664	300751	RLOC_00000096	.	-	27.00	0.0013	0.6917	0.8377	0.6128
1	305933	306044	RLOC_00000099	.	-	98.70	0.3230	0.06826	0.2281	0.08813
1	304806	304879	RLOC_00000099	.	-	103.96	-0.4393	0.02903	0.1365	0.08813
1	304962	305037	RLOC_00000099	.	-	105.64	0.0053	0.7272	0.8588	0.08813
1	305089	305173	RLOC_00000099	.	-	103.62	0.0520	0.6234	0.7946	0.08813
1	305441	305546	RLOC_00000099	.	-	66.17	0.1251	0.5736	0.7605	0.08813
1	304503	304696	RLOC_00000099	.	-	130.96	-0.5677	0.004138	0.04218	0.08813
1	305701	305784	RLOC_00000099	.	-	60.34	0.5740	0.03469	0.1523	0.08813
1	305257	305346	RLOC_00000099	.	-	94.17	0.1955	0.2641	0.4964	0.08813
1	304503	304696	RLOC_00000100	.	+	1.15	nan	nan	nan	nan
1	308069	308147	RLOC_00000102	.	-	14.46	-0.3147	0.4446	0.6643	0.626
1	308317	308396	RLOC_00000102	.	-	7.47	-1.1295	0.1148	0.309	0.626
1	308572	308796	RLOC_00000102	.	-	10.14	0.6855	0.08835	0.2651	0.626
1	309217	309427	RLOC_00000102	.	-	0.00	nan	nan	nan	0.626
1	308317	308399	RLOC_00000102	.	-	0.00	nan	nan	nan	0.626
1	309012	309111	RLOC_00000102	.	-	0.00	nan	nan	nan	0.626
1	307358	307440	RLOC_00000102	.	-	16.15	0.1506	0.4814	0.693	0.626
1	307804	307888	RLOC_00000102	.	-	22.62	0.0985	0.5634	0.7534	0.626
1	306799	306892	RLOC_00000102	.	-	21.04	-0.0978	0.9179	0.9627	0.626
1	310980	311336	RLOC_00000104	.	+	26.84	nan	nan	nan	nan
1	310362	313677	RLOC_00000105	.	-	0.11	0.0000	1	nan	nan
1	313758	313879	RLOC_00000105	.	-	0.11	-0.0000	1	nan	nan
1	314224	314440	RLOC_00000106	.	-	349.52	0.0282	0.8544	0.9304	0.4689
1	313417	313566	RLOC_00000106	.	-	10.93	-1.6526	0.04997	0.1897	0.4689
1	314801	315576	RLOC_00000106	.	-	0.23	9.9940	0.8547	nan	0.4689
1	315014	315576	RLOC_00000106	.	-	280.83	0.1510	0.2652	0.4975	0.4689
1	313751	313871	RLOC_00000106	.	-	0.00	nan	nan	nan	0.4689
1	313758	313879	RLOC_00000106	.	-	224.72	-0.0256	0.8604	0.9336	0.4689
1	313451	313566	RLOC_00000106	.	-	21.24	0.4356	0.2067	0.4329	0.4689
1	314550	314651	RLOC_00000106	.	-	281.06	-0.1921	0.109	0.2998	0.4689
1	313994	314086	RLOC_00000106	.	-	189.82	0.1647	0.255	0.4869	0.4689
1	314801	314890	RLOC_00000106	.	-	342.39	0.0004	0.9617	0.9828	0.4689
1	314224	314440	RLOC_00000107	.	+	2.18	-1.6994	0.8056	nan	nan
1	313994	314086	RLOC_00000107	.	+	0.41	5.1293	0.7958	nan	nan
1	317192	317293	RLOC_00000108	.	+	77.76	0.1058	0.6305	0.7993	0.5715
1	317844	317978	RLOC_00000108	.	+	94.96	-0.3607	0.1175	0.3133	0.5715
1	317641	317764	RLOC_00000108	.	+	75.76	0.0399	0.9542	0.9797	0.5715
1	316256	316343	RLOC_00000108	.	+	78.44	0.2859	0.3016	0.5351	0.5715
1	318812	318985	RLOC_00000108	.	+	91.57	-0.3440	0.07275	0.2367	0.5715
1	317438	317552	RLOC_00000108	.	+	79.05	0.2117	0.4971	0.7051	0.5715
1	316439	316538	RLOC_00000108	.	+	63.99	0.3868	0.1518	0.363	0.5715
1	318200	318361	RLOC_00000108	.	+	94.97	0.1948	0.2541	0.4859	0.5715
1	316712	316791	RLOC_00000108	.	+	61.78	0.2948	0.1736	0.3915	0.5715
1	316896	317007	RLOC_00000108	.	+	57.27	0.0821	0.6293	0.7984	0.5715
1	318039	318144	RLOC_00000108	.	+	107.79	-0.2780	0.09154	0.2706	0.5715
1	318432	318564	RLOC_00000108	.	+	77.67	0.3338	0.1246	0.3239	0.5715
1	319295	319371	RLOC_00000108	.	+	141.30	-0.2628	0.1967	0.4203	0.5715
1	317393	317552	RLOC_00000108	.	+	0.33	10.8555	0.516	nan	0.5715
1	317455	317560	RLOC_00000108	.	+	0.00	nan	nan	nan	0.5715
1	319100	319203	RLOC_00000108	.	+	125.08	-0.1200	0.5695	0.7578	0.5715
1	317089	317166	RLOC_00000108	.	+	81.87	0.0553	0.7075	0.847	0.5715
1	316439	316522	RLOC_00000108	.	+	4.58	1.4565	0.3473	nan	0.5715
1	318200	318295	RLOC_00000108	.	+	0.00	nan	nan	nan	0.5715
1	320456	320768	RLOC_00000109	.	-	92.33	-0.0413	0.552	0.7456	0.1964
1	321864	321957	RLOC_00000109	.	-	65.21	0.1669	0.6486	0.8109	0.1964
1	320295	320379	RLOC_00000109	.	-	110.32	-0.1881	0.07552	0.242	0.1964
1	320144	320251	RLOC_00000109	.	-	120.63	-0.2019	0.06794	0.2274	0.1964
1	322405	322512	RLOC_00000109	.	-	68.67	0.6041	0.01282	0.08379	0.1964
1	321421	321750	RLOC_00000109	.	-	79.21	0.2830	0.3517	0.5833	0.1964
1	323839	324257	RLOC_00000110	.	+	108.85	0.0955	0.2523	0.4839	0.1309
1	324415	324635	RLOC_00000110	.	+	161.59	-0.5362	0.007148	0.05894	0.1309
1	323083	323207	RLOC_00000110	.	+	44.71	-0.0421	0.7353	0.8638	0.1309
1	323281	323678	RLOC_00000110	.	+	110.83	0.3277	0.01098	0.07638	0.1309
1	328321	328423	RLOC_00000111	.	+	48.63	0.1108	0.5508	0.7447	0.01692
1	329029	329118	RLOC_00000111	.	+	81.50	0.2680	0.1188	0.3151	0.01692
1	327385	327487	RLOC_00000111	.	+	40.56	0.7092	0.02676	0.1301	0.01692
1	329210	329310	RLOC_00000111	.	+	80.79	-0.0064	0.8639	0.9353	0.01692
1	328733	328883	RLOC_00000111	.	+	0.00	nan	nan	nan	0.01692
1	328503	328897	RLOC_00000111	.	+	0.00	nan	nan	nan	0.01692
1	326227	326331	RLOC_00000111	.	+	43.69	0.8578	0.0004067	0.01001	0.01692
1	326814	326930	RLOC_00000111	.	+	27.17	-0.0485	0.7478	0.871	0.01692
1	330154	330242	RLOC_00000111	.	+	105.79	-0.6786	0.0007161	0.01442	0.01692
1	327865	327999	RLOC_00000111	.	+	71.55	0.0973	0.6483	0.8107	0.01692
1	325640	325912	RLOC_00000111	.	+	33.94	0.0961	0.5543	0.7471	0.01692
1	328554	328685	RLOC_00000111	.	+	0.00	nan	nan	nan	0.01692
1	326516	326593	RLOC_00000111	.	+	54.92	0.3050	0.1827	0.4025	0.01692
1	329697	329780	RLOC_00000111	.	+	104.57	-0.2899	0.1125	0.3052	0.01692
1	327575	327662	RLOC_00000111	.	+	41.66	0.0632	0.9874	0.9945	0.01692
1	327083	327236	RLOC_00000111	.	+	62.81	-0.0789	0.8792	0.9435	0.01692
1	328554	328897	RLOC_00000111	.	+	84.62	0.2166	0.2533	0.485	0.01692
1	329923	330026	RLOC_00000111	.	+	166.57	-0.3027	0.1193	0.3161	0.01692
1	329435	329572	RLOC_00000111	.	+	94.58	-0.0236	0.8332	0.9189	0.01692
1	328106	328187	RLOC_00000111	.	+	84.07	-0.0053	0.7116	0.8494	0.01692
1	326012	326105	RLOC_00000111	.	+	35.37	-0.1543	0.8115	0.907	0.01692
1	332182	332275	RLOC_00000112	.	-	168.92	-0.1930	0.4163	0.6409	0.04359
1	336232	336416	RLOC_00000112	.	-	92.54	0.1421	0.1185	0.3148	0.04359
1	334177	334470	RLOC_00000112	.	-	87.83	0.2304	0.06435	0.2202	0.04359
1	333627	333904	RLOC_00000112	.	-	130.13	0.0932	0.3148	0.5481	0.04359
1	332632	332723	RLOC_00000112	.	-	150.87	0.1068	0.4263	0.6487	0.04359
1	333044	333128	RLOC_00000112	.	-	160.62	-0.5384	0.002154	0.02818	0.04359
1	335772	335915	RLOC_00000112	.	-	95.27	0.6231	0.001538	0.02298	0.04359
1	335320	335418	RLOC_00000112	.	-	83.80	0.3052	0.1492	0.3592	0.04359
1	331422	331533	RLOC_00000112	.	-	228.13	-0.2275	0.147	0.3559	0.04359
1	334762	334898	RLOC_00000112	.	-	86.12	-0.1523	0.8826	0.9454	0.04359
1	338986	339125	RLOC_00000113	.	+	141.70	nan	nan	nan	nan
1	333471	343400	RLOC_00000114	.	-	0.08	0.3253	1	nan	nan
1	330974	341314	RLOC_00000114	.	-	0.13	-0.2725	1	nan	nan
1	333471	343400	RLOC_00000115	.	-	0.08	-11.6727	0.7895	nan	nan
1	343239	343435	RLOC_00000115	.	-	0.26	-1.0010	0.9322	nan	nan
1	343803	358102	RLOC_00000115	.	-	0.08	8.9244	0.9492	nan	nan
1	343729	343817	RLOC_00000115	.	-	0.12	9.7041	0.8349	nan	nan
1	339740	346035	RLOC_00000116	.	+	0.10	nan	nan	nan	nan
1	348266	348372	RLOC_00000117	.	+	25.66	0.6086	0.08043	0.2508	0.06471
1	351631	351728	RLOC_00000117	.	+	49.38	-0.5334	0.2441	0.4753	0.06471
1	349885	350048	RLOC_00000117	.	+	34.09	0.6038	0.1234	0.322	0.06471
1	348126	348211	RLOC_00000117	.	+	25.21	0.3594	0.1671	0.3831	0.06471
1	352000	352125	RLOC_00000117	.	+	62.44	-0.5258	0.01215	0.08123	0.06471
1	348453	348561	RLOC_00000117	.	+	31.93	0.9026	0.01729	0.1002	0.06471
1	348784	348879	RLOC_00000117	.	+	28.92	0.3282	0.152	0.3632	0.06471
1	351818	351911	RLOC_00000117	.	+	57.97	-0.8670	0.002689	0.03216	0.06471
1	348975	349066	RLOC_00000117	.	+	30.31	0.3646	0.2158	0.4435	0.06471
1	349365	349549	RLOC_00000117	.	+	24.45	1.0471	0.003228	0.03608	0.06471
1	350782	350870	RLOC_00000117	.	+	54.35	-0.1040	0.7547	0.875	0.06471
1	351328	351411	RLOC_00000117	.	+	75.72	-0.2228	0.1528	0.3643	0.06471
1	349098	349237	RLOC_00000117	.	+	30.42	0.6425	0.04756	0.1842	0.06471
1	348639	348734	RLOC_00000117	.	+	25.91	1.1190	0.006563	0.05592	0.06471
1	350146	350225	RLOC_00000117	.	+	41.66	0.8264	0.04452	0.177	0.06471
1	349719	349802	RLOC_00000117	.	+	41.80	-0.1176	0.5971	0.7763	0.06471
1	350295	350473	RLOC_00000117	.	+	53.33	-0.1599	0.5135	0.7175	0.06471
1	350965	351043	RLOC_00000117	.	+	68.35	-0.2095	0.5332	0.7324	0.06471
1	351159	351251	RLOC_00000117	.	+	60.10	0.0455	0.9007	0.9542	0.06471
1	351600	351736	RLOC_00000117	.	+	0.00	nan	nan	nan	0.06471
1	350569	350657	RLOC_00000117	.	+	57.56	-0.2741	0.3407	0.5731	0.06471
1	352317	352845	RLOC_00000117	.	+	0.46	2.3054	0.498	nan	0.06471
1	353161	353237	RLOC_00000118	.	-	122.37	-0.1984	0.1369	0.3416	0.7536
1	353511	353621	RLOC_00000118	.	-	3.80	1.0892	0.2349	nan	0.7536
1	354120	354212	RLOC_00000118	.	-	13.84	0.2042	0.2787	0.5121	0.7536
1	360768	360891	RLOC_00000119	.	-	37.48	0.1776	0.3664	0.597	0.9673
1	360442	360722	RLOC_00000119	.	-	25.65	-0.1608	0.575	0.7614	0.9673
1	360148	360239	RLOC_00000119	.	-	49.75	-0.0798	0.654	0.8143	0.9673
1	360442	360852	RLOC_00000119	.	-	0.00	nan	nan	nan	0.9673
1	366858	366985	RLOC_00000120	.	+	14.84	0.3433	0.4149	0.6397	0.9816
1	366324	366722	RLOC_00000120	.	+	13.29	-0.3636	0.4204	0.6441	0.9816
1	370750	370858	RLOC_00000122	.	-	3.57	nan	nan	nan	nan
1	372288	376422	RLOC_00000123	.	+	0.08	-0.0000	1	nan	nan
1	376473	376561	RLOC_00000123	.	+	0.08	0.0000	1	nan	nan
1	384839	384907	RLOC_00000124	.	+	336.62	-0.2643	0.04186	0.1707	0.004292
1	380002	380085	RLOC_00000124	.	+	13.63	0.2585	0.2522	0.4839	0.004292
1	376814	376924	RLOC_00000124	.	+	61.36	0.8195	0.0006471	0.01345	0.004292
1	382928	383029	RLOC_00000124	.	+	154.42	-0.1046	0.83	0.9171	0.004292
1	383687	384083	RLOC_00000124	.	+	143.95	-0.0514	0.9728	0.988	0.004292
1	374499	374582	RLOC_00000124	.	+	53.74	0.4245	0.04251	0.1723	0.004292
1	378035	378118	RLOC_00000124	.	+	95.16	0.3670	0.01277	0.08367	0.004292
1	385816	385908	RLOC_00000124	.	+	225.99	-0.6631	0.002618	0.03168	0.004292
1	385323	385431	RLOC_00000124	.	+	193.22	-0.1264	0.5094	0.7141	0.004292
1	373404	373605	RLOC_00000124	.	+	0.00	nan	nan	nan	0.004292
1	380374	380601	RLOC_00000124	.	+	121.31	0.1194	0.1251	0.3246	0.004292
1	380002	380088	RLOC_00000124	.	+	94.86	0.3697	0.009096	0.06818	0.004292
1	378364	378503	RLOC_00000124	.	+	76.26	0.8406	0.002335	0.0296	0.004292
1	385622	385712	RLOC_00000124	.	+	235.92	-0.6463	0.0009934	0.01763	0.004292
1	380997	381149	RLOC_00000124	.	+	99.44	0.1830	0.1075	0.2973	0.004292
1	384229	384317	RLOC_00000124	.	+	168.11	-0.3281	0.04373	0.1751	0.004292
1	373785	373891	RLOC_00000124	.	+	64.44	0.0503	0.1101	0.3016	0.004292
1	379229	379304	RLOC_00000124	.	+	117.65	0.5796	0.00219	0.02845	0.004292
1	380173	380269	RLOC_00000124	.	+	99.24	0.2544	0.02249	0.1174	0.004292
1	381633	381729	RLOC_00000124	.	+	161.74	-0.3023	0.1262	0.326	0.004292
1	383528	383607	RLOC_00000124	.	+	142.76	-0.1034	0.7214	0.8552	0.004292
1	381331	381404	RLOC_00000124	.	+	123.36	0.0051	0.5771	0.7627	0.004292
1	374921	375124	RLOC_00000124	.	+	59.78	1.0941	0.0005538	0.01221	0.004292
1	374188	374271	RLOC_00000124	.	+	60.42	0.2147	0.09228	0.2719	0.004292
1	379769	379865	RLOC_00000124	.	+	98.31	0.2201	0.1546	0.3666	0.004292
1	386332	386427	RLOC_00000124	.	+	326.49	-0.6286	0.001275	0.0205	0.004292
1	386042	386132	RLOC_00000124	.	+	238.51	-0.9631	5.707e-05	0.002919	0.004292
1	374921	375121	RLOC_00000124	.	+	5.16	-0.7048	0.6716	nan	0.004292
1	381831	381911	RLOC_00000124	.	+	144.99	-0.3241	0.1213	0.3189	0.004292
1	375237	375324	RLOC_00000124	.	+	64.59	0.4437	0.06687	0.2254	0.004292
1	378853	378942	RLOC_00000124	.	+	70.37	0.5760	0.0002022	0.006442	0.004292
1	377027	377210	RLOC_00000124	.	+	96.42	0.4194	0.03209	0.1452	0.004292
1	380696	380845	RLOC_00000124	.	+	113.20	0.1098	0.1034	0.291	0.004292
1	382039	382126	RLOC_00000124	.	+	135.82	-0.0360	0.3967	0.6238	0.004292
1	375718	375807	RLOC_00000124	.	+	74.64	0.4839	0.04563	0.1796	0.004292
1	376473	376561	RLOC_00000124	.	+	46.49	0.5857	0.007941	0.06282	0.004292
1	384968	385170	RLOC_00000124	.	+	288.88	-0.2934	0.07942	0.2491	0.004292
1	379088	379182	RLOC_00000124	.	+	113.13	0.4531	0.0006939	0.01413	0.004292
1	379432	379527	RLOC_00000124	.	+	94.05	0.3280	0.09694	0.28	0.004292
1	375452	375527	RLOC_00000124	.	+	63.53	0.9337	0.0002459	0.007269	0.004292
1	377614	377880	RLOC_00000124	.	+	90.63	0.2211	0.04489	0.1779	0.004292
1	378190	378297	RLOC_00000124	.	+	82.23	0.7158	0.002742	0.03252	0.004292
1	384448	384557	RLOC_00000124	.	+	116.51	-0.1749	0.4639	0.6797	0.004292
1	378648	378745	RLOC_00000124	.	+	65.61	0.3748	0.2244	0.4532	0.004292
1	382566	382802	RLOC_00000124	.	+	111.99	0.2042	0.2471	0.4785	0.004292
1	383129	383394	RLOC_00000124	.	+	136.99	0.2818	0.1426	0.3494	0.004292
1	384604	384693	RLOC_00000124	.	+	159.59	-0.1231	0.6241	0.7951	0.004292
1	377304	377390	RLOC_00000124	.	+	93.40	0.0644	0.1578	0.3707	0.004292
1	382170	382372	RLOC_00000124	.	+	146.94	-0.0462	0.7009	0.8432	0.004292
1	376250	376351	RLOC_00000124	.	+	58.46	0.3154	0.07656	0.2438	0.004292
1	376001	376113	RLOC_00000124	.	+	50.65	0.2601	0.1698	0.3866	0.004292
1	388759	388850	RLOC_00000125	.	-	222.25	0.3930	0.001057	0.01826	0.03348
1	389300	389409	RLOC_00000125	.	-	236.00	0.2719	0.07516	0.2413	0.03348
1	388405	388538	RLOC_00000125	.	-	365.69	-0.1170	0.2498	0.4815	0.03348
1	388939	389049	RLOC_00000125	.	-	273.94	-0.0052	0.7131	0.8503	0.03348
1	387502	387583	RLOC_00000125	.	-	402.97	-0.3546	0.007415	0.06019	0.03348
1	389137	389225	RLOC_00000125	.	-	270.39	0.0893	0.368	0.5984	0.03348
1	387654	388267	RLOC_00000125	.	-	71.32	-0.3847	0.235	0.4648	0.03348
1	387671	388267	RLOC_00000125	.	-	251.79	-0.3142	0.07019	0.2318	0.03348
1	388608	388715	RLOC_00000125	.	-	250.76	0.1898	0.06289	0.2172	0.03348
1	392299	392373	RLOC_00000126	.	+	294.94	-0.3988	0.004418	0.04394	0.007673
1	392169	392261	RLOC_00000126	.	+	15.62	0.1400	0.8105	0.9063	0.007673
1	398525	398613	RLOC_00000126	.	+	204.39	0.1462	0.2465	0.4779	0.007673
1	392494	392575	RLOC_00000126	.	+	315.76	-0.5705	0.0002364	0.007105	0.007673
1	398345	398459	RLOC_00000126	.	+	276.92	0.4659	0.0001369	0.004987	0.007673
1	396216	396290	RLOC_00000126	.	+	234.11	0.4974	0.0002882	0.00804	0.007673
1	395945	396028	RLOC_00000126	.	+	219.67	0.2043	0.1332	0.3364	0.007673
1	390563	390761	RLOC_00000126	.	+	255.61	-0.0561	0.7936	0.8967	0.007673
1	397097	397702	RLOC_00000126	.	+	194.14	0.1768	0.2099	0.4365	0.007673
1	390249	390351	RLOC_00000126	.	+	233.85	-0.1324	0.3992	0.6258	0.007673
1	398150	398291	RLOC_00000126	.	+	289.00	0.4922	0.0005849	0.01263	0.007673
1	390249	390318	RLOC_00000126	.	+	8.46	-0.4581	0.7794	0.8892	0.007673
1	399109	399181	RLOC_00000126	.	+	391.75	-0.1416	0.243	0.4739	0.007673
1	393874	393965	RLOC_00000126	.	+	105.71	0.2744	0.1819	0.4017	0.007673
1	394152	394227	RLOC_00000126	.	+	106.73	-0.1685	0.517	0.7203	0.007673
1	391715	392020	RLOC_00000126	.	+	269.83	-0.2112	0.3437	0.5759	0.007673
1	396724	396792	RLOC_00000126	.	+	374.08	0.0932	0.3497	0.5815	0.007673
1	391262	391457	RLOC_00000126	.	+	227.68	-0.3399	0.008751	0.06658	0.007673
1	390398	390482	RLOC_00000126	.	+	275.72	-0.1034	0.5624	0.7528	0.007673
1	397742	397876	RLOC_00000126	.	+	232.62	0.0348	0.741	0.8673	0.007673
1	398965	399067	RLOC_00000126	.	+	452.86	-0.1848	0.1261	0.3259	0.007673
1	392075	392261	RLOC_00000126	.	+	0.00	nan	nan	nan	0.007673
1	396862	396940	RLOC_00000126	.	+	274.08	0.2039	0.1253	0.3248	0.007673
1	390863	391002	RLOC_00000126	.	+	192.66	-0.2674	0.3378	0.5703	0.007673
1	396355	396438	RLOC_00000126	.	+	242.05	0.4798	0.000928	0.0169	0.007673
1	392071	392261	RLOC_00000126	.	+	273.05	-0.3008	0.08574	0.2604	0.007673
1	396087	396166	RLOC_00000126	.	+	205.29	0.3336	0.04128	0.1694	0.007673
1	398712	398904	RLOC_00000126	.	+	343.65	-0.2353	0.04309	0.1736	0.007673
1	399392	399483	RLOC_00000126	.	+	464.39	-0.1978	0.1215	0.3192	0.007673
1	391540	391651	RLOC_00000126	.	+	235.01	-0.2626	0.0918	0.2711	0.007673
1	389942	390036	RLOC_00000126	.	+	209.83	0.3644	0.01397	0.08818	0.007673
1	391122	391215	RLOC_00000126	.	+	219.82	-0.2673	0.1041	0.2918	0.007673
1	394450	394671	RLOC_00000126	.	+	154.24	-0.4831	0.06229	0.2161	0.007673
1	397963	398064	RLOC_00000126	.	+	302.41	0.2553	0.01277	0.08368	0.007673
1	398712	399010	RLOC_00000126	.	+	13.44	-0.4478	0.9014	0.9545	0.007673
1	396533	396608	RLOC_00000126	.	+	296.85	0.3337	0.01047	0.07428	0.007673
1	401369	401460	RLOC_00000127	.	-	444.29	-0.0646	0.3911	0.6185	0.9661
1	400445	400724	RLOC_00000127	.	-	534.07	-0.0399	0.6829	0.8323	0.9661
1	401085	401163	RLOC_00000127	.	-	466.78	0.0536	0.5041	0.7103	0.9661
1	400827	400930	RLOC_00000127	.	-	610.55	0.0598	0.471	0.6848	0.9661
1	401507	401594	RLOC_00000127	.	-	437.56	-0.0587	0.5018	0.7084	0.9661
1	401234	401322	RLOC_00000127	.	-	411.18	0.0817	0.3626	0.5933	0.9661
1	401666	401774	RLOC_00000127	.	-	256.28	-0.0394	0.5766	0.7624	0.9661
1	395846	408878	RLOC_00000128	.	+	0.08	-8.9184	0.9132	nan	nan
1	399446	416958	RLOC_00000128	.	+	0.41	-11.2851	0.8932	nan	nan
1	398788	408126	RLOC_00000128	.	+	0.04	14.1584	0.8352	nan	nan
1	408137	408235	RLOC_00000128	.	+	0.04	14.1584	0.8352	nan	nan
1	408328	408407	RLOC_00000128	.	+	0.04	14.1584	0.8352	nan	nan
1	402807	402885	RLOC_00000129	.	-	0.00	nan	nan	nan	nan
1	403946	404185	RLOC_00000130	.	-	1548.85	0.0813	0.3886	0.6161	0.974
1	403525	403770	RLOC_00000130	.	-	1327.63	-0.0830	0.3912	0.6185	0.974
1	405109	405229	RLOC_00000131	.	+	79.12	0.5346	0.03425	0.1511	0.0138
1	404668	404756	RLOC_00000131	.	+	56.88	0.6983	0.03427	0.1512	0.0138
1	406988	407079	RLOC_00000131	.	+	89.13	0.8261	0.006633	0.0563	0.0138
1	412789	412882	RLOC_00000131	.	+	167.10	-0.5320	0.004682	0.04546	0.0138
1	407820	408072	RLOC_00000131	.	+	200.30	-0.3772	0.1258	0.3254	0.0138
1	405315	405429	RLOC_00000131	.	+	62.88	0.8455	0.002255	0.02899	0.0138
1	404952	405064	RLOC_00000131	.	+	82.23	0.3014	0.3158	0.5491	0.0138
1	411252	411335	RLOC_00000131	.	+	305.96	0.1529	0.1043	0.2922	0.0138
1	407549	407721	RLOC_00000131	.	+	143.61	-0.0103	0.7391	0.8663	0.0138
1	405484	405647	RLOC_00000131	.	+	65.75	0.5020	0.01641	0.09716	0.0138
1	408328	408407	RLOC_00000131	.	+	188.33	-0.6445	0.00169	0.02428	0.0138
1	406517	407534	RLOC_00000131	.	+	0.00	nan	nan	nan	0.0138
1	410892	411176	RLOC_00000131	.	+	467.94	-0.0810	0.6912	0.8374	0.0138
1	406309	406414	RLOC_00000131	.	+	69.84	0.5066	0.03557	0.1545	0.0138
1	405764	405892	RLOC_00000131	.	+	100.61	0.0409	0.7452	0.8697	0.0138
1	413294	413366	RLOC_00000131	.	+	297.65	-0.9938	0.0003087	0.008403	0.0138
1	406791	406902	RLOC_00000131	.	+	110.01	0.2722	0.1635	0.3782	0.0138
1	404841	404911	RLOC_00000131	.	+	100.61	0.3832	0.165	0.3804	0.0138
1	413002	413079	RLOC_00000131	.	+	249.87	-0.3111	0.1225	0.3207	0.0138
1	405109	405241	RLOC_00000131	.	+	0.24	10.6964	0.8104	nan	0.0138
1	408137	408235	RLOC_00000131	.	+	216.37	-0.4682	0.03352	0.1492	0.0138
1	409137	409218	RLOC_00000131	.	+	464.43	0.1751	0.1084	0.2989	0.0138
1	412257	412459	RLOC_00000131	.	+	100.03	0.2911	0.1635	0.3783	0.0138
1	407388	407467	RLOC_00000131	.	+	111.04	0.0657	0.5073	0.7129	0.0138
1	405950	406060	RLOC_00000131	.	+	129.05	0.0460	0.6731	0.8262	0.0138
1	406131	406246	RLOC_00000131	.	+	127.46	0.0795	0.6462	0.8093	0.0138
1	407146	407320	RLOC_00000131	.	+	99.96	0.3880	0.03467	0.1522	0.0138
1	406517	406720	RLOC_00000131	.	+	95.57	0.1057	0.477	0.6896	0.0138
1	414216	414423	RLOC_00000132	.	-	29.96	nan	nan	nan	nan
1	417161	417247	RLOC_00000133	.	+	6.13	0.3442	0.5487	nan	nan
1	416434	416742	RLOC_00000133	.	+	0.00	nan	nan	nan	nan
1	416434	416730	RLOC_00000133	.	+	0.60	-0.5062	0.945	nan	nan
1	416837	416961	RLOC_00000133	.	+	1.29	1.7046	0.5193	nan	nan
1	415960	416044	RLOC_00000133	.	+	0.74	-1.5968	0.9653	nan	nan
1	417519	417622	RLOC_00000133	.	+	2.37	-1.0655	0.1983	nan	nan
1	415669	415741	RLOC_00000133	.	+	0.08	10.0340	0.835	nan	nan
1	419528	419674	RLOC_00000134	.	+	206.59	0.4712	0.02164	0.1147	1.903e-12
1	421632	421719	RLOC_00000134	.	+	1.17	-3.2789	0.07272	nan	1.903e-12
1	421390	421525	RLOC_00000134	.	+	315.33	-0.1904	0.02314	0.1193	1.903e-12
1	418876	418986	RLOC_00000134	.	+	205.24	1.3758	3.084e-16	1.302e-12	1.903e-12
1	421907	421980	RLOC_00000134	.	+	536.14	-0.6302	1.189e-05	0.001037	1.903e-12
1	421632	421734	RLOC_00000134	.	+	357.54	-0.3657	0.004016	0.04142	1.903e-12
1	421090	421190	RLOC_00000134	.	+	392.93	-0.2808	0.006563	0.05592	1.903e-12
1	419209	419296	RLOC_00000134	.	+	304.63	1.1392	5.009e-08	2.284e-05	1.903e-12
1	419893	420513	RLOC_00000134	.	+	277.79	0.1332	0.4175	0.6417	1.903e-12
1	420888	420983	RLOC_00000134	.	+	325.43	-0.2732	0.007855	0.06237	1.903e-12
1	429369	429461	RLOC_00000137	.	-	15.00	0.0098	0.8196	0.9113	0.9191
1	430315	430413	RLOC_00000137	.	-	11.13	-0.2719	0.4346	0.6561	0.9191
1	429098	429247	RLOC_00000137	.	-	19.43	0.1675	0.3711	0.6009	0.9191
1	429775	429850	RLOC_00000137	.	-	15.01	-0.2929	0.3438	0.576	0.9191
1	429996	430068	RLOC_00000137	.	-	15.53	0.3827	0.2716	0.5045	0.9191
1	436127	436276	RLOC_00000139	.	-	3.28	0.0910	1	nan	nan
1	435322	435449	RLOC_00000139	.	-	1.13	9.0254	0.7085	nan	nan
1	436538	436621	RLOC_00000139	.	-	0.67	-2.8496	0.3609	nan	nan
1	435562	435649	RLOC_00000139	.	-	3.60	10.6914	0.3789	nan	nan
1	435915	435996	RLOC_00000139	.	-	0.80	-2.5717	0.316	nan	nan
1	439313	439405	RLOC_00000140	.	-	0.00	nan	nan	nan	nan
1	438678	438782	RLOC_00000140	.	-	0.00	nan	nan	nan	nan
1	438922	439051	RLOC_00000140	.	-	0.00	nan	nan	nan	nan
1	438333	438421	RLOC_00000140	.	-	0.00	nan	nan	nan	nan
1	438105	438217	RLOC_00000140	.	-	0.27	nan	nan	nan	nan
1	442619	442717	RLOC_00000141	.	-	24.47	0.6599	0.04362	0.1749	0.3683
1	441012	441135	RLOC_00000141	.	-	76.64	0.0916	0.3548	0.5861	0.3683
1	441324	441397	RLOC_00000141	.	-	69.18	-0.5575	0.03331	0.1487	0.3683
1	442619	442803	RLOC_00000141	.	-	0.73	0.9973	0.9413	nan	0.3683
1	445751	445843	RLOC_00000142	.	-	127.75	0.0072	0.7759	0.8871	0.01468
1	444382	444488	RLOC_00000142	.	-	126.09	-0.4768	0.04762	0.1843	0.01468
1	445941	446029	RLOC_00000142	.	-	122.41	0.5261	0.01642	0.09719	0.01468
1	443524	443628	RLOC_00000142	.	-	160.24	-0.4876	0.01407	0.08856	0.01468
1	445065	445453	RLOC_00000142	.	-	135.10	0.4978	0.0003352	0.008837	0.01468
1	444596	444682	RLOC_00000142	.	-	105.15	0.1428	0.3559	0.5871	0.01468
1	444088	444257	RLOC_00000142	.	-	133.67	0.0876	0.5652	0.7546	0.01468
1	445558	445647	RLOC_00000142	.	-	99.37	-0.0364	0.8936	0.951	0.01468
1	444758	444845	RLOC_00000142	.	-	97.26	0.0144	0.8425	0.9241	0.01468
1	443735	443978	RLOC_00000142	.	-	132.10	-0.3600	0.05889	0.2092	0.01468
1	452065	452582	RLOC_00000143	.	-	32.01	0.6084	0.1386	0.3438	0.107
1	450250	450360	RLOC_00000143	.	-	45.53	0.4674	0.1722	0.3898	0.107
1	450257	450360	RLOC_00000143	.	-	290.19	0.1809	0.1561	0.3686	0.107
1	449837	449938	RLOC_00000143	.	-	373.86	0.3122	0.008466	0.06519	0.107
1	448732	448811	RLOC_00000143	.	-	420.84	-0.4696	0.005382	0.04968	0.107
1	449122	449224	RLOC_00000143	.	-	608.01	-0.1175	0.357	0.5882	0.107
1	448972	449054	RLOC_00000143	.	-	678.32	-0.2643	0.05392	0.1986	0.107
1	449488	449713	RLOC_00000143	.	-	352.90	0.2105	0.06062	0.2128	0.107
1	450045	450150	RLOC_00000143	.	-	540.03	0.0886	0.2981	0.5315	0.107
1	453364	453593	RLOC_00000144	.	+	84.65	0.3564	0.2834	0.517	0.09431
1	454062	454169	RLOC_00000144	.	+	35.32	-0.1320	0.6295	0.7986	0.09431
1	454062	454196	RLOC_00000144	.	+	0.00	nan	nan	nan	0.09431
1	454335	454414	RLOC_00000144	.	+	131.58	0.3345	0.1206	0.3178	0.09431
1	455146	455241	RLOC_00000144	.	+	305.07	-0.3190	0.004533	0.04455	0.09431
1	455039	455111	RLOC_00000144	.	+	244.51	-0.2644	0.0166	0.0979	0.09431
1	453646	453729	RLOC_00000144	.	+	73.49	0.2241	0.4467	0.6659	0.09431
1	454062	454314	RLOC_00000144	.	+	1.16	12.3084	0.09746	nan	0.09431
1	454839	454926	RLOC_00000144	.	+	182.84	0.2086	0.219	0.4474	0.09431
1	453809	453906	RLOC_00000144	.	+	90.34	0.2914	0.1786	0.3977	0.09431
1	454539	454621	RLOC_00000144	.	+	202.94	0.1620	0.2315	0.461	0.09431
1	454062	454414	RLOC_00000144	.	+	0.00	nan	nan	nan	0.09431
1	456760	456842	RLOC_00000145	.	+	387.77	0.1458	0.08697	0.2626	0.003415
1	456645	456842	RLOC_00000145	.	+	0.85	-0.2759	0.8153	nan	0.003415
1	457626	457715	RLOC_00000145	.	+	1124.00	-0.4050	0.0004106	0.01005	0.003415
1	456230	456313	RLOC_00000145	.	+	373.09	0.4348	0.0008095	0.01557	0.003415
1	457428	457513	RLOC_00000145	.	+	757.32	-0.1790	0.1865	0.4073	0.003415
1	455901	456177	RLOC_00000145	.	+	660.91	0.3934	4.112e-05	0.00235	0.003415
1	458085	458169	RLOC_00000145	.	+	0.00	nan	nan	nan	0.003415
1	456645	456756	RLOC_00000145	.	+	418.23	0.1408	0.1299	0.3317	0.003415
1	457750	457839	RLOC_00000145	.	+	1048.69	-0.4044	0.001541	0.02301	0.003415
1	457134	457210	RLOC_00000145	.	+	866.81	-0.2027	0.1222	0.3202	0.003415
1	456916	457009	RLOC_00000145	.	+	534.34	0.2089	0.01405	0.08845	0.003415
1	456393	456489	RLOC_00000145	.	+	551.78	0.2878	0.006522	0.05572	0.003415
1	455901	456177	RLOC_00000146	.	-	3.02	-1.3831	1	nan	nan
1	456230	456313	RLOC_00000146	.	-	0.08	7.3020	1	nan	nan
1	459142	459502	RLOC_00000147	.	-	5.00	-0.1443	0.7385	nan	nan
1	458939	459020	RLOC_00000147	.	-	4.61	-0.2972	0.6178	nan	nan
1	458635	458731	RLOC_00000147	.	-	4.89	0.7774	0.4818	nan	nan
1	459681	460322	RLOC_00000147	.	-	5.39	-0.3253	0.9565	nan	nan
1	458097	469131	RLOC_00000148	.	+	0.13	nan	nan	nan	nan
1	460635	461770	RLOC_00000149	.	+	0.08	nan	nan	nan	nan
1	467085	467185	RLOC_00000150	.	-	813.37	0.2386	0.03412	0.1508	0.1121
1	466796	466957	RLOC_00000150	.	-	1367.12	0.0115	0.9108	0.9591	0.1121
1	466246	466731	RLOC_00000150	.	-	1519.23	-0.0387	0.4837	0.6948	0.1121
1	462382	462474	RLOC_00000150	.	-	231.64	-0.6192	0.005737	0.05163	0.1121
1	467551	467683	RLOC_00000150	.	-	1411.34	0.2154	0.07243	0.2361	0.1121
1	462799	462875	RLOC_00000150	.	-	241.69	-0.0958	0.5832	0.767	0.1121
1	462631	462726	RLOC_00000150	.	-	205.46	-0.0818	0.678	0.8291	0.1121
1	463619	463711	RLOC_00000150	.	-	2.74	1.1346	0.7011	nan	0.1121
1	464522	464761	RLOC_00000150	.	-	85.43	-1.1235	0.01076	0.07543	0.1121
1	463322	463420	RLOC_00000150	.	-	220.79	0.0258	0.8881	0.9481	0.1121
1	462998	463122	RLOC_00000150	.	-	191.78	-0.2866	0.2083	0.4347	0.1121
1	470008	470346	RLOC_00000151	.	+	43.18	0.5952	0.06601	0.2238	0.544
1	470481	470573	RLOC_00000151	.	+	114.65	-0.2734	0.2391	0.4696	0.544
1	470287	470370	RLOC_00000151	.	+	0.00	nan	nan	nan	0.544
1	471076	471155	RLOC_00000151	.	+	0.19	-9.3575	1	nan	0.544
1	469970	470346	RLOC_00000151	.	+	15.19	-0.5746	0.5265	0.7273	0.544
1	469970	470251	RLOC_00000151	.	+	0.00	nan	nan	nan	0.544
1	470481	470573	RLOC_00000152	.	-	0.82	-2.0388	0.9046	nan	nan
1	466030	474481	RLOC_00000152	.	-	0.08	7.9454	0.9613	nan	nan
1	466183	473980	RLOC_00000152	.	-	0.04	7.0255	0.9853	nan	nan
1	472506	472667	RLOC_00000153	.	-	23.21	nan	nan	nan	nan
1	474886	475141	RLOC_00000154	.	+	22.76	nan	nan	nan	nan
1	478302	478524	RLOC_00000155	.	+	108.20	-0.2507	0.06922	0.2298	0.1226
1	478668	478789	RLOC_00000155	.	+	66.72	0.4973	0.00652	0.05571	0.1226
1	477204	477715	RLOC_00000155	.	+	53.78	-0.1294	0.4391	0.6599	0.1226
1	481618	482269	RLOC_00000156	.	+	78.92	nan	nan	nan	nan
1	489061	489145	RLOC_00000157	.	+	18.06	-0.6710	0.09508	0.2768	0.6468
1	487363	488719	RLOC_00000157	.	+	17.80	0.6610	0.09567	0.2778	0.6468
1	487667	491255	RLOC_00000158	.	-	0.04	nan	nan	nan	nan
1	491378	491487	RLOC_00000159	.	+	94.39	0.3446	0.1085	0.2991	0.2998
1	491005	491233	RLOC_00000159	.	+	62.59	0.0380	0.9301	0.9685	0.2998
1	492351	492442	RLOC_00000159	.	+	168.92	0.0453	0.7162	0.8521	0.2998
1	492522	492606	RLOC_00000159	.	+	159.23	-0.4362	0.02429	0.1229	0.2998
1	492157	492247	RLOC_00000159	.	+	217.09	0.0538	0.7146	0.8512	0.2998
1	491958	492085	RLOC_00000159	.	+	225.03	0.0198	0.7811	0.89	0.2998
1	491113	491233	RLOC_00000159	.	+	0.14	-9.5212	0.8241	nan	0.2998
1	491802	491906	RLOC_00000159	.	+	221.90	-0.0062	0.9137	0.9605	0.2998
1	495103	495201	RLOC_00000160	.	+	1.14	-0.5237	0.9596	nan	nan
1	495103	496612	RLOC_00000160	.	+	0.76	0.1133	0.9728	nan	nan
1	492773	501207	RLOC_00000160	.	+	0.13	10.3906	0.9569	nan	nan
1	495488	495562	RLOC_00000161	.	-	0.00	nan	nan	nan	nan
1	495832	495911	RLOC_00000161	.	-	0.62	-1.1116	0.8715	nan	nan
1	495681	495756	RLOC_00000161	.	-	0.06	-7.9694	0.9493	nan	nan
1	495258	495349	RLOC_00000161	.	-	0.16	11.2582	0.7695	nan	nan
1	497240	497328	RLOC_00000162	.	-	0.00	nan	nan	nan	nan
1	496898	497164	RLOC_00000162	.	-	0.00	nan	nan	nan	nan
1	497090	497164	RLOC_00000162	.	-	0.00	nan	nan	nan	nan
1	496669	496759	RLOC_00000162	.	-	0.00	nan	nan	nan	nan
1	496898	496971	RLOC_00000162	.	-	0.00	nan	nan	nan	nan
1	506533	506643	RLOC_00000164	.	-	1.26	1.6657	0.7011	nan	nan
1	505582	505844	RLOC_00000164	.	-	2.42	2.0420	0.8768	nan	nan
1	505406	505498	RLOC_00000164	.	-	1.69	14.5486	0.2037	nan	nan
1	506183	506366	RLOC_00000164	.	-	3.79	-0.9204	0.3389	nan	nan
1	506051	506136	RLOC_00000164	.	-	3.34	-1.3205	0.3635	nan	nan
1	514799	514891	RLOC_00000165	.	-	560.25	0.4858	0.006201	0.05399	0.007131
1	514033	514105	RLOC_00000165	.	-	382.22	-0.2504	0.1553	0.3675	0.007131
1	514990	515092	RLOC_00000165	.	-	524.28	0.3409	0.02842	0.1347	0.007131
1	512619	513146	RLOC_00000165	.	-	5.13	-2.4363	0.03359	nan	0.007131
1	514604	514704	RLOC_00000165	.	-	672.81	0.2023	0.04334	0.1743	0.007131
1	512429	512524	RLOC_00000165	.	-	5.64	-1.7870	0.042	nan	0.007131
1	511989	512073	RLOC_00000165	.	-	8.83	-1.0442	0.05521	0.2012	0.007131
1	512261	512377	RLOC_00000165	.	-	5.10	-1.3226	0.2383	nan	0.007131
1	514183	514270	RLOC_00000165	.	-	742.78	-0.1761	0.000124	0.004664	0.007131
1	514469	514552	RLOC_00000165	.	-	854.58	0.0166	0.4807	0.6924	0.007131
1	514317	514421	RLOC_00000165	.	-	837.34	-0.1373	0.03004	0.1393	0.007131
1	513245	513331	RLOC_00000165	.	-	4.96	0.5528	0.3498	nan	0.007131
1	512120	512213	RLOC_00000165	.	-	2.80	-0.0233	0.9791	nan	0.007131
1	513823	518295	RLOC_00000166	.	+	0.04	-0.0000	1	nan	nan
1	518377	519032	RLOC_00000166	.	+	0.04	0.0000	1	nan	nan
1	513823	518295	RLOC_00000167	.	+	0.04	-0.0000	1	nan	nan
1	518377	519032	RLOC_00000167	.	+	0.04	0.0000	1	nan	nan
1	518377	519032	RLOC_00000168	.	+	177.46	-0.0904	0.3616	0.5922	0.8602
1	518377	519035	RLOC_00000168	.	+	2349.32	0.0291	0.2059	0.432	0.8602
1	520803	520889	RLOC_00000169	.	-	0.00	nan	nan	nan	nan
1	523875	524124	RLOC_00000170	.	+	0.00	nan	nan	nan	0.3368
1	527920	528009	RLOC_00000170	.	+	7.26	-1.9326	0.02904	0.1366	0.3368
1	525137	525223	RLOC_00000170	.	+	1.73	1.6924	0.4406	nan	0.3368
1	528308	528391	RLOC_00000170	.	+	7.93	-0.4666	0.5694	0.7577	0.3368
1	524836	524916	RLOC_00000170	.	+	1.86	-0.8118	0.857	nan	0.3368
1	525461	525545	RLOC_00000170	.	+	4.95	2.0462	0.01453	nan	0.3368
1	524435	524520	RLOC_00000170	.	+	3.75	0.4524	0.3944	nan	0.3368
1	524574	524661	RLOC_00000170	.	+	1.53	-0.0421	0.6996	nan	0.3368
1	523674	524124	RLOC_00000170	.	+	3.82	-0.0202	0.7961	nan	0.3368
1	527576	527657	RLOC_00000170	.	+	8.40	-0.9168	0.5663	0.7554	0.3368
1	527201	527310	RLOC_00000170	.	+	3.57	1.3988	0.01817	nan	0.3368
1	530901	530979	RLOC_00000171	.	+	0.11	-8.5899	1	nan	nan
1	533004	533078	RLOC_00000171	.	+	0.61	16.4320	0.2077	nan	nan
1	533344	533452	RLOC_00000171	.	+	1.31	-1.7684	0.3549	nan	nan
1	530577	530680	RLOC_00000171	.	+	0.11	-8.5900	1	nan	nan
1	534106	534188	RLOC_00000171	.	+	1.74	-1.5976	0.9187	nan	nan
1	530098	530181	RLOC_00000171	.	+	0.00	nan	nan	nan	nan
1	530235	530402	RLOC_00000171	.	+	0.06	13.1843	0.8515	nan	nan
1	531217	531324	RLOC_00000171	.	+	0.27	2.9964	0.9044	nan	nan
1	533715	533807	RLOC_00000171	.	+	0.39	0.6730	0.9338	nan	nan
1	532916	538246	RLOC_00000173	.	+	0.06	-0.1277	0.9067	nan	nan
1	538327	538418	RLOC_00000173	.	+	0.06	-0.1277	0.9067	nan	nan
1	519018	538781	RLOC_00000173	.	+	0.08	0.1180	0.9067	nan	nan
1	522207	538781	RLOC_00000173	.	+	0.08	0.1180	0.9067	nan	nan
1	538129	538208	RLOC_00000174	.	+	1762.41	0.1601	0.1211	0.3187	0.02619
1	539007	539254	RLOC_00000174	.	+	2133.03	-0.1795	0.0007416	0.01474	0.02619
1	539288	539390	RLOC_00000174	.	+	2087.02	-0.0936	0.01849	0.1043	0.02619
1	538327	538418	RLOC_00000174	.	+	2144.78	0.2304	0.01705	0.09952	0.02619
1	538718	538807	RLOC_00000174	.	+	1769.94	-0.0005	0.7682	0.8829	0.02619
1	539478	539610	RLOC_00000174	.	+	2160.03	0.1188	0.2823	0.5158	0.02619
1	538852	538935	RLOC_00000174	.	+	2061.43	-0.1206	0.04534	0.179	0.02619
1	538532	538626	RLOC_00000174	.	+	1499.09	0.1410	0.1091	0.2999	0.02619
1	539998	556867	RLOC_00000175	.	+	0.38	0.7794	0.9926	nan	nan
1	540014	559504	RLOC_00000175	.	+	0.08	-1.5020	0.9927	nan	nan
1	539998	556867	RLOC_00000176	.	+	0.38	0.7794	0.9926	nan	nan
1	540014	559504	RLOC_00000176	.	+	0.08	-1.5020	0.9927	nan	nan
1	548601	548814	RLOC_00000177	.	+	0.33	0.6378	0.9872	nan	nan
1	546399	546511	RLOC_00000177	.	+	0.00	nan	nan	nan	nan
1	546773	546870	RLOC_00000177	.	+	0.17	-0.3869	0.6051	nan	nan
1	547878	547969	RLOC_00000177	.	+	0.00	nan	nan	nan	nan
1	546938	547023	RLOC_00000177	.	+	0.00	nan	nan	nan	nan
1	547171	547247	RLOC_00000177	.	+	0.00	nan	nan	nan	nan
1	548180	548310	RLOC_00000177	.	+	0.04	-2.2089	0.5965	nan	nan
1	545061	545631	RLOC_00000177	.	+	0.00	nan	nan	nan	nan
1	547373	547462	RLOC_00000177	.	+	0.00	nan	nan	nan	nan
1	546636	546726	RLOC_00000177	.	+	0.33	0.6195	0.6317	nan	nan
1	547670	547747	RLOC_00000177	.	+	0.00	nan	nan	nan	nan
1	548050	548133	RLOC_00000177	.	+	0.04	-2.2089	0.5965	nan	nan
1	544803	544972	RLOC_00000177	.	+	0.00	nan	nan	nan	nan
1	548438	548524	RLOC_00000177	.	+	0.20	-0.1264	0.7062	nan	nan
1	546234	546312	RLOC_00000177	.	+	0.50	1.2066	0.6478	nan	nan
1	545962	546061	RLOC_00000177	.	+	0.12	-0.7387	0.6396	nan	nan
1	548032	551009	RLOC_00000178	.	-	0.34	0.2581	0.9346	nan	nan
1	551094	551346	RLOC_00000178	.	-	0.48	-0.2258	0.9346	nan	nan
1	552372	552455	RLOC_00000179	.	-	0.00	nan	nan	nan	nan
1	552181	552274	RLOC_00000179	.	-	0.00	nan	nan	nan	nan
1	552505	552686	RLOC_00000179	.	-	0.00	nan	nan	nan	nan
1	539998	556867	RLOC_00000180	.	+	0.38	0.7794	0.9926	nan	nan
1	540014	559504	RLOC_00000180	.	+	0.08	-1.5020	0.9927	nan	nan
1	555642	555725	RLOC_00000181	.	-	404.35	0.1788	0.1711	0.3884	0.1324
1	553676	554471	RLOC_00000181	.	-	363.02	0.0293	0.5245	0.7258	0.1324
1	553260	553394	RLOC_00000181	.	-	351.83	-0.4141	0.007265	0.05952	0.1324
1	554612	554795	RLOC_00000181	.	-	262.14	0.0930	0.2017	0.4267	0.1324
1	553489	553599	RLOC_00000181	.	-	282.25	-0.1098	0.8175	0.9102	0.1324
1	554862	555571	RLOC_00000181	.	-	306.94	0.0368	0.6514	0.8127	0.1324
1	554862	555023	RLOC_00000181	.	-	0.00	nan	nan	nan	0.1324
1	558612	558707	RLOC_00000182	.	-	0.46	1.1102	1	nan	0.9894
1	558119	558208	RLOC_00000182	.	-	9.93	-0.2566	0.4435	0.6635	0.9894
1	557990	558065	RLOC_00000182	.	-	3.54	0.2458	0.674	nan	0.9894
1	558174	558267	RLOC_00000183	.	+	1.78	nan	nan	nan	nan
1	557107	557316	RLOC_00000183	.	+	0.00	nan	nan	nan	nan
1	561694	561901	RLOC_00000185	.	-	5.57	1.0852	0.9657	nan	nan
1	561319	561452	RLOC_00000185	.	-	0.28	-8.3520	0.9617	nan	nan
1	565952	566042	RLOC_00000186	.	+	135.27	0.0391	0.8125	0.9074	0.1013
1	564696	565432	RLOC_00000186	.	+	158.53	0.4217	0.004981	0.04729	0.1013
1	566139	566225	RLOC_00000186	.	+	147.17	-0.1297	0.2217	0.4506	0.1013
1	565710	565783	RLOC_00000186	.	+	134.53	-0.2131	0.01897	0.1059	0.1013
1	568738	568831	RLOC_00000187	.	+	7.66	0.3524	0.8616	0.9341	1
1	569222	569304	RLOC_00000187	.	+	5.71	-0.4048	0.879	nan	1
1	572758	572835	RLOC_00000188	.	-	225.22	-0.1774	0.8645	0.9356	0.9632
1	573251	573337	RLOC_00000188	.	-	168.21	-0.0062	0.7866	0.893	0.9632
1	573396	573488	RLOC_00000188	.	-	175.99	-0.1036	0.437	0.6582	0.9632
1	573952	574119	RLOC_00000188	.	-	184.16	0.2120	0.3563	0.5875	0.9632
1	579524	579646	RLOC_00000189	.	+	10.51	-0.5657	0.9486	0.9772	0.6849
1	578790	578894	RLOC_00000189	.	+	9.61	0.0928	0.8674	0.9371	0.6849
1	579016	579195	RLOC_00000189	.	+	9.27	0.2377	0.5772	0.7628	0.6849
1	577940	577978	RLOC_00000189	.	+	0.00	nan	nan	nan	0.6849
1	578450	578534	RLOC_00000189	.	+	4.82	0.7571	0.5557	nan	0.6849
1	578078	578180	RLOC_00000189	.	+	0.00	nan	nan	nan	0.6849
1	576612	576849	RLOC_00000189	.	+	6.22	0.2116	0.7107	nan	0.6849
1	578051	578180	RLOC_00000189	.	+	10.79	-0.6873	0.1981	0.422	0.6849
1	578243	578545	RLOC_00000189	.	+	0.00	nan	nan	nan	0.6849
1	578243	578331	RLOC_00000189	.	+	7.46	0.6064	0.5715	0.759	0.6849
1	579311	579420	RLOC_00000189	.	+	14.58	-1.2173	0.1082	0.2986	0.6849
1	576911	576993	RLOC_00000189	.	+	4.46	0.3469	0.2124	nan	0.6849
1	579966	580049	RLOC_00000189	.	+	4.26	1.6175	0.09123	nan	0.6849
1	577905	577978	RLOC_00000189	.	+	8.05	-0.1765	0.6309	0.7995	0.6849
1	576144	576547	RLOC_00000189	.	+	0.00	nan	nan	nan	0.6849
1	578619	578721	RLOC_00000189	.	+	9.91	0.4477	0.7601	0.8781	0.6849
1	577591	577783	RLOC_00000189	.	+	5.34	-0.2694	0.8095	nan	0.6849
1	580129	580226	RLOC_00000189	.	+	9.05	-0.2574	0.9056	0.9565	0.6849
1	579798	579878	RLOC_00000189	.	+	22.35	0.2072	0.4541	0.6718	0.6849
1	581314	581496	RLOC_00000190	.	+	140.54	0.1033	0.4225	0.6457	0.02757
1	580744	581069	RLOC_00000190	.	+	101.18	0.0720	0.6972	0.8408	0.02757
1	581185	581277	RLOC_00000190	.	+	156.38	0.1427	0.2506	0.4822	0.02757
1	581717	581814	RLOC_00000190	.	+	205.68	-0.3154	0.0008032	0.0155	0.02757
1	581555	581643	RLOC_00000190	.	+	169.59	0.1519	0.2193	0.4478	0.02757
1	573952	574119	RLOC_00000191	.	-	1.01	-0.0000	1	nan	nan
1	574211	587343	RLOC_00000191	.	-	1.01	0.0000	1	nan	nan
1	586319	586438	RLOC_00000192	.	+	43.84	-0.0211	0.8564	0.9316	0.8125
1	586100	586191	RLOC_00000192	.	+	60.14	-0.3721	0.4957	0.7042	0.8125
1	585684	585775	RLOC_00000192	.	+	0.00	nan	nan	nan	0.8125
1	585367	585499	RLOC_00000192	.	+	23.94	0.3621	0.3327	0.5655	0.8125
1	584955	585052	RLOC_00000192	.	+	36.10	0.3465	0.1692	0.3859	0.8125
1	584617	584859	RLOC_00000192	.	+	37.40	0.3846	0.1951	0.4184	0.8125
1	586565	586648	RLOC_00000192	.	+	61.08	-0.1734	0.4185	0.6425	0.8125
1	585941	586022	RLOC_00000192	.	+	44.86	-0.2656	0.7007	0.8431	0.8125
1	585684	585778	RLOC_00000192	.	+	45.05	-0.2265	0.6526	0.8134	0.8125
1	585143	585236	RLOC_00000192	.	+	34.92	0.2556	0.364	0.5947	0.8125
1	590002	590400	RLOC_00000193	.	+	0.00	nan	nan	nan	nan
1	588539	588662	RLOC_00000193	.	+	12.54	nan	nan	nan	nan
1	589575	596829	RLOC_00000194	.	-	0.23	nan	nan	nan	nan
1	593228	593865	RLOC_00000195	.	+	70.77	nan	nan	nan	nan
1	596477	596571	RLOC_00000196	.	-	39.50	-0.0417	0.9158	0.9617	1
1	597381	597520	RLOC_00000196	.	-	52.97	0.0354	0.8904	0.9493	1
1	600975	601226	RLOC_00000197	.	-	100.51	-0.2590	0.1176	0.3134	0.3063
1	600233	600433	RLOC_00000197	.	-	69.67	0.0090	0.8889	0.9485	0.3063
1	599811	599891	RLOC_00000197	.	-	83.71	-0.4142	0.08822	0.2649	0.3063
1	601371	601546	RLOC_00000197	.	-	51.92	0.4813	0.02511	0.1253	0.3063
1	600512	600720	RLOC_00000197	.	-	75.10	0.1246	0.3878	0.6153	0.3063
1	599975	600064	RLOC_00000197	.	-	92.72	-0.2471	0.3794	0.6081	0.3063
1	601705	601811	RLOC_00000197	.	-	44.04	0.4687	0.1231	0.3216	0.3063
1	600824	600935	RLOC_00000197	.	-	84.66	-0.1222	0.534	0.733	0.3063
1	601559	601652	RLOC_00000197	.	-	46.99	0.4918	0.04412	0.1761	0.3063
1	602753	602979	RLOC_00000198	.	+	96.83	0.1729	0.5819	0.7662	0.974
1	603638	603783	RLOC_00000198	.	+	0.00	nan	nan	nan	0.974
1	603124	603600	RLOC_00000198	.	+	106.10	0.0407	0.7743	0.8861	0.974
1	603677	603774	RLOC_00000198	.	+	112.43	-0.0881	0.387	0.6147	0.974
1	606321	606528	RLOC_00000200	.	-	18.60	-0.6557	0.1944	0.4175	0.7402
1	605603	605704	RLOC_00000200	.	-	6.76	0.5577	0.2195	0.448	0.7402
1	605402	605514	RLOC_00000200	.	-	11.74	0.2041	0.4076	0.6334	0.7402
1	605804	605918	RLOC_00000200	.	-	8.49	0.8760	0.1303	0.3322	0.7402
1	606101	606175	RLOC_00000200	.	-	9.61	-0.5115	0.7572	0.8765	0.7402
1	608710	608815	RLOC_00000201	.	-	6061.65	0.2420	0.01293	0.08417	0.002823
1	608146	608241	RLOC_00000201	.	-	6776.52	-0.2436	0.02608	0.1281	0.002823
1	608308	608397	RLOC_00000201	.	-	8785.16	-0.2944	3.143e-05	0.001959	0.002823
1	608937	609279	RLOC_00000201	.	-	8239.10	0.3736	0.0002533	0.007397	0.002823
1	611919	612018	RLOC_00000202	.	-	0.00	nan	nan	nan	nan
1	611528	611617	RLOC_00000202	.	-	0.00	nan	nan	nan	nan
1	610934	611025	RLOC_00000202	.	-	0.00	nan	nan	nan	nan
1	614813	614988	RLOC_00000203	.	-	12.85	-0.4407	0.4027	0.629	0.9612
1	613705	613993	RLOC_00000203	.	-	17.10	0.1518	0.9146	0.9609	0.9612
1	614344	614448	RLOC_00000203	.	-	12.68	-0.1485	0.6101	0.7855	0.9612
1	615482	615851	RLOC_00000203	.	-	5.30	1.0749	0.1797	nan	0.9612
1	615188	615276	RLOC_00000203	.	-	6.74	0.4563	0.3494	0.5812	0.9612
1	614156	614239	RLOC_00000203	.	-	16.53	-0.1558	0.9068	0.9571	0.9612
1	614609	614721	RLOC_00000203	.	-	7.22	-0.6839	0.404	0.6302	0.9612
1	619327	619638	RLOC_00000204	.	+	15.03	nan	nan	nan	nan
1	620738	633020	RLOC_00000205	.	+	0.08	nan	nan	nan	nan
1	620738	633020	RLOC_00000206	.	+	0.08	-6.6946	1	nan	nan
1	622138	622241	RLOC_00000206	.	+	3.79	0.1132	0.9369	nan	nan
1	624133	624230	RLOC_00000207	.	-	1375.51	nan	nan	nan	nan
1	625291	625372	RLOC_00000208	.	-	1.35	nan	nan	nan	nan
1	627381	627481	RLOC_00000209	.	+	652.88	0.1224	0.1197	0.3166	0.2478
1	626827	626912	RLOC_00000209	.	+	448.42	0.1870	0.0381	0.1614	0.2478
1	628855	628945	RLOC_00000209	.	+	29.08	-0.1664	0.8169	0.9098	0.2478
1	627613	627700	RLOC_00000209	.	+	1303.78	0.0651	0.1245	0.3237	0.2478
1	628855	628934	RLOC_00000209	.	+	200.73	0.0862	0.5379	0.7354	0.2478
1	627891	627969	RLOC_00000209	.	+	943.81	0.0018	0.8149	0.9087	0.2478
1	628167	628245	RLOC_00000209	.	+	691.90	-0.2503	0.01814	0.1031	0.2478
1	629320	629417	RLOC_00000209	.	+	911.74	-0.1961	0.08355	0.2566	0.2478
1	627164	627307	RLOC_00000209	.	+	599.72	0.1320	0.2047	0.4305	0.2478
1	628468	628776	RLOC_00000209	.	+	172.60	0.2061	0.191	0.4129	0.2478
1	628018	628111	RLOC_00000209	.	+	703.25	-0.0481	0.7437	0.8688	0.2478
1	628468	628934	RLOC_00000209	.	+	14.47	0.7385	0.137	0.3416	0.2478
1	626827	626916	RLOC_00000209	.	+	126.67	-0.1122	0.7557	0.8756	0.2478
1	627003	627099	RLOC_00000209	.	+	955.38	0.1804	0.01816	0.1032	0.2478
1	629493	629579	RLOC_00000209	.	+	676.27	-0.3627	0.08011	0.2504	0.2478
1	627746	627834	RLOC_00000209	.	+	1301.31	-0.0117	0.8512	0.9285	0.2478
1	628468	629287	RLOC_00000209	.	+	602.37	-0.2302	0.03666	0.1576	0.2478
1	632805	632883	RLOC_00000210	.	+	337.56	-0.3737	0.00296	0.03412	0.009511
1	631857	631927	RLOC_00000210	.	+	18.40	-0.1531	0.6448	0.8083	0.009511
1	632805	632880	RLOC_00000210	.	+	5.40	-1.8555	0.09668	nan	0.009511
1	632347	632420	RLOC_00000210	.	+	299.18	-0.1476	0.3012	0.5347	0.009511
1	631032	631103	RLOC_00000210	.	+	197.04	0.5209	0.000452	0.01066	0.009511
1	632042	632127	RLOC_00000210	.	+	243.40	-0.2014	0.1819	0.4018	0.009511
1	631857	632008	RLOC_00000210	.	+	124.35	-0.0168	0.7585	0.8772	0.009511
1	630894	630977	RLOC_00000210	.	+	183.41	0.3934	0.01042	0.07407	0.009511
1	631178	631264	RLOC_00000210	.	+	199.52	0.4454	0.0001828	0.006063	0.009511
1	632448	632527	RLOC_00000210	.	+	333.56	-0.2371	0.0393	0.1645	0.009511
1	632614	632715	RLOC_00000210	.	+	314.28	-0.4400	0.01053	0.07455	0.009511
1	632564	632715	RLOC_00000210	.	+	4.77	0.6937	0.4058	nan	0.009511
1	631335	631430	RLOC_00000210	.	+	178.26	0.3014	0.11	0.3013	0.009511
1	631517	631602	RLOC_00000210	.	+	157.17	0.1716	0.3353	0.5681	0.009511
1	630702	630831	RLOC_00000210	.	+	144.31	0.3778	0.05167	0.1935	0.009511
1	636885	636983	RLOC_00000211	.	+	1.59	-3.9902	0.8883	nan	0.05542
1	636358	636591	RLOC_00000211	.	+	191.99	0.1353	0.396	0.6231	0.05542
1	636885	636977	RLOC_00000211	.	+	262.41	-0.1885	0.1313	0.3337	0.05542
1	635985	636080	RLOC_00000211	.	+	180.14	0.3575	0.04845	0.1863	0.05542
1	636728	636827	RLOC_00000211	.	+	266.84	-0.2840	0.002162	0.02821	0.05542
1	635650	635738	RLOC_00000211	.	+	157.92	0.4201	0.04911	0.1878	0.05542
1	637722	638257	RLOC_00000213	.	-	158.22	0.1140	0.3956	0.6228	0.9737
1	637513	637601	RLOC_00000213	.	-	189.03	-0.1065	0.3874	0.6149	0.9737
1	637722	638257	RLOC_00000214	.	+	0.42	nan	nan	nan	nan
1	639019	641428	RLOC_00000215	.	-	0.00	nan	nan	nan	nan
1	644255	644349	RLOC_00000217	.	-	53.33	-0.1066	0.5805	0.7653	0.9405
1	643948	644141	RLOC_00000217	.	-	0.25	10.2410	0.6877	nan	0.9405
1	643744	643876	RLOC_00000217	.	-	68.49	0.0855	0.7795	0.8892	0.9405
1	644477	644605	RLOC_00000217	.	-	0.00	nan	nan	nan	0.9405
1	643207	643304	RLOC_00000217	.	-	94.35	0.0128	0.8973	0.9527	0.9405
1	643948	644159	RLOC_00000217	.	-	71.16	0.1384	0.3062	0.5397	0.9405
1	643553	643643	RLOC_00000217	.	-	81.16	-0.1346	0.4554	0.6728	0.9405
1	644260	644349	RLOC_00000217	.	-	37.09	-0.1644	0.8533	0.9297	0.9405
1	646488	646566	RLOC_00000218	.	-	293.02	-0.0468	0.9208	0.964	0.0001083
1	649674	649761	RLOC_00000218	.	-	143.50	0.5071	0.0009638	0.0173	0.0001083
1	650437	650562	RLOC_00000218	.	-	157.72	0.1529	0.1779	0.3968	0.0001083
1	648828	648910	RLOC_00000218	.	-	140.22	0.4497	0.01119	0.07732	0.0001083
1	646955	647037	RLOC_00000218	.	-	216.16	0.2521	0.1135	0.3068	0.0001083
1	649138	649367	RLOC_00000218	.	-	185.04	0.3847	0.000924	0.01686	0.0001083
1	645678	645754	RLOC_00000218	.	-	330.22	-0.3920	0.02472	0.124	0.0001083
1	651538	651710	RLOC_00000218	.	-	129.14	0.5096	0.005849	0.05228	0.0001083
1	647279	647366	RLOC_00000218	.	-	212.15	-0.1152	0.9402	0.9734	0.0001083
1	647106	647183	RLOC_00000218	.	-	212.29	0.3293	0.0163	0.09677	0.0001083
1	646688	646776	RLOC_00000218	.	-	267.58	-0.1695	0.4098	0.6351	0.0001083
1	648274	648361	RLOC_00000218	.	-	146.55	0.2519	0.05391	0.1986	0.0001083
1	646309	646566	RLOC_00000218	.	-	0.00	nan	nan	nan	0.0001083
1	647806	647923	RLOC_00000218	.	-	190.88	0.1366	0.1262	0.326	0.0001083
1	648655	648765	RLOC_00000218	.	-	116.44	0.2669	0.07498	0.241	0.0001083
1	649458	649550	RLOC_00000218	.	-	129.66	0.3672	0.1957	0.4191	0.0001083
1	647619	647702	RLOC_00000218	.	-	264.45	0.1166	0.1356	0.3396	0.0001083
1	650903	651127	RLOC_00000218	.	-	117.43	0.1943	0.1062	0.2952	0.0001083
1	651218	651319	RLOC_00000218	.	-	102.33	0.4080	0.02513	0.1254	0.0001083
1	645813	645898	RLOC_00000218	.	-	385.50	-0.5088	0.009078	0.06813	0.0001083
1	645484	645574	RLOC_00000218	.	-	395.76	-0.7212	3.089e-07	8.498e-05	0.0001083
1	648431	648507	RLOC_00000218	.	-	137.51	0.0812	0.2572	0.4893	0.0001083
1	647994	648101	RLOC_00000218	.	-	212.54	0.1446	0.1221	0.3202	0.0001083
1	650708	650790	RLOC_00000218	.	-	78.97	0.8530	0.001275	0.0205	0.0001083
1	646036	646125	RLOC_00000218	.	-	306.73	-0.5136	0.003568	0.03844	0.0001083
1	646309	646405	RLOC_00000218	.	-	447.30	-0.5583	0.0008174	0.01566	0.0001083
1	647441	647530	RLOC_00000218	.	-	238.87	0.1264	0.1425	0.3494	0.0001083
1	646311	664178	RLOC_00000219	.	-	0.08	nan	nan	nan	nan
1	656744	656826	RLOC_00000220	.	-	235.06	0.1802	0.1389	0.3443	0.07443
1	656504	656587	RLOC_00000220	.	-	481.51	0.0386	0.5203	0.7229	0.07443
1	656028	656133	RLOC_00000220	.	-	435.61	-0.2275	0.03794	0.161	0.07443
1	657494	657855	RLOC_00000220	.	-	196.56	0.4712	0.005955	0.05273	0.07443
1	657057	657141	RLOC_00000220	.	-	347.38	-0.0257	0.9376	0.9722	0.07443
1	655822	655932	RLOC_00000220	.	-	557.81	-0.4829	0.007628	0.06125	0.07443
1	657276	657391	RLOC_00000220	.	-	191.09	0.6299	0.003268	0.03639	0.07443
1	656233	656316	RLOC_00000220	.	-	380.47	0.0226	0.6764	0.828	0.07443
1	659470	659555	RLOC_00000221	.	-	118.80	-0.0047	0.5234	0.7251	1
1	659315	659422	RLOC_00000221	.	-	119.81	0.0047	0.5237	0.7253	1
1	661789	661900	RLOC_00000222	.	-	127.36	-0.2544	0.1291	0.3304	0.7294
1	662252	662333	RLOC_00000222	.	-	0.00	nan	nan	nan	0.7294
1	661948	662041	RLOC_00000222	.	-	132.87	0.2505	0.1258	0.3254	0.7294
1	663901	664016	RLOC_00000223	.	-	1.79	-1.6152	0.5276	nan	nan
1	664129	664204	RLOC_00000223	.	-	1.07	0.4643	0.955	nan	nan
1	663544	663614	RLOC_00000223	.	-	0.35	10.3248	0.8492	nan	nan
1	663662	663759	RLOC_00000223	.	-	0.95	1.6025	0.8301	nan	nan
1	665776	665861	RLOC_00000224	.	-	58.52	0.0189	0.8082	0.905	0.4647
1	665776	665857	RLOC_00000224	.	-	0.00	nan	nan	nan	0.4647
1	666261	666350	RLOC_00000224	.	-	3.15	-3.7679	0.008807	nan	0.4647
1	666255	666350	RLOC_00000224	.	-	28.72	-0.4872	0.2604	0.4928	0.4647
1	665909	666113	RLOC_00000224	.	-	50.15	0.3111	0.04922	0.188	0.4647
1	665233	665249	RLOC_00000224	.	-	0.00	nan	nan	nan	0.4647
1	665444	665894	RLOC_00000225	.	+	0.00	nan	nan	nan	nan
1	665975	666119	RLOC_00000225	.	+	0.00	nan	nan	nan	nan
1	669133	669226	RLOC_00000226	.	-	87.84	0.5893	0.005881	0.05242	0.008665
1	668081	668172	RLOC_00000226	.	-	96.51	-0.4642	0.07345	0.238	0.008665
1	668744	668855	RLOC_00000226	.	-	68.70	0.3034	0.1036	0.2912	0.008665
1	667463	667540	RLOC_00000226	.	-	73.05	-0.1182	0.7438	0.8689	0.008665
1	669649	669749	RLOC_00000226	.	-	52.03	0.1386	0.4471	0.6663	0.008665
1	667867	667956	RLOC_00000226	.	-	101.48	-0.4082	0.1658	0.3814	0.008665
1	667067	667150	RLOC_00000226	.	-	117.90	-0.5592	0.01671	0.0983	0.008665
1	667280	667372	RLOC_00000226	.	-	110.18	-0.7714	0.0001622	0.005563	0.008665
1	669512	669619	RLOC_00000226	.	-	81.97	0.0196	0.656	0.8156	0.008665
1	667436	667540	RLOC_00000226	.	-	37.15	-0.6658	0.2536	0.4854	0.008665
1	668467	668612	RLOC_00000226	.	-	71.85	0.4309	0.06005	0.2117	0.008665
1	667640	667734	RLOC_00000226	.	-	121.29	0.1256	0.5013	0.7081	0.008665
1	669265	669460	RLOC_00000226	.	-	81.19	0.4439	0.02592	0.1276	0.008665
1	668986	669078	RLOC_00000226	.	-	105.85	0.7410	0.0003782	0.009539	0.008665
1	672547	672650	RLOC_00000227	.	-	0.00	nan	nan	nan	nan
1	671782	671918	RLOC_00000227	.	-	0.00	nan	nan	nan	nan
1	671973	672105	RLOC_00000227	.	-	0.00	nan	nan	nan	nan
1	672144	672331	RLOC_00000227	.	-	0.00	nan	nan	nan	nan
1	672405	672517	RLOC_00000227	.	-	0.00	nan	nan	nan	nan
1	673705	673963	RLOC_00000228	.	+	12.47	0.2618	0.2618	0.4941	0.4339
1	675493	675591	RLOC_00000228	.	+	14.40	-0.0071	0.7405	0.8671	0.4339
1	675076	675186	RLOC_00000228	.	+	3.43	-0.1296	0.5851	nan	0.4339
1	674164	674440	RLOC_00000228	.	+	7.63	0.0549	0.4943	0.7033	0.4339
1	674703	674812	RLOC_00000228	.	+	8.75	0.8478	0.2229	0.4517	0.4339
1	675944	676043	RLOC_00000228	.	+	15.19	-0.9744	0.04402	0.1758	0.4339
1	674023	674098	RLOC_00000228	.	+	7.88	-0.2739	0.8216	0.9124	0.4339
1	675226	675339	RLOC_00000228	.	+	8.15	-0.4092	0.5502	0.7444	0.4339
1	674879	674967	RLOC_00000228	.	+	7.83	1.1557	0.1075	0.2974	0.4339
1	679996	680102	RLOC_00000229	.	+	0.17	8.4755	0.9066	nan	nan
1	678001	678093	RLOC_00000229	.	+	0.00	nan	nan	nan	nan
1	681024	681110	RLOC_00000229	.	+	0.46	-15.7387	0.6955	nan	nan
1	679729	679820	RLOC_00000229	.	+	0.00	nan	nan	nan	nan
1	679287	679367	RLOC_00000229	.	+	0.00	nan	nan	nan	nan
1	677433	677850	RLOC_00000229	.	+	0.00	nan	nan	nan	nan
1	680483	680558	RLOC_00000229	.	+	0.00	nan	nan	nan	nan
1	679059	679147	RLOC_00000229	.	+	0.00	nan	nan	nan	nan
1	680263	680340	RLOC_00000229	.	+	0.50	10.0514	0.902	nan	nan
1	678521	678591	RLOC_00000229	.	+	0.00	nan	nan	nan	nan
1	678872	678970	RLOC_00000229	.	+	0.00	nan	nan	nan	nan
1	679489	679577	RLOC_00000229	.	+	0.00	nan	nan	nan	nan
1	678192	678288	RLOC_00000229	.	+	0.00	nan	nan	nan	nan
1	680776	680857	RLOC_00000229	.	+	0.00	nan	nan	nan	nan
1	681920	682242	RLOC_00000230	.	-	120.01	-0.8567	9.808e-05	0.004026	0.006045
1	686604	686678	RLOC_00000230	.	-	30.89	0.6065	0.03306	0.1479	0.006045
1	682091	682242	RLOC_00000230	.	-	0.08	10.2699	1	nan	0.006045
1	686423	686504	RLOC_00000230	.	-	40.41	1.1573	0.000755	0.01491	0.006045
1	687008	687106	RLOC_00000230	.	-	0.13	10.7384	1	nan	0.006045
1	682891	683022	RLOC_00000230	.	-	2.81	-0.1840	0.8115	nan	0.006045
1	683076	683174	RLOC_00000230	.	-	0.24	11.7411	0.7389	nan	0.006045
1	682402	682731	RLOC_00000230	.	-	98.74	-0.5207	0.03822	0.1617	0.006045
1	682891	683174	RLOC_00000230	.	-	77.68	-0.1980	0.4047	0.6307	0.006045
1	683316	683401	RLOC_00000230	.	-	70.49	0.1108	0.3976	0.6246	0.006045
1	686750	686843	RLOC_00000230	.	-	38.99	0.4597	0.05848	0.2084	0.006045
1	685964	686055	RLOC_00000230	.	-	45.18	0.6462	0.01462	0.09061	0.006045
1	684776	684863	RLOC_00000230	.	-	52.77	0.6272	0.03009	0.1395	0.006045
1	686596	686678	RLOC_00000230	.	-	0.99	13.6490	0.4713	nan	0.006045
1	687008	687114	RLOC_00000230	.	-	0.00	nan	nan	nan	0.006045
1	689812	689984	RLOC_00000231	.	-	76.69	0.2269	0.198	0.4219	0.04699
1	690172	690398	RLOC_00000231	.	-	88.84	0.2811	0.2519	0.4834	0.04699
1	688145	688280	RLOC_00000231	.	-	220.53	-0.2827	0.1992	0.4235	0.04699
1	691363	691442	RLOC_00000231	.	-	45.16	0.7875	0.006387	0.05501	0.04699
1	689408	689531	RLOC_00000231	.	-	126.58	-0.1753	0.3691	0.5993	0.04699
1	690578	690756	RLOC_00000231	.	-	64.38	0.4683	0.1242	0.3233	0.04699
1	691755	691898	RLOC_00000231	.	-	1.68	0.9785	0.3144	nan	0.04699
1	690897	691120	RLOC_00000231	.	-	65.39	0.3658	0.07613	0.2431	0.04699
1	689157	689250	RLOC_00000231	.	-	178.47	-0.1761	0.3655	0.596	0.04699
1	692077	692174	RLOC_00000231	.	-	96.29	0.8566	0.001715	0.02447	0.04699
1	688949	689035	RLOC_00000231	.	-	134.90	-0.1104	0.5583	0.7502	0.04699
1	688601	688678	RLOC_00000231	.	-	139.68	-0.3301	0.0254	0.1261	0.04699
1	688363	688457	RLOC_00000231	.	-	147.19	-0.2147	0.1275	0.3279	0.04699
1	695475	695546	RLOC_00000232	.	+	1.18	-3.4423	0.781	nan	nan
1	694182	694279	RLOC_00000232	.	+	0.56	13.0372	0.6593	nan	nan
1	695792	695886	RLOC_00000232	.	+	0.96	0.5001	0.8134	nan	nan
1	694037	694116	RLOC_00000232	.	+	0.32	12.2347	0.785	nan	nan
1	693570	694116	RLOC_00000232	.	+	0.22	-13.4688	0.7938	nan	nan
1	702182	702275	RLOC_00000234	.	+	115.77	0.3850	0.1317	0.3342	0.113
1	703380	703481	RLOC_00000234	.	+	103.63	-0.5600	0.005796	0.05198	0.113
1	702018	702105	RLOC_00000234	.	+	102.09	0.3405	0.0989	0.2832	0.113
1	702467	702566	RLOC_00000234	.	+	105.59	-0.0281	0.7607	0.8785	0.113
1	703097	703194	RLOC_00000234	.	+	130.98	-0.0853	0.6442	0.808	0.113
1	702736	702827	RLOC_00000234	.	+	69.81	-0.0474	0.6621	0.8193	0.113
1	702900	703011	RLOC_00000234	.	+	70.97	0.1873	0.5842	0.7676	0.113
1	703255	703352	RLOC_00000234	.	+	128.30	-0.4907	0.005835	0.05219	0.113
1	702596	702678	RLOC_00000234	.	+	88.72	-0.0252	0.8126	0.9075	0.113
1	701874	701975	RLOC_00000234	.	+	86.92	0.4631	0.04128	0.1694	0.113
1	701680	701774	RLOC_00000234	.	+	69.74	0.3497	0.2418	0.4726	0.113
1	704493	704587	RLOC_00000235	.	-	191.19	-0.2053	0.06615	0.2241	0.3491
1	705640	706100	RLOC_00000235	.	-	14.12	-0.2733	0.451	0.6693	0.3491
1	705128	705301	RLOC_00000235	.	-	175.71	-0.0138	0.828	0.9161	0.3491
1	705366	705533	RLOC_00000235	.	-	175.58	-0.0419	0.7084	0.8475	0.3491
1	704667	705063	RLOC_00000235	.	-	209.23	0.0156	0.8581	0.9325	0.3491
1	705655	706100	RLOC_00000235	.	-	196.49	0.2965	0.03065	0.1411	0.3491
1	708188	708303	RLOC_00000236	.	+	0.00	nan	nan	nan	nan
1	708508	708600	RLOC_00000236	.	+	0.00	nan	nan	nan	nan
1	709466	709597	RLOC_00000236	.	+	0.62	nan	nan	nan	nan
1	710332	710694	RLOC_00000237	.	-	116.53	-0.0196	0.8179	0.9104	0.6866
1	711407	711504	RLOC_00000237	.	-	81.95	0.3347	0.109	0.2998	0.6866
1	710800	710954	RLOC_00000237	.	-	75.39	-0.2021	0.3816	0.6102	0.6866
1	711183	711262	RLOC_00000237	.	-	92.87	0.1577	0.3372	0.5698	0.6866
1	711015	711091	RLOC_00000237	.	-	70.82	-0.1317	0.6315	0.7999	0.6866
1	710135	710240	RLOC_00000237	.	-	115.22	-0.1553	0.5013	0.708	0.6866
1	714205	714316	RLOC_00000238	.	-	45.71	-0.0485	0.6849	0.8334	0.009452
1	714462	714557	RLOC_00000238	.	-	41.65	-0.2705	0.6333	0.8013	0.009452
1	725607	725688	RLOC_00000238	.	-	17.35	1.3393	0.0001816	0.006026	0.009452
1	724388	724680	RLOC_00000238	.	-	16.79	-0.1973	0.5882	0.7704	0.009452
1	725823	726036	RLOC_00000238	.	-	15.64	0.4722	0.2732	0.506	0.009452
1	714863	715006	RLOC_00000238	.	-	62.45	-0.4803	0.1182	0.3142	0.009452
1	720584	720680	RLOC_00000238	.	-	25.83	-0.4955	0.2885	0.5222	0.009452
1	725080	725235	RLOC_00000238	.	-	10.17	-0.3321	0.4377	0.6588	0.009452
1	726343	726709	RLOC_00000238	.	-	13.35	1.2440	0.002328	0.02955	0.009452
1	724745	724889	RLOC_00000238	.	-	17.47	0.0902	0.5679	0.7566	0.009452
1	725408	725551	RLOC_00000238	.	-	18.25	1.3891	0.0005602	0.0123	0.009452
1	722006	722115	RLOC_00000238	.	-	18.80	-0.3395	0.952	0.9788	0.009452
1	718414	718502	RLOC_00000238	.	-	4.40	1.4584	0.1022	nan	0.009452
1	726346	726709	RLOC_00000238	.	-	0.16	8.7577	0.9748	nan	0.009452
1	718661	718934	RLOC_00000238	.	-	18.81	0.4611	0.1739	0.392	0.009452
1	721794	721904	RLOC_00000238	.	-	23.71	-0.2586	0.8222	0.9127	0.009452
1	722814	722965	RLOC_00000238	.	-	17.30	0.4462	0.1333	0.3365	0.009452
1	715314	715659	RLOC_00000238	.	-	60.30	-0.5522	0.00898	0.06769	0.009452
1	724118	724274	RLOC_00000238	.	-	20.70	0.1111	0.09559	0.2777	0.009452
1	726121	726274	RLOC_00000238	.	-	16.81	0.6067	0.1257	0.3254	0.009452
1	730609	730915	RLOC_00000239	.	+	13.60	-0.3424	0.682	0.8317	0.5513
1	730022	730139	RLOC_00000239	.	+	9.13	0.6873	0.06767	0.227	0.5513
1	730414	730496	RLOC_00000239	.	+	17.88	-0.2271	0.9269	0.967	0.5513
1	731072	731175	RLOC_00000239	.	+	22.11	-0.4342	0.8341	0.9194	0.5513
1	730055	730139	RLOC_00000239	.	+	2.48	0.4586	0.5282	nan	0.5513
1	737080	737232	RLOC_00000240	.	-	63.86	-0.1043	0.1755	0.3942	0.1808
1	732740	732927	RLOC_00000240	.	-	150.20	-0.8908	0.01277	0.08366	0.1808
1	737623	737873	RLOC_00000240	.	-	52.40	0.2124	0.04707	0.1831	0.1808
1	737419	737561	RLOC_00000240	.	-	13.44	0.4877	0.05175	0.1937	0.1808
1	737436	737561	RLOC_00000240	.	-	30.47	0.7142	0.01134	0.07799	0.1808
1	741206	741508	RLOC_00000241	.	+	181.25	0.3976	0.00423	0.04282	0.03274
1	741064	741147	RLOC_00000241	.	+	281.41	0.1719	0.05487	0.2005	0.03274
1	741794	741945	RLOC_00000241	.	+	427.05	-0.0398	0.8436	0.9245	0.03274
1	742735	742821	RLOC_00000241	.	+	339.23	0.0068	0.8048	0.9034	0.03274
1	743715	743814	RLOC_00000241	.	+	492.65	-0.4704	0.1267	0.3267	0.03274
1	740049	740123	RLOC_00000241	.	+	169.01	0.3632	0.01981	0.1088	0.03274
1	740244	740354	RLOC_00000241	.	+	194.08	0.4807	0.00222	0.02868	0.03274
1	742316	742501	RLOC_00000241	.	+	561.14	-0.0239	0.746	0.8701	0.03274
1	743545	743619	RLOC_00000241	.	+	557.04	-0.3977	0.008354	0.06468	0.03274
1	740756	740969	RLOC_00000241	.	+	393.70	0.0988	0.17	0.3868	0.03274
1	741600	741683	RLOC_00000241	.	+	246.66	0.4861	0.007316	0.05971	0.03274
1	741064	741508	RLOC_00000241	.	+	2.90	3.9765	0.002187	nan	0.03274
1	740501	740619	RLOC_00000241	.	+	144.33	0.4535	0.001022	0.01792	0.03274
1	742981	743089	RLOC_00000241	.	+	521.10	-0.3214	0.001779	0.02501	0.03274
1	743202	743300	RLOC_00000241	.	+	479.40	-0.3511	0.00134	0.02111	0.03274
1	742049	742180	RLOC_00000241	.	+	352.36	0.2116	0.0544	0.1996	0.03274
1	742316	742501	RLOC_00000242	.	-	5.82	-1.2066	0.8858	nan	nan
1	738546	753506	RLOC_00000242	.	-	0.08	8.0467	0.8894	nan	nan
1	746230	746304	RLOC_00000243	.	-	1.27	nan	nan	nan	nan
1	747725	747857	RLOC_00000244	.	+	0.00	nan	nan	nan	nan
1	747530	747621	RLOC_00000244	.	+	0.00	nan	nan	nan	nan
1	744534	753797	RLOC_00000245	.	-	0.07	-11.1095	0.8318	nan	nan
1	744805	753917	RLOC_00000245	.	-	0.06	-10.8955	0.8799	nan	nan
1	746640	753917	RLOC_00000245	.	-	0.06	-10.8955	0.8799	nan	nan
1	738546	753506	RLOC_00000245	.	-	0.08	10.2299	0.8404	nan	nan
1	748357	748564	RLOC_00000245	.	-	0.25	11.8677	0.8162	nan	nan
1	750297	750415	RLOC_00000246	.	+	37.49	0.7099	0.01241	0.08228	0.1923
1	751356	751427	RLOC_00000246	.	+	56.76	-0.1147	0.9694	0.9865	0.1923
1	750626	750795	RLOC_00000246	.	+	53.40	0.2188	0.3298	0.5626	0.1923
1	750873	750956	RLOC_00000246	.	+	40.84	0.0388	0.7479	0.8711	0.1923
1	751222	751296	RLOC_00000246	.	+	55.88	-0.1247	0.9335	0.9702	0.1923
1	750471	750556	RLOC_00000246	.	+	47.74	0.1655	0.4345	0.656	0.1923
1	749494	749784	RLOC_00000246	.	+	54.70	-0.3143	0.4403	0.6609	0.1923
1	749948	750117	RLOC_00000246	.	+	56.36	-0.4983	0.356	0.5872	0.1923
1	751015	751119	RLOC_00000246	.	+	43.81	-0.2670	0.4201	0.6439	0.1923
1	752659	752981	RLOC_00000247	.	+	12.43	nan	nan	nan	nan
1	752711	752981	RLOC_00000247	.	+	0.00	nan	nan	nan	nan
1	754889	755380	RLOC_00000248	.	-	360.54	nan	nan	nan	nan
1	758005	758198	RLOC_00000249	.	+	268.52	-0.1329	0.8196	0.9114	0.8247
1	757685	757936	RLOC_00000249	.	+	348.50	0.0423	0.4982	0.7058	0.8247
1	756734	757553	RLOC_00000249	.	+	277.30	0.1815	0.1778	0.3967	0.8247
1	756537	756644	RLOC_00000249	.	+	333.62	0.1481	0.5546	0.7475	0.8247
1	758258	758349	RLOC_00000249	.	+	376.45	-0.3189	0.2012	0.426	0.8247
1	753824	763377	RLOC_00000250	.	-	0.06	-19.0750	0.6127	nan	nan
1	754069	763979	RLOC_00000250	.	-	0.08	3.3593	0.8788	nan	nan
1	754141	761360	RLOC_00000250	.	-	0.13	3.9734	0.8788	nan	nan
1	753611	762799	RLOC_00000250	.	-	0.06	3.1532	0.8787	nan	nan
1	753964	762775	RLOC_00000250	.	-	0.04	2.6688	0.8526	nan	nan
1	753964	773604	RLOC_00000250	.	-	0.04	2.6688	0.8526	nan	nan
1	754071	769838	RLOC_00000250	.	-	0.04	2.6688	0.8526	nan	nan
1	764596	764698	RLOC_00000251	.	+	146.88	0.1937	0.1401	0.346	0.04922
1	764065	764156	RLOC_00000251	.	+	121.06	0.0032	0.9026	0.955	0.04922
1	763429	763979	RLOC_00000251	.	+	123.52	-0.2559	0.466	0.6813	0.04922
1	765254	765484	RLOC_00000251	.	+	237.66	-0.3085	0.08104	0.252	0.04922
1	764930	765024	RLOC_00000251	.	+	0.25	10.5370	0.9123	nan	0.04922
1	765599	765752	RLOC_00000251	.	+	313.00	-0.6057	0.001831	0.02549	0.04922
1	762627	763012	RLOC_00000251	.	+	8.42	0.5927	0.2559	0.4878	0.04922
1	762577	763012	RLOC_00000251	.	+	78.79	0.5683	0.01585	0.09511	0.04922
1	763429	764156	RLOC_00000251	.	+	1.54	2.0589	0.6185	nan	0.04922
1	766379	767141	RLOC_00000251	.	+	3.02	3.1466	0.02269	nan	0.04922
1	764865	765024	RLOC_00000251	.	+	205.21	-0.0188	0.7411	0.8674	0.04922
1	761809	761885	RLOC_00000251	.	+	134.75	0.4573	0.04581	0.18	0.04922
1	762390	762509	RLOC_00000251	.	+	99.35	0.5186	0.009795	0.07138	0.04922
1	764830	765024	RLOC_00000251	.	+	9.39	-1.0035	0.1075	0.2973	0.04922
1	763209	763298	RLOC_00000251	.	+	105.87	0.2714	0.1236	0.3223	0.04922
1	767150	767296	RLOC_00000252	.	-	0.00	nan	nan	nan	nan
1	774699	774784	RLOC_00000254	.	+	21.30	0.2076	0.7115	0.8493	0.8813
1	774152	774223	RLOC_00000254	.	+	2.49	2.3248	0.06578	nan	0.8813
1	773690	774095	RLOC_00000254	.	+	15.20	0.0065	0.8962	0.9521	0.8813
1	774152	774230	RLOC_00000254	.	+	13.33	-0.2412	0.5921	0.773	0.8813
1	774878	774967	RLOC_00000254	.	+	27.14	-0.1403	0.8387	0.9219	0.8813
1	774538	774651	RLOC_00000254	.	+	24.77	0.2137	0.4929	0.7022	0.8813
1	775046	775121	RLOC_00000254	.	+	28.59	-0.5295	0.2264	0.4553	0.8813
1	773413	773498	RLOC_00000254	.	+	0.65	12.1418	0.5104	nan	0.8813
1	774152	774246	RLOC_00000254	.	+	0.00	nan	nan	nan	0.8813
1	778064	778152	RLOC_00000255	.	+	24.46	0.1635	0.488	0.6984	0.6992
1	778609	778806	RLOC_00000255	.	+	32.44	-0.1720	0.8964	0.9522	0.6992
1	777236	777335	RLOC_00000255	.	+	36.47	-0.0629	0.7874	0.8935	0.6992
1	776354	776481	RLOC_00000255	.	+	23.45	0.3313	0.3145	0.5479	0.6992
1	778332	778485	RLOC_00000255	.	+	29.21	-0.2341	0.8636	0.9352	0.6992
1	779249	779537	RLOC_00000255	.	+	60.26	-0.3133	0.342	0.5741	0.6992
1	776761	777154	RLOC_00000255	.	+	20.04	0.2201	0.5445	0.7402	0.6992
1	779645	779743	RLOC_00000255	.	+	87.29	-0.4866	0.1135	0.3069	0.6992
1	778895	779001	RLOC_00000255	.	+	46.65	0.1360	0.4643	0.68	0.6992
1	777738	777871	RLOC_00000255	.	+	31.19	0.6507	0.1136	0.307	0.6992
1	779079	779173	RLOC_00000255	.	+	43.53	0.1109	0.5263	0.7272	0.6992
1	775648	775807	RLOC_00000255	.	+	23.53	0.4848	0.3202	0.5533	0.6992
1	783174	783317	RLOC_00000257	.	+	37.90	-0.0167	0.8675	0.9372	0.5643
1	783841	783942	RLOC_00000257	.	+	85.78	-0.1188	0.6536	0.8141	0.5643
1	783595	783680	RLOC_00000257	.	+	54.79	0.0892	0.9435	0.9749	0.5643
1	781176	782925	RLOC_00000257	.	+	8.90	0.2501	0.7919	0.8959	0.5643
1	784025	784132	RLOC_00000257	.	+	76.44	-0.2680	0.1156	0.3102	0.5643
1	780835	781080	RLOC_00000257	.	+	62.71	0.6657	0.07097	0.2332	0.5643
1	787313	790248	RLOC_00000258	.	+	1.07	0.2822	1	nan	nan
1	787386	790228	RLOC_00000258	.	+	0.69	0.2081	0.4916	nan	nan
1	788430	791353	RLOC_00000258	.	+	0.31	-13.0158	0.6921	nan	nan
1	787327	790259	RLOC_00000258	.	+	0.19	-12.2636	0.707	nan	nan
1	787514	787588	RLOC_00000258	.	+	0.76	-14.2679	0.6772	nan	nan
1	788246	791128	RLOC_00000258	.	+	0.27	-12.8613	0.6939	nan	nan
1	787907	788148	RLOC_00000258	.	+	0.14	2.0930	0.5294	nan	nan
1	788336	791310	RLOC_00000258	.	+	0.93	-14.4687	0.6697	nan	nan
1	787290	790228	RLOC_00000258	.	+	0.34	0.0382	0.5003	nan	nan
1	787291	798245	RLOC_00000258	.	+	0.26	-12.5933	0.6746	nan	nan
1	787386	790200	RLOC_00000258	.	+	0.08	14.2467	0.5617	nan	nan
1	787647	790534	RLOC_00000258	.	+	0.19	15.5004	0.5174	nan	nan
1	788058	790999	RLOC_00000258	.	+	0.04	13.4500	0.6267	nan	nan
1	787313	790248	RLOC_00000259	.	+	1.07	0.3451	1	nan	nan
1	787386	790228	RLOC_00000259	.	+	0.69	0.2910	0.4885	nan	nan
1	788430	791353	RLOC_00000259	.	+	0.31	-12.8812	0.7318	nan	nan
1	787327	790259	RLOC_00000259	.	+	0.19	-12.1315	0.7452	nan	nan
1	788246	791128	RLOC_00000259	.	+	0.27	-12.7268	0.7338	nan	nan
1	788336	791310	RLOC_00000259	.	+	0.93	-14.3329	0.7162	nan	nan
1	787290	790228	RLOC_00000259	.	+	0.34	0.1173	0.5557	nan	nan
1	787291	798245	RLOC_00000259	.	+	0.26	-12.4575	0.7151	nan	nan
1	787386	790200	RLOC_00000259	.	+	0.08	14.2694	0.5928	nan	nan
1	787647	790534	RLOC_00000259	.	+	0.19	15.5229	0.5445	nan	nan
1	788058	790999	RLOC_00000259	.	+	0.04	13.4726	0.6547	nan	nan
1	792460	792753	RLOC_00000260	.	-	0.47	nan	nan	nan	nan
1	796017	796535	RLOC_00000261	.	-	58.88	-0.2434	0.3496	0.5814	0.5016
1	794968	795101	RLOC_00000261	.	-	168.50	0.0523	0.8164	0.9095	0.5016
1	793929	794021	RLOC_00000261	.	-	195.99	-0.0549	0.8463	0.9258	0.5016
1	797126	797312	RLOC_00000261	.	-	62.28	-0.0053	0.9945	0.9979	0.5016
1	794197	794327	RLOC_00000261	.	-	2.22	0.6209	0.3137	nan	0.5016
1	796891	797040	RLOC_00000261	.	-	64.04	-0.3123	0.1912	0.413	0.5016
1	794409	794541	RLOC_00000261	.	-	166.68	0.2547	0.1251	0.3246	0.5016
1	794179	794327	RLOC_00000261	.	-	150.51	0.1173	0.7281	0.8594	0.5016
1	796627	796775	RLOC_00000261	.	-	45.31	-0.3713	0.1891	0.4104	0.5016
1	797410	797545	RLOC_00000261	.	-	57.48	0.0773	0.7245	0.8571	0.5016
1	797599	797727	RLOC_00000261	.	-	54.38	0.1084	0.6436	0.8075	0.5016
1	795855	795987	RLOC_00000261	.	-	83.47	-0.3809	0.05673	0.2046	0.5016
1	793730	793828	RLOC_00000261	.	-	258.25	0.2122	0.08536	0.2598	0.5016
1	797788	798000	RLOC_00000261	.	-	41.96	0.2032	0.5946	0.7745	0.5016
1	794649	794898	RLOC_00000261	.	-	219.33	-0.1646	0.1904	0.4121	0.5016
1	800699	800971	RLOC_00000262	.	+	12.56	-0.1382	0.8323	0.9185	0.4942
1	801888	802011	RLOC_00000262	.	+	14.49	-0.4744	0.4012	0.6275	0.4942
1	799430	799640	RLOC_00000262	.	+	8.71	0.7578	0.246	0.4774	0.4942
1	800111	800381	RLOC_00000262	.	+	16.59	0.1786	0.2354	0.4654	0.4942
1	800464	800628	RLOC_00000262	.	+	12.51	0.4453	0.351	0.5827	0.4942
1	799909	799998	RLOC_00000262	.	+	8.80	0.5078	0.2873	0.5207	0.4942
1	799716	799826	RLOC_00000262	.	+	9.44	0.1916	0.585	0.7682	0.4942
1	801038	801184	RLOC_00000262	.	+	13.32	-0.5973	0.247	0.4784	0.4942
1	802057	802162	RLOC_00000262	.	+	17.21	-0.6938	0.05519	0.2012	0.4942
1	801271	801355	RLOC_00000262	.	+	16.21	0.2620	0.5983	0.7771	0.4942
1	801428	801516	RLOC_00000262	.	+	14.49	0.3937	0.2879	0.5214	0.4942
1	802222	802319	RLOC_00000262	.	+	19.01	-0.1913	0.5417	0.7382	0.4942
1	803116	803542	RLOC_00000263	.	+	1.98	2.9091	0.09076	nan	0.0007218
1	803116	803564	RLOC_00000263	.	+	112.65	0.4978	0.001965	0.02658	0.0007218
1	803281	803564	RLOC_00000263	.	+	1.12	1.2284	0.5772	nan	0.0007218
1	803686	803834	RLOC_00000263	.	+	211.44	0.0479	0.2393	0.4699	0.0007218
1	804366	804738	RLOC_00000263	.	+	224.70	0.1945	0.04939	0.1884	0.0007218
1	803956	804246	RLOC_00000263	.	+	136.24	0.5082	0.004991	0.04732	0.0007218
1	805651	805859	RLOC_00000263	.	+	217.81	-0.1950	0.4287	0.6508	0.0007218
1	804851	804960	RLOC_00000263	.	+	220.97	0.0399	0.3737	0.6031	0.0007218
1	806086	806195	RLOC_00000263	.	+	328.56	-0.1908	0.3663	0.5969	0.0007218
1	806408	806660	RLOC_00000263	.	+	403.26	-0.9518	4.415e-06	0.0005319	0.0007218
1	805069	805166	RLOC_00000263	.	+	124.36	0.1912	0.09387	0.2748	0.0007218
1	805349	805457	RLOC_00000263	.	+	204.06	0.1964	0.08847	0.2654	0.0007218
1	803116	803200	RLOC_00000263	.	+	2.70	1.6082	0.1516	nan	0.0007218
1	810089	810187	RLOC_00000264	.	+	191.38	-0.2271	0.2063	0.4324	0.3585
1	809213	809408	RLOC_00000264	.	+	124.09	0.0649	0.5957	0.7753	0.3585
1	809581	809671	RLOC_00000264	.	+	214.32	-0.1198	0.3503	0.5821	0.3585
1	808393	808531	RLOC_00000264	.	+	111.88	0.2662	0.2634	0.4957	0.3585
1	809787	809910	RLOC_00000264	.	+	242.89	-0.0019	0.8056	0.9038	0.3585
1	807509	807950	RLOC_00000264	.	+	40.70	0.6404	0.0687	0.2288	0.3585
1	808821	808912	RLOC_00000264	.	+	1.81	2.1095	0.09841	nan	0.3585
1	808821	808978	RLOC_00000264	.	+	3.87	1.6886	0.1045	nan	0.3585
1	810233	810379	RLOC_00000264	.	+	237.72	-0.2929	0.03193	0.1447	0.3585
1	807509	807591	RLOC_00000264	.	+	6.63	-0.0253	0.3357	nan	0.3585
1	807630	807950	RLOC_00000264	.	+	43.39	0.2081	0.3918	0.619	0.3585
1	808016	808228	RLOC_00000264	.	+	108.13	0.4036	0.0447	0.1774	0.3585
1	811987	812029	RLOC_00000265	.	-	0.00	nan	nan	nan	nan
1	813580	813928	RLOC_00000266	.	+	51.28	0.0235	0.8209	0.912	1
1	813603	813928	RLOC_00000266	.	+	71.52	-0.0183	0.8306	0.9175	1
1	817095	817174	RLOC_00000267	.	+	0.88	nan	nan	nan	nan
1	807756	823279	RLOC_00000268	.	-	0.16	nan	nan	nan	nan
1	818279	818919	RLOC_00000269	.	-	398.98	0.0004	0.9038	0.9557	1
1	819077	819294	RLOC_00000269	.	-	551.90	-0.0004	0.9003	0.954	1
1	820076	820158	RLOC_00000270	.	+	21.22	-0.2232	0.522	0.7241	0.9872
1	819782	819896	RLOC_00000270	.	+	15.85	-0.1722	0.4353	0.6567	0.9872
1	820500	820594	RLOC_00000270	.	+	22.41	0.2599	0.493	0.7023	0.9872
1	820665	820737	RLOC_00000270	.	+	22.80	0.0605	0.9789	0.9908	0.9872
1	818279	818919	RLOC_00000271	.	-	0.15	-15.9762	0.7764	nan	nan
1	818956	828944	RLOC_00000271	.	-	0.15	-15.9765	0.7764	nan	nan
1	823528	833036	RLOC_00000271	.	-	0.25	9.0536	0.9956	nan	nan
1	823530	838506	RLOC_00000271	.	-	0.25	9.0536	0.9956	nan	nan
1	807756	823279	RLOC_00000271	.	-	0.16	8.3771	0.9114	nan	nan
1	825654	825744	RLOC_00000272	.	+	65.24	-0.3119	0.1203	0.3174	0.6111
1	824991	825101	RLOC_00000272	.	+	57.88	0.1651	0.5641	0.7537	0.6111
1	824812	824890	RLOC_00000272	.	+	63.39	0.0282	0.6976	0.8411	0.6111
1	825146	825252	RLOC_00000272	.	+	51.12	0.5333	0.08378	0.257	0.6111
1	825486	825586	RLOC_00000272	.	+	66.99	-0.2438	0.1121	0.3046	0.6111
1	825341	825421	RLOC_00000272	.	+	54.09	0.2524	0.3084	0.5419	0.6111
1	826736	827178	RLOC_00000273	.	+	52.93	0.9247	0.0007706	0.0151	0.02683
1	826736	829720	RLOC_00000273	.	+	6.04	-1.9385	0.1865	nan	0.02683
1	829181	829720	RLOC_00000273	.	+	121.33	-0.4578	0.005556	0.05059	0.02683
1	833569	833693	RLOC_00000274	.	+	36.51	-0.1713	0.8342	0.9195	0.3025
1	832934	833083	RLOC_00000274	.	+	38.23	-0.0824	0.8387	0.9219	0.3025
1	834418	834513	RLOC_00000274	.	+	73.41	-0.6232	0.02463	0.1238	0.3025
1	831312	831419	RLOC_00000274	.	+	18.70	0.5363	0.07668	0.244	0.3025
1	833955	834253	RLOC_00000274	.	+	30.45	0.1918	0.3132	0.5465	0.3025
1	832639	832752	RLOC_00000274	.	+	36.35	0.0615	0.548	0.7429	0.3025
1	833366	833453	RLOC_00000274	.	+	48.78	0.2993	0.06919	0.2298	0.3025
1	838313	838399	RLOC_00000275	.	+	164.97	0.0656	0.2876	0.5211	0.002459
1	840410	840507	RLOC_00000275	.	+	277.70	-0.8066	2.609e-05	0.001736	0.002459
1	841745	841999	RLOC_00000275	.	+	0.00	nan	nan	nan	0.002459
1	839226	839311	RLOC_00000275	.	+	186.04	-0.0403	0.7391	0.8663	0.002459
1	837907	838068	RLOC_00000275	.	+	193.58	0.3809	0.001625	0.0237	0.002459
1	836327	836768	RLOC_00000275	.	+	79.40	0.5874	0.009251	0.06893	0.002459
1	837232	837470	RLOC_00000275	.	+	148.07	0.4945	0.005257	0.04896	0.002459
1	839468	839677	RLOC_00000275	.	+	186.73	-0.1954	0.449	0.6678	0.002459
1	839804	839919	RLOC_00000275	.	+	201.58	-0.1659	0.5793	0.7644	0.002459
1	843145	843230	RLOC_00000277	.	-	189.65	0.0549	0.5751	0.7615	1
1	843551	843676	RLOC_00000277	.	-	164.63	-0.0579	0.5821	0.7664	1
1	845434	845951	RLOC_00000278	.	-	31.87	-0.2597	0.1591	0.3724	0.525
1	845032	845113	RLOC_00000278	.	-	25.50	0.6717	0.06162	0.2147	0.525
1	846476	846729	RLOC_00000278	.	-	13.40	-0.2953	0.3787	0.6073	0.525
1	848496	848641	RLOC_00000279	.	+	164.71	0.2519	0.1528	0.3643	0.4659
1	849069	849178	RLOC_00000279	.	+	243.97	-0.4003	0.04947	0.1886	0.4659
1	848878	848997	RLOC_00000279	.	+	245.19	-0.2231	0.08837	0.2651	0.4659
1	848226	848366	RLOC_00000279	.	+	121.17	0.2555	0.05096	0.1919	0.4659
1	848712	848807	RLOC_00000279	.	+	209.19	0.1776	0.07154	0.2343	0.4659
1	853877	854592	RLOC_00000280	.	+	0.07	-21.1866	0.615	nan	nan
1	847067	852960	RLOC_00000280	.	+	0.06	2.4301	0.9183	nan	nan
1	852761	852829	RLOC_00000280	.	+	0.16	3.6805	0.8874	nan	nan
1	854932	855030	RLOC_00000280	.	+	0.16	3.6805	0.8874	nan	nan
1	855165	855254	RLOC_00000280	.	+	0.08	2.6758	0.8433	nan	nan
1	853507	853578	RLOC_00000280	.	+	0.16	3.8115	0.9684	nan	nan
1	857092	857278	RLOC_00000281	.	-	0.28	14.6189	0.382	nan	nan
1	858039	858119	RLOC_00000281	.	-	0.11	-11.2876	1	nan	nan
1	856650	856758	RLOC_00000281	.	-	0.27	0.6971	0.6459	nan	nan
1	858692	858776	RLOC_00000281	.	-	1.50	2.1122	0.7242	nan	nan
1	855329	855404	RLOC_00000281	.	-	1.85	0.3487	0.7774	nan	nan
1	854705	854802	RLOC_00000281	.	-	2.25	-1.0985	1	nan	nan
1	858849	859000	RLOC_00000281	.	-	0.22	-12.2497	1	nan	nan
1	856293	856369	RLOC_00000281	.	-	1.36	-1.9993	1	nan	nan
1	859291	859397	RLOC_00000281	.	-	0.25	14.2026	0.7665	nan	nan
1	855600	855687	RLOC_00000281	.	-	1.64	-0.2972	0.8891	nan	nan
1	857798	857970	RLOC_00000281	.	-	0.15	-0.2113	0.8513	nan	nan
1	855165	855254	RLOC_00000281	.	-	1.36	0.2925	0.4757	nan	nan
1	858215	858598	RLOC_00000281	.	-	0.53	15.4629	0.5067	nan	nan
1	854932	855030	RLOC_00000281	.	-	2.81	-1.5917	0.2841	nan	nan
1	856839	857012	RLOC_00000281	.	-	0.08	12.6773	0.7383	nan	nan
1	859078	859231	RLOC_00000281	.	-	0.00	nan	nan	nan	nan
1	856443	856539	RLOC_00000281	.	-	0.70	-1.8187	0.9269	nan	nan
1	855942	856055	RLOC_00000281	.	-	0.67	0.9275	0.5692	nan	nan
1	857436	857546	RLOC_00000281	.	-	0.53	1.5639	0.4651	nan	nan
1	855785	855858	RLOC_00000281	.	-	0.20	14.1187	0.4673	nan	nan
1	857627	857703	RLOC_00000281	.	-	0.59	1.7174	0.6669	nan	nan
1	861908	862041	RLOC_00000282	.	-	24.87	0.1025	0.6676	0.8229	0.157
1	862211	862313	RLOC_00000282	.	-	31.57	-0.3530	0.2874	0.5208	0.157
1	862612	862752	RLOC_00000282	.	-	20.55	0.7317	0.2108	0.4376	0.157
1	863540	863859	RLOC_00000282	.	-	31.73	0.9503	0.009253	0.06894	0.157
1	862803	863458	RLOC_00000282	.	-	23.71	0.9075	0.04641	0.1815	0.157
1	861277	861367	RLOC_00000282	.	-	35.64	-0.4645	0.09946	0.2843	0.157
1	861510	861605	RLOC_00000282	.	-	39.91	-0.3303	0.2072	0.4335	0.157
1	862639	862752	RLOC_00000282	.	-	10.70	-0.6850	0.1989	0.423	0.157
1	862392	862487	RLOC_00000282	.	-	31.47	-0.3515	0.1842	0.4043	0.157
1	867519	867625	RLOC_00000283	.	-	0.00	nan	nan	nan	0.9976
1	867510	867629	RLOC_00000283	.	-	13.66	-0.0351	0.8786	0.9432	0.9976
1	867519	867629	RLOC_00000283	.	-	6.20	0.8315	0.1664	nan	0.9976
1	866940	867408	RLOC_00000283	.	-	29.16	-0.2138	0.488	0.6984	0.9976
1	870226	870312	RLOC_00000284	.	-	541.79	0.2391	0.1019	0.2884	0.2086
1	869961	870143	RLOC_00000284	.	-	537.22	-0.0009	0.9925	0.9972	0.2086
1	870570	870650	RLOC_00000284	.	-	945.09	0.1274	0.1959	0.4194	0.2086
1	869781	869874	RLOC_00000284	.	-	769.75	0.0303	0.5999	0.7782	0.2086
1	870406	870495	RLOC_00000284	.	-	567.06	0.0510	0.6656	0.8216	0.2086
1	869551	869657	RLOC_00000284	.	-	679.59	-0.0622	0.4957	0.7042	0.2086
1	869369	869453	RLOC_00000284	.	-	1127.56	-0.2459	0.01401	0.08834	0.2086
1	872392	872444	RLOC_00000285	.	+	0.00	nan	nan	nan	nan
1	872681	872739	RLOC_00000285	.	+	0.00	nan	nan	nan	nan
1	872211	872291	RLOC_00000285	.	+	0.00	nan	nan	nan	nan
1	875449	875549	RLOC_00000287	.	-	1.24	nan	nan	nan	nan
1	876552	876620	RLOC_00000288	.	-	0.15	nan	nan	nan	nan
1	878455	878539	RLOC_00000290	.	-	65.71	0.1392	0.4396	0.6605	0.989
1	878809	878910	RLOC_00000290	.	-	85.41	-0.0727	0.6662	0.822	0.989
1	879299	879931	RLOC_00000290	.	-	2.18	-2.6086	0.3041	nan	0.989
1	878654	878734	RLOC_00000290	.	-	81.76	0.0024	0.9803	0.9913	0.989
1	881875	881977	RLOC_00000291	.	-	56.69	-0.1005	0.6185	0.7914	1
1	882054	882249	RLOC_00000291	.	-	57.02	0.1010	0.6178	0.7909	1
1	886607	886702	RLOC_00000292	.	+	13.20	0.1909	0.7736	0.8858	1
1	887157	887807	RLOC_00000292	.	+	0.00	nan	nan	nan	1
1	886862	886991	RLOC_00000292	.	+	11.61	-0.2036	0.7788	0.8889	1
1	885936	886034	RLOC_00000293	.	-	63.92	-0.3030	0.4	0.6265	1.228e-10
1	887136	887224	RLOC_00000293	.	-	44.76	-0.3113	0.195	0.4183	1.228e-10
1	887429	887530	RLOC_00000293	.	-	43.18	-0.2410	0.3944	0.6215	1.228e-10
1	886939	887014	RLOC_00000293	.	-	37.10	-0.1636	0.8245	0.9141	1.228e-10
1	886598	886695	RLOC_00000293	.	-	47.35	-0.1334	0.828	0.9161	1.228e-10
1	887634	887724	RLOC_00000293	.	-	36.68	-1.1941	0.0602	0.212	1.228e-10
1	889523	889768	RLOC_00000293	.	-	15.64	2.8970	2.904e-14	8.812e-11	1.228e-10
1	886099	886195	RLOC_00000293	.	-	42.55	-0.3683	0.3365	0.5691	1.228e-10
1	886243	886392	RLOC_00000293	.	-	36.09	0.1366	0.8306	0.9174	1.228e-10
1	887257	887367	RLOC_00000293	.	-	47.90	-0.0947	0.5361	0.7345	1.228e-10
1	886459	886553	RLOC_00000293	.	-	40.67	0.3074	0.3164	0.5496	1.228e-10
1	886788	886877	RLOC_00000293	.	-	44.54	-0.5446	0.2023	0.4273	1.228e-10
1	879042	891123	RLOC_00000294	.	-	1.39	-1.4688	0.8996	nan	nan
1	879898	899318	RLOC_00000294	.	-	0.11	2.0681	0.8909	nan	nan
1	882987	896160	RLOC_00000294	.	-	0.13	2.0489	0.8541	nan	nan
1	879284	899248	RLOC_00000295	.	+	0.10	-8.8395	0.8639	nan	nan
1	879898	899318	RLOC_00000295	.	+	0.06	-8.2429	0.9184	nan	nan
1	885478	893637	RLOC_00000295	.	+	0.06	-8.2429	0.9184	nan	nan
1	886737	899182	RLOC_00000295	.	+	0.08	14.1301	0.8206	nan	nan
1	883584	901149	RLOC_00000295	.	+	0.04	13.4000	0.8206	nan	nan
1	892952	893042	RLOC_00000296	.	+	4.71	0.5002	0.3673	nan	0.9405
1	893205	893284	RLOC_00000296	.	+	17.33	0.1072	0.4205	0.6442	0.9405
1	893489	893568	RLOC_00000296	.	+	26.28	-0.3145	0.3057	0.5391	0.9405
1	894943	895029	RLOC_00000297	.	-	153.75	-0.5064	0.02235	0.117	0.2841
1	895252	895354	RLOC_00000297	.	-	193.32	-0.0918	0.8811	0.9445	0.2841
1	895471	895582	RLOC_00000297	.	-	158.89	0.1156	0.242	0.4727	0.2841
1	896481	897355	RLOC_00000297	.	-	68.87	0.1281	0.3663	0.5969	0.2841
1	896481	897221	RLOC_00000297	.	-	6.17	0.8132	0.1878	nan	0.2841
1	895920	896014	RLOC_00000297	.	-	128.31	0.2500	0.114	0.3076	0.2841
1	897663	908946	RLOC_00000298	.	+	0.15	-10.9415	1	nan	nan
1	909009	909089	RLOC_00000298	.	+	0.45	-12.3417	0.7137	nan	nan
1	897666	901556	RLOC_00000298	.	+	0.08	-10.0094	0.9174	nan	nan
1	899015	915779	RLOC_00000298	.	+	0.15	-10.9965	0.9402	nan	nan
1	899083	899331	RLOC_00000298	.	+	0.15	-10.9965	0.9402	nan	nan
1	899559	904747	RLOC_00000298	.	+	0.08	-10.0094	0.9174	nan	nan
1	879284	899248	RLOC_00000298	.	+	0.10	-10.2136	0.902	nan	nan
1	899475	899544	RLOC_00000298	.	+	0.10	-10.2136	0.902	nan	nan
1	893158	902582	RLOC_00000298	.	+	0.07	-9.8818	0.9161	nan	nan
1	896286	898956	RLOC_00000298	.	+	0.07	-9.8818	0.9161	nan	nan
1	899447	914294	RLOC_00000298	.	+	0.41	-12.4107	1	nan	nan
1	879898	899318	RLOC_00000298	.	+	0.06	-9.6778	0.9238	nan	nan
1	899268	899413	RLOC_00000298	.	+	0.17	-11.1971	0.9372	nan	nan
1	897662	908945	RLOC_00000298	.	+	0.15	-10.6300	0.9095	nan	nan
1	899558	908945	RLOC_00000298	.	+	0.15	-10.6300	0.9095	nan	nan
1	896986	908987	RLOC_00000298	.	+	0.13	-10.4841	0.9075	nan	nan
1	899650	903626	RLOC_00000298	.	+	0.13	-10.4841	0.9075	nan	nan
1	899650	917319	RLOC_00000298	.	+	0.13	-10.4841	0.9075	nan	nan
1	899631	915339	RLOC_00000298	.	+	0.13	19.1372	0.7179	nan	nan
1	899031	899112	RLOC_00000298	.	+	0.17	19.7291	0.6789	nan	nan
1	894202	908716	RLOC_00000298	.	+	0.06	18.4243	0.719	nan	nan
1	898380	898885	RLOC_00000298	.	+	0.06	18.4243	0.719	nan	nan
1	886737	899182	RLOC_00000298	.	+	0.08	18.6411	0.7032	nan	nan
1	899084	899388	RLOC_00000298	.	+	0.16	19.6466	0.6219	nan	nan
1	899219	899313	RLOC_00000298	.	+	0.16	19.6466	0.6219	nan	nan
1	899178	899294	RLOC_00000298	.	+	0.16	19.6466	0.6219	nan	nan
1	883584	901149	RLOC_00000298	.	+	0.04	17.9537	0.7469	nan	nan
1	899163	899416	RLOC_00000298	.	+	0.24	20.4401	0.5472	nan	nan
1	899158	899329	RLOC_00000298	.	+	0.08	18.9157	0.6675	nan	nan
1	898788	898894	RLOC_00000299	.	-	2.14	nan	nan	nan	nan
1	901395	901485	RLOC_00000300	.	+	662.31	0.2066	0.06125	0.2141	0.2428
1	902076	902169	RLOC_00000300	.	+	1008.32	-0.1048	0.1158	0.3105	0.2428
1	902346	902424	RLOC_00000300	.	+	788.22	-0.1813	0.02095	0.1125	0.2428
1	901705	901890	RLOC_00000300	.	+	749.03	0.1400	0.01758	0.1011	0.2428
1	906022	906313	RLOC_00000301	.	-	8.24	0.8238	0.1553	0.3675	0.2399
1	906355	907127	RLOC_00000301	.	-	0.86	-13.9305	0.3001	nan	0.2399
1	904419	904520	RLOC_00000301	.	-	44.42	-0.7002	0.01722	0.09994	0.2399
1	906022	907127	RLOC_00000301	.	-	1.51	0.3708	0.9077	nan	0.2399
1	905382	905496	RLOC_00000301	.	-	20.04	0.7733	0.01916	0.1066	0.2399
1	904774	904880	RLOC_00000301	.	-	27.95	-0.1583	0.7063	0.8462	0.2399
1	905003	905118	RLOC_00000301	.	-	26.56	-0.1252	0.9755	0.9892	0.2399
1	905564	905666	RLOC_00000301	.	-	23.85	0.5804	0.08913	0.2665	0.2399
1	907461	907621	RLOC_00000301	.	-	3.04	-0.7495	0.5681	nan	0.2399
1	905783	905910	RLOC_00000301	.	-	0.44	1.2734	0.7948	nan	0.2399
1	905783	905942	RLOC_00000301	.	-	12.31	0.7943	0.1415	0.3479	0.2399
1	906022	906134	RLOC_00000301	.	-	3.96	1.4577	0.06581	nan	0.2399
1	904614	904727	RLOC_00000301	.	-	41.01	-0.3548	0.2677	0.5002	0.2399
1	906360	907127	RLOC_00000301	.	-	0.16	11.2423	0.8951	nan	0.2399
1	905172	905267	RLOC_00000301	.	-	24.43	-0.1698	0.8222	0.9127	0.2399
1	908569	908654	RLOC_00000302	.	+	1426.17	-0.0778	0.5079	0.7133	0.001578
1	907754	907848	RLOC_00000302	.	+	1456.90	0.4620	5.529e-05	0.002862	0.001578
1	909009	909089	RLOC_00000302	.	+	2360.00	-0.5994	1.36e-05	0.001128	0.001578
1	907946	908032	RLOC_00000302	.	+	1514.63	0.2842	0.0006581	0.0136	0.001578
1	907946	908038	RLOC_00000302	.	+	43.62	0.0116	0.8318	0.9181	0.001578
1	911920	912082	RLOC_00000304	.	-	1.29	-3.1801	0.3586	nan	1
1	913530	913653	RLOC_00000304	.	-	1.50	-0.1536	0.4078	nan	1
1	910480	910859	RLOC_00000304	.	-	44.20	0.0168	0.7998	0.9004	1
1	913235	913350	RLOC_00000304	.	-	1.60	2.1091	0.07701	nan	1
1	911920	913165	RLOC_00000304	.	-	1.79	-0.1225	0.9153	nan	1
1	899015	915779	RLOC_00000305	.	+	0.15	-4.4169	0.9666	nan	nan
1	899447	914294	RLOC_00000305	.	+	0.41	-5.8071	0.9734	nan	nan
1	899650	917319	RLOC_00000305	.	+	0.13	-4.0381	0.9232	nan	nan
1	899631	915339	RLOC_00000305	.	+	0.13	19.4717	0.6385	nan	nan
1	914838	914908	RLOC_00000306	.	-	0.00	nan	nan	nan	nan
1	915455	915537	RLOC_00000306	.	-	0.00	nan	nan	nan	nan
1	917302	917639	RLOC_00000307	.	-	3245.43	nan	nan	nan	nan
1	919187	919266	RLOC_00000308	.	+	50.09	0.1998	0.3338	0.5666	0.8391
1	919608	919736	RLOC_00000308	.	+	47.17	-0.3162	0.3372	0.5698	0.8391
1	919816	919912	RLOC_00000308	.	+	65.50	-0.2847	0.2739	0.5067	0.8391
1	919392	919502	RLOC_00000308	.	+	60.35	0.1843	0.2897	0.5234	0.8391
1	919994	920086	RLOC_00000308	.	+	96.06	-0.1264	0.5854	0.7685	0.8391
1	918600	918867	RLOC_00000308	.	+	36.34	0.3272	0.1892	0.4106	0.8391
1	919007	919095	RLOC_00000308	.	+	46.17	0.0732	0.6307	0.7995	0.8391
1	921400	921610	RLOC_00000309	.	+	13.05	-0.3236	0.2353	0.4652	0.8896
1	921194	921298	RLOC_00000309	.	+	12.21	0.3226	0.2365	0.4666	0.8896
1	924311	924469	RLOC_00000310	.	+	1.33	0.8333	1	nan	nan
1	923754	923827	RLOC_00000310	.	+	4.45	-1.2721	0.1623	nan	nan
1	923976	924092	RLOC_00000310	.	+	3.44	1.0608	0.2929	nan	nan
1	925207	925278	RLOC_00000311	.	-	0.00	nan	nan	nan	nan
1	925207	925302	RLOC_00000311	.	-	0.00	nan	nan	nan	nan
1	925779	926159	RLOC_00000311	.	-	0.00	nan	nan	nan	nan
1	925445	925550	RLOC_00000311	.	-	0.00	nan	nan	nan	nan
1	918473	932345	RLOC_00000312	.	-	0.06	nan	nan	nan	nan
1	918473	932345	RLOC_00000313	.	-	0.06	nan	nan	nan	nan
1	935480	935569	RLOC_00000314	.	+	66.24	-0.1478	0.4272	0.6495	0.8978
1	934707	934784	RLOC_00000314	.	+	77.24	0.1623	0.2452	0.4765	0.8978
1	935796	935881	RLOC_00000314	.	+	84.03	0.2087	0.2667	0.4992	0.8978
1	936571	936654	RLOC_00000314	.	+	105.09	-0.1824	0.3234	0.5563	0.8978
1	936096	936188	RLOC_00000314	.	+	114.48	-0.0615	0.6203	0.7927	0.8978
1	935068	935163	RLOC_00000314	.	+	51.85	0.0939	0.5373	0.7351	0.8978
1	940677	940772	RLOC_00000318	.	+	42.82	-0.7777	0.01285	0.08391	0.1967
1	938529	938633	RLOC_00000318	.	+	10.83	1.0558	0.07287	0.2369	0.1967
1	939799	939875	RLOC_00000318	.	+	23.00	-0.1425	0.7087	0.8476	0.1967
1	940366	940452	RLOC_00000318	.	+	30.44	-0.3784	0.4881	0.6985	0.1967
1	938308	938423	RLOC_00000318	.	+	14.29	0.8887	0.1539	0.3657	0.1967
1	940001	940091	RLOC_00000318	.	+	19.83	0.5224	0.1456	0.3539	0.1967
1	941571	941693	RLOC_00000319	.	-	76.45	-0.2863	0.1044	0.2923	0.2817
1	942104	942186	RLOC_00000319	.	-	51.01	0.4569	0.09234	0.272	0.2817
1	942566	942652	RLOC_00000319	.	-	27.37	0.5394	0.1455	0.3539	0.2817
1	943038	943122	RLOC_00000319	.	-	30.13	0.9958	0.1111	0.3031	0.2817
1	941430	941536	RLOC_00000319	.	-	84.84	-0.4580	0.02207	0.1161	0.2817
1	941947	942030	RLOC_00000319	.	-	70.19	0.0969	0.8012	0.9012	0.2817
1	942819	942979	RLOC_00000319	.	-	24.30	0.5978	0.3653	0.5959	0.2817
1	941266	941365	RLOC_00000319	.	-	70.96	-0.2003	0.3409	0.5732	0.2817
1	941793	941914	RLOC_00000319	.	-	74.18	-0.0881	0.6675	0.8229	0.2817
1	947292	947398	RLOC_00000320	.	+	54.72	-0.8124	0.05718	0.2056	0.3046
1	945860	945951	RLOC_00000320	.	+	23.38	-0.2745	0.3726	0.6022	0.3046
1	945167	945471	RLOC_00000320	.	+	20.81	0.6439	0.0942	0.2753	0.3046
1	944981	945110	RLOC_00000320	.	+	6.63	1.1490	0.1943	nan	0.3046
1	947000	947122	RLOC_00000320	.	+	63.59	-0.5562	0.08671	0.262	0.3046
1	946071	946168	RLOC_00000320	.	+	19.74	0.7955	0.02599	0.1278	0.3046
1	946811	946893	RLOC_00000320	.	+	45.15	-0.1413	0.61	0.7854	0.3046
1	944981	945116	RLOC_00000320	.	+	9.32	0.8914	0.02841	0.1347	0.3046
1	947018	947122	RLOC_00000320	.	+	0.08	8.2968	0.9475	nan	0.3046
1	945529	945779	RLOC_00000320	.	+	19.88	-0.0306	0.7177	0.8532	0.3046
1	946209	946308	RLOC_00000320	.	+	26.17	0.8599	0.0249	0.1245	0.3046
1	950310	950403	RLOC_00000321	.	-	17.41	0.3872	0.1405	0.3465	0.1223
1	951040	951125	RLOC_00000321	.	-	9.49	1.1444	0.02181	0.1153	0.1223
1	951210	951527	RLOC_00000321	.	-	11.63	1.2861	0.006495	0.05559	0.1223
1	949206	949296	RLOC_00000321	.	-	17.63	-0.1461	0.8864	0.9473	0.1223
1	948815	949075	RLOC_00000321	.	-	0.00	nan	nan	nan	0.1223
1	949620	949882	RLOC_00000321	.	-	0.00	nan	nan	nan	0.1223
1	950499	950581	RLOC_00000321	.	-	10.88	1.1165	0.122	0.32	0.1223
1	948991	949075	RLOC_00000321	.	-	23.66	0.1950	0.5493	0.7437	0.1223
1	948639	948696	RLOC_00000321	.	-	0.00	nan	nan	nan	0.1223
1	948008	948087	RLOC_00000321	.	-	31.45	-0.8380	0.05205	0.1944	0.1223
1	948594	948696	RLOC_00000321	.	-	26.50	-0.2677	0.5485	0.7432	0.1223
1	947663	947798	RLOC_00000321	.	-	0.00	nan	nan	nan	0.1223
1	949795	949882	RLOC_00000321	.	-	21.94	-0.4411	0.7226	0.856	0.1223
1	949451	949540	RLOC_00000321	.	-	13.90	-0.2093	0.6935	0.8386	0.1223
1	949620	949733	RLOC_00000321	.	-	14.42	0.0811	0.6881	0.8355	0.1223
1	948815	948911	RLOC_00000321	.	-	22.09	0.3687	0.3755	0.6047	0.1223
1	948342	948428	RLOC_00000321	.	-	24.08	-0.6349	0.0807	0.2513	0.1223
1	950793	950880	RLOC_00000321	.	-	14.46	0.4616	0.1199	0.3169	0.1223
1	948146	948234	RLOC_00000321	.	-	28.20	-0.3704	0.2518	0.4834	0.1223
1	950124	950197	RLOC_00000321	.	-	17.82	0.0856	0.4168	0.6412	0.1223
1	955248	955334	RLOC_00000322	.	+	0.04	nan	nan	nan	nan
1	959007	959427	RLOC_00000325	.	+	0.00	nan	nan	nan	nan
1	960293	960611	RLOC_00000326	.	-	1.23	-5.4661	0.8154	nan	nan
1	960631	968894	RLOC_00000326	.	-	0.06	17.2230	0.8154	nan	nan
1	964190	964294	RLOC_00000327	.	-	16.84	-0.2094	0.557	0.7493	0.193
1	966156	966445	RLOC_00000327	.	-	10.42	1.7319	0.01247	0.08249	0.193
1	964625	964738	RLOC_00000327	.	-	25.66	-0.1635	0.8826	0.9453	0.193
1	964379	964503	RLOC_00000327	.	-	18.56	0.3993	0.2706	0.5034	0.193
1	963545	963638	RLOC_00000327	.	-	23.61	-0.0160	0.8713	0.9393	0.193
1	965505	965598	RLOC_00000327	.	-	18.31	0.0215	0.5213	0.7236	0.193
1	965735	965995	RLOC_00000327	.	-	0.00	nan	nan	nan	0.193
1	963320	963468	RLOC_00000327	.	-	22.27	-0.0731	0.6983	0.8416	0.193
1	964872	964951	RLOC_00000327	.	-	21.80	-0.8571	0.03421	0.1511	0.193
1	965735	965822	RLOC_00000327	.	-	11.49	0.7390	0.2837	0.5173	0.193
1	965308	965452	RLOC_00000327	.	-	24.24	-0.1580	0.964	0.984	0.193
1	965040	965123	RLOC_00000327	.	-	17.51	-0.3100	0.9748	0.9889	0.193
1	965887	965995	RLOC_00000327	.	-	10.17	1.0820	0.0898	0.2677	0.193
1	969710	969907	RLOC_00000328	.	-	5.81	0.0510	0.9507	nan	nan
1	969704	969907	RLOC_00000328	.	-	0.00	nan	nan	nan	nan
1	968567	969314	RLOC_00000328	.	-	5.45	-0.0537	0.9496	nan	nan
1	976500	977279	RLOC_00000329	.	-	0.84	-0.6727	0.6686	nan	0.6754
1	976500	977367	RLOC_00000329	.	-	12.36	0.2254	0.1047	0.2928	0.6754
1	976073	976420	RLOC_00000329	.	-	1.77	-1.8083	0.4286	nan	0.6754
1	980893	980986	RLOC_00000330	.	-	219.59	0.3611	0.02353	0.1205	0.294
1	981159	981772	RLOC_00000330	.	-	283.08	0.2549	0.07338	0.2379	0.294
1	980102	980184	RLOC_00000330	.	-	381.20	-0.0504	0.4767	0.6894	0.294
1	980354	980777	RLOC_00000330	.	-	255.21	-0.1572	0.2246	0.4534	0.294
1	981159	981562	RLOC_00000330	.	-	1.05	-2.1370	0.959	nan	0.294
1	979798	979890	RLOC_00000330	.	-	426.07	-0.1651	0.06601	0.2238	0.294
1	977245	990991	RLOC_00000331	.	-	0.13	nan	nan	nan	nan
1	986540	986853	RLOC_00000332	.	+	0.04	-2.7146	0.992	nan	nan
1	987281	987523	RLOC_00000332	.	+	0.60	0.9745	0.9918	nan	nan
1	986067	986278	RLOC_00000332	.	+	0.00	nan	nan	nan	nan
1	989549	989652	RLOC_00000333	.	+	0.00	nan	nan	nan	nan
1	990458	990530	RLOC_00000333	.	+	0.00	nan	nan	nan	nan
1	989917	990048	RLOC_00000333	.	+	0.00	nan	nan	nan	nan
1	992690	992777	RLOC_00000334	.	+	480.98	-0.1997	0.002032	0.02716	0.04866
1	991745	992442	RLOC_00000334	.	+	554.86	0.1902	0.001802	0.02522	0.04866
1	994913	995312	RLOC_00000335	.	+	18.83	-0.3815	0.3871	0.6147	0.8825
1	994404	994495	RLOC_00000335	.	+	10.04	-0.0782	0.9544	0.9798	0.8825
1	993630	994045	RLOC_00000335	.	+	5.01	-0.7621	0.3564	nan	0.8825
1	993950	994045	RLOC_00000335	.	+	5.88	-0.6421	0.5294	nan	0.8825
1	993630	993705	RLOC_00000335	.	+	3.17	1.8546	0.02428	nan	0.8825
1	994631	994827	RLOC_00000335	.	+	9.61	0.4653	0.2274	0.4565	0.8825
1	994205	994353	RLOC_00000335	.	+	9.63	0.4323	0.7971	0.8989	0.8825
1	1000025	1000111	RLOC_00000336	.	+	328.85	-0.6797	0.01155	0.07883	0.1397
1	996938	997009	RLOC_00000336	.	+	0.23	9.9899	0.9061	nan	0.1397
1	996733	996847	RLOC_00000336	.	+	149.75	0.5103	0.007821	0.06224	0.1397
1	999679	999759	RLOC_00000336	.	+	263.99	0.0748	0.3176	0.5508	0.1397
1	997275	997417	RLOC_00000336	.	+	187.66	-0.2257	0.4295	0.6516	0.1397
1	997894	998168	RLOC_00000336	.	+	0.00	nan	nan	nan	0.1397
1	997894	998419	RLOC_00000336	.	+	170.95	0.0230	0.7172	0.8527	0.1397
1	999410	999503	RLOC_00000336	.	+	217.47	-0.0951	0.8384	0.9218	0.1397
1	997488	997603	RLOC_00000336	.	+	214.34	-0.0929	0.7888	0.8942	0.1397
1	998514	998732	RLOC_00000336	.	+	119.51	0.1073	0.3606	0.5915	0.1397
1	999016	999108	RLOC_00000336	.	+	166.61	-0.0198	0.7988	0.8999	0.1397
1	997059	997176	RLOC_00000336	.	+	5.68	-0.9930	0.8017	nan	0.1397
1	996938	997176	RLOC_00000336	.	+	170.91	0.2843	0.02928	0.1372	0.1397
1	996216	996425	RLOC_00000336	.	+	107.77	0.3130	0.1613	0.3754	0.1397
1	998299	998419	RLOC_00000336	.	+	0.00	nan	nan	nan	0.1397
1	997665	997754	RLOC_00000336	.	+	245.29	-0.0278	0.7724	0.8852	0.1397
1	1002383	1002470	RLOC_00000337	.	+	3.90	-0.6703	0.3351	nan	0.7717
1	1003267	1003388	RLOC_00000337	.	+	5.38	2.2900	0.1144	nan	0.7717
1	1003893	1003970	RLOC_00000337	.	+	11.16	0.2478	0.8005	0.9008	0.7717
1	1001300	1001435	RLOC_00000337	.	+	4.00	4.1903	0.001352	nan	0.7717
1	1001746	1001808	RLOC_00000337	.	+	1.48	0.0366	0.8722	nan	0.7717
1	1003653	1003809	RLOC_00000337	.	+	8.53	0.0869	0.7597	0.8779	0.7717
1	1002861	1002947	RLOC_00000337	.	+	9.61	-1.0140	0.1461	0.3547	0.7717
1	1002686	1002782	RLOC_00000337	.	+	11.16	0.2331	0.5049	0.7109	0.7717
1	1003031	1003136	RLOC_00000337	.	+	6.19	-0.3653	0.4145	nan	0.7717
1	1004026	1004124	RLOC_00000337	.	+	12.01	-0.5052	0.1655	0.381	0.7717
1	1002066	1002142	RLOC_00000337	.	+	2.10	-0.2731	0.9066	nan	0.7717
1	1003501	1003606	RLOC_00000337	.	+	6.33	-0.2900	0.8468	nan	0.7717
1	1006641	1006733	RLOC_00000338	.	+	225.54	-0.0123	0.7803	0.8896	0.1423
1	1005814	1005925	RLOC_00000338	.	+	83.89	0.3275	0.08157	0.253	0.1423
1	1005513	1005611	RLOC_00000338	.	+	127.01	-0.0192	0.9327	0.9698	0.1423
1	1007374	1007458	RLOC_00000338	.	+	147.55	-0.1179	0.4818	0.6933	0.1423
1	1007524	1007601	RLOC_00000338	.	+	186.08	-0.0973	0.589	0.7709	0.1423
1	1006796	1006916	RLOC_00000338	.	+	220.40	-0.0246	0.773	0.8855	0.1423
1	1006497	1006580	RLOC_00000338	.	+	141.65	0.3372	0.07282	0.2368	0.1423
1	1007206	1007289	RLOC_00000338	.	+	139.34	-0.4939	0.008033	0.06323	0.1423
1	1006073	1006175	RLOC_00000338	.	+	111.11	0.3279	0.2233	0.4521	0.1423
1	1006270	1006427	RLOC_00000338	.	+	145.91	0.1812	0.4065	0.6323	0.1423
1	1007731	1007827	RLOC_00000338	.	+	245.44	-0.1360	0.1809	0.4004	0.1423
1	1007000	1007080	RLOC_00000338	.	+	194.71	0.0843	0.6569	0.8162	0.1423
1	1005651	1005745	RLOC_00000338	.	+	104.85	0.0803	0.7503	0.8726	0.1423
1	1010117	1010248	RLOC_00000339	.	+	11.78	-1.3012	0.0001175	0.004505	0.00686
1	1008863	1008962	RLOC_00000339	.	+	10.57	1.3095	0.0001471	0.005219	0.00686
1	1011432	1011501	RLOC_00000341	.	-	133.39	-0.6361	0.01293	0.08417	0.1974
1	1012679	1012867	RLOC_00000341	.	-	104.82	0.3590	0.04258	0.1725	0.1974
1	1011688	1011777	RLOC_00000341	.	-	184.52	-0.2800	0.04955	0.1888	0.1974
1	1011556	1011653	RLOC_00000341	.	-	163.95	-0.4143	0.0146	0.09051	0.1974
1	1012235	1012334	RLOC_00000341	.	-	152.63	0.2491	0.173	0.3908	0.1974
1	1012438	1012508	RLOC_00000341	.	-	100.53	0.3408	0.02755	0.1323	0.1974
1	1012012	1012164	RLOC_00000341	.	-	122.02	0.1796	0.2115	0.4384	0.1974
1	1011857	1011941	RLOC_00000341	.	-	163.61	-0.2380	0.1384	0.3436	0.1974
1	1012911	1013178	RLOC_00000341	.	-	103.32	0.2682	0.1039	0.2916	0.1974
1	1012558	1012645	RLOC_00000341	.	-	107.04	0.3878	0.0149	0.09156	0.1974
1	1015303	1015427	RLOC_00000342	.	+	30.54	0.1682	0.428	0.6502	0.1416
1	1015049	1015198	RLOC_00000342	.	+	32.76	0.1923	0.3739	0.6033	0.1416
1	1016225	1016339	RLOC_00000342	.	+	11.69	-0.4367	0.8398	0.9225	0.1416
1	1014236	1014333	RLOC_00000342	.	+	22.49	-0.0827	0.8204	0.9118	0.1416
1	1016178	1016339	RLOC_00000342	.	+	3.39	-1.9258	0.4004	nan	0.1416
1	1015517	1015683	RLOC_00000342	.	+	40.78	0.1037	0.5527	0.7461	0.1416
1	1014871	1014950	RLOC_00000342	.	+	30.24	0.7709	0.007969	0.06296	0.1416
1	1016448	1016794	RLOC_00000342	.	+	53.40	-0.8702	0.02291	0.1186	0.1416
1	1017182	1017331	RLOC_00000342	.	+	47.78	0.1669	0.1988	0.4229	0.1416
1	1017480	1017567	RLOC_00000342	.	+	79.49	-0.6819	0.01454	0.09027	0.1416
1	1014542	1014634	RLOC_00000342	.	+	1.09	0.1052	0.908	nan	0.1416
1	1014542	1014620	RLOC_00000342	.	+	19.16	-0.1886	0.9474	0.9767	0.1416
1	1014236	1014413	RLOC_00000342	.	+	0.25	9.3794	1	nan	0.1416
1	1016950	1017057	RLOC_00000342	.	+	47.49	0.4815	0.01864	0.1049	0.1416
1	1014542	1014766	RLOC_00000342	.	+	13.51	0.9847	0.03148	0.1435	0.1416
1	1015824	1016078	RLOC_00000342	.	+	45.44	-0.0836	0.8553	0.9309	0.1416
1	1014675	1014766	RLOC_00000342	.	+	18.18	-0.0885	0.979	0.9908	0.1416
1	1018405	1019971	RLOC_00000343	.	+	0.38	-0.0767	0.9212	nan	nan
1	1019054	1019314	RLOC_00000343	.	+	0.75	0.9507	0.9547	nan	nan
1	1002719	1018135	RLOC_00000343	.	+	0.08	-2.2396	0.8228	nan	nan
1	1019393	1019603	RLOC_00000345	.	-	1.11	4.2269	0.4795	nan	nan
1	1020413	1020512	RLOC_00000345	.	-	2.98	-1.2234	0.1057	nan	nan
1	1021219	1021286	RLOC_00000345	.	-	0.92	3.0785	0.6795	nan	nan
1	1019778	1019905	RLOC_00000345	.	-	1.88	-2.5822	0.8576	nan	nan
1	1021442	1021799	RLOC_00000345	.	-	0.34	-9.6700	0.7533	nan	nan
1	1020091	1020186	RLOC_00000345	.	-	0.15	1.9887	1	nan	nan
1	1020817	1020981	RLOC_00000345	.	-	0.96	15.0679	0.4532	nan	nan
1	1020563	1020654	RLOC_00000345	.	-	2.65	-1.5505	0.3531	nan	nan
1	1022745	1022830	RLOC_00000346	.	-	0.00	nan	nan	nan	nan
1	1022911	1023007	RLOC_00000346	.	-	0.00	nan	nan	nan	nan
1	1027563	1027898	RLOC_00000347	.	-	1.11	-0.6139	0.8321	nan	1
1	1025586	1026065	RLOC_00000347	.	-	10.72	-0.0326	0.9707	0.9871	1
1	1027563	1027918	RLOC_00000347	.	-	0.43	0.0310	0.88	nan	1
1	1025115	1025366	RLOC_00000347	.	-	7.72	0.1657	0.9491	0.9774	1
1	1025094	1025292	RLOC_00000348	.	+	0.21	0.3314	0.996	nan	nan
1	1025567	1025864	RLOC_00000348	.	+	0.12	-0.4133	0.996	nan	nan
1	1032411	1032581	RLOC_00000349	.	-	41.91	-0.4245	0.2673	0.4997	0.03104
1	1034028	1034121	RLOC_00000349	.	-	26.14	-0.0175	0.9021	0.9548	0.03104
1	1035283	1035382	RLOC_00000349	.	-	13.16	0.1486	0.6744	0.8269	0.03104
1	1035054	1035139	RLOC_00000349	.	-	24.37	0.6800	0.06889	0.2293	0.03104
1	1031423	1031529	RLOC_00000349	.	-	1.50	1.7953	0.2425	nan	0.03104
1	1031572	1031688	RLOC_00000349	.	-	36.87	0.0777	0.7256	0.8577	0.03104
1	1034337	1034701	RLOC_00000349	.	-	9.46	-0.4244	0.7438	0.8689	0.03104
1	1032652	1032807	RLOC_00000349	.	-	34.61	0.2867	0.4161	0.6407	0.03104
1	1033536	1033875	RLOC_00000349	.	-	22.96	-0.0659	0.9318	0.9693	0.03104
1	1032162	1032243	RLOC_00000349	.	-	25.23	-0.7855	0.08187	0.2536	0.03104
1	1034777	1034885	RLOC_00000349	.	-	12.69	0.2390	0.4674	0.6824	0.03104
1	1031783	1031900	RLOC_00000349	.	-	35.70	-0.4610	0.1044	0.2922	0.03104
1	1031984	1032058	RLOC_00000349	.	-	37.84	-0.1358	0.7062	0.8462	0.03104
1	1033280	1033437	RLOC_00000349	.	-	23.87	-0.2454	0.7846	0.8921	0.03104
1	1032858	1033186	RLOC_00000349	.	-	23.02	1.1532	0.0009509	0.01717	0.03104
1	1035517	1035885	RLOC_00000349	.	-	24.71	0.2273	0.5094	0.7142	0.03104
1	1039084	1039223	RLOC_00000350	.	+	22.92	-0.3029	0.8953	0.9518	0.2847
1	1037745	1037923	RLOC_00000350	.	+	13.99	0.9694	0.02256	0.1177	0.2847
1	1036849	1036943	RLOC_00000350	.	+	18.19	0.3790	0.08078	0.2514	0.2847
1	1037440	1037530	RLOC_00000350	.	+	22.47	0.6671	0.02242	0.1173	0.2847
1	1038375	1038518	RLOC_00000350	.	+	23.81	-1.0676	0.1055	0.294	0.2847
1	1039388	1039487	RLOC_00000350	.	+	20.86	-0.0827	0.7395	0.8664	0.2847
1	1039605	1039694	RLOC_00000350	.	+	26.16	-0.4451	0.389	0.6165	0.2847
1	1036691	1036796	RLOC_00000350	.	+	20.31	0.4975	0.09721	0.2804	0.2847
1	1037017	1037092	RLOC_00000350	.	+	0.00	nan	nan	nan	0.2847
1	1038897	1038994	RLOC_00000350	.	+	33.93	-0.2765	0.4801	0.692	0.2847
1	1038174	1038275	RLOC_00000350	.	+	25.89	-0.7050	0.2698	0.5026	0.2847
1	1038704	1038800	RLOC_00000350	.	+	44.53	-0.2648	0.4668	0.682	0.2847
1	1037013	1037088	RLOC_00000350	.	+	14.11	0.7346	0.05979	0.2111	0.2847
1	1040679	1040873	RLOC_00000351	.	+	19.51	0.5135	0.167	0.3829	0.8088
1	1042092	1042238	RLOC_00000351	.	+	27.21	-0.2083	0.5764	0.7623	0.8088
1	1042314	1042567	RLOC_00000351	.	+	17.41	-0.4824	0.1796	0.3988	0.8088
1	1040973	1041048	RLOC_00000351	.	+	10.82	0.5252	0.3218	0.5548	0.8088
1	1042740	1042953	RLOC_00000352	.	-	212.25	-0.0183	0.9195	0.9633	1
1	1043162	1043391	RLOC_00000352	.	-	204.20	0.0186	0.9197	0.9634	1
1	1043162	1043391	RLOC_00000353	.	+	1.07	nan	nan	nan	nan
1	1048757	1048852	RLOC_00000354	.	-	5.52	0.7658	0.4047	nan	0.05275
1	1048421	1048498	RLOC_00000354	.	-	5.60	-0.2018	0.3658	nan	0.05275
1	1049208	1049617	RLOC_00000354	.	-	4.42	1.9146	0.0467	nan	0.05275
1	1046378	1046469	RLOC_00000354	.	-	15.97	0.3518	0.3785	0.6073	0.05275
1	1046876	1046986	RLOC_00000354	.	-	10.22	0.8323	0.1024	0.2892	0.05275
1	1048629	1048719	RLOC_00000354	.	-	7.75	1.1448	0.08472	0.2585	0.05275
1	1046535	1046623	RLOC_00000354	.	-	15.33	0.2730	0.3485	0.5803	0.05275
1	1046194	1046328	RLOC_00000354	.	-	20.88	-0.6138	0.1252	0.3246	0.05275
1	1045994	1046098	RLOC_00000354	.	-	18.59	-1.2308	0.002014	0.02703	0.05275
1	1048004	1048151	RLOC_00000354	.	-	8.59	-1.2852	0.3748	0.604	0.05275
1	1048914	1049013	RLOC_00000354	.	-	3.25	0.3426	0.6357	nan	0.05275
1	1051490	1051768	RLOC_00000356	.	+	216.19	0.5514	0.0005055	0.01149	0.007709
1	1052268	1052545	RLOC_00000356	.	+	259.75	0.1431	0.1544	0.3664	0.007709
1	1052774	1053326	RLOC_00000356	.	+	239.92	0.3344	0.01119	0.07731	0.007709
1	1052036	1052159	RLOC_00000356	.	+	219.62	0.1526	0.1358	0.34	0.007709
1	1054805	1054935	RLOC_00000356	.	+	285.31	0.0948	0.2746	0.5074	0.007709
1	1055087	1055173	RLOC_00000356	.	+	246.77	-0.2219	0.08012	0.2504	0.007709
1	1055289	1055477	RLOC_00000356	.	+	306.38	0.0489	0.5823	0.7665	0.007709
1	1056102	1056186	RLOC_00000356	.	+	493.52	-0.4688	0.0001379	0.005012	0.007709
1	1054199	1054662	RLOC_00000356	.	+	270.55	-0.1013	0.6846	0.8333	0.007709
1	1054384	1054464	RLOC_00000356	.	+	0.72	0.4717	0.8929	nan	0.007709
1	1052774	1053095	RLOC_00000356	.	+	18.07	0.6558	0.0876	0.2637	0.007709
1	1054384	1054484	RLOC_00000356	.	+	24.07	0.4182	0.1635	0.3782	0.007709
1	1053493	1053806	RLOC_00000356	.	+	227.00	0.0891	0.3986	0.6254	0.007709
1	1055707	1055797	RLOC_00000356	.	+	352.16	-0.1940	0.2294	0.4589	0.007709
1	1056287	1056433	RLOC_00000356	.	+	428.91	-0.3734	0.007939	0.06282	0.007709
1	1054554	1054662	RLOC_00000356	.	+	11.01	-0.5274	0.4287	0.6508	0.007709
1	1054527	1054662	RLOC_00000356	.	+	0.48	-11.0389	0.6418	nan	0.007709
1	1054199	1054284	RLOC_00000356	.	+	77.60	0.5492	0.003089	0.03512	0.007709
1	1053186	1053326	RLOC_00000356	.	+	56.21	0.4870	0.05907	0.2095	0.007709
1	1057329	1057634	RLOC_00000357	.	+	3.66	nan	nan	nan	nan
1	1060079	1060323	RLOC_00000358	.	+	35.94	-0.0962	0.7511	0.873	0.9858
1	1060633	1060731	RLOC_00000358	.	+	61.36	0.0867	0.4311	0.6531	0.9858
[truncated: 161,570 more rows]
