# Supplementary material for: Widespread premature transcription termination of Arabidopsis thaliana NLR genes by the spen protein FPA
Source: eLife. 2021 Apr 27;10:e65537. doi: 10.7554/eLife.65537 (PMC8116057; doi:10.7554/eLife.65537)
Supplement: Figure 6—source data 1. [file elife-65537-fig6-data1.csv]

genotype	tray	sporangiophores
col0	1	0
col0	1	0
col0	1	0
col0	1	0
col0	1	0
col0	1	0
col0	1	0
col0	1	0
col0	1	0
col0	1	0
col0	1	0
col0	1	0
col0	1	0
col0	1	0
col0	1	0
col0	1	2
col0	1	0
col0	1	0
col0	1	0
col0	1	0
col0	1	0
col0	1	0
col0	1	0
col0	1	0
col0	1	0
col0	1	0
col0	1	0
col0	1	0
col0	1	0
col0	1	0
col0	1	0
col0	1	0
col0	1	0
col0	1	0
col0	1	0
col0	1	0
col0	1	0
col0	1	0
col0	1	0
col0	1	0
col0	1	0
col0	1	0
col0	1	0
col0	1	0
col0	1	0
ksk1	1	16
ksk1	1	20
ksk1	1	8
ksk1	1	0
ksk1	1	14
ksk1	1	10
ksk1	1	19
ksk1	1	7
ksk1	1	19
ksk1	1	11
ksk1	1	7
ksk1	1	0
ksk1	1	10
ksk1	1	8
ksk1	1	3
ksk1	1	1
ksk1	1	9
ksk1	1	15
ksk1	1	5
ksk1	1	7
ksk1	1	6
ksk1	1	1
ksk1	1	6
ksk1	1	5
ksk1	1	8
ksk1	1	11
ksk1	1	10
ksk1	1	0
ksk1	1	7
ksk1	1	4
ksk1	1	9
ksk1	1	6
ksk1	1	0
ksk1	1	0
ksk1	1	0
ksk1	1	3
ksk1	1	0
ksk1	1	7
ksk1	1	6
ksk1	1	4
ksk1	1	9
ksk1	1	4
ksk1	1	6
ksk1	1	3
ksk1	1	3
fpa8	1	0
fpa8	1	1
fpa8	1	2
fpa8	1	13
fpa8	1	10
fpa8	1	3
fpa8	1	1
fpa8	1	1
fpa8	1	2
fpa8	1	0
fpa8	1	1
fpa8	1	0
fpa8	1	0
fpa8	1	1
fpa8	1	0
fpa8	1	3
fpa8	1	0
fpa8	1	0
fpa8	1	5
fpa8	1	0
fpa8	1	0
fpa8	1	4
fpa8	1	5
fpa8	1	2
fpa8	1	0
fpa8	1	1
fpa8	1	6
fpa8	1	0
fpa8	1	6
fpa8	1	0
fpa8	1	0
fpa8	1	0
fpa8	1	0
fpa8	1	0
fpa8	1	3
fpa8	1	0
fpa8	1	0
fpa8	1	2
fpa8	1	0
fpa8	1	0
fpa8	1	0
fpa8	1	0
fpa8	1	2
fpa8	1	0
fpa8	1	0
35SFPA	1	5
35SFPA	1	9
35SFPA	1	9
35SFPA	1	7
35SFPA	1	7
35SFPA	1	5
35SFPA	1	8
35SFPA	1	3
35SFPA	1	1
35SFPA	1	0
35SFPA	1	8
35SFPA	1	4
35SFPA	1	5
35SFPA	1	7
35SFPA	1	7
35SFPA	1	0
35SFPA	1	1
35SFPA	1	0
35SFPA	1	1
35SFPA	1	1
35SFPA	1	0
35SFPA	1	2
35SFPA	1	0
35SFPA	1	1
35SFPA	1	2
35SFPA	1	0
35SFPA	1	1
35SFPA	1	2
35SFPA	1	1
35SFPA	1	0
35SFPA	1	1
35SFPA	1	7
35SFPA	1	23
35SFPA	1	5
35SFPA	1	8
35SFPA	1	4
35SFPA	1	8
35SFPA	1	4
35SFPA	1	3
35SFPA	1	3
35SFPA	1	2
35SFPA	1	2
35SFPA	1	20
35SFPA	1	3
35SFPA	1	5
col0	2	0
col0	2	0
col0	2	0
col0	2	0
col0	2	0
col0	2	0
col0	2	0
col0	2	0
col0	2	0
col0	2	1
col0	2	0
col0	2	0
col0	2	0
col0	2	0
col0	2	0
col0	2	0
col0	2	0
col0	2	0
col0	2	0
col0	2	0
col0	2	0
col0	2	0
col0	2	0
col0	2	1
col0	2	0
col0	2	0
col0	2	0
col0	2	0
col0	2	0
col0	2	0
col0	2	0
col0	2	0
col0	2	0
col0	2	0
col0	2	0
col0	2	0
col0	2	0
col0	2	0
col0	2	0
col0	2	0
col0	2	0
col0	2	0
col0	2	0
col0	2	0
col0	2	0
ksk1	2	17
ksk1	2	4
ksk1	2	6
ksk1	2	7
ksk1	2	9
ksk1	2	4
ksk1	2	0
ksk1	2	1
ksk1	2	7
ksk1	2	11
ksk1	2	8
ksk1	2	4
ksk1	2	3
ksk1	2	5
ksk1	2	1
ksk1	2	12
ksk1	2	5
ksk1	2	1
ksk1	2	1
ksk1	2	5
ksk1	2	4
ksk1	2	5
ksk1	2	4
ksk1	2	3
ksk1	2	4
ksk1	2	6
ksk1	2	11
ksk1	2	3
ksk1	2	0
ksk1	2	11
ksk1	2	2
ksk1	2	1
ksk1	2	2
ksk1	2	13
ksk1	2	5
ksk1	2	7
ksk1	2	0
ksk1	2	2
ksk1	2	4
ksk1	2	0
ksk1	2	4
ksk1	2	4
ksk1	2	4
ksk1	2	0
ksk1	2	0
fpa8	2	0
fpa8	2	2
fpa8	2	0
fpa8	2	1
fpa8	2	0
fpa8	2	0
fpa8	2	3
fpa8	2	1
fpa8	2	1
fpa8	2	4
fpa8	2	0
fpa8	2	0
fpa8	2	1
fpa8	2	1
fpa8	2	2
fpa8	2	4
fpa8	2	8
fpa8	2	0
fpa8	2	0
fpa8	2	0
fpa8	2	0
fpa8	2	0
fpa8	2	0
fpa8	2	1
fpa8	2	0
fpa8	2	0
fpa8	2	0
fpa8	2	2
fpa8	2	0
fpa8	2	0
fpa8	2	0
fpa8	2	0
fpa8	2	3
fpa8	2	2
35SFPA	2	5
35SFPA	2	6
35SFPA	2	7
35SFPA	2	8
35SFPA	2	7
35SFPA	2	0
35SFPA	2	1
35SFPA	2	4
35SFPA	2	1
35SFPA	2	1
35SFPA	2	0
35SFPA	2	3
35SFPA	2	0
35SFPA	2	4
35SFPA	2	17
35SFPA	2	3
35SFPA	2	8
35SFPA	2	10
35SFPA	2	5
35SFPA	2	4
35SFPA	2	1
35SFPA	2	1
35SFPA	2	3
35SFPA	2	1
35SFPA	2	4
35SFPA	2	1
35SFPA	2	1
35SFPA	2	0
35SFPA	2	2
35SFPA	2	1
35SFPA	2	3
35SFPA	2	1
35SFPA	2	0
35SFPA	2	0
35SFPA	2	3
35SFPA	2	7
35SFPA	2	7
35SFPA	2	7
35SFPA	2	4
35SFPA	2	1
35SFPA	2	2
35SFPA	2	5
35SFPA	2	3
col0	3	0
col0	3	0
col0	3	0
col0	3	0
col0	3	0
col0	3	0
col0	3	0
col0	3	0
col0	3	0
col0	3	0
col0	3	0
col0	3	0
col0	3	0
col0	3	0
col0	3	0
col0	3	0
col0	3	0
col0	3	0
col0	3	0
col0	3	0
col0	3	0
col0	3	1
col0	3	0
col0	3	0
col0	3	0
col0	3	0
col0	3	0
col0	3	0
col0	3	1
col0	3	0
col0	3	0
col0	3	0
col0	3	0
col0	3	0
col0	3	1
col0	3	0
col0	3	0
col0	3	0
col0	3	0
col0	3	1
col0	3	0
col0	3	0
col0	3	0
col0	3	0
col0	3	0
ksk1	3	15
ksk1	3	13
ksk1	3	9
ksk1	3	0
ksk1	3	0
ksk1	3	21
ksk1	3	18
fpa8	3	0
fpa8	3	21
fpa8	3	5
fpa8	3	3
fpa8	3	1
fpa8	3	0
fpa8	3	9
fpa8	3	0
fpa8	3	0
fpa8	3	1
fpa8	3	1
fpa8	3	5
fpa8	3	1
fpa8	3	0
fpa8	3	0
fpa8	3	9
fpa8	3	0
fpa8	3	1
fpa8	3	0
fpa8	3	5
fpa8	3	0
fpa8	3	1
fpa8	3	5
fpa8	3	0
fpa8	3	0
fpa8	3	0
fpa8	3	0
fpa8	3	1
fpa8	3	0
fpa8	3	0
fpa8	3	0
fpa8	3	1
fpa8	3	0
fpa8	3	1
fpa8	3	0
fpa8	3	2
fpa8	3	2
fpa8	3	0
fpa8	3	0
fpa8	3	1
fpa8	3	2
fpa8	3	0
fpa8	3	0
fpa8	3	0
fpa8	3	19
35SFPA	3	4
35SFPA	3	13
35SFPA	3	7
35SFPA	3	17
35SFPA	3	4
35SFPA	3	1
35SFPA	3	26
35SFPA	3	12
35SFPA	3	7
35SFPA	3	12
35SFPA	3	9
35SFPA	3	5
35SFPA	3	3
35SFPA	3	9
35SFPA	3	5
35SFPA	3	4
35SFPA	3	1
35SFPA	3	14
35SFPA	3	7
35SFPA	3	2
35SFPA	3	0
35SFPA	3	5
35SFPA	3	8
35SFPA	3	1
35SFPA	3	5
35SFPA	3	2
35SFPA	3	5
35SFPA	3	3
35SFPA	3	1
35SFPA	3	1
35SFPA	3	4
35SFPA	3	1
35SFPA	3	1
35SFPA	3	1
35SFPA	3	0
35SFPA	3	3
35SFPA	3	11
35SFPA	3	0
35SFPA	3	3
35SFPA	3	15
35SFPA	3	4
35SFPA	3	2
35SFPA	3	0
35SFPA	3	7
35SFPA	3	11
fpa7	1	0
fpa7	1	0
fpa7	1	0
fpa7	1	0
fpa7	1	0
fpa7	1	0
fpa7	1	0
fpa7	1	0
fpa7	1	0
fpa7	1	0
fpa7	1	0
fpa7	1	0
fpa7	1	0
fpa7	1	0
fpa7	1	0
fpa7	1	0
fpa7	1	0
fpa7	1	0
fpa7	1	0
fpa7	1	0
fpa7	1	0
fpa7	1	0
fpa7	1	0
fpa7	1	0
fpa7	1	0
fpa7	1	0
fpa7	1	0
fpa7	1	0
fpa7	1	0
fpa7	1	0
fpa7	1	0
fpa7	1	1
fpa7	2	0
fpa7	2	0
fpa7	2	0
fpa7	2	0
fpa7	2	0
fpa7	2	0
fpa7	2	0
fpa7	2	0
fpa7	2	0
fpa7	2	0
fpa7	2	0
fpa7	2	0
fpa7	2	0
fpa7	2	0
fpa7	2	0
fpa7	2	0
fpa7	2	0
fpa7	2	0
fpa7	2	0
fpa7	2	0
fpa7	2	0
fpa7	2	0
fpa7	2	0
fpa7	2	0
fpa7	2	0
fpa7	2	0
fpa7	2	0
fpa7	2	0
fpa7	2	0
fpa7	2	0
fpa7	2	0
fpa7	2	0
fpa7	2	0
fpa7	2	0
fpa7	2	0
fpa7	2	0
fpa7	2	0
fpa7	2	0
fpa7	2	0
fpa7	2	0
fpa7	2	0
fpa7	2	0
fpa7	2	0
fpa7	2	0
fpa7	2	0
fpa7	3	0
fpa7	3	0
fpa7	3	0
fpa7	3	0
fpa7	3	0
fpa7	3	0
fpa7	3	1
fpa7	3	0
fpa7	3	0
fpa7	3	0
fpa7	3	0
fpa7	3	0
fpa7	3	0
fpa7	3	1
fpa7	3	0
fpa7	3	0
fpa7	3	0
fpa7	3	0
fpa7	3	0
fpa7	3	0
fpa7	3	0
fpa7	3	0
fpa7	3	0
fpa7	3	0
fpa7	3	0
fpa7	3	0
fpa7	3	0
fpa7	3	0
fpa7	3	0
fpa7	3	0
fpa7	3	0
fpa7	3	0
fpa7	3	0
fpa7	3	0
fpa7	3	0
fpa7	3	0
fpa7	3	0
fpa7	3	0
fpa7	3	0
fpa7	3	0
fpa7	3	0
fpa7	3	0
fpa7	3	0
fpa7	3	0
fpa7	3	0
FPAc	1	1
FPAc	1	0
FPAc	1	9
FPAc	1	5
FPAc	1	0
FPAc	1	0
FPAc	1	2
FPAc	1	4
FPAc	1	0
FPAc	1	0
FPAc	1	7
FPAc	1	0
FPAc	1	4
FPAc	1	3
FPAc	1	2
FPAc	1	0
FPAc	1	0
FPAc	1	6
FPAc	1	0
FPAc	1	11
FPAc	1	0
FPAc	1	0
FPAc	1	0
FPAc	1	2
FPAc	1	1
FPAc	1	0
FPAc	1	0
FPAc	1	0
FPAc	1	2
FPAc	1	0
FPAc	1	0
FPAc	1	1
FPAc	1	8
FPAc	1	1
FPAc	1	0
FPAc	1	3
FPAc	2	1
FPAc	2	6
FPAc	2	0
FPAc	2	1
FPAc	2	0
FPAc	2	1
FPAc	2	2
FPAc	2	1
FPAc	2	1
FPAc	2	7
FPAc	2	6
FPAc	2	1
FPAc	2	0
FPAc	2	1
FPAc	2	1
FPAc	2	0
FPAc	2	0
FPAc	2	0
FPAc	2	0
FPAc	2	0
FPAc	2	0
FPAc	2	0
FPAc	2	1
FPAc	2	0
FPAc	2	2
FPAc	2	1
FPAc	2	0
FPAc	2	0
FPAc	2	0
FPAc	2	0
FPAc	2	0
FPAc	2	0
FPAc	2	2
FPAc	2	0
FPAc	2	0
FPAc	2	0
FPAc	2	0
FPAc	2	0
FPAc	2	1
FPAc	2	0
FPAc	2	0
FPAc	2	0
FPAc	2	0
FPAc	2	3
FPAc	2	0
FPAc	3	4
FPAc	3	0
FPAc	3	3
FPAc	3	1
FPAc	3	0
FPAc	3	0
FPAc	3	0
FPAc	3	0
FPAc	3	0
FPAc	3	1
FPAc	3	0
FPAc	3	20
FPAc	3	0
FPAc	3	20
FPAc	3	0
FPAc	3	4
FPAc	3	0
FPAc	3	0
FPAc	3	0
FPAc	3	0
FPAc	3	0
FPAc	3	0
FPAc	3	0
FPAc	3	0
FPAc	3	2
FPAc	3	1
FPAc	3	6
FPAc	3	0
FPAc	3	13
FPAc	3	1
FPAc	3	2
FPAc	3	0
FPAc	3	0
FPAc	3	0
FPAc	3	0
FPAc	3	0
FPAc	3	1
FPAc	3	3
FPAc	3	0
FPAc	3	37
FPAc	3	0
FPAc	3	10
FPAc	3	7
FPAc	3	12
FPAc	3	0
